# Supplementary material for: Secreted Rhizobacterial β-Glucosidase Unlocks Coumarin-Mediated Root Iron Uptake
Source: Research Square preprint supplement (doi:10.21203/rs.3.rs-5909771/v1), 2025-02-20
Supplement: Supplementary file 1 [file 057ce245ebd7abf00e5736aa.xlsx]

## Sheet: Sheet1
Supplemental Table 13. Coumarin concentration ratio of glycoside to aglycon in root extracts of plants exposed to low Fe availability at different growth stages.
	Scopolin to scopoletin ratio
	4 d	7 d	10 d	21 d
Col-0 (av Fe)	0.718458	1.38947	1.42489	19.9342
	0.732929	2.447	1.50679	20.6581
	0.544654	0.72197	1.4721	21.0954
Col-0 (Low Fe)	0.311804	0.287782	0.576159	47.9682
	0.140949	0.295043	0.563991	54.8796
	0.387909	0.303327	0.559913	54.4954
	Fraxin to fraxetin ratio
	4 d	7 d	10 d	21 d
Col-0 (Low Fe)	0.0888889	0.441026	0.13522	3.42105
	0.0147783	0.678919	0.153846	3.09091
	0.2	0.679119	0.161654	2.52174
