# Supplementary material for: Secreted Rhizobacterial β-Glucosidase Unlocks Coumarin-Mediated Root Iron Uptake
Source: Research Square preprint supplement (doi:10.21203/rs.3.rs-5909771/v1), 2025-02-20
Supplement: Supplementary file 2 [file 05a7ee27fe525b0e61b3fb49.xlsx]

## Sheet: Sheet1
Supplemental Table 9. List of all detected proteins in analyzed fractions after partial purification
Accession	Description	Score	Coverage	# Proteins	# Unique Peptides	# Peptides	# PSMs	# AAs	MW [kDa]	calc. pI
A594_1_02297	Multiple sugar-binding periplasmic receptor ChvE	1140.81	81.3	1	23	23	403	353	37.7743	5.07178
A594_1_05787	hypothetical protein	980.716	73.65	1	19	19	266	315	32.184	5.22412
A594_1_02113	hypothetical protein	760.019	74.21	1	9	9	222	159	16.3544	6.68311
A594_1_02244	Leu/Ile/Val-binding protein	705.616	57.67	1	16	17	214	378	39.6258	5.49072
A594_1_03666	Xylitol-binding protein	661.969	82.47	1	19	19	168	308	31.9737	5.19873
A594_1_06424	hypothetical protein	628.72	78.78	1	22	22	181	344	36.76	5.05908
A594_1_00048	Periplasmic oligopeptide-binding protein	620.971	72.28	1	28	29	183	534	60.132	5.2876
A594_1_00415	Membrane lipoprotein TmpC	601.931	74.62	1	18	18	150	331	34.9018	5.33838
A594_1_01505	60 kDa chaperonin 5	591.356	63.44	3	26	29	187	547	58.1107	5.49072
A594_1_01785	Leu/Ile/Val-binding protein	578.561	75.68	1	23	23	156	370	38.5578	5.36377
A594_1_03872	hypothetical protein	565.551	35.23	1	4	4	135	176	19.3579	7.41553
A594_1_02821	putative sugar-binding periplasmic protein	459.253	76.83	1	20	20	120	423	45.1398	5.60498
A594_1_02803	Periplasmic dipeptide transport protein	446.399	79.4	1	20	26	134	529	58.8101	5.18604
A594_1_01883	hypothetical protein	435.854	72.89	1	15	15	123	332	34.349	5.47803
A594_1_03215	Tol-Pal system protein TolB	426.486	73.5	1	21	21	117	434	46.7247	5.87158
A594_1_04439	hypothetical protein	425.536	70.1	1	19	19	109	388	40.5235	5.60498
A594_1_03058	Putative amino-acid ABC transporter-binding protein YhdW	395.031	76.61	1	19	19	104	342	36.5535	5.21143
A594_1_02802	Periplasmic dipeptide transport protein	365.952	70.3	1	18	23	114	532	58.8621	5.24951
A594_1_04657	Spermidine-binding periplasmic protein SpuE	318.162	78.9	1	23	23	93	365	40.1655	5.31299
A594_1_07950	Periplasmic oligopeptide-binding protein	299.659	68.28	1	27	28	89	536	59.1761	5.60498
A594_1_03452	Nopaline-binding periplasmic protein	294.322	70.57	1	13	13	93	265	28.4102	5.07178
A594_1_07242	Glutathione-binding protein GsiB	290.531	79.33	1	24	25	84	508	55.4175	6.07471
A594_1_02114	hypothetical protein	280.821	57	1	10	10	91	200	21.8282	5.65576
A594_1_01094	Purine-binding protein	279.154	72.42	1	20	20	75	359	39.0409	6.96143
A594_1_02089	Foldase protein PrsA	277.319	70.82	1	19	19	82	329	34.9143	5.12256
A594_1_02135	hypothetical protein	261.308	82.42	1	12	12	66	256	25.8805	6.41748
A594_1_02153	Aconitate isomerase	254.682	44.49	1	9	9	70	263	26.8855	7.25439
A594_1_05769	ABC transporter glutamine-binding protein GlnH	254.528	70.29	1	14	14	83	276	29.3501	5.32568
A594_1_01559	Intermembrane phospholipid transport system binding protein MlaC	252.31	67.8	1	13	13	76	205	22.1845	9.979
A594_1_05738	hypothetical protein	232.644	60.13	1	10	10	61	301	31.0499	4.62744
A594_1_07014	Pyruvate, phosphate dikinase	230.225	55.22	1	36	36	69	891	96.8874	5.49072
A594_1_05295	hypothetical protein	224.08	78.29	1	16	16	59	327	34.2176	5.89697
A594_1_07058	putative periplasmic iron-binding protein	221.351	58.94	1	11	11	57	302	32.8057	4.88135
A594_1_03453	Nopaline-binding periplasmic protein	220.559	65.27	1	15	15	66	262	28.3054	5.19873
A594_1_02891	Iron uptake system component EfeO	218.471	60.95	1	18	18	62	274	29.9766	5.021
A594_1_03928	Disulfide bond formation protein D	217.304	62.98	1	10	10	59	208	22.1792	5.23682
A594_1_02804	Periplasmic dipeptide transport protein	214.748	52.54	1	13	20	68	531	58.6973	5.19873
A594_1_02115	hypothetical protein	214.689	57.31	1	6	6	64	171	18.5135	5.57959
A594_1_03852	hypothetical protein	204.469	34.83	1	11	11	50	333	35.7083	5.32568
A594_1_03373	hypothetical protein	200.992	60.18	1	19	19	59	442	48.4295	5.021
A594_1_06401	hypothetical protein	200.892	59.44	1	18	18	55	461	51.1956	6.39209
A594_1_04561	hypothetical protein	199.94	71.73	1	20	20	58	421	45.972	5.18604
A594_1_03279	hypothetical protein	195.153	46.35	1	18	18	57	438	47.7977	6.34131
A594_1_05203	Iron deficiency-induced protein A	192.026	69.12	1	15	15	58	340	36.1178	5.90967
A594_1_08031	hypothetical protein	190.155	41.79	1	4	4	59	134	14.1579	6.30322
A594_1_01564	hypothetical protein	190.153	67.06	1	19	19	57	513	53.7841	4.99561
A594_1_04308	hypothetical protein	188.887	59.12	1	12	12	45	340	35.9674	5.66846
A594_1_00333	Molybdate-binding protein ModA	186.339	69.58	1	15	15	52	263	27.5047	8.68994
A594_1_03672	hypothetical protein	185.898	61.93	1	11	11	48	218	22.2984	4.91943
A594_1_02073	hypothetical protein	185.778	51	1	14	14	53	402	42.6566	5.57959
A594_1_00623	hypothetical protein	184.495	65.23	1	14	14	56	325	36.382	5.47803
A594_1_03355	hypothetical protein	183.729	73.18	1	16	16	54	343	35.1904	5.13525
A594_1_02174	D-methionine-binding lipoprotein MetQ	180.808	51.87	1	9	9	45	268	28.2629	5.33838
A594_1_01675	Phosphate-binding protein PstS	174.028	58.52	1	15	15	46	352	37.0159	6.27783
A594_1_02249	hypothetical protein	172.413	63.08	1	29	29	51	604	67.3381	5.89697
A594_1_05799	Glucans biosynthesis protein D	165.847	62.08	1	20	20	49	538	59.6119	5.50342
A594_1_02400	NAD-specific glutamate dehydrogenase	165.373	29.7	1	35	35	50	1623	179.819	5.88428
A594_1_04483	Elongation factor G	165.266	51.66	1	21	21	45	691	76.1896	5.24951
A594_1_00381	Glutathione-binding protein GsiB	160.999	61.19	1	20	20	45	536	59.0699	5.61768
A594_1_03935	hypothetical protein	159.283	60	1	26	26	49	595	66.2179	5.50342
A594_1_04194	Leu/Ile/Val-binding protein	159.02	52.13	1	12	12	47	399	42.892	5.66846
A594_1_02753	putative ABC transporter-binding protein	158.225	50.82	1	13	15	48	425	45.5062	5.63037
A594_1_03362	Putative aliphatic sulfonates-binding protein	157.413	78.7	1	17	17	46	338	35.6978	5.32568
A594_1_03201	Transketolase 1	156.899	65.01	1	22	22	47	663	71.3001	6.37939
A594_1_00543	Periplasmic oligopeptide-binding protein	156.783	59.4	2	21	21	43	532	58.8396	5.50342
A594_1_03176	Erythritol/L-threitol-binding protein	150.131	66.89	1	19	19	41	441	46.8621	5.68115
A594_1_02376	hypothetical protein	148.323	46.81	1	5	5	36	141	14.9502	4.88135
A594_1_06771	hypothetical protein	145.899	55.48	1	6	6	43	155	16.6866	6.80029
A594_1_05817	Isocitrate dehydrogenase [NADP]	145.021	51.73	1	19	19	42	404	45.4192	5.97314
A594_1_00598	putative D,D-dipeptide-binding periplasmic protein DdpA	144.662	46.92	1	19	19	42	535	59.0909	6.02393
A594_1_01707	Periplasmic dipeptide transport protein	140.637	55.31	1	21	21	39	537	58.9286	6.62451
A594_1_04041	Polyribonucleotide nucleotidyltransferase	139.658	33.33	1	23	23	49	711	76.7371	5.52881
A594_1_07089	hypothetical protein	137.902	55.07	1	18	18	42	414	44.7109	5.40186
A594_1_06040	HTH-type transcriptional regulator SgrR	137.864	42.22	1	16	16	39	540	59.1629	5.45264
A594_1_06728	Trifunctional nucleotide phosphoesterase protein YfkN	137.857	68.24	1	17	17	37	507	53.3127	5.52881
A594_1_05288	hypothetical protein	137.579	50.16	1	20	20	39	622	70.3733	5.79541
A594_1_06411	hypothetical protein	136.855	72.36	1	12	12	36	246	26.284	6.27783
A594_1_06799	Chaperone SurA	136.437	47.44	1	16	16	41	430	46.1375	9.42236
A594_1_01276	hypothetical protein	135.407	65.3	1	12	12	37	317	33.1381	5.97314
A594_1_04123	Chaperone protein DnaK	134.089	46.64	1	26	26	40	639	68.2453	5.09717
A594_1_01590	Adenosylhomocysteinase	133.257	52.07	1	19	19	41	434	47.523	5.84619
A594_1_03475	Aconitate hydratase A	132.692	44.36	1	24	24	40	895	97.6605	5.57959
A594_1_07910	sn-glycerol-3-phosphate-binding periplasmic protein UgpB	131.36	43.65	1	13	13	43	433	46.7006	5.77002
A594_1_04061	Oligopeptide-binding protein AppA	129.397	55.56	1	18	18	39	558	60.3133	5.37646
A594_1_03948	hypothetical protein	128.902	66.15	1	12	12	39	322	33.8327	6.62451
A594_1_03942	Sulfate-binding protein	128.182	71.86	1	16	16	36	334	36.1228	6.82959
A594_1_01918	Trifunctional nucleotide phosphoesterase protein YfkN	126.428	44.31	1	21	21	40	650	69.1319	6.06201
A594_1_02901	putative amino-acid ABC transporter-binding protein	126.182	68.46	1	18	18	41	260	28.0246	5.68115
A594_1_07229	Periplasmic dipeptide transport protein	125.073	59.59	1	22	22	38	537	58.5097	6.49365
A594_1_03402	Lipopolysaccharide export system protein LptA	124.902	56.25	1	13	13	33	288	30.6637	5.80811
A594_1_01618	Glutathione-binding protein GsiB	124.16	47.27	1	14	14	36	495	53.6262	5.09717
A594_1_00654	putative zinc protease	124.16	61.1	1	17	17	35	437	45.797	5.5415
A594_1_07592	Periplasmic pH-dependent serine endoprotease DegQ	123.829	52.67	2	16	16	35	524	54.3731	5.18604
A594_1_00122	putative protein	123.803	67.85	1	18	18	37	367	38.7319	5.12256
A594_1_05711	hypothetical protein	122.566	57.21	1	18	18	36	437	47.9842	5.24951
A594_1_05792	Nicotinamidase	121.933	56.07	1	9	9	30	239	24.9477	5.74463
A594_1_02605	hypothetical protein	120.615	44.97	1	11	11	33	338	33.8602	5.69385
A594_1_00168	Putative ABC transporter substrate-binding protein YesO	119.909	61.31	1	21	21	34	429	47.0089	7.86963
A594_1_02707	Cytochrome c2	119.622	57.26	1	6	6	38	124	12.8105	8.85107
A594_1_02343	sn-glycerol-3-phosphate-binding periplasmic protein UgpB	119.002	41.4	1	13	13	33	442	48.5396	5.18604
A594_1_03069	Heme-binding protein A	118.503	56.58	1	19	20	34	555	62.0416	5.68115
A594_1_02322	Lysine 6-dehydrogenase	117.99	71.83	1	18	18	35	355	38.948	6.25244
A594_1_06022	hypothetical protein	116.342	61.06	1	13	13	33	321	32.7594	5.24951
A594_1_03712	2-oxoglutarate dehydrogenase E1 component	115.275	28.38	1	19	19	35	969	106.94	6.22705
A594_1_06834	hypothetical protein	115.019	54.72	1	15	15	34	424	45.3874	5.38916
A594_1_06036	putative D,D-dipeptide-binding periplasmic protein DdpA	114.653	56.71	1	19	19	34	529	58.6757	5.63037
A594_1_02561	Malate dehydrogenase	113.204	78.13	1	14	14	29	320	33.4025	5.41455
A594_1_06023	Succinate-semialdehyde dehydrogenase [NADP(+)]	111.946	44.6	1	16	16	33	500	52.8911	5.64307
A594_1_01615	hypothetical protein	111.809	58.47	1	16	16	33	419	45.0217	5.56689
A594_1_06459	Superoxide dismutase [Fe]	111.184	59.9	1	10	10	32	202	22.3194	6.88818
A594_1_04493	DNA-directed RNA polymerase subunit beta	110.556	31.02	1	30	30	36	1396	155.309	5.38916
A594_1_02929	hypothetical protein	110.078	30.04	1	20	20	31	962	105.716	6.34131
A594_1_06988	Beta-alanine--pyruvate aminotransferase	109.998	55.48	1	13	13	31	447	48.5818	6.7124
A594_1_05290	hypothetical protein	109.111	68.08	1	10	10	32	213	21.5558	5.52881
A594_1_00592	Leu/Ile/Val-binding protein	107.924	53.03	1	11	12	30	379	39.537	5.09717
A594_1_01664	NADP-dependent malic enzyme	107.398	34.95	1	18	18	32	761	82.1259	6.3667
A594_1_06710	Carbon monoxide dehydrogenase large chain	106.748	25.83	1	13	13	29	786	83.9031	5.78271
A594_1_04451	Acetyl-CoA acetyltransferase	106.446	71.54	1	14	14	28	390	40.0466	7.02002
A594_1_00115	hypothetical protein	105.762	55.46	1	5	5	36	119	12.7659	9.80322
A594_1_05777	hypothetical protein	105.698	57.6	1	10	10	28	250	27.015	5.17334
A594_1_04600	Alpha-keto acid-binding periplasmic protein TakP	104.497	50.69	1	12	12	29	363	39.8914	8.07471
A594_1_07905	Aminopeptidase	104.327	30.06	1	9	9	27	539	56.3016	5.19873
A594_1_03054	hypothetical protein	104.15	31.28	1	12	12	28	486	53.5743	5.24951
A594_1_05280	Membrane lipoprotein TmpC	103.735	62.57	1	13	13	31	342	35.7644	4.91943
A594_1_03387	hypothetical protein	103.584	60.23	1	11	11	31	259	27.0619	6.21436
A594_1_01015	Lysine/arginine/ornithine-binding periplasmic protein	102.362	62.02	1	10	10	28	258	27.7453	4.97021
A594_1_01635	ABC transporter arginine-binding protein 1	100.714	80.08	1	15	15	28	256	26.6983	5.32568
A594_1_00747	hypothetical protein	99.6233	64.22	1	16	16	31	341	36.661	5.0083
A594_1_00825	Glutathione-binding protein GsiB	99.6049	46.09	1	14	14	29	499	54.576	5.21143
A594_1_02068	Peptidyl-prolyl cis-trans isomerase A	98.6935	73.02	1	12	12	33	215	22.7519	8.1626
A594_1_02862	putative sugar-binding periplasmic protein	98.6864	42.79	1	12	12	25	416	44.6714	5.07178
A594_1_00240	hypothetical protein	98.1093	58.7	1	18	18	27	477	53.5326	5.09717
A594_1_01592	hypothetical protein	97.5221	45.79	1	9	9	27	321	32.7187	4.89404
A594_1_04482	Elongation factor Tu	97.395	58.33	1	13	13	28	396	42.9511	5.51611
A594_1_04032	hypothetical protein	97.3921	48.23	1	20	20	30	651	70.2726	5.42725
A594_1_02371	hypothetical protein	96.1555	42.92	1	15	15	26	452	48.3234	5.2749
A594_1_00558	Superoxide dismutase [Fe]	96.1272	65.13	1	8	8	23	238	25.1428	6.88818
A594_1_01949	2-isopropylmalate synthase	95.9906	59.96	1	23	23	31	562	61.9537	5.60498
A594_1_06788	hypothetical protein	95.0976	56.67	1	7	7	26	240	24.4406	8.19189
A594_1_03808	Beta-barrel assembly-enhancing protease	95.0864	40.85	1	17	17	27	568	62.0471	5.30029
A594_1_04179	Glutathione-binding protein GsiB	94.5386	52.94	1	18	18	26	510	55.4726	5.56689
A594_1_07304	putative protein	94.4493	64.93	1	16	16	28	345	36.8707	6.82959
A594_1_01809	hypothetical protein	93.844	49.29	1	12	12	26	353	38.1801	6.29053
A594_1_03224	Ribose import binding protein RbsB	93.3168	56.55	1	11	11	28	313	33.8564	5.24951
A594_1_03699	ABC transporter glutamine-binding protein GlnH	93.1078	56.7	1	12	12	28	261	28.003	5.57959
A594_1_00719	Periplasmic dipeptide transport protein	93.046	48.1	1	15	15	27	526	57.6743	5.13525
A594_1_02044	hypothetical protein	92.7634	56.03	1	11	11	26	307	31.5652	5.18604
A594_1_04669	Spermidine-binding periplasmic protein SpuE	92.3223	52.94	1	7	8	26	306	33.6636	5.33838
A594_1_06154	Glutathione-binding protein GsiB	92.1663	40.7	1	16	16	27	511	55.5958	5.33838
A594_1_04492	DNA-directed RNA polymerase subunit beta'	92.1562	19.64	1	22	22	31	1441	159.669	7.12256
A594_1_02166	ATP synthase subunit beta	91.8656	50.31	1	15	15	28	477	51.0684	5.04639
A594_1_07150	Ribose import binding protein RbsB	91.5953	50.16	1	13	13	27	309	32.0967	5.37646
A594_1_03873	hypothetical protein	91.4043	63.68	1	11	11	28	234	25.3284	7.95752
A594_1_01934	Cytochrome c'	91.2393	58.55	1	6	6	20	152	15.666	8.60205
A594_1_00402	Protein-methionine-sulfoxide reductase catalytic subunit MsrP	90.0107	52.12	1	13	14	26	401	43.386	7.57666
A594_1_03379	putative periplasmic iron-binding protein	89.8571	76.43	1	14	14	25	297	31.129	5.36377
A594_1_02706	Isoquinoline 1-oxidoreductase subunit beta	89.824	38.56	1	14	16	26	721	75.6133	6.31592
A594_1_04901	hypothetical protein	89.7991	38.77	1	15	15	26	583	63.5783	5.24951
A594_1_06666	1-deoxy-D-xylulose-5-phosphate synthase	89.55	39.74	1	12	12	24	463	49.2449	4.81787
A594_1_03844	hypothetical protein	88.7505	42.38	1	16	16	26	597	66.6832	5.63037
A594_1_06979	hypothetical protein	87.7492	45.56	1	15	15	28	439	47.747	5.64307
A594_1_02769	hypothetical protein	87.5892	45.67	1	8	8	23	289	30.379	5.24951
A594_1_02103	2-succinyl-6-hydroxy-2,4-cyclohexadiene-1-carboxylate synthase	87.1966	47.15	1	10	10	23	333	36.3695	6.80029
A594_1_02251	Fumarate hydratase class II	87.0617	40.47	1	10	10	22	467	49.6333	6.29053
A594_1_01456	Leu/Ile/Val-binding protein	87.0221	48.45	1	12	12	23	419	42.771	5.61768
A594_1_03727	Non-heme chloroperoxidase	86.5291	65.59	1	10	10	26	279	30.3732	7.00537
A594_1_01565	hypothetical protein	86.1815	27.45	1	11	11	27	499	52.3452	4.76709
A594_1_03006	putative ABC transporter-binding protein	85.6506	50.82	1	9	11	26	425	45.7782	5.52881
A594_1_07145	hypothetical protein	85.1576	31.28	1	15	15	25	553	59.7747	5.59229
A594_1_06956	L-cystine-binding protein FliY	85.0233	70.55	1	14	14	25	275	29.0861	5.26221
A594_1_06908	Putative ABC transporter substrate-binding protein YesO	84.8149	48.52	1	12	12	22	406	43.894	4.97021
A594_1_06399	Catalase-peroxidase	84.7674	34.07	1	15	15	23	725	79.0888	5.85889
A594_1_05409	hypothetical protein	84.6478	52.25	1	12	12	23	356	38.9509	5.79541
A594_1_07425	Ketol-acid reductoisomerase (NADP(+))	84.3444	38.64	1	12	12	25	339	37.1068	6.26514
A594_1_07628	hypothetical protein	82.8322	48	1	10	10	21	325	34.6183	5.5415
A594_1_01247	Tungstate-binding protein TupA	82.3843	64.23	1	13	13	24	274	28.9709	6.56592
A594_1_00819	Oligopeptide-binding protein AppA	82.1239	28.22	1	9	10	22	528	56.7598	5.78271
A594_1_03130	hypothetical protein	81.7237	23.36	1	16	16	23	1263	133.798	5.59229
A594_1_04050	S-adenosylmethionine synthase	81.581	51.8	1	16	16	25	388	41.6329	5.56689
A594_1_06749	putative protein	81.4681	54.62	1	12	12	23	357	39.0234	5.84619
A594_1_07616	Thiosulfate-binding protein	81.4058	58.61	1	12	12	25	331	35.5162	5.93506
A594_1_01164	Ribose import binding protein RbsB	80.598	35.24	1	8	8	25	315	33.104	4.91943
A594_1_00735	Phosphomannomutase/phosphoglucomutase	80.2699	36.44	1	13	13	23	505	54.7545	5.8208
A594_1_05721	1-deoxyxylulose-5-phosphate synthase YajO	79.3227	45.69	1	10	10	22	348	38.2493	6.32861
A594_1_03717	Isoquinoline 1-oxidoreductase subunit beta	78.0951	25	1	11	11	22	732	76.1545	7.12256
A594_1_03033	3-oxoadipate enol-lactonase 2	77.5519	43.4	1	10	10	22	288	31.513	5.90967
A594_1_04680	Trigger factor	77.4871	53.61	1	17	17	25	457	50.8702	4.76709
A594_1_00034	Acetyl-coenzyme A synthetase	77.349	29.68	1	14	14	23	647	71.364	6.34131
A594_1_00826	putative D,D-dipeptide-binding periplasmic protein DdpA	77.1068	29.4	1	9	9	22	500	54.2322	5.32568
A594_1_07606	Tn3 family transposase TnXax1	75.9019	47.38	1	13	13	22	401	43.0471	8.32373
A594_1_04109	D-threitol-binding protein	75.6061	46.24	1	10	10	19	346	36.5856	5.5542
A594_1_00597	putative D,D-dipeptide-binding periplasmic protein DdpA	75.5383	29.87	1	10	10	22	529	58.0227	5.77002
A594_1_00624	hypothetical protein	75.3816	58.02	1	12	12	23	324	35.1516	5.35107
A594_1_04135	hypothetical protein	75.3051	27.04	1	10	10	19	710	72.6914	5.08447
A594_1_04165	Glutathione-binding protein GsiB	75.1184	29.6	1	11	11	22	500	54.7122	5.65576
A594_1_00513	DNA-directed RNA polymerase subunit alpha	74.8518	53.24	1	15	15	24	340	37.6886	5.021
A594_1_07255	hypothetical protein	74.7026	63.57	1	14	14	22	280	29.374	5.41455
A594_1_04402	Purine-binding protein	74.7004	50	1	12	12	23	330	35.4042	6.07471
A594_1_01005	Glucans biosynthesis protein G	74.3592	27.94	1	12	12	22	519	58.0372	5.5542
A594_1_00854	putative protein	73.7687	32.17	1	9	9	22	373	38.9251	5.99854
A594_1_05832	Elongation factor Ts	73.6662	63.64	1	12	12	21	308	31.9889	5.60498
A594_1_05427	L-cystine-binding protein FliY	73.3896	44.04	1	9	9	22	277	30.4344	4.98291
A594_1_03769	hypothetical protein	72.9458	46.6	1	5	5	20	103	11.2586	5.41455
A594_1_06664	Dihydrolipoyl dehydrogenase	72.3391	35.7	1	9	9	22	465	49.3919	7.2251
A594_1_01603	hypothetical protein	72.0174	67.88	1	10	10	20	165	18.3234	8.47021
A594_1_03302	hypothetical protein	71.7834	32.8	1	15	15	23	683	72.953	5.08447
A594_1_02592	putative ABC transporter-binding protein	71.7235	58.48	1	13	13	21	407	42.9516	5.30029
A594_1_00619	hypothetical protein	71.4033	46.17	1	10	10	20	366	39.9383	5.92236
A594_1_06669	Enolase	71.3964	37.32	1	12	12	21	426	44.8768	4.90674
A594_1_05847	Citrate synthase	71.1821	57.08	1	14	14	21	438	48.8155	6.48096
A594_1_00405	putative protein	70.7942	50.13	1	13	13	22	379	41.2621	5.04639
A594_1_05564	hypothetical protein	70.6903	29.53	1	12	12	20	674	72.1921	5.09717
A594_1_07096	Intermembrane phospholipid transport system binding protein MlaC	70.5151	55.61	1	7	7	21	205	22.3728	9.59814
A594_1_02411	Riboflavin-binding protein RibY	70.2747	49.11	1	12	12	21	338	36.7174	5.07178
A594_1_02856	hypothetical protein	70.2527	38.95	1	14	14	19	552	62.3521	5.2749
A594_1_00615	hypothetical protein	70.0955	44.92	1	11	11	22	354	37.264	5.19873
A594_1_01683	hypothetical protein	70.0591	57.31	1	9	9	18	260	27.2413	5.5415
A594_1_04236	30S ribosomal protein S1	69.9763	34.61	1	14	14	22	575	62.8547	5.18604
A594_1_02455	hypothetical protein	69.7065	33.77	1	12	13	23	539	59.0994	5.74463
A594_1_03840	Periplasmic dipeptide transport protein	69.326	41.8	1	13	13	21	500	53.1345	5.36377
A594_1_07868	60 kDa chaperonin 1	69.1667	18.11	2	5	8	21	541	57.4234	5.26221
A594_1_04891	hypothetical protein	69.1404	63.13	1	7	7	19	160	17.0638	6.37939
A594_1_04425	NADP-dependent malic enzyme	68.5957	33.93	1	15	15	20	778	83.3361	5.69385
A594_1_04208	hypothetical protein	67.6713	54.76	1	14	14	21	389	41.0546	7.15186
A594_1_01232	hypothetical protein	67.1584	37.18	1	13	13	22	476	50.4678	5.33838
A594_1_07113	hypothetical protein	67.0979	62.86	1	7	7	19	140	15.0017	6.07471
A594_1_03028	hypothetical protein	66.5782	49.81	1	9	9	19	261	28.4794	5.52881
A594_1_02828	hypothetical protein	66.5579	40.99	1	11	11	20	383	42.2347	6.93213
A594_1_06704	Thiamine-binding periplasmic protein	66.1761	41.14	1	10	10	20	333	36.1495	5.07178
A594_1_01968	hypothetical protein	65.722	34.84	1	8	8	17	419	44.9537	5.22412
A594_1_02729	putative glycine dehydrogenase (decarboxylating) subunit 1	65.547	22.1	1	5	5	19	448	47.8575	6.06201
A594_1_03200	Glyceraldehyde-3-phosphate dehydrogenase	65.497	38.81	1	9	9	18	335	36.1767	7.10791
A594_1_07469	2,3,4,5-tetrahydropyridine-2,6-dicarboxylate N-succinyltransferase	65.1426	46.43	1	9	9	20	280	29.4353	6.1001
A594_1_08012	Protein-methionine-sulfoxide reductase catalytic subunit MsrP	65.0244	35.18	1	1	9	20	415	44.7859	7.44482
A594_1_02329	Esterase TesA	64.937	66.67	1	6	6	18	183	18.8218	5.021
A594_1_04673	3-hydroxylaminophenol mutase	64.934	34.47	1	11	11	19	470	51.9146	5.51611
A594_1_07286	6-phosphogluconate dehydrogenase, NADP(+)-dependent, decarboxylating	64.9123	49.26	1	15	15	21	475	50.008	6.55127
A594_1_00098	hypothetical protein	64.9073	39	1	10	10	20	400	42.2424	6.62451
A594_1_03484	hypothetical protein	64.5596	50	1	6	6	19	178	18.5244	9.71533
A594_1_02419	Chaperedoxin	64.5454	58.36	1	12	12	18	305	32.7339	5.16064
A594_1_00561	Aspartate--tRNA ligase	63.9464	26.88	1	11	11	21	599	66.4629	5.66846
A594_1_06565	Protein-methionine-sulfoxide reductase catalytic subunit MsrP	63.695	35.18	1	1	9	20	415	44.8288	6.58057
A594_1_00919	hypothetical protein	63.6128	38.37	1	9	9	18	404	43.6767	5.05908
A594_1_03974	Periplasmic alpha-galactoside-binding protein	63.5867	26.94	1	11	14	20	631	70.4354	5.94775
A594_1_00446	Lipoprotein E	63.4428	47.5	1	10	10	19	280	30.3912	5.17334
A594_1_07192	hypothetical protein	63.35	45.25	2	11	11	20	263	27.8953	5.49072
A594_1_02054	hypothetical protein	63.3201	41.67	1	10	10	18	348	37.319	5.47803
A594_1_05918	Oligopeptidase A	63.124	24.72	1	14	14	20	716	80.5844	5.5542
A594_1_02164	ATP synthase subunit alpha	63.0705	34.97	1	14	14	20	509	55.0038	5.52881
A594_1_03190	Periplasmic oligopeptide-binding protein	62.6316	44.05	1	15	15	19	529	58.6177	5.73193
A594_1_07278	Glutathione-binding protein GsiB	61.9884	32.56	1	9	9	18	516	55.0242	5.38916
A594_1_02021	putative protein	61.6406	51.38	1	10	10	15	325	33.6712	5.14795
A594_1_01762	Glucose-6-phosphate isomerase	61.5804	34.8	1	12	12	18	546	60.0986	6.26514
A594_1_06698	hypothetical protein	61.5682	32.23	1	10	10	17	422	46.564	5.21143
A594_1_01012	L-cystine-binding protein FliY	60.8237	57.4	1	10	10	17	277	29.5283	5.36377
A594_1_06681	hypothetical protein	60.5262	28.8	1	14	14	20	677	75.0777	5.30029
A594_1_00646	hypothetical protein	60.2008	33.66	1	9	9	16	404	44.4015	5.89697
A594_1_02442	hypothetical protein	60.0193	30.49	1	11	11	17	551	59.9296	5.49072
A594_1_00655	hypothetical protein	59.7195	31.03	1	10	10	18	477	51.0664	5.36377
A594_1_07961	hypothetical protein	59.5729	24.89	1	11	11	17	691	74.3025	5.85889
A594_1_02663	hypothetical protein	59.5432	22.48	1	9	9	18	654	70.1885	5.96045
A594_1_07053	Isoquinoline 1-oxidoreductase subunit beta	59.4971	27.55	1	10	12	20	715	75.1903	6.68311
A594_1_03533	ABC transporter arginine-binding protein 1	59.2397	39.54	1	8	8	17	263	27.8602	5.31299
A594_1_02890	Glycine betaine-binding protein YehZ	58.9972	40.13	1	9	9	17	309	32.4889	4.95752
A594_1_01242	Transaldolase	58.6981	46.09	1	9	9	16	230	24.2919	7.34229
A594_1_04303	DNA protection during starvation protein	58.6802	67.24	1	7	7	16	174	19.5646	5.74463
A594_1_03290	Adenylosuccinate synthetase	58.5813	38.6	1	12	12	18	430	45.9952	6.22705
A594_1_07038	Lipoprotein LipO	58.3951	33.89	1	11	11	19	481	53.4111	5.16064
A594_1_03223	D-3-phosphoglycerate dehydrogenase	58.1178	39.43	1	15	15	21	525	55.6056	5.69385
A594_1_02747	hypothetical protein	57.8492	53.59	1	6	6	18	153	16.1941	7.21045
A594_1_05646	hypothetical protein	57.7683	30.17	1	8	8	16	348	38.2033	5.05908
A594_1_06667	Acetoin:2,6-dichlorophenolindophenol oxidoreductase subunit alpha	57.7406	37.54	1	11	11	19	341	36.9983	6.81494
A594_1_00158	hypothetical protein	57.5123	52.24	1	6	6	18	201	20.7457	6.32861
A594_1_06325	Autoinducer 2-binding protein LsrB	57.0795	43.48	1	10	10	18	368	38.2837	5.32568
A594_1_04819	Leu/Ile/Val-binding protein	56.998	39.49	1	9	9	16	390	41.9684	5.51611
A594_1_05263	Branched-chain-amino-acid aminotransferase	56.5019	44.44	1	10	10	18	297	32.8396	7.34229
A594_1_03217	Cell division coordinator CpoB	56.4745	23.97	1	6	6	21	267	27.982	5.2876
A594_1_02728	putative glycine dehydrogenase (decarboxylating) subunit 2	56.3497	39.57	1	10	10	16	508	54.4255	6.85889
A594_1_04668	Spermidine-binding periplasmic protein SpuE	56.2025	39.83	1	8	9	17	349	38.4771	5.49072
A594_1_07181	hypothetical protein	56.1297	53.64	1	12	12	18	330	35.0217	9.26123
A594_1_02357	hypothetical protein	55.9437	26.36	1	6	6	17	349	35.7999	6.15088
A594_1_04038	Peroxiredoxin	55.8923	54.95	2	9	9	16	222	24.3996	5.93506
A594_1_03420	hypothetical protein	55.7628	36.77	1	8	8	16	310	33.3188	5.35107
A594_1_03143	Kynurenine formamidase	55.5285	54.09	1	8	8	15	257	28.3832	6.1001
A594_1_05463	hypothetical protein	55.447	19.2	1	9	9	17	672	72.4891	4.98291
A594_1_05545	hypothetical protein	55.177	69.62	1	7	7	16	158	17.1185	6.16357
A594_1_01027	hypothetical protein	55.0082	65.57	1	9	9	17	212	22.045	9.0708
A594_1_01148	hypothetical protein	54.9922	32.84	1	8	8	16	335	34.6012	5.2749
A594_1_06014	Threonine--tRNA ligase	54.7231	25.04	1	12	12	17	671	75.0594	6.16357
A594_1_02424	hypothetical protein	54.2176	36.47	1	10	10	15	414	44.8036	6.66846
A594_1_04579	Aminopeptidase N	54.1593	19.75	1	11	11	16	881	96.6245	5.45264
A594_1_06398	putative protein	53.5278	52.01	1	10	10	16	348	37.4678	5.21143
A594_1_05900	3-succinoylsemialdehyde-pyridine dehydrogenase	53.2753	41.6	1	11	11	16	476	50.8872	5.32568
A594_1_07168	Oligopeptide-binding protein AppA	53.1824	32.74	1	9	9	14	559	61.8694	5.49072
A594_1_06342	hypothetical protein	52.9644	56.13	1	7	7	16	155	16.86	8.48486
A594_1_06155	Oligopeptide-binding protein AppA	52.6894	25.69	1	10	10	15	510	56.3096	5.42725
A594_1_03619	Fructose-1,6-bisphosphatase class 2	52.4262	44.74	1	12	12	16	333	35.2003	5.84619
A594_1_00632	Haloalkane dehalogenase	52.2519	33.43	1	7	7	14	344	37.3401	5.85889
A594_1_06900	hypothetical protein	52.1193	32.3	1	8	8	12	452	48.6033	6.20166
A594_1_01193	hypothetical protein	51.9711	35.17	1	5	5	15	327	33.9146	5.31299
A594_1_03566	hypothetical protein	51.9083	40.04	1	9	9	16	457	49.9313	5.75732
A594_1_00945	hypothetical protein	51.5879	28.04	1	7	7	15	378	41.2026	6.37939
A594_1_00313	Histidine-binding periplasmic protein	51.5463	45.9	1	8	8	15	268	28.7497	5.47803
A594_1_03630	Cyclohexadienyl dehydratase	51.4424	42.41	1	8	8	16	257	27.9174	5.52881
A594_1_03253	hypothetical protein	51.4332	40	1	6	6	12	245	24.9893	5.09717
A594_1_00472	Ribose import binding protein RbsB	51.2165	54.75	1	12	12	16	316	33.8279	5.65576
A594_1_01890	hypothetical protein	51.1394	67.53	1	8	8	16	154	16.0416	6.11279
A594_1_06888	hypothetical protein	50.7281	41.94	1	9	9	14	422	44.5029	5.93506
A594_1_01532	hypothetical protein	50.6255	41.21	1	8	8	14	313	33.8831	5.2749
A594_1_05739	Biotin carboxylase	50.5752	34.83	1	10	10	16	445	48.4666	5.69385
A594_1_00509	Periplasmic serine endoprotease DegP	50.2144	25.7	1	9	9	14	467	48.6465	5.17334
A594_1_07933	hypothetical protein	50.1869	60.14	1	5	5	15	138	14.5195	6.52197
A594_1_02230	putative ABC transporter-binding protein	50.0193	33.81	1	8	8	14	420	44.5136	5.41455
A594_1_04634	hypothetical protein	49.66	53.21	1	9	9	15	312	33.5698	5.04639
A594_1_03711	Succinate--CoA ligase [ADP-forming] subunit alpha	49.4581	31.13	2	7	7	14	257	25.8324	6.03662
A594_1_04527	Carbamoyl-phosphate synthase large chain	49.4562	15.79	1	13	13	15	1083	116.857	5.12256
A594_1_05911	Glucose-6-phosphate 1-dehydrogenase	49.3307	33.74	1	9	10	16	492	54.5781	5.99854
A594_1_01857	cytosol aminopeptidase	49.0634	42.52	1	13	13	16	461	48.554	5.57959
A594_1_06448	hypothetical protein	49.0472	34.42	1	10	10	17	337	36.3766	5.5542
A594_1_05823	hypothetical protein	48.8657	21.31	1	12	12	16	929	98.7537	5.90967
A594_1_07931	Glutathione-binding protein GsiB	48.7149	20.95	1	7	7	15	549	60.2579	5.13525
A594_1_06455	Succinyl-diaminopimelate desuccinylase	48.5392	43.38	1	13	13	16	461	49.604	5.37646
A594_1_04869	hypothetical protein	48.3285	49.28	1	9	9	14	276	29.3312	9.12939
A594_1_04203	4-hydroxyphenylpyruvate dioxygenase	48.2409	46.92	1	11	11	16	373	41.3337	5.22412
A594_1_02366	2-succinyl-6-hydroxy-2,4-cyclohexadiene-1-carboxylate synthase	47.9846	39.58	1	7	7	14	288	30.6328	5.21143
A594_1_00043	Ureidoglycolate lyase	47.8578	45.71	1	7	7	14	280	29.9392	6.15088
A594_1_04275	Oligopeptide-binding protein OppA	47.6004	25.44	1	11	11	15	515	56.0045	5.36377
A594_1_07391	Periplasmic oligopeptide-binding protein	47.5695	22.61	1	10	10	14	597	66.0994	5.26221
A594_1_01231	2,3-bisphosphoglycerate-independent phosphoglycerate mutase	47.4889	26.06	1	8	8	14	518	55.0488	5.23682
A594_1_04892	L-glyceraldehyde 3-phosphate reductase	47.4342	39.83	1	10	10	14	349	38.2925	6.56592
A594_1_06808	3-oxoacyl-[acyl-carrier-protein] synthase 2	47.0666	20	1	5	5	12	420	43.514	5.80811
A594_1_00032	hypothetical protein	46.9802	37.4	1	9	9	15	369	38.5706	5.43994
A594_1_05056	hypothetical protein	46.8791	41.13	2	9	9	14	282	31.1542	5.75732
A594_1_07771	hypothetical protein	46.4874	31.49	1	9	9	13	416	44.4246	5.13525
A594_1_07976	hypothetical protein	45.9832	41.36	1	9	9	15	324	32.8074	6.06201
A594_1_05863	Triosephosphate isomerase	45.9211	45.42	1	6	6	12	251	25.6863	5.73193
A594_1_05885	Putative ABC transporter substrate-binding protein YesO	45.691	45.14	1	11	11	13	432	45.5623	7.03467
A594_1_00202	Phosphate-import protein PhnD	45.523	29.17	1	7	7	14	312	33.862	5.43994
A594_1_06540	hypothetical protein	45.3473	60.38	1	6	6	13	159	16.3574	5.32568
A594_1_02175	50S ribosomal protein L25	45.2125	49.07	1	8	8	13	216	22.712	6.01123
A594_1_05862	Peptidyl-prolyl cis-trans isomerase D	44.5793	26.14	1	10	10	13	635	67.9651	5.24951
A594_1_01001	hypothetical protein	44.5312	47.21	1	9	9	14	197	21.7771	5.5415
A594_1_00317	Periplasmic alpha-galactoside-binding protein	44.2204	18.9	1	7	10	14	635	70.4421	5.43994
A594_1_02947	hypothetical protein	44.1673	20.69	1	12	12	15	662	74.0981	5.42725
A594_1_02631	6,7-dimethyl-8-ribityllumazine synthase 2	44.1122	54.82	1	5	5	13	166	18.0214	6.63916
A594_1_06127	ABC transporter glutamine-binding protein GlnH	43.9712	30.71	1	6	6	11	280	30.6933	5.22412
A594_1_06103	Putative 3-oxopropanoate dehydrogenase	43.9028	27.77	1	10	10	14	497	52.915	6.75635
A594_1_00626	Beta-lactamase Toho-1	43.8728	27.65	1	5	5	11	293	30.6092	9.42236
A594_1_01049	Beta sliding clamp	43.8631	26.79	1	8	8	13	377	40.7112	5.09717
A594_1_02471	Putative aliphatic sulfonates-binding protein	43.755	46.99	1	9	9	13	332	34.523	5.8208
A594_1_05421	putative D,D-dipeptide-binding periplasmic protein DdpA	43.5468	19.73	1	6	6	12	527	57.2133	6.03662
A594_1_00576	hypothetical protein	43.3585	26.07	1	7	7	13	326	34.9847	6.43018
A594_1_04298	Putative 3-oxopropanoate dehydrogenase	43.1223	26.25	1	8	8	12	499	53.7785	6.771
A594_1_03527	hypothetical protein	42.748	32.5	1	8	8	13	440	47.9432	4.95752
A594_1_01580	hypothetical protein	41.8499	21.64	1	6	6	11	476	49.2481	4.25928
A594_1_05289	hypothetical protein	41.7946	19.19	1	9	9	13	615	68.8979	5.70654
A594_1_02987	Valine--tRNA ligase	41.7155	19.3	1	10	10	13	881	99.4469	5.5542
A594_1_01114	Spermidine-binding periplasmic protein SpuE	41.5274	34.06	1	8	8	11	367	40.0713	5.04639
A594_1_00307	hypothetical protein	41.1284	43.69	1	6	7	10	293	31.7124	5.10986
A594_1_03148	Urocanate hydratase	41.1009	23.62	1	8	8	13	563	61.3896	6.29053
A594_1_07635	Cysteine desulfurase	41.0061	33.33	1	8	8	12	417	45.0085	6.37939
A594_1_03141	hypothetical protein	40.9826	32.66	1	5	5	11	297	28.5571	4.10693
A594_1_03738	hypothetical protein	40.9305	19.31	1	3	3	12	145	15.2551	6.13818
A594_1_05892	Acetyl esterase	40.898	33.43	1	7	7	12	344	37.0022	6.17627
A594_1_01457	hypothetical protein	40.8418	31.86	1	6	6	12	295	32.1404	6.56592
A594_1_07013	Glycine--tRNA ligase beta subunit	40.7671	20.14	1	11	11	13	700	76.213	5.68115
A594_1_02088	Arginine biosynthesis bifunctional protein ArgJ	40.7527	32.13	1	9	9	13	414	42.1928	6.01123
A594_1_05972	Hemin-binding periplasmic protein HmuT	40.7405	41.44	1	7	7	12	292	29.6649	5.66846
A594_1_06929	Cyclodextrin-binding protein	40.7381	37.86	1	10	10	11	412	44.7397	5.05908
A594_1_05834	Ribosome-recycling factor	40.6002	28.11	1	5	5	12	185	20.4578	6.82959
A594_1_00993	Acetolactate synthase isozyme 2 large subunit	40.5446	21.4	1	8	8	13	556	59.8025	5.97314
A594_1_00281	Acetyl-CoA acetyltransferase	40.3471	37.78	2	9	9	11	397	41.1251	7.04932
A594_1_03713	Dihydrolipoyllysine-residue succinyltransferase component of 2-oxoglutarate dehydrogenase complex	40.1872	23.26	1	6	6	11	417	43.5597	6.13818
A594_1_06848	Ribose import binding protein RbsB	39.6624	30.38	1	8	8	11	316	33.0546	5.30029
A594_1_02275	D-beta-hydroxybutyrate dehydrogenase	39.6345	27.31	2	4	4	11	260	26.6089	6.39209
A594_1_01425	hypothetical protein	39.5915	37.5	1	8	8	12	368	39.8223	5.10986
A594_1_02311	Alpha-ketoglutaric semialdehyde dehydrogenase	39.5496	34.66	1	9	9	11	479	51.1372	6.16357
A594_1_04825	hypothetical protein	39.4807	31.67	1	7	7	12	341	36.1932	6.44287
A594_1_07906	Aminopeptidase	39.464	27.26	1	6	6	10	532	55.8015	6.37939
A594_1_03996	Carboxymethylenebutenolidase	39.3351	43.29	1	6	6	12	231	24.4632	5.13525
A594_1_00601	putative D,D-dipeptide-binding periplasmic protein DdpA	39.3085	25.57	1	8	8	11	528	57.0482	5.68115
A594_1_00099	hypothetical protein	39.2087	38.36	1	7	7	12	305	33.3041	5.69385
A594_1_07445	Alanine dehydrogenase	39.1648	45.58	1	10	10	11	373	39.4655	6.80029
A594_1_01387	ABC transporter arginine-binding protein 1	39.0222	31.32	1	6	6	11	265	28.6491	6.60986
A594_1_02262	N5-carboxyaminoimidazole ribonucleotide synthase	38.955	18.28	1	4	4	11	361	38.4946	6.18896
A594_1_04614	Serine hydroxymethyltransferase 2	38.8805	31.42	1	9	9	12	436	46.5329	7.13721
A594_1_00709	hypothetical protein	38.716	31.38	1	10	10	13	427	44.8725	7.50342
A594_1_00981	hypothetical protein	38.7083	26.09	1	6	6	12	345	37.4189	5.03369
A594_1_03419	hypothetical protein	38.6513	44.41	1	9	9	13	295	30.717	5.05908
A594_1_07665	Fructose-bisphosphate aldolase class 1	38.6132	34.63	1	7	7	11	309	33.2343	7.10791
A594_1_01528	Branched-chain-amino-acid aminotransferase	38.5124	36.07	1	6	6	10	280	30.6773	6.07471
A594_1_04157	Lactose-binding protein	38.4562	28.9	1	9	9	12	436	46.1923	5.0083
A594_1_01561	Chaperone protein HtpG	38.3503	23.83	1	10	10	12	621	68.6905	5.36377
A594_1_05244	Fructose import binding protein FrcB	38.3159	35.01	1	8	8	11	337	34.634	7.89893
A594_1_02879	5-aminovalerate aminotransferase DavT	38.107	27	1	8	8	11	426	45.1196	6.46826
A594_1_04083	hypothetical protein	38.012	34.81	1	5	5	10	181	18.3766	5.22412
A594_1_01365	putative ABC transporter-binding protein	37.9315	21.95	1	6	6	12	442	47.2363	5.65576
A594_1_03887	Electron transfer flavoprotein subunit beta	37.6505	34.54	1	8	8	13	249	26.5737	9.29053
A594_1_03393	hypothetical protein	37.6189	30.16	1	9	9	12	431	46.5564	5.09717
A594_1_05018	hypothetical protein	37.4727	36.6	1	5	5	11	153	16.3631	4.31006
A594_1_07898	Inosine-5'-monophosphate dehydrogenase	37.2042	47.7	1	5	8	11	239	26.7614	5.46533
A594_1_01439	hypothetical protein	37.0791	39.39	1	9	9	11	396	41.7973	5.74463
A594_1_07432	Periplasmic serine endoprotease DegP	36.7868	30.59	1	8	8	10	510	53.4219	5.23682
A594_1_07109	2-methylisocitrate lyase	36.31	24.82	1	10	10	11	560	60.9733	5.19873
A594_1_03827	ADP-L-glycero-D-manno-heptose-6-epimerase	36.2777	29.45	1	6	6	10	326	36.071	7.48877
A594_1_02476	Lactose-binding protein	36.0115	31.54	1	9	9	11	428	45.8034	6.41748
A594_1_00534	Glutamyl-tRNA(Gln) amidotransferase subunit A	36.0025	22	1	8	8	11	491	52.2755	5.56689
A594_1_02354	hypothetical protein	35.9974	52.83	1	6	6	13	159	17.2219	7.81104
A594_1_00063	3-ketoacyl-CoA thiolase	35.9002	33.25	1	7	7	10	379	39.1651	5.99854
A594_1_05944	Energy-dependent translational throttle protein EttA	35.8341	19.57	1	7	7	10	557	61.5806	5.35107
A594_1_01010	Putative ABC transporter substrate-binding protein YesO	35.3961	29.44	1	7	7	10	428	46.5187	6.65381
A594_1_03763	Thioredoxin/glutathione peroxidase BtuE	35.2622	56.98	1	6	6	10	179	19.0228	5.87158
A594_1_08178	hypothetical protein	35.0584	56.87	1	6	7	11	211	21.4583	9.27588
A594_1_03282	Low specificity L-threonine aldolase	35.0545	27.84	1	7	7	10	352	36.7968	6.22705
A594_1_01506	10 kDa chaperonin	35.0205	59.22	1	5	6	12	103	11.2411	8.42627
A594_1_03744	Outer-membrane lipoprotein carrier protein	34.9701	37.5	1	6	6	9	208	23.037	8.32373
A594_1_01686	2-hydroxy-3-oxopropionate reductase	34.8404	39.37	1	7	7	10	287	29.7959	5.64307
A594_1_07491	Homogentisate 1,2-dioxygenase	34.8309	42.66	1	9	9	11	429	47.7637	6.0874
A594_1_05146	hypothetical protein	34.6158	35.71	1	3	3	9	112	11.372	6.25244
A594_1_00913	D-threitol-binding protein	34.5678	35.29	1	8	8	12	340	36.0553	5.21143
A594_1_01665	Inorganic pyrophosphatase	34.3916	50	1	6	6	10	182	20.1913	5.2749
A594_1_04335	D-threitol-binding protein	34.321	23.63	1	6	6	12	364	38.5318	5.97314
A594_1_05969	hypothetical protein	34.3099	56.08	1	6	6	9	148	15.416	7.75244
A594_1_06792	Nucleoside diphosphate kinase	34.0262	25.18	1	3	3	10	139	14.9786	5.96045
A594_1_01689	hypothetical protein	33.8997	48.37	1	7	7	10	215	23.1806	6.72705
A594_1_04035	Tn3 family transposase TnXax1	33.7954	33.17	1	8	8	9	419	44.1873	5.41455
A594_1_02027	ABC transporter periplasmic-binding protein YtfQ	33.7404	26.01	1	6	6	10	323	35.1424	5.78271
A594_1_00997	hypothetical protein	33.5743	15.59	1	7	7	10	648	73.8975	5.87158
A594_1_06122	hypothetical protein	33.5145	55.2	1	4	4	9	125	13.3032	7.41553
A594_1_05932	Inositol-1-monophosphatase	33.4783	39.85	1	6	6	10	261	27.4892	6.01123
A594_1_03067	Cysteine synthase	33.4466	31.58	1	6	6	9	342	36.3838	5.94775
A594_1_04804	Dipeptidyl carboxypeptidase	33.4231	20.03	1	9	9	12	684	76.0817	5.77002
A594_1_05435	Periplasmic alpha-galactoside-binding protein	33.2149	17.36	1	8	8	10	651	72.5939	6.25244
A594_1_04718	hypothetical protein	33.1571	26.35	1	8	8	10	425	46.3915	5.30029
A594_1_03120	5'-nucleotidase SurE	33.1232	50.4	1	8	8	10	252	27.4691	6.02393
A594_1_00527	Aspartyl/glutamyl-tRNA(Asn/Gln) amidotransferase subunit B	33.1074	24.17	1	10	10	12	484	52.7017	5.09717
A594_1_02690	3-isopropylmalate dehydrogenase	33.0912	30.46	1	7	7	9	371	39.5893	5.17334
A594_1_01957	putative oxidoreductase	33.0812	25.58	1	4	4	8	258	25.9057	6.55127
A594_1_02134	Organic hydroperoxide resistance protein OhrA	32.9277	51.43	1	4	4	10	140	14.2693	5.92236
A594_1_00436	hypothetical protein	32.8592	13.46	1	5	5	10	379	41.9287	4.99561
A594_1_06417	Glutaredoxin 4	32.6469	64.29	1	6	6	11	112	12.1632	4.93213
A594_1_07271	hypothetical protein	32.5986	23.99	1	9	9	10	446	47.7465	5.35107
A594_1_05874	Argininosuccinate lyase	32.5749	18.45	1	7	7	11	515	55.7047	6.15088
A594_1_00734	DNA-binding protein HU-beta	32.4749	60.44	1	4	4	9	91	9.88439	10.6382
A594_1_04047	Transcription termination/antitermination protein NusA	32.4646	25.15	1	9	9	10	497	55.8059	4.86865
A594_1_07646	Glutathione hydrolase proenzyme	32.3958	24.62	1	9	9	10	589	61.1849	5.45264
A594_1_02641	Phosphoribosylamine--glycine ligase	32.3528	24.11	1	6	6	9	419	43.5863	4.94482
A594_1_03119	Serine--tRNA ligase	32.3526	22.88	1	5	5	9	424	46.4627	6.04932
A594_1_04878	putative protein	32.2834	42.75	1	5	5	8	269	27.6045	5.32568
A594_1_02730	Glycine cleavage system H protein	32.1985	46.4	1	4	4	9	125	13.5138	4.41162
A594_1_01219	Pyruvate kinase	32.0191	23.59	1	7	7	10	479	51.776	6.41748
A594_1_05008	hypothetical protein	32.0109	33.18	1	7	7	10	220	23.8626	6.11279
A594_1_00736	Cellobiose 2-epimerase	31.9709	17.04	1	6	6	10	405	43.6775	5.60498
A594_1_02618	Metalloprotease TldD	31.7893	21.8	1	6	6	9	477	49.9734	5.38916
A594_1_03479	Disulfide-bond oxidoreductase YghU	31.6227	26.64	1	4	4	8	289	31.9192	7.26904
A594_1_02742	Hybrid peroxiredoxin hyPrx5	31.6169	63.13	1	6	6	10	160	16.7436	5.97314
A594_1_05783	6-hydroxypseudooxynicotine dehydrogenase complex subunit gamma	31.4631	12.61	1	7	7	10	785	82.9209	5.5415
A594_1_04013	Protein-export protein SecB	31.4148	40	1	5	5	10	165	17.9564	4.94482
A594_1_01806	hypothetical protein	31.3855	13.59	1	6	6	7	743	80.4384	5.05908
A594_1_03650	O-acetyl-L-homoserine sulfhydrylase	31.3414	25.23	1	7	7	10	432	45.9976	6.06201
A594_1_03003	Single-stranded DNA-binding protein	31.127	42.08	1	5	5	7	183	18.7311	5.43994
A594_1_02953	Periplasmic dipeptide transport protein	31.0319	13.71	1	5	5	10	518	56.643	5.5542
A594_1_05922	hypothetical protein	30.957	18.47	1	6	6	10	406	42.0756	5.5415
A594_1_00275	hypothetical protein	30.7096	27.76	1	7	7	10	371	38.6344	5.2876
A594_1_00809	Glutathione-binding protein GsiB	30.379	16.42	1	7	7	9	530	59.1424	6.43018
A594_1_07141	Efflux pump periplasmic linker BepF	30.3111	23.35	1	6	6	8	394	41.902	6.40479
A594_1_05053	hypothetical protein	30.2328	33.05	1	3	6	9	239	26.5781	5.03369
A594_1_02658	hypothetical protein	30.1599	27.53	1	5	5	9	287	29.9788	10.4478
A594_1_00399	Alkyl hydroperoxide reductase C	29.9971	57.46	1	8	8	9	181	20.3493	5.03369
A594_1_02562	hypothetical protein	29.7963	43	1	6	6	9	207	20.4136	4.99561
A594_1_00689	hypothetical protein	29.7911	10.88	1	5	5	9	634	70.5516	6.34131
A594_1_07847	hypothetical protein	29.7831	16.82	1	5	5	9	440	46.6769	5.21143
A594_1_00084	putative succinyl-CoA:3-ketoacid coenzyme A transferase subunit B	29.7708	40.65	1	6	6	10	214	22.6645	4.66553
A594_1_05815	hypothetical protein	29.6161	27.68	1	4	4	8	177	19.2596	6.52197
A594_1_04779	hypothetical protein	29.5652	37.45	1	5	5	8	243	25.8409	5.63037
A594_1_00121	hypothetical protein	29.4955	71.61	1	6	6	8	155	15.8743	6.53662
A594_1_07725	Glutathione-binding protein GsiB	29.4479	13.52	1	6	6	10	525	57.2151	5.59229
A594_1_05028	hypothetical protein	29.3782	29.38	1	5	5	10	177	19.7251	6.1001
A594_1_01678	Protein GrpE	29.3312	28.71	1	6	6	10	202	21.4319	4.90674
A594_1_07350	hypothetical protein	29.1055	26.53	1	3	3	11	147	15.8553	7.29834
A594_1_04480	50S ribosomal protein L3	29.0948	27.05	1	4	4	7	244	25.7407	9.72998
A594_1_03819	L-methionine gamma-lyase	28.9988	28.21	1	7	7	9	429	45.7687	6.41748
A594_1_03747	hypothetical protein	28.9922	65.43	1	5	5	8	162	16.8349	5.41455
A594_1_03984	Leucine--tRNA ligase	28.9346	12.57	1	8	8	9	859	95.6242	5.96045
A594_1_01028	Inositol 2-dehydrogenase	28.7183	26.83	1	7	7	9	328	34.7949	5.47803
A594_1_04735	GMP synthase [glutamine-hydrolyzing]	28.626	15.08	1	6	6	9	524	57.3102	5.71924
A594_1_00061	3-methylmercaptopropionyl-CoA dehydrogenase	28.5969	13.19	1	7	7	10	599	64.4348	5.80811
A594_1_04450	2-keto-4-pentenoate hydratase	28.503	39.08	1	5	5	8	284	28.5463	5.93506
A594_1_05302	hypothetical protein	28.4143	20	1	6	6	9	375	41.2081	5.41455
A594_1_03198	hypothetical protein	28.3979	24.01	1	6	6	8	379	40.0859	5.65576
A594_1_04328	Soluble epoxide hydrolase	28.3287	24.13	1	5	5	9	315	33.6803	7.37158
A594_1_05548	hypothetical protein	28.3063	50.85	1	5	5	7	177	19.9264	5.33838
A594_1_02391	Tryptophan--tRNA ligase	28.2653	33.63	1	7	7	9	333	36.3697	6.13818
A594_1_01708	Fructose-bisphosphate aldolase class 1	28.2613	47.32	1	7	7	10	298	31.7614	5.74463
A594_1_04649	hypothetical protein	28.1134	31.18	1	5	5	8	340	36.9809	6.75635
A594_1_05484	hypothetical protein	28.0795	28.72	1	6	6	8	376	40.2864	5.40186
A594_1_03186	Acylamidase	28.0496	28.33	1	7	7	8	466	48.7772	5.93506
A594_1_04589	4-hydroxy-tetrahydrodipicolinate synthase	27.9804	29.55	1	6	6	9	291	31.3011	6.354
A594_1_03888	Electron transfer flavoprotein subunit alpha	27.8612	23.4	1	4	4	8	312	31.8158	5.17334
A594_1_06016	Fructokinase	27.7221	28.9	1	5	5	8	301	31.433	6.22705
A594_1_03361	hypothetical protein	27.7022	38.79	1	5	5	8	165	17.2549	7.31299
A594_1_01962	Taurine-binding periplasmic protein	27.4891	25.75	1	5	5	7	334	34.7455	5.40186
A594_1_06789	Phosphoribosylformylglycinamidine cyclo-ligase	27.302	20	1	4	4	8	360	36.9588	5.22412
A594_1_04665	ATP-dependent Clp protease proteolytic subunit	27.2528	36.02	1	5	5	9	211	23.4603	5.42725
A594_1_00877	hypothetical protein	27.0902	29.69	1	5	5	8	256	26.6981	6.43018
A594_1_02920	Outer membrane protein	27.0577	18.69	3	5	6	9	321	34.0688	5.021
A594_1_07609	hypothetical protein	26.8176	34.05	1	3	3	8	185	20.115	4.99561
A594_1_02675	Metalloprotease PmbA	26.7449	21.57	1	7	7	8	459	47.8414	5.64307
A594_1_02270	putative acetoacetate decarboxylase	26.6339	46.12	2	6	6	8	245	26.9991	6.21436
A594_1_00423	2-iminobutanoate/2-iminopropanoate deaminase	26.4557	32.17	1	2	2	6	115	12.2634	5.45264
A594_1_03413	Phosphoglycerate kinase	26.4551	30.73	1	8	8	9	397	41.3509	5.84619
A594_1_01562	hypothetical protein	26.3527	12.09	1	5	5	6	670	69.4351	5.14795
A594_1_05535	hypothetical protein	26.3152	59.67	1	6	6	8	181	19.829	4.70361
A594_1_03117	Beta-lactamase	26.2328	14.83	1	4	4	8	391	41.9787	9.15869
A594_1_03263	Pyrimidine-specific ribonucleoside hydrolase RihB	26.2182	32.22	1	6	6	7	360	39.5046	5.16064
A594_1_03477	Cold shock protein CspA	26.0414	60.29	1	3	3	8	68	7.27967	7.25439
A594_1_04186	NADPH dehydrogenase	25.9413	15.41	1	4	4	8	370	39.2523	7.59131
A594_1_04954	Heme-binding protein A	25.8351	17.61	1	6	6	9	511	55.0194	5.68115
A594_1_03309	hypothetical protein	25.7486	25.45	1	5	5	9	275	28.8928	5.2749
A594_1_02588	Periplasmic pH-dependent serine endoprotease DegQ	25.7367	22.38	1	5	5	7	353	35.5418	6.23975
A594_1_04683	Lon protease	25.5397	13.11	1	8	8	9	801	89.0625	6.43018
A594_1_03360	putative protein	25.5326	57.52	1	6	6	8	153	16.6791	5.32568
A594_1_02922	Putative ABC transporter substrate-binding protein YesO	25.5098	24.71	1	7	7	8	425	45.5441	6.18896
A594_1_01040	O-acetylserine sulfhydrylase	25.4983	39.81	1	7	7	8	324	34.1494	7.54736
A594_1_06754	Riboflavin-binding protein RibY	25.4759	24.31	1	6	6	8	325	34.8039	5.42725
A594_1_01880	KHG/KDPG aldolase	25.4231	42.86	1	5	5	7	210	21.1303	5.33838
A594_1_03729	Dihydrolipoyl dehydrogenase 3	25.4006	25.32	1	9	9	9	466	49.1578	6.43018
A594_1_05052	60 kDa chaperonin 1	25.1077	13.47	1	5	5	8	542	57.6066	5.38916
A594_1_01401	hypothetical protein	25.0845	19.71	1	5	5	7	411	44.7724	5.63037
A594_1_07196	Hydrazine synthase subunit beta	24.9539	22.19	1	5	5	8	320	34.2527	4.77979
A594_1_04073	Protein YhfA	24.9141	25.9	1	2	2	6	139	15.0717	6.01123
A594_1_02091	Protein translocase subunit SecA	24.9116	10.03	1	6	7	8	907	102.118	5.41455
A594_1_00902	hypothetical protein	24.8803	22.83	1	5	5	7	311	32.6333	6.30322
A594_1_05719	Putative aliphatic sulfonates-binding protein	24.7921	24.29	1	5	5	7	317	33.0264	5.49072
A594_1_06814	hypothetical protein	24.7504	39.69	1	7	7	8	194	20.7779	4.88135
A594_1_03856	N-carbamoyl-L-amino-acid hydrolase	24.5518	13.94	1	4	4	6	416	45.3819	5.37646
A594_1_04510	hypothetical protein	24.5499	22.39	1	5	5	7	335	35.4444	5.32568
A594_1_06442	Protein RecA	24.5269	12.14	1	3	3	7	346	36.6351	5.88428
A594_1_06711	Carbon monoxide dehydrogenase medium chain	24.489	35.85	1	4	4	7	265	27.0839	6.12549
A594_1_01389	Glutathione-binding protein GsiB	24.4847	14.02	1	5	5	7	528	55.9145	6.07471
A594_1_00989	DNA protection during starvation protein 2	24.3421	26.17	1	3	3	7	149	16.4624	5.56689
A594_1_07558	Glutathione hydrolase-like YwrD proenzyme	24.319	15.5	1	6	6	8	529	55.5595	6.11279
A594_1_05401	Putative ABC transporter substrate-binding protein YesO	24.2402	11.16	1	3	3	6	430	46.6306	6.66846
A594_1_02609	Thermostable carboxypeptidase 1	24.1887	17.1	1	7	7	9	497	54.9056	5.42725
A594_1_01445	hypothetical protein	24.159	23.08	1	5	5	7	325	34.8517	5.5415
A594_1_04710	Proline--tRNA ligase	24.0569	22.43	1	6	6	8	437	48.8227	5.42725
A594_1_05339	Glutathione-binding protein GsiB	23.97	19.92	1	8	8	9	497	53.7852	5.33838
A594_1_01893	5-(methylthio)ribulose-1-phosphate aldolase	23.9566	21.46	1	3	3	7	233	25.6156	6.30322
A594_1_06675	Carbon monoxide dehydrogenase large chain	23.9458	9.79	1	7	7	9	776	83.3142	5.07178
A594_1_00518	Guanidinobutyrase	23.8764	29.51	1	5	5	6	305	31.9273	5.24951
A594_1_01625	hypothetical protein	23.8689	39.23	1	4	4	7	209	21.7936	8.17725
A594_1_07605	hypothetical protein	23.8253	24.16	1	5	5	8	269	28.2297	7.13721
A594_1_05699	hypothetical protein	23.8043	36.02	1	6	6	8	186	19.268	9.14404
A594_1_04981	Bifunctional enzyme IspD/IspF	23.735	19.17	1	6	6	7	386	40.7275	6.48096
A594_1_05233	hypothetical protein	23.637	39.63	1	4	4	8	164	17.0491	10.7114
A594_1_00165	hypothetical protein	23.6068	29.59	1	8	8	8	338	36.7868	6.18896
A594_1_01866	Phenylalanine--tRNA ligase beta subunit	23.5761	11.75	1	7	7	8	800	83.8729	5.37646
A594_1_04611	Acyl-CoA dehydrogenase	23.5601	23.27	1	5	5	6	404	44.0902	6.55127
A594_1_03810	3-oxoacyl-[acyl-carrier-protein] synthase 1	23.4628	16.3	1	4	4	6	405	42.6272	6.32861
A594_1_01210	hypothetical protein	23.4364	41.46	1	5	5	9	82	9.39191	4.98291
A594_1_03074	UDP-2-acetamido-2-deoxy-3-oxo-D-glucuronate aminotransferase	23.4327	16.89	1	4	4	7	373	39.7366	5.43994
A594_1_04788	HTH-type transcriptional regulator SgrR	23.234	14.04	1	6	6	8	520	57.3951	6.41748
A594_1_05858	Indole-3-glycerol phosphate synthase	23.0346	27.84	2	6	6	8	273	29.3045	5.78271
A594_1_00559	hypothetical protein	22.8658	27.51	1	6	6	7	269	28.9192	5.14795
A594_1_01307	Alpha-2-macroglobulin	22.7678	5.94	1	6	6	7	1734	184.856	5.05908
A594_1_02286	Mannonate dehydratase	22.7626	19.49	1	6	6	7	395	42.4757	5.94775
A594_1_00726	hypothetical protein	22.6686	10.08	1	8	8	8	1012	112.043	6.37939
A594_1_05949	hypothetical protein	22.6522	42.01	1	5	5	8	169	17.9801	7.02002
A594_1_04088	5-dehydro-2-deoxygluconokinase	22.4895	29.18	1	5	5	6	329	34.2146	5.22412
A594_1_01083	putative succinyl-diaminopimelate desuccinylase	22.469	20.6	1	6	6	8	432	46.18	5.60498
A594_1_07309	Beta-lactamase hydrolase-like protein	22.3973	34.72	1	3	3	7	144	14.8877	5.2749
A594_1_01763	hypothetical protein	22.3673	27.49	1	3	3	6	211	22.2024	5.71924
A594_1_06452	hypothetical protein	22.3295	38.36	1	5	5	7	146	15.9743	8.36768
A594_1_06811	Malonyl CoA-acyl carrier protein transacylase	22.2675	32.59	1	5	5	6	316	32.2058	5.52881
A594_1_00850	putative D,D-dipeptide-binding periplasmic protein DdpA	22.0556	14.15	1	5	5	6	544	59.5495	6.18896
A594_1_00544	Acetyl-CoA:oxalate CoA-transferase	22.0405	25.69	1	5	5	6	401	43.004	5.40186
A594_1_01876	Phosphomannomutase/phosphoglucomutase	21.988	17.28	1	5	5	7	463	49.6838	5.99854
A594_1_00420	Thymidine phosphorylase	21.9756	15.03	1	4	4	7	439	44.8987	5.65576
A594_1_02540	26 kDa periplasmic immunogenic protein	21.9531	16.87	1	3	3	6	243	24.5779	5.47803
A594_1_04528	Transcription elongation factor GreA	21.8631	35.67	1	5	5	7	157	17.3128	4.79248
A594_1_06279	hypothetical protein	21.7975	28.05	1	6	6	6	328	35.3408	5.2749
A594_1_05821	Imidazolonepropionase	21.7874	17.62	1	4	4	6	403	42.7539	5.61768
A594_1_02245	Maltodextrin phosphorylase	21.7698	9.08	1	5	5	7	826	92.7175	6.20166
A594_1_06163	hypothetical protein	21.6484	9.46	2	5	5	6	793	82.7951	6.18896
A594_1_03146	Histidine ammonia-lyase	21.6445	14.79	1	6	6	8	514	53.9143	5.93506
A594_1_01836	Argininosuccinate lyase	21.4982	18.02	1	6	6	6	455	49.3471	6.43018
A594_1_04477	50S ribosomal protein L2	21.4843	22.63	1	4	4	6	274	29.8121	10.77
A594_1_04558	Aspartate/prephenate aminotransferase	21.3056	12.5	1	3	3	5	400	42.8351	6.27783
A594_1_01622	Ectoine hydrolase	21.2929	14.77	1	5	5	7	386	42.1381	5.88428
A594_1_04461	50S ribosomal protein L15	21.2896	33.92	1	3	3	6	171	17.5655	10.6089
A594_1_00869	Cyclodextrin-binding protein	21.2827	12.29	1	4	4	6	423	45.8239	4.83057
A594_1_03997	2-haloacrylate reductase	21.2729	25	1	6	6	7	324	34.0359	8.00146
A594_1_06405	hypothetical protein	21.2727	50.91	1	4	4	6	110	12.6593	5.32568
A594_1_07826	putative D,D-dipeptide-binding periplasmic protein DdpA	21.2561	16.15	1	5	5	6	520	57.4522	5.37646
A594_1_03716	Isoquinoline 1-oxidoreductase subunit alpha	21.2201	22.52	1	2	2	5	151	16.0378	5.46533
A594_1_01297	D-methionine-binding lipoprotein MetQ	21.2023	30.89	1	4	4	6	259	27.6988	5.14795
A594_1_00625	Organic hydroperoxide resistance protein OhrB	21.0788	41.13	1	4	4	6	141	14.6706	7.98682
A594_1_05220	Ribose-phosphate pyrophosphokinase	21.0674	28.39	1	5	5	7	310	33.6838	7.31299
A594_1_04898	3-keto-5-aminohexanoate cleavage enzyme	20.9237	20	1	4	4	6	310	33.8994	6.69775
A594_1_04998	hypothetical protein	20.8941	25.14	1	5	5	8	179	18.767	6.31592
A594_1_03350	L-arabonate dehydratase	20.8374	12.33	1	5	5	6	600	64.5739	6.12549
A594_1_06975	Galactitol 2-dehydrogenase	20.833	21.51	1	4	4	7	251	26.6145	6.91748
A594_1_04871	Glutamine--fructose-6-phosphate aminotransferase [isomerizing]	20.8011	15.32	1	7	7	7	607	65.1001	5.60498
A594_1_04840	4-carboxy-4-hydroxy-2-oxoadipate aldolase	20.7679	33.47	1	5	5	6	239	25.7223	6.23975
A594_1_06682	Inosine-5'-monophosphate dehydrogenase	20.7377	10.91	1	3	3	6	486	51.6281	7.82568
A594_1_02072	hypothetical protein	20.7064	39.29	1	5	5	7	196	20.6672	4.91943
A594_1_01038	Deoxyuridine 5'-triphosphate nucleotidohydrolase	20.6508	34.87	1	3	3	6	152	15.5572	6.94678
A594_1_07644	Tyrosine--tRNA ligase	20.6477	17.39	1	6	6	7	414	45.1903	5.94775
A594_1_01793	hypothetical protein	20.616	41.24	1	6	6	8	194	21.0657	4.91943
A594_1_02604	Hippurate hydrolase	20.5846	14.87	1	4	4	6	390	41.5027	5.51611
A594_1_05451	hypothetical protein	20.5341	12.8	1	4	4	5	500	56.1194	5.65576
A594_1_00758	HTH-type transcriptional regulator SgrR	20.4616	22.29	1	7	7	7	525	59.4492	5.73193
A594_1_04681	ATP-dependent Clp protease proteolytic subunit	20.4129	16.02	1	3	3	6	206	22.8687	5.43994
A594_1_04990	hypothetical protein	20.3444	30.37	1	4	4	5	191	20.4839	6.17627
A594_1_05504	putative D,D-dipeptide-binding periplasmic protein DdpA	20.3149	11.32	1	4	4	6	530	57.6529	6.34131
A594_1_06965	Phyllosphere-induced regulator PhyR	20.168	24.53	1	4	4	6	265	29.0732	5.09717
A594_1_00772	hypothetical protein	20.0806	19.43	1	4	4	6	350	36.834	5.05908
A594_1_07591	Beta-xylosidase	20.0465	8.31	1	4	4	6	710	75.4825	5.2749
A594_1_05810	hypothetical protein	19.9552	39.26	1	4	4	6	135	14.0512	6.68311
A594_1_01216	hypothetical protein	19.9252	19.35	1	4	4	6	310	33.8852	5.88428
A594_1_06665	Dihydrolipoyllysine-residue acetyltransferase component of pyruvate dehydrogenase complex	19.9185	14.51	1	5	5	7	448	46.0832	5.98584
A594_1_02541	1,2-beta-oligoglucan phosphorylase	19.9058	5.99	1	5	5	7	1086	117.485	6.20166
A594_1_01607	Acetylglutamate kinase	19.8924	15.46	1	3	3	6	304	32.0189	5.30029
A594_1_04591	hypothetical protein	19.8204	27.4	1	3	3	6	208	23.6561	5.52881
A594_1_05211	PKHD-type hydroxylase YbiX	19.7979	16.04	1	4	4	6	374	41.7634	7.85498
A594_1_04864	Bifunctional polyhydroxybutyrate synthase / ABC transporter periplasmic binding protein	19.7599	20.67	1	6	6	6	387	42.5462	5.47803
A594_1_04436	Acetyl-/propionyl-coenzyme A carboxylase alpha chain	19.734	7.52	1	3	3	6	665	71.4317	6.354
A594_1_02283	hypothetical protein	19.729	33.82	1	3	3	6	136	14.7868	7.59131
A594_1_03321	Adenylosuccinate lyase	19.6882	19.77	1	7	7	7	430	48.2021	6.53662
A594_1_02960	Lactoylglutathione lyase	19.6657	35.97	1	4	4	6	139	15.927	6.17627
A594_1_01777	Putrescine--pyruvate aminotransferase	19.6519	13.35	1	4	4	6	457	49.1473	6.53662
A594_1_01832	Phenylserine dehydratase	19.5517	26.09	1	6	6	6	322	33.3069	5.97314
A594_1_03641	50S ribosomal protein L13	19.4168	47.37	1	4	4	5	152	16.779	10.0376
A594_1_02830	hypothetical protein	19.3981	11.69	1	6	6	6	770	83.2794	7.44482
A594_1_03825	Efflux pump periplasmic linker BepF	19.3735	10.07	1	1	1	5	407	42.589	5.45264
A594_1_03222	Phosphoserine aminotransferase	19.3359	16.5	1	5	5	6	394	42.358	5.33838
A594_1_07739	hypothetical protein	19.2783	46.94	1	5	5	7	98	10.9778	4.88135
A594_1_06056	1-deoxyxylulose-5-phosphate synthase YajO	19.2697	10.12	1	2	2	5	336	36.9768	6.34131
A594_1_00062	putative 3-hydroxyacyl-CoA dehydrogenase	19.2083	8.63	1	5	5	6	776	82.5663	6.771
A594_1_00164	Glucose--fructose oxidoreductase	19.1621	14.72	1	3	3	5	360	39.0572	6.1001
A594_1_05549	hypothetical protein	19.146	15.23	1	5	5	6	499	56.2298	6.1001
A594_1_03369	Aspartate carbamoyltransferase catalytic subunit	19.0816	15.06	1	4	4	6	352	38.4789	6.31592
A594_1_03869	hypothetical protein	18.9437	28.71	1	4	4	6	209	22.2873	5.23682
A594_1_04887	Methionine--tRNA ligase	18.8106	10.83	1	4	4	5	517	57.8431	5.66846
A594_1_00714	Succinyl-diaminopimelate desuccinylase	18.7992	19.35	1	4	4	6	460	49.1844	5.59229
A594_1_01315	Tryptophan synthase alpha chain	18.7827	34.43	1	5	5	6	273	28.5491	5.71924
A594_1_03327	hypothetical protein	18.7819	14.97	1	4	4	6	354	37.8613	5.64307
A594_1_01813	putative GST-like protein YibF	18.7319	37	1	4	4	5	200	22.2595	5.85889
A594_1_05559	hypothetical protein	18.596	14.53	1	5	5	6	468	51.2512	9.20264
A594_1_06971	Citrate synthase 1	18.4885	21.88	1	6	6	6	352	36.5066	6.7417
A594_1_07586	Putative ABC transporter substrate-binding protein YesO	18.481	19.71	1	5	5	6	416	45.3182	5.38916
A594_1_06421	30S ribosomal protein S4	18.352	30.95	1	5	5	6	210	24.135	10.228
A594_1_03068	ADP-ribose pyrophosphatase	18.322	15.17	1	3	3	6	211	23.6162	4.84326
A594_1_01063	Peptide methionine sulfoxide reductase MsrA	18.2555	26.69	1	5	5	6	236	25.2408	5.24951
A594_1_07381	Maltose/maltodextrin-binding periplasmic protein	18.2431	11.86	1	4	4	6	413	45.2179	5.51611
A594_1_02602	Bifunctional ribokinase/ribose-5-phosphate isomerase A	18.2107	18.57	1	3	3	5	307	30.868	4.84326
A594_1_03897	4-hydroxy-3-methylbut-2-en-1-yl diphosphate synthase (flavodoxin)	18.1859	10.82	1	3	3	5	379	40.6329	6.46826
A594_1_05993	Ribose import binding protein RbsB	18.1033	25.88	1	4	4	5	313	32.1889	5.19873
A594_1_07522	Argininosuccinate synthase	18.0611	19.69	1	5	5	6	447	49.1908	5.66846
A594_1_00470	hypothetical protein	18.0344	11.64	1	3	3	5	481	50.629	4.4751
A594_1_07743	Xylulose-5-phosphate phosphoketolase	17.995	7.22	2	5	5	7	790	88.5555	5.98584
A594_1_04569	S-formylglutathione hydrolase FrmB	17.7904	11.03	2	2	2	5	281	30.6552	6.56592
A594_1_04693	NADH-quinone oxidoreductase chain 1	17.785	10.19	1	3	3	5	432	47.6497	6.46826
A594_1_03264	AB hydrolase superfamily protein YdjP	17.7203	22.31	1	3	3	4	260	27.8603	6.53662
A594_1_05493	hypothetical protein	17.6463	32.26	1	4	4	5	310	32.8089	5.10986
A594_1_05782	hypothetical protein	17.5486	23.76	1	6	6	6	282	30.6983	5.42725
A594_1_07336	Glutathione-binding protein GsiB	17.4945	16.9	1	4	4	5	503	55.4243	5.38916
A594_1_04280	Oligopeptide-binding protein AppA	17.4089	15.04	1	5	5	5	512	55.9047	6.12549
A594_1_04912	hypothetical protein	17.4026	50	1	4	4	5	148	15.1038	6.25244
A594_1_04348	Formylaminopyrimidine-binding protein	17.3786	15.96	1	4	4	6	332	35.041	6.39209
A594_1_03410	Inosose dehydratase	17.3391	7.1	1	2	2	4	352	39.0623	5.35107
A594_1_03893	hypothetical protein	17.2747	13.14	1	1	1	4	175	17.2229	4.91943
A594_1_05947	N-((2S)-2-amino-2-carboxyethyl)-L-glutamate dehydrogenase	17.2626	26.05	1	5	5	5	334	36.5922	6.87354
A594_1_03925	Fe/S biogenesis protein NfuA	17.1358	13.46	1	2	2	5	208	22.2652	4.97021
A594_1_03274	Dihydroanticapsin 7-dehydrogenase	17.1358	28.68	1	4	4	5	258	25.7938	8.68994
A594_1_02995	hypothetical protein	17.1042	5.26	1	3	3	5	1007	107.83	5.19873
A594_1_03207	putative transcriptional regulatory protein	17.0263	34.14	1	5	5	5	249	26.9446	5.14795
A594_1_05802	hypothetical protein	17.0263	18.37	1	3	3	4	381	35.8758	5.21143
A594_1_01569	Ferredoxin-2	16.961	34.51	1	3	3	5	113	12.5606	4.37354
A594_1_03025	DNA gyrase subunit A	16.9567	8.34	1	6	6	6	899	98.7975	5.16064
A594_1_01495	Glutamate--cysteine ligase EgtA	16.9502	14.1	1	4	4	4	454	50.1873	5.50342
A594_1_01600	Thioredoxin	16.9158	52.83	1	4	4	5	106	11.4148	5.14795
A594_1_05778	Beta-barrel assembly-enhancing protease	16.8304	16.82	1	6	6	6	446	48.0552	9.08545
A594_1_02850	hypothetical protein	16.8005	20.96	1	6	6	6	415	44.3053	5.08447
A594_1_02893	Iron uptake system component EfeO	16.7954	21.49	1	6	6	6	363	37.9012	5.8208
A594_1_06058	hypothetical protein	16.7625	40	1	3	3	6	95	10.7863	4.85596
A594_1_04557	Protein-methionine-sulfoxide reductase catalytic subunit MsrP	16.7367	11.42	1	3	3	5	324	36.9807	6.40479
A594_1_05046	Alcohol dehydrogenase	16.7127	29.86	1	5	5	5	345	36.4017	6.07471
A594_1_01547	N-acetylcysteine deacetylase	16.7072	14.94	1	4	4	5	395	41.166	5.42725
A594_1_01939	hypothetical protein	16.6715	17.59	1	3	3	5	216	22.0444	8.00146
A594_1_04494	50S ribosomal protein L7/L12	16.6459	23.2	1	2	2	5	125	12.92	4.93213
A594_1_00274	Histidine--tRNA ligase	16.6357	12.08	1	4	4	5	447	48.4448	6.23975
A594_1_02976	Pyruvate dehydrogenase [ubiquinone]	16.6201	12.52	1	5	5	6	575	61.9939	6.39209
A594_1_04968	hypothetical protein	16.5453	40.51	1	5	5	6	158	16.8309	9.86182
A594_1_04120	6-aminohexanoate-cyclic-dimer hydrolase	16.4901	10.4	1	3	3	5	481	51.4724	5.92236
A594_1_04684	DNA-binding protein HU	16.4602	36.08	1	2	2	4	97	9.92727	10.0669
A594_1_05955	Elongation factor P	16.3968	15.96	1	2	2	5	188	20.9705	5.12256
A594_1_00505	Efflux pump periplasmic linker BepF	16.3876	18.39	1	5	5	5	397	42.8431	5.70654
A594_1_03685	putative protein	16.3641	22.48	1	5	5	5	347	37.1975	5.74463
A594_1_01765	Isoleucine--tRNA ligase	16.3443	6.78	1	4	4	5	959	105.892	6.01123
A594_1_03085	Ribose import binding protein RbsB	16.3303	11.84	1	3	3	5	321	33.1111	5.08447
A594_1_04570	S-(hydroxymethyl)glutathione dehydrogenase	16.302	22.22	1	3	3	4	144	15.827	6.94678
A594_1_00220	putative arabinose-binding protein	16.2963	13.03	1	3	3	4	445	48.7562	5.31299
A594_1_04609	Delta-aminolevulinic acid dehydratase	16.2491	19.58	1	5	5	6	332	35.7864	5.2876
A594_1_07439	Flavin-dependent thymidylate synthase	16.0785	22.36	1	5	5	5	313	36.0912	6.20166
A594_1_04133	hypothetical protein	16.0114	19.58	1	5	5	6	337	35.9305	6.53662
A594_1_00545	hypothetical protein	16.0093	37.77	1	4	4	5	188	19.2771	6.94678
A594_1_01576	Proline iminopeptidase	15.9972	22.47	1	4	4	6	316	35.5171	6.93213
A594_1_01723	hypothetical protein	15.9945	8.77	1	2	2	4	308	32.4666	8.89502
A594_1_04365	hypothetical protein	15.9622	16.42	1	4	4	5	341	36.6455	5.31299
A594_1_00293	hypothetical protein	15.8839	5.04	1	2	2	4	794	81.1846	5.22412
A594_1_04261	hypothetical protein	15.8265	25.3	1	4	4	5	253	26.5111	7.06396
A594_1_02051	Malate synthase G	15.7667	7.76	1	5	5	6	722	78.085	6.17627
A594_1_01034	putative enoyl-CoA hydratase echA8	15.7511	25.48	1	5	5	6	259	27.6783	6.80029
A594_1_00563	1-deoxyxylulose-5-phosphate synthase YajO	15.7437	16.72	1	4	4	5	317	34.6891	7.13721
A594_1_07638	FeS cluster assembly protein SufB	15.7093	8.88	1	3	3	5	484	53.871	5.2876
A594_1_06879	hypothetical protein	15.6982	14.87	1	4	4	5	417	45.3523	5.46533
A594_1_03092	hypothetical protein	15.6582	28.66	1	4	4	6	157	18.5221	7.51807
A594_1_04459	Adenylate kinase	15.4229	28.21	1	5	5	5	195	21.4171	5.5415
A594_1_06292	Glutathione-binding protein GsiB	15.4218	10.2	1	4	4	5	539	59.0294	5.17334
A594_1_00254	Putative competence-damage inducible protein	15.4055	19.92	1	3	3	4	256	26.9201	5.68115
A594_1_04781	putative L,D-transpeptidase YcbB	15.3791	5.69	1	2	2	4	562	61.6188	6.59521
A594_1_04472	50S ribosomal protein L29	15.3569	41.18	1	3	3	5	68	7.68818	10.0962
A594_1_03431	Putative NAD(P)H nitroreductase YdjA	15.2753	24.74	1	4	4	5	194	21.1473	6.68311
A594_1_04749	hypothetical protein	15.1944	51.11	1	5	5	6	135	14.7193	5.47803
A594_1_06764	hypothetical protein	15.1682	21.74	1	1	1	3	138	14.5112	6.03662
A594_1_00401	hypothetical protein	15.121	33.64	1	3	3	5	110	11.7901	7.85498
A594_1_05234	Pyrroline-5-carboxylate reductase	15.1032	24.24	1	4	4	4	264	26.895	5.41455
A594_1_07636	FeS cluster assembly protein SufD	15.0657	9.93	1	3	3	5	443	47.3935	6.18896
A594_1_07322	UDP-N-acetylmuramoylalanine--D-glutamate ligase	15.0392	14.62	1	5	5	6	465	48.5032	5.87158
A594_1_01680	Ribonuclease PH	15.0374	23.85	1	4	4	4	239	25.4613	6.3667
A594_1_05812	Alanine--tRNA ligase	15.0345	4.52	1	3	3	4	884	94.8595	5.85889
A594_1_02315	2-dehydro-3-deoxy-L-rhamnonate dehydrogenase (NAD(+))	14.9875	20.66	1	3	3	4	242	25.5292	6.56592
A594_1_05840	UDP-3-O-acylglucosamine N-acyltransferase	14.9843	19.12	1	4	4	5	340	33.9288	6.56592
A594_1_03145	hypothetical protein	14.9033	28.63	1	5	5	5	262	29.2139	6.37939
A594_1_03778	hypothetical protein	14.859	38.55	1	2	2	4	83	9.27746	5.45264
A594_1_04656	Putrescine--pyruvate aminotransferase	14.8525	11.93	1	4	4	5	461	50.5745	6.37939
A594_1_01681	hypothetical protein	14.8212	36.68	1	4	4	5	199	20.989	5.31299
A594_1_00163	Uronate isomerase	14.7859	12.85	1	4	4	5	467	53.2469	6.17627
A594_1_05057	hypothetical protein	14.6288	16.13	1	3	3	5	217	23.6025	7.50342
A594_1_00554	hypothetical protein	14.6233	5.89	1	2	2	5	526	55.7454	5.51611
A594_1_06357	Phospho-2-dehydro-3-deoxyheptonate aldolase	14.5567	11.04	1	4	4	5	462	50.7897	5.88428
A594_1_00500	putative sugar-binding periplasmic protein	14.5462	14.94	1	5	5	5	415	44.9617	5.38916
A594_1_02296	Lysine--tRNA ligase	14.4537	10.34	1	5	5	6	503	56.537	5.85889
A594_1_03441	hypothetical protein	14.4229	12.8	1	3	3	4	336	37.4959	6.06201
A594_1_04351	hypothetical protein	14.4226	16.47	1	4	4	5	346	35.3935	6.25244
A594_1_00004	hypothetical protein	14.4084	19.89	1	2	2	4	186	20.7905	5.56689
A594_1_01977	Ferric uptake regulation protein	14.3739	42.11	1	4	4	5	133	15.7342	6.26514
A594_1_03668	hypothetical protein	14.3706	28.9	1	4	4	5	173	17.8652	8.19189
A594_1_02235	hypothetical protein	14.2593	40.74	1	4	4	5	135	15.3217	5.35107
A594_1_04592	DNA-directed RNA polymerase subunit omega	14.258	40.54	1	4	4	5	148	15.8507	4.06885
A594_1_02316	hypothetical protein	14.1985	13.51	1	2	2	4	333	35.7762	6.15088
A594_1_04502	Pyridoxal 5'-phosphate synthase subunit PdxS	14.1763	23.55	1	4	4	4	310	32.948	5.85889
A594_1_05833	Uridylate kinase	14.1755	18.26	1	3	3	4	241	25.9912	7.09326
A594_1_03234	Cytochrome c2	14.1648	29.46	1	3	3	5	129	13.912	8.76318
A594_1_01882	Pyridoxal 4-dehydrogenase	14.1644	10.03	1	2	2	4	339	36.874	6.32861
A594_1_00422	Aminodeoxyfutalosine deaminase	14.087	17.96	1	3	3	4	323	35.139	6.30322
A594_1_04045	Translation initiation factor IF-2	14.0483	7.77	1	5	5	5	901	96.7746	6.60986
A594_1_00082	Monocarboxylate 2-oxoacid-binding periplasmic protein	13.9441	15.8	1	5	5	5	386	41.7925	8.04541
A594_1_03001	hypothetical protein	13.9017	24.16	1	2	2	3	178	19.0895	7.84033
A594_1_00271	Acetolactate synthase, catabolic	13.8948	5.23	1	2	2	4	555	59.4085	5.61768
A594_1_08006	Protein YobA	13.8839	18.33	1	2	2	4	120	12.1473	6.52197
A594_1_01717	Phosphoribosylaminoimidazole-succinocarboxamide synthase	13.8025	17.65	1	4	4	5	323	36.6338	5.31299
A594_1_07867	10 kDa chaperonin 5	13.7892	32.04	2	1	3	5	103	11.227	5.97314
A594_1_01316	Tryptophan synthase beta chain	13.7597	12.68	1	4	4	4	410	44.5686	6.32861
A594_1_04694	NADH-quinone oxidoreductase chain 3	13.7479	5.7	1	3	3	4	684	73.7165	5.79541
A594_1_01941	Penicillin-binding protein 1A	13.7234	3.96	1	2	2	3	858	91.8783	7.51807
A594_1_03735	LL-diaminopimelate aminotransferase	13.6919	10.05	1	4	4	4	408	43.4826	5.99854
A594_1_05848	Glutamate--tRNA ligase	13.6767	8.53	1	3	3	5	469	51.8861	5.90967
A594_1_02256	hypothetical protein	13.607	38.28	1	3	3	4	128	13.4551	6.52197
A594_1_02147	hypothetical protein	13.595	13.03	1	3	3	4	307	33.3973	6.80029
A594_1_03622	hypothetical protein	13.5611	18.5	1	4	4	5	346	35.1469	9.92041
A594_1_07072	3-oxoadipyl-CoA/3-oxo-5,6-dehydrosuberyl-CoA thiolase	13.5555	10.75	1	3	3	4	400	41.3494	6.93213
A594_1_03473	hypothetical protein	13.517	8.84	1	2	2	4	362	37.8734	4.83057
A594_1_01031	3D-(3,5/4)-trihydroxycyclohexane-1,2-dione hydrolase	13.4022	7.62	1	3	3	4	617	65.2103	6.12549
A594_1_06303	HTH-type transcriptional regulator SgrR	13.3162	11.82	1	4	4	5	533	58.4142	6.17627
A594_1_01989	Nicotinate-nucleotide--dimethylbenzimidazole phosphoribosyltransferase	13.3125	14.53	1	3	3	4	344	35.8053	6.03662
A594_1_07369	hypothetical protein	13.3097	19.18	1	2	2	4	146	15.844	5.09717
A594_1_00156	hypothetical protein	13.2606	11.38	1	4	4	4	413	45.2711	5.87158
A594_1_03515	Heme-binding protein A	13.2448	8.55	1	4	4	4	643	71.1798	5.08447
A594_1_00515	30S ribosomal protein S13	13.2437	8.63	1	1	1	4	139	15.3483	10.6821
A594_1_01864	hypothetical protein	13.1472	18.64	1	3	3	5	177	18.4257	7.25439
A594_1_01257	hypothetical protein	13.0862	26.8	1	3	3	4	153	17.3628	6.93213
A594_1_05292	Bifunctional chorismate mutase/prephenate dehydratase	13.046	19.1	1	4	4	4	288	31.559	6.7124
A594_1_07518	hypothetical protein	12.9674	11.55	1	2	2	4	277	29.3901	6.44287
A594_1_01784	Glutamine--fructose-6-phosphate aminotransferase [isomerizing]	12.9596	17.65	1	3	3	4	340	35.4737	5.93506
A594_1_04465	50S ribosomal protein L6	12.9455	15.25	1	2	2	4	177	19.0823	9.81787
A594_1_04193	hypothetical protein	12.9315	8.76	1	1	1	3	194	20.1138	6.96143
A594_1_02172	Ribonuclease E	12.8895	5.1	1	4	4	4	961	104.881	5.23682
A594_1_00054	General stress protein 18	12.8578	17.37	1	2	2	4	190	19.8194	5.36377
A594_1_03122	hypothetical protein	12.8305	16.13	1	2	2	3	279	27.2715	9.87646
A594_1_01803	AMP nucleosidase	12.785	14.37	1	4	4	4	487	54.3145	6.82959
A594_1_01814	Hydroxyacylglutathione hydrolase	12.7261	10.94	1	2	2	4	256	27.2217	5.46533
A594_1_02676	Penicillin-insensitive murein endopeptidase	12.724	17.13	1	4	4	5	286	30.7739	7.78174
A594_1_05941	Formate dehydrogenase, mitochondrial	12.7158	11.56	1	2	2	3	346	37.4657	6.60986
A594_1_05477	hypothetical protein	12.7022	38.39	1	3	4	4	211	21.5193	6.80029
A594_1_01623	Xanthine phosphoribosyltransferase	12.6826	19.51	1	2	2	3	164	18.6578	6.21436
A594_1_01624	hypothetical protein	12.658	27.06	1	2	2	4	85	8.69765	6.56592
A594_1_01692	DNA polymerase I	12.6364	5.84	1	4	4	4	924	100.826	5.61768
A594_1_02000	L-threonine ammonia-lyase	12.596	21.38	1	5	5	5	318	33.8656	7.28369
A594_1_01874	UTP--glucose-1-phosphate uridylyltransferase	12.5686	23.53	1	4	4	4	289	31.2942	6.04932
A594_1_05882	D-aminopeptidase	12.552	13.51	1	4	4	4	518	55.9653	6.55127
A594_1_04474	30S ribosomal protein S3	12.5392	19.68	1	4	4	5	249	27.7489	10.521
A594_1_06823	Amidophosphoribosyltransferase	12.4888	7.79	1	2	2	4	488	52.7777	6.48096
A594_1_06415	Phosphoribosylformylglycinamidine synthase subunit PurL	12.4701	6.34	1	3	3	3	741	78.2931	4.98291
A594_1_06708	hypothetical protein	12.4692	11.15	1	2	2	3	260	26.6749	5.04639
A594_1_06466	3-oxo-tetronate kinase	12.4009	9.46	1	2	2	3	423	42.7456	6.01123
A594_1_07492	hypothetical protein	12.298	12.39	1	2	2	3	339	36.2554	5.35107
A594_1_05443	hypothetical protein	12.2978	7.85	1	4	4	4	586	63.1542	4.88135
A594_1_01834	Diaminopimelate decarboxylase	12.2373	6.67	1	2	2	3	420	44.6904	5.96045
A594_1_02460	hypothetical protein	12.2345	15.29	1	4	4	4	340	35.0928	5.35107
A594_1_03043	Cystathionine beta-lyase MetC	12.2163	10.15	1	3	3	4	394	42.2235	6.58057
A594_1_01605	1,3-propanediol dehydrogenase	12.1401	18.4	1	4	4	4	375	38.7854	6.66846
A594_1_04423	hypothetical protein	12.1101	26.27	1	3	3	5	118	12.3458	5.47803
A594_1_02514	hypothetical protein	12.0572	21.02	1	3	3	4	157	17.4046	5.59229
A594_1_07240	D-alanine aminotransferase	12.0475	14.89	1	2	2	3	282	30.4321	7.40088
A594_1_01489	Methylmalonyl-CoA carboxyltransferase 12S subunit	12.025	6.17	1	2	2	3	535	57.1874	6.75635
A594_1_05913	Phosphogluconate dehydratase	11.9814	6.3	1	3	3	4	603	63.2865	6.45557
A594_1_03523	hypothetical protein	11.9674	36.04	1	4	4	4	197	21.3008	7.92822
A594_1_04870	Bifunctional protein GlmU	11.9556	10.62	1	3	3	4	452	47.3989	6.29053
A594_1_01630	hypothetical protein	11.9198	5.76	1	3	3	4	798	78.8714	4.67822
A594_1_01892	hypothetical protein	11.8565	12.05	1	2	2	3	249	26.5176	4.98291
A594_1_06672	2-dehydro-3-deoxyphosphooctonate aldolase	11.824	17.5	1	2	2	3	280	29.5194	7.02002
A594_1_02157	Dihydroxy-acid dehydratase	11.7649	7.58	1	4	4	4	620	65.5871	6.20166
A594_1_00321	dTDP-glucose 4,6-dehydratase	11.7121	9.59	1	3	3	4	344	37.8532	6.59521
A594_1_02689	3-isopropylmalate dehydratase small subunit	11.708	16.83	1	3	3	4	202	22.3994	5.13525
A594_1_00383	putative zinc protease	11.6614	11	1	4	4	4	418	45.051	4.83057
A594_1_01377	Minor endoglucanase Y	11.6254	22.19	1	4	4	4	347	37.628	5.51611
A594_1_07590	hypothetical protein	11.6192	8.86	1	2	2	3	440	46.7896	5.10986
A594_1_02870	hypothetical protein	11.6158	37.04	1	3	3	4	108	12.5616	7.41553
A594_1_04452	Acetoacetyl-CoA reductase	11.5538	16.25	1	3	3	3	240	25.2048	7.81104
A594_1_05865	putative 2-dehydro-3-deoxygalactonokinase DgoK1	11.5102	9.6	1	2	2	3	302	31.4694	5.56689
A594_1_02035	2-succinyl-6-hydroxy-2,4-cyclohexadiene-1-carboxylate synthase	11.3585	9.06	1	2	2	3	298	32.6725	6.07471
A594_1_02693	Aspartate-semialdehyde dehydrogenase 2	11.3348	9.94	1	3	3	4	342	37.1434	5.89697
A594_1_04971	FK506-binding protein	11.326	18.64	1	1	1	2	118	12.3413	6.0874
A594_1_07332	hypothetical protein	11.2751	6.77	1	1	1	3	266	28.6701	4.51318
A594_1_01376	hypothetical protein	11.2719	5.94	1	2	2	3	488	52.3077	6.82959
A594_1_00248	Peptidoglycan-associated lipoprotein	11.2567	13.62	1	1	3	4	279	29.4916	5.50342
A594_1_03037	hypothetical protein	11.228	13.88	1	2	2	3	281	28.5454	11.0483
A594_1_05002	hypothetical protein	11.1743	15.06	1	3	3	4	259	28.2715	5.16064
A594_1_04962	hypothetical protein	11.1417	5.13	1	3	3	3	819	89.0583	4.7417
A594_1_00077	NADP/NAD-dependent aldehyde dehydrogenase PuuC	11.1322	8.32	1	3	3	4	481	50.5259	6.31592
A594_1_06360	Ribose-5-phosphate isomerase A	11.0918	18.52	1	3	3	4	243	25.2124	5.37646
A594_1_01727	hypothetical protein	11.088	29.81	1	2	2	3	104	11.4461	6.94678
A594_1_01530	D-alanyl-D-alanine carboxypeptidase DacC	11.0874	11.84	1	3	3	4	380	41.5343	5.79541
A594_1_00083	putative succinyl-CoA:3-ketoacid coenzyme A transferase subunit A	11.0694	19.66	1	4	4	4	234	25.1451	8.36768
A594_1_04618	6,7-dimethyl-8-ribityllumazine synthase 1	11.0519	16.25	1	2	2	3	160	17.2809	6.17627
A594_1_00531	hypothetical protein	11.0417	17.02	1	2	2	4	188	20.6177	7.04932
A594_1_08101	hypothetical protein	11.0231	2.63	1	2	2	3	1142	120.023	4.93213
A594_1_04192	hypothetical protein	11.007	23.2	1	3	3	4	194	20.2427	7.15186
A594_1_04632	NAD/NADP-dependent betaine aldehyde dehydrogenase	10.9936	4.97	1	2	2	3	483	50.7416	6.21436
A594_1_01155	3-phenylpropionate-dihydrodiol/cinnamic acid-dihydrodiol dehydrogenase	10.9364	15.6	1	2	2	2	250	26.1264	8.42627
A594_1_04463	hypothetical protein	10.9262	18.91	1	3	3	4	201	21.5006	10.9751
A594_1_04900	Dihydroanticapsin 7-dehydrogenase	10.8506	14.73	1	3	3	4	258	27.0973	6.354
A594_1_06825	Carbohydrate acetyl esterase/feruloyl esterase	10.8207	15.86	1	4	4	4	391	42.0046	5.74463
A594_1_01715	hypothetical protein	10.7531	22.22	1	2	2	3	135	15.1837	4.77979
A594_1_02538	Fatty acid oxidation complex subunit alpha	10.7461	8.8	1	4	4	4	693	71.985	5.75732
A594_1_02878	Succinate-semialdehyde dehydrogenase [NADP(+)] GabD	10.7041	5.33	1	2	2	4	488	51.3908	5.5542
A594_1_07687	NAD(P)H dehydrogenase (quinone)	10.702	24.62	1	3	3	4	199	20.9346	6.52197
A594_1_00681	hypothetical protein	10.6927	8.04	2	2	2	3	311	33.6626	4.58936
A594_1_07297	2-amino-5-chloromuconic acid deaminase	10.6924	9.45	1	3	3	3	455	47.0778	5.92236
A594_1_01341	Ribose import binding protein RbsB	10.6595	10.58	1	2	2	3	312	33.1629	5.31299
A594_1_07194	Cytochrome c2	10.6463	10.24	1	1	1	3	127	13.1798	8.44092
A594_1_01552	Acetylpolyamine amidohydrolase 2	10.6144	14.2	1	3	3	3	345	37.6678	5.24951
A594_1_02582	hypothetical protein	10.6142	16.03	1	2	2	3	156	16.1699	8.67529
A594_1_07348	hypothetical protein	10.6071	30.13	1	3	3	4	156	16.8448	6.88818
A594_1_02754	Oligo-1,6-glucosidase 1	10.6056	7.51	1	3	3	3	546	61.4885	5.23682
A594_1_02252	hypothetical protein	10.596	16.71	1	3	3	3	353	38.4847	6.45557
A594_1_06924	hypothetical protein	10.5811	7.78	1	2	2	3	501	54.3193	6.3667
A594_1_06327	Putative ring-cleaving dioxygenase MhqO	10.5506	9.35	1	2	2	3	310	33.9235	6.18896
A594_1_03800	Peroxiredoxin	10.5227	16.13	1	3	3	4	217	24.0443	5.64307
A594_1_03900	Aspartate kinase Ask_LysC	10.475	3.94	1	1	1	3	406	43.5638	5.64307
A594_1_04380	Dipeptide-binding protein DppE	10.4649	8.95	1	2	2	3	514	56.9347	5.51611
A594_1_07639	Ferredoxin-6	10.3425	34.26	1	2	2	3	108	12.0138	4.44971
A594_1_03405	Ribonuclease D	10.3252	13.24	1	2	2	3	204	22.5456	5.42725
A594_1_06859	hypothetical protein	10.3215	6.01	1	3	3	4	466	49.8566	5.98584
A594_1_02636	Trans-2,3-dihydro-3-hydroxyanthranilate isomerase	10.3117	10.49	1	2	2	3	305	32.0306	5.38916
A594_1_00327	UDP-glucose 4-epimerase	10.275	17.27	1	3	3	3	330	35.4781	6.34131
A594_1_01189	Formate--tetrahydrofolate ligase	10.265	7.73	1	3	3	4	556	59.1675	7.12256
A594_1_03047	L-fucose mutarotase	10.2447	10.74	1	1	1	2	149	16.4224	5.89697
A594_1_00322	dTDP-4-dehydrorhamnose 3,5-epimerase	10.2197	21.16	1	3	3	3	189	20.5595	6.18896
A594_1_00954	hypothetical protein	10.2175	30.24	1	3	3	3	205	21.1861	8.67529
A594_1_07537	3-oxoacyl-[acyl-carrier-protein] reductase FabG	10.1802	14.67	1	3	3	3	259	26.3216	6.56592
A594_1_04661	Agmatine deiminase	10.1733	12.09	1	3	3	3	339	37.5387	5.2876
A594_1_04389	Inositol-1-monophosphatase ImpA	10.1732	25.68	1	2	2	3	257	27.3819	5.23682
A594_1_04851	hypothetical protein	10.1472	11.28	1	3	3	3	390	40.7685	5.37646
A594_1_06816	hypothetical protein	10.1307	9.19	1	3	3	3	479	50.032	4.81787
A594_1_06738	Translation initiation factor IF-1	10.1062	16.67	1	1	1	3	72	8.30335	9.59814
A594_1_04495	50S ribosomal protein L10	9.9791	26.16	1	3	3	3	172	18.3018	9.86182
A594_1_02349	hypothetical protein	9.95523	13.48	1	1	1	2	178	19.7952	6.41748
A594_1_06352	hypothetical protein	9.92857	14.47	1	3	3	3	304	31.8029	6.27783
A594_1_00886	Nickel-binding periplasmic protein	9.86519	6.51	1	3	3	3	568	61.7581	6.40479
A594_1_04842	6-deoxy-6-sulfo-D-gluconate dehydratase	9.81981	7.24	1	3	3	3	580	63.0274	5.93506
A594_1_05452	hypothetical protein	9.81317	22.03	1	3	3	3	177	19.3417	5.89697
A594_1_05877	hypothetical protein	9.80518	9.86	1	3	3	3	436	46.5571	6.13818
A594_1_02983	Protein-L-isoaspartate O-methyltransferase	9.79414	18.35	1	3	3	3	218	22.7541	5.16064
A594_1_03627	Cold shock protein CspA	9.66922	56.52	1	3	3	4	69	7.58989	8.54346
A594_1_06130	Phosphate-import protein PhnD	9.66135	14.56	1	3	3	3	309	33.9625	8.22119
A594_1_05500	hypothetical protein	9.64805	4.21	1	1	1	2	428	45.6832	4.88135
A594_1_02772	putative protein YcgM	9.57973	15.35	1	2	2	3	228	24.2835	6.34131
A594_1_07144	hypothetical protein	9.52775	8.09	1	2	2	3	272	28.9886	5.69385
A594_1_07956	hypothetical protein	9.50613	6.53	1	1	1	2	337	35.6238	4.76709
A594_1_05543	hypothetical protein	9.49534	16.47	1	2	2	3	170	17.6974	10.6528
A594_1_03909	dTDP-3,4-didehydro-2,6-dideoxy-alpha-D-glucose 3-reductase	9.38081	4.79	1	1	1	3	334	36.562	7.07861
A594_1_05809	Glutamine-dependent NAD(+) synthetase	9.33178	7.43	1	3	3	3	552	60.1308	5.26221
A594_1_05208	Putative aminotransferase/MSMEI_6121	9.31241	7.83	1	2	2	3	434	46.7649	7.43018
A594_1_04519	Carbamoyl-phosphate synthase small chain	9.26976	12.69	1	3	3	3	386	40.9015	5.75732
A594_1_04704	Ribonuclease J	9.25951	8.39	1	3	3	3	560	60.2392	6.01123
A594_1_05037	putative protein	9.24318	7.92	1	3	3	3	530	57.5528	6.80029
A594_1_07188	hypothetical protein	9.10871	20.32	1	3	3	3	187	19.7606	5.99854
A594_1_04682	ATP-dependent Clp protease ATP-binding subunit ClpX	9.03913	2.61	1	1	1	3	421	46.1061	5.8208
A594_1_07107	2-aminoethylphosphonate dioxygenase	9.0375	17.56	1	3	3	3	262	29.5016	5.40186
A594_1_03552	hypothetical protein	9.02098	12.78	1	3	3	3	352	37.9508	7.40088
A594_1_06356	hypothetical protein	9.01239	7.44	1	3	3	3	390	42.5695	6.85889
A594_1_03062	hypothetical protein	8.96972	7.44	4	3	3	3	390	41.0247	4.52588
A594_1_03620	Homoserine dehydrogenase	8.95999	9.53	1	3	3	3	430	45.0289	5.94775
A594_1_01029	5-deoxy-glucuronate isomerase	8.93274	15.07	1	3	3	3	272	30.591	6.1001
A594_1_05866	2-dehydro-3-deoxy-6-phosphogalactonate aldolase	8.92553	24.04	1	3	3	3	208	21.3424	7.98682
A594_1_03898	hypothetical protein	8.91202	4.33	1	1	1	3	393	39.8967	5.50342
A594_1_03322	Cystathionine gamma-synthase	8.89358	7.57	1	2	2	3	383	40.5442	6.46826
A594_1_03857	hypothetical protein	8.86223	17.34	1	2	2	3	173	18.5566	8.14795
A594_1_00587	Orotate phosphoribosyltransferase	8.76445	18.03	1	3	3	3	233	25.7252	6.40479
A594_1_06828	Acyl-CoA dehydrogenase	8.75708	11.87	1	3	3	3	379	41.0774	6.72705
A594_1_06568	hypothetical protein	8.75364	8.27	2	3	3	3	496	51.7547	6.69775
A594_1_03547	Glutathione-binding protein GsiB	8.74483	9.18	1	3	3	3	512	55.5114	6.58057
A594_1_07524	Erythritol/L-threitol-binding protein	8.73576	7.95	1	2	2	3	478	52.214	5.96045
A594_1_02318	L-arabonate dehydratase	8.68091	8.73	1	3	3	3	584	63.3967	6.771
A594_1_04205	Acid phosphatase	8.67222	19.69	1	3	3	3	193	20.9517	6.55127
A594_1_02049	Cold shock protein CspA	8.66313	47.83	1	2	2	3	69	7.63086	8.57275
A594_1_01512	Aspartate aminotransferase	8.64726	13.14	1	2	2	2	388	42.0698	6.56592
A594_1_04475	50S ribosomal protein L22	8.56896	15.08	1	1	1	3	126	14.3418	11.063
A594_1_07474	Nucleoid-associated protein YbaB	8.50526	12.15	1	2	2	3	107	11.4439	5.22412
A594_1_03123	hypothetical protein	8.50056	15.52	1	3	3	3	290	31.9347	5.89697
A594_1_03398	Ribosome hibernation promotion factor	8.48626	23.2	1	3	3	3	194	21.5921	6.65381
A594_1_01788	50S ribosomal protein L19	8.48174	16.54	1	2	2	3	133	15.2752	10.0376
A594_1_01574	Beta-barrel assembly-enhancing protease	8.46836	7.45	1	3	3	3	443	46.0535	6.58057
A594_1_07436	hypothetical protein	8.46696	19.09	1	2	2	3	110	12.0061	5.51611
A594_1_02597	5-aminolevulinate synthase	8.46057	5.17	1	2	2	3	406	43.5573	7.1665
A594_1_04496	50S ribosomal protein L1	8.43119	18.72	1	3	3	3	235	24.462	9.61279
A594_1_05837	1-deoxy-D-xylulose 5-phosphate reductoisomerase	8.42073	9.33	1	3	3	3	386	40.422	5.70654
A594_1_06743	Phosphoglucomutase	8.39566	5.82	1	2	2	3	550	58.2847	6.01123
A594_1_06673	CTP synthase	8.31635	8.12	1	3	3	3	542	59.7657	5.80811
A594_1_01130	Anti-sigma-B factor antagonist	8.28566	21.24	1	2	2	2	113	11.433	5.38916
A594_1_07187	hypothetical protein	8.28016	14.39	1	3	3	3	278	30.3779	8.67529
A594_1_05281	5-oxoprolinase subunit A	8.25116	19.22	1	3	3	3	255	27.1341	6.02393
A594_1_05237	hypothetical protein	8.24453	23.61	1	3	3	3	144	15.6383	8.35303
A594_1_03252	hypothetical protein	8.17131	10.06	1	1	1	2	159	17.6589	6.30322
A594_1_00823	hypothetical protein	8.16088	20.67	1	3	3	3	150	16.0661	4.70361
A594_1_00078	4-formylbenzenesulfonate dehydrogenase TsaC1/TsaC2	8.15492	15.2	1	2	2	2	250	26.0995	6.354
A594_1_00528	hypothetical protein	8.15162	9.32	1	1	1	2	161	16.9941	6.30322
A594_1_04893	Cytoplasmic trehalase	8.10491	3.42	1	1	1	2	556	61.4371	5.47803
A594_1_01947	Molybdenum cofactor biosynthesis protein B	8.08624	15.25	1	2	2	3	177	19.345	5.96045
A594_1_05851	Myo-inositol 2-dehydrogenase	8.07351	9.07	1	2	2	3	375	40.3055	5.85889
A594_1_00126	4-hydroxy-tetrahydrodipicolinate synthase	8.04901	9.57	1	2	2	3	303	32.733	5.59229
A594_1_02544	Glutathione S-transferase	8.0423	7.41	1	1	1	2	216	23.1179	6.91748
A594_1_01775	Outer membrane protein	8.03706	8.36	1	1	2	3	335	36.0771	5.21143
A594_1_07550	hypothetical protein	8.02933	4.38	1	1	1	3	365	39.2588	5.71924
A594_1_03240	Protein RocB	8.00252	2.61	1	1	1	2	536	55.8332	5.24951
A594_1_07248	putative dipeptidase PepE	7.95308	10.66	1	3	3	3	366	38.8059	5.85889
A594_1_06361	Glutarate-semialdehyde dehydrogenase	7.92934	7.24	1	3	3	3	497	53.0831	5.51611
A594_1_03787	Aerobic cobaltochelatase subunit CobS	7.90892	8.59	1	3	3	3	326	36.2474	5.97314
A594_1_02273	2-haloacrylate reductase	7.88924	9.91	1	2	2	3	333	34.5353	6.25244
A594_1_00863	hypothetical protein	7.88654	14.39	1	3	3	3	278	30.413	5.14795
A594_1_06432	hypothetical protein	7.86633	17.54	1	3	3	3	228	24.5904	8.19189
A594_1_06068	3',5'-cyclic adenosine monophosphate phosphodiesterase CpdA	7.86015	12.78	1	2	2	2	313	33.0067	5.98584
A594_1_07173	Glutathione-binding protein GsiB	7.78875	3.73	1	2	2	3	510	55.1513	6.16357
A594_1_04830	P-loop guanosine triphosphatase YjiA	7.77815	14.33	1	3	3	3	342	36.5579	4.89404
A594_1_06445	RNA polymerase-binding transcription factor DksA	7.76495	14.39	1	2	2	2	139	16.1741	5.09717
A594_1_01958	hypothetical protein	7.72854	32.65	1	2	2	2	98	10.6727	6.55127
A594_1_04301	Protein DipZ	7.69023	2.8	1	1	1	2	572	60.5849	6.53662
A594_1_06162	D-glucosaminate-6-phosphate ammonia lyase	7.67569	8.19	1	2	2	2	403	42.2763	6.55127
A594_1_03725	hypothetical protein	7.66815	5.11	1	1	1	2	313	33.8514	5.41455
A594_1_05474	hypothetical protein	7.6634	24.22	1	2	2	2	128	13.2869	8.51416
A594_1_01845	Homospermidine synthase	7.65263	10.64	1	3	3	3	470	51.0712	6.15088
A594_1_00448	hypothetical protein	7.64752	8.16	1	3	3	3	564	56.9502	5.56689
A594_1_04585	hypothetical protein	7.63982	3.91	1	2	2	2	665	72.1566	5.46533
A594_1_04102	hypothetical protein	7.63921	4.13	1	2	2	3	605	68.4322	6.59521
A594_1_00517	hypothetical protein	7.58848	17.16	1	2	2	3	134	14.5743	5.52881
A594_1_05250	hypothetical protein	7.57321	11.57	1	2	2	3	242	24.9483	9.979
A594_1_04654	hypothetical protein	7.56858	5.26	1	1	1	2	285	31.5106	4.81787
A594_1_01068	hypothetical protein	7.56628	14.39	1	1	1	2	132	13.6056	4.99561
A594_1_02990	hypothetical protein	7.47823	5.9	1	1	1	2	271	29.1807	5.08447
A594_1_00229	hypothetical protein	7.47378	3.66	1	1	1	2	437	45.8794	6.75635
A594_1_06438	(R)-citramalate synthase	7.45772	2.82	1	1	1	2	531	57.3093	5.97314
A594_1_05732	hypothetical protein	7.44449	9.09	1	1	1	2	165	17.0578	4.79248
A594_1_01509	Solute-binding protein	7.39982	16.15	1	3	3	3	322	35.4522	6.06201
A594_1_06385	Isochorismatase family protein YecD	7.32723	18.95	1	2	2	2	190	20.1796	6.32861
A594_1_00332	hypothetical protein	7.27915	13.99	1	2	2	2	243	26.5594	6.22705
A594_1_00395	GTP-binding protein TypA/BipA	7.26437	5.45	1	2	2	2	606	66.7249	5.49072
A594_1_02909	hypothetical protein	7.26123	7.72	1	2	2	2	337	36.0806	5.30029
A594_1_02704	hypothetical protein	7.24544	29.5	1	2	2	2	139	13.6201	8.646
A594_1_07945	Glutathione synthetase	7.1663	8.18	1	2	2	2	318	35.5365	5.96045
A594_1_04385	hypothetical protein	7.16558	5.91	1	2	2	2	508	53.8426	7.07861
A594_1_02094	Acetyl-coenzyme A carboxylase carboxyl transferase subunit alpha	7.16327	4.1	1	1	1	2	317	34.1871	6.45557
A594_1_02809	Methylthioribose-1-phosphate isomerase	7.16213	7.67	1	3	3	3	365	39.4952	6.40479
A594_1_04238	hypothetical protein	7.11539	10.9	1	2	2	3	156	17.5809	4.04346
A594_1_04622	Outer membrane protein assembly factor BamE	7.07765	18.08	1	2	2	2	177	18.9357	8.17725
A594_1_00283	Outer membrane protein A	7.07102	15.27	1	1	1	2	131	13.4182	7.44482
A594_1_01743	hypothetical protein	7.04263	29.29	1	2	2	2	99	10.7744	7.41553
A594_1_05788	Adaptive-response sensory-kinase SasA	7.02553	4.21	1	3	3	3	831	88.3978	5.78271
A594_1_05763	3-phosphoshikimate 1-carboxyvinyltransferase	7.01043	6.21	1	2	2	3	419	43.5576	5.47803
A594_1_04030	Purine nucleoside phosphoramidase	6.98197	21.14	1	2	2	2	123	13.3329	6.88818
A594_1_06416	putative protein RP812	6.92768	41.03	1	2	2	2	78	8.46418	6.12549
A594_1_01233	RNA pyrophosphohydrolase	6.90711	19.5	1	2	2	2	159	18.3143	5.19873
A594_1_00795	hypothetical protein	6.90595	8.67	1	2	2	2	346	37.2629	5.21143
A594_1_01517	hypothetical protein	6.90409	3.92	1	1	1	2	357	37.4669	6.40479
A594_1_05827	hypothetical protein	6.8705	21.24	1	2	2	2	113	12.1963	6.53662
A594_1_02581	Pyridoxine/pyridoxamine 5'-phosphate oxidase	6.86561	14.22	1	2	2	2	225	25.1096	6.41748
A594_1_04324	hypothetical protein	6.86115	7.69	1	2	2	2	403	42.7797	5.51611
A594_1_02948	hypothetical protein	6.83359	14.62	1	1	2	2	212	22.7881	5.24951
A594_1_00574	hypothetical protein	6.82864	15.63	1	2	2	3	128	13.291	8.55811
A594_1_00044	2-keto-3-deoxy-L-fuconate dehydrogenase	6.82701	5.26	1	1	1	2	247	25.4289	6.66846
A594_1_00971	FMN-dependent NADH-azoreductase	6.79431	14.29	1	2	2	2	210	23.3641	5.65576
A594_1_03714	hypothetical protein	6.79241	20	1	2	2	2	170	17.573	5.50342
A594_1_04490	hypothetical protein	6.79004	22.95	1	2	2	2	122	12.6115	9.62744
A594_1_04466	30S ribosomal protein S8	6.79	18.18	1	2	2	2	132	14.3418	9.979
A594_1_04756	hypothetical protein	6.75874	9.4	1	1	1	2	149	16.8317	5.89697
A594_1_07637	putative ATP-dependent transporter SufC	6.73119	11.65	1	2	2	2	249	26.9042	6.03662
A594_1_00368	hypothetical protein	6.72782	21.88	1	1	1	2	64	6.66125	5.78271
A594_1_08102	hypothetical protein	6.70686	5.25	1	2	2	2	724	78.8565	5.22412
A594_1_02398	hypothetical protein	6.69205	12.9	1	1	1	2	124	13.5008	4.70361
A594_1_03885	hypothetical protein	6.67736	23.74	1	2	2	2	198	21.1329	5.97314
A594_1_03694	Glucose-6-phosphate 1-dehydrogenase	6.66328	5.3	1	2	3	3	509	55.7435	5.42725
A594_1_01757	hypothetical protein	6.65455	12.9	1	2	2	2	186	19.2903	8.646
A594_1_00560	Glutathione-binding protein GsiB	6.64378	6.3	1	2	2	2	508	54.547	5.32568
A594_1_04832	Corrinoid adenosyltransferase	6.64072	6.73	1	1	1	2	208	23.2361	6.81494
A594_1_03480	hypothetical protein	6.63359	16.76	1	2	2	2	185	20.4367	8.57275
A594_1_01578	Transcriptional regulatory protein BaeR	6.56917	14.22	1	2	2	2	232	26.2047	5.93506
A594_1_05016	hypothetical protein	6.53811	10.33	1	2	2	2	271	29.4722	6.37939
A594_1_06472	hypothetical protein	6.53119	12.15	1	1	1	2	181	19.71	5.22412
A594_1_02731	Aminomethyltransferase	6.48293	9.14	1	2	2	2	372	39.2054	5.84619
A594_1_00442	Propionyl-CoA carboxylase beta chain	6.47596	7.25	1	2	2	2	510	55.3483	6.06201
A594_1_07457	hypothetical protein	6.46757	14.74	1	1	1	2	156	15.7203	6.29053
A594_1_01214	Glucose 1-dehydrogenase 1	6.42879	18.7	1	2	2	2	262	26.8149	7.34229
A594_1_07247	Isoaspartyl peptidase	6.42693	8.75	1	2	2	2	320	33.3455	6.0874
A594_1_00629	hypothetical protein	6.42389	6.31	1	2	2	2	428	46.6568	6.34131
A594_1_04587	L-threo-3-hydroxyaspartate ammonia-lyase	6.41942	4.94	1	1	1	2	324	33.7098	7.09326
A594_1_04481	30S ribosomal protein S10	6.41226	13.73	1	1	1	2	102	11.6483	9.77393
A594_1_00514	30S ribosomal protein S11	6.40588	11.19	1	1	1	2	134	14.3106	11.7222
A594_1_01168	Bifunctional purine biosynthesis protein PurH	6.39981	5.69	1	1	1	2	527	54.6775	6.41748
A594_1_06812	30S ribosomal protein S6	6.39896	9.87	1	1	1	2	152	16.9624	6.25244
A594_1_05345	Oligopeptide-binding protein AppA	6.32475	4.36	1	2	2	2	550	58.9556	6.17627
A594_1_03459	Cytochrome c-type biogenesis protein CcmE	6.31082	16.77	1	2	2	2	161	16.9439	7.59131
A594_1_01481	Acetyl-/propionyl-coenzyme A carboxylase alpha chain	6.30572	4.27	1	2	2	2	655	68.8408	5.78271
A594_1_01769	hypothetical protein	6.30157	13.11	2	2	2	2	206	21.8882	6.02393
A594_1_01072	NAD-dependent glycerol dehydrogenase	6.29081	10.66	1	2	2	2	244	25.395	5.43994
A594_1_04852	2,3-dehydroadipyl-CoA hydratase	6.25317	6.32	1	2	2	3	253	26.5832	5.36377
A594_1_04498	Transcription termination/antitermination protein NusG	6.24721	19.21	1	2	2	2	177	20.2165	5.97314
A594_1_04464	50S ribosomal protein L18	6.24663	19.01	1	2	2	2	121	13.2773	10.3892
A594_1_01311	Exodeoxyribonuclease 7 small subunit	6.23898	28.92	1	2	2	2	83	8.94854	4.84326
A594_1_04518	putative protein YqeY	6.2331	20.53	1	2	2	2	151	16.8257	8.33838
A594_1_06865	Formylaminopyrimidine-binding protein	6.21803	8.99	1	2	2	2	345	36.9999	5.19873
A594_1_00679	hypothetical protein	6.20094	19.66	1	2	2	2	117	12.7294	8.20654
A594_1_06359	Glutathione amide reductase	6.17223	6.3	1	2	2	2	460	48.6749	6.48096
A594_1_07510	hypothetical protein	6.16361	7.5	1	1	1	2	160	16.4575	9.42236
A594_1_07112	2-aminoethylphosphonate--pyruvate transaminase	6.14563	7.88	1	2	2	2	368	39.769	6.81494
A594_1_06600	hypothetical protein	6.1409	8.81	1	1	1	2	159	17.1615	8.00146
A594_1_04617	Riboflavin biosynthesis protein RibBA	6.13221	6.78	1	2	2	2	354	38.5119	5.59229
A594_1_07549	Putative hydroxypyruvate reductase	6.10686	8.21	1	2	2	2	414	42.6663	5.16064
A594_1_06757	UDP-N-acetylglucosamine 1-carboxyvinyltransferase	6.09585	5.62	1	2	2	2	427	44.9046	6.55127
A594_1_00056	Methionine aminotransferase	6.06838	7.16	1	2	2	2	405	43.4832	6.20166
A594_1_05570	hypothetical protein	6.02075	17.19	1	2	2	2	128	13.8512	7.97217
A594_1_00298	Regulator of ribonuclease activity A	6.01214	5.24	1	1	1	2	229	23.3543	5.2876
A594_1_03147	hypothetical protein	5.9679	12.8	1	2	2	2	211	22.7599	6.93213
A594_1_05928	L-idonate 5-dehydrogenase (NAD(P)(+))	5.94273	8.41	1	2	2	2	345	36.992	6.93213
A594_1_07692	hypothetical protein	5.93279	8.53	1	2	2	2	258	26.7509	6.23975
A594_1_02168	Adenine deaminase	5.9248	4.32	1	2	2	2	602	64.0088	5.89697
A594_1_07427	Acetolactate synthase isozyme 3 large subunit	5.90882	4.75	1	2	2	2	590	63.9397	6.22705
A594_1_01084	N-carbamoyl-L-amino acid hydrolase	5.86568	5.74	1	2	2	2	418	44.3787	5.14795
A594_1_07124	Type 3 secretion system secretin	5.85622	14.23	1	2	2	2	239	25.5307	9.59814
A594_1_04838	2-ketogluconate reductase	5.83993	10.61	1	2	2	2	311	33.0736	6.80029
A594_1_03262	hypothetical protein	5.80801	13.73	1	2	2	2	204	21.956	4.77979
A594_1_04021	ATP-dependent protease ATPase subunit HslU	5.80696	4.57	1	2	2	2	438	48.7417	5.64307
A594_1_01075	NAD/NADP-dependent betaine aldehyde dehydrogenase	5.78889	2.89	1	2	2	2	797	85.4441	6.50732
A594_1_04024	Histidine biosynthesis bifunctional protein HisB	5.77067	10.1	1	2	2	2	208	22.8415	6.21436
A594_1_01868	50S ribosomal protein L20	5.73729	9.09	1	1	1	2	121	13.8736	10.8726
A594_1_00611	L-arabinose 1-dehydrogenase (NAD(P)(+))	5.72439	3.87	1	1	1	2	310	33.7235	6.01123
A594_1_03841	hypothetical protein	5.66343	5.96	1	2	2	2	520	55.7906	5.38916
A594_1_02111	5-keto-4-deoxy-D-glucarate aldolase	5.66261	8.27	1	1	1	1	254	27.0841	5.49072
A594_1_03315	Pyridoxal 4-dehydrogenase	5.65399	6.48	1	2	2	2	355	38.2426	5.96045
A594_1_00059	hypothetical protein	5.61475	4.81	1	2	2	2	665	71.618	5.13525
A594_1_00790	hypothetical protein	5.6069	4.08	1	2	2	2	638	71.3308	5.43994
A594_1_04675	Aspartate aminotransferase	5.59949	8.51	1	2	2	2	388	41.4413	6.44287
A594_1_06694	putative lipoprotein YiaD	5.59735	9.91	1	1	1	1	212	21.577	8.48486
A594_1_01143	hypothetical protein	5.57882	22.58	1	2	2	2	124	13.5329	7.43018
A594_1_03457	Thiol:disulfide interchange protein DsbE	5.56953	18.54	1	2	2	2	178	19.1574	7.29834
A594_1_04398	hypothetical protein	5.56175	13.3	1	2	2	2	233	26.6211	6.15088
A594_1_07538	Macrocin O-methyltransferase	5.54116	11.98	1	2	2	2	242	26.3575	6.55127
A594_1_04497	50S ribosomal protein L11	5.50295	14.69	1	1	1	2	143	15.162	9.84717
A594_1_06766	Pseudouridine-5'-phosphate glycosidase	5.47983	7.57	1	2	2	2	304	30.9756	5.49072
A594_1_07625	hypothetical protein	5.47494	11.83	1	2	2	2	169	17.6973	5.21143
A594_1_04094	hypothetical protein	5.45422	13.56	1	2	2	2	354	37.2671	6.88818
A594_1_05567	hypothetical protein	5.45014	5.17	2	2	2	2	542	59.4521	5.56689
A594_1_04004	Transcription termination factor Rho	5.42663	8.85	1	2	2	2	418	46.8443	5.60498
A594_1_02317	Sulfoquinovose 1-dehydrogenase	5.40449	10.85	1	2	2	2	258	28.3243	6.63916
A594_1_05766	Argininosuccinate lyase	5.39204	7.81	1	2	2	2	474	51.2254	6.26514
A594_1_03254	hypothetical protein	5.35242	8.2	1	2	2	2	500	51.9647	5.2876
A594_1_03214	hypothetical protein	5.34969	4.66	1	1	1	1	386	39.4104	7.1665
A594_1_03828	Bifunctional protein HldE	5.33112	4.87	1	2	2	2	493	51.7921	5.56689
A594_1_06709	Carbon monoxide dehydrogenase small chain	5.33066	22.09	1	2	2	2	163	17.4176	6.39209
A594_1_06546	hypothetical protein	5.32489	1.47	1	1	1	2	746	78.1031	6.15088
A594_1_04975	D-alanine aminotransferase	5.30208	9.15	1	2	2	2	284	31.3415	9.48096
A594_1_05842	Acyl-[acyl-carrier-protein]--UDP-N-acetylglucosamine O-acyltransferase	5.29312	4.83	1	1	1	2	269	28.7239	7.6499
A594_1_04471	30S ribosomal protein S17	5.27314	20.43	1	2	2	2	93	10.2706	9.92041
A594_1_04059	Transcriptional regulatory protein ros	5.25394	18.38	1	2	2	2	136	15.0368	9.23193
A594_1_03417	hypothetical protein	5.25193	4.38	1	1	1	1	388	42.1414	6.45557
A594_1_07319	UDP-N-acetylmuramoyl-L-alanyl-D-glutamate--2,6-diaminopimelate ligase	5.2238	5.18	1	2	2	2	483	50.1783	6.81494
A594_1_07364	hypothetical protein	5.21896	2.95	1	2	2	2	813	87.7965	4.91943
A594_1_02746	3-isopropylmalate dehydratase large subunit 1	5.18112	6.2	1	2	2	2	468	49.9662	6.06201
A594_1_03065	3-mercaptopyruvate sulfurtransferase	5.17888	12.24	1	2	2	2	286	29.9541	5.33838
A594_1_06335	D-hydantoinase/dihydropyrimidinase	5.17849	5.54	1	2	2	2	487	53.0728	6.34131
A594_1_03221	Phosphoglucosamine mutase	5.16512	6.86	1	2	2	2	452	47.7768	6.22705
A594_1_08121	hypothetical protein	5.16163	8.31	1	2	2	2	421	45.3213	6.354
A594_1_03258	1,3-propanediol dehydrogenase	5.15226	6.23	1	2	2	2	385	40.907	6.53662
A594_1_07291	Putative aliphatic sulfonates-binding protein	5.13392	7.62	1	2	2	2	315	33.0417	5.79541
A594_1_07988	DNA ligase	5.08979	2.52	1	2	2	2	714	77.8612	5.5415
A594_1_07186	hypothetical protein	5.08464	6.08	1	1	1	2	181	19.4681	7.85498
A594_1_01149	Histidinol dehydrogenase	5.08363	4.31	1	1	1	1	441	46.009	5.97314
A594_1_04137	Glycerophosphodiester phosphodiesterase, cytoplasmic	4.991	6.17	1	1	1	2	243	26.2408	5.52881
A594_1_03640	30S ribosomal protein S9	4.95945	16.46	1	2	2	2	158	17.3462	10.3013
A594_1_02705	Isoquinoline 1-oxidoreductase subunit alpha	4.95566	24	2	2	2	2	150	15.6016	4.90674
A594_1_08089	hypothetical protein	4.95534	7.72	1	2	2	2	285	31.1861	5.37646
A594_1_03427	Chaperone protein ClpB	4.90167	3.34	2	2	2	2	869	95.4962	5.63037
A594_1_01671	Phosphate-specific transport system accessory protein PhoU	4.8936	8.23	1	2	2	2	243	27.0941	5.19873
A594_1_01870	Acetylornithine/succinyldiaminopimelate aminotransferase	4.88896	6.06	1	2	2	2	396	42.4579	6.30322
A594_1_00094	Xylulose kinase	4.87842	4.12	1	2	2	2	486	50.7941	6.16357
A594_1_03026	Phosphopantetheine adenylyltransferase	4.87502	12.79	1	2	2	2	172	18.887	9.0708
A594_1_05178	sn-glycerol-3-phosphate-binding periplasmic protein UgpB	4.86773	5.46	1	2	2	2	421	45.073	5.50342
A594_1_05429	Fructosamine deglycase FrlB	4.84375	7.42	1	2	2	2	337	36.5341	5.92236
A594_1_07599	Aldo-keto reductase IolS	4.83022	7.9	1	2	2	2	329	35.1823	7.07861
A594_1_07663	Arginase	4.82442	8.23	1	2	2	2	328	35.0631	5.24951
A594_1_02892	Deferrochelatase/peroxidase EfeB	4.79292	2.77	1	1	1	2	433	46.1858	5.40186
A594_1_04469	50S ribosomal protein L24	4.77562	31.43	1	2	2	2	105	11.2802	10.3159
A594_1_04627	3-oxoacyl-[acyl-carrier-protein] synthase 3	4.77341	6.46	1	2	2	2	325	34.3008	5.66846
A594_1_01215	2-succinyl-6-hydroxy-2,4-cyclohexadiene-1-carboxylate synthase	4.74265	7.8	1	1	2	2	295	31.588	5.99854
A594_1_05355	Sulfoacetaldehyde dehydrogenase	4.73728	2.4	1	1	1	2	458	49.6537	6.1001
A594_1_04022	ATP-dependent protease subunit HslV	4.73049	13.74	1	2	2	2	182	19.3429	6.91748
A594_1_06015	Translation initiation factor IF-3	4.72901	12.96	1	2	2	2	162	18.6369	9.12939
A594_1_02564	hypothetical protein	4.71817	19.42	1	2	2	2	139	15.7708	6.52197
A594_1_07012	Glycine--tRNA ligase alpha subunit	4.71523	8.19	1	2	2	2	293	33.3857	5.38916
A594_1_02984	Sulfurtransferase	4.70032	22.43	1	1	2	2	107	11.8729	5.05908
A594_1_07016	hypothetical protein	4.68919	3.78	1	1	1	2	238	24.802	4.98291
A594_1_03241	hypothetical protein	4.67406	13.25	1	1	1	2	83	9.39964	5.10986
A594_1_01716	hypothetical protein	4.63162	3.11	1	1	1	1	675	70.8025	5.13525
A594_1_06948	50S ribosomal protein L21	4.62632	10.58	1	1	1	2	104	11.3203	10.3306
A594_1_05839	Outer membrane protein assembly factor BamA	4.56677	3.23	1	2	2	2	774	85.8002	4.98291
A594_1_08110	hypothetical protein	4.54682	0.8	1	1	1	2	877	94.4275	5.51611
A594_1_03342	Peptide methionine sulfoxide reductase MsrA	4.524	10.84	1	2	2	2	203	22.4073	5.46533
A594_1_06836	Phenylacetate-coenzyme A ligase	4.50713	6.86	1	2	2	2	408	43.6186	5.60498
A594_1_01881	2-dehydro-3-deoxygluconokinase	4.49221	2.6	1	1	1	2	308	32.3014	6.44287
A594_1_01583	PTS system mannose-specific EIIAB component	4.47867	9.22	1	1	1	2	141	15.0149	6.31592
A594_1_03807	4-diphosphocytidyl-2-C-methyl-D-erythritol kinase	4.45855	3.51	1	1	1	2	285	28.6963	6.58057
A594_1_04232	Delta(1)-pyrroline-2-carboxylate reductase	4.45198	7.62	1	2	2	2	315	33.2815	5.69385
A594_1_04448	hypothetical protein	4.42171	13.55	1	1	1	1	214	23.5858	5.30029
A594_1_01251	putative 3-hydroxybutyryl-CoA dehydrogenase	4.41941	6.9	1	2	2	2	290	31.8606	6.16357
A594_1_02378	hypothetical protein	4.38964	15.22	1	1	1	1	138	14.5149	7.43018
A594_1_04872	hypothetical protein	4.38433	2.87	1	1	2	2	557	61.5264	5.57959
A594_1_03152	hypothetical protein	4.3815	6.12	1	2	2	2	343	37.6444	6.40479
A594_1_00610	hypothetical protein	4.37295	27.16	1	1	1	1	81	8.64208	4.65283
A594_1_01165	Ribulose-phosphate 3-epimerase	4.34993	6.33	1	1	1	1	221	23.1842	6.03662
A594_1_06453	tRNA-modifying protein YgfZ	4.34747	6.14	1	1	1	1	293	31.0934	6.07471
A594_1_07801	Periplasmic alpha-galactoside-binding protein	4.31401	3.36	1	2	2	2	654	73.3678	5.2749
A594_1_03351	Purine nucleoside phosphorylase	4.27515	6.67	1	1	1	1	270	28.3519	6.7417
A594_1_04077	Adenine deaminase	4.26367	3.17	1	1	1	1	568	60.2181	6.20166
A594_1_04213	5-methyltetrahydropteroyltriglutamate--homocysteine methyltransferase	4.25528	4.1	1	1	1	1	366	40.9285	5.75732
A594_1_04455	Alcohol dehydrogenase	4.24102	5.62	1	1	1	1	338	35.5576	7.34229
A594_1_01256	hypothetical protein	4.23389	25.76	1	1	1	1	66	7.07463	4.94482
A594_1_01222	hypothetical protein	4.21916	9.24	1	2	2	2	184	20.2996	5.42725
A594_1_04562	N-acetylmuramic acid 6-phosphate etherase	4.18207	6.44	1	1	1	1	295	30.0077	6.25244
A594_1_06564	hypothetical protein	4.17343	15.45	1	1	1	1	110	11.6308	4.61475
A594_1_06827	Carnitinyl-CoA dehydratase	4.13712	4.51	1	1	1	1	355	38.0263	5.33838
A594_1_00010	Oxygen-dependent coproporphyrinogen-III oxidase	4.12095	5.96	1	1	1	1	285	31.8526	6.01123
A594_1_01487	Enoyl-CoA-hydratase	4.11606	6.98	1	1	1	1	258	26.957	5.97314
A594_1_07325	UDP-N-acetylmuramate--L-alanine ligase	4.10744	2.72	1	1	1	1	478	50.9493	6.53662
A594_1_00292	Porphobilinogen deaminase	4.07695	5.41	1	1	1	1	314	33.0557	7.51807
A594_1_01086	hypothetical protein	4.026	6.23	1	1	1	1	305	34.8333	6.04932
A594_1_03301	hypothetical protein	4.01734	8.93	1	1	1	1	168	18.1557	5.13525
A594_1_01051	DNA gyrase subunit B	4.00114	2.2	1	1	1	1	819	90.1702	5.75732
A594_1_00144	3-oxoacyl-[acyl-carrier-protein] reductase FabG	3.97876	8.95	1	1	1	1	257	26.0267	7.38623
A594_1_04972	Fructose-1,6-bisphosphatase/inositol-1-monophosphatase	3.94475	5.88	1	1	1	1	272	29.2213	5.37646
A594_1_00865	putative oxidoreductase	3.94198	6.64	1	1	1	1	256	26.6576	5.19873
A594_1_02811	hypothetical protein	3.92511	9.38	1	1	1	1	128	13.8382	5.08447
A594_1_02741	hypothetical protein	3.91519	5.12	1	1	1	1	332	34.2071	5.40186
A594_1_04974	RNA-binding protein Hfq	3.90944	16.25	1	1	1	1	80	9.19691	9.24658
A594_1_04468	50S ribosomal protein L5	3.89071	8.38	1	1	1	1	179	20.1079	9.64209
A594_1_04568	Inositol 2-dehydrogenase/D-chiro-inositol 3-dehydrogenase	3.88426	4.7	1	1	1	1	362	39.756	5.8208
A594_1_02872	Outer membrane protein assembly factor BamB	3.86215	4.55	1	1	1	1	440	45.4685	5.60498
A594_1_01286	hypothetical protein	3.86169	4.74	1	1	1	1	274	31.1044	5.16064
A594_1_02167	ATP synthase epsilon chain	3.86078	9.86	1	1	1	1	142	15.0728	5.021
A594_1_03693	6-phosphogluconate dehydrogenase, NAD(+)-dependent, decarboxylating	3.83738	5.5	1	1	1	1	327	34.6426	5.84619
A594_1_02913	putative tautomerase	3.76322	19.23	1	1	1	1	78	8.36648	5.0083
A594_1_04467	30S ribosomal protein S14	3.75931	12.87	1	1	1	1	101	11.7074	11.561
A594_1_02786	hypothetical protein	3.72814	4.25	1	1	1	1	400	43.7797	5.5542
A594_1_02545	hypothetical protein	3.72753	17.24	1	1	1	1	116	12.4592	5.70654
A594_1_06069	Plastocyanin	3.70056	27.43	1	1	1	1	113	12.0682	7.44482
A594_1_03292	hypothetical protein	3.69528	4.78	1	1	1	1	418	43.9994	4.80518
A594_1_03090	D-xylulose reductase	3.68368	10.2	1	1	1	1	343	36.0789	5.89697
A594_1_01225	Gamma-glutamyl phosphate reductase	3.67196	2.81	1	1	1	1	427	44.7893	5.74463
A594_1_03812	hypothetical protein	3.64843	21.1	1	1	1	1	109	11.754	9.43701
A594_1_04616	Riboflavin synthase	3.6256	4.9	1	1	1	1	204	21.9002	5.2876
A594_1_00400	Alkyl hydroperoxide reductase AhpD	3.62372	10.73	1	1	1	1	177	18.5665	6.91748
A594_1_04445	Bacterioferritin	3.61713	8.86	1	1	1	1	158	18.2294	5.03369
A594_1_07105	Alkanal monooxygenase alpha chain	3.59705	5.23	1	1	1	1	344	37.6814	6.02393
A594_1_01540	hypothetical protein	3.5959	15.38	1	1	1	1	117	12.3293	5.96045
A594_1_06772	5'-methylthioadenosine/S-adenosylhomocysteine nucleosidase	3.59074	10.63	1	1	1	1	254	26.9481	5.36377
A594_1_02512	hypothetical protein	3.58551	5.36	1	1	1	1	280	29.0625	5.73193
A594_1_01312	Folylpolyglutamate synthase	3.5815	4.15	1	1	1	1	434	45.9933	6.03662
A594_1_00977	hypothetical protein	3.55695	3.84	1	1	1	1	391	43.2382	4.99561
A594_1_07666	Thiamine-phosphate synthase	3.55155	12.32	1	1	1	1	138	14.0391	4.7417
A594_1_00535	Glutamyl-tRNA(Gln) amidotransferase subunit C	3.52997	13.68	1	1	1	1	95	10.2092	4.75439
A594_1_04555	Thioredoxin reductase	3.50054	4.13	1	1	1	1	339	36.1833	5.89697
A594_1_06181	hypothetical protein	3.49577	11.33	1	1	1	1	150	16.5171	4.77979
A594_1_00171	D-xylose dehydrogenase	3.48251	3.92	1	1	1	1	383	43.1988	7.34229
A594_1_03042	Phosphoribosyl-AMP cyclohydrolase	3.48081	9.09	1	1	1	1	132	14.8244	6.37939
A594_1_01824	Esterase EstB	3.47983	3.56	1	1	1	1	393	41.0922	5.57959
A594_1_05704	hypothetical protein	3.47402	9.33	1	1	1	1	193	21.3916	4.39893
A594_1_03004	hypothetical protein	3.46808	4.9	1	1	1	1	245	27.801	6.39209
A594_1_07649	Putative peroxiredoxin bcp	3.43599	9.09	1	1	1	1	154	16.6085	7.13721
A594_1_03764	2-ketogluconate reductase	3.43215	4.14	1	1	1	1	314	33.3505	7.04932
A594_1_04674	Nitrogen regulatory protein P-II	3.42198	11.61	1	1	1	1	112	12.3387	6.58057
A594_1_01032	Inosose dehydratase	3.42155	5.03	1	1	1	1	298	32.6386	6.01123
A594_1_06648	Non-heme chloroperoxidase	3.41148	5.76	1	1	1	1	278	30.2612	6.52197
A594_1_01261	hypothetical protein	3.39245	10.53	1	1	1	1	152	16.3154	7.04932
A594_1_02263	N5-carboxyaminoimidazole ribonucleotide mutase	3.3827	14.46	1	1	1	1	166	17.0118	6.37939
A594_1_05869	hypothetical protein	3.38007	3.15	1	1	1	1	444	47.3234	5.19873
A594_1_05880	(R)-phenoxypropionate/alpha-ketoglutarate-dioxygenase	3.36782	9.79	1	1	1	1	286	31.4669	6.27783
A594_1_08148	Zinc-type alcohol dehydrogenase-like protein	3.35657	4.68	1	1	1	1	342	36.3282	6.32861
A594_1_03330	3-oxoacyl-[acyl-carrier-protein] reductase FabG	3.3335	4.17	1	1	1	1	264	27.4351	5.71924
A594_1_06810	3-oxoacyl-[acyl-carrier-protein] reductase FabG	3.32369	5.31	1	1	1	1	245	25.0689	7.50342
A594_1_01888	hypothetical protein	3.31125	2.53	1	1	1	1	475	53.3833	7.84033
A594_1_01313	Acetyl-coenzyme A carboxylase carboxyl transferase subunit beta	3.31057	4.15	1	1	1	1	313	33.6352	6.45557
A594_1_07195	hypothetical protein	3.29366	3.98	1	1	1	1	402	44.1958	6.06201
A594_1_04462	50S ribosomal protein L30	3.28684	17.46	1	1	1	1	63	7.04987	9.979
A594_1_02128	hypothetical protein	3.27636	13.45	1	1	1	1	171	17.7484	4.50049
A594_1_01713	Glucose-1-phosphate adenylyltransferase	3.27622	3.33	1	1	1	1	420	47.2111	6.53662
A594_1_04849	hypothetical protein	3.27582	4.26	1	1	1	1	376	40.4498	5.74463
A594_1_04805	Protein YeeZ	3.27562	5.8	1	1	1	1	293	32.0483	5.69385
A594_1_01843	Succinate dehydrogenase flavoprotein subunit	3.26445	2.35	1	1	1	1	596	65.3962	6.25244
A594_1_05469	Cytochrome c551 peroxidase	3.25942	3.14	1	1	1	1	350	38.2423	6.11279
A594_1_05924	2-haloacrylate reductase	3.25905	3.95	1	1	1	1	329	34.3473	5.41455
A594_1_03514	Dipeptide transport system permease protein DppB	3.22464	7.83	1	1	1	1	345	38.0232	9.45166
A594_1_00895	hypothetical protein	3.21813	4.76	1	1	1	1	420	45.0051	6.7124
A594_1_03038	Ornithine lipid N-methyltransferase	3.21556	9.05	1	1	1	1	199	22.1148	9.37842
A594_1_03858	NAD-dependent dihydropyrimidine dehydrogenase subunit PreA	3.21346	3.52	1	1	1	1	426	46.5829	5.73193
A594_1_06992	N-carbamoyl-D-amino acid hydrolase	3.21077	5.48	1	1	1	1	292	32.283	5.51611
A594_1_02163	ATP synthase subunit delta	3.20657	5.38	1	1	1	1	186	19.6727	9.86182
A594_1_04183	Cyclic-di-GMP-binding biofilm dispersal mediator protein	3.1994	11.38	1	1	1	1	246	24.7146	5.59229
A594_1_01016	hypothetical protein	3.18323	6.07	1	1	1	1	346	36.8439	5.22412
A594_1_04488	hypothetical protein	3.17598	6.25	1	1	1	1	208	23.149	8.04541
A594_1_02584	Enoyl-[acyl-carrier-protein] reductase [NADH] FabI	3.16995	3.58	1	1	1	1	279	29.6923	6.63916
A594_1_02165	ATP synthase gamma chain	3.16962	5.14	1	1	1	1	292	31.9071	9.64209
A594_1_05831	30S ribosomal protein S2	3.14635	11.41	1	1	1	1	263	28.4726	5.66846
A594_1_03823	hypothetical protein	3.1444	11.85	1	1	1	1	135	14.1844	5.50342
A594_1_05784	hypothetical protein	3.14422	5.76	1	1	1	1	191	20.6077	6.52197
A594_1_01773	Bifunctional protein FolD protein	3.1435	5.63	1	1	1	1	284	28.8527	7.91357
A594_1_07006	Octaprenyl diphosphate synthase	3.13958	3.48	1	1	1	1	345	37.1572	5.16064
A594_1_06802	hypothetical protein	3.13905	3.53	1	1	1	1	312	33.7058	5.40186
A594_1_06321	Glutathione-binding protein GsiB	3.13676	4.48	1	1	1	1	536	58.2304	5.18604
A594_1_00015	Pyridoxal 4-dehydrogenase	3.13078	5.13	1	1	1	1	312	33.7973	6.29053
A594_1_07434	Modulator of FtsH protease HflK	3.12922	3.67	1	1	1	1	381	41.1861	5.51611
A594_1_02516	2,3-diketo-L-gulonate-binding periplasmic protein YiaO	3.12317	5.06	1	1	1	1	336	36.1599	5.56689
A594_1_00447	Glutathione S-transferase GST-4.5	3.1213	4.85	1	1	1	1	206	22.7617	6.20166
A594_1_06974	Diaminopimelate decarboxylase	3.12097	2.08	1	1	1	1	432	46.264	6.65381
A594_1_06663	Lipoyl synthase	3.11985	3.36	1	1	1	1	327	35.7674	7.81104
A594_1_01871	Ornithine carbamoyltransferase, anabolic	3.07713	4.22	1	1	1	1	308	34.2554	5.57959
A594_1_03894	hypothetical protein	3.07599	3.41	1	1	1	1	352	38.9239	5.60498
A594_1_01726	1-deoxy-11-beta-hydroxypentalenate dehydrogenase	3.07134	5.61	1	1	1	1	285	30.4836	6.31592
A594_1_02810	Methylthioribose kinase	3.05821	2.8	1	1	1	1	428	47.1674	6.59521
A594_1_00141	Benzoate--CoA ligase	3.05554	2.94	1	1	1	1	545	59.1092	5.99854
A594_1_07079	N-acetylneuraminate lyase	3.03756	4.65	1	1	1	1	301	31.3203	6.53662
A594_1_05795	hypothetical protein	3.03327	6.19	1	1	1	1	226	24.9636	6.63916
A594_1_01301	2-(hydroxymethyl)glutarate dehydrogenase	3.03208	7.46	1	1	1	1	295	29.8886	7.7085
A594_1_07246	D-aminopeptidase	3.03151	6.25	1	1	1	1	272	28.5657	6.30322
A594_1_05003	hypothetical protein	3.03005	4.21	1	1	1	1	214	23.4304	6.41748
A594_1_05698	1-deoxy-D-xylulose-5-phosphate synthase	3.00788	1.88	1	1	1	1	638	67.8109	6.63916
A594_1_01647	Periplasmic nitrate reductase, electron transfer subunit	2.9994	6.79	1	1	1	1	162	17.8919	6.99072
A594_1_03899	Phosphoenolpyruvate-dependent phosphotransferase system	2.98596	1.97	1	1	1	1	760	82.176	6.06201
A594_1_02373	hypothetical protein	2.97504	1.84	1	1	1	1	652	71.4953	5.99854
A594_1_01382	Ribose-5-phosphate isomerase B	2.97144	8.78	1	1	1	1	148	15.5758	5.94775
A594_1_00350	30S ribosomal protein S21	2.97023	13.43	1	1	1	1	67	8.3356	11.4438
A594_1_05534	hypothetical protein	2.96873	5.19	1	1	1	1	289	31.7451	6.56592
A594_1_06911	hypothetical protein	2.96802	3.47	1	1	1	1	519	55.9275	5.79541
A594_1_04168	Glutathione hydrolase-like YwrD proenzyme	2.96219	1.66	1	1	1	1	601	65.5282	6.17627
A594_1_00057	hypothetical protein	2.9588	5.29	1	1	1	1	208	23.0273	4.39893
A594_1_01612	Trans-aconitate 2-methyltransferase	2.95815	9.77	1	1	1	1	266	29.4045	8.22119
A594_1_08214	Linear gramicidin synthase subunit B	2.95329	3.77	1	1	1	1	292	31.1891	4.90674
A594_1_06801	Guanylate kinase	2.94129	5.21	1	1	1	1	211	23.142	6.354
A594_1_00976	hypothetical protein	2.93536	11.3	1	1	1	1	115	12.4303	5.16064
A594_1_06826	putative 3-hydroxyisobutyrate dehydrogenase	2.93328	5.05	1	1	1	1	297	30.0853	7.00537
A594_1_00019	hypothetical protein	2.93017	7.89	1	1	1	1	190	20.7256	5.31299
A594_1_02330	Protein tas	2.91462	3.18	1	1	1	1	346	37.8373	7.00537
A594_1_07110	hypothetical protein	2.91407	4.1	1	1	1	1	390	40.3237	6.0874
A594_1_02142	Methylmalonyl-CoA mutase	2.90426	2.79	1	1	1	1	717	76.3464	5.32568
A594_1_00523	hypothetical protein	2.88424	15.18	1	1	1	1	112	11.7652	8.96826
A594_1_04149	4-deoxy-L-threo-5-hexosulose-uronate ketol-isomerase	2.88255	4.23	1	1	1	1	284	30.9515	6.39209
A594_1_05273	3-oxoacyl-[acyl-carrier-protein] reductase FabG	2.86937	4.12	1	1	1	1	267	28.6409	6.80029
A594_1_04174	hypothetical protein	2.86893	7.19	1	1	1	1	306	33.8121	8.57275
A594_1_06794	Caffeine dehydrogenase subunit alpha	2.86842	1.55	1	1	1	1	773	82.138	5.23682
A594_1_07098	GTP 3',8-cyclase	2.85921	2.61	1	1	1	1	383	43.1966	8.33838
A594_1_02271	hypothetical protein	2.85817	32.73	1	1	1	1	55	6.42253	7.51807
A594_1_06150	hypothetical protein	2.85315	4.49	1	1	1	1	245	25.3674	7.43018
A594_1_01734	Macrolide export protein MacA	2.84874	4.41	1	1	1	1	408	42.6099	6.44287
A594_1_01213	hypothetical protein	2.84582	6.11	1	1	1	1	262	28.7797	5.59229
A594_1_06618	hypothetical protein	2.84508	1.9	1	1	1	1	420	45.116	7.31299
A594_1_01969	Inositol 2-dehydrogenase/D-chiro-inositol 3-dehydrogenase	2.8378	1.66	1	1	1	1	662	70.9464	6.72705
A594_1_04736	hypothetical protein	2.82685	3.65	1	1	1	1	329	37.0089	6.53662
A594_1_05936	hypothetical protein	2.81433	6.29	1	1	1	1	143	15.5081	6.52197
A594_1_03455	hypothetical protein	2.81055	3.25	1	1	1	1	461	47.989	5.19873
A594_1_06903	putative 5-dehydro-4-deoxyglucarate dehydratase	2.80982	3.21	1	1	1	1	312	33.6593	5.77002
A594_1_07470	Succinyl-diaminopimelate desuccinylase	2.79986	3.56	1	1	1	1	393	41.4381	5.60498
A594_1_01318	Orotidine 5'-phosphate decarboxylase	2.79586	4.8	1	1	1	1	250	25.5347	5.98584
A594_1_03932	Protein ApaG	2.782	11.54	1	1	1	1	130	14.7113	6.06201
A594_1_02968	Alpha-D-ribose 1-methylphosphonate 5-phosphate C-P lyase	2.77085	5.1	1	1	1	1	314	34.9523	6.26514
A594_1_04101	hypothetical protein	2.76791	1.69	1	1	1	1	712	76.7314	6.46826
A594_1_04478	50S ribosomal protein L23	2.76658	9.26	1	1	1	1	108	11.6756	10.521
A594_1_00942	D-galactonate dehydratase	2.76145	3.38	1	1	1	1	385	42.8008	6.34131
A594_1_06758	dCTP deaminase	2.74678	8.7	1	1	1	1	184	20.7805	6.55127
A594_1_01862	ATP-dependent Clp protease ATP-binding subunit ClpA	2.74316	1.92	1	1	1	1	780	85.3776	6.48096
A594_1_07885	hypothetical protein	2.73712	5.54	1	1	1	1	271	29.2502	6.53662
A594_1_05238	putative chaperone CsaA	2.72791	12.61	1	1	1	1	111	12.0165	6.72705
A594_1_00269	Alcohol dehydrogenase	2.71925	7.23	1	1	1	1	346	36.8406	6.52197
A594_1_04037	Beta-lactamase hydrolase-like protein	2.71574	5.57	1	1	1	1	305	32.9277	5.65576
A594_1_07670	Arginine--tRNA ligase	2.7068	2.55	1	1	1	1	588	64.1659	5.51611
A594_1_08058	Spore protein SP21	2.69345	9.85	1	1	1	1	132	15.166	6.58057
A594_1_05214	Bifunctional homocysteine S-methyltransferase/5,10-methylenetetrahydrofolate reductase	2.67889	4.14	1	1	1	1	338	35.3699	5.32568
A594_1_04484	30S ribosomal protein S7	2.67386	7.69	1	1	1	1	156	17.7493	10.1841
A594_1_05957	Acetyl esterase	2.66617	5.1	1	1	1	1	314	34.2825	5.78271
A594_1_01973	hypothetical protein	2.66442	4.63	1	1	1	1	216	24.3117	5.5415
A594_1_06366	hypothetical protein	2.6587	9.32	1	1	1	1	161	18.0407	8.89502
A594_1_04476	30S ribosomal protein S19	2.65804	15.22	1	1	1	1	92	10.5316	10.4185
A594_1_04319	Lactate racemase	2.65383	2.56	1	1	1	1	430	46.1351	6.03662
A594_1_04841	Gluconolactonase	2.65147	3.73	1	1	1	1	322	35.0824	5.18604
A594_1_03050	Regulator of nucleoside diphosphate kinase	2.65005	8.82	1	1	1	1	136	14.3945	5.51611
A594_1_03822	Sulfur carrier protein adenylyltransferase	2.64862	3.73	1	1	1	1	268	28.6499	6.1001
A594_1_02554	Acylamidase	2.64778	2.98	1	1	1	1	470	48.671	5.2749
A594_1_02045	Beta-alanine degradation protein BauB	2.6477	12.15	1	1	1	1	107	11.9909	6.03662
A594_1_04370	hypothetical protein	2.64719	2.21	1	1	1	1	679	73.497	5.41455
A594_1_04610	hypothetical protein	2.64224	6.96	1	1	1	1	158	17.9922	8.67529
A594_1_01417	5-oxoprolinase subunit C	2.63982	4.94	1	1	1	1	324	34.6675	6.39209
A594_1_00784	5-keto-D-gluconate 5-reductase	2.63884	4.35	1	1	1	1	253	26.7	6.69775
A594_1_04251	Glutamine synthetase	2.6361	2.99	1	1	1	1	435	48.301	6.37939
A594_1_06953	hypothetical protein	2.62335	17.86	1	1	1	1	112	12.3923	4.91943
A594_1_05850	putative protein	2.62071	4.23	1	1	1	1	284	31.1488	6.44287
A594_1_08027	hypothetical protein	2.60369	1.29	1	1	1	1	1010	113.325	6.12549
A594_1_05533	hypothetical protein	2.60284	4.41	1	1	1	1	340	39.1469	5.8335
A594_1_05875	D-aminoacylase	2.59557	2.69	1	1	1	1	484	51.6534	6.1001
A594_1_04237	Cytidylate kinase	2.59293	6.07	1	1	1	1	214	22.733	5.99854
A594_1_01308	hypothetical protein	2.59046	9.24	1	1	1	1	119	12.4202	4.22119
A594_1_06843	hypothetical protein	2.58449	2.74	1	1	1	1	365	38.7054	7.02002
A594_1_06720	putative xanthine dehydrogenase subunit A	2.57849	7.63	1	1	1	1	236	24.4722	7.28369
A594_1_04479	50S ribosomal protein L4	2.57258	4.85	1	1	1	1	206	22.3252	10.2427
A594_1_05405	hypothetical protein	2.57049	3.69	1	1	1	1	271	29.0819	6.34131
A594_1_01290	Glucose-1-phosphate thymidylyltransferase	2.56704	3.36	1	1	1	1	298	32.5255	5.38916
A594_1_07576	hypothetical protein	2.56403	3.25	1	1	1	1	338	36.1943	6.15088
A594_1_04121	4-hydroxy-tetrahydrodipicolinate reductase	2.56388	3.96	1	1	1	1	278	28.5069	6.81494
A594_1_00776	hypothetical protein	2.55214	12.9	1	1	1	1	93	9.50764	5.0083
A594_1_01220	hypothetical protein	2.5459	12.21	1	1	1	1	131	14.1252	8.04541
A594_1_07223	Ribose import binding protein RbsB	2.53615	3.66	1	1	1	1	328	33.9908	5.74463
A594_1_08163	putative transcriptional regulatory protein pdtaR	2.53145	7.69	1	1	1	1	130	14.0495	6.56592
A594_1_06158	Deacetylase	2.52839	5.21	1	1	1	1	384	40.0979	6.02393
A594_1_04058	hypothetical protein	2.5268	5.04	1	1	1	1	278	30.9579	5.96045
A594_1_05737	hypothetical protein	2.51549	3.29	1	1	1	1	304	32.1808	5.35107
A594_1_04392	putative FAD-linked oxidoreductase	2.50093	1.91	1	1	1	1	470	49.0358	5.63037
A594_1_00233	putative protein	2.4981	3.64	1	1	1	1	302	32.8064	5.71924
A594_1_00552	DNA topoisomerase 1	2.49653	1.47	1	1	1	1	883	97.3439	8.89502
A594_1_03066	Alanine--tRNA ligase	2.49493	5.39	1	1	1	1	241	25.318	5.47803
A594_1_07095	Intermembrane phospholipid transport system lipoprotein MlaA	2.48559	3.48	1	1	1	1	287	30.3244	5.09717
A594_1_00992	Putative D-alanyl-D-alanine carboxypeptidase	2.48185	4.76	1	1	1	1	336	36.4433	8.104
A594_1_00172	hypothetical protein	2.4808	2.83	1	1	1	1	389	41.5245	6.25244
A594_1_01750	hypothetical protein	2.48037	7.87	1	1	1	1	127	14.3266	10.1548
A594_1_06891	Aldehyde oxidoreductase molybdenum-binding subunit PaoC	2.47861	1.28	1	1	1	1	705	74.4574	6.41748
A594_1_04677	4-hydroxy-2-oxo-heptane-1,7-dioate aldolase	2.47732	3.83	1	1	1	1	261	27.5593	5.35107
A594_1_03721	6-carboxy-5,6,7,8-tetrahydropterin synthase	2.47136	7.63	1	1	1	1	118	13.5467	5.65576
A594_1_02941	hypothetical protein	2.46552	1.75	1	1	1	1	1140	116.832	4.25928
A594_1_03348	hypothetical protein	2.46301	4.57	1	1	1	1	197	21.7334	10.1841
A594_1_01794	Diaminopimelate epimerase	2.45889	4.3	1	1	1	1	279	29.5459	5.17334
A594_1_04845	Gluconolactonase	2.45487	3.92	1	1	1	1	306	33.9026	6.27783
A594_1_03411	hypothetical protein	2.45371	5.58	1	1	1	1	394	41.9552	6.60986
A594_1_03655	4-sulfomuconolactone hydrolase	2.4515	3.38	1	1	1	1	296	31.5272	6.62451
A594_1_04889	Ribonuclease BN	2.45134	5.95	1	1	1	1	252	28.7714	6.17627
A594_1_05176	hypothetical protein	2.45133	6.41	1	1	1	1	156	17.84	5.63037
A594_1_00600	hypothetical protein	2.44234	6.06	1	1	1	1	165	17.6522	6.56592
A594_1_02057	Trehalose-6-phosphate phosphatase	2.44107	4.8	1	1	1	1	250	26.359	5.36377
A594_1_02131	Uracil phosphoribosyltransferase	2.4396	4.17	1	1	1	1	216	24.0868	7.81104
A594_1_04132	L-Ala-D/L-Glu epimerase	2.43853	2.74	1	1	1	1	328	34.4067	5.07178
A594_1_01563	hypothetical protein	2.43804	1.76	1	1	1	1	683	70.8533	4.99561
A594_1_02496	Osmoprotectant-binding protein OsmX	2.43428	3.72	1	1	1	1	296	31.8497	5.36377
A594_1_05022	Putative ATP-dependent 6-phosphofructokinase isozyme 2	2.43217	5.23	1	1	1	1	325	33.8636	8.01611
A594_1_03697	Dimethyl sulfoxide/trimethylamine N-oxide reductase	2.41541	1.42	1	1	1	1	775	84.4354	6.03662
A594_1_01159	hypothetical protein	2.40856	4.95	1	1	1	1	182	18.94	9.34912
A594_1_01030	5-dehydro-2-deoxygluconokinase	2.40802	2.35	1	1	1	1	639	69.5294	6.02393
A594_1_05445	hypothetical protein	2.40601	1.08	1	1	1	1	1203	130.013	7.38623
A594_1_06326	Putative hydrolase MhqD	2.4055	4.59	1	1	1	1	218	22.6698	6.53662
A594_1_04850	Galactarate dehydratase (L-threo-forming)	2.40248	2.16	1	1	1	1	509	54.6008	5.85889
A594_1_05683	Protein YciE	2.40206	15.23	1	1	1	1	151	16.7392	4.99561
A594_1_00365	hypothetical protein	2.40126	6.17	1	1	1	1	243	25.9403	5.10986
A594_1_07430	hypothetical protein	2.38696	5.92	1	1	1	1	304	31.6826	5.14795
A594_1_06113	putative hydrolase YcaC	2.38149	9.44	1	1	1	1	180	19.3413	5.21143
A594_1_03498	hypothetical protein	2.37974	15.25	1	1	1	1	59	6.34234	8.88037
A594_1_01279	Inositol 2-dehydrogenase/D-chiro-inositol 3-dehydrogenase	2.37315	3.6	1	1	1	1	389	40.6356	5.94775
A594_1_06465	2-oxo-tetronate isomerase	2.36951	5	1	1	1	1	260	28.5584	5.45264
A594_1_07986	hypothetical protein	2.36709	8.5	1	1	1	1	153	16.5222	5.31299
A594_1_02733	4-hydroxy-3-methylbut-2-enyl diphosphate reductase	2.36605	2.74	1	1	1	1	328	35.2342	5.42725
A594_1_03468	hypothetical protein	2.36478	8.09	1	1	1	1	136	15.0675	5.49072
A594_1_07442	hypothetical protein	2.36256	14.11	1	1	1	1	163	17.908	4.94482
A594_1_06741	Histidinol dehydrogenase	2.35836	2.56	1	1	1	1	430	44.7256	5.61768
A594_1_01946	hypothetical protein	2.35435	6.6	1	1	1	1	288	30.5089	7.37158
A594_1_07444	Peptide deformylase	2.35361	9.6	1	1	1	1	177	19.3742	4.90674
A594_1_02798	putative D,D-dipeptide transport ATP-binding protein DdpF	2.34336	5.28	1	1	1	1	322	35.6386	8.32373
A594_1_04042	30S ribosomal protein S15	2.34186	10.11	1	1	1	1	89	10.3197	10.7114
A594_1_02195	hypothetical protein	2.34006	4.93	1	1	1	1	406	43.3729	7.63525
A594_1_01211	hypothetical protein	2.33901	9	1	1	1	1	100	11.5147	6.78564
A594_1_03489	Type I secretion system membrane fusion protein PrsE	2.33783	2.64	1	1	1	1	416	45.3428	5.56689
A594_1_02106	Protein YhgF	2.33378	1.29	1	1	1	1	855	92.1292	6.93213
A594_1_02132	hypothetical protein	2.32703	11.25	1	1	1	1	80	8.87465	7.50342
A594_1_01229	hypothetical protein	2.32313	5.06	1	1	1	1	158	16.4701	7.09326
A594_1_01536	Transcriptional activator protein CopR	2.31986	5.24	1	1	1	1	229	25.1803	6.11279
A594_1_04404	hypothetical protein	2.31746	7.74	1	1	1	1	155	16.8854	5.8335
A594_1_02657	hypothetical protein	2.31361	4.98	1	1	1	1	281	30.3869	9.24658
A594_1_03125	hypothetical protein	2.31344	12.9	1	1	1	1	124	13.399	5.51611
A594_1_07435	Iron-sulfur cluster carrier protein	2.30548	2.65	1	1	1	1	377	38.8663	6.80029
A594_1_02160	D,L-glycerol 3-phosphate phosphatase	2.30053	3.7	1	1	1	1	297	31.8701	5.18604
A594_1_02272	hypothetical protein	2.29836	6.09	1	1	1	1	197	21.469	5.42725
A594_1_03057	Pyrimidine-specific ribonucleoside hydrolase RihA	2.28016	2.88	1	1	1	1	313	32.78	5.45264
A594_1_04372	hypothetical protein	2.27895	1.95	1	1	1	1	563	61.1795	6.15088
A594_1_04831	Aerobic cobaltochelatase subunit CobN	2.27103	0.92	1	1	1	1	1306	140.523	5.59229
A594_1_06314	D-alanyl-D-alanine carboxypeptidase DacC	2.26808	1.68	1	1	1	1	537	56.1007	7.04932
A594_1_05471	Protein-glutamate methylesterase/protein-glutamine glutaminase	2.26532	3.95	1	1	1	1	304	33.6068	4.98291
A594_1_06064	hypothetical protein	2.25774	1.13	1	1	1	1	1236	134.675	5.78271
A594_1_03397	Nitrogen regulatory protein	2.2434	6.58	1	1	1	1	152	16.5708	6.53662
A594_1_02070	hypothetical protein	2.2431	2.5	1	1	1	1	320	34.5855	6.18896
A594_1_03142	hypothetical protein	2.24164	11.7	1	1	1	1	94	10.3473	6.66846
A594_1_02321	putative protein YphB	2.23574	4.03	1	1	1	1	298	33.3036	5.33838
A594_1_06790	Phosphoribosylglycinamide formyltransferase	2.22997	3.26	1	1	1	1	215	22.2168	7.51807
A594_1_07117	hypothetical protein	2.22113	3.08	1	1	1	1	227	23.3737	5.90967
A594_1_08184	IS21 family transposase ISRel16	2.21262	3.6	1	1	1	1	250	28.2118	7.91357
A594_1_03951	ATP synthase subunit b	2.20548	4.85	1	1	1	1	206	21.7745	5.46533
A594_1_05560	hypothetical protein	2.20339	0.82	1	1	1	1	1215	131.378	6.29053
A594_1_00724	Carboxypeptidase 1	2.20144	2.17	1	1	1	1	506	56.0917	6.06201
A594_1_07018	hypothetical protein	2.19998	0.84	1	1	1	1	716	75.8451	5.87158
A594_1_01929	hypothetical protein	2.19515	1.92	1	1	1	1	417	47.6457	9.5542
A594_1_03195	Maleamate amidohydrolase	2.19503	4.57	1	1	1	1	197	20.2718	7.51807
A594_1_03178	4-hydroxy-tetrahydrodipicolinate synthase	2.19318	4.32	1	1	1	1	301	31.5505	5.49072
A594_1_01687	dITP/XTP pyrophosphatase	2.18923	4.69	1	1	1	1	213	22.8313	5.60498
A594_1_05450	hypothetical protein	2.18797	7.61	1	1	1	1	184	20.1834	5.17334
A594_1_05076	hypothetical protein	2.17834	10.17	1	1	1	1	118	13.5257	6.12549
A594_1_02412	RutC family protein YjgH	2.17782	9.23	1	1	1	1	130	13.7701	5.8208
A594_1_04007	Uroporphyrinogen decarboxylase	2.17292	3.08	1	1	1	1	357	37.854	5.93506
A594_1_05714	2,2-dialkylglycine decarboxylase	2.17133	1.62	1	1	1	1	433	45.5818	5.73193
A594_1_02186	hypothetical protein	2.17028	9.09	1	1	1	1	88	9.11552	8.19189
A594_1_06057	3-[(3aS,4S,7aS)-7a-methyl-1,5-dioxo-octahydro-1H-inden-4-yl]propanoyl:CoA ligase	2.16514	1.79	1	1	1	1	560	60.7598	5.57959
A594_1_01465	Sensor histidine kinase RcsC	2.14643	0.7	1	1	1	1	2006	213.021	6.29053
A594_1_05628	hypothetical protein	2.14103	4.36	1	1	1	1	321	34.6217	6.80029
A594_1_02353	Acetyl esterase	2.13919	2.87	1	1	1	1	314	34.2253	6.01123
A594_1_03992	tRNA modification GTPase MnmE	2.12964	1.59	1	1	1	1	439	46.2256	5.36377
A594_1_03443	hypothetical protein	2.12736	3.44	1	1	1	1	320	33.6399	10.0229
A594_1_08103	hypothetical protein	2.12404	0.8	1	1	1	1	1368	146.037	4.67822
A594_1_03843	N-acetylmuramyl-L-alanine amidase	2.12076	2.97	1	1	1	1	337	36.4331	6.40479
A594_1_00282	50S ribosomal protein L16 3-hydroxylase	2.12025	3.44	1	1	1	1	378	40.837	5.07178
A594_1_02299	Xylose transport system permease protein XylH	2.12014	2.21	1	1	1	1	407	42.9872	9.39307
A594_1_05007	hypothetical protein	2.11891	4.04	1	1	1	1	223	23.2318	6.11279
A594_1_07108	CTP:phosphoglutamine cytidylyltransferase	2.10664	3.17	1	1	1	1	252	28.2346	5.17334
A594_1_04836	hypothetical protein	2.09779	3.28	1	1	1	1	366	39.35	4.97021
A594_1_00256	Methionine aminopeptidase	2.09291	3.3	1	1	1	1	273	29.6699	6.63916
A594_1_04581	Phosphoenolpyruvate carboxylase	2.0912	1.52	1	1	1	1	985	109.02	6.52197
A594_1_03748	hypothetical protein	2.07863	5.52	1	1	1	1	181	19.3648	6.53662
A594_1_03842	Anhydro-N-acetylmuramic acid kinase	2.07815	2.16	1	1	1	1	370	38.2705	5.43994
A594_1_06726	hypothetical protein	2.07318	4.96	1	1	1	1	242	26.0732	5.69385
A594_1_01873	hypothetical protein	2.07084	8.95	1	1	1	1	190	19.7684	9.5542
A594_1_05552	hypothetical protein	2.0706	4.88	1	1	1	1	164	18.3234	5.69385
A594_1_04984	Copper-exporting P-type ATPase	2.06138	1.66	1	1	1	1	601	63.2428	5.69385
A594_1_02012	hypothetical protein	2.05285	3.41	1	1	1	1	176	18.5534	5.80811
A594_1_01568	hypothetical protein	2.05283	7.59	1	1	1	1	158	17.2498	5.03369
A594_1_03750	L-threonine 3-dehydrogenase	2.04998	1.97	1	1	1	1	305	31.8456	5.19873
A594_1_03829	Cellobiose 2-epimerase	2.04652	3.24	1	1	1	1	340	37.5478	6.29053
A594_1_05859	Anthranilate phosphoribosyltransferase	2.04332	3.23	1	1	1	1	341	35.1241	5.38916
A594_1_01181	hypothetical protein	2.04035	2.86	1	1	1	1	454	48.3357	6.48096
A594_1_05808	HTH-type transcriptional regulator MalT	2.03861	0.67	1	1	1	1	889	96.0225	6.53662
A594_1_03779	6-phosphogluconolactonase	2.03684	3.01	1	1	1	1	366	38.3442	6.21436
A594_1_03211	Acyl-CoA thioesterase YbgC	2.03098	11.19	1	1	1	1	143	15.8952	8.55811
A594_1_00614	Arabinose import ATP-binding protein AraG	2.03009	2.84	1	1	1	1	493	52.2575	7.28369
A594_1_04202	Ferredoxin--NADP reductase	2.02976	3.5	1	1	1	1	257	29.1121	6.23975
A594_1_03969	phosphoglycerate mutase GpmB	2.01924	4.12	1	1	1	1	194	21.085	6.34131
A594_1_05804	Methylthioribulose-1-phosphate dehydratase	2.0169	3.05	1	1	1	1	262	28.7175	5.94775
A594_1_02081	hypothetical protein	2.01593	3.25	1	1	1	1	338	34.9354	6.16357
A594_1_01712	Glycogen synthase	2.01146	1.65	1	1	1	1	485	51.3064	5.49072
A594_1_01691	hypothetical protein	2.00834	3.05	1	1	1	1	295	32.1747	6.16357
A594_1_00318	dTDP-glucose 4,6-dehydratase	2.00011	2.19	1	1	1	1	320	36.5544	6.53662
