# Supplementary material for: Secreted Rhizobacterial β-Glucosidase Unlocks Coumarin-Mediated Root Iron Uptake
Source: Research Square preprint supplement (doi:10.21203/rs.3.rs-5909771/v1), 2025-02-20
Supplement: Supplementary file 3 [file 066063a161ea11da220b4c6e.xlsx]

## Sheet: Sheet1
Supplemental Table 5. Co-occurrence matrix based on Pearson’s correlation coefficients between cse-specific metabolic features, and either ASVs or FUNs.
	OTU_25	OTU_60	OTU_372	OTU_151	OTU_201	OTU_50	OTU_15	OTU_951	OTU_618	OTU_65	OTU_1515	OTU_122	OTU_260	OTU_163	OTU_1408	OTU_86	OTU_242	OTU_111	OTU_461	OTU_482	OTU_2077	OTU_327	OTU_431	OTU_243	OTU_580	OTU_876	OTU_414	OTU_496	OTU_299	OTU_68	OTU_95	OTU_1376	OTU_160	OTU_136	OTU_1574	OTU_313	OTU_941	OTU_326	OTU_1221	OTU_365	OTU_219	OTU_221	OTU_1056	OTU_316	OTU_1175	OTU_217	OTU_489	OTU_575	OTU_398
N8419	0.557135	0.726722	0.728968	0.716377	0.899183	0.688635	0.553777	0.700054	0.922102	0.822888	0.808496	0.678824	0.571975	0.808097	0.694955	0.733821	0.678641	0.76502	0.849272	0.734514	0.772622	0.731512	0.766001	0.825661	0.611452	0.658034	0.607342	0.845575	0.638028	0.780268	0.578044	0.892491	0.52279	0.66826	0.709504	0.902268	0.78119	0.686496	0.544767	0.888335	0.702238	0.683206	0.683973	0.74532	0.908185	0.727169	0.77243	0.884657	0.814648
N8448	0.5797	0.529798	0.565801	0.701815	0.86257	0.615498	0.576866	0.553692	0.829712	0.71891	0.794731	0.595062	0.565514	0.726695	0.735252	0.604384	0.586924	0.723176	0.775629	0.533779	0.789259	0.600889	0.743504	0.749532	0.572614	0.584821	0.572211	0.831559	0.600822	0.644833	0.552088	0.792753	0.572825	0.509199	0.541431	0.804294	0.710339	0.643723	0.537688	0.837222	0.582624	0.721434	0.554967	0.662897	0.848387	0.615719	0.703796	0.80293	0.765287
N8749	0.645622	0.616113	0.672261	0.744638	0.948101	0.671154	0.653965	0.602483	0.896201	0.790213	0.88256	0.674722	0.5978	0.821691	0.816753	0.697666	0.686252	0.807819	0.864973	0.607768	0.868117	0.699114	0.783383	0.806145	0.601152	0.701108	0.659143	0.90123	0.645113	0.726482	0.654378	0.887946	0.602836	0.59255	0.651793	0.869605	0.796612	0.726799	0.598084	0.920542	0.650787	0.771801	0.586056	0.761109	0.883424	0.701134	0.749714	0.860821	0.818056
N5469	0.628933	0.591642	0.654155	0.704132	0.929145	0.641229	0.644393	0.566665	0.859656	0.756664	0.861012	0.681571	0.563298	0.80651	0.809202	0.687055	0.685796	0.780736	0.84054	0.582628	0.848422	0.668985	0.739711	0.767824	0.546575	0.696933	0.670062	0.861332	0.601771	0.727505	0.65205	0.87152	0.563552	0.566407	0.645461	0.832831	0.767204	0.704383	0.574198	0.894146	0.627736	0.742357	0.55405	0.736806	0.839574	0.674654	0.719783	0.815629	0.77432
N8693	0.634454	0.586332	0.653368	0.707461	0.926779	0.64427	0.647396	0.56498	0.867219	0.75421	0.863073	0.66864	0.56332	0.798979	0.810261	0.69679	0.687125	0.789781	0.838929	0.578339	0.851222	0.668987	0.740209	0.770716	0.555747	0.703614	0.660347	0.866816	0.606713	0.720039	0.651309	0.869082	0.564132	0.567496	0.642941	0.830062	0.761236	0.705411	0.583431	0.893407	0.62495	0.750279	0.549788	0.73305	0.848104	0.685117	0.726788	0.816256	0.774781
N11848	0.511335	0.437725	0.516387	0.543252	0.706066	0.493404	0.450954	0.471342	0.685626	0.602337	0.691274	0.502903	0.515506	0.568988	0.608094	0.605407	0.47155	0.649989	0.663885	0.383581	0.695004	0.520148	0.614801	0.639789	0.585315	0.510178	0.39149	0.706988	0.484875	0.496721	0.449422	0.651757	0.465956	0.417391	0.497466	0.670097	0.579902	0.552016	0.513425	0.673146	0.473794	0.626712	0.39599	0.587601	0.64377	0.60598	0.591585	0.604101	0.599004
N1878	0.660753	0.658552	0.71139	0.754604	0.943628	0.69075	0.67486	0.602044	0.894985	0.812853	0.856634	0.67901	0.614913	0.847149	0.829641	0.682568	0.711722	0.82317	0.864332	0.646352	0.85677	0.739065	0.78059	0.801149	0.566824	0.6895	0.704679	0.897897	0.660906	0.753746	0.678228	0.890726	0.62137	0.63039	0.638211	0.881815	0.800628	0.746987	0.577127	0.927374	0.672136	0.759409	0.596859	0.773796	0.859904	0.695551	0.753367	0.888115	0.832571
N4710	0.606987	0.560831	0.540865	0.786526	0.788574	0.716249	0.665777	0.550439	0.691511	0.66374	0.741855	0.607662	0.623669	0.723437	0.652135	0.525901	0.64236	0.717445	0.782551	0.504816	0.781211	0.567039	0.643673	0.762844	0.658634	0.604369	0.575036	0.773495	0.732226	0.660276	0.646603	0.690364	0.654269	0.606581	0.513947	0.736752	0.636343	0.683727	0.610056	0.757537	0.676829	0.740248	0.532218	0.645841	0.583395	0.594791	0.711024	0.587828	0.670647
N862	-0.498865	-0.371825	-0.41397	-0.519994	-0.687044	-0.421194	-0.469471	-0.42999	-0.61179	-0.580953	-0.62858	-0.364136	-0.398839	-0.550597	-0.621103	-0.383586	-0.460937	-0.485264	-0.590074	-0.376367	-0.578266	-0.483341	-0.567747	-0.607517	-0.344837	-0.405706	-0.426447	-0.62803	-0.411319	-0.383947	-0.400315	-0.580311	-0.458185	-0.332482	-0.490276	-0.605678	-0.547451	-0.45108	-0.362726	-0.656234	-0.361794	-0.570163	-0.398608	-0.482181	-0.621475	-0.404615	-0.290176	-0.539433	-0.635479
N8091	0.64764	0.624406	0.678844	0.749104	0.949284	0.67495	0.64905	0.613818	0.896293	0.799652	0.881201	0.686809	0.601737	0.829729	0.816636	0.695604	0.682214	0.811682	0.870832	0.614926	0.867569	0.701825	0.784427	0.808911	0.611077	0.688035	0.661393	0.906974	0.654851	0.734584	0.651679	0.892569	0.611881	0.600071	0.650231	0.877439	0.804348	0.730832	0.60084	0.924525	0.657906	0.767104	0.601676	0.767777	0.881148	0.700994	0.753646	0.866288	0.82268
N6659	0.66829	0.551126	0.615923	0.765634	0.855522	0.715408	0.608835	0.590568	0.8986	0.786384	0.785645	0.619511	0.653301	0.712499	0.736454	0.662963	0.667423	0.784575	0.771942	0.622498	0.859114	0.63152	0.786428	0.75252	0.534167	0.590083	0.628161	0.817287	0.678325	0.719407	0.572544	0.800567	0.630067	0.56918	0.538174	0.856872	0.658974	0.68694	0.510518	0.845485	0.696468	0.766802	0.597908	0.62725	0.855375	0.644641	0.811247	0.82697	0.811137
N6727	0.599193	0.677008	0.699348	0.736862	0.941549	0.670838	0.69541	0.618829	0.851496	0.742531	0.895662	0.676882	0.511135	0.881309	0.806851	0.667486	0.720359	0.78503	0.884946	0.651932	0.82093	0.737879	0.714892	0.808838	0.613139	0.80042	0.696589	0.916733	0.660523	0.751021	0.748897	0.901928	0.588207	0.68152	0.746064	0.828876	0.863408	0.744576	0.598198	0.930331	0.661696	0.69344	0.609882	0.833429	0.825518	0.705265	0.729	0.843732	0.763409
N7139	0.637383	0.613376	0.672951	0.733349	0.949158	0.658269	0.635028	0.610076	0.884095	0.795831	0.882221	0.700653	0.594213	0.830349	0.811696	0.69086	0.671929	0.800604	0.869049	0.607757	0.864447	0.691756	0.780187	0.796891	0.601928	0.681278	0.663519	0.898032	0.640253	0.735343	0.644479	0.894582	0.597296	0.584907	0.647881	0.871776	0.80773	0.725622	0.597266	0.920464	0.651198	0.755256	0.594911	0.765862	0.874839	0.689356	0.741437	0.86175	0.814792
N1101	0.626743	0.647188	0.693212	0.742066	0.935376	0.678307	0.618909	0.641043	0.898432	0.811883	0.864932	0.688802	0.60332	0.822632	0.781935	0.706026	0.68055	0.803237	0.867149	0.648705	0.848464	0.711745	0.782537	0.820788	0.61785	0.67954	0.643508	0.88948	0.655105	0.746101	0.629946	0.890016	0.586818	0.612973	0.667237	0.884729	0.801613	0.723815	0.596702	0.913987	0.673994	0.742512	0.616435	0.764032	0.882707	0.711388	0.758071	0.871666	0.81848
N8095	0.653474	0.625082	0.681237	0.752624	0.95229	0.677908	0.652933	0.617666	0.899704	0.803473	0.885621	0.690271	0.605094	0.833444	0.820128	0.698354	0.685039	0.815012	0.874256	0.617273	0.871864	0.704898	0.788166	0.809061	0.612686	0.690099	0.665778	0.911301	0.660559	0.735959	0.65569	0.89625	0.617016	0.603509	0.650971	0.880635	0.806798	0.735916	0.603858	0.928603	0.661591	0.771025	0.6061	0.769532	0.883239	0.70245	0.755321	0.86947	0.826993
N1200	0.470739	0.371035	0.457501	0.47717	0.695899	0.414293	0.446434	0.393455	0.673738	0.532955	0.657015	0.462319	0.315416	0.564784	0.640477	0.568019	0.473958	0.610378	0.614801	0.368624	0.617225	0.451047	0.497999	0.57404	0.416601	0.516029	0.42351	0.676683	0.398991	0.490383	0.42881	0.660549	0.36214	0.357993	0.479325	0.578662	0.559548	0.480815	0.477299	0.6768	0.372499	0.540475	0.392019	0.527151	0.7076	0.540469	0.512102	0.615466	0.548788
N7126	0.583586	0.486931	0.531917	0.717894	0.726828	0.679635	0.513842	0.541088	0.845023	0.719351	0.669454	0.500976	0.557933	0.584242	0.575498	0.586607	0.594298	0.676759	0.656003	0.618774	0.753272	0.537113	0.726194	0.617231	0.429592	0.511816	0.529889	0.679865	0.633144	0.62795	0.456317	0.704601	0.560494	0.519783	0.458444	0.771268	0.548392	0.575703	0.410494	0.726472	0.663022	0.706274	0.591251	0.485996	0.84054	0.542772	0.737672	0.746767	0.785964
N9182	0.641043	0.607861	0.637201	0.769894	0.898055	0.709384	0.615067	0.63836	0.921971	0.798399	0.831893	0.632629	0.634672	0.756541	0.748495	0.678189	0.664002	0.773081	0.817584	0.642946	0.855857	0.675284	0.804293	0.821415	0.593478	0.637654	0.602805	0.862744	0.672469	0.713308	0.589508	0.83701	0.631547	0.594293	0.628526	0.887388	0.733057	0.692094	0.525571	0.889266	0.691284	0.758304	0.626626	0.698734	0.888323	0.680528	0.797624	0.862415	0.822281
N9315	0.642104	0.614271	0.671627	0.731155	0.938119	0.661186	0.636916	0.604153	0.880131	0.791534	0.866963	0.692659	0.59207	0.821234	0.810532	0.689192	0.675974	0.799317	0.858904	0.605951	0.857059	0.688508	0.767289	0.793631	0.589011	0.671135	0.661759	0.888507	0.638283	0.73403	0.64107	0.88337	0.597738	0.586202	0.642146	0.865517	0.789855	0.720056	0.589364	0.912064	0.648885	0.750893	0.59343	0.754731	0.86041	0.687705	0.738914	0.849226	0.805929
N7901	0.469409	0.556443	0.555856	0.708661	0.770334	0.656756	0.544514	0.483397	0.768793	0.666181	0.705256	0.560571	0.455743	0.68403	0.56164	0.510581	0.592672	0.646434	0.711769	0.62477	0.73188	0.543607	0.681616	0.583509	0.447138	0.626229	0.588628	0.680955	0.592448	0.682319	0.550735	0.756229	0.530109	0.560905	0.521938	0.740181	0.687479	0.572368	0.407086	0.740137	0.665586	0.661541	0.561419	0.608212	0.80553	0.501727	0.721066	0.741905	0.766857
N6123	0.523806	0.582309	0.605798	0.658809	0.782674	0.619174	0.483736	0.642491	0.722069	0.719733	0.747808	0.604754	0.727974	0.670256	0.616855	0.612329	0.565426	0.681992	0.757169	0.547447	0.755278	0.646889	0.753837	0.837448	0.726531	0.550166	0.486373	0.766543	0.60624	0.648116	0.529517	0.698056	0.529895	0.543596	0.614165	0.811879	0.672155	0.66395	0.556624	0.737422	0.637725	0.64898	0.487615	0.688893	0.643964	0.679118	0.702066	0.678496	0.657544
N26541	0.632066	0.609352	0.664611	0.743296	0.949519	0.663876	0.637405	0.607874	0.89245	0.791588	0.880113	0.676963	0.592397	0.823282	0.805343	0.683317	0.667914	0.800819	0.867209	0.603231	0.859907	0.686452	0.78402	0.808653	0.614362	0.681246	0.64854	0.902557	0.645092	0.727428	0.636804	0.888392	0.600585	0.586173	0.639456	0.870893	0.802624	0.717231	0.59433	0.91969	0.647988	0.765585	0.5915	0.758622	0.890092	0.688061	0.746902	0.864102	0.822149
N8430	0.596468	0.679999	0.694054	0.749571	0.915516	0.696734	0.574314	0.694106	0.904938	0.826121	0.845326	0.715046	0.646357	0.810995	0.728434	0.721626	0.657884	0.787176	0.865058	0.682497	0.833393	0.713606	0.809297	0.836855	0.668676	0.645635	0.614687	0.879068	0.676845	0.763312	0.596491	0.884488	0.582725	0.631687	0.664159	0.913834	0.7926	0.72629	0.600756	0.899066	0.708686	0.72828	0.666581	0.758281	0.889569	0.728368	0.803464	0.884463	0.816834
N6726	0.621579	0.644125	0.673618	0.77089	0.93093	0.711365	0.635935	0.628617	0.922727	0.798731	0.848883	0.661374	0.570157	0.809696	0.76909	0.692446	0.701088	0.795123	0.853306	0.667307	0.839552	0.679928	0.775542	0.797493	0.584988	0.683027	0.65856	0.876489	0.666877	0.766583	0.627464	0.890156	0.594292	0.632249	0.654887	0.87996	0.773317	0.699358	0.563255	0.907108	0.688378	0.763992	0.653477	0.724129	0.924558	0.686716	0.779945	0.857585	0.841206
N8085	0.6471	0.653493	0.676951	0.79674	0.922159	0.743926	0.672584	0.63962	0.939097	0.795555	0.852909	0.650738	0.565597	0.813393	0.7628	0.704638	0.730787	0.798376	0.853202	0.688097	0.840368	0.686193	0.780423	0.757893	0.571665	0.70892	0.687514	0.879668	0.707879	0.765132	0.660729	0.897726	0.619932	0.676677	0.650323	0.877565	0.754663	0.718879	0.567383	0.907371	0.71302	0.794861	0.697087	0.703092	0.934515	0.684022	0.784961	0.844342	0.8648
N13012	0.491196	0.58496	0.613578	0.619791	0.86649	0.549372	0.61219	0.493992	0.716495	0.629057	0.823644	0.614637	0.423592	0.795683	0.708882	0.586692	0.605677	0.681371	0.815807	0.489786	0.726812	0.617992	0.626721	0.674451	0.581255	0.727187	0.598279	0.806581	0.52873	0.640369	0.661849	0.81881	0.489883	0.567839	0.648499	0.714569	0.787278	0.636333	0.556032	0.809974	0.539719	0.667466	0.477979	0.756619	0.717473	0.604625	0.583312	0.679958	0.686686
N2060	0.631603	0.604266	0.65796	0.729081	0.920851	0.655788	0.62988	0.594997	0.870192	0.77833	0.855341	0.671246	0.586572	0.805735	0.794725	0.674499	0.660774	0.792142	0.844912	0.598817	0.847976	0.682883	0.759844	0.792394	0.592066	0.668219	0.63965	0.881382	0.638406	0.713976	0.632425	0.864512	0.597333	0.578344	0.629657	0.852075	0.784144	0.7119	0.584747	0.900807	0.641986	0.738012	0.579375	0.749834	0.851852	0.68269	0.741054	0.850963	0.793245
N9582	0.41056	0.517987	0.571419	0.543934	0.874303	0.45468	0.526465	0.441596	0.646442	0.588245	0.791251	0.659652	0.391458	0.792264	0.709945	0.579679	0.545489	0.696474	0.813698	0.400233	0.679978	0.537683	0.551953	0.727518	0.625439	0.662026	0.559377	0.791643	0.448049	0.678226	0.585353	0.804707	0.349298	0.459474	0.561159	0.659892	0.772969	0.600156	0.649759	0.785035	0.45316	0.601762	0.37269	0.740453	0.706474	0.611412	0.58426	0.671687	0.585024
N9464	0.533461	0.578444	0.617751	0.612739	0.806622	0.536044	0.544299	0.448547	0.659958	0.687428	0.688165	0.617072	0.51145	0.737291	0.739734	0.55456	0.572495	0.752346	0.761703	0.469731	0.7112	0.617897	0.558481	0.792304	0.547728	0.53684	0.529481	0.754848	0.511494	0.643814	0.541006	0.71741	0.473038	0.457786	0.523052	0.708549	0.710948	0.618869	0.617181	0.77348	0.502117	0.588035	0.378014	0.726075	0.613224	0.638945	0.600908	0.712836	0.607011
N8086	0.591445	0.58822	0.62101	0.743619	0.896105	0.673132	0.603941	0.634	0.894853	0.766962	0.829286	0.627867	0.556977	0.784733	0.715395	0.640958	0.651271	0.740562	0.819026	0.645353	0.798531	0.64848	0.769707	0.768815	0.571746	0.64808	0.631299	0.854568	0.667113	0.720542	0.595854	0.855534	0.578362	0.608546	0.599409	0.846674	0.746633	0.680231	0.525819	0.884344	0.670945	0.726757	0.64162	0.677774	0.90799	0.628881	0.750707	0.860486	0.819736
P20550	0.670979	0.54961	0.613282	0.764452	0.880226	0.701591	0.679762	0.532324	0.880413	0.730565	0.824272	0.588398	0.564743	0.740592	0.795827	0.659298	0.694303	0.801458	0.793255	0.570696	0.860923	0.628948	0.730541	0.742197	0.540408	0.681924	0.641773	0.855139	0.65853	0.695961	0.646872	0.815832	0.634601	0.583628	0.588719	0.809297	0.696732	0.685401	0.545262	0.862128	0.644414	0.782923	0.564316	0.674648	0.845584	0.660036	0.772049	0.781709	0.786674
P58671	0.673284	0.597559	0.642041	0.790896	0.90399	0.728774	0.677952	0.576054	0.903323	0.772904	0.832433	0.63708	0.594903	0.778478	0.799103	0.664223	0.703312	0.812708	0.82192	0.620312	0.873737	0.657937	0.758713	0.776715	0.559194	0.670771	0.66451	0.872978	0.68667	0.740024	0.650852	0.844635	0.657926	0.613067	0.604921	0.854624	0.732358	0.706582	0.54572	0.891994	0.686655	0.779153	0.61318	0.706003	0.863413	0.669807	0.807174	0.830165	0.814553
P28094	0.641864	0.613815	0.668655	0.729435	0.938855	0.659225	0.641236	0.597494	0.878751	0.785227	0.865493	0.690439	0.582324	0.821732	0.822039	0.685982	0.678801	0.798192	0.855611	0.603303	0.85457	0.685515	0.76111	0.791292	0.580684	0.67163	0.668485	0.891023	0.631555	0.736215	0.645452	0.883651	0.598101	0.584501	0.64723	0.862107	0.790532	0.716678	0.585661	0.912846	0.640363	0.746785	0.596998	0.756331	0.862587	0.686815	0.736156	0.845989	0.801555
P7315	0.613842	0.490914	0.518629	0.714941	0.714594	0.669618	0.591612	0.43075	0.775172	0.654039	0.64531	0.495451	0.508067	0.590085	0.66703	0.565993	0.615587	0.713997	0.646654	0.527311	0.755658	0.520289	0.627948	0.600394	0.406565	0.532919	0.549629	0.689499	0.603256	0.604945	0.522675	0.671109	0.589065	0.497619	0.446355	0.707545	0.538398	0.578186	0.469469	0.712326	0.590529	0.707325	0.528899	0.524623	0.741057	0.564113	0.710289	0.666743	0.708864
P92382	0.575355	0.256677	0.294514	0.599924	0.526813	0.531787	0.455714	0.354268	0.693048	0.511515	0.505312	0.266146	0.455253	0.344574	0.563535	0.439634	0.415149	0.553695	0.435339	0.343671	0.634849	0.358219	0.562572	0.505975	0.327945	0.314877	0.321772	0.589773	0.508587	0.33912	0.315682	0.455545	0.572558	0.301491	0.278462	0.572769	0.331253	0.421299	0.323168	0.566569	0.410967	0.608102	0.446236	0.315608	0.670281	0.43841	0.586378	0.562771	0.585912
P57018	0.656258	0.61631	0.669405	0.755127	0.936101	0.683299	0.652039	0.608802	0.895037	0.795424	0.870444	0.677532	0.599179	0.815856	0.808273	0.69248	0.68398	0.807329	0.859769	0.612838	0.865209	0.689464	0.780299	0.78728	0.597593	0.6778	0.661108	0.895721	0.662692	0.726964	0.647205	0.88313	0.620206	0.600961	0.636371	0.871113	0.783306	0.725975	0.59573	0.913072	0.660597	0.776383	0.612194	0.745971	0.877571	0.691182	0.749676	0.848198	0.82672
P63769	0.458724	0.344013	0.443438	0.437324	0.641616	0.395423	0.402763	0.412092	0.701014	0.529644	0.612939	0.399086	0.361515	0.509609	0.52828	0.562017	0.405565	0.54842	0.568489	0.344629	0.573596	0.446906	0.545299	0.490652	0.400917	0.446485	0.360448	0.630771	0.40165	0.411421	0.360074	0.623609	0.37744	0.371065	0.372376	0.585473	0.472179	0.45441	0.356968	0.636904	0.389954	0.568717	0.383052	0.440797	0.69161	0.476988	0.502625	0.627694	0.590353
P79308	0.403411	0.328597	0.395564	0.442826	0.691603	0.372338	0.447109	0.364632	0.686801	0.497813	0.662662	0.372559	0.375866	0.530545	0.534264	0.498357	0.416675	0.488299	0.576033	0.333019	0.594209	0.463985	0.604417	0.529142	0.356549	0.547645	0.387667	0.617106	0.348316	0.38285	0.406106	0.62429	0.348235	0.318711	0.401831	0.580363	0.523381	0.45181	0.324835	0.659002	0.372544	0.592302	0.291194	0.467997	0.72525	0.436428	0.473997	0.670606	0.60117
P66502	0.688199	0.470744	0.514514	0.788297	0.771668	0.733821	0.657227	0.465864	0.849473	0.68541	0.718236	0.520956	0.591348	0.616936	0.73314	0.584219	0.649919	0.756916	0.680477	0.538286	0.854889	0.536995	0.712184	0.655889	0.45083	0.571357	0.597405	0.765074	0.672425	0.641925	0.577815	0.702691	0.695611	0.525825	0.461376	0.769115	0.563719	0.629435	0.450842	0.775637	0.653715	0.776202	0.561744	0.552102	0.789167	0.581151	0.816868	0.725492	0.757131
P89086	0.650959	0.456292	0.550583	0.707045	0.850706	0.622398	0.622359	0.517155	0.81767	0.693643	0.77527	0.569505	0.527414	0.719949	0.781726	0.598914	0.621376	0.776148	0.763499	0.479507	0.789136	0.549949	0.656305	0.745295	0.550661	0.558738	0.599819	0.846334	0.637063	0.665982	0.570128	0.768868	0.587348	0.518455	0.474769	0.748533	0.639641	0.645218	0.558815	0.833245	0.566832	0.726371	0.524189	0.607103	0.793311	0.60019	0.705276	0.740431	0.72253
P21259	0.622071	0.499953	0.545053	0.745118	0.817486	0.679171	0.624748	0.473282	0.845408	0.698788	0.745277	0.548614	0.507673	0.672594	0.706174	0.594168	0.63911	0.735226	0.727884	0.549185	0.807175	0.541991	0.698843	0.634894	0.445418	0.598873	0.602159	0.759204	0.623003	0.652222	0.558962	0.767378	0.600879	0.522449	0.485827	0.763987	0.623154	0.609238	0.483817	0.794646	0.621347	0.773242	0.56238	0.570988	0.849804	0.564296	0.727049	0.738856	0.794665
P59196	0.643249	0.508976	0.54074	0.774825	0.826126	0.709202	0.627033	0.531307	0.86266	0.732128	0.750776	0.52789	0.562672	0.666844	0.698218	0.563185	0.649716	0.70197	0.729647	0.578156	0.812228	0.557046	0.744689	0.683641	0.454381	0.564364	0.600953	0.761034	0.648606	0.650137	0.546271	0.752576	0.646767	0.541285	0.522139	0.803648	0.613477	0.604827	0.429102	0.801189	0.652618	0.789296	0.599985	0.555625	0.842049	0.541624	0.701488	0.721294	0.830328
P38893	0.613958	0.590496	0.641742	0.705607	0.893849	0.636134	0.612988	0.581754	0.846043	0.755579	0.830224	0.646913	0.568067	0.782875	0.771804	0.656938	0.643994	0.765277	0.820433	0.581827	0.816941	0.665643	0.739185	0.76368	0.574182	0.647477	0.623917	0.856432	0.618936	0.690409	0.61528	0.841116	0.579009	0.567623	0.6148	0.828001	0.75805	0.690898	0.565812	0.873144	0.620026	0.72094	0.569859	0.724521	0.828867	0.662253	0.708314	0.818985	0.775235
P59733	0.443898	0.450926	0.49339	0.508556	0.652392	0.4881	0.40216	0.489795	0.711368	0.615284	0.616831	0.432525	0.527486	0.53022	0.476919	0.483572	0.435654	0.477181	0.57335	0.486258	0.621213	0.535481	0.706646	0.501428	0.377167	0.437491	0.438338	0.587969	0.436243	0.466567	0.393417	0.624054	0.481466	0.438586	0.457348	0.705302	0.531274	0.48369	0.202497	0.6342	0.529561	0.588677	0.454824	0.488671	0.667764	0.422784	0.530337	0.663332	0.698024
P40280	0.640958	0.608902	0.660126	0.731975	0.947231	0.65664	0.66333	0.580935	0.871829	0.767296	0.876936	0.692109	0.554205	0.835433	0.84124	0.672124	0.685705	0.794071	0.85898	0.594263	0.856171	0.677828	0.749236	0.774905	0.567886	0.692816	0.690779	0.900724	0.628305	0.738567	0.671728	0.892056	0.606813	0.588958	0.656204	0.850169	0.804944	0.717056	0.581733	0.920235	0.63074	0.746575	0.602311	0.766855	0.863608	0.674696	0.728692	0.838464	0.798289
P32193	0.488064	0.350721	0.385118	0.717698	0.759818	0.616034	0.558167	0.360682	0.747379	0.567648	0.679475	0.430571	0.453072	0.581101	0.61601	0.413833	0.525157	0.634763	0.639104	0.428203	0.737286	0.380705	0.660686	0.601149	0.451893	0.527199	0.527397	0.694559	0.555865	0.603466	0.477337	0.659275	0.554255	0.414624	0.350516	0.665407	0.565209	0.493307	0.386592	0.700793	0.544273	0.72829	0.449233	0.480258	0.830766	0.423334	0.720245	0.664315	0.726063
P39354	0.643923	0.615307	0.670735	0.743535	0.941677	0.66955	0.644468	0.609562	0.890472	0.792027	0.874934	0.679141	0.597685	0.8219	0.81144	0.688465	0.676263	0.804566	0.862442	0.608782	0.861428	0.694555	0.779056	0.803662	0.606165	0.681595	0.656478	0.90144	0.650679	0.72842	0.646493	0.884299	0.609066	0.594792	0.643881	0.870144	0.796382	0.7247	0.592801	0.917826	0.652481	0.760528	0.597035	0.759771	0.874983	0.693758	0.749565	0.86019	0.815419
P16079	0.622281	0.58457	0.640441	0.706372	0.90365	0.639571	0.625693	0.567356	0.849707	0.750088	0.839457	0.65527	0.564896	0.782213	0.7878	0.673035	0.659469	0.775085	0.824487	0.571316	0.831765	0.657674	0.734521	0.763064	0.5671	0.665253	0.633736	0.856178	0.610113	0.700049	0.625777	0.847173	0.572756	0.560365	0.622663	0.824843	0.752079	0.69185	0.576855	0.875002	0.617335	0.736331	0.558736	0.723198	0.832103	0.671764	0.715163	0.804946	0.770147
P16130	0.613275	0.578955	0.630043	0.701736	0.892414	0.634843	0.620594	0.556211	0.837747	0.73942	0.826951	0.64611	0.557159	0.772337	0.778145	0.658745	0.651024	0.764025	0.813615	0.563421	0.82203	0.646952	0.725241	0.752517	0.558354	0.655613	0.626688	0.844145	0.602758	0.691882	0.618664	0.834997	0.570447	0.553183	0.613178	0.81483	0.743145	0.680889	0.566259	0.863225	0.610404	0.72943	0.552798	0.714573	0.820952	0.659676	0.707478	0.792795	0.762387
P104853	0.577332	0.556874	0.632565	0.605547	0.67617	0.618794	0.447319	0.617481	0.75116	0.710035	0.668657	0.525817	0.601672	0.568882	0.559977	0.690453	0.586806	0.682515	0.674124	0.578282	0.704593	0.613293	0.660601	0.658284	0.580073	0.515589	0.448977	0.680631	0.589367	0.594165	0.47119	0.67363	0.494672	0.568468	0.611021	0.751428	0.548255	0.60526	0.497386	0.664683	0.623257	0.63063	0.544964	0.567931	0.642562	0.671939	0.634164	0.58754	0.66352
P20573	0.678555	0.635568	0.691985	0.761321	0.933847	0.698421	0.664742	0.616948	0.906863	0.806967	0.867944	0.681952	0.603922	0.820152	0.82511	0.715859	0.706264	0.829413	0.862123	0.631828	0.87225	0.710362	0.773049	0.795884	0.59279	0.687009	0.67166	0.903242	0.674572	0.739002	0.661514	0.887692	0.628378	0.620791	0.653279	0.877416	0.781176	0.740073	0.605827	0.920036	0.67101	0.773233	0.623479	0.755333	0.872162	0.716304	0.763364	0.854691	0.823723
P20604	0.579154	0.546412	0.58611	0.698257	0.886832	0.610778	0.560153	0.570101	0.806497	0.746798	0.814805	0.659831	0.585218	0.747073	0.7103	0.628733	0.578932	0.742731	0.824054	0.51122	0.820442	0.601479	0.715418	0.825617	0.634415	0.591503	0.516035	0.820896	0.601598	0.657217	0.533431	0.79518	0.557373	0.489227	0.56906	0.812416	0.733348	0.645884	0.590723	0.847351	0.60942	0.719594	0.496037	0.702793	0.776331	0.643922	0.705213	0.775751	0.732828
P35143	0.69991	0.552155	0.61656	0.745803	0.841692	0.677415	0.697907	0.51201	0.823942	0.722801	0.788035	0.580512	0.532462	0.747493	0.807251	0.631706	0.695684	0.789099	0.774387	0.556423	0.812738	0.63649	0.686454	0.652735	0.479622	0.641237	0.678959	0.834358	0.668624	0.648927	0.663994	0.800265	0.639088	0.588792	0.543789	0.768611	0.67375	0.701701	0.582906	0.837502	0.603911	0.773784	0.589932	0.647478	0.789964	0.628504	0.662642	0.733969	0.78679
P38568	0.561078	0.639278	0.654832	0.724177	0.952297	0.640571	0.68549	0.564816	0.809703	0.705592	0.887695	0.694127	0.504191	0.882304	0.79952	0.629815	0.67792	0.771804	0.888986	0.571249	0.811522	0.675538	0.699231	0.790704	0.638688	0.767845	0.685526	0.907138	0.630514	0.747791	0.728138	0.891848	0.570565	0.632077	0.670416	0.804435	0.852244	0.721064	0.617206	0.912011	0.625048	0.717126	0.563034	0.818959	0.809495	0.667643	0.722932	0.807468	0.74634
P40217	0.491382	0.619055	0.650003	0.64489	0.827354	0.604439	0.55918	0.574367	0.759869	0.682495	0.771952	0.594922	0.498463	0.762413	0.647637	0.62013	0.631047	0.696772	0.789988	0.593413	0.698978	0.643675	0.67138	0.694503	0.596166	0.672535	0.60335	0.782349	0.582473	0.696407	0.613884	0.80728	0.467634	0.623736	0.628039	0.757188	0.731858	0.649118	0.545144	0.783202	0.607719	0.656081	0.548897	0.697389	0.763522	0.63233	0.646245	0.713087	0.719436
P46200	0.627684	0.566551	0.627967	0.73142	0.913638	0.64893	0.639896	0.552687	0.859952	0.748838	0.850797	0.632797	0.531262	0.786124	0.802492	0.646943	0.661209	0.784095	0.826882	0.575063	0.84055	0.642444	0.733689	0.755683	0.558604	0.674178	0.641216	0.871366	0.623321	0.698116	0.630602	0.854743	0.592459	0.558719	0.620383	0.81884	0.77217	0.682639	0.574408	0.886099	0.612975	0.745912	0.571018	0.72351	0.8697	0.653585	0.712881	0.815075	0.794961
P50130	0.580573	0.64558	0.615386	0.725843	0.850078	0.680085	0.624337	0.562696	0.848926	0.736638	0.753495	0.597334	0.560678	0.740223	0.719867	0.60593	0.661823	0.690308	0.765838	0.627023	0.771388	0.657401	0.736334	0.734811	0.474294	0.618922	0.623538	0.779252	0.594464	0.684143	0.594867	0.795138	0.595509	0.585849	0.620156	0.833752	0.6949	0.63667	0.448799	0.832931	0.639679	0.718747	0.612758	0.670902	0.815935	0.612296	0.700265	0.785168	0.787645
P75789	0.340886	0.171801	0.264615	0.456947	0.701369	0.343564	0.398522	0.383369	0.672395	0.446077	0.664507	0.314084	0.344829	0.517573	0.471572	0.330896	0.326636	0.400737	0.550418	0.272336	0.551462	0.320249	0.620654	0.532409	0.395266	0.440362	0.381042	0.633269	0.377573	0.399116	0.336726	0.593008	0.373011	0.28904	0.281324	0.553394	0.497975	0.379345	0.19355	0.650495	0.368766	0.57251	0.309729	0.37059	0.767578	0.263329	0.479618	0.65543	0.618569
P53390	0.533096	0.453112	0.476696	0.623554	0.661079	0.589585	0.585583	0.404902	0.769028	0.546601	0.57767	0.360533	0.330974	0.578733	0.595927	0.503699	0.575224	0.632645	0.586984	0.492113	0.598913	0.48743	0.498685	0.567872	0.335023	0.533462	0.499076	0.670185	0.555044	0.550283	0.499296	0.632149	0.508438	0.541232	0.394544	0.604172	0.473499	0.496054	0.334279	0.695557	0.513831	0.599788	0.49732	0.455926	0.720672	0.482948	0.649099	0.671848	0.633854
P3457	0.562025	0.524432	0.591467	0.643132	0.878549	0.561746	0.582874	0.497485	0.798948	0.678931	0.808825	0.604514	0.455499	0.742837	0.769586	0.663351	0.611369	0.766423	0.799405	0.482713	0.771768	0.587823	0.63291	0.765941	0.574887	0.656939	0.548518	0.83293	0.537646	0.652584	0.570443	0.812449	0.472609	0.486859	0.590287	0.738756	0.724329	0.626809	0.625708	0.837578	0.516916	0.69041	0.470652	0.695751	0.8214	0.672298	0.661423	0.751832	0.688066
P13476	0.639479	0.613065	0.669537	0.730032	0.93606	0.659629	0.635505	0.603043	0.878982	0.788763	0.866091	0.689315	0.59013	0.819123	0.808689	0.687529	0.673285	0.797357	0.856991	0.604434	0.855082	0.687425	0.766812	0.792196	0.590148	0.671247	0.65879	0.888225	0.637094	0.73086	0.64006	0.881566	0.59719	0.585336	0.641781	0.863723	0.789784	0.718385	0.588225	0.910399	0.646664	0.749314	0.592791	0.754484	0.860812	0.687093	0.738322	0.848825	0.804572
P22718	0.65845	0.675734	0.718083	0.767795	0.938202	0.716502	0.645928	0.656999	0.920792	0.830835	0.859493	0.689572	0.613602	0.828315	0.795523	0.733702	0.725132	0.83019	0.875187	0.679735	0.856565	0.729947	0.775202	0.840543	0.611491	0.691799	0.662438	0.893069	0.682609	0.773201	0.647507	0.895741	0.598255	0.648495	0.685681	0.896584	0.783893	0.738269	0.611525	0.921582	0.700035	0.759917	0.640775	0.758026	0.883328	0.73804	0.775965	0.863146	0.827281
P8074	0.633186	0.583857	0.643783	0.709623	0.880512	0.642933	0.647186	0.529098	0.835951	0.740623	0.797361	0.613252	0.553162	0.776951	0.798759	0.638257	0.669559	0.786519	0.798583	0.571204	0.806092	0.664406	0.706228	0.745449	0.52011	0.64532	0.653543	0.844214	0.613719	0.693818	0.633098	0.822068	0.579982	0.568155	0.572769	0.801272	0.726592	0.688829	0.558816	0.863363	0.602914	0.724603	0.537014	0.704213	0.810921	0.651681	0.704913	0.812518	0.76613
P66497	0.634947	0.52511	0.536139	0.752839	0.804203	0.685804	0.627433	0.485804	0.839448	0.698238	0.738222	0.536676	0.546726	0.649112	0.728442	0.597523	0.628277	0.730871	0.717552	0.538869	0.820472	0.569054	0.702021	0.705659	0.47651	0.589649	0.549966	0.770056	0.616341	0.615075	0.553497	0.730832	0.636202	0.503933	0.534247	0.77826	0.62636	0.60907	0.488968	0.795824	0.607848	0.753278	0.552344	0.606475	0.809046	0.607848	0.736424	0.737465	0.756811
P71821	0.649827	0.591377	0.638826	0.760036	0.9042	0.692598	0.644448	0.580101	0.889921	0.771008	0.835122	0.64049	0.585723	0.773802	0.789243	0.669668	0.674455	0.798816	0.823467	0.602013	0.857992	0.655909	0.756362	0.782365	0.574762	0.65744	0.633739	0.869683	0.656951	0.718049	0.623458	0.844891	0.625321	0.584645	0.61131	0.849868	0.743346	0.694724	0.56015	0.88686	0.657674	0.762175	0.595952	0.712851	0.865009	0.674874	0.77489	0.830041	0.803028
P91453	0.666257	0.547463	0.600053	0.76389	0.880811	0.686294	0.675143	0.526224	0.863681	0.731333	0.813707	0.59094	0.563375	0.748772	0.810752	0.634342	0.677181	0.794099	0.790921	0.558521	0.842712	0.623667	0.732458	0.732927	0.535181	0.646662	0.651588	0.861103	0.655079	0.683459	0.636702	0.814223	0.636156	0.565298	0.558842	0.807166	0.702632	0.686123	0.565137	0.862685	0.616972	0.781093	0.57881	0.670913	0.854596	0.645093	0.741258	0.788564	0.794643
P50120	0.665666	0.51768	0.602559	0.720512	0.891238	0.641167	0.665392	0.516499	0.869943	0.730326	0.823802	0.600606	0.54284	0.766522	0.811359	0.627106	0.650302	0.777386	0.7896	0.537122	0.834392	0.62479	0.734588	0.69224	0.495162	0.634324	0.6663	0.863574	0.629649	0.668697	0.630002	0.83267	0.626273	0.551284	0.523476	0.801307	0.708934	0.683369	0.515667	0.879071	0.601024	0.767045	0.556714	0.665242	0.854863	0.604645	0.71656	0.826253	0.803779
P14352	0.642563	0.62087	0.667819	0.743708	0.938307	0.669803	0.66679	0.577183	0.872284	0.767405	0.87114	0.685434	0.566077	0.828651	0.830008	0.687687	0.686073	0.813654	0.862331	0.591515	0.858998	0.683635	0.747784	0.779088	0.596768	0.701212	0.671953	0.902228	0.644043	0.732016	0.672553	0.885782	0.60952	0.598313	0.643859	0.848551	0.799017	0.725338	0.613087	0.912566	0.637145	0.761119	0.594615	0.770455	0.860173	0.697921	0.7484	0.836233	0.79704
P37047	0.575576	0.318673	0.426229	0.645697	0.707973	0.569927	0.508727	0.4726	0.725307	0.597975	0.683431	0.437358	0.545269	0.546691	0.63408	0.504522	0.516315	0.660029	0.62406	0.411517	0.728126	0.443888	0.643601	0.662682	0.529258	0.470771	0.475278	0.726063	0.588773	0.551338	0.461498	0.617119	0.544688	0.424748	0.394941	0.661869	0.512983	0.554659	0.451499	0.688145	0.528582	0.657938	0.438023	0.476415	0.707908	0.512875	0.67202	0.628016	0.637049
P7580	0.626446	0.490004	0.532026	0.741734	0.741173	0.69118	0.638503	0.426284	0.790892	0.647034	0.660137	0.467198	0.500184	0.622886	0.701569	0.551928	0.651412	0.744585	0.664977	0.529292	0.751185	0.527279	0.625126	0.619783	0.4268	0.561408	0.597069	0.72973	0.632846	0.639793	0.566961	0.687894	0.601561	0.543652	0.43435	0.703537	0.545593	0.595558	0.476748	0.733053	0.593645	0.732378	0.530947	0.528862	0.764902	0.562842	0.72563	0.672423	0.727387
P14353	0.661162	0.634795	0.684026	0.760732	0.948971	0.690858	0.676545	0.602617	0.898507	0.794933	0.875863	0.682013	0.58942	0.836276	0.827935	0.695801	0.706482	0.818732	0.870697	0.621018	0.866452	0.704232	0.770385	0.797227	0.589292	0.701769	0.683715	0.905048	0.663768	0.743272	0.673353	0.894402	0.620858	0.6184	0.650496	0.870932	0.794462	0.735161	0.600481	0.925946	0.662803	0.778028	0.610324	0.762321	0.875571	0.699377	0.752472	0.853796	0.825705
P21081	0.683761	0.545158	0.622429	0.696391	0.803979	0.659359	0.682491	0.608913	0.75915	0.680226	0.79597	0.647973	0.539639	0.783518	0.743535	0.632969	0.693561	0.746113	0.784518	0.563566	0.769263	0.636816	0.624183	0.657606	0.553873	0.654363	0.700271	0.839263	0.724964	0.691871	0.720391	0.786832	0.62574	0.679368	0.578262	0.733362	0.660641	0.744953	0.570166	0.822211	0.659306	0.672519	0.621141	0.658211	0.634701	0.617415	0.676713	0.668864	0.675592
P29582	0.662672	0.400285	0.458893	0.789704	0.773631	0.710574	0.698725	0.397704	0.828632	0.628129	0.705136	0.407445	0.508176	0.610292	0.727794	0.492843	0.660391	0.712943	0.653029	0.493815	0.789986	0.479041	0.69282	0.575253	0.378731	0.577226	0.644824	0.748482	0.655714	0.60694	0.588686	0.690174	0.664502	0.521308	0.384663	0.704216	0.52259	0.587189	0.413172	0.750999	0.591498	0.824648	0.539367	0.464656	0.841261	0.479484	0.710389	0.668883	0.803633
P54187	0.543418	0.311318	0.391157	0.605952	0.73429	0.505059	0.508178	0.486676	0.730347	0.573583	0.722953	0.43659	0.497049	0.580472	0.687361	0.457136	0.476467	0.583761	0.61422	0.412206	0.702249	0.465738	0.683669	0.632919	0.475488	0.47787	0.514915	0.767327	0.535324	0.505792	0.483009	0.648717	0.556021	0.397552	0.44591	0.671729	0.58597	0.549213	0.383986	0.730659	0.463932	0.608717	0.494136	0.516705	0.769716	0.468023	0.603898	0.699227	0.651264
P7719	0.637588	0.614841	0.661853	0.712012	0.928218	0.651408	0.665705	0.579856	0.857584	0.749804	0.860545	0.687934	0.542163	0.827091	0.837779	0.677832	0.701724	0.778321	0.841536	0.601615	0.836226	0.680936	0.725953	0.759191	0.538148	0.700152	0.704685	0.881861	0.614916	0.742346	0.684113	0.881	0.587444	0.59981	0.673406	0.833758	0.782632	0.714832	0.56709	0.904951	0.625852	0.723	0.604575	0.754915	0.835197	0.675453	0.714565	0.812707	0.770034
P31408	0.653628	0.632622	0.6878	0.75666	0.950227	0.68414	0.652694	0.619354	0.905346	0.806599	0.881359	0.685986	0.597716	0.831806	0.812566	0.71001	0.690508	0.824078	0.877526	0.622332	0.867456	0.705254	0.780482	0.811147	0.618372	0.693783	0.657401	0.90927	0.666278	0.737847	0.651149	0.898188	0.609244	0.610905	0.649563	0.878811	0.801111	0.734481	0.617881	0.926679	0.664347	0.776841	0.608893	0.764796	0.889845	0.712316	0.757845	0.866257	0.829826
P24320	0.647791	0.529382	0.549213	0.817847	0.767188	0.78052	0.720624	0.451326	0.833275	0.645609	0.686535	0.450713	0.47716	0.654071	0.699655	0.557849	0.743451	0.764322	0.695196	0.59327	0.772073	0.536116	0.615856	0.65325	0.431282	0.655926	0.648085	0.745197	0.701516	0.705413	0.642444	0.710727	0.63536	0.641441	0.497156	0.711191	0.546534	0.611	0.466059	0.756872	0.669058	0.774486	0.580132	0.529153	0.786162	0.571639	0.778606	0.645742	0.753489
P31446	0.633269	0.562548	0.612682	0.752678	0.896788	0.677137	0.650718	0.544986	0.862742	0.739573	0.825796	0.620265	0.583906	0.767023	0.79072	0.634997	0.660963	0.7881	0.808574	0.567362	0.846198	0.634062	0.749746	0.764578	0.571695	0.653275	0.642597	0.865013	0.645105	0.707835	0.630593	0.826641	0.61979	0.567655	0.571533	0.825344	0.732518	0.688689	0.554623	0.871357	0.634858	0.762819	0.562989	0.700958	0.851453	0.649785	0.769078	0.816305	0.78785
P63079	0.632469	0.606891	0.660281	0.730198	0.924625	0.65761	0.633128	0.596924	0.873039	0.778714	0.858599	0.669131	0.585871	0.807586	0.796224	0.678192	0.664667	0.791428	0.84826	0.597409	0.846125	0.682578	0.763311	0.787622	0.594877	0.670102	0.64362	0.883461	0.638354	0.71447	0.634667	0.86903	0.596722	0.583322	0.63233	0.85402	0.782419	0.711955	0.586885	0.900586	0.640359	0.748527	0.585463	0.746999	0.857872	0.68304	0.73388	0.842743	0.801054
P22297	0.540403	0.522663	0.587376	0.63046	0.860454	0.558933	0.58676	0.447292	0.752061	0.64879	0.778291	0.607906	0.469898	0.73227	0.759243	0.640168	0.612633	0.768304	0.784454	0.452625	0.767993	0.572553	0.600579	0.765324	0.570965	0.658598	0.551454	0.80075	0.514553	0.669619	0.582221	0.780245	0.456734	0.474941	0.562835	0.712277	0.703165	0.619567	0.618909	0.8061	0.515582	0.676072	0.403157	0.699221	0.750289	0.665543	0.68158	0.714707	0.639953
P58662	0.635392	0.553226	0.585264	0.758259	0.838876	0.690737	0.643505	0.513971	0.828979	0.710669	0.779725	0.603932	0.566108	0.720283	0.763145	0.61768	0.648001	0.773261	0.766573	0.556543	0.8324	0.598478	0.718007	0.694789	0.54304	0.622652	0.627041	0.824459	0.652136	0.681104	0.619256	0.786226	0.639603	0.560824	0.542868	0.795051	0.688657	0.670529	0.550025	0.822515	0.630997	0.754884	0.585097	0.665683	0.81251	0.633142	0.765698	0.758633	0.766816
P52815	0.652466	0.621974	0.679184	0.75063	0.951102	0.675924	0.652888	0.616158	0.897702	0.800467	0.885044	0.689095	0.605473	0.832764	0.820344	0.695861	0.683597	0.813732	0.872369	0.614841	0.871186	0.703892	0.786989	0.809364	0.612447	0.690013	0.66609	0.91142	0.659516	0.735552	0.656682	0.894123	0.616841	0.602541	0.649105	0.878563	0.805893	0.735784	0.600952	0.927913	0.660461	0.767964	0.602648	0.769407	0.879959	0.700771	0.756752	0.869789	0.823143
[truncated: 221 more columns]
