# Supplementary material for: Secreted Rhizobacterial β-Glucosidase Unlocks Coumarin-Mediated Root Iron Uptake
Source: Research Square preprint supplement (doi:10.21203/rs.3.rs-5909771/v1), 2025-02-20
Supplement: Supplementary file 4 [file 09028b6da6e0b54df6e5d46c.xlsx]

## Sheet: Sheet1
Supplemental Table 10 List of oligonucleotides used in this study
Name	Sequence	Description
CSE-DT1-BsF	ATATATGGTCTCGATTG TGAGTGAAGAGCTTGCCGTT GTT	CRISPR/Cas9-mediated-CSE-knockout
CSE-DT1-F0	TG TGAGTGAAGAGCTTGCCGTT GTTTTAGAGCTAGAAATAGC	CRISPR/Cas9-mediated-CSE-knockout
CSE-DT2-R0	AAC CTGTCCCGTGCGCCGTAAAC CAATCTCTTAGTCGACTCTAC	CRISPR/Cas9-mediated-CSE-knockout
CSE-DT2-BsR	ATTATTGGTCTCGAAAC CTGTCCCGTGCGCCGTAAAC C	CRISPR/Cas9-mediated-CSE-knockout
PalgD_F1	cgctctagaactagtggatccAACTGTGGGAGCAGGTAAGC	Subcloning of A594_07591 in to pBBR1MCS-5 with or without algD promoter
PalgD_R1	TTTCTATCCTGTCCATCGCATTTACCTCTTTGTCATTG	Subcloning of A594_07591 in to pBBR1MCS-5 with or without algD promoter
075_pBBR1_bamhi_F1	cgctctagaactagtggatccATGGACAGGATAGAAACCCTGTTG	Subcloning of A594_07591 in to pBBR1MCS-5 with or without algD promoter
075_pBBR1_hindiii_R1	gtcgacggtatcgataagcttCAACAGTTCTTTCCGGTCAGCT	Subcloning of A594_07591 in to pBBR1MCS-5 with or without algD promoter
07591_ATG_F	ATGGACAGGATAGAAACCCTGTTG	Subcloning of A594_07591 in to pBBR1MCS-5 with or without algD promoter
A594_1_07591_pET28a_F	cagcaaatgggtcgcggatccATGGATCGTATCGAAACCCTG	Protein Expression
A594_1_07591_pET28a_R	ctcgagtgcggccgcaagcttTCAGATCTCGACCTTGATCGTC	Protein Expression
