# Supplementary material for: Secreted Rhizobacterial β-Glucosidase Unlocks Coumarin-Mediated Root Iron Uptake
Source: Research Square preprint supplement (doi:10.21203/rs.3.rs-5909771/v1), 2025-02-20
Supplement: Supplementary file 5 [file 1769e52bf4b6b4bacba25d30.xlsx]

## Sheet: Sheet1
Supplemental Table 2. Index of CAS prosperity.
				Samples		CP-1	CP-2	CP-3	CP-4	CP-5	CP-6	CP-7	CP-8
				Types		Soil configuration profile sample						Topsoil
				Sampling depth(cm)		0-10	18-25	38-45	58-65	82-87	102-105	0-20	20-40
Index of CAS prosperity		Testing item	Method	Detection limit	Unit	Soil sample
Physical and chemical properties		Volumetric weight	NY/T 1121.4-2006		g/cm3	1.35	1.5	1.69	1.56	1.6	1.61
		Sand 2-0.05mm	LY/T 1225-1999	-	g/kg	295	260	250	178	226	310	255	295.667
		Silt 0.05-0.002mm		-	g/kg	501	522	533	518	485	449	525.333	492.333
		Clay <0.002mm		-	g/kg	204	218	217	304	289	241	219.667	212
		Texture		-	-	Silt loam	Silt loam	Silt loam	Silty clay loam	Clay loam	Loam	Silt loam	Silt loam
		pH	NY/T 1121.2-2006	-	Dimensionless	7.92	8.4	8.43	8.1	8.39	8.53	8.51	8.53
		Cation exchange capacity	HJ 889-2017	0.05	cmol(+)/kg	-	-	-	-	-	-	16.1667	15.9333
		Total salt content	LY/T 1251-1999(3.2)	-	μS/cm	200.1	138	185.1	180.3	199.4	167.1	169.6	157.767
Nutrients	Total nutrient content of soil	Organic Matter	NY/T 1121.6-2006	1	g/kg	17.6	12.8	7.4	8.3	6.6	5.9	13.1333	13.6333
		Total nitrogen	HJ 717-2014	48	mg/kg	976	732	526	388	504	1400	847.333	811
		Total phosphorus	HJ 632-2011	10	mg/kg	1180	778	590	492	421	404	861.667	857.667
		Total Potassium	NY/T 87-1988	0.002	%	1.42	1.48	1.44	2.25	2.15	2.17	2.15333	2.15
	Soil available nutrients	Hydrolyzable nitrogen	LY/T 1228-2015	4	mg/kg	85.7	62	49.4	71.1	46.7	33.4	77.4667	74.7333
		Available phosphorus	HJ 704-2014	0.5	mg/kg	52.5	12.7	3.9	1.7	1.8	1.3	19.6	16.4
		Available potassium	LY/T 1234-2015	1	mg/kg	139	125	123	157	157	148	102	98
	Total amount of trace elements	Cu	HJ 491-2019	1	mg/kg	-	-	-	-	-	-	31	37.6667
		Zn		1	mg/kg	-	-	-	-	-	-	123	121.667
		B	USEPA 200.8-1994	0.2	mg/kg	-	-	-	-	-	-	3.47333	3.53667
		Se	HJ 680-2013	0.01	mg/kg	-	-	-	-	-	-	0.59	0.216667
		Mo	USEPA 6020B-2014	0.25	mg/kg	-	-	-	-	-	-	0.466667	0.533333
		Ca	USEPA 6010D-2014	25	mg/kg	-	-	-	-	-	-	1.36267e+06	1.91467e+06
		Mg		15	mg/kg	-	-	-	-	-	-	746667	913667
		Fe		10	mg/kg	-	-	-	-	-	-	25700	29366.7
		Mn		2	mg/kg	-	-	-	-	-	-	826.333	768.333
		S		20	mg/kg	-	-	-	-	-	-	18800	19606.7
Environmental quality	Heavy metal elements	Cr	HJ 491-2019	4	mg/kg	-	-	-	-	-	-	64	59.3333
		Ni		3	mg/kg	-	-	-	-	-	-	31.6667	36.3333
		Pb	GB/T 17141-1997	0.1	mg/kg	-	-	-	-	-	-	25.5667	25.4667
		Cd		0.01	mg/kg	-	-	-	-	-	-	0.116667	0.113333
		As	HJ 680-2013	0.01	mg/kg	-	-	-	-	-	-	12.4667	9.26
		Hg		0.002	mg/kg	-	-	-	-	-	-	0.267	0.303333
