# Supplementary material for: Secreted Rhizobacterial β-Glucosidase Unlocks Coumarin-Mediated Root Iron Uptake
Source: Research Square preprint supplement (doi:10.21203/rs.3.rs-5909771/v1), 2025-02-20
Supplement: Supplementary file 6 [file 24c0c6393dd057f105d6cddf.xlsx]

## Sheet: Sheet1
Supplemental Table 12. The acitivity assay of mono-isolate strain from SynCom for glycosylated coumarins.
	Production of scopoletin (µm)	S.D.		Production of fraxetin (µm)	S.D.
A144	3.6896	0.332568		0.9954	0.0292146
A171	7.13963	0.365376		3.2758	0.176705
A173	1.54317	0.110895		0.481	0.0491356
A178	0.0719333	0.00414287		0.0279	0.0266696
A241	14.0418	0.343671		4.5122	0.101333
A255	2.81843	1.3625		0.1974	0.0130615
A320	14.5945	0.559102		10.963	1.91801
A331	0.380833	0.00750355		1.32977	0.203985
A365	1.48097	0.0413195		0.0483	0.00777967
A375	0.0171333	0.00153731		0.029	0.00172143
A376	1.39133	0.0583611		0.0889	0.00152753
A396	7.9757	0.754845		0.1706	0.00549303
A404	1.14827	0.0950816		0.2705	0.0846585
A412	0.5686	0.180629		0.024	0.00289885
A452	13.9707	0.790758		0.2049	0.0130374
A479	0.0207333	0.00811316		0.05	0.00305505
A495	4.24715	0.376959		1.5412	0.192076
A496	0.0166	0.00193132		0.0376	0.00110151
A594	31.9268	1.74535		8.6399	0.547198
A641	1.3491	0.0539323		0.1637	0.0243056
A657	3.9289	0.151325		1.9919	0.0228583
A693	9.2236	0.268176		0.1958	0.0321856
A709	1.7167	0.0675132		0.1521	0.00291033
A713	5.52353	0.204501		0.4761	0.0652948
A729	5.1441	0.899629		4.4971	0.523949
A755	29.0345	0.257175		14.9374	4.76076
A768	24.0922	2.05245		7.1833	6.1851
A779	4.22997	1.24681		0.9687	0.0964445
A792	0.7109	0.0373362		0.0334	0.00687338
A830	5.51937	0.0776973		0.1083	0.0589929
A854	11.1317	1.66733		0.0572	0.00580431
A859	28.7797	0.790333		11.2697	0.748893
A880	1.5081	0.139318		0.0579	0.0205107
A900	0.0253333	0.00943946		0.2975	0.0422887
A910	28.4669	1.58588		43.3108	5.548
A948	6.27137	0.287783		5.896	0.709184
A955	0.0211	0.00672681		0.0905	0.00684178
A964	8.84177	0.443366		11.8877	1.83907
A981	0.0160667	0.00325167		0.0728	0.00865583
