# Supplementary material for: Secreted Rhizobacterial β-Glucosidase Unlocks Coumarin-Mediated Root Iron Uptake
Source: Research Square preprint supplement (doi:10.21203/rs.3.rs-5909771/v1), 2025-02-20
Supplement: Supplementary file 7 [file 3c4ddc0d67137eb7b0837a10.xlsx]

## Sheet: Sheet1
Supplemental Table 14. Concentration of coumarin in roots from Arabidopsis with (right) or without (left) the pre-treatment with glycosidase from almond
nmol/g(FW)	scoplin	fraxin	scopoletin		nmol/g(FW)	Scopoletin	Esculetin	Fraxetin
Col-0/avFe_1	5.03674	0	0.851271		Col-0/avFe_1	5.40042	0.109075	0
Col-0/avFe_2	4.93755	0	0.782979		Col-0/avFe_2	5.88264	0.0997489	0
Col-0/avFe_3	5.25404	0	0.697953		Col-0/avFe_3	5.61373	0.100779	0
cse-2/avFe_1	3.83477	0	0.511844		cse-2/avFe_1	1.03038	0.0499859	0
cse-2/avFe_2	3.85588	0	0.506609		cse-2/avFe_2	1.18763	0.056701	0
cse-2/avFe_3	3.5439	0	0.512542		cse-2/avFe_3	0.938168	0.0523953	0
cse-3/avFe_1	3.06784	0	0.398109		cse-3/avFe_1	0.745326	0.0435	0
cse-3/avFe_2	3.03562	0	0.422766		cse-3/avFe_2	0.880329	0.0462491	0
cse-3/avFe_3	3.1949	0	0.398109		cse-3/avFe_3	0.817975	0.0440621	0
Col-0/LowFe_1	3.32329	1.69871	0.488443		Col-0/LowFe_1	0.735503	0.221649	1.6085
Col-0/LowFe_2	3.24114	1.72273	0.48501		Col-0/LowFe_2	0.624951	0.224223	1.517
Col-0/LowFe_3	3.31374	1.80139	0.571974		Col-0/LowFe_3	0.694591	0.218485	1.5985
cse-2/LowFe_1	2.36004	0.984615	0.338026		cse-2/LowFe_1	0.602985	0.0613396	0.445
cse-2/LowFe_2	2.1812	0.870803	0.316417		cse-2/LowFe_2	0.61779	0.0676055	0.438
cse-2/LowFe_3	2.21588	0.814529	0.326063		cse-2/LowFe_3	0.593208	0.0685268	0.45
cse-3/LowFe_1	2.68924	0.764024	0.210193		cse-3/LowFe_1	0.404497	0.0662822	0.5405
cse-3/LowFe_2	2.83534	0.848457	0.217443		cse-3/LowFe_2	0.43678	0.068214	0.5735
cse-3/LowFe_3	2.81865	0.717245	0.251026		cse-3/LowFe_3	0.490244	0.0674064	0.5555
