# Supplementary material for: Secreted Rhizobacterial β-Glucosidase Unlocks Coumarin-Mediated Root Iron Uptake
Source: Research Square preprint supplement (doi:10.21203/rs.3.rs-5909771/v1), 2025-02-20
Supplement: Supplementary file 8 [file 614e28a19c55c18231798b6a.xlsx]

## Sheet: Sheet1
Supplemental Table 4. Functional pathway analysis of the rhizosphere microbiome
KO	cad45	ccr1	cse	CYP71A13	cyp79b2b3	cyp81f2	cyp82c2	fah	X74f276c4	X74f2	nic	pad31	pen21pad3	pen22	S10934	S13365	WT	description
K00001	0.000440953	0.000492066	0.000450649	0.000438753	0.000511269	0.000399498	0.000460783	0.000467092	0.000381577	0.000422789	0.000434345	0.000389918	0.000439574	0.000489885	0.000467148	0.000431833	0.000444185	alcohol dehydrogenase [EC:1.1.1.1]
K00002	1.95888e-05	3.32305e-05	2.22971e-05	2.24329e-05	1.91394e-05	1.64217e-05	2.46082e-05	2.3501e-05	1.52436e-05	2.17227e-05	2.47678e-05	1.93715e-05	1.59188e-05	1.95415e-05	2.37529e-05	2.10581e-05	1.62169e-05	alcohol dehydrogenase (NADP+) [EC:1.1.1.2]
K00003	0.000203824	0.000199656	0.000203516	0.000205804	0.000193271	0.00020893	0.000200763	0.000203719	0.000213049	0.000207845	0.000202552	0.000205944	0.000199855	0.000194435	0.000200352	0.000200699	0.000203662	homoserine dehydrogenase [EC:1.1.1.3]
K00004	0.000108267	0.000122059	9.61641e-05	0.000107101	0.000103644	9.36083e-05	0.000110282	0.000118971	8.86097e-05	0.000106143	0.000107944	9.64289e-05	8.99125e-05	9.53774e-05	0.000112289	0.000100358	9.09084e-05	(R,R)-butanediol dehydrogenase / meso-butanediol dehydrogenase / diacetyl reductase [EC:1.1.1.4 1.1.1.- 1.1.1.303]
K00005	7.38571e-07	1.752e-06	1.50595e-06	1.05054e-06	4.64104e-07	8.05285e-07	1.37929e-06	1.72112e-06	8.68197e-07	1.19178e-06	8.64413e-07	1.64307e-06	6.7653e-07	1.62249e-06	1.11274e-06	6.29121e-07	8.61081e-07	glycerol dehydrogenase [EC:1.1.1.6]
K00007	0.000112216	8.56967e-05	0.00010738	0.000112246	9.48576e-05	0.000123253	0.000105941	0.00010229	0.000128478	0.000112102	0.000111608	0.000118847	0.00011562	0.000100784	0.000105602	0.000114447	0.000112154	D-arabinitol 4-dehydrogenase [EC:1.1.1.11]
K00008	0.00018486	0.000195894	0.000190335	0.000201485	0.000178591	0.000188441	0.000204425	0.000199372	0.000193769	0.000190077	0.000192373	0.000181962	0.000185679	0.000183188	0.000201559	0.000191792	0.000188576	L-iditol 2-dehydrogenase [EC:1.1.1.14]
K00010	0.000160697	0.000203917	0.000182858	0.000185585	0.000173386	0.00016276	0.000202797	0.000200377	0.000172363	0.000181148	0.0001791	0.000168932	0.000164151	0.000183989	0.000195588	0.000169708	0.000164137	myo-inositol 2-dehydrogenase / D-chiro-inositol 1-dehydrogenase [EC:1.1.1.18 1.1.1.369]
K00012	0.000233098	0.00024568	0.000250846	0.000261733	0.000230133	0.000253978	0.000254015	0.000252151	0.000267473	0.000260337	0.000251429	0.000257136	0.000238526	0.000249864	0.000255587	0.000247964	0.000253705	UDPglucose 6-dehydrogenase [EC:1.1.1.22]
K00013	0.000215546	0.000221499	0.000229536	0.000210215	0.000206908	0.000217065	0.000220881	0.000210497	0.000238439	0.000223249	0.00020983	0.000233929	0.000217597	0.000211743	0.000200541	0.000212507	0.000215764	histidinol dehydrogenase [EC:1.1.1.23]
K00014	0.000309117	0.000284819	0.000322422	0.000305675	0.000285303	0.000324604	0.000310555	0.000298055	0.000343588	0.000316257	0.000307309	0.000330193	0.000318402	0.000298626	0.000295455	0.000319867	0.000326184	shikimate dehydrogenase [EC:1.1.1.25]
K00015	0.000428509	0.0004185	0.000401509	0.000360346	0.000444971	0.00035403	0.000393471	0.00039221	0.000375762	0.000381111	0.000358115	0.000384874	0.000401983	0.000418946	0.000365599	0.000381758	0.000368218	glyoxylate reductase [EC:1.1.1.26]
K00016	3.63825e-05	2.47614e-05	3.28745e-05	2.54551e-05	3.11573e-05	3.1556e-05	2.98032e-05	2.91215e-05	3.79027e-05	3.00745e-05	2.68984e-05	3.5299e-05	3.55565e-05	2.91057e-05	2.41592e-05	3.24618e-05	3.11553e-05	L-lactate dehydrogenase [EC:1.1.1.27]
K00018	0.000214539	0.000194332	0.000196548	0.000207489	0.000225091	0.00020549	0.000202777	0.000211987	0.000196146	0.000203697	0.000206662	0.000200607	0.000214538	0.000217164	0.000212448	0.000208399	0.0002081	glycerate dehydrogenase [EC:1.1.1.29]
K00019	0.00133552	0.00136487	0.00130876	0.00130724	0.00140871	0.00124852	0.00136461	0.00138404	0.00127131	0.00131012	0.0012831	0.00128313	0.00131383	0.00138093	0.00135592	0.00131126	0.00125926	3-hydroxybutyrate dehydrogenase [EC:1.1.1.30]
K00020	0.000826235	0.000780977	0.000880769	0.000963623	0.000781667	0.000975987	0.000906294	0.000881825	0.000996696	0.000924369	0.000925834	0.000920532	0.000904973	0.000884784	0.000943144	0.000932548	0.00094825	3-hydroxyisobutyrate dehydrogenase [EC:1.1.1.31]
K00021	5.63498e-07	7.22339e-07	7.14396e-07	9.40828e-07	5.72373e-07	5.79821e-07	1.21743e-06	1.32247e-06	3.40752e-07	5.76149e-07	5.1359e-07	4.30401e-07	3.81281e-07	4.53731e-07	7.72464e-07	3.4603e-07	6.30255e-07	hydroxymethylglutaryl-CoA reductase (NADPH) [EC:1.1.1.34]
K00023	0.000837109	0.000775611	0.00076463	0.000748616	0.000798852	0.000763128	0.000759171	0.000785555	0.000762511	0.000783956	0.000784365	0.000802595	0.000782445	0.00075208	0.000754497	0.000791098	0.000764449	acetoacetyl-CoA reductase [EC:1.1.1.36]
K00024	0.000187573	0.000196171	0.000192156	0.000194732	0.000189042	0.000193145	0.000195538	0.000192243	0.000195534	0.000193953	0.000192309	0.000191835	0.000188406	0.000186648	0.000194411	0.000190623	0.000187416	malate dehydrogenase [EC:1.1.1.37]
K00027	0.000347985	0.000340492	0.000351411	0.000354673	0.000348031	0.000346974	0.000355113	0.00035263	0.000361438	0.000354241	0.000344617	0.000348766	0.000342425	0.000350717	0.000351349	0.00034665	0.000342092	malate dehydrogenase (oxaloacetate-decarboxylating) [EC:1.1.1.38]
K00029	0.0003082	0.000285322	0.000311341	0.000311568	0.000288723	0.000324585	0.000306176	0.000300644	0.000339082	0.000316552	0.000306848	0.000322369	0.000309847	0.000295773	0.000298676	0.000308033	0.000311506	malate dehydrogenase (oxaloacetate-decarboxylating)(NADP+) [EC:1.1.1.40]
K00030	7.03216e-05	8.56544e-05	9.55438e-05	0.00012553	7.69786e-05	0.000117514	0.000106005	0.000100504	0.000115531	0.00010581	0.000110851	9.91809e-05	9.71058e-05	0.000100295	0.000123047	0.000106257	0.000112808	isocitrate dehydrogenase (NAD+) [EC:1.1.1.41]
K00031	0.000226696	0.000232917	0.000243928	0.000258394	0.000223552	0.00025504	0.000246006	0.000245286	0.000257752	0.000252655	0.000249355	0.000245689	0.000236343	0.000237622	0.000252333	0.000243673	0.000257659	isocitrate dehydrogenase [EC:1.1.1.42]
K00032	5.82527e-05	5.03928e-05	6.98257e-05	7.24701e-05	5.00377e-05	7.84535e-05	6.74038e-05	6.05408e-05	8.3269e-05	6.75646e-05	6.91341e-05	7.18438e-05	7.1683e-05	6.1848e-05	6.78613e-05	7.20691e-05	7.35779e-05	phosphogluconate 2-dehydrogenase [EC:1.1.1.43]
K00033	0.000130141	0.000178271	0.000148969	0.000163799	0.000179317	0.000129246	0.000167009	0.000166939	0.000123323	0.000146123	0.000148534	0.000126264	0.000141644	0.000181889	0.000178564	0.000145068	0.000140335	6-phosphogluconate dehydrogenase [EC:1.1.1.44 1.1.1.343]
K00034	0.00107208	0.00107209	0.00105264	0.0011483	0.00112609	0.00111602	0.0011103	0.00111579	0.00108837	0.00111067	0.00111784	0.00107967	0.00108974	0.00113999	0.00116986	0.00111716	0.00107478	glucose 1-dehydrogenase [EC:1.1.1.47]
K00035	2.76029e-05	4.55975e-05	3.74135e-05	2.67736e-05	2.71479e-05	2.61381e-05	3.56912e-05	3.02744e-05	3.97832e-05	3.5933e-05	2.68143e-05	4.11242e-05	2.51934e-05	3.12609e-05	2.37074e-05	2.51236e-05	2.20507e-05	D-galactose 1-dehydrogenase [EC:1.1.1.48]
K00036	0.00023183	0.000234016	0.000232863	0.000229749	0.000240198	0.000225439	0.00023158	0.000233538	0.000229967	0.000232645	0.000225901	0.000229815	0.000232423	0.000237729	0.000230713	0.000231569	0.000239609	glucose-6-phosphate 1-dehydrogenase [EC:1.1.1.49 1.1.1.363]
K00038	0.000923192	0.000907948	0.000884413	0.000868634	0.000966167	0.000834017	0.000892623	0.000917405	0.000841026	0.000873434	0.000863819	0.000865824	0.00088251	0.000928365	0.000899893	0.000892454	0.000845091	3alpha(or 20beta)-hydroxysteroid dehydrogenase [EC:1.1.1.53]
K00039	4.92414e-05	7.04004e-05	5.04491e-05	5.32416e-05	7.27003e-05	3.60741e-05	5.86479e-05	5.76827e-05	3.05824e-05	4.66026e-05	4.79995e-05	3.46816e-05	4.8318e-05	6.7979e-05	6.11069e-05	4.82287e-05	4.31877e-05	ribitol 2-dehydrogenase [EC:1.1.1.56]
K00040	0.000143155	0.000129514	0.00014371	0.000141209	0.000122226	0.00015897	0.000141355	0.000134757	0.000165987	0.000150441	0.000146177	0.000158391	0.000144909	0.000129143	0.000134951	0.000144902	0.000149102	fructuronate reductase [EC:1.1.1.57]
K00041	1.70786e-07	2.12479e-07	1.67279e-07	1.12949e-07	8.2159e-08	9.10025e-08	1.64744e-07	2.40012e-07	1.88789e-07	2.08501e-07	1.38716e-07	1.74018e-07	1.14327e-07	1.99271e-07	1.41855e-07	1.8788e-07	1.05111e-07	tagaturonate reductase [EC:1.1.1.58]
K00042	0.000390092	0.000361812	0.00043772	0.00048973	0.000354234	0.00050419	0.000453099	0.000431026	0.000512996	0.000461423	0.000465951	0.000451418	0.000446166	0.00042481	0.00047424	0.000463414	0.000485328	2-hydroxy-3-oxopropionate reductase [EC:1.1.1.60]
K00043	0.000123827	0.000119623	0.0001262	0.000131847	0.000116437	0.000137654	0.000126125	0.000127727	0.000135672	0.00013428	0.000132386	0.000132198	0.000126997	0.000126886	0.000127364	0.000125263	0.000136889	4-hydroxybutyrate dehydrogenase [EC:1.1.1.61]
K00045	0.00012337	0.000130022	0.000131153	0.000132208	0.000112304	0.000142498	0.000133151	0.000127775	0.000150015	0.000141029	0.000135089	0.000145354	0.000125195	0.000121649	0.000127246	0.000127037	0.000131981	mannitol 2-dehydrogenase [EC:1.1.1.67]
K00046	0.00123569	0.00127092	0.0012717	0.00128519	0.00129995	0.00128193	0.0012983	0.00129299	0.00127404	0.00127812	0.0012793	0.00127255	0.00126813	0.00131246	0.0013139	0.00127822	0.00124821	gluconate 5-dehydrogenase [EC:1.1.1.69]
K00048	1.15882e-05	1.24488e-05	9.74017e-06	1.04519e-05	1.0892e-05	9.82077e-06	1.09961e-05	1.47972e-05	9.4408e-06	1.32236e-05	1.09259e-05	1.04467e-05	8.03576e-06	1.21575e-05	1.26752e-05	1.10214e-05	1.53509e-05	lactaldehyde reductase [EC:1.1.1.77]
K00050	0.00012622	8.36108e-05	0.000104224	9.07963e-05	9.20502e-05	0.00010762	9.17802e-05	9.4357e-05	0.000120081	0.000104208	9.53346e-05	0.000116156	0.000111631	8.78414e-05	8.00568e-05	0.000106347	0.000105453	hydroxypyruvate reductase [EC:1.1.1.81]
K00052	0.000288343	0.000288718	0.00030537	0.000308227	0.000276225	0.000314426	0.00030276	0.000299858	0.000329599	0.000309601	0.000298604	0.0003124	0.000295993	0.000288818	0.000297867	0.000297343	0.00030426	3-isopropylmalate dehydrogenase [EC:1.1.1.85]
K00053	0.000213285	0.000220518	0.000229135	0.000241301	0.000212185	0.000245428	0.000234278	0.000227716	0.000246732	0.000237343	0.000236302	0.000234964	0.000227557	0.000225753	0.000238743	0.000232762	0.000237764	ketol-acid reductoisomerase [EC:1.1.1.86]
K00054	6.03665e-05	5.25056e-05	6.98212e-05	7.46523e-05	5.57583e-05	8.07162e-05	6.96667e-05	6.28853e-05	8.62058e-05	7.00966e-05	7.14787e-05	7.52411e-05	7.44535e-05	6.65026e-05	7.0532e-05	7.49503e-05	7.60029e-05	hydroxymethylglutaryl-CoA reductase [EC:1.1.1.88]
K00055	0.000210407	0.000224063	0.000199179	0.000189305	0.00023052	0.00016224	0.00020859	0.000207623	0.000160839	0.000185364	0.000190819	0.000172587	0.00019537	0.000209918	0.000205187	0.000197002	0.000177779	aryl-alcohol dehydrogenase [EC:1.1.1.90]
K00057	0.000174395	0.000181316	0.000184122	0.000180707	0.00018144	0.000179478	0.000181227	0.000178621	0.00018183	0.000182738	0.000180762	0.000181282	0.000177311	0.000179474	0.000179204	0.000178433	0.000184298	glycerol-3-phosphate dehydrogenase (NAD(P)+) [EC:1.1.1.94]
K00058	0.000936199	0.00088439	0.000894672	0.000827338	0.000934074	0.000841922	0.000871005	0.00085276	0.000888195	0.000863528	0.000825961	0.000889064	0.000913722	0.000906163	0.000819495	0.000871026	0.000850653	D-3-phosphoglycerate dehydrogenase / 2-oxoglutarate reductase [EC:1.1.1.95 1.1.1.399]
K00059	0.0080707	0.00803524	0.00802844	0.00811433	0.00806574	0.00803511	0.00815598	0.00819313	0.0081144	0.00810662	0.00808708	0.00806065	0.00798328	0.00807071	0.00819441	0.00812633	0.00793701	3-oxoacyl-[acyl-carrier protein] reductase [EC:1.1.1.100]
K00060	8.14556e-05	0.000118645	8.41594e-05	9.51617e-05	0.000110749	6.81115e-05	0.000102069	0.000113446	6.21455e-05	8.92468e-05	8.88828e-05	7.1368e-05	7.44687e-05	0.000101923	0.000111324	8.4507e-05	7.90072e-05	threonine 3-dehydrogenase [EC:1.1.1.103]
K00064	0.000192367	0.000258251	0.000227856	0.000246715	0.00025107	0.000213075	0.000250596	0.000244545	0.000204188	0.000224556	0.000229621	0.000201742	0.000217723	0.00026477	0.000265548	0.000223514	0.000225062	D-threo-aldose 1-dehydrogenase [EC:1.1.1.122]
K00065	0.000798127	0.00080382	0.000767613	0.000776214	0.000842684	0.00074489	0.000792921	0.00078715	0.000751204	0.000771794	0.00076087	0.000753541	0.00077903	0.000821958	0.000787243	0.000772854	0.000742328	2-dehydro-3-deoxy-D-gluconate 5-dehydrogenase [EC:1.1.1.127]
K00066	1.06107e-05	1.05104e-05	9.85888e-06	1.02253e-05	9.67877e-06	9.03774e-06	1.03082e-05	1.49304e-05	8.42427e-06	1.22888e-05	1.15819e-05	9.23618e-06	8.16888e-06	1.09168e-05	1.16926e-05	8.90916e-06	1.51025e-05	GDP-mannose 6-dehydrogenase [EC:1.1.1.132]
K00067	0.000303767	0.000279012	0.00028015	0.000279528	0.000288881	0.000296036	0.000274322	0.000283147	0.000278295	0.000288522	0.000297847	0.000291484	0.000287067	0.000270383	0.000280309	0.000290864	0.000293761	dTDP-4-dehydrorhamnose reductase [EC:1.1.1.133]
K00068	5.75651e-05	5.17725e-05	5.58749e-05	4.70974e-05	6.66123e-05	4.48574e-05	5.25737e-05	5.32888e-05	4.73001e-05	4.68938e-05	4.48078e-05	4.69815e-05	5.61933e-05	6.09392e-05	5.00668e-05	5.17268e-05	5.06822e-05	sorbitol-6-phosphate 2-dehydrogenase [EC:1.1.1.140]
K00073	3.42514e-07	3.11617e-07	1.10557e-06	2.54886e-07	3.35313e-07	3.95302e-07	3.16868e-07	1.08996e-06	4.9004e-07	7.26291e-07	3.61319e-07	4.46955e-07	3.24403e-07	2.25645e-07	4.85746e-07	5.01789e-07	2.53111e-07	ureidoglycolate dehydrogenase (NAD+) [EC:1.1.1.350]
K00074	0.000531337	0.000554653	0.000566857	0.000541624	0.000539133	0.000535032	0.000559283	0.000547139	0.000530506	0.000536526	0.000546305	0.000530539	0.000542113	0.00055258	0.000555078	0.000554159	0.000549883	3-hydroxybutyryl-CoA dehydrogenase [EC:1.1.1.157]
K00075	0.000212087	0.000217373	0.000227805	0.000241831	0.000210336	0.000241483	0.000230991	0.000226983	0.000242999	0.000234072	0.000234424	0.000230611	0.000225709	0.000223629	0.000237286	0.000230223	0.000236903	UDP-N-acetylmuramate dehydrogenase [EC:1.3.1.98]
K00076	0.00010701	0.000107152	0.000105518	9.08613e-05	0.000123389	9.16449e-05	9.76572e-05	9.8565e-05	8.79913e-05	9.196e-05	9.12551e-05	9.11882e-05	0.00010427	0.000110915	9.77495e-05	9.9835e-05	9.59017e-05	7-alpha-hydroxysteroid dehydrogenase [EC:1.1.1.159]
K00077	0.000389085	0.000315786	0.000345702	0.000333027	0.000324783	0.00035999	0.000341305	0.000347279	0.000385659	0.000360001	0.000346725	0.000378213	0.00035715	0.000320557	0.000320506	0.000354721	0.000350573	2-dehydropantoate 2-reductase [EC:1.1.1.169]
K00082	3.81372e-05	5.59517e-05	3.93835e-05	4.12979e-05	5.466e-05	2.70506e-05	4.66336e-05	5.08199e-05	2.15872e-05	3.68515e-05	3.9599e-05	2.92433e-05	3.51265e-05	5.17819e-05	5.12701e-05	3.89014e-05	3.26237e-05	5-amino-6-(5-phosphoribosylamino)uracil reductase [EC:1.1.1.193]
K00086	3.97108e-05	2.74611e-05	3.81296e-05	2.72478e-05	3.55092e-05	3.38719e-05	3.24517e-05	3.03872e-05	3.91455e-05	3.19842e-05	2.94824e-05	3.65953e-05	3.77039e-05	3.13068e-05	2.69111e-05	3.5499e-05	3.47707e-05	1,3-propanediol dehydrogenase [EC:1.1.1.202]
K00087	2.01554e-05	2.95476e-05	2.09875e-05	2.24377e-05	3.14125e-05	1.41103e-05	2.51981e-05	2.35077e-05	1.15117e-05	1.87079e-05	2.08196e-05	1.2512e-05	2.14768e-05	2.88079e-05	2.66463e-05	1.97471e-05	1.85581e-05	xanthine dehydrogenase molybdenum-binding subunit [EC:1.17.1.4]
K00088	0.000295448	0.000335522	0.000307516	0.000303137	0.000351598	0.000273251	0.000314094	0.000316818	0.000255444	0.000289914	0.000297034	0.00026697	0.000295227	0.000333198	0.000322663	0.000294387	0.000292774	IMP dehydrogenase [EC:1.1.1.205]
K00090	0.000233244	0.000223188	0.000230558	0.000223243	0.000244257	0.000221209	0.000227121	0.000223296	0.000232782	0.000227279	0.00021494	0.000226494	0.000234034	0.000242891	0.000223471	0.000228642	0.000224726	glyoxylate/hydroxypyruvate/2-ketogluconate reductase [EC:1.1.1.79 1.1.1.81 1.1.1.215]
K00091	0.000213592	0.000216378	0.000178337	0.000202601	0.000218424	0.00019028	0.000188989	0.000215979	0.000182451	0.000198726	0.000193935	0.000187917	0.000187376	0.000205719	0.000202596	0.000190226	0.000192888	dihydroflavonol-4-reductase [EC:1.1.1.219]
K00096	2.09832e-05	2.77131e-05	1.9378e-05	2.21801e-05	3.80019e-05	1.32624e-05	2.40171e-05	2.85677e-05	9.56697e-06	1.81526e-05	1.79432e-05	1.26456e-05	2.16258e-05	3.44241e-05	2.9259e-05	2.03771e-05	1.85264e-05	glycerol-1-phosphate dehydrogenase [NAD(P)+] [EC:1.1.1.261]
K00097	0.000178048	0.000168259	0.000190184	0.0002062	0.00016017	0.000213109	0.000192672	0.00018701	0.000226302	0.000204666	0.00019626	0.000205661	0.000190517	0.00018065	0.000193895	0.000194829	0.000202402	4-hydroxythreonine-4-phosphate dehydrogenase [EC:1.1.1.262]
K00098	4.56543e-05	6.7785e-05	4.66693e-05	5.42116e-05	6.04732e-05	3.82126e-05	6.29583e-05	7.29743e-05	3.28083e-05	5.13059e-05	5.46418e-05	3.84291e-05	3.9762e-05	5.57394e-05	6.81758e-05	4.68078e-05	4.30274e-05	L-idonate 5-dehydrogenase [EC:1.1.1.264]
K00099	0.0001722	0.000165648	0.000170971	0.000176497	0.000167014	0.000177801	0.000170029	0.000171957	0.000173711	0.000174047	0.000175022	0.000170102	0.000172032	0.000166618	0.000175101	0.000174604	0.000178444	1-deoxy-D-xylulose-5-phosphate reductoisomerase [EC:1.1.1.267]
K00100	6.04373e-06	4.29355e-06	4.69088e-06	4.45851e-06	1.46264e-06	5.03556e-06	4.14473e-06	5.76622e-06	5.24698e-06	6.94098e-06	5.31541e-06	5.13251e-06	2.90433e-06	4.0069e-06	3.62945e-06	4.54721e-06	9.88629e-06	butanol dehydrogenase [EC:1.1.1.-]
K00101	0.000307157	0.000315394	0.000348795	0.000347966	0.000318338	0.000354519	0.000348056	0.000330699	0.000353612	0.000333723	0.000338504	0.000326997	0.00034206	0.000338727	0.00035074	0.000341956	0.000351057	L-lactate dehydrogenase (cytochrome) [EC:1.1.2.3]
K00102	0.000336315	0.000334309	0.000351041	0.000375014	0.00030142	0.000381727	0.000359925	0.00035609	0.000385831	0.000373484	0.00037397	0.000365983	0.000338789	0.000327756	0.000366081	0.000358663	0.000361434	D-lactate dehydrogenase (cytochrome) [EC:1.1.2.4]
K00103	5.24275e-05	7.14132e-05	5.64446e-05	5.35882e-05	8.01855e-05	4.33436e-05	5.86235e-05	5.91511e-05	3.14e-05	4.74374e-05	5.44824e-05	3.97133e-05	5.60716e-05	7.08689e-05	6.3535e-05	5.2879e-05	5.12935e-05	L-gulonolactone oxidase [EC:1.1.3.8]
K00104	0.00065057	0.000656867	0.000699221	0.000754889	0.000659743	0.000749383	0.000721463	0.00070447	0.00074273	0.000726163	0.000733773	0.000705428	0.000697599	0.000709981	0.000751373	0.000720343	0.000728702	glycolate oxidase [EC:1.1.3.15]
K00108	0.000397084	0.000347451	0.000387563	0.000382431	0.000322382	0.000406464	0.000376062	0.000382959	0.000430892	0.000396197	0.000381793	0.000401591	0.000375283	0.000344779	0.000360746	0.000386861	0.00040512	choline dehydrogenase [EC:1.1.99.1]
K00109	9.64871e-07	1.59331e-06	8.85135e-07	1.63563e-06	1.79425e-06	1.15042e-06	1.46129e-06	1.5183e-06	7.91704e-07	1.22236e-06	1.22209e-06	8.18993e-07	7.47384e-07	1.1504e-06	1.70422e-06	1.33471e-06	1.28576e-06	2-hydroxyglutarate dehydrogenase [EC:1.1.99.2]
K00111	0.000375624	0.000410161	0.000396866	0.000418715	0.000430897	0.000393674	0.000410788	0.000412739	0.00037328	0.000395721	0.00040891	0.00037819	0.000399144	0.000438254	0.000436999	0.000405942	0.000398065	glycerol-3-phosphate dehydrogenase [EC:1.1.5.3]
K00112	4.02327e-05	3.0684e-05	2.76592e-05	3.03817e-05	3.88854e-05	3.00537e-05	2.85721e-05	3.18002e-05	2.97959e-05	3.27467e-05	3.29472e-05	3.58858e-05	3.4301e-05	3.27644e-05	2.99509e-05	3.37069e-05	2.96068e-05	glycerol-3-phosphate dehydrogenase subunit B [EC:1.1.5.3]
K00113	1.02883e-08	5.13402e-07	8.77331e-07	2.57972e-07	3.98457e-07	8.48519e-08	4.82426e-07	3.73603e-07	2.51957e-07	2.8262e-07	7.31241e-07	5.15997e-07	3.25832e-07	1.69966e-07	3.62399e-07	2.72465e-08	4.25528e-07	glycerol-3-phosphate dehydrogenase subunit C [EC:1.1.5.3]
K00114	7.35978e-05	5.27849e-05	6.1447e-05	5.3208e-05	6.65444e-05	6.0231e-05	5.7975e-05	5.83493e-05	6.59091e-05	6.20836e-05	5.9238e-05	6.95311e-05	6.78771e-05	5.76266e-05	5.1998e-05	6.26076e-05	5.95966e-05	alcohol dehydrogenase (cytochrome c) [EC:1.1.2.8]
K00116	1.14801e-05	1.13799e-05	1.02798e-05	1.18628e-05	6.20673e-06	1.06908e-05	8.97027e-06	1.22978e-05	1.05341e-05	1.31975e-05	1.15106e-05	1.02216e-05	8.62004e-06	8.81233e-06	9.64945e-06	9.37554e-06	1.64053e-05	malate dehydrogenase (quinone) [EC:1.1.5.4]
K00117	0.000176612	0.000156345	0.000167679	0.000171641	0.000151365	0.0001819	0.000162884	0.000165027	0.000187063	0.000176218	0.000170645	0.000178232	0.000171561	0.000161114	0.00016151	0.000170539	0.000184277	quinoprotein glucose dehydrogenase [EC:1.1.5.2]
K00118	1.36416e-05	2.24317e-05	1.79639e-05	1.36739e-05	1.45954e-05	1.39965e-05	1.81622e-05	1.51987e-05	2.10559e-05	1.86851e-05	1.29884e-05	2.06028e-05	1.32729e-05	1.55208e-05	1.20851e-05	1.22968e-05	1.18741e-05	glucose-fructose oxidoreductase [EC:1.1.99.28]
K00121	0.000623588	0.000642729	0.000590063	0.0005977	0.000693728	0.000563145	0.000607956	0.00061714	0.000542008	0.000591329	0.000597173	0.000578989	0.000611734	0.00065432	0.000629192	0.000614629	0.000586725	S-(hydroxymethyl)glutathione dehydrogenase / alcohol dehydrogenase [EC:1.1.1.284 1.1.1.1]
K00122	2.05656e-05	2.63215e-05	2.06685e-05	1.97676e-05	1.87245e-05	1.62882e-05	2.10122e-05	2.58711e-05	1.48238e-05	2.21782e-05	2.25387e-05	1.98951e-05	1.48834e-05	2.0976e-05	2.24429e-05	2.07564e-05	2.15498e-05	formate dehydrogenase [EC:1.17.1.9]
K00123	0.000413545	0.000440448	0.000443484	0.000489872	0.000445233	0.000453522	0.000466002	0.000479012	0.000432621	0.00045405	0.000463715	0.000414171	0.000428754	0.000472463	0.000506682	0.000456207	0.000470053	formate dehydrogenase major subunit [EC:1.17.1.9]
K00124	0.000234066	0.000245558	0.000266557	0.000293544	0.000244238	0.00028782	0.000276457	0.000274134	0.000279967	0.000272573	0.000277951	0.000256058	0.000260105	0.00027268	0.000298094	0.000274864	0.00028607	formate dehydrogenase iron-sulfur subunit
K00126	1.13105e-05	9.14052e-06	1.1942e-05	8.94692e-06	9.14333e-06	9.01083e-06	9.23433e-06	1.02479e-05	8.99289e-06	1.17949e-05	1.03863e-05	8.66525e-06	7.30635e-06	9.35074e-06	8.18572e-06	9.0896e-06	1.52874e-05	formate dehydrogenase subunit delta [EC:1.17.1.9]
K00127	0.000113513	0.000118797	0.000134526	0.000159446	0.000121354	0.000150456	0.000143848	0.000145948	0.000145207	0.000143335	0.000144662	0.000126988	0.000130089	0.00014455	0.000161026	0.000140099	0.000154858	formate dehydrogenase subunit gamma
K00128	0.00172487	0.00175279	0.00174929	0.00174376	0.00180981	0.00167885	0.00176496	0.00177007	0.00171199	0.00173254	0.00169712	0.00169284	0.00172955	0.00182438	0.00177203	0.00173795	0.00173401	aldehyde dehydrogenase (NAD+) [EC:1.2.1.3]
K00129	2.1464e-06	3.07888e-06	1.93313e-06	2.62867e-06	4.13589e-06	2.43815e-06	2.51798e-06	2.78306e-06	2.82369e-06	2.68489e-06	2.71821e-06	3.16038e-06	2.46575e-06	3.46444e-06	2.59174e-06	2.52166e-06	2.49833e-06	aldehyde dehydrogenase (NAD(P)+) [EC:1.2.1.5]
K00130	0.000953305	0.000990373	0.00101555	0.00101604	0.00100076	0.000991072	0.00103538	0.00101684	0.00102852	0.00101156	0.000985741	0.000998324	0.000997293	0.0010444	0.00103303	0.00101049	0.00101886	betaine-aldehyde dehydrogenase [EC:1.2.1.8]
K00131	7.08172e-05	9.99706e-05	7.84795e-05	7.60088e-05	8.98473e-05	5.34978e-05	8.22029e-05	8.4105e-05	4.896e-05	7.09783e-05	7.62583e-05	5.85215e-05	6.18093e-05	8.23073e-05	8.50883e-05	7.11413e-05	6.39033e-05	glyceraldehyde-3-phosphate dehydrogenase (NADP+) [EC:1.2.1.9]
K00132	5.16762e-06	7.05813e-06	4.74698e-06	6.33851e-06	8.86348e-06	4.21179e-06	6.73412e-06	9.42781e-06	3.29727e-06	5.74192e-06	5.52489e-06	3.9908e-06	4.57237e-06	7.98922e-06	8.5706e-06	5.14708e-06	5.41146e-06	acetaldehyde dehydrogenase (acetylating) [EC:1.2.1.10]
K00133	0.000218317	0.000229115	0.000219836	0.000225231	0.000223376	0.000215461	0.000225995	0.000228556	0.000214428	0.000224075	0.000221944	0.000211937	0.000215098	0.000223395	0.000227582	0.00021644	0.000224487	aspartate-semialdehyde dehydrogenase [EC:1.2.1.11]
K00134	0.000279583	0.000291669	0.00029171	0.00030745	0.000300338	0.000291835	0.000299716	0.000309089	0.000285705	0.000300003	0.00029636	0.000278246	0.000285604	0.000311617	0.000314087	0.000290711	0.000313102	glyceraldehyde 3-phosphate dehydrogenase [EC:1.2.1.12]
K00135	0.00165416	0.00166488	0.00168514	0.00167489	0.0017176	0.00162959	0.00169735	0.00169139	0.00166071	0.00166284	0.00162921	0.00162187	0.00166255	0.00173814	0.00169775	0.0016698	0.00166957	succinate-semialdehyde dehydrogenase / glutarate-semialdehyde dehydrogenase [EC:1.2.1.16 1.2.1.79 1.2.1.20]
K00137	0.000405165	0.00038187	0.00037443	0.000358693	0.000416721	0.000347641	0.000372348	0.000381888	0.000347976	0.000368031	0.000364595	0.000365909	0.000387441	0.000403881	0.000372521	0.000380562	0.000367155	aminobutyraldehyde dehydrogenase [EC:1.2.1.19]
K00138	0.000550305	0.000552276	0.00056589	0.000547734	0.000520656	0.000561496	0.000563419	0.000559317	0.000577021	0.000565045	0.000558013	0.000565504	0.000547763	0.000542422	0.000548917	0.000552803	0.000561649	aldehyde dehydrogenase [EC:1.2.1.-]
K00140	0.00064691	0.000641442	0.000654418	0.000663117	0.000647718	0.000664435	0.000658547	0.000661658	0.000676925	0.00066513	0.000645644	0.000657378	0.000657839	0.000674472	0.000665966	0.000667398	0.000677236	malonate-semialdehyde dehydrogenase (acetylating) / methylmalonate-semialdehyde dehydrogenase [EC:1.2.1.18 1.2.1.27]
K00141	0.000299193	0.000325017	0.000334557	0.000352932	0.000321892	0.000334881	0.000355316	0.000350977	0.000344902	0.000336465	0.000331709	0.000323906	0.000326513	0.000345605	0.00036604	0.000341113	0.000339024	benzaldehyde dehydrogenase (NAD) [EC:1.2.1.28]
K00145	0.000199869	0.000206609	0.000202559	0.000204812	0.000206654	0.000199659	0.000203556	0.000202064	0.000200117	0.00020259	0.000200222	0.000197574	0.000200777	0.00020545	0.000204358	0.000200162	0.000202105	N-acetyl-gamma-glutamyl-phosphate reductase [EC:1.2.1.38]
K00146	0.000755912	0.000702547	0.00072357	0.000703925	0.000770846	0.000696498	0.00071924	0.000722102	0.000711076	0.000712891	0.000698934	0.000710714	0.000742634	0.00076052	0.000716538	0.000736709	0.000725509	phenylacetaldehyde dehydrogenase [EC:1.2.1.39]
K00147	0.000216923	0.000226185	0.000231481	0.000247304	0.000215822	0.000240919	0.000239913	0.000234027	0.00024751	0.00024101	0.000238315	0.000234501	0.000225972	0.000230949	0.000244696	0.000235055	0.000235626	glutamate-5-semialdehyde dehydrogenase [EC:1.2.1.41]
K00148	0.000104888	0.000119602	0.000101565	9.5225e-05	0.000115515	8.63234e-05	0.000105256	0.000113547	8.84491e-05	0.00010575	0.000100279	0.000101777	8.7413e-05	0.000105334	0.000104921	9.79171e-05	9.36168e-05	glutathione-independent formaldehyde dehydrogenase [EC:1.2.1.46]
K00150	3.28381e-05	3.64857e-05	4.88733e-05	5.68584e-05	3.67711e-05	5.57787e-05	5.00322e-05	4.64715e-05	5.37538e-05	4.87596e-05	5.23591e-05	4.54775e-05	4.55873e-05	4.73621e-05	5.66014e-05	4.96141e-05	5.2949e-05	glyceraldehyde-3-phosphate dehydrogenase (NAD(P)) [EC:1.2.1.59]
K00151	0.000255283	0.000284545	0.00024938	0.000269352	0.000301569	0.000231214	0.000273716	0.000296356	0.000222464	0.000257517	0.000259449	0.00023374	0.000248216	0.000291749	0.000296754	0.000260299	0.000247323	5-carboxymethyl-2-hydroxymuconic-semialdehyde dehydrogenase [EC:1.2.1.60]
K00152	3.66235e-07	4.26132e-07	1.45672e-06	4.51856e-07	2.61283e-07	6.48399e-07	5.23929e-07	1.49573e-06	7.03704e-07	1.01722e-06	5.00399e-07	6.2427e-07	4.04051e-07	2.66888e-07	7.39838e-07	6.94331e-07	3.40633e-07	salicylaldehyde dehydrogenase [EC:1.2.1.65]
K00153	0.000152821	0.000156331	0.000155028	0.000161007	0.000165568	0.000156614	0.000164846	0.000165203	0.000146789	0.000154789	0.000161561	0.000149607	0.000157319	0.000161507	0.000171128	0.000161543	0.000157467	S-(hydroxymethyl)mycothiol dehydrogenase [EC:1.1.1.306]
K00154	0.000202502	0.000211498	0.00019263	0.000186374	0.000226654	0.000163855	0.000195903	0.000203701	0.00016857	0.000185763	0.000175425	0.000168795	0.000190671	0.00021567	0.000194266	0.000186963	0.000187052	coniferyl-aldehyde dehydrogenase [EC:1.2.1.68]
K00156	0.000100685	0.000114513	8.5407e-05	9.5644e-05	0.000138546	7.12969e-05	0.000101831	0.000118551	6.01075e-05	9.00147e-05	9.06485e-05	7.60084e-05	9.26402e-05	0.000124341	0.000116559	9.39883e-05	8.23188e-05	pyruvate dehydrogenase (quinone) [EC:1.2.5.1]
K00158	2.05344e-05	2.71287e-05	1.88879e-05	2.12976e-05	3.74634e-05	1.29282e-05	2.29586e-05	2.7433e-05	9.43695e-06	1.76236e-05	1.74107e-05	1.24376e-05	2.14768e-05	3.40672e-05	2.83785e-05	2.02118e-05	1.79368e-05	pyruvate oxidase [EC:1.2.3.3]
K00161	0.000167575	0.000226259	0.000203005	0.000230819	0.000215172	0.000195756	0.00022784	0.000226756	0.000192689	0.00020912	0.000211731	0.000185621	0.000189065	0.000228743	0.000244904	0.00020142	0.000201606	pyruvate dehydrogenase E1 component alpha subunit [EC:1.2.4.1]
K00162	0.000204669	0.000284899	0.000245293	0.000269082	0.000263392	0.000231159	0.000272738	0.000262917	0.0002365	0.000253048	0.000247548	0.000228452	0.000227178	0.000275527	0.000282478	0.000238808	0.000235333	pyruvate dehydrogenase E1 component beta subunit [EC:1.2.4.1]
K00163	0.000222089	0.000229191	0.000238765	0.000252725	0.000232747	0.00024395	0.000242751	0.000243098	0.000240083	0.000239317	0.000241213	0.000230954	0.000236765	0.000244073	0.000253422	0.000239139	0.000244927	pyruvate dehydrogenase E1 component [EC:1.2.4.1]
K00164	0.000255656	0.00023369	0.000236864	0.000243718	0.000235658	0.000250837	0.000235974	0.000242185	0.0002548	0.000247563	0.000242602	0.000249759	0.000241278	0.000231165	0.000235583	0.000241118	0.000238834	2-oxoglutarate dehydrogenase E1 component [EC:1.2.4.2]
K00166	1.60499e-05	2.54304e-05	1.71398e-05	1.70118e-05	2.07253e-05	1.65221e-05	1.83078e-05	1.75708e-05	1.90402e-05	2.0184e-05	1.86676e-05	2.11289e-05	1.52421e-05	1.91434e-05	1.80788e-05	1.85528e-05	1.53413e-05	2-oxoisovalerate dehydrogenase E1 component alpha subunit [EC:1.2.4.4]
K00167	9.39344e-05	0.000120939	0.00012395	0.000151858	0.000107523	0.000140443	0.000140453	0.000131944	0.000138675	0.000134635	0.000141089	0.000121632	0.000119077	0.000126903	0.00015361	0.000129646	0.00013603	2-oxoisovalerate dehydrogenase E1 component beta subunit [EC:1.2.4.4]
K00169	3.9417e-07	1.23293e-06	1.35266e-06	9.88233e-07	1.09249e-06	6.80835e-07	1.14195e-06	1.04779e-06	7.14803e-07	9.11241e-07	1.31279e-06	9.07839e-07	7.57988e-07	7.69731e-07	1.05554e-06	4.57741e-07	1.05626e-06	pyruvate ferredoxin oxidoreductase alpha subunit [EC:1.2.7.1]
K00170	3.65234e-07	1.18082e-06	1.35752e-06	8.90336e-07	1.0239e-06	6.14166e-07	1.08088e-06	9.67122e-07	7.33672e-07	8.72796e-07	1.25171e-06	8.75135e-07	7.96573e-07	7.38473e-07	9.52936e-07	4.0461e-07	1.03829e-06	pyruvate ferredoxin oxidoreductase beta subunit [EC:1.2.7.1]
K00171	3.62662e-07	1.14634e-06	1.28375e-06	8.57924e-07	1.00104e-06	5.63659e-07	1.04526e-06	9.35706e-07	6.64301e-07	8.15649e-07	1.23537e-06	8.47882e-07	7.06541e-07	7.18937e-07	9.24555e-07	3.95074e-07	9.96682e-07	pyruvate ferredoxin oxidoreductase delta subunit [EC:1.2.7.1]
K00172	3.62662e-07	1.14634e-06	1.28375e-06	8.57924e-07	1.00104e-06	5.63659e-07	1.04526e-06	9.35706e-07	6.64301e-07	8.15649e-07	1.23537e-06	8.47882e-07	7.06541e-07	7.18937e-07	9.24555e-07	3.95074e-07	9.96682e-07	pyruvate ferredoxin oxidoreductase gamma subunit [EC:1.2.7.1]
K00174	3.77028e-05	5.35922e-05	4.13253e-05	4.1565e-05	5.53417e-05	2.83055e-05	4.60485e-05	4.69204e-05	2.35818e-05	3.62086e-05	3.91868e-05	2.788e-05	3.49896e-05	4.88533e-05	4.82644e-05	3.73648e-05	3.48985e-05	2-oxoglutarate/2-oxoacid ferredoxin oxidoreductase subunit alpha [EC:1.2.7.3 1.2.7.11]
K00175	3.77028e-05	5.35922e-05	4.13253e-05	4.1565e-05	5.53417e-05	2.83055e-05	4.60485e-05	4.69204e-05	2.35818e-05	3.62086e-05	3.91868e-05	2.788e-05	3.49896e-05	4.88533e-05	4.82644e-05	3.73648e-05	3.48985e-05	2-oxoglutarate/2-oxoacid ferredoxin oxidoreductase subunit beta [EC:1.2.7.3 1.2.7.11]
K00176	5.47209e-07	8.44772e-07	4.78571e-07	9.52367e-07	1.01991e-06	5.49966e-07	7.88099e-07	9.88633e-07	3.45686e-07	8.4301e-07	6.15294e-07	4.13443e-07	3.08397e-07	6.41768e-07	1.04002e-06	8.83542e-07	6.40919e-07	2-oxoglutarate ferredoxin oxidoreductase subunit delta [EC:1.2.7.3]
K00177	2.70068e-08	1.10343e-07	7.50988e-08	4.1011e-08	5.22566e-08	3.43448e-08	9.97422e-08	4.75495e-08	1.12104e-07	1.20529e-07	4.12936e-08	1.01746e-07	1.20043e-08	8.20526e-08	6.33108e-08	1.08986e-08	3.78248e-08	2-oxoglutarate ferredoxin oxidoreductase subunit gamma [EC:1.2.7.3]
K00179	3.25352e-05	3.65798e-05	4.75071e-05	5.80911e-05	3.51966e-05	5.84295e-05	5.24176e-05	4.7132e-05	5.76745e-05	5.21723e-05	5.25577e-05	4.80029e-05	4.51735e-05	4.67179e-05	5.64542e-05	4.98496e-05	5.37493e-05	indolepyruvate ferredoxin oxidoreductase, alpha subunit [EC:1.2.7.8]
K00180	3.25339e-05	3.65787e-05	4.74932e-05	5.80814e-05	3.51941e-05	5.8427e-05	5.24121e-05	4.71122e-05	5.76706e-05	5.21428e-05	5.25558e-05	4.80001e-05	4.5172e-05	4.67042e-05	5.64478e-05	4.98488e-05	5.37458e-05	indolepyruvate ferredoxin oxidoreductase, beta subunit [EC:1.2.7.8]
K00183	3.07168e-05	1.76559e-05	2.81613e-05	2.00586e-05	2.05635e-05	2.6132e-05	2.23697e-05	1.95202e-05	3.24238e-05	2.30917e-05	2.08005e-05	2.91368e-05	3.00614e-05	1.98183e-05	1.64684e-05	2.69404e-05	2.63598e-05	prokaryotic molybdopterin-containing oxidoreductase family, molybdopterin binding subunit
K00184	4.15213e-05	5.23784e-05	5.86068e-05	7.03685e-05	4.59728e-05	6.97239e-05	5.84922e-05	5.84813e-05	6.30694e-05	5.91622e-05	6.62984e-05	5.80916e-05	5.82135e-05	5.45512e-05	6.86692e-05	6.07688e-05	6.84247e-05	prokaryotic molybdopterin-containing oxidoreductase family, iron-sulfur binding subunit
K00185	2.27403e-06	4.3196e-06	3.92193e-06	3.3553e-06	5.12931e-06	2.80685e-06	3.68028e-06	3.78981e-06	3.5077e-06	3.46625e-06	4.32881e-06	4.36023e-06	3.31334e-06	3.97027e-06	3.50829e-06	2.73986e-06	3.50683e-06	prokaryotic molybdopterin-containing oxidoreductase family, membrane subunit
K00196	1.59897e-07	8.22465e-08	9.65977e-07	1.14654e-07	5.87887e-08	2.6129e-07	1.2349e-07	9.49857e-07	3.16334e-07	5.79786e-07	1.8238e-07	2.87876e-07	1.27475e-07	5.73066e-08	3.22375e-07	3.869e-07	8.95186e-08	anaerobic carbon-monoxide dehydrogenase iron sulfur subunit
K00200	4.82936e-07	1.18363e-06	1.32839e-06	1.13327e-06	1.05609e-06	5.99672e-07	1.04688e-06	1.09406e-06	7.54711e-07	8.78227e-07	1.31764e-06	9.02177e-07	8.18646e-07	6.0903e-07	1.03834e-06	4.13878e-07	1.1984e-06	formylmethanofuran dehydrogenase subunit A [EC:1.2.7.12]
K00201	1.7683e-08	5.23874e-07	9.15543e-07	2.7054e-07	4.37921e-07	1.00846e-07	4.93113e-07	3.84217e-07	2.71936e-07	2.99764e-07	7.48447e-07	5.35881e-07	3.46268e-07	1.89177e-07	3.71496e-07	3.56475e-08	4.41131e-07	formylmethanofuran dehydrogenase subunit B [EC:1.2.7.12]
K00202	1.7683e-08	5.23874e-07	9.15543e-07	2.7054e-07	4.37921e-07	1.00846e-07	4.93113e-07	3.84217e-07	2.71936e-07	2.99764e-07	7.48447e-07	5.35881e-07	3.46268e-07	1.89177e-07	3.71496e-07	3.56475e-08	4.41131e-07	formylmethanofuran dehydrogenase subunit C [EC:1.2.7.12]
K00208	0.000421661	0.000428649	0.000401744	0.000392875	0.000448591	0.000361169	0.000405634	0.000405065	0.000355622	0.000391154	0.000397179	0.000377397	0.000391801	0.000425606	0.000408122	0.00040307	0.000371833	enoyl-[acyl-carrier protein] reductase I [EC:1.3.1.9 1.3.1.10]
K00209	2.85102e-05	4.18982e-05	3.18519e-05	3.0362e-05	3.85889e-05	2.23771e-05	3.18198e-05	3.026e-05	2.68712e-05	2.95776e-05	2.44877e-05	2.76927e-05	2.93023e-05	3.82724e-05	2.92737e-05	2.5894e-05	2.54679e-05	enoyl-[acyl-carrier protein] reductase / trans-2-enoyl-CoA reductase (NAD+) [EC:1.3.1.9 1.3.1.44]
K00210	1.30566e-05	1.48492e-05	1.17282e-05	1.23935e-05	1.15365e-05	1.40957e-05	1.25499e-05	1.34029e-05	1.54105e-05	1.73247e-05	1.43371e-05	1.55026e-05	1.14843e-05	1.25532e-05	1.27637e-05	1.31271e-05	1.81694e-05	prephenate dehydrogenase [EC:1.3.1.12]
K00213	2.06409e-06	2.95321e-06	1.82446e-06	2.52813e-06	4.02049e-06	2.3607e-06	2.41417e-06	2.62116e-06	2.75599e-06	2.58722e-06	2.64193e-06	3.06388e-06	2.40515e-06	3.36025e-06	2.50296e-06	2.40723e-06	2.42646e-06	7-dehydrocholesterol reductase [EC:1.3.1.21]
K00214	5.1765e-06	7.15046e-06	5.26656e-06	7.09848e-06	4.81711e-06	4.07716e-06	4.82644e-06	6.26889e-06	4.28902e-06	5.21817e-06	4.96853e-06	4.27861e-06	4.50665e-06	4.5854e-06	6.1268e-06	5.0562e-06	6.06447e-06	biliverdin reductase [EC:1.3.1.24]
K00215	0.000186026	0.000188464	0.00018783	0.000193229	0.000182678	0.000186302	0.000191896	0.000191345	0.000194646	0.000193247	0.000186715	0.000188083	0.000182131	0.000185844	0.000189537	0.000185018	0.000186868	4-hydroxy-tetrahydrodipicolinate reductase [EC:1.17.1.8]
K00216	0.000266457	0.000292246	0.000261372	0.000271747	0.000269314	0.000258904	0.000276744	0.000284802	0.000243468	0.000278005	0.000281338	0.000256016	0.00024936	0.000268101	0.000280987	0.000261239	0.000275132	2,3-dihydro-2,3-dihydroxybenzoate dehydrogenase [EC:1.3.1.28]
K00217	6.83966e-05	8.17464e-05	9.53107e-05	0.000119366	7.59826e-05	0.000114507	0.000106332	0.000101184	0.000110706	0.000103494	0.00010871	9.6438e-05	9.30797e-05	9.98143e-05	0.000120949	0.000104246	0.000107031	maleylacetate reductase [EC:1.3.1.32]
K00218	0.000246341	0.000281382	0.000237327	0.000229908	0.000241677	0.000205918	0.000252225	0.000253718	0.000209657	0.000236398	0.000243027	0.000225419	0.000209586	0.000230175	0.000241632	0.000228492	0.00020792	protochlorophyllide reductase [EC:1.3.1.33]
K00219	0.000561917	0.000494643	0.000490083	0.000470743	0.000557099	0.000472803	0.000481816	0.00049964	0.000475469	0.000483903	0.000473468	0.000478127	0.00052025	0.000513279	0.000471137	0.000494601	0.000494162	2,4-dienoyl-CoA reductase (NADPH2) [EC:1.3.1.34]
K00220	3.08992e-05	3.60368e-05	3.46578e-05	3.1104e-05	2.16874e-05	2.9429e-05	3.25994e-05	3.45068e-05	3.74807e-05	3.89264e-05	3.00917e-05	3.48555e-05	2.37514e-05	2.71693e-05	2.46826e-05	2.4825e-05	3.83981e-05	cyclohexadieny/prephenate dehydrogenase [EC:1.3.1.43 1.3.1.12]
K00222	2.06409e-06	2.95321e-06	1.82446e-06	2.52813e-06	4.02049e-06	2.3607e-06	2.41417e-06	2.62116e-06	2.75599e-06	2.58722e-06	2.64193e-06	3.06388e-06	2.40515e-06	3.36025e-06	2.50296e-06	2.40723e-06	2.42646e-06	Delta14-sterol reductase [EC:1.3.1.70]
K00226	3.408e-08	1.21071e-07	1.42688e-07	1.62721e-07	1.14311e-07	1.67684e-07	1.32311e-07	1.43498e-07	1.19874e-07	1.52739e-07	9.3771e-08	8.72107e-08	1.4148e-07	7.03308e-08	1.59368e-07	7.22031e-08	1.01181e-07	dihydroorotate dehydrogenase (fumarate) [EC:1.3.98.1]
K00227	4.12818e-06	5.90642e-06	3.64892e-06	5.05626e-06	8.04099e-06	4.7214e-06	4.82834e-06	5.24233e-06	5.51198e-06	5.17443e-06	5.28386e-06	6.12776e-06	4.81031e-06	6.7205e-06	5.00592e-06	4.81445e-06	4.85292e-06	Delta7-sterol 5-desaturase [EC:1.14.19.20]
K00228	0.000147675	0.000134933	0.000148502	0.000149667	0.000125816	0.000162814	0.000142574	0.000141348	0.000170124	0.00015517	0.000149152	0.000161877	0.000149529	0.000132735	0.000138813	0.000148688	0.000155374	coproporphyrinogen III oxidase [EC:1.3.3.3]
K00230	5.50639e-06	8.97431e-06	6.6093e-06	5.74868e-06	5.35534e-06	4.46118e-06	6.69284e-06	6.74768e-06	4.10682e-06	5.99413e-06	6.54953e-06	6.1872e-06	4.13913e-06	5.83807e-06	6.1843e-06	6.18041e-06	4.1993e-06	menaquinone-dependent protoporphyrinogen oxidase [EC:1.3.5.3]
K00231	0.00012788	0.00016766	0.000160302	0.00018358	0.000157798	0.000167426	0.000177998	0.000174919	0.000152176	0.000163398	0.000178303	0.000147645	0.000151832	0.000172322	0.000196393	0.000166358	0.000165901	protoporphyrinogen/coproporphyrinogen III oxidase [EC:1.3.3.4 1.3.3.15]
K00232	3.64464e-05	4.67369e-05	3.64725e-05	3.66041e-05	6.55424e-05	2.3583e-05	3.88726e-05	3.91411e-05	1.86798e-05	3.00032e-05	3.08321e-05	2.25527e-05	3.83808e-05	5.77864e-05	4.40316e-05	3.52005e-05	3.29257e-05	acyl-CoA oxidase [EC:1.3.3.6]
K00239	0.000325892	0.000334627	0.000317469	0.000315024	0.000342529	0.000297334	0.000326654	0.000329912	0.000294722	0.000313785	0.000314869	0.000302981	0.000313958	0.000327862	0.000326081	0.000315379	0.000306439	succinate dehydrogenase / fumarate reductase, flavoprotein subunit [EC:1.3.5.1 1.3.5.4]
K00240	0.000223418	0.000239371	0.000229939	0.00023083	0.000239003	0.000218076	0.000234096	0.000237397	0.000215564	0.000227171	0.0002269	0.000217646	0.000220354	0.000234723	0.000236624	0.000223019	0.000224722	succinate dehydrogenase / fumarate reductase, iron-sulfur subunit [EC:1.3.5.1 1.3.5.4]
K00241	0.000203036	0.00021073	0.000205185	0.000208548	0.000214972	0.000202377	0.000207335	0.00020927	0.000202769	0.000206257	0.000202917	0.000201981	0.00020427	0.000213048	0.000209627	0.000203485	0.000205694	succinate dehydrogenase / fumarate reductase, cytochrome b subunit
K00242	0.000176036	0.000176229	0.000177466	0.000180143	0.000167212	0.000182318	0.000177127	0.000177179	0.00018558	0.00018173	0.000177836	0.000181831	0.000176742	0.000171928	0.000176326	0.000177051	0.000179564	succinate dehydrogenase / fumarate reductase, membrane anchor subunit
K00243	6.10557e-06	4.12522e-06	5.06335e-06	5.03531e-06	1.32901e-06	5.67548e-06	4.25397e-06	6.11789e-06	5.70076e-06	7.34569e-06	6.44166e-06	5.37991e-06	3.94843e-06	3.85794e-06	4.01659e-06	4.4028e-06	1.05033e-05	uncharacterized protein
K00244	0.000220169	0.000214522	0.00024157	0.000239739	0.000234698	0.000239384	0.000243598	0.000228347	0.000246904	0.000229792	0.000230507	0.000228153	0.000241637	0.000243347	0.000244354	0.000244715	0.000240829	fumarate reductase flavoprotein subunit [EC:1.3.5.4]
K00245	1.02883e-08	5.13402e-07	8.77331e-07	2.57972e-07	3.98457e-07	8.48519e-08	4.82426e-07	3.73603e-07	2.51957e-07	2.8262e-07	7.31241e-07	5.15997e-07	3.25832e-07	1.69966e-07	3.62399e-07	2.72465e-08	4.25528e-07	fumarate reductase iron-sulfur subunit [EC:1.3.5.4]
K00247	1.02883e-08	5.13402e-07	8.77331e-07	2.57972e-07	3.98457e-07	8.48519e-08	4.82426e-07	3.73603e-07	2.51957e-07	2.8262e-07	7.31241e-07	5.15997e-07	3.25832e-07	1.69966e-07	3.62399e-07	2.72465e-08	4.25528e-07	fumarate reductase subunit D
K00248	0.00103091	0.00106208	0.00107494	0.00110342	0.0010951	0.00107858	0.00108577	0.0010835	0.00103138	0.00107151	0.00109579	0.0010172	0.00106049	0.0011063	0.00112619	0.00108271	0.00111941	butyryl-CoA dehydrogenase [EC:1.3.8.1]
K00249	0.00247062	0.00247315	0.00261425	0.00259168	0.00261111	0.00255678	0.00259355	0.00252436	0.00253262	0.00253276	0.00255534	0.00245218	0.00255346	0.00262778	0.00261881	0.00259561	0.00261388	acyl-CoA dehydrogenase [EC:1.3.8.7]
K00252	0.00110503	0.00122982	0.00126767	0.00133962	0.00125185	0.0012711	0.00129458	0.00125309	0.00121371	0.00124168	0.00129412	0.00116119	0.00121185	0.00130895	0.00136994	0.00126956	0.00128911	glutaryl-CoA dehydrogenase [EC:1.3.8.6]
K00253	0.000830335	0.000890192	0.000900338	0.000957614	0.000889756	0.000929596	0.000930746	0.000906276	0.000896223	0.000910181	0.000941435	0.000878594	0.000898013	0.000928414	0.000977288	0.000931437	0.000924387	isovaleryl-CoA dehydrogenase [EC:1.3.8.4]
K00254	0.000184104	0.00018472	0.000186806	0.000188432	0.000180594	0.000189684	0.000185754	0.000185224	0.000192599	0.000189534	0.000186511	0.000188436	0.000183813	0.000181004	0.00018475	0.000184908	0.000188564	dihydroorotate dehydrogenase [EC:1.3.5.2]
K00255	0.000205035	0.000219081	0.000234989	0.000239631	0.000219191	0.000231127	0.000234842	0.000227481	0.000222829	0.000226391	0.000235157	0.000208342	0.000216954	0.000229905	0.000242376	0.000227086	0.000241099	long-chain-acyl-CoA dehydrogenase [EC:1.3.8.8]
K00256	4.75405e-07	3.81986e-07	7.21538e-07	5.91573e-07	6.05306e-07	6.06085e-07	5.038e-07	7.54282e-07	4.20576e-07	7.29581e-07	4.11503e-07	4.61187e-07	4.16722e-07	5.70786e-07	6.09093e-07	3.81678e-07	5.58703e-07	isoquinoline 1-oxidoreductase [EC:1.3.99.16]
K00257	6.25963e-05	8.85195e-05	6.53626e-05	6.68608e-05	9.046e-05	4.52384e-05	7.37831e-05	7.39974e-05	3.75964e-05	5.8528e-05	6.3629e-05	4.54389e-05	5.98185e-05	8.27062e-05	7.83624e-05	6.24433e-05	5.56703e-05	acyl-ACP dehydrogenase [EC:1.3.99.-]
K00259	0.000193118	0.000210085	0.000196972	0.000201416	0.000195384	0.000192706	0.000200818	0.000203551	0.000192937	0.000201672	0.000200726	0.000196446	0.000190042	0.000198059	0.000203124	0.000197813	0.000203575	alanine dehydrogenase [EC:1.4.1.1]
K00260	8.82445e-05	6.00326e-05	6.82542e-05	6.46856e-05	7.37575e-05	7.49598e-05	6.46195e-05	6.62382e-05	8.15664e-05	7.12752e-05	6.8709e-05	8.16182e-05	7.82598e-05	6.50915e-05	5.93133e-05	7.45266e-05	6.8318e-05	glutamate dehydrogenase [EC:1.4.1.2]
K00261	0.000166229	0.000165114	0.000164799	0.000165744	0.00017893	0.000171545	0.000161488	0.000161879	0.000159038	0.000159083	0.000169948	0.000167805	0.000175431	0.000174694	0.000170715	0.000175684	0.000165671	glutamate dehydrogenase (NAD(P)+) [EC:1.4.1.3]
K00262	0.000101606	9.17795e-05	0.000108705	0.0001122	9.58305e-05	0.000117389	0.000106402	0.000102778	0.000123018	0.000109996	0.000106408	0.000108086	0.000110092	0.000105985	0.000107774	0.000110166	0.000115188	glutamate dehydrogenase (NADP+) [EC:1.4.1.4]
K00263	7.97103e-05	8.90222e-05	7.48152e-05	8.2569e-05	8.60553e-05	6.86043e-05	7.75862e-05	8.81091e-05	6.76809e-05	7.98444e-05	7.71326e-05	6.7924e-05	6.87296e-05	8.29369e-05	8.1691e-05	7.16439e-05	8.30132e-05	leucine dehydrogenase [EC:1.4.1.9]
K00265	0.000244358	0.000245791	0.000263296	0.000266456	0.000235257	0.000269243	0.000259346	0.000252947	0.00027636	0.000266713	0.00026257	0.000265404	0.000257661	0.000249659	0.000259017	0.000261321	0.000274228	glutamate synthase (NADPH/NADH) large chain [EC:1.4.1.13 1.4.1.14]
K00266	0.000336321	0.00036093	0.000352184	0.000354894	0.000370147	0.00033492	0.000358079	0.000353283	0.000340824	0.000347509	0.000342327	0.000335098	0.000349045	0.000378054	0.000360618	0.000345531	0.000353781	glutamate synthase (NADPH/NADH) small chain [EC:1.4.1.13 1.4.1.14]
K00270	8.36413e-06	9.67804e-06	1.05694e-05	8.35127e-06	1.07491e-05	6.85379e-06	1.00093e-05	9.14927e-06	5.98278e-06	7.97549e-06	9.24763e-06	5.49166e-06	6.84743e-06	8.11956e-06	9.10901e-06	7.31446e-06	8.58063e-06	phenylalanine dehydrogenase [EC:1.4.1.20]
K00271	3.69251e-05	4.40581e-05	3.62295e-05	3.96664e-05	5.14863e-05	2.7204e-05	3.79762e-05	4.29563e-05	2.43981e-05	3.52605e-05	3.33489e-05	2.64391e-05	3.30809e-05	4.67701e-05	4.23151e-05	3.4293e-05	4.08058e-05	valine dehydrogenase (NAD+) [EC:1.4.1.23]
K00273	1.54132e-05	2.30834e-05	1.54659e-05	1.89571e-05	1.96041e-05	1.39632e-05	2.20196e-05	2.35779e-05	1.23534e-05	1.82246e-05	1.86349e-05	1.28828e-05	1.33512e-05	1.76062e-05	2.33919e-05	1.57333e-05	1.55594e-05	D-amino-acid oxidase [EC:1.4.3.3]
K00274	0.000132206	0.00018446	0.000136709	0.000138942	0.000189844	0.000101774	0.000154642	0.000155257	9.04843e-05	0.000132367	0.000134054	0.000106234	0.000124586	0.000175679	0.000163432	0.000135017	0.000124555	monoamine oxidase [EC:1.4.3.4]
K00275	0.000246174	0.000244797	0.000238692	0.000242089	0.0002537	0.000237021	0.00024239	0.000245033	0.000236766	0.000244652	0.000239461	0.000239866	0.000239441	0.000245921	0.000241775	0.000238391	0.000238481	pyridoxamine 5-phosphate oxidase [EC:1.4.3.5]
K00276	9.76679e-06	1.26615e-05	8.80702e-06	1.16893e-05	1.63856e-05	7.3342e-06	1.28324e-05	1.82868e-05	5.56377e-06	1.03006e-05	1.00166e-05	7.34046e-06	8.20297e-06	1.46231e-05	1.62551e-05	9.45176e-06	9.60358e-06	primary-amine oxidase [EC:1.4.3.21]
K00278	0.000296928	0.000313069	0.000322424	0.000311495	0.000283687	0.000320521	0.000314442	0.000307992	0.000325807	0.000317598	0.000318916	0.000321271	0.000303188	0.000297434	0.000308102	0.000312046	0.000316067	L-aspartate oxidase [EC:1.4.3.16]
K00281	0.000191301	0.000191919	0.000192891	0.000194113	0.000183614	0.00019624	0.000191582	0.000192103	0.000199682	0.000198466	0.000193257	0.000196033	0.000188013	0.000186798	0.000190323	0.000191503	0.000199848	glycine dehydrogenase [EC:1.4.4.2]
K00282	0.00015574	0.000170432	0.000168484	0.000171306	0.000165783	0.000159721	0.000170583	0.000166052	0.000168186	0.000166135	0.0001586	0.00015707	0.000159606	0.000172516	0.0001699	0.000161575	0.000164959	glycine dehydrogenase subunit 1 [EC:1.4.4.2]
K00283	9.5296e-05	0.000106849	8.67578e-05	8.51135e-05	0.000110711	7.80303e-05	8.49102e-05	8.66202e-05	7.58894e-05	8.71716e-05	8.33042e-05	8.69533e-05	9.10042e-05	0.00010229	8.59147e-05	8.63384e-05	8.76689e-05	glycine dehydrogenase subunit 2 [EC:1.4.4.2]
K00284	0.000175193	0.000182595	0.00018499	0.00018158	0.000180614	0.000180303	0.000181387	0.000179135	0.000181706	0.000183332	0.000181271	0.00018102	0.000177796	0.000178957	0.000179972	0.000179024	0.000185479	glutamate synthase (ferredoxin) [EC:1.4.7.1]
K00285	0.000570515	0.000532962	0.000617281	0.000645178	0.000516639	0.000680997	0.000611208	0.000596287	0.000677765	0.000626144	0.000638735	0.000625252	0.000612021	0.000566972	0.000622746	0.000625528	0.000660191	D-amino-acid dehydrogenase [EC:1.4.5.1]
K00286	0.000219376	0.000205159	0.000218415	0.000210303	0.000200417	0.000219529	0.000210841	0.000208907	0.000229296	0.000218176	0.000211094	0.000222427	0.000215338	0.000204215	0.00020254	0.000214702	0.000222526	pyrroline-5-carboxylate reductase [EC:1.5.1.2]
K00287	0.000160497	0.000151368	0.000163737	0.000162265	0.000143414	0.000173315	0.00015616	0.000154597	0.000180115	0.00016775	0.000163311	0.000174091	0.000159741	0.000147039	0.000152251	0.000161957	0.000167454	dihydrofolate reductase [EC:1.5.1.3]
K00290	0.000114051	0.000100782	0.000100669	9.22848e-05	9.7076e-05	9.6721e-05	9.96505e-05	0.00010202	0.000107838	0.000102006	9.54006e-05	0.000108421	9.91472e-05	9.15099e-05	8.84639e-05	9.76894e-05	8.86643e-05	saccharopine dehydrogenase (NAD+, L-lysine forming) [EC:1.5.1.7]
K00293	1.18799e-05	1.765e-05	1.19661e-05	1.4631e-05	1.48754e-05	9.88362e-06	1.75093e-05	1.9808e-05	7.95511e-06	1.32207e-05	1.44298e-05	8.57847e-06	1.03382e-05	1.36085e-05	1.8484e-05	1.16064e-05	1.13533e-05	saccharopine dehydrogenase (NADP+, L-glutamate forming) [EC:1.5.1.10]
K00294	0.000253237	0.000225472	0.000236678	0.000229263	0.000241813	0.000232616	0.000239244	0.000232522	0.000240098	0.000233761	0.000236038	0.000243601	0.000247062	0.000234208	0.000232325	0.000248174	0.000230554	1-pyrroline-5-carboxylate dehydrogenase [EC:1.2.1.88]
K00297	0.00019782	0.000205431	0.000201807	0.000202927	0.000197147	0.000201521	0.000202775	0.000204821	0.000204301	0.000205635	0.000201524	0.000203699	0.000195116	0.000198388	0.000202507	0.000199739	0.000200649	methylenetetrahydrofolate reductase (NADPH) [EC:1.5.1.20]
K00299	0.000264727	0.000258365	0.000237976	0.000230972	0.000275569	0.000219016	0.000245777	0.000260402	0.000211173	0.00022915	0.000234003	0.000220548	0.000241712	0.000253483	0.000249086	0.000239603	0.000219162	FMN reductase [EC:1.5.1.38]
K00301	2.77933e-05	4.01517e-05	2.76558e-05	3.1219e-05	4.09656e-05	1.97932e-05	3.55214e-05	3.6319e-05	1.57409e-05	2.67316e-05	2.89315e-05	1.77558e-05	2.74186e-05	3.82466e-05	3.85484e-05	2.70808e-05	2.50236e-05	sarcosine oxidase [EC:1.5.3.1]
K00302	6.43222e-05	8.52316e-05	8.24309e-05	9.03112e-05	6.27679e-05	8.42084e-05	8.76588e-05	8.39035e-05	8.89458e-05	8.74092e-05	8.68055e-05	8.45978e-05	7.14678e-05	7.99501e-05	8.78856e-05	8.03371e-05	8.39767e-05	sarcosine oxidase, subunit alpha [EC:1.5.3.1]
K00303	4.3496e-05	5.80406e-05	4.3724e-05	4.42734e-05	5.92171e-05	3.34446e-05	4.80902e-05	5.50905e-05	3.08295e-05	4.44003e-05	4.34372e-05	3.93184e-05	3.9959e-05	5.95546e-05	5.15915e-05	4.37757e-05	4.30169e-05	sarcosine oxidase, subunit beta [EC:1.5.3.1]
K00304	1.16427e-05	1.33926e-05	1.15537e-05	1.00562e-05	6.78025e-06	9.27003e-06	1.07995e-05	1.25367e-05	9.55811e-06	1.2955e-05	1.20203e-05	1.14876e-05	7.32542e-06	1.00078e-05	9.70219e-06	1.10524e-05	1.39394e-05	sarcosine oxidase, subunit delta [EC:1.5.3.1]
K00305	1.15638e-05	1.32617e-05	1.13346e-05	9.89852e-06	6.62464e-06	9.11152e-06	1.0681e-05	1.24129e-05	9.33013e-06	1.27822e-05	1.18067e-05	1.13061e-05	7.07551e-06	9.79389e-06	9.59267e-06	1.09491e-05	1.37578e-05	sarcosine oxidase, subunit gamma [EC:1.5.3.1]
K00311	0.000217416	0.000220847	0.000247476	0.000269337	0.000199041	0.00027804	0.000250062	0.000240326	0.000282151	0.000259728	0.000261814	0.000260916	0.000243666	0.000231378	0.000259334	0.000255092	0.000262369	electron-transferring-flavoprotein dehydrogenase [EC:1.5.5.1]
K00313	3.65516e-05	2.64625e-05	2.56822e-05	2.62112e-05	3.42939e-05	2.69871e-05	2.56356e-05	2.7742e-05	2.64143e-05	2.92182e-05	3.05196e-05	3.26982e-05	3.11563e-05	2.85307e-05	2.61892e-05	2.9656e-05	2.62133e-05	electron transfer flavoprotein-quinone oxidoreductase [EC:1.5.5.-]
K00314	5.90034e-07	7.3184e-07	6.485e-07	5.33937e-07	3.75377e-07	6.27837e-07	7.41654e-07	7.50602e-07	9.0538e-07	8.70718e-07	6.15361e-07	7.22718e-07	5.2719e-07	6.3314e-07	3.99222e-07	5.73493e-07	4.46899e-07	sarcosine dehydrogenase [EC:1.5.8.3]
K00315	1.79912e-05	2.41783e-05	2.2154e-05	1.84198e-05	2.26942e-05	1.47445e-05	2.15496e-05	2.43799e-05	1.41785e-05	1.92405e-05	1.93469e-05	1.74675e-05	1.49603e-05	2.25883e-05	2.09541e-05	1.7562e-05	1.68683e-05	dimethylglycine dehydrogenase [EC:1.5.8.4]
K00316	2.39878e-06	3.79726e-06	2.54276e-06	3.0583e-06	4.35445e-06	2.77334e-06	3.12254e-06	3.44903e-06	3.18665e-06	3.16129e-06	3.08885e-06	3.86483e-06	2.73742e-06	4.1544e-06	3.04819e-06	2.67015e-06	2.8969e-06	spermidine dehydrogenase [EC:1.5.99.6]
K00317	1.84372e-05	2.2704e-05	2.4205e-05	1.84687e-05	2.55537e-05	1.56899e-05	2.04312e-05	1.92306e-05	1.41448e-05	1.86679e-05	2.03378e-05	1.57511e-05	1.50952e-05	1.96161e-05	1.93506e-05	1.8139e-05	1.89063e-05	dimethylamine/trimethylamine dehydrogenase [EC:1.5.8.1 1.5.8.2]
K00318	6.58556e-05	8.12951e-05	6.53732e-05	6.78074e-05	7.5696e-05	5.35302e-05	7.31406e-05	7.57737e-05	4.8461e-05	6.24527e-05	6.61872e-05	5.12392e-05	5.66512e-05	7.02168e-05	7.53469e-05	6.17532e-05	5.59042e-05	proline dehydrogenase [EC:1.5.-.-]
K00320	1.73467e-06	2.66264e-06	1.36547e-06	2.82572e-06	2.98255e-06	1.79472e-06	2.46109e-06	2.49533e-06	1.31051e-06	2.01896e-06	2.16009e-06	1.36527e-06	1.11152e-06	1.90352e-06	3.03848e-06	2.37848e-06	2.20064e-06	5,10-methylenetetrahydromethanopterin reductase [EC:1.5.98.2]
K00322	3.29771e-05	4.732e-05	3.77423e-05	3.47718e-05	3.13085e-05	3.05529e-05	4.01983e-05	4.0042e-05	3.67258e-05	4.02908e-05	3.70452e-05	3.84477e-05	2.85371e-05	3.46255e-05	3.35034e-05	3.06124e-05	3.43606e-05	NAD(P) transhydrogenase [EC:1.6.1.1]
K00324	0.000398241	0.000399715	0.00042303	0.000460959	0.000362435	0.000457873	0.000438057	0.000429551	0.000477532	0.000453089	0.00044446	0.000441648	0.000412682	0.000402016	0.000444096	0.000431816	0.000447066	NAD(P) transhydrogenase subunit alpha [EC:1.6.1.2]
K00325	0.00019351	0.000192414	0.000207755	0.000224078	0.000179332	0.000224481	0.000212062	0.000205874	0.000234585	0.000219032	0.000215863	0.000216695	0.000202619	0.00019599	0.000214641	0.000211162	0.000216609	NAD(P) transhydrogenase subunit beta [EC:1.6.1.2]
K00329	0.000159737	0.000176167	0.000176386	0.000163893	0.000149182	0.000170566	0.000169538	0.000159051	0.000182206	0.000173194	0.000169379	0.000183665	0.000161706	0.000156387	0.000156636	0.000164789	0.000160436	NADH dehydrogenase [EC:1.6.5.3]
K00330	0.000201286	0.000207885	0.000203349	0.000206476	0.000211449	0.000200378	0.000205162	0.000206727	0.00020046	0.000203964	0.000200707	0.000198847	0.000202129	0.000209654	0.00020764	0.000201451	0.000203607	NADH-quinone oxidoreductase subunit A [EC:1.6.5.3]
K00331	0.000213742	0.000228029	0.000217785	0.000220934	0.000223333	0.000210703	0.000222537	0.000223819	0.000209338	0.000217793	0.000216654	0.000210137	0.000212179	0.00022201	0.000224332	0.00021438	0.000214387	NADH-quinone oxidoreductase subunit B [EC:1.6.5.3]
K00332	0.000212402	0.000226708	0.000215927	0.000218638	0.000222214	0.000208313	0.000220314	0.000221158	0.000207395	0.000215713	0.000214167	0.000208412	0.000209989	0.000220821	0.000222367	0.000213534	0.000212275	NADH-quinone oxidoreductase subunit C [EC:1.6.5.3]
K00333	0.000211346	0.000230494	0.000217159	0.000218858	0.000225438	0.000207293	0.000221594	0.000220831	0.000206018	0.000214188	0.000214831	0.000209251	0.000210904	0.000222111	0.000224055	0.000214769	0.000205937	NADH-quinone oxidoreductase subunit D [EC:1.6.5.3]
K00334	0.000196952	0.00020643	0.000204828	0.000201714	0.000192586	0.000202392	0.000202698	0.000200139	0.00021252	0.000207169	0.000198705	0.000208024	0.000195808	0.000195981	0.00019472	0.000195529	0.000198997	NADH-quinone oxidoreductase subunit E [EC:1.6.5.3]
K00335	0.000266117	0.000261375	0.000285791	0.000281496	0.000255201	0.000293233	0.000277704	0.000274404	0.000293998	0.000282717	0.000282683	0.000284336	0.000276347	0.000265493	0.00027651	0.000280381	0.000293074	NADH-quinone oxidoreductase subunit F [EC:1.6.5.3]
K00336	0.00021866	0.00023064	0.000220923	0.000222214	0.000226103	0.000214145	0.000221451	0.000224856	0.000214396	0.000222939	0.000219765	0.000217261	0.000213968	0.000226838	0.000223795	0.000219411	0.000222231	NADH-quinone oxidoreductase subunit G [EC:1.6.5.3]
K00337	0.000201482	0.000208452	0.000203924	0.000206774	0.00021154	0.000200534	0.000205629	0.000207339	0.000200605	0.000204358	0.000200958	0.000199434	0.000202261	0.000210279	0.000207927	0.000201591	0.000203852	NADH-quinone oxidoreductase subunit H [EC:1.6.5.3]
K00338	0.000213088	0.000227307	0.00021689	0.000219927	0.000222655	0.000209933	0.000221331	0.000222437	0.00020885	0.000217138	0.000216048	0.000209581	0.000211633	0.000221405	0.000223401	0.000213947	0.000213575	NADH-quinone oxidoreductase subunit I [EC:1.6.5.3]
K00339	0.000201223	0.000207742	0.000203304	0.000206373	0.000211375	0.000200239	0.00020507	0.000206675	0.000200325	0.000203956	0.000200623	0.000198744	0.000202017	0.000209614	0.000207511	0.00020139	0.000203515	NADH-quinone oxidoreductase subunit J [EC:1.6.5.3]
K00340	0.00020122	0.000207739	0.000203262	0.000206343	0.000211367	0.000200231	0.000205054	0.000206616	0.000200314	0.000203868	0.000200617	0.000198736	0.000202013	0.000209573	0.000207492	0.000201387	0.000203504	NADH-quinone oxidoreductase subunit K [EC:1.6.5.3]
K00341	0.000234171	0.000245569	0.000249937	0.000266092	0.000248726	0.000258165	0.000256882	0.000254954	0.000257675	0.000255698	0.000253682	0.000246819	0.000248164	0.000257918	0.000265565	0.000251853	0.000257641	NADH-quinone oxidoreductase subunit L [EC:1.6.5.3]
K00342	0.000225009	0.000242819	0.000230917	0.000229758	0.000247116	0.000218464	0.000232733	0.000231522	0.000223645	0.000228209	0.000220748	0.000223251	0.000227389	0.000244719	0.000231252	0.000223143	0.000223335	NADH-quinone oxidoreductase subunit M [EC:1.6.5.3]
K00343	0.000203799	0.000211398	0.000205621	0.000209524	0.000216189	0.000203261	0.00020819	0.000209989	0.000203662	0.000207097	0.000203858	0.000202403	0.000204973	0.000213517	0.000210682	0.000204249	0.000206542	NADH-quinone oxidoreductase subunit N [EC:1.6.5.3]
K00344	0.0020785	0.00214182	0.00203662	0.00205835	0.00214249	0.00197778	0.00211363	0.00215063	0.00196232	0.00205164	0.00206498	0.00199297	0.00201557	0.00210856	0.00212479	0.00203899	0.00199835	NADPH2:quinone reductase [EC:1.6.5.5]
K00346	6.4798e-06	4.53901e-06	5.37789e-06	5.35546e-06	1.5168e-06	6.07954e-06	4.73843e-06	6.56536e-06	6.23131e-06	7.91508e-06	6.78836e-06	5.80809e-06	4.13707e-06	4.18224e-06	4.19452e-06	4.72159e-06	1.07113e-05	Na+-transporting NADH:ubiquinone oxidoreductase subunit A [EC:1.6.5.8]
K00347	6.4798e-06	4.53901e-06	5.37789e-06	5.35546e-06	1.5168e-06	6.07954e-06	4.73843e-06	6.56536e-06	6.23131e-06	7.91508e-06	6.78836e-06	5.80809e-06	4.13707e-06	4.18224e-06	4.19452e-06	4.72159e-06	1.07113e-05	Na+-transporting NADH:ubiquinone oxidoreductase subunit B [EC:1.6.5.8]
K00348	6.49266e-06	4.55995e-06	5.41234e-06	5.3806e-06	1.54184e-06	6.10445e-06	4.75777e-06	6.58574e-06	6.26683e-06	7.9421e-06	6.82191e-06	5.83635e-06	4.17622e-06	4.21578e-06	4.21271e-06	4.73839e-06	1.07397e-05	Na+-transporting NADH:ubiquinone oxidoreductase subunit C [EC:1.6.5.8]
K00349	6.4798e-06	4.53901e-06	5.37789e-06	5.35546e-06	1.5168e-06	6.07954e-06	4.73843e-06	6.56536e-06	6.23131e-06	7.91508e-06	6.78836e-06	5.80809e-06	4.13707e-06	4.18224e-06	4.19452e-06	4.72159e-06	1.07113e-05	Na+-transporting NADH:ubiquinone oxidoreductase subunit D [EC:1.6.5.8]
K00350	6.4798e-06	4.53901e-06	5.37789e-06	5.35546e-06	1.5168e-06	6.07954e-06	4.73843e-06	6.56536e-06	6.23131e-06	7.91508e-06	6.78836e-06	5.80809e-06	4.13707e-06	4.18224e-06	4.19452e-06	4.72159e-06	1.07113e-05	Na+-transporting NADH:ubiquinone oxidoreductase subunit E [EC:1.6.5.8]
K00351	4.6924e-05	3.53371e-05	3.33473e-05	3.57725e-05	3.87837e-05	3.66959e-05	3.317e-05	3.83983e-05	3.63925e-05	4.10533e-05	3.95233e-05	4.11007e-05	3.85104e-05	3.60036e-05	3.38826e-05	3.78469e-05	4.0394e-05	Na+-transporting NADH:ubiquinone oxidoreductase subunit F [EC:1.6.5.8]
K00354	0.000215391	0.000207937	0.000197757	0.000189272	0.000195782	0.000195076	0.000202197	0.000200718	0.000204102	0.00019977	0.000196824	0.000200972	0.000200006	0.000182773	0.000185313	0.000191824	0.00018549	NADPH2 dehydrogenase [EC:1.6.99.1]
K00355	0.000229904	0.000219519	0.000229832	0.000247627	0.000205968	0.000253861	0.000232062	0.000234556	0.000254791	0.000244099	0.000248146	0.000248783	0.000236658	0.000222279	0.000239499	0.000241158	0.000242286	NAD(P)H dehydrogenase (quinone) [EC:1.6.5.2]
K00356	0.000159737	0.000176167	0.000176386	0.000163893	0.000149182	0.000170566	0.000169538	0.000159051	0.000182206	0.000173194	0.000169379	0.000183665	0.000161706	0.000156387	0.000156636	0.000164789	0.000160436	NADH dehydrogenase [EC:1.6.99.3]
K00360	4.17588e-05	5.72538e-05	4.34012e-05	4.4992e-05	6.36308e-05	3.09659e-05	5.04282e-05	5.44013e-05	2.54899e-05	3.98938e-05	4.25455e-05	3.10446e-05	3.89316e-05	5.63377e-05	5.45704e-05	4.16246e-05	3.828e-05	assimilatory nitrate reductase electron transfer subunit [EC:1.7.99.-]
K00362	0.000331564	0.000338846	0.000325064	0.00031047	0.000361184	0.000301725	0.000326948	0.000325698	0.000291503	0.000318355	0.000317317	0.000306515	0.000326385	0.00034956	0.000325718	0.000322368	0.000331103	nitrite reductase (NADH) large subunit [EC:1.7.1.15]
K00363	0.000199859	0.000193094	0.000194033	0.000194059	0.000202261	0.000195421	0.000194896	0.000197417	0.000193858	0.000198375	0.00019847	0.000201386	0.000197702	0.000198645	0.000195613	0.000197649	0.000197474	nitrite reductase (NADH) small subunit [EC:1.7.1.15]
K00364	0.000116936	8.88561e-05	0.000114046	0.000115691	0.000101341	0.000126862	0.000109899	0.000106713	0.000131407	0.00011588	0.000115285	0.000121311	0.000118937	0.000105175	0.000109317	0.000118516	0.000116602	GMP reductase [EC:1.7.1.7]
K00365	3.38219e-05	4.63414e-05	3.64325e-05	3.5338e-05	4.95842e-05	2.39238e-05	4.00795e-05	4.08132e-05	1.94227e-05	3.13026e-05	3.41038e-05	2.35872e-05	3.15929e-05	4.4841e-05	4.24963e-05	3.2896e-05	3.02092e-05	urate oxidase [EC:1.7.3.3]
K00366	5.9078e-06	5.66688e-06	7.68261e-06	5.32098e-06	8.86925e-06	4.71352e-06	6.00713e-06	5.5531e-06	4.10812e-06	5.05183e-06	5.68631e-06	3.81547e-06	4.53935e-06	5.94393e-06	5.53576e-06	5.26647e-06	6.29082e-06	ferredoxin-nitrite reductase [EC:1.7.7.1]
K00367	0.000141625	0.000109435	0.000131711	0.000131785	0.000122664	0.00014802	0.000126275	0.000127517	0.000145406	0.000138014	0.000140818	0.000147598	0.000143755	0.000123694	0.00012686	0.000140903	0.000143951	ferredoxin-nitrate reductase [EC:1.7.7.2]
K00368	0.000106828	0.000101624	9.09824e-05	8.81674e-05	0.000102732	8.92504e-05	9.38278e-05	9.50894e-05	8.56546e-05	9.64251e-05	9.90949e-05	9.87836e-05	9.46211e-05	8.84785e-05	8.88874e-05	9.14929e-05	8.63786e-05	nitrite reductase (NO-forming) [EC:1.7.2.1]
K00370	4.53073e-05	5.39386e-05	6.51235e-05	7.05159e-05	4.92809e-05	7.34959e-05	6.66503e-05	6.28381e-05	6.46312e-05	6.34888e-05	7.04052e-05	5.7893e-05	5.93783e-05	5.65508e-05	7.19269e-05	6.30535e-05	6.96651e-05	nitrate reductase / nitrite oxidoreductase, alpha subunit [EC:1.7.5.1 1.7.99.-]
K00371	5.20789e-05	6.29635e-05	7.146e-05	8.05052e-05	5.6122e-05	7.87702e-05	7.33488e-05	7.13019e-05	7.03277e-05	7.03473e-05	7.67425e-05	6.30816e-05	6.49386e-05	6.25132e-05	8.00899e-05	6.92383e-05	7.78507e-05	nitrate reductase / nitrite oxidoreductase, beta subunit [EC:1.7.5.1 1.7.99.-]
K00372	0.000434165	0.000383012	0.000435045	0.000423684	0.000413346	0.000449956	0.000422226	0.00041159	0.000454121	0.000428211	0.000433261	0.000445416	0.000446437	0.000420794	0.000418397	0.00044334	0.000444039	assimilatory nitrate reductase catalytic subunit [EC:1.7.99.-]
K00373	4.93744e-05	5.93114e-05	6.84384e-05	7.50644e-05	5.6439e-05	7.63515e-05	7.17704e-05	7.04402e-05	6.66727e-05	6.74985e-05	7.43379e-05	6.08415e-05	6.29674e-05	6.30456e-05	7.87124e-05	6.70691e-05	7.344e-05	nitrate reductase molybdenum cofactor assembly chaperone NarJ/NarW
K00374	4.52639e-05	5.39468e-05	6.4831e-05	7.04674e-05	4.91854e-05	7.33963e-05	6.66002e-05	6.25457e-05	6.45204e-05	6.32623e-05	7.02943e-05	5.78315e-05	5.93137e-05	5.65347e-05	7.17875e-05	6.29749e-05	6.962e-05	nitrate reductase gamma subunit [EC:1.7.5.1 1.7.99.-]
K00375	0.000824625	0.000801242	0.000843319	0.000882246	0.000776742	0.00087376	0.000858153	0.000861607	0.000877668	0.000859096	0.000863629	0.000839519	0.000833116	0.000824189	0.000871612	0.000856464	0.000875418	GntR family transcriptional regulator / MocR family aminotransferase
K00376	4.1757e-05	3.33722e-05	3.40936e-05	2.81518e-05	3.77663e-05	4.22741e-05	2.73643e-05	3.12093e-05	2.95162e-05	3.28654e-05	4.03973e-05	4.13238e-05	4.1911e-05	2.89623e-05	2.93886e-05	3.80746e-05	3.81539e-05	nitrous-oxide reductase [EC:1.7.2.4]
K00380	0.000219181	0.000188381	0.000220332	0.000235646	0.000183836	0.000253981	0.000216137	0.000215217	0.000258734	0.000229858	0.000231069	0.000236777	0.000232378	0.000199834	0.000221595	0.000232014	0.000240722	sulfite reductase (NADPH) flavoprotein alpha-component [EC:1.8.1.2]
K00381	0.000148503	0.000136362	0.000149225	0.000149733	0.000128046	0.000164422	0.000143575	0.000142002	0.000172099	0.000156582	0.000150708	0.000164358	0.000151185	0.000135011	0.000139348	0.000149985	0.000156181	sulfite reductase (NADPH) hemoprotein beta-component [EC:1.8.1.2]
K00382	0.000963135	0.00100292	0.000996623	0.00101246	0.000968395	0.00100589	0.000998815	0.0010098	0.00100697	0.00101204	0.00100314	0.00100041	0.000970038	0.000992222	0.00101203	0.000989318	0.00100922	dihydrolipoamide dehydrogenase [EC:1.8.1.4]
K00383	0.000274998	0.000297782	0.000289695	0.00030359	0.00025925	0.000295638	0.000297332	0.000295003	0.000319354	0.000306824	0.000289031	0.000302425	0.000272372	0.000284958	0.000291854	0.00028343	0.000293592	glutathione reductase (NADPH) [EC:1.8.1.7]
K00384	0.000913427	0.000859841	0.000889497	0.000851701	0.000868217	0.000891449	0.000855806	0.000890126	0.000893429	0.00087991	0.000877949	0.000901369	0.000865576	0.000837342	0.000844299	0.000872794	0.000888687	thioredoxin reductase (NADPH) [EC:1.8.1.9]
K00387	2.8916e-05	1.47867e-05	2.607e-05	1.71349e-05	1.8636e-05	2.49377e-05	2.02816e-05	1.69679e-05	3.11003e-05	2.12926e-05	1.89306e-05	2.77546e-05	2.83588e-05	1.80197e-05	1.37793e-05	2.49385e-05	2.39054e-05	sulfite oxidase [EC:1.8.3.1]
K00389	4.00962e-05	5.65188e-05	4.18698e-05	4.45497e-05	6.01498e-05	3.07614e-05	4.78309e-05	4.8759e-05	2.58434e-05	3.86939e-05	4.16723e-05	3.00258e-05	3.69781e-05	5.20953e-05	5.10895e-05	4.08399e-05	3.7263e-05	putative membrane protein
K00390	0.000226731	0.000219802	0.000219646	0.000220167	0.000220038	0.000227959	0.000215697	0.00021894	0.000223719	0.000224634	0.000224862	0.000228585	0.000223173	0.000213789	0.000216303	0.000221949	0.000224537	phosphoadenosine phosphosulfate reductase [EC:1.8.4.8 1.8.4.10]
K00392	4.36607e-05	6.0156e-05	4.69171e-05	4.89712e-05	5.98486e-05	3.29316e-05	4.99424e-05	5.37304e-05	2.82333e-05	4.27324e-05	4.4125e-05	3.23962e-05	4.04372e-05	5.40683e-05	5.47539e-05	4.31238e-05	4.16722e-05	sulfite reductase (ferredoxin) [EC:1.8.7.1]
K00400	9.0282e-06	1.40428e-05	9.47882e-06	1.15683e-05	9.42445e-06	8.0351e-06	1.33367e-05	1.29904e-05	6.97958e-06	1.04377e-05	1.17346e-05	6.72174e-06	7.597e-06	8.40738e-06	1.33055e-05	9.18725e-06	8.89976e-06	methyl coenzyme M reductase system, component A2
K00404	0.000140902	0.000123596	0.000142094	0.000141269	0.000120453	0.000156873	0.000136432	0.000134627	0.000164369	0.000148819	0.000144044	0.000156266	0.000145304	0.000127688	0.000131828	0.000141791	0.000148406	cytochrome c oxidase cbb3-type subunit I [EC:1.9.3.1]
K00405	0.000140905	0.000123631	0.000142168	0.000141301	0.000120476	0.000156924	0.000136467	0.000134659	0.000164438	0.000148876	0.00014406	0.000156293	0.000145394	0.000127708	0.000131856	0.000141801	0.000148447	cytochrome c oxidase cbb3-type subunit II
K00406	0.000264629	0.000255424	0.000286681	0.000310811	0.000248736	0.000329881	0.000283169	0.000281787	0.000323217	0.000302627	0.000308807	0.000309252	0.000295777	0.000268249	0.00029662	0.000296031	0.000315056	cytochrome c oxidase cbb3-type subunit III
K00407	0.00013272	0.00011597	0.000134256	0.000133415	0.000114682	0.000148702	0.000129245	0.000125483	0.000155591	0.000138546	0.000134213	0.000147279	0.000138535	0.00012028	0.000124917	0.000134944	0.000135009	cytochrome c oxidase cbb3-type subunit IV
K00410	2.80717e-05	4.65031e-05	3.69749e-05	2.68248e-05	2.91682e-05	2.97182e-05	3.69649e-05	2.95999e-05	4.43427e-05	3.83039e-05	2.65673e-05	4.36894e-05	2.69537e-05	3.17976e-05	2.47976e-05	2.68647e-05	2.44376e-05	ubiquinol-cytochrome c reductase cytochrome b/c1 subunit
K00411	0.000167286	0.00016186	0.000172748	0.000166869	0.00015704	0.000187659	0.000160158	0.000160063	0.000181543	0.000171353	0.000172564	0.000180875	0.000177356	0.000157772	0.000160116	0.000171491	0.000180993	ubiquinol-cytochrome c reductase iron-sulfur subunit [EC:1.10.2.2]
K00412	0.000148042	0.000135634	0.000148916	0.000150448	0.00012646	0.000163442	0.000143338	0.000141955	0.000170616	0.000155872	0.000149826	0.000162277	0.000149961	0.000133359	0.000139553	0.000149079	0.000156028	ubiquinol-cytochrome c reductase cytochrome b subunit
K00413	0.000147558	0.000134723	0.00014831	0.000149516	0.000125637	0.000162665	0.000142403	0.000141123	0.000169979	0.000155038	0.000149042	0.000161725	0.000149371	0.000132603	0.000138674	0.000148516	0.000155246	ubiquinol-cytochrome c reductase cytochrome c1 subunit
K00423	5.88964e-06	8.05156e-06	5.44586e-06	7.74069e-06	5.47756e-06	5.5322e-06	5.21566e-06	6.86609e-06	5.42808e-06	6.29156e-06	5.73421e-06	5.26931e-06	5.19597e-06	5.39663e-06	6.31439e-06	5.4227e-06	6.8138e-06	L-ascorbate oxidase [EC:1.10.3.3]
K00424	1.97346e-05	3.01278e-05	2.64833e-05	2.07105e-05	1.86317e-05	2.50204e-05	2.192e-05	2.2126e-05	2.51785e-05	2.35077e-05	2.28054e-05	2.74704e-05	2.23539e-05	1.84124e-05	1.7686e-05	1.85744e-05	2.29559e-05	cytochrome bd-I ubiquinol oxidase subunit X [EC:1.10.3.14]
K00425	0.000209105	0.000219329	0.000211968	0.00021555	0.000212321	0.000214809	0.000212963	0.000222297	0.000207914	0.000215081	0.000215244	0.000211803	0.000208555	0.000209976	0.000219343	0.000211515	0.00021604	cytochrome bd ubiquinol oxidase subunit I [EC:1.10.3.14]
K00426	0.000181153	0.000205902	0.000186912	0.000199829	0.000195126	0.000190944	0.000193853	0.000206914	0.000177833	0.000195065	0.00019735	0.000184931	0.000181094	0.000192953	0.000207032	0.000187526	0.0001934	cytochrome bd ubiquinol oxidase subunit II [EC:1.10.3.14]
K00427	3.37596e-05	1.89413e-05	3.36983e-05	2.10993e-05	2.55829e-05	2.84972e-05	2.492e-05	2.18382e-05	3.43592e-05	2.55853e-05	2.35037e-05	3.08318e-05	3.21438e-05	2.27516e-05	1.79433e-05	2.91888e-05	2.8892e-05	L-lactate permease
K00428	0.000151164	0.000123044	0.000119463	0.000123677	0.000147169	0.000134743	0.000117105	0.000126214	0.000137922	0.000132586	0.000131552	0.00014834	0.000140449	0.000126626	0.000115589	0.000133832	0.000128395	cytochrome c peroxidase [EC:1.11.1.5]
K00432	0.000300475	0.000282278	0.000309277	0.000311987	0.000272444	0.000330956	0.000301012	0.000300463	0.000333408	0.000312943	0.000311102	0.000312724	0.000305354	0.000282843	0.000299508	0.00030471	0.000320205	glutathione peroxidase [EC:1.11.1.9]
K00433	0.000344402	0.00033947	0.000326101	0.000324541	0.00035249	0.000320074	0.000337202	0.000344804	0.000334879	0.000330309	0.000314438	0.000333043	0.000331355	0.000344514	0.000327867	0.000321863	0.000308463	non-heme chloroperoxidase [EC:1.11.1.10]
K00436	4.51453e-06	5.95827e-06	4.16526e-06	5.36935e-06	7.63191e-06	3.45957e-06	6.19385e-06	9.03964e-06	2.45316e-06	4.72158e-06	4.46186e-06	3.40293e-06	3.97001e-06	6.88769e-06	7.55363e-06	4.33991e-06	4.36041e-06	NAD-reducing hydrogenase large subunit [EC:1.12.1.2]
K00441	3.97874e-06	6.62861e-06	3.99146e-06	3.74338e-06	5.05692e-06	5.12074e-06	4.84869e-06	3.49777e-06	5.87016e-06	5.87433e-06	4.2603e-06	6.02331e-06	3.99258e-06	4.36018e-06	5.02964e-06	5.39516e-06	4.31807e-06	coenzyme F420 hydrogenase subunit beta [EC:1.12.98.1]
K00446	2.18349e-06	2.71744e-06	2.89465e-06	2.52357e-06	2.65688e-06	2.15703e-06	3.25298e-06	3.71822e-06	2.36967e-06	2.71903e-06	2.27742e-06	2.05547e-06	2.085e-06	2.12286e-06	2.68476e-06	1.78774e-06	2.2694e-06	catechol 2,3-dioxygenase [EC:1.13.11.2]
K00448	0.000101298	0.000110224	0.000115135	0.000115455	0.000101178	0.000110761	0.000118236	0.000111879	0.000118395	0.000112747	0.000110149	0.000110877	0.000109828	0.000115606	0.000115389	0.000111493	0.000114283	protocatechuate 3,4-dioxygenase, alpha subunit [EC:1.13.11.3]
K00449	0.000163804	0.000184468	0.000205322	0.00022858	0.000167792	0.000221039	0.000217505	0.000202623	0.000225914	0.000209909	0.000213728	0.000202624	0.000198475	0.000206454	0.000227261	0.000209673	0.000216344	protocatechuate 3,4-dioxygenase, beta subunit [EC:1.13.11.3]
K00450	6.92166e-05	6.31215e-05	7.10755e-05	8.41637e-05	7.00467e-05	8.42778e-05	7.7501e-05	7.6596e-05	8.17237e-05	7.985e-05	8.19104e-05	7.88988e-05	7.6678e-05	7.63331e-05	8.41532e-05	7.92717e-05	7.87671e-05	gentisate 1,2-dioxygenase [EC:1.13.11.4]
K00451	0.000142593	0.000130911	0.000123143	0.000123278	0.000137094	0.00011813	0.000123014	0.000129103	0.000121047	0.000126627	0.00012234	0.000124013	0.000126256	0.000126083	0.000122541	0.000126641	0.000124798	homogentisate 1,2-dioxygenase [EC:1.13.11.5]
K00452	1.04187e-05	1.44655e-05	1.01331e-05	1.51088e-05	1.1048e-05	8.92835e-06	1.04128e-05	1.33611e-05	8.94851e-06	1.14733e-05	1.0265e-05	8.80568e-06	9.15011e-06	9.70488e-06	1.30585e-05	1.01415e-05	1.24114e-05	3-hydroxyanthranilate 3,4-dioxygenase [EC:1.13.11.6]
K00453	0.000147791	0.00016206	0.000149944	0.000166923	0.000162626	0.000156498	0.000159702	0.00016564	0.000145475	0.000157419	0.000162221	0.000146482	0.000149667	0.000158913	0.000173046	0.000156113	0.000154548	tryptophan 2,3-dioxygenase [EC:1.13.11.11]
K00455	2.92348e-05	3.32677e-05	4.35498e-05	5.43773e-05	3.1416e-05	5.41244e-05	4.77327e-05	4.30306e-05	5.30592e-05	4.70572e-05	4.9481e-05	4.42201e-05	4.28323e-05	4.35406e-05	5.33884e-05	4.65942e-05	5.00157e-05	3,4-dihydroxyphenylacetate 2,3-dioxygenase [EC:1.13.11.15]
K00456	8.23064e-08	1.25669e-07	1.08672e-07	1.00543e-07	1.154e-07	7.74442e-08	1.03813e-07	1.61895e-07	6.77065e-08	9.767e-08	7.62785e-08	9.6497e-08	6.05933e-08	1.04194e-07	8.87806e-08	1.14435e-07	7.1867e-08	cysteine dioxygenase [EC:1.13.11.20]
K00457	0.000290858	0.000299837	0.000314761	0.000336527	0.000312092	0.000326097	0.000324297	0.000317481	0.000319042	0.000317914	0.000323602	0.000305353	0.000320017	0.000332162	0.000342837	0.000327694	0.000335698	4-hydroxyphenylpyruvate dioxygenase [EC:1.13.11.27]
K00459	0.000717947	0.000632154	0.000713619	0.000703571	0.000674736	0.000753304	0.000689936	0.000666192	0.000762964	0.000706535	0.000712918	0.000739253	0.000749097	0.000686332	0.000683922	0.000736065	0.000731245	nitronate monooxygenase [EC:1.13.12.16]
K00461	8.23064e-08	1.25669e-07	1.08672e-07	1.00543e-07	1.154e-07	7.74442e-08	1.03813e-07	1.61895e-07	6.77065e-08	9.767e-08	7.62785e-08	9.6497e-08	6.05933e-08	1.04194e-07	8.87806e-08	1.14435e-07	7.1867e-08	arachidonate 5-lipoxygenase [EC:1.13.11.34]
K00462	6.55021e-07	7.39197e-07	8.82926e-07	1.03983e-06	6.94033e-07	7.93971e-07	1.23253e-06	1.41601e-06	4.63031e-07	6.65334e-07	5.99044e-07	5.45471e-07	5.1733e-07	5.84136e-07	9.78042e-07	4.44571e-07	8.0157e-07	biphenyl-2,3-diol 1,2-dioxygenase [EC:1.13.11.39]
K00463	1.42493e-06	3.12026e-06	1.8006e-06	2.16697e-06	1.48278e-06	1.64451e-06	1.67933e-06	1.54026e-06	1.84916e-06	1.8204e-06	1.71885e-06	1.73573e-06	1.22616e-06	1.54728e-06	1.24438e-06	1.25606e-06	1.43545e-06	indoleamine 2,3-dioxygenase [EC:1.13.11.52]
K00464	1.44898e-05	2.30803e-05	1.64493e-05	1.52652e-05	2.10281e-05	2.18869e-05	1.56439e-05	1.53449e-05	1.7728e-05	1.75721e-05	1.99666e-05	2.22513e-05	1.83796e-05	1.70298e-05	1.62085e-05	1.82083e-05	1.99465e-05	all-trans-8-apo-beta-carotenal 15,15-oxygenase [EC:1.13.11.75]
K00466	5.10749e-05	6.39822e-05	6.46453e-05	7.67866e-05	6.70796e-05	6.81135e-05	7.18344e-05	6.93195e-05	6.3508e-05	6.5961e-05	6.86437e-05	5.92653e-05	6.42018e-05	7.70202e-05	8.13227e-05	6.89982e-05	6.7995e-05	tryptophan 2-monooxygenase [EC:1.13.12.3]
K00467	0.000211929	0.000211367	0.000227815	0.000204809	0.000228228	0.000204171	0.000222359	0.000209312	0.000210077	0.000202402	0.000202411	0.000202167	0.000223705	0.000225155	0.000211981	0.000214695	0.000210955	lactate 2-monooxygenase [EC:1.13.12.4]
K00471	6.43328e-05	4.73916e-05	4.57353e-05	4.99459e-05	5.23325e-05	5.47791e-05	4.64259e-05	5.23491e-05	5.53867e-05	5.60228e-05	5.37924e-05	5.77668e-05	5.2489e-05	4.84729e-05	4.71436e-05	5.26231e-05	5.29427e-05	gamma-butyrobetaine dioxygenase [EC:1.14.11.1]
K00472	0.000142152	0.000116187	0.000135591	0.000142142	0.000117769	0.000157078	0.000129983	0.000131257	0.000158537	0.000140704	0.000140458	0.00014733	0.000142948	0.000121426	0.000131377	0.000141188	0.000141329	prolyl 4-hydroxylase [EC:1.14.11.2]
K00476	3.52258e-05	4.41049e-05	4.85274e-05	6.22394e-05	3.66925e-05	5.81738e-05	5.66735e-05	5.20227e-05	5.57265e-05	5.2852e-05	5.80277e-05	4.68827e-05	4.81663e-05	4.88636e-05	6.34342e-05	5.26898e-05	5.47742e-05	aspartate beta-hydroxylase [EC:1.14.11.16]
K00477	5.12496e-06	7.84394e-06	7.38089e-06	4.55961e-06	6.68476e-06	1.0607e-05	4.64005e-06	5.29695e-06	4.95368e-06	5.25115e-06	8.92502e-06	8.72924e-06	8.52551e-06	4.72486e-06	5.14545e-06	6.82615e-06	9.54051e-06	phytanoyl-CoA hydroxylase [EC:1.14.11.18]
K00479	8.00772e-05	7.65705e-05	8.00866e-05	9.28854e-05	7.69702e-05	9.04532e-05	8.54773e-05	8.89309e-05	8.81872e-05	9.06679e-05	9.25234e-05	8.8224e-05	8.28731e-05	8.69203e-05	9.43458e-05	8.96258e-05	9.06171e-05	glycine betaine catabolism A
K00480	0.000273162	0.000308968	0.000281665	0.000283416	0.00030475	0.000249961	0.000301275	0.000301808	0.000260207	0.000278742	0.000270341	0.000266371	0.000270119	0.000303104	0.000297182	0.000272242	0.000260595	salicylate hydroxylase [EC:1.14.13.1]
K00481	0.000177227	0.000213244	0.00020843	0.00022005	0.000192749	0.00020211	0.000221173	0.000211361	0.000204092	0.000207627	0.000209897	0.000197126	0.000195866	0.000217428	0.000227979	0.000207004	0.000205579	p-hydroxybenzoate 3-monooxygenase [EC:1.14.13.2]
K00483	1.78033e-05	2.52215e-05	2.15153e-05	1.70861e-05	1.99735e-05	1.34005e-05	1.99382e-05	1.90538e-05	1.20393e-05	1.72581e-05	2.03584e-05	1.61523e-05	1.35272e-05	1.77331e-05	1.94977e-05	1.88254e-05	1.47374e-05	4-hydroxyphenylacetate 3-monooxygenase [EC:1.14.14.9]
K00484	4.35389e-05	5.30264e-05	5.50959e-05	6.8623e-05	5.88674e-05	6.0902e-05	6.21335e-05	5.96208e-05	5.68253e-05	5.68133e-05	6.03508e-05	5.0512e-05	5.88767e-05	6.89235e-05	7.28682e-05	6.07964e-05	6.10537e-05	flavin reductase (NADH) [EC:1.5.1.36]
K00485	2.51742e-07	6.9769e-07	6.39665e-07	4.12425e-07	1.52687e-07	2.86375e-07	5.5876e-07	7.04751e-07	2.70271e-07	4.73284e-07	3.19596e-07	6.81636e-07	2.24224e-07	6.84748e-07	4.17524e-07	1.89363e-07	3.30494e-07	dimethylaniline monooxygenase (N-oxide forming) [EC:1.14.13.8]
K00486	4.26605e-05	6.48528e-05	4.98311e-05	4.91302e-05	4.50155e-05	4.19857e-05	5.0168e-05	5.41778e-05	4.08306e-05	4.79709e-05	4.82146e-05	4.63189e-05	4.03872e-05	4.34497e-05	4.93973e-05	4.21353e-05	4.49479e-05	kynurenine 3-monooxygenase [EC:1.14.13.9]
K00491	2.8589e-05	4.35937e-05	3.08571e-05	2.98531e-05	3.81527e-05	1.95815e-05	3.36796e-05	3.22084e-05	1.63588e-05	2.69507e-05	3.01112e-05	2.25621e-05	2.67157e-05	3.77718e-05	3.54267e-05	2.96137e-05	2.33091e-05	nitric-oxide synthase, bacterial [EC:1.14.14.47]
K00493	0.00013761	0.000198878	0.000145357	0.000148219	0.000205457	0.000102006	0.000167753	0.000177873	9.26817e-05	0.000135592	0.000137303	0.000112238	0.000133046	0.000194309	0.000176045	0.00013531	0.000122468	unspecific monooxygenase [EC:1.14.14.1]
K00496	5.47897e-05	4.61782e-05	4.68292e-05	4.41423e-05	5.76172e-05	4.20025e-05	4.37304e-05	4.58722e-05	3.93501e-05	4.64266e-05	4.85079e-05	4.63842e-05	4.5399e-05	4.61638e-05	4.41454e-05	4.69845e-05	4.35405e-05	alkane 1-monooxygenase [EC:1.14.15.3]
K00499	0.000140989	0.000108824	0.000132249	0.000136793	0.000111896	0.000154816	0.000126245	0.000128372	0.000155515	0.000138754	0.000138336	0.000144912	0.000139937	0.000118216	0.000127571	0.000139402	0.000144022	choline monooxygenase [EC:1.14.15.7]
K00500	0.000117626	0.00010246	0.000115376	0.000123917	0.000103248	0.00012818	0.000114424	0.000113488	0.000133347	0.000124885	0.000120205	0.000126037	0.000120452	0.000109829	0.000116947	0.000123781	0.000128251	phenylalanine-4-hydroxylase [EC:1.14.16.1]
K00504	4.26836e-07	6.90717e-07	4.66143e-07	6.48635e-07	4.89906e-07	6.36389e-07	8.25417e-07	6.29351e-07	6.88276e-07	8.21675e-07	6.41428e-07	5.49064e-07	4.30441e-07	4.39567e-07	6.12586e-07	4.37033e-07	4.40848e-07	peptidylglycine monooxygenase [EC:1.14.17.3]
K00505	4.71997e-05	4.01271e-05	3.39048e-05	3.9626e-05	4.91952e-05	3.67631e-05	3.83432e-05	4.5067e-05	3.47067e-05	4.03456e-05	4.01441e-05	4.1666e-05	4.05812e-05	4.20986e-05	4.04328e-05	3.98587e-05	3.71804e-05	tyrosinase [EC:1.14.18.1]
K00507	0.000256557	0.000239412	0.000247122	0.000278955	0.000243679	0.000276109	0.000255517	0.000263508	0.000270035	0.000264753	0.000268667	0.000259928	0.000262199	0.000251662	0.000271948	0.000265211	0.000269897	stearoyl-CoA desaturase (Delta-9 desaturase) [EC:1.14.19.1]
K00508	6.76013e-05	8.61771e-05	7.22427e-05	6.91113e-05	0.000102709	4.99728e-05	6.95358e-05	7.12302e-05	4.37818e-05	6.12692e-05	6.46531e-05	5.11504e-05	6.47564e-05	8.90788e-05	7.60164e-05	6.55782e-05	6.35471e-05	linoleoyl-CoA desaturase [EC:1.14.19.3]
K00511	4.11532e-08	6.28343e-08	5.43362e-08	5.02715e-08	5.77e-08	3.87221e-08	5.19066e-08	8.09473e-08	3.38533e-08	4.8835e-08	3.81393e-08	4.82485e-08	3.02967e-08	5.20969e-08	4.43903e-08	5.72176e-08	3.59335e-08	squalene monooxygenase [EC:1.14.14.17]
K00518	3.48906e-05	4.80088e-05	3.71128e-05	3.70472e-05	5.15732e-05	2.49743e-05	4.15472e-05	4.23943e-05	2.00376e-05	3.23998e-05	3.52961e-05	2.43576e-05	3.21811e-05	4.5851e-05	4.44502e-05	3.4648e-05	3.14196e-05	nickel superoxide dismutase [EC:1.15.1.1]
K00520	7.30838e-05	9.21324e-05	8.25795e-05	7.12911e-05	8.54927e-05	6.50557e-05	7.99659e-05	7.97545e-05	7.68876e-05	7.7677e-05	6.64628e-05	7.61423e-05	6.65908e-05	8.30319e-05	6.93728e-05	6.45318e-05	6.21289e-05	mercuric reductase [EC:1.16.1.1]
K00523	0.000273692	0.000222072	0.000274781	0.000266584	0.000215042	0.000308779	0.000256243	0.000249691	0.000321431	0.000276198	0.000272269	0.000296979	0.000280815	0.000235229	0.000244866	0.000276373	0.000287623	CDP-4-dehydro-6-deoxyglucose reductase, E3 [EC:1.17.1.1]
K00524	1.80019e-05	1.25094e-05	1.322e-05	1.56431e-05	1.17888e-05	1.76462e-05	1.3454e-05	1.56735e-05	1.85649e-05	1.52365e-05	1.415e-05	1.49815e-05	1.39113e-05	1.13438e-05	1.35496e-05	1.38685e-05	1.31138e-05	ribonucleotide reductase, class II [EC:1.17.4.1]
K00525	0.000360029	0.000374798	0.000353985	0.000383408	0.000373221	0.000359438	0.000369303	0.000379189	0.000355158	0.000373744	0.000370785	0.000358958	0.000355529	0.000367175	0.000385196	0.000365498	0.000364134	ribonucleoside-diphosphate reductase alpha chain [EC:1.17.4.1]
K00526	0.000174475	0.000188654	0.000184616	0.000181379	0.000177116	0.000189962	0.000182015	0.00018353	0.000178959	0.0001831	0.00018856	0.000186473	0.000184542	0.000176561	0.000184347	0.000183288	0.000191057	ribonucleoside-diphosphate reductase beta chain [EC:1.17.4.1]
K00528	0.000258806	0.00024302	0.00024384	0.000250691	0.000263333	0.00023717	0.00024546	0.000253833	0.00023384	0.000250102	0.000247339	0.000233716	0.000240925	0.000253558	0.00025175	0.000246033	0.000256642	ferredoxin/flavodoxin---NADP+ reductase [EC:1.18.1.2 1.19.1.1]
K00529	0.000316372	0.000373967	0.000375108	0.000381207	0.000427496	0.000343838	0.000382321	0.00038405	0.000311287	0.000344397	0.000361588	0.000309214	0.000356625	0.000422749	0.00041539	0.000359826	0.000367109	3-phenylpropionate/trans-cinnamate dioxygenase ferredoxin reductase component [EC:1.18.1.3]
K00534	1.12528e-08	5.13402e-07	8.98314e-07	2.57972e-07	4.25401e-07	8.83874e-08	4.83444e-07	3.74028e-07	2.54177e-07	2.86256e-07	7.31672e-07	5.2175e-07	3.26689e-07	1.72408e-07	3.62399e-07	2.72465e-08	4.26947e-07	ferredoxin hydrogenase small subunit [EC:1.12.7.2]
K00537	0.000315684	0.000292956	0.00031207	0.000322453	0.000289315	0.000337993	0.000302168	0.000306712	0.000342298	0.00032342	0.000316397	0.000328835	0.000319436	0.000296324	0.000306469	0.000318505	0.000331517	arsenate reductase [EC:1.20.4.1]
K00542	2.89198e-06	4.74565e-06	5.3759e-06	1.84538e-06	2.46178e-06	8.01665e-06	2.01825e-06	2.45276e-06	2.03601e-06	2.46028e-06	6.12078e-06	5.46712e-06	5.95744e-06	1.19269e-06	2.45329e-06	4.30812e-06	6.9016e-06	guanidinoacetate N-methyltransferase [EC:2.1.1.2]
K00547	3.44787e-05	4.78278e-05	3.81828e-05	3.44424e-05	5.18541e-05	2.47191e-05	3.83581e-05	4.03468e-05	2.16373e-05	3.23492e-05	3.36559e-05	2.92132e-05	3.236e-05	4.8428e-05	4.04786e-05	3.48599e-05	2.98771e-05	homocysteine S-methyltransferase [EC:2.1.1.10]
K00548	0.000323531	0.000311307	0.000323037	0.000333302	0.000307031	0.000339153	0.000321059	0.000320642	0.000350041	0.000334738	0.000327183	0.000338498	0.000324223	0.000312058	0.000322024	0.000328982	0.000328656	5-methyltetrahydrofolate--homocysteine methyltransferase [EC:2.1.1.13]
K00549	0.000193337	0.000195847	0.000216627	0.000219122	0.000171866	0.000238108	0.000214551	0.000205094	0.000243202	0.000222336	0.000220765	0.000229645	0.000210675	0.000192242	0.000208827	0.000210671	0.000222985	5-methyltetrahydropteroyltriglutamate--homocysteine methyltransferase [EC:2.1.1.14]
K00554	0.000186584	0.000188898	0.000189814	0.000191609	0.000184816	0.000192462	0.000189029	0.000189117	0.000195756	0.000192889	0.000189623	0.000192731	0.000186547	0.000185611	0.00018792	0.000187579	0.000191528	tRNA (guanine37-N1)-methyltransferase [EC:2.1.1.228]
K00556	2.68666e-06	3.92392e-06	2.28919e-06	3.50207e-06	5.15718e-06	2.98079e-06	3.27989e-06	3.59463e-06	3.13914e-06	3.25179e-06	3.34226e-06	3.56179e-06	2.7674e-06	3.98821e-06	3.57917e-06	3.4009e-06	3.11789e-06	tRNA (guanosine-2-O-)-methyltransferase [EC:2.1.1.34]
K00557	6.103e-06	4.09074e-06	4.98958e-06	5.0029e-06	1.30614e-06	5.62497e-06	4.21835e-06	6.08647e-06	5.63139e-06	7.28854e-06	6.42532e-06	5.35266e-06	3.85839e-06	3.8384e-06	3.98821e-06	4.39327e-06	1.04617e-05	tRNA (uracil-5-)-methyltransferase [EC:2.1.1.35]
K00558	0.000203439	0.000247878	0.000212496	0.00019126	0.000231767	0.0001755	0.000215187	0.000209532	0.000185402	0.000199321	0.000191689	0.000197206	0.000197925	0.000218681	0.000203057	0.000200033	0.00018266	DNA (cytosine-5)-methyltransferase 1 [EC:2.1.1.37]
K00560	0.000165643	0.00015984	0.000169088	0.000168289	0.000149196	0.000178815	0.00016356	0.000161029	0.000185434	0.000174299	0.000169811	0.00017932	0.000164522	0.000152071	0.000159565	0.000167803	0.000172763	thymidylate synthase [EC:2.1.1.45]
K00561	1.45511e-06	2.83397e-06	2.1618e-06	2.50749e-06	1.70685e-06	1.59521e-06	2.93863e-06	3.38361e-06	1.14061e-06	1.95835e-06	1.69039e-06	2.11208e-06	1.10286e-06	2.26419e-06	2.5448e-06	1.51523e-06	1.84144e-06	23S rRNA (adenine-N6)-dimethyltransferase [EC:2.1.1.184]
K00563	6.71622e-05	6.27445e-05	5.3401e-05	5.49169e-05	5.77218e-05	5.23138e-05	5.37738e-05	6.27869e-05	5.04559e-05	6.31233e-05	6.11537e-05	6.18479e-05	5.24645e-05	5.7631e-05	5.65556e-05	5.92505e-05	6.16825e-05	23S rRNA (guanine745-N1)-methyltransferase [EC:2.1.1.187]
K00564	5.71164e-05	6.68984e-05	7.11456e-05	8.67891e-05	5.90617e-05	7.84137e-05	7.46321e-05	7.43515e-05	7.71391e-05	7.72879e-05	7.75415e-05	6.80199e-05	6.55678e-05	6.86907e-05	8.42434e-05	7.33973e-05	8.49479e-05	16S rRNA (guanine1207-N2)-methyltransferase [EC:2.1.1.172]
K00566	0.000189008	0.000192965	0.000190444	0.000196616	0.000185564	0.000188642	0.000196078	0.000194805	0.00019661	0.000196488	0.000190976	0.00018948	0.000184622	0.000187827	0.000193956	0.000188136	0.000189272	tRNA-uridine 2-sulfurtransferase [EC:2.8.1.13]
K00567	0.000355813	0.000380582	0.000371658	0.000381402	0.000377615	0.000366994	0.000376069	0.000375876	0.00036749	0.000368167	0.000366293	0.000358058	0.000369695	0.00038026	0.000380935	0.000363737	0.000369288	methylated-DNA-[protein]-cysteine S-methyltransferase [EC:2.1.1.63]
K00568	0.000384112	0.000374233	0.000396177	0.000409044	0.000345787	0.000432095	0.000391739	0.000388862	0.000442738	0.000412469	0.000405554	0.000422122	0.000396972	0.000372606	0.000389819	0.00039797	0.000415273	2-polyprenyl-6-hydroxyphenyl methylase / 3-demethylubiquinone-9 3-methyltransferase [EC:2.1.1.222 2.1.1.64]
K00569	2.22809e-05	2.84204e-05	2.36553e-05	2.50538e-05	1.95703e-05	2.49845e-05	2.39617e-05	2.67397e-05	1.88564e-05	2.51157e-05	2.90306e-05	2.15027e-05	2.17693e-05	1.83003e-05	2.55135e-05	2.2346e-05	3.157e-05	thiopurine S-methyltransferase [EC:2.1.1.67]
K00570	1.41535e-05	1.88304e-05	1.50006e-05	1.76063e-05	1.29698e-05	1.48354e-05	1.4967e-05	1.71255e-05	1.4968e-05	1.69303e-05	1.39239e-05	1.48922e-05	1.22609e-05	1.41403e-05	1.47289e-05	1.3055e-05	1.5995e-05	phosphatidylethanolamine/phosphatidyl-N-methylethanolamine N-methyltransferase [EC:2.1.1.17 2.1.1.71]
K00571	0.000209863	0.000221878	0.000234309	0.000264709	0.000228402	0.00026685	0.000244812	0.000240153	0.000253776	0.000246616	0.000261222	0.000246665	0.000247321	0.000247089	0.000264743	0.000247252	0.000253374	site-specific DNA-methyltransferase (adenine-specific) [EC:2.1.1.72]
K00573	0.000446212	0.000454376	0.000436883	0.000451448	0.000472468	0.000431362	0.000443487	0.000456456	0.00042218	0.000440098	0.000438221	0.000433319	0.000440978	0.000459247	0.000458701	0.000446057	0.000436883	protein-L-isoaspartate(D-aspartate) O-methyltransferase [EC:2.1.1.77]
K00574	0.000433843	0.000455545	0.000496868	0.000523497	0.000416513	0.000532379	0.000494335	0.000478368	0.00054646	0.000507167	0.000498551	0.000505179	0.000472665	0.000465277	0.000503375	0.000491286	0.000510745	cyclopropane-fatty-acyl-phospholipid synthase [EC:2.1.1.79]
K00575	0.000428722	0.00036193	0.000381415	0.000365216	0.000361706	0.000421317	0.000362798	0.000371304	0.000431135	0.000401925	0.000390671	0.000434675	0.000402612	0.000346635	0.000346033	0.000393741	0.00039798	chemotaxis protein methyltransferase CheR [EC:2.1.1.80]
K00587	4.65545e-07	8.58224e-07	4.58103e-07	7.92438e-07	8.68766e-07	5.25274e-07	7.29746e-07	9.17025e-07	4.32878e-07	6.04723e-07	5.1531e-07	4.17885e-07	4.28726e-07	5.05014e-07	8.44871e-07	5.50379e-07	6.3451e-07	protein-S-isoprenylcysteine O-methyltransferase [EC:2.1.1.100]
K00588	4.87958e-05	6.76737e-05	4.8763e-05	5.3223e-05	5.93646e-05	3.8276e-05	5.93492e-05	6.19874e-05	3.37464e-05	5.08959e-05	5.42956e-05	3.74318e-05	4.43225e-05	5.78297e-05	6.20393e-05	4.73395e-05	4.89473e-05	caffeoyl-CoA O-methyltransferase [EC:2.1.1.104]
K00590	8.36353e-07	7.01053e-07	1.14371e-06	1.40555e-06	6.03854e-07	1.65787e-06	1.15857e-06	1.43724e-06	1.49035e-06	1.5506e-06	1.9409e-06	1.20985e-06	1.67889e-06	6.67491e-07	1.09035e-06	4.88317e-07	1.37766e-06	site-specific DNA-methyltransferase (cytosine-N4-specific) [EC:2.1.1.113]
K00594	5.46504e-05	8.22122e-05	6.12345e-05	5.76837e-05	7.19435e-05	4.27192e-05	6.70333e-05	6.9497e-05	4.38887e-05	5.75501e-05	5.73847e-05	5.34586e-05	5.09582e-05	7.08661e-05	6.5877e-05	5.41631e-05	4.61185e-05	alditol oxidase [EC:1.1.3.41]
K00595	0.000148037	0.000159977	0.000141066	0.000130017	0.000166579	0.000114078	0.000145835	0.000147888	0.000115895	0.000133084	0.000132325	0.000129337	0.000136757	0.00015514	0.000141144	0.000135236	0.000121109	precorrin-6Y C5,15-methyltransferase (decarboxylating) [EC:2.1.1.132]
K00596	3.08849e-05	3.32319e-05	2.7849e-05	3.03628e-05	2.39295e-05	2.838e-05	3.10401e-05	3.2756e-05	2.83618e-05	2.98998e-05	3.07422e-05	2.69272e-05	2.42678e-05	2.42518e-05	3.04833e-05	2.73018e-05	2.41717e-05	2,2-dialkylglycine decarboxylase (pyruvate) [EC:4.1.1.64]
K00598	0.000176566	0.000175501	0.00018251	0.000180597	0.000169453	0.00017555	0.000181361	0.000181064	0.000181357	0.000176043	0.000177721	0.000175151	0.000174669	0.000176422	0.000181351	0.000182972	0.000179421	trans-aconitate 2-methyltransferase [EC:2.1.1.144]
K00600	0.000275105	0.000278064	0.000262114	0.000267975	0.00029083	0.00025287	0.000267528	0.000279601	0.00024806	0.000268549	0.000264014	0.000258466	0.00026311	0.00028505	0.000275397	0.000266116	0.000270586	glycine hydroxymethyltransferase [EC:2.1.2.1]
K00602	0.000220691	0.000210552	0.000211389	0.000214148	0.000213965	0.000216774	0.000210655	0.000212834	0.000218671	0.000218448	0.000215479	0.000220739	0.000214537	0.000209639	0.00021028	0.00021454	0.000214027	phosphoribosylaminoimidazolecarboxamide formyltransferase / IMP cyclohydrolase [EC:2.1.2.3 3.5.4.10]
K00604	0.000217277	0.0002341	0.000226302	0.000223467	0.000220365	0.000215969	0.000226254	0.000227982	0.000216736	0.000224539	0.000225906	0.000220848	0.000210971	0.000218677	0.000225897	0.000219478	0.000217913	methionyl-tRNA formyltransferase [EC:2.1.2.9]
K00605	0.000205417	0.000211906	0.000208536	0.000210756	0.000203653	0.000207399	0.000209683	0.000217274	0.000208458	0.000213827	0.000209733	0.000209119	0.000200849	0.00020688	0.000211148	0.000205587	0.000212748	aminomethyltransferase [EC:2.1.2.10]
K00606	0.000197359	0.000207074	0.0002055	0.000202425	0.000193133	0.000201908	0.000204466	0.00020188	0.000210897	0.000206677	0.000200277	0.000206674	0.00019619	0.000196058	0.000197535	0.000196104	0.000199703	3-methyl-2-oxobutanoate hydroxymethyltransferase [EC:2.1.2.11]
K00609	0.000167611	0.000175014	0.000175795	0.000175357	0.000171142	0.000173918	0.000174741	0.000172705	0.000175644	0.000176957	0.000174223	0.000175322	0.000171378	0.000172219	0.000173706	0.000172514	0.000177693	aspartate carbamoyltransferase catalytic subunit [EC:2.1.3.2]
K00611	0.000313939	0.000285667	0.000316747	0.000307676	0.000291104	0.000325851	0.00030974	0.000300384	0.000344215	0.000316796	0.000309154	0.000331853	0.000321407	0.00030058	0.000297703	0.000315589	0.000314667	ornithine carbamoyltransferase [EC:2.1.3.3]
K00612	0.000160479	0.000175216	0.000137448	0.000146017	0.00017465	0.000127381	0.000151658	0.00015888	0.000111329	0.000145122	0.000156189	0.000133003	0.000145349	0.000158652	0.000159426	0.00014729	0.000138394	carbamoyltransferase [EC:2.1.3.-]
K00613	9.00319e-06	1.45681e-05	1.02395e-05	1.02179e-05	8.66294e-06	7.22431e-06	1.20217e-05	1.18448e-05	6.31834e-06	9.72082e-06	1.13843e-05	8.37531e-06	7.14062e-06	8.76741e-06	1.16312e-05	9.57702e-06	7.53547e-06	glycine amidinotransferase [EC:2.1.4.1]
K00615	0.000432465	0.000491309	0.000465699	0.000478923	0.000482044	0.000441458	0.000483813	0.000479969	0.000444369	0.000470059	0.000465442	0.000446467	0.000441695	0.000497025	0.000492495	0.000455664	0.000456931	transketolase [EC:2.2.1.1]
K00616	0.000199594	0.000216237	0.000208151	0.000205424	0.00021384	0.000201933	0.000205797	0.000208002	0.00019557	0.000206351	0.000206936	0.00020263	0.000203823	0.000212284	0.000208977	0.000205202	0.000214188	transaldolase [EC:2.2.1.2]
K00619	3.34029e-05	4.89429e-05	3.41431e-05	3.7902e-05	4.69191e-05	2.44681e-05	4.02133e-05	4.27892e-05	2.03031e-05	3.23962e-05	3.41662e-05	2.49626e-05	3.17766e-05	4.4429e-05	4.40284e-05	3.31405e-05	3.05386e-05	amino-acid N-acetyltransferase [EC:2.3.1.1]
K00620	0.000174075	0.000171015	0.000177445	0.000173796	0.000169946	0.000181168	0.000175906	0.000172778	0.000183964	0.000178649	0.000176613	0.000180404	0.000174993	0.000172109	0.000172222	0.000175032	0.000176626	glutamate N-acetyltransferase / amino-acid N-acetyltransferase [EC:2.3.1.35 2.3.1.1]
K00622	4.61546e-06	7.65674e-06	5.47709e-06	4.18497e-06	4.36833e-06	3.23064e-06	4.81348e-06	4.83969e-06	3.13104e-06	4.6094e-06	5.47588e-06	5.31174e-06	3.33583e-06	4.81766e-06	4.94588e-06	5.49016e-06	3.06305e-06	arylamine N-acetyltransferase [EC:2.3.1.5]
K00624	2.51742e-07	6.9769e-07	6.39665e-07	4.12425e-07	1.52687e-07	2.86375e-07	5.5876e-07	7.04751e-07	2.70271e-07	4.73284e-07	3.19596e-07	6.81636e-07	2.24224e-07	6.84748e-07	4.17524e-07	1.89363e-07	3.30494e-07	carnitine O-acetyltransferase [EC:2.3.1.7]
K00625	0.000135682	9.11784e-05	0.000109904	9.57258e-05	0.000106395	0.000110695	9.8468e-05	9.8796e-05	0.000121707	0.000109162	0.000101003	0.000118266	0.000121413	0.000103242	8.74291e-05	0.000113617	0.000115392	phosphate acetyltransferase [EC:2.3.1.8]
K00626	0.00162758	0.00161998	0.0017196	0.00171782	0.00165599	0.00172073	0.001703	0.00166479	0.00173013	0.00169755	0.00169012	0.00167148	0.00168557	0.00170831	0.0017137	0.00171676	0.00174193	acetyl-CoA C-acetyltransferase [EC:2.3.1.9]
K00627	0.000487249	0.000542989	0.000514699	0.000543225	0.000516028	0.000509697	0.000530389	0.000535615	0.000511341	0.000526037	0.000521953	0.000506772	0.000494903	0.000517502	0.000545644	0.00051176	0.000513382	pyruvate dehydrogenase E2 component (dihydrolipoamide acetyltransferase) [EC:2.3.1.12]
K00631	2.60345e-05	2.94463e-05	2.70809e-05	2.94519e-05	2.82298e-05	2.3384e-05	2.50881e-05	2.96639e-05	2.44889e-05	2.88277e-05	2.75167e-05	2.42824e-05	2.23304e-05	2.55347e-05	2.64767e-05	2.35647e-05	3.34218e-05	glycerol-3-phosphate O-acyltransferase [EC:2.3.1.15]
K00632	0.00108377	0.00104112	0.001114	0.00110366	0.00108376	0.0011263	0.0010987	0.0010864	0.00113334	0.00110214	0.00109691	0.00110047	0.00110706	0.00109803	0.00110002	0.00111337	0.00112564	acetyl-CoA acyltransferase [EC:2.3.1.16]
K00633	2.08664e-05	2.77417e-05	2.04605e-05	2.29895e-05	3.39478e-05	1.55826e-05	2.45086e-05	2.63823e-05	1.21614e-05	1.95621e-05	2.11503e-05	1.3582e-05	2.35118e-05	3.12298e-05	2.78892e-05	1.97258e-05	1.94285e-05	galactoside O-acetyltransferase [EC:2.3.1.18]
K00634	7.1119e-05	4.4567e-05	5.412e-05	4.69341e-05	5.31499e-05	5.63047e-05	4.87361e-05	4.92594e-05	6.19348e-05	5.68928e-05	5.29401e-05	6.43892e-05	6.1773e-05	4.99646e-05	4.25362e-05	5.90812e-05	5.85958e-05	phosphate butyryltransferase [EC:2.3.1.19]
K00635	6.18535e-05	8.00794e-05	7.60197e-05	6.3675e-05	7.95598e-05	5.01217e-05	6.9338e-05	7.09098e-05	4.51033e-05	6.0701e-05	6.7437e-05	5.12421e-05	4.99465e-05	6.44913e-05	6.86865e-05	5.96482e-05	6.06969e-05	diacylglycerol O-acyltransferase [EC:2.3.1.20]
K00638	7.25843e-05	8.81884e-05	8.71489e-05	9.61188e-05	6.41239e-05	9.15542e-05	9.29016e-05	9.19082e-05	9.70464e-05	9.75404e-05	9.52348e-05	9.04046e-05	7.58599e-05	8.48379e-05	9.30095e-05	8.52454e-05	0.000101561	chloramphenicol O-acetyltransferase type B [EC:2.3.1.28]
K00639	0.000162566	0.000165285	0.000157757	0.000147539	0.000152425	0.000147921	0.000154179	0.000154158	0.000159485	0.000153539	0.000144644	0.000155888	0.000152712	0.000144477	0.000142606	0.000151366	0.000154218	glycine C-acetyltransferase [EC:2.3.1.29]
K00640	0.000372937	0.000315199	0.000354623	0.000310016	0.000302371	0.000376909	0.000322956	0.000314608	0.00038944	0.000348672	0.000344803	0.00039248	0.00036665	0.000296352	0.000287789	0.000345432	0.000352546	serine O-acetyltransferase [EC:2.3.1.30]
K00641	0.000296272	0.000249383	0.000276424	0.000267567	0.000246285	0.000293238	0.000257514	0.000263538	0.000298835	0.000278683	0.00027617	0.000292414	0.000283557	0.000240846	0.000250574	0.000278941	0.000289806	homoserine O-acetyltransferase/O-succinyltransferase [EC:2.3.1.31 2.3.1.46]
K00643	6.69322e-05	7.21737e-05	6.85348e-05	5.52686e-05	7.03596e-05	6.11423e-05	6.62096e-05	5.56977e-05	7.47134e-05	6.65306e-05	5.37747e-05	7.11218e-05	6.6198e-05	6.69068e-05	5.38542e-05	6.39555e-05	5.90388e-05	5-aminolevulinate synthase [EC:2.3.1.37]
K00645	0.000682973	0.000754949	0.000722146	0.000776866	0.000736115	0.000738481	0.000753138	0.000750615	0.000690981	0.000731488	0.00077348	0.000706281	0.000730645	0.000771029	0.000807134	0.000753828	0.000746229	[acyl-carrier-protein] S-malonyltransferase [EC:2.3.1.39]
K00646	5.01683e-06	7.29771e-06	6.96865e-06	4.3282e-06	4.34873e-06	9.96976e-06	3.4523e-06	4.35219e-06	3.89072e-06	4.44225e-06	8.02157e-06	6.99755e-06	7.77524e-06	2.68869e-06	4.48415e-06	6.39588e-06	9.06328e-06	malonyl-ACP decarboxylase
K00647	0.000477202	0.000457264	0.000470482	0.000462848	0.000465915	0.000475862	0.000454765	0.000456242	0.000485899	0.000467667	0.000455948	0.00047818	0.000481739	0.000464106	0.000449728	0.000469576	0.000472217	3-oxoacyl-[acyl-carrier-protein] synthase I [EC:2.3.1.41]
K00648	0.000398726	0.000436057	0.000402903	0.000417497	0.00044713	0.000386994	0.000420673	0.000424193	0.000382098	0.000404857	0.000407174	0.000393846	0.000402464	0.000436854	0.000436658	0.000413024	0.000392459	3-oxoacyl-[acyl-carrier-protein] synthase III [EC:2.3.1.180]
K00651	1.04391e-05	1.71272e-05	1.48506e-05	9.94993e-06	9.81477e-06	1.00572e-05	1.41381e-05	1.17286e-05	1.68486e-05	1.38556e-05	9.35456e-06	1.62696e-05	9.71837e-06	1.19035e-05	7.65012e-06	8.31944e-06	8.13289e-06	homoserine O-succinyltransferase/O-acetyltransferase [EC:2.3.1.46 2.3.1.31]
K00652	0.000237596	0.000245523	0.000242093	0.000231722	0.000240278	0.000241589	0.000237291	0.000229094	0.000244421	0.000242277	0.000234911	0.000244408	0.000241318	0.000236704	0.000231038	0.000241811	0.000249095	8-amino-7-oxononanoate synthase [EC:2.3.1.47]
K00655	0.000838791	0.000853088	0.000863538	0.000873271	0.000880963	0.000855701	0.000870941	0.000862725	0.000824173	0.000846411	0.000873098	0.000821542	0.000860482	0.000873369	0.000890342	0.000864304	0.000867823	1-acyl-sn-glycerol-3-phosphate acyltransferase [EC:2.3.1.51]
K00656	2.4251e-05	3.43451e-05	2.39926e-05	2.69929e-05	3.75579e-05	1.67844e-05	3.04486e-05	3.16253e-05	1.29879e-05	2.25616e-05	2.39103e-05	1.52627e-05	2.4263e-05	3.49482e-05	3.32598e-05	2.33547e-05	2.17656e-05	formate C-acetyltransferase [EC:2.3.1.54]
K00657	0.00017946	0.000187159	0.000165201	0.000158437	0.000194646	0.000145393	0.000167417	0.000175436	0.000142095	0.000158984	0.000158006	0.000154216	0.000167662	0.00018294	0.000167525	0.000161957	0.000155699	diamine N-acetyltransferase [EC:2.3.1.57]
K00658	0.000213623	0.000218449	0.000219354	0.000220134	0.000213338	0.0002144	0.000216806	0.000218385	0.000216676	0.000220523	0.000216147	0.000211746	0.000205639	0.00020846	0.000216079	0.000212352	0.000224598	2-oxoglutarate dehydrogenase E2 component (dihydrolipoamide succinyltransferase) [EC:2.3.1.61]
K00661	0.000268888	0.000273888	0.000269429	0.000258278	0.000255469	0.000258964	0.000267653	0.000264404	0.000270781	0.000270234	0.000264014	0.000269766	0.000259939	0.000262056	0.000254679	0.000262085	0.000272678	maltose O-acetyltransferase [EC:2.3.1.79]
K00662	1.95351e-05	2.68478e-05	1.89307e-05	2.08816e-05	3.51939e-05	1.34307e-05	2.25487e-05	2.48105e-05	1.08532e-05	1.73866e-05	1.71432e-05	1.4251e-05	2.10559e-05	3.2712e-05	2.55973e-05	1.92025e-05	1.78009e-05	aminoglycoside 3-N-acetyltransferase [EC:2.3.1.81]
K00663	1.4447e-05	2.2112e-05	1.57527e-05	1.63674e-05	1.73706e-05	1.19018e-05	1.89924e-05	2.13477e-05	1.05153e-05	1.62049e-05	1.72765e-05	1.35814e-05	1.20371e-05	1.7481e-05	2.01237e-05	1.51294e-05	1.28966e-05	aminoglycoside 6-N-acetyltransferase [EC:2.3.1.82]
K00666	0.00203182	0.00201426	0.00207755	0.00215586	0.00216701	0.00207509	0.00213435	0.00209329	0.00205614	0.00207044	0.00209666	0.00199792	0.00210322	0.00218887	0.00219905	0.00213243	0.00208951	fatty-acyl-CoA synthase [EC:6.2.1.-]
K00672	1.7683e-08	5.23874e-07	9.15543e-07	2.7054e-07	4.37921e-07	1.00846e-07	4.93113e-07	3.84217e-07	2.71936e-07	2.99764e-07	7.48447e-07	5.35881e-07	3.46268e-07	1.89177e-07	3.71496e-07	3.56475e-08	4.41131e-07	formylmethanofuran--tetrahydromethanopterin N-formyltransferase [EC:2.3.1.101]
K00673	2.05366e-05	2.17546e-05	1.8857e-05	1.9247e-05	1.40265e-05	2.13621e-05	1.83488e-05	2.10921e-05	2.30812e-05	2.60911e-05	2.2241e-05	2.25382e-05	1.61838e-05	1.76605e-05	1.76509e-05	1.85944e-05	2.99225e-05	arginine N-succinyltransferase [EC:2.3.1.109]
K00674	0.000184375	0.000185381	0.000187467	0.000188797	0.000180788	0.000189894	0.000186168	0.000185982	0.000192803	0.000189953	0.00018679	0.000189114	0.000183968	0.000181731	0.000185103	0.000185122	0.000188862	2,3,4,5-tetrahydropyridine-2,6-dicarboxylate N-succinyltransferase [EC:2.3.1.117]
K00675	5.79815e-05	8.80615e-05	6.44641e-05	6.20556e-05	7.51526e-05	4.54107e-05	7.03557e-05	7.34192e-05	4.70533e-05	6.14931e-05	5.99511e-05	5.71214e-05	5.35001e-05	7.49042e-05	6.96964e-05	5.7695e-05	4.97314e-05	N-hydroxyarylamine O-acetyltransferase [EC:2.3.1.118]
K00677	0.000206148	0.000183309	0.000217948	0.00022117	0.000176663	0.00024276	0.000211318	0.000202099	0.000254566	0.00022434	0.000217348	0.00023495	0.000221154	0.000195299	0.000207465	0.000221873	0.000229916	UDP-N-acetylglucosamine acyltransferase [EC:2.3.1.129]
K00681	0.00047343	0.000428544	0.00046447	0.000476713	0.000447405	0.000488207	0.000462371	0.000465806	0.000487494	0.000471533	0.000471862	0.000475351	0.000477249	0.000453068	0.000469917	0.000481492	0.000483649	gamma-glutamyltranspeptidase / glutathione hydrolase [EC:2.3.2.2 3.4.19.13]
K00684	0.000155469	0.000143334	0.000157838	0.00015749	0.000138644	0.000169835	0.000150861	0.000149361	0.000176762	0.000162708	0.000157372	0.000168578	0.000156296	0.000141873	0.000146794	0.000156172	0.000163982	leucyl/phenylalanyl-tRNA---protein transferase [EC:2.3.2.6]
K00688	0.000103308	0.000106925	9.45009e-05	9.19052e-05	0.000111815	8.44507e-05	9.89059e-05	0.000101147	8.75163e-05	9.59691e-05	9.21997e-05	9.31762e-05	9.01639e-05	0.000102009	9.40601e-05	8.94909e-05	8.24642e-05	glycogen phosphorylase [EC:2.4.1.1]
K00690	6.34723e-06	4.8869e-06	4.98546e-06	5.11745e-06	1.94248e-06	5.19213e-06	4.60799e-06	6.14195e-06	5.47008e-06	7.37565e-06	5.82928e-06	5.23082e-06	3.00709e-06	4.46893e-06	4.23527e-06	4.91526e-06	1.03526e-05	sucrose phosphorylase [EC:2.4.1.7]
K00691	1.3632e-07	1.22093e-07	1.37534e-07	1.60516e-07	1.39351e-07	2.20211e-07	1.75736e-07	1.96991e-07	1.50952e-07	1.82179e-07	1.49116e-07	1.77651e-07	1.52055e-07	1.5043e-07	1.70284e-07	9.08215e-08	1.8408e-07	maltose phosphorylase [EC:2.4.1.8]
K00692	3.86415e-06	6.54066e-06	4.20116e-06	4.13867e-06	4.37812e-06	4.4527e-06	4.37543e-06	3.79895e-06	5.34166e-06	5.2268e-06	4.15973e-06	5.01177e-06	3.60945e-06	3.92143e-06	4.00342e-06	4.17743e-06	3.83505e-06	levansucrase [EC:2.4.1.10]
K00694	1.04765e-05	1.39001e-05	1.03445e-05	1.34814e-05	1.58366e-05	1.05366e-05	1.43584e-05	1.78035e-05	9.92224e-06	1.26251e-05	1.24959e-05	1.05506e-05	1.05483e-05	1.41554e-05	1.51605e-05	1.00099e-05	1.16356e-05	cellulose synthase (UDP-forming) [EC:2.4.1.12]
K00696	1.90265e-05	1.34371e-05	1.42499e-05	1.75936e-05	1.3009e-05	1.81269e-05	1.44566e-05	1.70364e-05	1.92637e-05	1.62707e-05	1.49739e-05	1.53466e-05	1.44648e-05	1.21126e-05	1.48683e-05	1.45468e-05	1.43134e-05	sucrose-phosphate synthase [EC:2.4.1.14]
K00697	0.000215157	0.000221759	0.00022758	0.000246556	0.000220499	0.000238563	0.000236714	0.000235064	0.000244995	0.000238209	0.00023386	0.000232508	0.000224648	0.000234979	0.000244409	0.000233615	0.000235127	trehalose 6-phosphate synthase [EC:2.4.1.15 2.4.1.347]
K00700	0.000124628	0.000135197	0.000117737	0.000115889	0.000142623	0.000104389	0.000126529	0.000134247	0.000106061	0.000121737	0.000114525	0.000115168	0.000107742	0.000129873	0.000122318	0.000111275	0.000103553	1,4-alpha-glucan branching enzyme [EC:2.4.1.18]
K00701	1.10669e-05	1.57074e-05	1.06361e-05	1.49443e-05	1.30762e-05	1.02722e-05	1.11754e-05	1.36976e-05	1.07311e-05	1.25961e-05	1.16303e-05	1.10552e-05	1.06206e-05	1.17516e-05	1.3366e-05	1.1289e-05	1.29914e-05	cyclomaltodextrin glucanotransferase [EC:2.4.1.19]
K00702	4.37021e-06	7.31146e-06	5.27476e-06	3.99262e-06	4.13676e-06	3.03568e-06	4.53807e-06	4.53724e-06	2.7975e-06	4.37728e-06	5.24154e-06	5.04029e-06	3.12387e-06	4.55509e-06	4.6994e-06	5.2335e-06	2.8395e-06	cellobiose phosphorylase [EC:2.4.1.20]
K00703	0.000100451	9.32754e-05	8.19354e-05	8.25517e-05	0.000100372	8.20331e-05	8.76186e-05	9.01772e-05	8.7866e-05	9.42071e-05	8.93866e-05	9.92853e-05	8.76728e-05	8.92131e-05	8.11121e-05	8.52712e-05	7.76324e-05	starch synthase [EC:2.4.1.21]
K00705	0.000164729	0.000151203	0.000135817	0.000139478	0.000174228	0.000130356	0.00014143	0.000149488	0.000124858	0.000141861	0.000140499	0.000136661	0.000142268	0.000155975	0.000144269	0.000141744	0.000126606	4-alpha-glucanotransferase [EC:2.4.1.25]
K00712	1.2637e-05	1.67896e-05	1.19684e-05	1.24415e-05	2.33922e-05	7.11598e-06	1.30015e-05	1.19295e-05	5.21455e-06	9.44248e-06	9.58067e-06	6.36759e-06	1.42704e-05	2.12713e-05	1.48759e-05	1.21142e-05	1.05716e-05	poly(glycerol-phosphate) alpha-glucosyltransferase [EC:2.4.1.52]
K00720	1.01002e-05	1.03938e-05	8.14623e-06	9.76657e-06	1.00036e-05	9.4221e-06	8.85619e-06	1.10359e-05	1.0194e-05	1.17609e-05	1.06001e-05	1.09051e-05	7.51471e-06	1.06974e-05	9.09019e-06	9.82735e-06	1.47564e-05	ceramide glucosyltransferase [EC:2.4.1.80]
K00721	0.000222977	0.000265893	0.000226114	0.000220454	0.000270147	0.000183103	0.000236683	0.000230718	0.000183042	0.000209749	0.000210203	0.000190044	0.000214834	0.000245914	0.000232807	0.000215399	0.000206174	dolichol-phosphate mannosyltransferase [EC:2.4.1.83]
K00728	4.14365e-05	5.80746e-05	4.43104e-05	4.53662e-05	6.08625e-05	3.07566e-05	5.03845e-05	5.40376e-05	2.53367e-05	4.01488e-05	4.2264e-05	3.06129e-05	3.7891e-05	5.52644e-05	5.38362e-05	4.02598e-05	3.7861e-05	dolichyl-phosphate-mannose-protein mannosyltransferase [EC:2.4.1.109]
K00737	1.3632e-07	1.22093e-07	1.37534e-07	1.60516e-07	1.39351e-07	2.20211e-07	1.75736e-07	1.96991e-07	1.50952e-07	1.82179e-07	1.49116e-07	1.77651e-07	1.52055e-07	1.5043e-07	1.70284e-07	9.08215e-08	1.8408e-07	beta-1,4-mannosyl-glycoprotein beta-1,4-N-acetylglucosaminyltransferase [EC:2.4.1.144]
K00748	0.000149731	0.000137632	0.000150307	0.000152268	0.000127604	0.000164252	0.000146579	0.000144939	0.000170313	0.000157101	0.000152414	0.000162406	0.000151219	0.000134467	0.000143076	0.000151157	0.000157361	lipid-A-disaccharide synthase [EC:2.4.1.182]
K00752	2.47579e-05	2.94033e-05	2.23665e-05	2.45788e-05	3.61282e-05	1.72133e-05	2.54982e-05	2.95866e-05	1.466e-05	2.29382e-05	2.15082e-05	1.72799e-05	2.29922e-05	3.49165e-05	2.86857e-05	2.30957e-05	2.68293e-05	hyaluronan synthase [EC:2.4.1.212]
K00754	0.000149999	0.000190465	0.000163311	0.000174483	0.000158169	0.000163224	0.000178882	0.000181469	0.000143088	0.000170044	0.000189339	0.000160299	0.000152126	0.000158674	0.000189642	0.000168554	0.000158669	L-malate glycosyltransferase [EC:2.4.1.-]
K00756	0.000110799	0.000120004	0.000102961	9.98183e-05	0.000118188	9.51227e-05	0.000107508	0.000110232	9.0731e-05	0.000102081	0.000104946	9.95671e-05	0.000100249	0.0001067	0.000104544	9.87396e-05	9.26886e-05	pyrimidine-nucleoside phosphorylase [EC:2.4.2.2]
K00757	7.41353e-06	1.17944e-05	7.86809e-06	9.32943e-06	7.38223e-06	6.53649e-06	1.14005e-05	1.08096e-05	5.65664e-06	8.58575e-06	1.0069e-05	5.28622e-06	6.45362e-06	6.79581e-06	1.09791e-05	7.29002e-06	7.11818e-06	uridine phosphorylase [EC:2.4.2.3]
K00758	0.000141495	0.000154573	0.000147938	0.000156042	0.000151036	0.000150744	0.00015639	0.000155357	0.000144997	0.000150742	0.000155322	0.000144598	0.000144146	0.000151425	0.000159713	0.000146819	0.000144084	thymidine phosphorylase [EC:2.4.2.4]
K00759	0.000152949	0.000167089	0.000159774	0.000169515	0.000158809	0.000155684	0.000164803	0.000169079	0.000157794	0.000166431	0.000163778	0.000156865	0.000148627	0.00016388	0.000168847	0.000155538	0.000156176	adenine phosphoribosyltransferase [EC:2.4.2.7]
K00760	7.03891e-05	9.70699e-05	7.78182e-05	7.47602e-05	8.48164e-05	6.47226e-05	7.89111e-05	8.11604e-05	6.19405e-05	7.53211e-05	7.40319e-05	6.85286e-05	6.71518e-05	7.93944e-05	7.84402e-05	6.8967e-05	7.57675e-05	hypoxanthine phosphoribosyltransferase [EC:2.4.2.8]
K00761	0.000182713	0.000182896	0.000187114	0.000186667	0.0001783	0.00018567	0.000184049	0.000185043	0.000187142	0.000186056	0.00018621	0.000186295	0.000181651	0.000180044	0.000183409	0.000183318	0.000185934	uracil phosphoribosyltransferase [EC:2.4.2.9]
K00762	0.000223705	0.000233786	0.000242011	0.000256454	0.000221929	0.000252776	0.000248335	0.000244318	0.000253712	0.000249091	0.000248461	0.000240643	0.000235648	0.000234358	0.000253299	0.000241865	0.000248872	orotate phosphoribosyltransferase [EC:2.4.2.10]
K00763	0.000160979	0.000158411	0.000161994	0.000165406	0.00016	0.000166568	0.000164457	0.000165989	0.000166291	0.000162737	0.000163433	0.00016481	0.000165491	0.000162729	0.000166367	0.000163348	0.000158751	nicotinate phosphoribosyltransferase [EC:6.3.4.21]
K00764	0.000184323	0.000185396	0.000187486	0.000188768	0.000180758	0.000189892	0.000186221	0.000185915	0.00019288	0.000190019	0.000186763	0.000189127	0.000183972	0.000181709	0.000185115	0.000185023	0.00018885	amidophosphoribosyltransferase [EC:2.4.2.14]
K00765	0.000166691	0.000173549	0.000174532	0.000173786	0.000169694	0.000172657	0.000173284	0.000171005	0.000174536	0.000175167	0.00017299	0.000174403	0.000170414	0.000170674	0.000172274	0.000171622	0.000176281	ATP phosphoribosyltransferase [EC:2.4.2.17]
K00766	0.000235259	0.000232823	0.000246884	0.000260366	0.000222586	0.000263193	0.000247592	0.000248045	0.00026612	0.00025569	0.000253374	0.000250471	0.000241966	0.000238146	0.00025369	0.000248093	0.000258742	anthranilate phosphoribosyltransferase [EC:2.4.2.18]
K00767	0.000197346	0.000204759	0.00020565	0.000202797	0.000194164	0.000202973	0.000203793	0.000201362	0.000212661	0.000207539	0.000198352	0.000207634	0.000195324	0.000196067	0.000195884	0.000195628	0.000200805	nicotinate-nucleotide pyrophosphorylase (carboxylating) [EC:2.4.2.19]
K00768	0.000281672	0.000275581	0.000291753	0.000289958	0.000284167	0.000291582	0.000292506	0.000284923	0.000298949	0.000290712	0.000287259	0.000294217	0.000293109	0.000292953	0.000287485	0.000289483	0.000290001	nicotinate-nucleotide--dimethylbenzimidazole phosphoribosyltransferase [EC:2.4.2.21]
K00769	1.04901e-05	1.72119e-05	1.49871e-05	1.00567e-05	9.92919e-06	1.01618e-05	1.42339e-05	1.1821e-05	1.69809e-05	1.39685e-05	9.49986e-06	1.63848e-05	9.86296e-06	1.20396e-05	7.72428e-06	8.38151e-06	8.24655e-06	xanthine phosphoribosyltransferase [EC:2.4.2.22]
K00772	3.98663e-05	5.19642e-05	4.05909e-05	4.43508e-05	5.17078e-05	3.71383e-05	4.01334e-05	4.65666e-05	2.92432e-05	3.99334e-05	4.21563e-05	3.43722e-05	4.09252e-05	4.761e-05	4.59811e-05	3.89704e-05	4.8599e-05	5-methylthioadenosine phosphorylase [EC:2.4.2.28]
K00773	0.000147246	0.000134088	0.000145852	0.000150967	0.000127718	0.000157637	0.000143745	0.000142458	0.000171341	0.000155958	0.000146168	0.000160329	0.000146415	0.000135783	0.000139447	0.000147169	0.000151415	queuine tRNA-ribosyltransferase [EC:2.4.2.29]
K00782	0.000153155	0.000128367	0.000115044	0.000118079	0.000150033	0.000111628	0.000119264	0.000130286	0.000104616	0.000127869	0.000128746	0.000126178	0.000126713	0.000134456	0.000123011	0.000128802	0.000122876	L-lactate dehydrogenase complex protein LldG
K00783	0.000149754	0.00013787	0.000150288	0.000152192	0.000129801	0.000165143	0.000144978	0.00014393	0.000172856	0.00015773	0.000151809	0.000164906	0.000151861	0.000136106	0.000141296	0.00015109	0.000157788	23S rRNA (pseudouridine1915-N3)-methyltransferase [EC:2.1.1.177]
K00784	0.000100692	0.000115606	9.58892e-05	9.32137e-05	0.000119389	9.00413e-05	9.66504e-05	0.000104913	7.31341e-05	9.29953e-05	0.000101615	9.19383e-05	9.53064e-05	0.000104165	0.000101464	9.64394e-05	9.4014e-05	ribonuclease Z [EC:3.1.26.11]
K00786	7.03597e-05	6.19519e-05	7.31112e-05	8.31515e-05	7.13324e-05	8.43303e-05	7.61474e-05	7.34145e-05	8.17505e-05	7.89786e-05	8.18284e-05	7.80993e-05	7.66094e-05	7.59243e-05	8.19511e-05	7.97712e-05	7.95651e-05	glycosyltransferase [EC:2.4.-.-]
K00788	0.000236027	0.000248957	0.000233963	0.000232476	0.000249537	0.000228538	0.00023633	0.000231421	0.000235791	0.000240313	0.000231317	0.000242095	0.000234293	0.000243571	0.000232087	0.000234167	0.000230516	thiamine-phosphate pyrophosphorylase [EC:2.5.1.3]
K00789	0.00019905	0.000207159	0.000202315	0.000207123	0.000200426	0.000202811	0.000206849	0.000208902	0.000204599	0.000207071	0.000205153	0.000201917	0.000197215	0.000200007	0.000207325	0.000199759	0.000203733	S-adenosylmethionine synthetase [EC:2.5.1.6]
K00790	0.000243409	0.000239042	0.000243295	0.000237485	0.000238522	0.000236605	0.000241054	0.000241394	0.000241936	0.000240964	0.000234978	0.00023757	0.000239607	0.000239049	0.000236365	0.000238193	0.000244501	UDP-N-acetylglucosamine 1-carboxyvinyltransferase [EC:2.5.1.7]
K00791	0.000225481	0.00021878	0.000216236	0.000219291	0.000220229	0.000222505	0.000216809	0.000217973	0.000224963	0.000225304	0.000220719	0.00022759	0.000218923	0.000215228	0.000216742	0.000220755	0.000219312	tRNA dimethylallyltransferase [EC:2.5.1.75]
K00793	0.000194181	0.000202051	0.000202336	0.000198681	0.000189666	0.000199443	0.000200167	0.000198008	0.000208589	0.000203205	0.000195506	0.000205001	0.000193114	0.00019336	0.000192644	0.000192703	0.000196712	riboflavin synthase [EC:2.5.1.9]
K00794	0.000279498	0.000276986	0.000297558	0.000293782	0.000260047	0.000304662	0.000292736	0.000282402	0.000326271	0.000298471	0.000285354	0.000305989	0.000286461	0.000276429	0.000279249	0.000285713	0.000290154	6,7-dimethyl-8-ribityllumazine synthase [EC:2.5.1.78]
K00795	0.000189443	0.000196644	0.000193971	0.000191825	0.000181986	0.000193595	0.000190249	0.000190337	0.000197586	0.000196713	0.000192724	0.000200163	0.000186754	0.000187507	0.000188591	0.000193252	0.000189371	farnesyl diphosphate synthase [EC:2.5.1.1 2.5.1.10]
K00796	0.000246193	0.000268817	0.000264384	0.000278873	0.00025878	0.000265832	0.000272882	0.000269845	0.000262737	0.000267156	0.000271052	0.000257488	0.000257412	0.000269422	0.000282569	0.000265779	0.000266177	dihydropteroate synthase [EC:2.5.1.15]
K00797	0.000307736	0.000261913	0.000272829	0.000246955	0.000256063	0.000275919	0.000251489	0.000262808	0.000281966	0.000269152	0.000266038	0.000288933	0.000279014	0.000241564	0.000233701	0.00026921	0.000275566	spermidine synthase [EC:2.5.1.16]
K00798	0.000155619	0.000170702	0.000161594	0.000171774	0.000162307	0.00016525	0.000165967	0.000169181	0.000161982	0.0001689	0.000167978	0.00016155	0.000155808	0.000163799	0.00017157	0.000160297	0.000165137	cob(I)alamin adenosyltransferase [EC:2.5.1.17]
K00799	0.00210179	0.00180654	0.00208926	0.00211965	0.00180037	0.00235212	0.00202289	0.0019699	0.00246316	0.00217994	0.00212024	0.00230454	0.00217684	0.00190635	0.00197677	0.00215587	0.00219974	glutathione S-transferase [EC:2.5.1.18]
K00800	0.000228234	0.000238494	0.000238137	0.000234074	0.000223116	0.000233866	0.000232381	0.000238709	0.000236852	0.000240196	0.000233764	0.000236799	0.000222912	0.000224862	0.000227714	0.000223831	0.000245505	3-phosphoshikimate 1-carboxyvinyltransferase [EC:2.5.1.19]
K00801	2.10524e-06	3.01604e-06	1.8788e-06	2.5784e-06	4.07819e-06	2.39942e-06	2.46607e-06	2.70211e-06	2.78984e-06	2.63605e-06	2.68007e-06	3.11213e-06	2.43545e-06	3.41234e-06	2.54735e-06	2.46444e-06	2.46239e-06	farnesyl-diphosphate farnesyltransferase [EC:2.5.1.21]
K00803	0.000124984	0.000152833	0.000148259	0.000143914	0.000138568	0.00014725	0.000142713	0.000142023	0.000138171	0.000142322	0.00014942	0.0001429	0.000132793	0.000144005	0.000146072	0.00013988	0.000144555	alkyldihydroxyacetonephosphate synthase [EC:2.5.1.26]
K00805	5.09673e-05	6.96455e-05	5.27799e-05	5.33074e-05	8.09133e-05	3.46261e-05	5.91431e-05	6.18625e-05	2.7089e-05	4.56634e-05	4.82685e-05	3.39282e-05	4.9808e-05	7.34162e-05	6.52794e-05	4.99745e-05	4.51617e-05	heptaprenyl diphosphate synthase [EC:2.5.1.30]
K00806	0.000230775	0.000249054	0.000235971	0.000236971	0.000253909	0.000221156	0.000239624	0.000239212	0.000217402	0.000230862	0.000230625	0.00021961	0.000229832	0.000248135	0.000243109	0.00023046	0.00022986	undecaprenyl diphosphate synthase [EC:2.5.1.31]
K00808	3.68237e-05	2.58857e-05	2.42248e-05	2.57784e-05	3.3462e-05	2.72441e-05	2.516e-05	2.74312e-05	2.65258e-05	2.91777e-05	2.92595e-05	3.21426e-05	3.08494e-05	2.84573e-05	2.54263e-05	2.99518e-05	2.53889e-05	homospermidine synthase [EC:2.5.1.44]
K00809	6.08231e-06	9.66881e-06	5.87935e-06	6.36927e-06	9.1645e-06	7.57e-06	7.29645e-06	6.28502e-06	8.55599e-06	8.39027e-06	6.88743e-06	9.07778e-06	6.47462e-06	7.7315e-06	7.58528e-06	7.95869e-06	6.80846e-06	deoxyhypusine synthase [EC:2.5.1.46]
K00812	0.000339164	0.000359569	0.000328704	0.000342019	0.000352588	0.000316806	0.000343364	0.00035775	0.000321849	0.000345957	0.000334535	0.00032816	0.000315436	0.000342588	0.000347968	0.000328936	0.000326456	aspartate aminotransferase [EC:2.6.1.1]
K00813	0.000115311	9.85106e-05	0.00011505	0.000115469	9.53139e-05	0.000121995	0.000111906	0.000108645	0.000133293	0.00012089	0.00011546	0.00012666	0.000115896	0.000107718	0.000107304	0.000117146	0.000125272	aspartate aminotransferase [EC:2.6.1.1]
K00817	0.000419296	0.000466529	0.00045479	0.000468508	0.000460501	0.000442011	0.000467964	0.000462366	0.000435023	0.000450827	0.000452427	0.000425714	0.000439933	0.000473152	0.000479639	0.000447434	0.000460528	histidinol-phosphate aminotransferase [EC:2.6.1.9]
K00819	0.000265262	0.000310927	0.000249979	0.00025992	0.000328915	0.000202432	0.000277386	0.000292763	0.000185981	0.000240718	0.000248763	0.000206333	0.000245295	0.000299939	0.000292743	0.00024999	0.000228497	ornithine--oxo-acid transaminase [EC:2.6.1.13]
K00820	0.000347816	0.000377421	0.000337434	0.000345581	0.000392896	0.000315771	0.000345085	0.000350714	0.000306374	0.000333009	0.000329773	0.000318529	0.000343592	0.000377655	0.000354564	0.000335029	0.000328023	glucosamine---fructose-6-phosphate aminotransferase (isomerizing) [EC:2.6.1.16]
K00821	0.000750031	0.000752802	0.000729846	0.000765401	0.000775171	0.000728654	0.000769989	0.000775867	0.000711704	0.000752381	0.000758854	0.000711896	0.000745064	0.000775732	0.000790058	0.000754543	0.000753078	acetylornithine/N-succinyldiaminopimelate aminotransferase [EC:2.6.1.11 2.6.1.17]
K00822	0.000313389	0.000293222	0.000313149	0.000343299	0.000298111	0.000346914	0.000328899	0.000330118	0.000342863	0.000338349	0.00034112	0.000331131	0.00032443	0.000319741	0.000340964	0.000331504	0.000343221	beta-alanine--pyruvate transaminase [EC:2.6.1.18]
K00823	0.000517094	0.000526793	0.000533042	0.000591097	0.000540152	0.000557506	0.000571286	0.000563587	0.00055202	0.00055781	0.000565157	0.000526459	0.00054759	0.00057836	0.000601087	0.000559468	0.000560987	4-aminobutyrate aminotransferase [EC:2.6.1.19]
K00824	0.000156268	0.000122453	0.000137191	0.000146094	0.000138725	0.00015913	0.000139599	0.00013712	0.000164428	0.000150462	0.000148725	0.000160588	0.000153517	0.000137956	0.000140205	0.000153772	0.000145657	D-alanine transaminase [EC:2.6.1.21]
K00826	0.00027683	0.000287799	0.000267901	0.000274529	0.000300757	0.000259256	0.000272916	0.00027647	0.000255592	0.00027081	0.000269612	0.000263299	0.00027075	0.000287649	0.000277495	0.000270298	0.000266373	branched-chain amino acid aminotransferase [EC:2.6.1.42]
K00830	3.95155e-05	4.50722e-05	5.51594e-05	6.5219e-05	4.79581e-05	6.40707e-05	5.93795e-05	5.48525e-05	6.29177e-05	5.77145e-05	6.01984e-05	5.45297e-05	5.24909e-05	5.68658e-05	6.40353e-05	5.64113e-05	6.13083e-05	alanine-glyoxylate transaminase / serine-glyoxylate transaminase / serine-pyruvate transaminase [EC:2.6.1.44 2.6.1.45 2.6.1.51]
K00831	0.000184267	0.000185214	0.00018729	0.000188646	0.000180622	0.000189767	0.000186026	0.000185779	0.000192664	0.000189801	0.000186647	0.000188961	0.000183829	0.00018156	0.000184978	0.000184974	0.000188733	phosphoserine aminotransferase [EC:2.6.1.52]
K00832	0.000224044	0.00017305	0.000204523	0.000197228	0.000177375	0.000224503	0.000191802	0.000192506	0.000237397	0.000212215	0.000205122	0.000228141	0.000214503	0.000181525	0.000180223	0.000207235	0.000213661	aromatic-amino-acid transaminase [EC:2.6.1.57]
K00833	0.000436831	0.000404974	0.000407508	0.000424035	0.000436771	0.000427582	0.000413591	0.000422169	0.000407072	0.000421385	0.000427657	0.000414472	0.000428625	0.00041927	0.000427221	0.000427899	0.000430882	adenosylmethionine---8-amino-7-oxononanoate aminotransferase [EC:2.6.1.62]
K00836	0.00029158	0.00029687	0.000260456	0.000250808	0.000306193	0.000238263	0.000272044	0.000281928	0.000230273	0.00026076	0.00026281	0.000255297	0.000266607	0.000280399	0.000265732	0.000257752	0.000245341	diaminobutyrate-2-oxoglutarate transaminase [EC:2.6.1.76]
K00839	7.29151e-06	7.72057e-06	9.39332e-06	6.82535e-06	1.15144e-05	6.32298e-06	7.65623e-06	7.41984e-06	6.25286e-06	6.94704e-06	7.46942e-06	6.69251e-06	6.40989e-06	8.79281e-06	6.8523e-06	6.48057e-06	7.83729e-06	(S)-ureidoglycine---glyoxylate transaminase [EC:2.6.1.112]
K00840	2.12135e-05	2.69497e-05	2.18229e-05	2.3705e-05	1.70211e-05	1.85722e-05	2.03563e-05	2.43989e-05	1.90973e-05	2.50994e-05	2.33955e-05	2.09681e-05	1.75232e-05	1.89501e-05	2.1924e-05	2.01261e-05	2.60307e-05	succinylornithine aminotransferase [EC:2.6.1.81]
K00841	1.01662e-05	1.71627e-05	1.51119e-05	9.98136e-06	9.68099e-06	9.8082e-06	1.40185e-05	1.18025e-05	1.63512e-05	1.36598e-05	9.23109e-06	1.63656e-05	9.63877e-06	1.21623e-05	7.73416e-06	8.02741e-06	8.17524e-06	aminotransferase [EC:2.6.1.-]
K00845	0.000865847	0.000977267	0.000851168	0.000857076	0.00101292	0.000757715	0.000897659	0.000917297	0.000706395	0.000816669	0.000837707	0.000758079	0.000844019	0.00095808	0.000925568	0.000840787	0.000798404	glucokinase [EC:2.7.1.2]
K00846	1.68214e-07	2.10265e-07	1.39595e-07	9.33992e-08	7.70785e-08	8.60641e-08	1.53888e-07	2.00387e-07	1.81143e-07	1.49622e-07	1.34893e-07	1.68365e-07	1.11469e-07	1.7192e-07	1.29241e-07	1.86366e-07	9.79661e-08	ketohexokinase [EC:2.7.1.3]
K00847	0.000370438	0.000427461	0.000376797	0.000377743	0.000375641	0.000357218	0.00039119	0.000389852	0.000376465	0.000384377	0.000367263	0.000370953	0.000350587	0.000374352	0.000378535	0.000356596	0.000347019	fructokinase [EC:2.7.1.4]
K00848	2.84916e-05	4.15499e-05	2.92267e-05	3.06922e-05	4.17416e-05	1.97423e-05	3.47901e-05	3.61445e-05	1.56761e-05	2.68087e-05	2.88754e-05	2.01639e-05	2.75076e-05	3.93718e-05	3.77403e-05	2.85427e-05	2.43894e-05	rhamnulokinase [EC:2.7.1.5]
K00849	7.16886e-05	9.12819e-05	7.43945e-05	6.97396e-05	8.22028e-05	6.30523e-05	7.32897e-05	7.65595e-05	5.32233e-05	6.66351e-05	7.4691e-05	6.37258e-05	6.45658e-05	7.55955e-05	7.66316e-05	7.11185e-05	6.27247e-05	galactokinase [EC:2.7.1.6]
K00850	5.08088e-05	6.96172e-05	5.36998e-05	5.34419e-05	8.17057e-05	3.60014e-05	5.85559e-05	5.94632e-05	3.03777e-05	4.65953e-05	4.98574e-05	3.68975e-05	5.07916e-05	7.28231e-05	6.35405e-05	5.07435e-05	4.60185e-05	6-phosphofructokinase 1 [EC:2.7.1.11]
K00851	0.000173825	0.000169219	0.000176073	0.000174591	0.000173399	0.000177933	0.000176399	0.000177386	0.000178374	0.000176445	0.000175201	0.000176446	0.000173627	0.000174385	0.000175236	0.000174314	0.000175936	gluconokinase [EC:2.7.1.12]
K00852	0.000223395	0.000247745	0.000208977	0.000211948	0.000262347	0.00017691	0.000219964	0.00023	0.000178317	0.000204836	0.000196023	0.000187888	0.000207951	0.000243272	0.000222927	0.000204098	0.000192484	ribokinase [EC:2.7.1.15]
K00853	2.28882e-05	3.75453e-05	2.92138e-05	2.46518e-05	2.24404e-05	2.0329e-05	3.12365e-05	2.83478e-05	2.581e-05	2.78291e-05	2.57446e-05	2.74743e-05	1.99694e-05	2.46022e-05	2.47329e-05	2.13783e-05	1.92817e-05	L-ribulokinase [EC:2.7.1.16]
K00854	0.000221922	0.0002476	0.000214312	0.00020038	0.000266225	0.000176085	0.000216636	0.000216133	0.00017469	0.000199276	0.000190757	0.000190789	0.000216975	0.000254546	0.000210817	0.000200168	0.000192143	xylulokinase [EC:2.7.1.17]
K00855	4.30423e-05	3.09993e-05	3.3915e-05	3.10422e-05	4.27832e-05	3.29853e-05	3.21484e-05	3.31987e-05	3.21147e-05	3.54644e-05	3.53608e-05	3.72364e-05	3.56562e-05	3.44399e-05	3.05675e-05	3.47926e-05	3.27268e-05	phosphoribulokinase [EC:2.7.1.19]
K00856	0.000154632	0.00015974	0.000162781	0.000162071	0.000163394	0.0001619	0.000159765	0.000156078	0.000164605	0.000161171	0.000158689	0.000164954	0.000161002	0.000161745	0.00016008	0.000161284	0.000160837	adenosine kinase [EC:2.7.1.20]
K00857	7.99096e-05	0.000101493	8.43651e-05	8.31663e-05	9.1347e-05	7.31383e-05	8.46864e-05	8.86097e-05	7.13486e-05	7.95654e-05	7.89599e-05	7.4048e-05	7.44191e-05	8.39153e-05	8.35258e-05	7.39544e-05	7.50734e-05	thymidine kinase [EC:2.7.1.21]
K00858	0.000204407	0.000225821	0.000212082	0.000212532	0.000234886	0.000195912	0.000215226	0.000216377	0.000192202	0.000207331	0.000206324	0.000199286	0.000209431	0.000231241	0.000221425	0.000209105	0.000208445	NAD+ kinase [EC:2.7.1.23]
K00859	0.0002189	0.000248695	0.000233284	0.000228043	0.000236539	0.000216597	0.000230503	0.000231284	0.00020744	0.00022474	0.000230006	0.000219719	0.000219491	0.000232487	0.000234507	0.000226267	0.000226325	dephospho-CoA kinase [EC:2.7.1.24]
K00860	0.000185501	0.000176308	0.000185261	0.000153369	0.000168688	0.0001707	0.000163302	0.000158489	0.000181632	0.00016354	0.000159907	0.000184992	0.00017945	0.000157396	0.000144703	0.000173267	0.00016794	adenylylsulfate kinase [EC:2.7.1.25]
K00862	1.29401e-05	1.80017e-05	1.31828e-05	1.32936e-05	2.31661e-05	7.65222e-06	1.4401e-05	1.37664e-05	5.65562e-06	1.01896e-05	1.00761e-05	7.78411e-06	1.46968e-05	2.24574e-05	1.57546e-05	1.23048e-05	1.11064e-05	erythritol kinase (D-erythritol 1-phosphate-forming) [EC:2.7.1.215]
K00863	5.2937e-05	7.78982e-05	5.75608e-05	5.73848e-05	7.6768e-05	3.93517e-05	6.64764e-05	6.45957e-05	3.99829e-05	5.30888e-05	5.06096e-05	4.32897e-05	5.34351e-05	7.46557e-05	6.46119e-05	4.94104e-05	4.68379e-05	triose/dihydroxyacetone kinase / FAD-AMP lyase (cyclizing) [EC:2.7.1.28 2.7.1.29 4.6.1.15]
K00864	0.00027305	0.000313096	0.00027993	0.0002755	0.000321112	0.00024958	0.000285649	0.000286573	0.000247777	0.00027047	0.000266424	0.00026124	0.000273446	0.000316228	0.000289979	0.000273659	0.000260074	glycerol kinase [EC:2.7.1.30]
K00865	6.31947e-05	8.85697e-05	6.84989e-05	6.55509e-05	7.46013e-05	4.79754e-05	7.32478e-05	7.63052e-05	4.17383e-05	6.39284e-05	6.91784e-05	5.21567e-05	5.35305e-05	7.23371e-05	7.5814e-05	6.34045e-05	5.94444e-05	glycerate 2-kinase [EC:2.7.1.165]
K00867	3.34049e-05	4.56405e-05	3.87559e-05	3.3334e-05	5.00307e-05	2.55937e-05	3.94774e-05	3.84127e-05	2.86989e-05	3.3162e-05	2.92275e-05	2.99279e-05	3.26796e-05	4.61418e-05	3.58474e-05	3.00913e-05	2.95586e-05	type I pantothenate kinase [EC:2.7.1.33]
K00868	5.33064e-05	4.91618e-05	4.4091e-05	4.43699e-05	5.45112e-05	4.16204e-05	4.33825e-05	4.5634e-05	4.04081e-05	4.69579e-05	4.70173e-05	4.76394e-05	4.36911e-05	4.53161e-05	4.39636e-05	4.71803e-05	4.17482e-05	pyridoxine kinase [EC:2.7.1.35]
K00869	2.7504e-06	3.75524e-06	2.6716e-06	3.58075e-06	4.73902e-06	2.99305e-06	3.75831e-06	4.03746e-06	3.11616e-06	3.22935e-06	3.2123e-06	3.51124e-06	2.81387e-06	3.84377e-06	3.33982e-06	2.80094e-06	3.12054e-06	mevalonate kinase [EC:2.7.1.36]
K00872	4.93314e-05	6.76957e-05	5.11761e-05	5.67876e-05	6.94611e-05	3.68324e-05	5.75046e-05	6.40388e-05	3.10912e-05	4.80821e-05	4.94482e-05	3.60667e-05	4.50583e-05	6.18822e-05	6.41803e-05	4.82856e-05	4.76231e-05	homoserine kinase [EC:2.7.1.39]
K00873	0.000206052	0.000211042	0.000207536	0.000209546	0.000212025	0.000203814	0.000207994	0.000211138	0.000204137	0.000209323	0.000205254	0.000202996	0.000204209	0.000212441	0.000210055	0.000204893	0.000212514	pyruvate kinase [EC:2.7.1.40]
K00874	0.000118113	0.000142937	0.000113831	0.000120587	0.000122999	0.000103149	0.000127126	0.000138623	0.000106528	0.000120933	0.000114085	0.000106246	0.000100433	0.000120707	0.00012713	0.000106897	0.000105833	2-dehydro-3-deoxygluconokinase [EC:2.7.1.45]
K00875	1.05167e-05	1.72235e-05	1.50142e-05	1.00635e-05	9.96555e-06	1.01538e-05	1.42377e-05	1.18259e-05	1.69836e-05	1.39717e-05	9.48518e-06	1.63891e-05	9.86628e-06	1.20424e-05	7.73272e-06	8.39822e-06	8.26055e-06	D-ribulokinase [EC:2.7.1.47]
K00876	8.7171e-05	9.9472e-05	8.97161e-05	7.81389e-05	9.85745e-05	7.65136e-05	9.01539e-05	8.91046e-05	7.10705e-05	7.98466e-05	8.45767e-05	7.8836e-05	8.50268e-05	8.90957e-05	8.8248e-05	8.66126e-05	8.10554e-05	uridine kinase [EC:2.7.1.48]
K00878	1.1998e-05	1.59636e-05	1.12614e-05	1.15805e-05	2.23755e-05	6.48888e-06	1.21585e-05	1.11157e-05	4.70753e-06	8.69464e-06	8.91558e-06	5.98088e-06	1.37808e-05	2.06068e-05	1.4119e-05	1.1615e-05	9.85631e-06	hydroxyethylthiazole kinase [EC:2.7.1.50]
K00880	5.60776e-07	1.14856e-06	1.01295e-06	7.36677e-07	5.23709e-07	6.10833e-07	9.49281e-07	1.11996e-06	7.71632e-07	8.45261e-07	7.3279e-07	1.09649e-06	6.19938e-07	1.11699e-06	7.56345e-07	5.24903e-07	6.9607e-07	L-xylulokinase [EC:2.7.1.53]
K00882	0.000107449	0.000111614	0.000104417	9.66464e-05	0.000116945	8.64945e-05	0.000106467	0.000103972	8.63691e-05	9.44184e-05	9.43157e-05	8.6477e-05	9.90943e-05	0.000109482	0.000102673	9.83924e-05	9.06789e-05	1-phosphofructokinase [EC:2.7.1.56]
K00883	7.70646e-05	6.96922e-05	7.49093e-05	6.21557e-05	5.63163e-05	7.72166e-05	6.54455e-05	6.40464e-05	8.62615e-05	7.35835e-05	6.56175e-05	8.19848e-05	7.15226e-05	5.71128e-05	5.40118e-05	6.78681e-05	7.46257e-05	2-dehydro-3-deoxygalactonokinase [EC:2.7.1.58]
K00884	1.74338e-05	2.66029e-05	2.16563e-05	1.95694e-05	1.66026e-05	1.73012e-05	2.07746e-05	2.05199e-05	2.37163e-05	2.16268e-05	1.73151e-05	2.28715e-05	1.68191e-05	1.82397e-05	1.58438e-05	1.47467e-05	1.67074e-05	N-acetylglucosamine kinase [EC:2.7.1.59]
K00885	2.09087e-05	2.80368e-05	1.97155e-05	2.19724e-05	3.74114e-05	1.32275e-05	2.40822e-05	2.88071e-05	9.64026e-06	1.81807e-05	1.77522e-05	1.31338e-05	2.16577e-05	3.47408e-05	2.90068e-05	2.02956e-05	1.83738e-05	N-acylmannosamine kinase [EC:2.7.1.60]
K00886	3.50563e-05	4.80658e-05	3.77655e-05	3.73613e-05	5.13556e-05	2.53212e-05	4.18049e-05	4.23615e-05	2.06794e-05	3.33763e-05	3.57765e-05	2.48976e-05	3.28715e-05	4.62315e-05	4.44057e-05	3.41349e-05	3.1701e-05	polyphosphate glucokinase [EC:2.7.1.63]
K00887	2.64023e-06	4.04796e-06	4.73623e-06	1.43296e-06	2.30909e-06	7.73028e-06	1.45949e-06	1.74801e-06	1.76573e-06	1.987e-06	5.80118e-06	4.78548e-06	5.73321e-06	5.07944e-07	2.03577e-06	4.11876e-06	6.57111e-06	undecaprenol kinase [EC:2.7.1.66]
K00891	0.000184712	0.000203319	0.000198511	0.000192261	0.000189161	0.000193329	0.000194415	0.000192728	0.000188658	0.000194491	0.000198566	0.000197321	0.000189157	0.000188985	0.000193431	0.000192914	0.000196138	shikimate kinase [EC:2.7.1.71]
K00895	6.72983e-07	1.06772e-06	8.27633e-07	8.78561e-07	9.00937e-07	7.0225e-07	9.78797e-07	9.35281e-07	7.94386e-07	9.26307e-07	7.53437e-07	6.46207e-07	6.21653e-07	8.52272e-07	8.47491e-07	6.22309e-07	8.12381e-07	diphosphate-dependent phosphofructokinase [EC:2.7.1.90]
K00897	2.50244e-05	2.38763e-05	2.10967e-05	2.43958e-05	1.80516e-05	2.37461e-05	2.44431e-05	2.60057e-05	2.38532e-05	2.34952e-05	2.38134e-05	2.03548e-05	1.99611e-05	1.81088e-05	2.38597e-05	2.0616e-05	1.96951e-05	kanamycin kinase [EC:2.7.1.95]
K00899	1.03029e-06	1.47487e-06	1.13208e-06	1.20026e-06	1.18753e-06	1.16557e-06	1.38557e-06	1.4446e-06	1.34529e-06	1.48514e-06	1.18516e-06	1.0978e-06	9.7964e-07	1.26644e-06	1.06617e-06	1.04077e-06	1.09685e-06	5-methylthioribose kinase [EC:2.7.1.100]
K00901	0.000127364	0.000102747	0.000135217	0.000127984	9.71768e-05	0.000152169	0.00012001	0.000116952	0.000152917	0.000129094	0.000130559	0.000139412	0.00013846	0.000106155	0.000116214	0.000134069	0.000147282	diacylglycerol kinase (ATP) [EC:2.7.1.107]
K00903	5.34348e-07	8.33703e-07	3.40153e-07	8.54616e-07	9.94509e-07	5.25274e-07	7.33818e-07	7.9051e-07	3.07454e-07	5.48615e-07	5.96177e-07	3.85181e-07	2.94106e-07	5.05014e-07	9.7695e-07	8.75974e-07	6.05196e-07	protein-tyrosine kinase [EC:2.7.10.2]
K00906	0.00010231	7.39197e-05	8.49717e-05	7.76242e-05	7.94095e-05	9.3939e-05	7.52879e-05	8.07792e-05	9.47067e-05	8.7485e-05	8.52052e-05	9.62363e-05	9.18261e-05	7.27238e-05	6.98875e-05	8.70454e-05	9.16216e-05	isocitrate dehydrogenase kinase/phosphatase [EC:2.7.11.5 3.1.3.-]
K00912	0.000135748	0.000114791	0.000131669	0.000137663	0.000114247	0.000151166	0.000126991	0.000127981	0.000151203	0.000139358	0.000138141	0.000143885	0.000138413	0.000119384	0.000129805	0.00013931	0.000145721	tetraacyldisaccharide 4-kinase [EC:2.7.1.130]
K00917	3.32131e-05	4.59745e-05	3.26737e-05	3.33751e-05	5.71298e-05	1.99505e-05	3.582e-05	3.66675e-05	1.48999e-05	2.71436e-05	2.80607e-05	2.10376e-05	3.48866e-05	5.34205e-05	4.14035e-05	3.30499e-05	2.74751e-05	tagatose 6-phosphate kinase [EC:2.7.1.144]
K00918	5.91577e-09	1.13408e-08	1.59033e-08	1.87857e-08	2.67815e-08	1.73744e-08	2.80907e-08	2.10576e-08	7.99159e-09	1.82872e-08	2.78732e-08	1.62309e-08	7.54558e-09	1.87549e-08	1.0479e-08	3.26958e-09	1.43734e-08	ADP-dependent phosphofructokinase/glucokinase [EC:2.7.1.146 2.7.1.147]
K00919	0.000165214	0.000171274	0.000173289	0.000171746	0.000166284	0.000170901	0.000171577	0.000169108	0.000172555	0.000173474	0.000170882	0.000171883	0.000168441	0.000167845	0.000170178	0.000169719	0.000174252	4-diphosphocytidyl-2-C-methyl-D-erythritol kinase [EC:2.7.1.148]
K00925	0.000190742	0.000171632	0.000185725	0.000183741	0.000172627	0.000188112	0.000187652	0.000182497	0.000201646	0.000187475	0.000182833	0.000190863	0.000190731	0.000179763	0.000178676	0.000185278	0.00018522	acetate kinase [EC:2.7.2.1]
K00926	7.39736e-05	7.00729e-05	8.33644e-05	8.88198e-05	7.97109e-05	8.86774e-05	8.49724e-05	7.98133e-05	9.01673e-05	8.09601e-05	8.25041e-05	8.01789e-05	8.96813e-05	8.86862e-05	8.95286e-05	8.75429e-05	8.7653e-05	carbamate kinase [EC:2.7.2.2]
K00927	0.000194993	0.000197902	0.00020009	0.00019962	0.000193311	0.000198675	0.000197858	0.000197247	0.000200703	0.000199977	0.000197943	0.000196601	0.000192747	0.000191585	0.000196262	0.00019441	0.000199568	phosphoglycerate kinase [EC:2.7.2.3]
K00928	0.00020129	0.000213657	0.000209528	0.00020224	0.000199085	0.000207515	0.000207605	0.00020287	0.000217846	0.00021208	0.000204195	0.000216432	0.000199624	0.000202122	0.000199237	0.000202499	0.000201329	aspartate kinase [EC:2.7.2.4]
K00930	0.000182076	0.000179162	0.00018764	0.000182741	0.000180577	0.00018668	0.000183801	0.000181288	0.000189396	0.000185463	0.000183849	0.000185408	0.000181097	0.000179553	0.000180548	0.000181975	0.000185493	acetylglutamate kinase [EC:2.7.2.8]
K00931	0.000167197	0.00017553	0.000175181	0.000174989	0.00017056	0.000174398	0.000174863	0.000171918	0.000176027	0.000176918	0.000174269	0.000175822	0.000171229	0.000171751	0.000172576	0.000171873	0.000176681	glutamate 5-kinase [EC:2.7.2.11]
K00932	5.31037e-06	3.45474e-06	3.92789e-06	3.66718e-06	7.65069e-07	4.01077e-06	3.12254e-06	4.76981e-06	4.18254e-06	5.84566e-06	4.52638e-06	4.19671e-06	2.21266e-06	3.25036e-06	2.95487e-06	3.96368e-06	9.12711e-06	propionate kinase [EC:2.7.2.15]
K00933	4.11532e-08	6.28343e-08	5.43362e-08	5.02715e-08	5.77e-08	3.87221e-08	5.19066e-08	8.09473e-08	3.38533e-08	4.8835e-08	3.81393e-08	4.82485e-08	3.02967e-08	5.20969e-08	4.43903e-08	5.72176e-08	3.59335e-08	creatine kinase [EC:2.7.3.2]
K00936	0.000159622	0.000154072	0.000160097	0.000160484	0.000158408	0.000161443	0.000163187	0.00015688	0.000168863	0.00016121	0.000157331	0.000162729	0.000159606	0.000160723	0.000159976	0.000160835	0.000153568	two-component system, sensor histidine kinase PdtaS [EC:2.7.13.3]
K00937	0.000185108	0.000186651	0.000188141	0.000190099	0.000181975	0.000190913	0.000187234	0.000186973	0.000193667	0.000191462	0.000187884	0.000189975	0.000185087	0.000182735	0.000186393	0.000185985	0.000189972	polyphosphate kinase [EC:2.7.4.1]
K00938	2.62759e-06	3.67555e-06	2.53886e-06	3.46896e-06	4.59287e-06	2.94052e-06	3.6316e-06	3.94363e-06	3.09674e-06	3.16337e-06	3.15552e-06	3.49428e-06	2.78643e-06	3.81398e-06	3.27542e-06	2.75326e-06	3.05671e-06	phosphomevalonate kinase [EC:2.7.4.2]
K00939	0.00019634	0.000203141	0.000199557	0.000203738	0.000195667	0.000199943	0.000203903	0.000205779	0.000200992	0.000203401	0.00020149	0.000197799	0.000194381	0.000195419	0.000203852	0.000196703	0.000200491	adenylate kinase [EC:2.7.4.3]
K00940	0.000188634	0.000192548	0.000192622	0.000192652	0.000184755	0.000192835	0.000190571	0.000190327	0.000195523	0.000194217	0.000191877	0.000194013	0.000187036	0.000186116	0.000189695	0.000190214	0.0001916	nucleoside-diphosphate kinase [EC:2.7.4.6]
K00941	0.000279454	0.000272329	0.000288566	0.000286761	0.000280401	0.000294866	0.00028242	0.000275004	0.000292338	0.000285639	0.000288378	0.000292236	0.000293317	0.000284725	0.000284526	0.000292999	0.000293614	hydroxymethylpyrimidine/phosphomethylpyrimidine kinase [EC:2.7.1.49 2.7.4.7]
K00942	0.000220587	0.000234233	0.000221901	0.000226847	0.000244242	0.000212929	0.000225947	0.000230226	0.00020977	0.00022046	0.000216598	0.0002115	0.000222042	0.000240456	0.000232289	0.000220493	0.000220689	guanylate kinase [EC:2.7.4.8]
K00943	0.000302781	0.000325916	0.000313828	0.00032719	0.000301548	0.000311844	0.000327336	0.000326141	0.0003069	0.00032112	0.00033006	0.000309373	0.000299877	0.000307611	0.000333526	0.00031549	0.000309072	dTMP kinase [EC:2.7.4.9]
K00945	0.000209886	0.000220063	0.00021732	0.000216891	0.000212441	0.000211803	0.000219048	0.000220214	0.000212562	0.000218131	0.000215671	0.000211036	0.000204441	0.000209959	0.000217261	0.000209691	0.00021381	CMP/dCMP kinase [EC:2.7.4.25]
K00946	0.000173797	0.000168092	0.000172402	0.000178721	0.000170832	0.000179718	0.000171919	0.000174101	0.000175743	0.000175925	0.00017723	0.000172654	0.000174106	0.000169567	0.00017741	0.000176645	0.000180585	thiamine-monophosphate kinase [EC:2.7.4.16]
K00948	0.000226668	0.000253733	0.0002564	0.000262354	0.000235143	0.000256738	0.000262397	0.000253445	0.000263907	0.000260732	0.000256829	0.00025652	0.000240664	0.000248765	0.000259251	0.000247893	0.000254779	ribose-phosphate pyrophosphokinase [EC:2.7.6.1]
K00949	1.09939e-05	1.77766e-05	1.55209e-05	1.08382e-05	1.0562e-05	1.06188e-05	1.49128e-05	1.24073e-05	1.73921e-05	1.45597e-05	1.01085e-05	1.67309e-05	1.00992e-05	1.25124e-05	8.4589e-06	8.79089e-06	8.78981e-06	thiamine pyrophosphokinase [EC:2.7.6.2]
K00950	0.000199618	0.000202536	0.000201404	0.000206513	0.000191211	0.00020349	0.0001993	0.000203238	0.000206467	0.000207367	0.000202385	0.000202539	0.000196211	0.00019399	0.000200231	0.00019859	0.000210079	2-amino-4-hydroxy-6-hydroxymethyldihydropteridine diphosphokinase [EC:2.7.6.3]
K00951	0.000387821	0.000356429	0.000378382	0.000383879	0.000359596	0.000395824	0.000373253	0.000375415	0.000401074	0.000383231	0.000378634	0.000385548	0.000385693	0.000361684	0.000372149	0.000382175	0.000390288	GTP pyrophosphokinase [EC:2.7.6.5]
K00952	6.47187e-05	3.94728e-05	4.91024e-05	4.18527e-05	5.12235e-05	5.09825e-05	4.41498e-05	4.31034e-05	5.62466e-05	4.90632e-05	4.7109e-05	5.87464e-05	5.82828e-05	4.5418e-05	3.8243e-05	5.39048e-05	4.83877e-05	nicotinamide-nucleotide adenylyltransferase [EC:2.7.7.1]
K00954	0.000176323	0.000187371	0.000185939	0.000183577	0.000184189	0.000186549	0.00018366	0.000184738	0.000182102	0.000185167	0.000186539	0.000186515	0.000182786	0.000182417	0.000184931	0.000182983	0.000190119	pantetheine-phosphate adenylyltransferase [EC:2.7.7.3]
K00955	0.000294994	0.000276321	0.000297929	0.000272213	0.000269999	0.000290386	0.00027683	0.000272647	0.000298648	0.000281712	0.000281311	0.000296934	0.000286009	0.000264301	0.00026234	0.00028641	0.000284623	bifunctional enzyme CysN/CysC [EC:2.7.7.4 2.7.1.25]
K00956	0.000200388	0.000210809	0.000206551	0.000206164	0.000196198	0.000202453	0.000204401	0.000205234	0.000204217	0.000206716	0.000206312	0.000206802	0.000196526	0.000197817	0.000203661	0.000202916	0.000201452	sulfate adenylyltransferase subunit 1 [EC:2.7.7.4]
K00957	0.000202043	0.000212896	0.000208481	0.000208929	0.000198087	0.000205157	0.000206759	0.000207728	0.000206709	0.000209897	0.000209467	0.000209012	0.000199335	0.000199664	0.00020612	0.000204328	0.000203977	sulfate adenylyltransferase subunit 2 [EC:2.7.7.4]
K00958	8.83398e-05	5.68737e-05	7.94532e-05	6.64882e-05	6.73323e-05	7.73794e-05	6.87636e-05	6.55727e-05	9.03762e-05	6.97601e-05	6.46598e-05	7.99915e-05	8.07466e-05	6.06621e-05	5.63906e-05	7.54294e-05	7.57376e-05	sulfate adenylyltransferase [EC:2.7.7.4]
K00962	0.000184649	0.000185877	0.000188018	0.000189537	0.000181047	0.000190426	0.000187168	0.000186996	0.000193151	0.000190433	0.000187115	0.00018939	0.000184418	0.000181964	0.000185747	0.000185218	0.000189383	polyribonucleotide nucleotidyltransferase [EC:2.7.7.8]
K00963	0.000225474	0.000216849	0.000215351	0.00021918	0.000222083	0.000219957	0.000216517	0.000221449	0.000221256	0.000223196	0.000220103	0.000224183	0.000218622	0.000216805	0.00021776	0.000219332	0.00021823	UTP--glucose-1-phosphate uridylyltransferase [EC:2.7.7.9]
K00965	5.95905e-05	7.06857e-05	5.94359e-05	5.86667e-05	7.1977e-05	5.51853e-05	6.06447e-05	6.4055e-05	4.67427e-05	5.48335e-05	6.0429e-05	5.0915e-05	5.67637e-05	6.41692e-05	6.33431e-05	5.6485e-05	5.53268e-05	UDPglucose--hexose-1-phosphate uridylyltransferase [EC:2.7.7.12]
K00966	0.000131538	0.000149385	0.00012917	0.000119312	0.000156086	0.000109099	0.00013055	0.0001322	0.000107941	0.000117358	0.00011559	0.000115139	0.000129275	0.00014775	0.000129497	0.0001237	0.000113861	mannose-1-phosphate guanylyltransferase [EC:2.7.7.13]
K00968	5.55793e-06	5.12751e-06	7.61855e-06	4.88064e-06	8.03364e-06	4.27037e-06	5.49905e-06	4.90991e-06	3.78047e-06	4.64192e-06	5.27268e-06	3.47177e-06	4.33785e-06	5.49703e-06	4.81544e-06	4.57945e-06	5.88411e-06	choline-phosphate cytidylyltransferase [EC:2.7.7.15]
K00969	0.000183905	0.000185076	0.000185946	0.000188258	0.000180401	0.000189263	0.000185744	0.00018447	0.00019221	0.000188832	0.00018634	0.000188505	0.000183649	0.000181222	0.000184392	0.000184446	0.000188472	nicotinate-nucleotide adenylyltransferase [EC:2.7.7.18]
K00970	0.000191608	0.000195876	0.000194881	0.000198036	0.000189757	0.000197145	0.000193458	0.000194702	0.000200414	0.000198103	0.000195025	0.000197362	0.000191123	0.000189898	0.000193352	0.000192391	0.000197332	poly(A) polymerase [EC:2.7.7.19]
K00971	0.000239	0.000203255	0.000228114	0.000216023	0.000209321	0.000244117	0.00021196	0.000209978	0.00025055	0.000231756	0.000227673	0.000247442	0.000233582	0.000203606	0.000201865	0.000228495	0.000240894	mannose-1-phosphate guanylyltransferase [EC:2.7.7.13]
K00972	5.3692e-07	8.68186e-07	4.13927e-07	8.87028e-07	1.01737e-06	5.75781e-07	7.6944e-07	8.21927e-07	3.76826e-07	6.05762e-07	6.12522e-07	4.12434e-07	3.84139e-07	5.2455e-07	1.00533e-06	8.8551e-07	6.46803e-07	UDP-N-acetylglucosamine/UDP-N-acetylgalactosamine diphosphorylase [EC:2.7.7.23 2.7.7.83]
K00973	0.000197442	0.000203604	0.000200984	0.000201869	0.000203035	0.00020108	0.000196703	0.000196036	0.000189794	0.000196247	0.00020421	0.000196426	0.000200819	0.000199539	0.000203423	0.000203154	0.000205207	glucose-1-phosphate thymidylyltransferase [EC:2.7.7.24]
K00974	0.000163726	0.000149252	0.000162172	0.000166883	0.000157141	0.000175752	0.000153069	0.000156319	0.000167756	0.000161821	0.000166429	0.000164821	0.000169635	0.000154979	0.000159415	0.000165901	0.000177384	tRNA nucleotidyltransferase (CCA-adding enzyme) [EC:2.7.7.72 3.1.3.- 3.1.4.-]
K00975	0.000103414	0.000120082	0.00010093	9.62974e-05	0.000123879	8.71293e-05	0.000106809	0.000113832	8.08904e-05	9.96721e-05	0.000100409	9.47971e-05	9.56682e-05	0.00011105	0.000105916	9.45054e-05	9.10736e-05	glucose-1-phosphate adenylyltransferase [EC:2.7.7.27]
K00978	9.60975e-05	6.73997e-05	8.01609e-05	6.96334e-05	8.06322e-05	8.5932e-05	7.12959e-05	7.52206e-05	8.49473e-05	7.73455e-05	7.84738e-05	8.74212e-05	8.80042e-05	7.05468e-05	6.65064e-05	8.11378e-05	7.91623e-05	glucose-1-phosphate cytidylyltransferase [EC:2.7.7.33]
K00979	0.000143402	0.000126651	0.00013886	0.000147369	0.000127896	0.000159884	0.00013588	0.000137395	0.00016127	0.000148776	0.000147825	0.000154758	0.000146897	0.000130972	0.000138591	0.000147825	0.000154482	3-deoxy-manno-octulosonate cytidylyltransferase (CMP-KDO synthetase) [EC:2.7.7.38]
K00980	5.10725e-05	4.28809e-05	4.95116e-05	3.96527e-05	5.81178e-05	3.92826e-05	4.45274e-05	4.21694e-05	4.20654e-05	3.96455e-05	3.8574e-05	4.10158e-05	5.06943e-05	5.13039e-05	4.13632e-05	4.65122e-05	4.46227e-05	glycerol-3-phosphate cytidylyltransferase [EC:2.7.7.39]
K00981	0.000355689	0.000323767	0.000352855	0.000348724	0.000339139	0.00036584	0.000341748	0.000338088	0.000370628	0.000349425	0.000347562	0.000358267	0.000361465	0.000338701	0.000338819	0.000354161	0.000358123	phosphatidate cytidylyltransferase [EC:2.7.7.41]
K00982	0.000184391	0.000185735	0.00018771	0.000188887	0.000180621	0.000189929	0.000186412	0.000186213	0.000192789	0.000190029	0.000186846	0.000189516	0.000183966	0.000182033	0.00018526	0.000185003	0.000188966	[glutamine synthetase] adenylyltransferase / [glutamine synthetase]-adenylyl-L-tyrosine phosphorylase [EC:2.7.7.42 2.7.7.89]
K00983	8.75722e-05	8.41567e-05	7.44242e-05	7.48275e-05	9.27907e-05	7.34368e-05	7.85415e-05	8.15607e-05	7.83833e-05	8.09336e-05	7.32644e-05	8.14685e-05	7.8527e-05	8.59482e-05	7.44098e-05	7.41357e-05	6.79878e-05	N-acylneuraminate cytidylyltransferase [EC:2.7.7.43]
K00984	4.58211e-05	4.49186e-05	5.42986e-05	6.87122e-05	4.0835e-05	6.92846e-05	5.90788e-05	5.73721e-05	6.86411e-05	5.95103e-05	6.19053e-05	5.71424e-05	5.55937e-05	5.38004e-05	6.58381e-05	5.89993e-05	6.0893e-05	streptomycin 3\-adenylyltransferase [EC:2.7.7.47]
K00986	0.000155181	0.000155568	0.000152458	0.000130336	0.000179017	0.0001598	0.000135566	0.000132096	0.000142387	0.000132144	0.000146423	0.000153624	0.000173846	0.000155898	0.00013061	0.000152287	0.000157677	RNA-directed DNA polymerase [EC:2.7.7.49]
K00989	0.000184227	0.000185199	0.00018728	0.000188627	0.000180611	0.000189775	0.000186003	0.000185742	0.000192664	0.00018977	0.000186623	0.000188963	0.000183896	0.000181499	0.000184972	0.000184939	0.000188756	ribonuclease PH [EC:2.7.7.56]
K00990	0.000184267	0.000185318	0.000187316	0.000188715	0.000180752	0.000189902	0.000186062	0.000185822	0.000192775	0.000189874	0.000186686	0.000189	0.000183947	0.000181549	0.000185044	0.000184992	0.000188818	[protein-PII] uridylyltransferase [EC:2.7.7.59]
K00991	0.000180959	0.000179586	0.000183898	0.000184327	0.000175676	0.000186058	0.000182332	0.000181997	0.000188254	0.000185779	0.000182573	0.000184312	0.000180427	0.000176984	0.000181715	0.000181521	0.000185305	2-C-methyl-D-erythritol 4-phosphate cytidylyltransferase [EC:2.7.7.60]
K00992	0.000169529	0.000154879	0.000166065	0.000170328	0.000142287	0.000178696	0.000162545	0.000162069	0.000193454	0.000176545	0.000166544	0.000181317	0.000163388	0.000150676	0.00015814	0.000166384	0.000167704	N-acetyl-alpha-D-muramate 1-phosphate uridylyltransferase [EC:2.7.7.99]
K00995	0.000288243	0.000303357	0.000292725	0.000286665	0.000306007	0.00027236	0.000293097	0.000289465	0.0002732	0.000283138	0.000283042	0.000273319	0.000283384	0.00029447	0.000290803	0.000284251	0.000282902	CDP-diacylglycerol---glycerol-3-phosphate 3-phosphatidyltransferase [EC:2.7.8.5]
K00996	0.00011609	0.000131667	0.000142635	0.000128275	0.000118364	0.000138685	0.000135604	0.000124607	0.000150076	0.000136687	0.000128185	0.000142589	0.000125368	0.00012371	0.000125509	0.000129161	0.000131569	undecaprenyl-phosphate galactose phosphotransferase [EC:2.7.8.6]
K00997	0.000171894	0.000172887	0.000177982	0.000172477	0.00016994	0.000178487	0.000175803	0.000171166	0.000180793	0.000175688	0.000175616	0.00017903	0.000174013	0.000170878	0.000172464	0.000174769	0.000168647	holo-[acyl-carrier protein] synthase [EC:2.7.8.7]
K00998	5.50424e-07	9.22591e-07	5.10672e-07	8.97612e-07	8.03445e-07	6.87906e-07	7.55191e-07	6.88618e-07	6.95934e-07	1.24789e-06	7.92322e-07	7.76417e-07	8.17152e-07	7.51172e-07	9.0709e-07	6.82524e-07	6.76118e-07	CDP-diacylglycerol---serine O-phosphatidyltransferase [EC:2.7.8.8]
K01000	0.000201539	0.000205978	0.000205729	0.000204955	0.000211281	0.000200559	0.000203545	0.000201659	0.000200939	0.000202874	0.00020062	0.000198267	0.000201732	0.000207343	0.000204	0.000201205	0.000204266	phospho-N-acetylmuramoyl-pentapeptide-transferase [EC:2.7.8.13]
K01002	5.28289e-06	7.32109e-06	5.04212e-06	6.68356e-06	4.63278e-06	4.90095e-06	4.57597e-06	5.90123e-06	4.73804e-06	5.53536e-06	5.10391e-06	4.8679e-06	4.61549e-06	4.88757e-06	5.61532e-06	5.12231e-06	5.6897e-06	phosphoglycerol transferase [EC:2.7.8.20]
K01003	2.93962e-05	1.96627e-05	2.22937e-05	2.41283e-05	1.36386e-05	2.73323e-05	2.06595e-05	2.62784e-05	2.83693e-05	2.84216e-05	2.50708e-05	2.45258e-05	1.99684e-05	1.84439e-05	2.02924e-05	2.21029e-05	3.25793e-05	oxaloacetate decarboxylase [EC:4.1.1.3]
K01004	6.08559e-06	4.47239e-06	4.78092e-06	4.49018e-06	1.42296e-06	4.8972e-06	4.23874e-06	5.78703e-06	5.34876e-06	7.0312e-06	5.43682e-06	5.11202e-06	2.94564e-06	4.13356e-06	3.63571e-06	4.74425e-06	9.77543e-06	phosphatidylcholine synthase [EC:2.7.8.24]
K01006	7.72497e-05	0.000108323	8.15004e-05	8.055e-05	0.00012147	6.01369e-05	9.08356e-05	9.91112e-05	5.99865e-05	7.84357e-05	7.25389e-05	6.88634e-05	7.55834e-05	0.000111886	9.57836e-05	7.56127e-05	7.00241e-05	pyruvate, orthophosphate dikinase [EC:2.7.9.1]
K01007	0.000152674	0.000142677	0.000153222	0.000156569	0.00013418	0.000164089	0.000146475	0.000150295	0.000162983	0.000157353	0.000159471	0.000164645	0.00015165	0.000141718	0.000149699	0.000157547	0.000159707	pyruvate, water dikinase [EC:2.7.9.2]
K01008	0.000170157	0.000152361	0.000179447	0.000192654	0.000149586	0.000207352	0.00017926	0.000177801	0.000205057	0.000190815	0.00019287	0.000192722	0.000181835	0.000169412	0.000188046	0.00019097	0.000201517	selenide, water dikinase [EC:2.7.9.3]
K01011	0.000437773	0.000488016	0.000481385	0.00048717	0.000488217	0.000453013	0.00049065	0.000483179	0.000458065	0.000474484	0.000469459	0.000450495	0.00044661	0.000491551	0.000489654	0.000452185	0.000465034	thiosulfate/3-mercaptopyruvate sulfurtransferase [EC:2.8.1.1 2.8.1.2]
K01012	0.000157852	0.000157406	0.000161547	0.000164983	0.00016097	0.000164958	0.0001613	0.000161226	0.000160298	0.000163964	0.000164199	0.000160293	0.000161507	0.000160593	0.000165313	0.000164645	0.000169737	biotin synthase [EC:2.8.1.6]
K01014	8.82543e-07	1.44519e-06	9.0472e-07	1.43175e-06	1.40059e-06	8.85052e-07	1.33583e-06	1.45762e-06	8.87954e-07	1.19334e-06	1.06862e-06	8.62921e-07	6.36373e-07	1.01703e-06	1.50891e-06	9.31148e-07	1.14893e-06	aryl sulfotransferase [EC:2.8.2.1]
K01026	4.31558e-05	3.02848e-05	2.92667e-05	3.03447e-05	3.50629e-05	3.2414e-05	2.92925e-05	3.34953e-05	3.18476e-05	3.62546e-05	3.46169e-05	3.74038e-05	3.38434e-05	3.26625e-05	2.92453e-05	3.47496e-05	3.54054e-05	propionate CoA-transferase [EC:2.8.3.1]
K01027	3.35555e-05	5.05013e-05	3.75402e-05	4.09001e-05	3.79864e-05	3.15847e-05	3.76679e-05	3.99084e-05	4.01786e-05	4.02033e-05	3.34276e-05	3.97034e-05	3.13519e-05	3.62686e-05	3.54028e-05	3.19669e-05	3.51157e-05	3-oxoacid CoA-transferase [EC:2.8.3.5]
K01028	0.000294398	0.000256996	0.000282513	0.000259469	0.000269225	0.000278936	0.000264463	0.000261087	0.000300525	0.000278292	0.000263557	0.000296247	0.000282366	0.000263904	0.000246208	0.00027705	0.000279604	3-oxoacid CoA-transferase subunit A [EC:2.8.3.5]
K01029	0.000325245	0.000289639	0.000330035	0.000314175	0.000301483	0.000334827	0.000312272	0.00030184	0.000355314	0.000326007	0.000313816	0.000340712	0.000325643	0.000306353	0.000297945	0.000324737	0.000331511	3-oxoacid CoA-transferase subunit B [EC:2.8.3.5]
K01031	0.000162905	0.00014906	0.000168742	0.000153888	0.000150986	0.000174303	0.000161514	0.000153174	0.000191831	0.000167881	0.000157523	0.000186072	0.000170784	0.00015459	0.00014727	0.000165553	0.0001627	3-oxoadipate CoA-transferase, alpha subunit [EC:2.8.3.6]
K01032	0.00010938	0.000113406	0.000127497	0.000124484	0.000109107	0.000122463	0.000122555	0.000120917	0.000132083	0.000124094	0.000117662	0.000122571	0.000112568	0.000116502	0.000120425	0.000119504	0.000127774	3-oxoadipate CoA-transferase, beta subunit [EC:2.8.3.6]
K01034	0.00012008	9.48628e-05	0.000105903	8.81748e-05	0.000103134	9.9584e-05	9.63657e-05	9.40828e-05	0.00011754	0.000102276	9.32965e-05	0.000119836	0.000111068	9.65557e-05	8.10223e-05	0.000104651	9.61379e-05	acetate CoA/acetoacetate CoA-transferase alpha subunit [EC:2.8.3.8 2.8.3.9]
K01035	0.000187902	0.00014031	0.000152614	0.000141935	0.000165759	0.00015235	0.000141706	0.000143637	0.000163648	0.000154307	0.000144925	0.000165184	0.000166734	0.000149652	0.000131834	0.000159462	0.000154873	acetate CoA/acetoacetate CoA-transferase beta subunit [EC:2.8.3.8 2.8.3.9]
K01039	3.88379e-05	5.01439e-05	4.03167e-05	3.96615e-05	4.84529e-05	2.91557e-05	4.3294e-05	4.30324e-05	2.57277e-05	3.82872e-05	3.90302e-05	2.85796e-05	3.39472e-05	4.58174e-05	4.37378e-05	3.7169e-05	3.99577e-05	glutaconate CoA-transferase, subunit A [EC:2.8.3.12]
K01040	5.06386e-05	6.58417e-05	5.13857e-05	5.10801e-05	7.06979e-05	3.55111e-05	5.52357e-05	5.38921e-05	3.0215e-05	4.6781e-05	4.77352e-05	3.43436e-05	4.75655e-05	6.62005e-05	5.76825e-05	4.85678e-05	4.96371e-05	glutaconate CoA-transferase, subunit B [EC:2.8.3.12]
K01042	8.88821e-05	9.52638e-05	0.000109258	0.00013647	8.49451e-05	0.000132016	0.00011846	0.000117931	0.000129266	0.000119897	0.000124893	0.000112546	0.000107004	0.000112203	0.000135184	0.000119502	0.000126363	L-seryl-tRNA(Ser) seleniumtransferase [EC:2.9.1.1]
K01045	8.23064e-08	1.25669e-07	1.08672e-07	1.00543e-07	1.154e-07	7.74442e-08	1.03813e-07	1.61895e-07	6.77065e-08	9.767e-08	7.62785e-08	9.6497e-08	6.05933e-08	1.04194e-07	8.87806e-08	1.14435e-07	7.1867e-08	arylesterase / paraoxonase [EC:3.1.1.2 3.1.8.1]
K01046	0.000360758	0.000313496	0.000310023	0.000283566	0.000382432	0.000292049	0.000292087	0.000301325	0.000274592	0.00029393	0.000299715	0.0003112	0.000345192	0.000339254	0.000290356	0.000320332	0.000308918	triacylglycerol lipase [EC:3.1.1.3]
K01048	0.000232597	0.000214612	0.000219594	0.000221206	0.000217501	0.000243458	0.000217025	0.000223289	0.000245043	0.000234347	0.000228388	0.000245134	0.000226407	0.000210223	0.000215732	0.000226035	0.000229468	lysophospholipase [EC:3.1.1.5]
K01051	0.000135299	0.000152076	0.000128498	0.000132411	0.000113409	0.000123555	0.000149842	0.000143973	0.000125138	0.000133796	0.000138573	0.000117383	0.000116511	0.000107174	0.000140053	0.000126025	0.000115913	pectinesterase [EC:3.1.1.11]
K01053	0.000150314	0.00013524	0.000146002	0.00011341	0.000134865	0.000140065	0.00012693	0.000122557	0.000139477	0.000131449	0.000133614	0.000150272	0.000149543	0.000123173	0.000111063	0.00013696	0.000140964	gluconolactonase [EC:3.1.1.17]
K01055	0.000520397	0.000533299	0.000512692	0.000505389	0.000569235	0.000476327	0.000516699	0.00052533	0.000462507	0.000498939	0.000508431	0.000484034	0.000509451	0.000550684	0.000528846	0.000514224	0.000504994	3-oxoadipate enol-lactonase [EC:3.1.1.24]
K01056	0.00016687	0.000173719	0.000174739	0.000173988	0.000169864	0.000172916	0.000173513	0.000171251	0.000174752	0.000175409	0.000173178	0.000174603	0.000170589	0.000170891	0.000172471	0.000171756	0.00017648	peptidyl-tRNA hydrolase, PTH1 family [EC:3.1.1.29]
K01057	0.000151178	0.000175712	0.000166352	0.000173278	0.000170416	0.00015374	0.00017153	0.000169567	0.000159889	0.000164392	0.000157914	0.00015268	0.000158018	0.000175797	0.000174254	0.000160308	0.000166718	6-phosphogluconolactonase [EC:3.1.1.31]
K01058	9.44817e-05	6.78727e-05	7.68175e-05	7.16124e-05	7.46943e-05	8.49821e-05	6.79908e-05	7.26606e-05	8.52766e-05	7.71925e-05	7.60473e-05	8.6756e-05	8.6077e-05	6.57928e-05	6.49219e-05	8.06482e-05	7.86297e-05	phospholipase A1/A2 [EC:3.1.1.32 3.1.1.4]
K01060	0.000102548	0.000142675	0.000106781	0.000104618	0.000162535	6.83153e-05	0.000118291	0.00011462	6.1079e-05	9.10527e-05	9.17581e-05	7.06004e-05	0.000105424	0.000150891	0.000123506	9.75401e-05	8.76082e-05	cephalosporin-C deacetylase [EC:3.1.1.41]
K01061	0.000411529	0.000354963	0.000393033	0.000387119	0.000382925	0.000418248	0.00038318	0.000381985	0.000425783	0.000399273	0.00039252	0.000417058	0.00041081	0.000373621	0.000376035	0.000405169	0.000398434	carboxymethylenebutenolidase [EC:3.1.1.45]
K01066	0.00063514	0.000659337	0.00064765	0.000675504	0.000698526	0.000653481	0.00067613	0.000680702	0.000625757	0.000645833	0.000664408	0.000610134	0.000653478	0.000688343	0.000710757	0.000662475	0.000648598	acetyl esterase [EC:3.1.1.-]
K01067	4.17567e-05	3.36186e-05	2.99859e-05	3.32908e-05	4.12313e-05	3.24119e-05	3.08098e-05	3.47359e-05	3.20692e-05	3.53065e-05	3.49997e-05	3.76929e-05	3.54305e-05	3.46693e-05	3.16761e-05	3.5202e-05	3.12522e-05	acetyl-CoA hydrolase [EC:3.1.2.1]
K01069	0.000466406	0.000517089	0.000490136	0.000479808	0.000486312	0.000476258	0.000489608	0.000480776	0.000478883	0.000486472	0.000475682	0.000480861	0.000467229	0.000480671	0.000476156	0.000466629	0.000476207	hydroxyacylglutathione hydrolase [EC:3.1.2.6]
K01070	0.000144498	0.000128069	0.000139642	0.000148534	0.000124812	0.000159769	0.000138039	0.000139254	0.00015964	0.000149354	0.000148271	0.000151988	0.000146082	0.000128773	0.00014071	0.000148377	0.000154151	S-formylglutathione hydrolase [EC:3.1.2.12]
K01071	9.1025e-05	0.000125688	9.13826e-05	9.33747e-05	0.000128598	6.81612e-05	9.93225e-05	0.000109956	5.12039e-05	8.4199e-05	9.0518e-05	6.86673e-05	8.80626e-05	0.0001223	0.000113274	9.1626e-05	8.73281e-05	medium-chain acyl-[acyl-carrier-protein] hydrolase [EC:3.1.2.21]
K01073	3.19066e-06	4.97055e-06	5.2469e-06	2.33057e-06	3.11253e-06	8.41818e-06	2.21468e-06	2.43663e-06	2.46167e-06	3.23489e-06	6.5935e-06	5.5619e-06	6.55037e-06	1.25912e-06	2.94286e-06	4.80128e-06	7.24722e-06	acyl-CoA hydrolase [EC:3.1.2.20]
K01075	0.000102996	9.58704e-05	0.000105673	0.000112132	8.93042e-05	0.00012284	0.000105501	0.000105431	0.000122452	0.00011476	0.000115033	0.000117729	0.000107498	9.90397e-05	0.000105665	0.000106436	0.000113875	4-hydroxybenzoyl-CoA thioesterase [EC:3.1.2.23]
K01077	0.000232448	0.000229187	0.000227346	0.000191506	0.00021108	0.000200829	0.000209095	0.000205884	0.000214277	0.000208248	0.000203386	0.000225734	0.000216093	0.000199758	0.000186585	0.000212392	0.000207323	alkaline phosphatase [EC:3.1.3.1]
K01079	0.000184784	0.000178441	0.000188774	0.000182529	0.000178884	0.000187611	0.000185621	0.000187018	0.000188227	0.00018763	0.000185321	0.000185086	0.000180746	0.000181466	0.000181742	0.000182036	0.000190729	phosphoserine phosphatase [EC:3.1.3.3]
K01081	0.000281882	0.000240421	0.000257871	0.000250304	0.000264401	0.000264967	0.000245888	0.000250416	0.000257537	0.000256248	0.00026293	0.000268674	0.000269656	0.000248162	0.000246383	0.00026772	0.000263483	5-nucleotidase [EC:3.1.3.5]
K01082	7.74609e-05	0.000108869	8.65708e-05	8.29356e-05	9.4562e-05	6.69662e-05	8.66423e-05	8.7497e-05	7.95986e-05	8.68404e-05	7.50777e-05	8.19993e-05	7.11294e-05	9.16274e-05	8.02541e-05	7.23497e-05	7.73052e-05	3(2), 5-bisphosphate nucleotidase [EC:3.1.3.7]
K01083	0.000159518	0.000145969	0.000156133	0.000165506	0.000139317	0.00016974	0.000149543	0.000153817	0.000168936	0.000161283	0.000160745	0.000163227	0.00015676	0.000141417	0.000154965	0.00016148	0.000170119	3-phytase [EC:3.1.3.8]
K01086	0.000172187	0.00013614	0.000158654	0.000160196	0.000151932	0.000177986	0.000152228	0.000153724	0.000176709	0.000166706	0.000167174	0.000175056	0.000168128	0.000148647	0.000152501	0.00016723	0.000170843	fructose-1,6-bisphosphatase I / sedoheptulose-1,7-bisphosphatase [EC:3.1.3.11 3.1.3.37]
K01087	0.000409809	0.000387627	0.000388251	0.000406702	0.000437794	0.000387799	0.000398045	0.000406426	0.000390545	0.000392875	0.000386501	0.000385201	0.000402851	0.000423312	0.000410852	0.000400302	0.00038317	trehalose 6-phosphate phosphatase [EC:3.1.3.12]
K01089	5.26977e-05	4.93662e-05	4.13828e-05	4.69272e-05	5.21803e-05	4.30831e-05	4.25823e-05	4.72408e-05	4.30892e-05	4.88938e-05	4.60926e-05	4.8824e-05	4.52804e-05	4.39309e-05	4.62287e-05	4.72692e-05	4.41844e-05	imidazoleglycerol-phosphate dehydratase / histidinol-phosphatase [EC:4.2.1.19 3.1.3.15]
K01090	5.17436e-05	7.0846e-05	5.07876e-05	5.73124e-05	7.17547e-05	4.04991e-05	6.12527e-05	7.12075e-05	3.50571e-05	5.35822e-05	5.35812e-05	4.29544e-05	4.70612e-05	6.86039e-05	6.7832e-05	5.12571e-05	5.30127e-05	protein phosphatase [EC:3.1.3.16]
K01091	0.000580343	0.00058076	0.000583471	0.000583686	0.000573846	0.000588126	0.000578954	0.000579328	0.00058598	0.000588186	0.000581821	0.000588497	0.000579665	0.000574471	0.000575402	0.000578663	0.000588908	phosphoglycolate phosphatase [EC:3.1.3.18]
K01092	0.000493542	0.000566937	0.000516406	0.00047298	0.00050602	0.000458576	0.000515004	0.000495229	0.00050098	0.000502093	0.000475354	0.000506438	0.00046698	0.000497574	0.000468265	0.000464653	0.000446816	myo-inositol-1(or 4)-monophosphatase [EC:3.1.3.25]
K01093	1.73486e-06	2.79689e-06	1.81253e-06	2.51887e-06	2.92637e-06	1.80815e-06	2.50475e-06	3.16883e-06	1.84695e-06	2.26511e-06	1.78165e-06	1.56737e-06	1.65831e-06	1.77878e-06	2.78567e-06	1.81461e-06	2.15885e-06	4-phytase / acid phosphatase [EC:3.1.3.26 3.1.3.2]
K01095	0.000113457	8.64253e-05	0.000108917	0.000114115	9.56e-05	0.000125539	0.000107178	0.000104689	0.000130431	0.000114829	0.000113545	0.000120336	0.000117744	0.00010183	0.000107329	0.000115764	0.000113662	phosphatidylglycerophosphatase A [EC:3.1.3.27]
K01101	3.95756e-05	5.16516e-05	4.39208e-05	4.03969e-05	5.8308e-05	2.84294e-05	4.58719e-05	4.59776e-05	2.32598e-05	3.5966e-05	3.94995e-05	2.72065e-05	3.59428e-05	5.03308e-05	4.77416e-05	3.78594e-05	3.62128e-05	4-nitrophenyl phosphatase [EC:3.1.3.41]
K01103	2.06409e-06	2.95321e-06	1.82446e-06	2.52813e-06	4.02049e-06	2.3607e-06	2.41417e-06	2.62116e-06	2.75599e-06	2.58722e-06	2.64193e-06	3.06388e-06	2.40515e-06	3.36025e-06	2.50296e-06	2.40723e-06	2.42646e-06	6-phosphofructo-2-kinase / fructose-2,6-biphosphatase 3 [EC:2.7.1.105 3.1.3.46]
K01104	0.000367477	0.000379387	0.000380629	0.000412206	0.000400773	0.000394803	0.000397508	0.000392559	0.000387391	0.000389476	0.00038788	0.000365793	0.000391112	0.000413702	0.00041811	0.000394549	0.000401475	protein-tyrosine phosphatase [EC:3.1.3.48]
K01113	0.000482097	0.000461828	0.000454985	0.000427352	0.000488265	0.000444537	0.000436498	0.000434183	0.000448581	0.000435252	0.000430183	0.000456904	0.000470313	0.000466813	0.000429921	0.000458575	0.000427761	alkaline phosphatase D [EC:3.1.3.1]
K01114	0.000184141	0.000171691	0.000169806	0.00015199	0.000184053	0.000167422	0.000153461	0.000159877	0.000156595	0.000157469	0.000162556	0.000171612	0.00018354	0.000165807	0.000153452	0.000170602	0.000167724	phospholipase C [EC:3.1.4.3]
K01115	4.31953e-05	3.58426e-05	3.04237e-05	3.25366e-05	4.31535e-05	3.5074e-05	3.27107e-05	3.40373e-05	3.55182e-05	3.80256e-05	3.63443e-05	4.14204e-05	3.76227e-05	3.63305e-05	3.35072e-05	3.77941e-05	3.27088e-05	phospholipase D1/2 [EC:3.1.4.4]
K01117	1.7588e-05	2.48748e-05	1.85341e-05	1.78989e-05	2.73935e-05	1.1747e-05	1.91245e-05	1.85001e-05	9.27599e-06	1.52034e-05	1.65481e-05	1.29635e-05	1.89311e-05	2.6541e-05	2.07391e-05	1.74578e-05	1.46868e-05	sphingomyelin phosphodiesterase [EC:3.1.4.12]
K01118	0.000276701	0.000251584	0.000259094	0.000285038	0.000255821	0.000285311	0.000263263	0.000272239	0.000277137	0.0002791	0.000282525	0.000277935	0.000275658	0.000266291	0.000278263	0.000279824	0.000284223	FMN-dependent NADH-azoreductase [EC:1.7.1.17]
K01119	8.19877e-05	7.90173e-05	8.18872e-05	6.68766e-05	7.83808e-05	7.47823e-05	7.36063e-05	7.30889e-05	7.94833e-05	7.26893e-05	6.8386e-05	7.95792e-05	7.98616e-05	7.53696e-05	6.53104e-05	7.38731e-05	7.019e-05	2,3-cyclic-nucleotide 2-phosphodiesterase / 3-nucleotidase [EC:3.1.4.16 3.1.3.6]
K01120	2.09667e-06	2.9762e-06	1.86746e-06	2.55371e-06	4.08364e-06	2.37013e-06	2.44606e-06	2.6472e-06	2.76672e-06	2.60869e-06	2.65512e-06	3.08447e-06	2.41602e-06	3.38174e-06	2.52188e-06	2.42721e-06	2.45483e-06	3,5-cyclic-nucleotide phosphodiesterase [EC:3.1.4.17]
K01126	0.000698703	0.000688146	0.000694997	0.000643429	0.00072706	0.000640531	0.000682181	0.000679374	0.000647911	0.000663373	0.000652461	0.000660988	0.000670914	0.000692	0.000657243	0.000663834	0.000658978	glycerophosphoryl diester phosphodiesterase [EC:3.1.4.46]
K01127	6.43018e-09	1.04724e-08	1.72286e-08	1.25679e-08	1.25198e-08	1.24584e-08	9.66889e-09	1.01892e-08	1.77591e-08	1.35076e-08	1.67755e-08	1.41314e-08	1.95785e-08	1.67687e-08	9.09637e-09	8.40099e-09	1.41843e-08	glycosylphosphatidylinositol phospholipase D [EC:3.1.4.50]
K01129	0.000167508	0.000177048	0.000177919	0.000171897	0.000167163	0.000173311	0.00017863	0.000172969	0.000173499	0.000176656	0.000178196	0.000175155	0.000170545	0.000170743	0.00017446	0.000172595	0.00017357	dGTPase [EC:3.1.5.1]
K01130	0.000177757	0.000145861	0.000182898	0.00016301	0.00013721	0.000184198	0.000166709	0.000159922	0.000212218	0.000183264	0.000164791	0.000192418	0.000173597	0.000156437	0.000146181	0.000175995	0.000203517	arylsulfatase [EC:3.1.6.1]
K01133	9.01146e-05	7.93834e-05	9.89968e-05	9.88443e-05	6.9831e-05	0.000108291	9.60063e-05	9.03453e-05	0.000121247	0.000100343	9.42821e-05	0.000104935	9.6184e-05	8.64539e-05	8.9801e-05	9.58319e-05	0.000101828	choline-sulfatase [EC:3.1.6.6]
K01134	2.95788e-08	1.44825e-07	1.48872e-07	7.34229e-08	7.51189e-08	8.48519e-08	1.35364e-07	7.89661e-08	1.81476e-07	1.77676e-07	5.7639e-08	1.28999e-07	1.02037e-07	1.01589e-07	9.16914e-08	2.04348e-08	7.9432e-08	arylsulfatase A [EC:3.1.6.8]
K01135	5.85147e-07	5.89774e-07	6.77215e-07	4.92793e-07	5.28554e-07	6.14503e-07	6.34584e-07	7.45508e-07	8.49106e-07	6.88885e-07	4.64123e-07	6.14916e-07	5.87212e-07	5.12991e-07	5.04667e-07	5.1791e-07	5.4184e-07	arylsulfatase B [EC:3.1.6.12]
K01136	1.58183e-07	6.15316e-07	6.07417e-07	3.84974e-07	3.2987e-07	4.51533e-07	5.496e-07	3.79547e-07	7.60311e-07	6.85768e-07	2.79592e-07	5.25687e-07	5.12757e-07	4.05379e-07	4.51908e-07	1.3487e-07	3.8203e-07	iduronate 2-sulfatase [EC:3.1.6.13]
K01137	5.42152e-06	4.64026e-06	7.28948e-06	4.71231e-06	7.8071e-06	4.07452e-06	5.32672e-06	4.59274e-06	3.70921e-06	4.47548e-06	5.2655e-06	3.40094e-06	3.9693e-06	5.31819e-06	4.81773e-06	4.30725e-06	5.77603e-06	N-acetylglucosamine-6-sulfatase [EC:3.1.6.14]
K01138	5.72177e-06	4.16584e-06	4.42213e-06	4.03337e-06	1.13609e-06	4.38371e-06	3.68252e-06	5.32664e-06	4.8969e-06	6.56488e-06	4.93691e-06	4.77654e-06	2.47847e-06	3.74072e-06	3.36005e-06	4.33696e-06	9.45278e-06	uncharacterized sulfatase [EC:3.1.6.-]
K01139	0.000305379	0.000265282	0.000275188	0.000276584	0.00027542	0.000289102	0.000266162	0.000274	0.000299362	0.000287487	0.000276556	0.00030054	0.000289268	0.000268103	0.000262332	0.000284404	0.000280179	GTP diphosphokinase / guanosine-3,5-bis(diphosphate) 3-diphosphatase [EC:2.7.6.5 3.1.7.2]
K01141	6.56797e-05	4.94484e-05	6.06888e-05	5.39164e-05	4.46331e-05	6.46648e-05	4.96739e-05	5.42302e-05	6.60437e-05	5.75581e-05	5.58723e-05	6.20451e-05	6.10058e-05	4.31553e-05	4.62796e-05	5.7258e-05	6.63775e-05	exodeoxyribonuclease I [EC:3.1.11.1]
K01142	0.000481277	0.000459783	0.000478612	0.00049045	0.00045906	0.000509795	0.000473622	0.000472076	0.000517729	0.000492094	0.000486428	0.000504441	0.000489129	0.000465029	0.000476227	0.000490032	0.000494954	exodeoxyribonuclease III [EC:3.1.11.2]
K01143	8.35924e-08	9.50177e-08	1.38712e-07	8.33449e-08	6.20547e-08	7.87911e-08	1.05849e-07	9.84953e-08	1.32083e-07	1.18451e-07	7.74256e-08	4.48166e-08	4.45875e-08	1.32847e-07	5.45782e-08	8.71887e-08	3.02598e-08	exodeoxyribonuclease (lambda-induced) [EC:3.1.11.3]
K01144	1.0526e-05	1.72481e-05	1.50405e-05	1.00796e-05	9.93344e-06	1.01838e-05	1.42588e-05	1.18492e-05	1.7039e-05	1.40094e-05	9.5107e-06	1.6391e-05	9.87771e-06	1.20873e-05	7.74109e-06	8.42184e-06	8.24731e-06	exodeoxyribonuclease V [EC:3.1.11.5]
K01146	6.67509e-06	9.34813e-06	6.17174e-06	8.99575e-06	6.43959e-06	6.30232e-06	6.20664e-06	7.74462e-06	6.22749e-06	7.69496e-06	6.81267e-06	6.20047e-06	6.19619e-06	6.30979e-06	7.55775e-06	6.40236e-06	7.70447e-06	protein Xni
K01147	9.74309e-05	7.75107e-05	9.94472e-05	9.87464e-05	8.58498e-05	0.000114157	9.44436e-05	8.9949e-05	0.000112119	9.97535e-05	0.000103303	0.00010889	0.000107691	9.03837e-05	9.50141e-05	0.00010564	0.00010599	exoribonuclease II [EC:3.1.13.1]
K01150	1.14134e-05	7.54548e-06	8.91747e-06	8.67008e-06	2.07121e-06	9.63574e-06	7.34089e-06	1.08563e-05	9.81393e-06	1.31342e-05	1.09517e-05	9.54937e-06	6.07105e-06	7.08876e-06	6.94308e-06	8.35694e-06	1.95888e-05	deoxyribonuclease I [EC:3.1.21.1]
K01151	4.70715e-05	6.4155e-05	4.88228e-05	4.90488e-05	7.42769e-05	3.17898e-05	5.40627e-05	5.37257e-05	2.50284e-05	4.15232e-05	4.45894e-05	3.04655e-05	4.61987e-05	6.68042e-05	5.88118e-05	4.60155e-05	4.17004e-05	deoxyribonuclease IV [EC:3.1.21.2]
K01153	0.0002054	0.000182705	0.000194741	0.00020098	0.000188976	0.000200505	0.000191893	0.000199631	0.000208434	0.000202784	0.000194135	0.000201048	0.00020019	0.00019464	0.000194428	0.000201788	0.000206906	type I restriction enzyme, R subunit [EC:3.1.21.3]
K01154	0.000178596	0.000174318	0.000173929	0.000186935	0.000177848	0.00018259	0.000175003	0.000188172	0.000176774	0.000181647	0.000180305	0.000176014	0.000178696	0.000179489	0.000186854	0.000180956	0.000184957	type I restriction enzyme, S subunit [EC:3.1.21.3]
K01155	1.09258e-05	1.74914e-05	1.66179e-05	1.07894e-05	1.03588e-05	1.07767e-05	1.4343e-05	1.31438e-05	1.71742e-05	1.46809e-05	9.74375e-06	1.67425e-05	1.01568e-05	1.22844e-05	8.78444e-06	9.14632e-06	8.78234e-06	type II restriction enzyme [EC:3.1.21.4]
K01156	3.23175e-05	3.84967e-05	4.56174e-05	5.89884e-05	3.62743e-05	5.59157e-05	5.01156e-05	4.74872e-05	5.51367e-05	4.96627e-05	5.28464e-05	4.67746e-05	4.63549e-05	4.77196e-05	5.81262e-05	5.03012e-05	5.33718e-05	type III restriction enzyme [EC:3.1.21.5]
K01159	0.000214188	0.000219777	0.000230078	0.000245219	0.000212223	0.000244284	0.000233608	0.00022993	0.000245715	0.000237036	0.000237866	0.000232879	0.000228382	0.000225452	0.000240044	0.000231935	0.000239917	crossover junction endodeoxyribonuclease RuvC [EC:3.1.22.4]
K01160	3.63093e-05	2.51836e-05	2.3617e-05	2.51586e-05	3.30499e-05	2.65363e-05	2.43112e-05	2.67528e-05	2.56484e-05	2.82945e-05	2.85954e-05	3.14451e-05	3.02967e-05	2.78699e-05	2.49856e-05	2.94418e-05	2.49066e-05	crossover junction endodeoxyribonuclease RusA [EC:3.1.22.4]
K01163	7.71622e-09	6.64102e-09	8.30505e-08	5.86501e-08	1.52415e-08	1.48154e-08	3.25689e-08	1.18874e-07	2.29388e-08	1.76637e-07	1.14705e-08	1.69576e-08	8.57453e-09	8.20526e-08	3.78409e-08	4.54108e-09	2.1434e-08	uncharacterized protein
K01166	5.88325e-05	4.73999e-05	5.61184e-05	4.44762e-05	4.12364e-05	5.41963e-05	4.9451e-05	4.57853e-05	6.90453e-05	5.25846e-05	4.41992e-05	6.10068e-05	5.34352e-05	4.28879e-05	3.57868e-05	4.82122e-05	4.63671e-05	ribonuclease T2 [EC:3.1.27.1]
K01167	0.000118787	0.000112708	0.000107325	0.00010349	0.000124771	9.4235e-05	0.000106451	0.000113074	9.38386e-05	0.000104264	0.000101364	0.000101541	0.000107439	0.000112222	0.000106455	0.000106781	0.000101319	ribonuclease T1 [EC:3.1.27.3]
K01173	5.6262e-05	5.3611e-05	4.77313e-05	4.63935e-05	5.53762e-05	5.18143e-05	4.54836e-05	4.94545e-05	4.51837e-05	5.14306e-05	5.30395e-05	5.61132e-05	5.0656e-05	4.68577e-05	4.67458e-05	5.22568e-05	4.91815e-05	endonuclease G, mitochondrial
K01174	8.7843e-05	9.71617e-05	9.89098e-05	0.000113686	8.69145e-05	0.00010799	0.000106786	0.000105498	0.000105653	0.000105578	0.00011008	9.26391e-05	9.14342e-05	9.45902e-05	0.000112671	9.8496e-05	0.000108741	micrococcal nuclease [EC:3.1.31.1]
K01175	2.98593e-05	3.78287e-05	3.01724e-05	3.20776e-05	5.16389e-05	2.15485e-05	3.43119e-05	3.86088e-05	1.74121e-05	2.70174e-05	2.74446e-05	2.04888e-05	2.95535e-05	4.45488e-05	3.88676e-05	2.88444e-05	2.87786e-05	esterase [EC:3.1.-.-]
K01176	0.000432577	0.000349524	0.000373922	0.00032953	0.000375547	0.000370953	0.000353193	0.000346451	0.000395396	0.000359146	0.000352044	0.00040027	0.000401987	0.000346843	0.000316203	0.000379485	0.000351987	alpha-amylase [EC:3.2.1.1]
K01178	0.000139438	0.000166113	0.000124906	0.000131489	0.000210795	9.89817e-05	0.000138923	0.000144778	8.56671e-05	0.000120442	0.000119299	0.000104751	0.000138128	0.000187743	0.000155114	0.000133122	0.000117984	glucoamylase [EC:3.2.1.3]
K01179	0.000784372	0.000873465	0.000716424	0.000713859	0.000767836	0.000680336	0.000751072	0.00080165	0.000587149	0.000717353	0.00079268	0.00070944	0.000688737	0.000702497	0.000775772	0.00073937	0.000660374	endoglucanase [EC:3.2.1.4]
K01181	0.0002572	0.000397903	0.000280571	0.000290055	0.0002922	0.000213541	0.000340321	0.000350005	0.000187199	0.000280071	0.000310562	0.000230761	0.00021733	0.000279897	0.000346769	0.000267408	0.00022974	endo-1,4-beta-xylanase [EC:3.2.1.8]
K01182	0.000342522	0.000287024	0.000278132	0.000255138	0.000308981	0.00027613	0.000268841	0.000269699	0.000289492	0.000291396	0.000286175	0.000327429	0.000300987	0.000274455	0.000247586	0.000294575	0.000261223	oligo-1,6-glucosidase [EC:3.2.1.10]
K01183	0.00077869	0.000834282	0.000695542	0.000692243	0.000853239	0.000632305	0.000716156	0.000768645	0.000556532	0.00067505	0.000718424	0.000663241	0.000711316	0.000783092	0.000757087	0.000724151	0.000642446	chitinase [EC:3.2.1.14]
K01184	3.12164e-06	5.01537e-06	5.4264e-06	2.32903e-06	3.26223e-06	8.40943e-06	2.30408e-06	2.76579e-06	2.40941e-06	2.76853e-06	6.36883e-06	5.29028e-06	6.43475e-06	1.07694e-06	2.97051e-06	4.70274e-06	7.33753e-06	polygalacturonase [EC:3.2.1.15]
K01185	0.000137436	0.000161649	0.00016587	0.00017413	0.000138794	0.000197551	0.000163588	0.000162058	0.00016216	0.000164906	0.000191466	0.000172138	0.000169375	0.000150736	0.000182308	0.000175671	0.000182114	lysozyme [EC:3.2.1.17]
K01186	5.49966e-05	6.29576e-05	5.43214e-05	5.68585e-05	6.2883e-05	5.29624e-05	6.21037e-05	7.47249e-05	4.21698e-05	5.35413e-05	5.76909e-05	4.54869e-05	4.91353e-05	5.55537e-05	6.66907e-05	5.02769e-05	5.31579e-05	sialidase-1 [EC:3.2.1.18]
K01187	0.000577395	0.000583734	0.000525181	0.000491421	0.000588136	0.000486287	0.000516677	0.00053169	0.000473613	0.000515098	0.000521028	0.000531768	0.000524452	0.000532526	0.000509376	0.000529081	0.000481554	alpha-glucosidase [EC:3.2.1.20]
K01190	9.76558e-05	0.000133055	0.000100735	9.97165e-05	0.000117882	8.00809e-05	0.00011184	0.000123868	7.94291e-05	9.97001e-05	9.68125e-05	9.22166e-05	8.57844e-05	0.000114168	0.000115412	9.58281e-05	8.1063e-05	beta-galactosidase [EC:3.2.1.23]
K01191	6.26964e-05	9.36804e-05	7.16363e-05	6.43183e-05	8.89975e-05	4.69817e-05	7.68511e-05	7.61055e-05	5.36331e-05	6.42329e-05	5.68291e-05	6.04294e-05	6.19879e-05	8.87389e-05	7.11518e-05	5.79631e-05	5.25789e-05	alpha-mannosidase [EC:3.2.1.24]
K01192	6.52519e-05	7.04564e-05	6.70284e-05	5.88066e-05	5.88249e-05	5.66012e-05	6.7237e-05	6.67681e-05	6.6688e-05	6.36728e-05	5.79351e-05	6.60951e-05	6.01979e-05	5.85615e-05	5.72859e-05	5.93156e-05	5.71279e-05	beta-mannosidase [EC:3.2.1.25]
K01193	3.46815e-05	5.64506e-05	4.83893e-05	3.50809e-05	3.65602e-05	3.26373e-05	4.77527e-05	4.43153e-05	5.0934e-05	4.487e-05	3.15487e-05	5.11068e-05	3.2254e-05	4.21869e-05	3.05899e-05	2.82521e-05	2.85162e-05	beta-fructofuranosidase [EC:3.2.1.26]
K01194	3.59446e-05	5.09965e-05	3.53019e-05	3.83325e-05	5.82258e-05	2.73909e-05	4.20201e-05	4.8993e-05	2.32722e-05	3.73086e-05	3.44263e-05	2.95676e-05	3.5378e-05	5.2868e-05	5.00772e-05	3.84089e-05	3.24906e-05	alpha,alpha-trehalase [EC:3.2.1.28]
K01195	2.60419e-05	4.26374e-05	3.24416e-05	2.83692e-05	2.48297e-05	2.28082e-05	3.59538e-05	3.30203e-05	2.78967e-05	3.13868e-05	2.99128e-05	2.9438e-05	2.25312e-05	2.69924e-05	2.92697e-05	2.44033e-05	2.18868e-05	beta-glucuronidase [EC:3.2.1.31]
K01197	4.34334e-05	5.82767e-05	4.11168e-05	4.44715e-05	7.97958e-05	2.55988e-05	4.73961e-05	4.87386e-05	1.83196e-05	3.42821e-05	3.43576e-05	2.39611e-05	4.78401e-05	7.32523e-05	5.53552e-05	4.18712e-05	3.72635e-05	hyaluronoglucosaminidase [EC:3.2.1.35]
K01198	0.000146743	0.000172579	0.000156828	0.000129747	0.000133602	0.000136009	0.000157547	0.000146945	0.000151236	0.000148561	0.000141206	0.000157026	0.00013821	0.00013023	0.000134842	0.000143455	0.000130414	xylan 1,4-beta-xylosidase [EC:3.2.1.37]
K01200	0.000197621	0.000152552	0.000173179	0.000146736	0.000162424	0.000174431	0.000154965	0.000153605	0.000178021	0.000157961	0.000160145	0.000180114	0.000185601	0.000150313	0.000140902	0.000174497	0.00016424	pullulanase [EC:3.2.1.41]
K01201	0.000235121	0.000278441	0.000214589	0.000240262	0.000254403	0.000192206	0.000259111	0.000292208	0.000173959	0.000227991	0.000238993	0.000194695	0.000195583	0.000238739	0.000275121	0.000217726	0.000194769	glucosylceramidase [EC:3.2.1.45]
K01205	1.26093e-05	1.73286e-05	1.22365e-05	1.27413e-05	2.32136e-05	7.34221e-06	1.32654e-05	1.22632e-05	5.47128e-06	1.02285e-05	9.83376e-06	7.23617e-06	1.46792e-05	2.18357e-05	1.52784e-05	1.22791e-05	1.07002e-05	alpha-N-acetylglucosaminidase [EC:3.2.1.50]
K01206	0.000124599	0.000172045	0.000122905	0.000128464	0.000208205	8.14158e-05	0.000133642	0.000135989	7.12758e-05	0.000107754	0.000102825	8.45588e-05	0.000133402	0.000193145	0.000149169	0.000119971	0.000108038	alpha-L-fucosidase [EC:3.2.1.51]
K01207	0.000303399	0.000319203	0.000299487	0.000299781	0.000308738	0.000280982	0.000309525	0.000311939	0.000296623	0.000304797	0.000292487	0.000296587	0.000284502	0.00030439	0.000300009	0.000286014	0.000279747	beta-N-acetylhexosaminidase [EC:3.2.1.52]
K01208	8.81327e-05	6.02005e-05	6.76504e-05	6.42455e-05	7.12731e-05	7.5331e-05	6.45144e-05	6.48033e-05	8.21812e-05	7.22292e-05	6.81855e-05	8.15076e-05	7.80491e-05	6.41621e-05	5.9112e-05	7.43609e-05	6.79695e-05	cyclomaltodextrinase / maltogenic alpha-amylase / neopullulanase [EC:3.2.1.54 3.2.1.133 3.2.1.135]
K01209	0.000132503	0.000181832	0.000151629	0.000130577	0.000124181	0.000122906	0.000161625	0.000150128	0.000135893	0.000143778	0.000140759	0.00014277	0.000121778	0.000123742	0.000136124	0.00012794	0.000118291	alpha-N-arabinofuranosidase [EC:3.2.1.55]
K01210	6.65342e-06	5.01333e-06	5.50025e-06	5.90051e-06	2.10959e-06	6.31288e-06	4.97354e-06	6.77509e-06	6.32732e-06	8.53643e-06	7.21764e-06	6.12907e-06	4.67555e-06	4.58957e-06	4.8953e-06	5.07579e-06	1.11378e-05	glucan 1,3-beta-glucosidase [EC:3.2.1.58]
K01212	8.97034e-06	1.33737e-05	9.48519e-06	9.41526e-06	1.19317e-05	6.53671e-06	1.07911e-05	1.36959e-05	5.2709e-06	9.16115e-06	9.74528e-06	8.46671e-06	7.16182e-06	1.151e-05	1.23561e-05	9.67544e-06	7.26576e-06	levanase [EC:3.2.1.65]
K01214	0.000225206	0.000227839	0.000192226	0.000198105	0.000246985	0.000176743	0.000206546	0.000219832	0.000172531	0.000203266	0.00020049	0.000197117	0.000195769	0.000221511	0.000208158	0.00019846	0.000178442	isoamylase [EC:3.2.1.68]
K01215	5.37338e-05	4.84311e-05	3.99265e-05	4.37016e-05	6.43971e-05	3.7568e-05	4.40468e-05	4.79531e-05	3.38221e-05	4.3423e-05	4.33188e-05	4.18625e-05	4.91032e-05	5.6459e-05	4.81923e-05	4.63368e-05	4.02967e-05	glucan 1,6-alpha-glucosidase [EC:3.2.1.70]
K01216	3.93399e-06	6.46886e-06	4.01403e-06	3.72406e-06	4.98152e-06	5.12849e-06	4.78457e-06	3.46687e-06	5.73091e-06	5.70227e-06	4.17797e-06	5.96878e-06	3.95714e-06	4.25697e-06	5.03048e-06	5.42137e-06	4.31817e-06	licheninase [EC:3.2.1.73]
K01218	0.000303448	0.000318121	0.000252855	0.0002645	0.000293693	0.000236286	0.000283714	0.00029882	0.00021275	0.000274201	0.000299762	0.000264523	0.000253552	0.000262453	0.000291097	0.00027637	0.000234345	mannan endo-1,4-beta-mannosidase [EC:3.2.1.78]
K01219	5.31037e-06	3.45474e-06	3.92789e-06	3.66718e-06	7.65069e-07	4.01077e-06	3.12254e-06	4.76981e-06	4.18254e-06	5.84566e-06	4.52638e-06	4.19671e-06	2.21266e-06	3.25036e-06	2.95487e-06	3.96368e-06	9.12711e-06	beta-agarase [EC:3.2.1.81]
K01222	5.45757e-05	7.83635e-05	5.49044e-05	5.7785e-05	8.46972e-05	3.68737e-05	6.45538e-05	7.10055e-05	2.88923e-05	5.02786e-05	5.27145e-05	3.91424e-05	5.29794e-05	7.95923e-05	7.28063e-05	5.51439e-05	4.6564e-05	6-phospho-beta-glucosidase [EC:3.2.1.86]
K01223	0.00015992	0.000158594	0.000146251	0.000133712	0.000186383	0.000125765	0.000143105	0.000139905	0.00012305	0.000131864	0.000130671	0.000130497	0.000156785	0.000170326	0.00014011	0.000141354	0.000132335	6-phospho-beta-glucosidase [EC:3.2.1.86]
K01224	8.22025e-06	1.17943e-05	8.12259e-06	9.96298e-06	1.30516e-05	7.81792e-06	1.12151e-05	1.37765e-05	6.86374e-06	9.66774e-06	8.50969e-06	7.93517e-06	7.36721e-06	1.08573e-05	1.30168e-05	8.95551e-06	8.6892e-06	arabinogalactan endo-1,4-beta-galactosidase [EC:3.2.1.89]
K01226	0.000184948	0.00017279	0.000150416	0.000153274	0.000188298	0.000143793	0.000155168	0.000164852	0.00014474	0.000161881	0.000159699	0.00016614	0.000159329	0.000168948	0.000155605	0.000158855	0.00014034	trehalose-6-phosphate hydrolase [EC:3.2.1.93]
K01227	8.90767e-06	1.33432e-05	9.51744e-06	9.43713e-06	1.17859e-05	6.56318e-06	1.07988e-05	1.36408e-05	5.33402e-06	9.17458e-06	9.7548e-06	8.48517e-06	7.21167e-06	1.14803e-05	1.23156e-05	9.60696e-06	7.29337e-06	mannosyl-glycoprotein endo-beta-N-acetylglucosaminidase [EC:3.2.1.96]
K01230	1.18071e-05	1.57083e-05	1.10862e-05	1.14313e-05	2.22575e-05	6.36793e-06	1.19514e-05	1.08699e-05	4.50507e-06	8.50734e-06	8.72185e-06	5.77811e-06	1.36378e-05	2.03998e-05	1.39538e-05	1.14072e-05	9.69354e-06	mannosyl-oligosaccharide alpha-1,2-mannosidase [EC:3.2.1.113]
K01232	7.26778e-06	1.16141e-05	7.76398e-06	9.26306e-06	7.07032e-06	6.45602e-06	1.12568e-05	1.06565e-05	5.50143e-06	8.48566e-06	9.93662e-06	5.16953e-06	6.30571e-06	6.6361e-06	1.08685e-05	7.17127e-06	6.94481e-06	maltose-6-phosphate glucosidase [EC:3.2.1.122]
K01233	0.000164363	0.000178945	0.000140805	0.000152984	0.000203158	0.00012165	0.000157859	0.000171809	0.000108703	0.000140249	0.000143244	0.000122891	0.000149062	0.000187253	0.000173002	0.000148814	0.000129141	chitosanase [EC:3.2.1.132]
K01235	1.06612e-05	1.70001e-05	1.1414e-05	1.33746e-05	1.15192e-05	1.03043e-05	1.60474e-05	1.50477e-05	9.3646e-06	1.29077e-05	1.34494e-05	9.16281e-06	9.50623e-06	1.00318e-05	1.54451e-05	1.11437e-05	1.07478e-05	alpha-glucuronidase [EC:3.2.1.139]
K01236	0.000171522	0.000169014	0.000151624	0.000153229	0.000170105	0.000146801	0.000159751	0.000168449	0.000155368	0.000157753	0.000150207	0.000156305	0.000152486	0.000159339	0.000152896	0.000150366	0.000140539	maltooligosyltrehalose trehalohydrolase [EC:3.2.1.141]
K01239	0.000111417	0.00015483	0.000119028	0.000117168	0.000129317	9.1889e-05	0.000127392	0.000127783	9.97847e-05	0.000115082	0.000107816	0.000106034	0.000101774	0.000128505	0.000122147	0.000104692	9.54813e-05	purine nucleosidase [EC:3.2.2.1]
K01241	0.000126543	0.000117616	0.00012983	0.00013185	0.000111217	0.000136983	0.000127042	0.000123218	0.000149333	0.000137384	0.000128637	0.000141556	0.000129451	0.000120377	0.00012254	0.000130034	0.000135146	AMP nucleosidase [EC:3.2.2.4]
K01243	0.000153359	0.000130341	0.000148035	0.000141985	0.000141439	0.00015971	0.000142107	0.000136041	0.000163287	0.00015144	0.000149641	0.000164963	0.000155159	0.000139335	0.000137113	0.000153314	0.000148505	adenosylhomocysteine nucleosidase [EC:3.2.2.9]
K01246	0.000183022	0.000179399	0.000182498	0.00018348	0.000173666	0.000188168	0.000181014	0.000182115	0.000189677	0.000187526	0.000185477	0.00018672	0.000181766	0.000178477	0.000180711	0.000182716	0.000190359	DNA-3-methyladenine glycosylase I [EC:3.2.2.20]
K01247	0.000235386	0.00021015	0.000245245	0.000246394	0.000201679	0.000273592	0.000233219	0.000227592	0.00027999	0.000248067	0.000245783	0.0002603	0.00024766	0.000216558	0.000231457	0.000246685	0.000257317	DNA-3-methyladenine glycosylase II [EC:3.2.2.21]
K01250	6.17087e-05	7.88393e-05	6.03554e-05	6.45065e-05	6.81791e-05	5.00349e-05	6.87895e-05	7.25647e-05	4.60719e-05	5.92546e-05	6.20658e-05	4.99975e-05	5.40508e-05	6.66595e-05	7.16304e-05	5.84389e-05	5.15431e-05	pyrimidine-specific ribonucleoside hydrolase [EC:3.2.-.-]
K01251	0.000218149	0.000220656	0.00021636	0.000223078	0.000213947	0.000219967	0.000221567	0.000228573	0.000221454	0.000222788	0.000219275	0.000215982	0.000211565	0.000213479	0.000223528	0.00021443	0.000216814	adenosylhomocysteinase [EC:3.3.1.1]
K01252	3.09061e-05	4.68336e-05	3.30684e-05	3.74055e-05	3.35557e-05	3.38994e-05	3.94385e-05	4.0269e-05	2.64949e-05	3.45005e-05	4.16179e-05	2.9092e-05	3.13788e-05	2.92286e-05	4.04027e-05	3.21864e-05	3.58115e-05	bifunctional isochorismate lyase / aryl carrier protein [EC:3.3.2.1 6.3.2.14]
K01253	0.000142106	0.000153111	0.000135792	0.00012735	0.000154853	0.000121202	0.000136398	0.000146585	0.000120893	0.000127302	0.000124966	0.000127028	0.000132408	0.00014752	0.000136916	0.000131045	0.00011904	microsomal epoxide hydrolase [EC:3.3.2.9]
K01255	0.000244746	0.000260202	0.000247516	0.000254301	0.000241003	0.000244987	0.000248598	0.000251568	0.000249133	0.000252687	0.00024854	0.000245364	0.00023375	0.000236515	0.000249488	0.000243	0.000244342	leucyl aminopeptidase [EC:3.4.11.1]
K01256	0.00030801	0.00035365	0.000317965	0.00031543	0.000380092	0.000284193	0.000326106	0.000334744	0.000257924	0.000298665	0.000310108	0.00027661	0.000314238	0.000359276	0.000341185	0.000308068	0.000306966	aminopeptidase N [EC:3.4.11.2]
K01258	7.21209e-07	8.77432e-07	6.50267e-07	5.73625e-07	5.51743e-07	6.62182e-07	8.57681e-07	8.0919e-07	9.37014e-07	9.09163e-07	6.60096e-07	7.68746e-07	5.67491e-07	6.67328e-07	4.89821e-07	6.21174e-07	4.97017e-07	tripeptide aminopeptidase [EC:3.4.11.4]
K01259	0.000288811	0.000357372	0.000278357	0.000287616	0.000350247	0.000241252	0.000293845	0.000305727	0.000221072	0.000275903	0.000280129	0.000247938	0.000272878	0.000324897	0.000308812	0.000274974	0.000262029	proline iminopeptidase [EC:3.4.11.5]
K01262	0.000397994	0.0004239	0.000385586	0.000384742	0.000444322	0.00035407	0.000392001	0.000392797	0.000348707	0.000373827	0.000370183	0.000360721	0.000394191	0.000425743	0.000395612	0.000381747	0.00036915	Xaa-Pro aminopeptidase [EC:3.4.11.9]
K01263	3.78205e-05	4.90505e-05	3.85418e-05	4.21018e-05	6.23571e-05	2.83238e-05	4.23347e-05	4.82241e-05	2.53642e-05	3.63707e-05	3.65035e-05	2.91556e-05	3.70759e-05	5.35829e-05	4.8858e-05	3.72793e-05	3.77885e-05	cytosol alanyl aminopeptidase [EC:3.4.11.14]
K01265	0.000407112	0.000426367	0.000424853	0.000416705	0.000411106	0.000408035	0.000423535	0.000421131	0.000413282	0.000413443	0.000414594	0.000406825	0.000407028	0.000413521	0.000418879	0.00041141	0.000414338	methionyl aminopeptidase [EC:3.4.11.18]
K01266	3.51015e-05	4.68643e-05	3.6063e-05	3.74282e-05	4.10901e-05	2.62279e-05	3.94939e-05	4.13241e-05	2.38119e-05	3.59831e-05	3.52941e-05	2.70282e-05	3.09074e-05	4.20124e-05	4.10742e-05	3.43099e-05	3.56308e-05	D-aminopeptidase [EC:3.4.11.19]
K01267	3.67612e-05	4.50551e-05	3.36662e-05	3.63892e-05	5.82866e-05	2.46572e-05	3.73865e-05	4.02262e-05	2.0213e-05	3.21005e-05	3.14503e-05	2.37525e-05	3.78946e-05	5.5332e-05	4.25827e-05	3.44292e-05	3.71289e-05	aspartyl aminopeptidase [EC:3.4.11.21]
K01270	5.04309e-06	7.28622e-06	7.04596e-06	4.32269e-06	6.79744e-06	1.04774e-05	4.17221e-06	4.79981e-06	4.7672e-06	4.87952e-06	8.7002e-06	8.13189e-06	8.3936e-06	4.18712e-06	4.94188e-06	6.84386e-06	9.34193e-06	dipeptidase D [EC:3.4.13.-]
K01271	0.000106241	0.000136164	0.000110634	0.000113321	0.000110402	9.51507e-05	0.000114242	0.000122029	9.16255e-05	0.000108303	0.000107205	9.58511e-05	9.39433e-05	0.00010627	0.000113347	9.87047e-05	0.000104869	Xaa-Pro dipeptidase [EC:3.4.13.9]
K01273	0.000107241	0.000142049	0.000106282	0.000117456	0.000118637	9.52337e-05	0.000114957	0.000125516	9.90993e-05	0.000113092	0.000106101	0.000102399	9.38533e-05	0.000115283	0.000117163	0.000101848	0.00010336	membrane dipeptidase [EC:3.4.13.19]
K01274	2.86994e-05	4.19702e-05	2.951e-05	3.13199e-05	4.18104e-05	2.01357e-05	3.56228e-05	3.70879e-05	1.58418e-05	2.70819e-05	2.91597e-05	2.04533e-05	2.76808e-05	3.96168e-05	3.83036e-05	2.86882e-05	2.47708e-05	D-alanyl-D-alanine dipeptidase [EC:3.4.13.-]
K01278	9.8365e-05	0.000116573	9.1874e-05	0.000102491	0.000102026	9.14501e-05	9.50575e-05	0.000105028	8.50032e-05	9.45751e-05	9.57109e-05	8.69696e-05	8.855e-05	9.36193e-05	0.0001035	9.35544e-05	9.0763e-05	dipeptidyl-peptidase 4 [EC:3.4.14.5]
K01281	3.90588e-05	5.96225e-05	4.24451e-05	4.17464e-05	5.16188e-05	2.75378e-05	4.67445e-05	4.86255e-05	2.31167e-05	3.81816e-05	4.1708e-05	3.31246e-05	3.51309e-05	5.15803e-05	5.00128e-05	4.04492e-05	3.27146e-05	X-Pro dipeptidyl-peptidase [EC:3.4.14.11]
K01283	1.40463e-05	2.03995e-05	1.424e-05	1.94673e-05	1.64225e-05	1.29265e-05	1.45056e-05	1.77659e-05	1.41215e-05	1.57573e-05	1.44597e-05	1.36192e-05	1.26302e-05	1.44258e-05	1.65363e-05	1.36402e-05	1.61603e-05	peptidyl-dipeptidase A [EC:3.4.15.1]
K01284	0.000303146	0.000249913	0.000269645	0.000270355	0.000259053	0.000300875	0.000257218	0.000263838	0.000294274	0.000278618	0.000284581	0.000296158	0.000287812	0.000242688	0.000256294	0.000284153	0.00028444	peptidyl-dipeptidase Dcp [EC:3.4.15.5]
K01286	0.000411717	0.000581903	0.000438712	0.000429739	0.000557712	0.000348574	0.00045062	0.000484974	0.000284618	0.000398082	0.00042105	0.000363564	0.000410484	0.000525085	0.000489556	0.00041751	0.000397494	D-alanyl-D-alanine carboxypeptidase [EC:3.4.16.4]
K01295	0.000101324	0.000106071	8.50869e-05	9.10684e-05	0.000117392	8.01901e-05	9.18102e-05	9.31546e-05	7.64607e-05	8.99366e-05	8.90547e-05	8.34547e-05	9.2384e-05	0.000104928	9.71713e-05	9.23794e-05	8.03431e-05	glutamate carboxypeptidase [EC:3.4.17.11]
K01297	0.000225219	0.000224289	0.000217055	0.000224588	0.000223932	0.000228001	0.000221794	0.00022576	0.00021634	0.000218485	0.000225586	0.000216334	0.000222374	0.000219192	0.000229883	0.000224957	0.000214217	muramoyltetrapeptide carboxypeptidase [EC:3.4.17.13]
K01299	6.61488e-05	5.71519e-05	5.41179e-05	5.27463e-05	5.82664e-05	5.6212e-05	5.38677e-05	5.61296e-05	6.35669e-05	5.95988e-05	5.48339e-05	6.57959e-05	5.62788e-05	5.40328e-05	4.812e-05	5.33286e-05	4.84108e-05	carboxypeptidase Taq [EC:3.4.17.19]
K01301	4.05102e-08	1.04213e-07	4.85934e-08	6.74697e-08	5.87887e-08	7.67708e-08	5.59778e-08	7.38715e-08	6.43767e-08	4.26008e-08	3.95731e-08	5.3901e-08	3.42981e-08	4.10263e-08	4.36626e-08	6.81162e-08	5.67371e-08	N-acetylated-alpha-linked acidic dipeptidase [EC:3.4.17.21]
K01303	6.95877e-05	0.000102103	7.40142e-05	8.40944e-05	8.46056e-05	6.96853e-05	7.43939e-05	8.30043e-05	5.66264e-05	7.22244e-05	7.5553e-05	6.37212e-05	7.10765e-05	7.42628e-05	8.46693e-05	7.14974e-05	8.08931e-05	acylaminoacyl-peptidase [EC:3.4.19.1]
K01304	0.000147554	0.000122813	0.000138433	0.000147893	0.000121823	0.000161035	0.000137616	0.000137871	0.000160151	0.000144872	0.00014723	0.000149159	0.000147606	0.000125506	0.000139586	0.000146667	0.000146511	pyroglutamyl-peptidase [EC:3.4.19.3]
K01305	6.50618e-07	8.59757e-07	5.15893e-07	1.09864e-06	7.90084e-07	5.72475e-07	6.85612e-07	8.96647e-07	6.48408e-07	7.24307e-07	7.37654e-07	4.59508e-07	6.31397e-07	5.53588e-07	8.03789e-07	4.73345e-07	1.04654e-06	beta-aspartyl-dipeptidase (metallo-type) [EC:3.4.19.-]
K01308	1.91675e-06	1.36751e-06	2.68129e-06	1.89843e-06	2.11194e-06	2.7669e-06	2.85454e-06	2.25135e-06	3.06711e-06	3.18447e-06	1.64413e-06	2.40014e-06	1.25375e-06	1.76599e-06	1.42078e-06	1.60848e-06	2.38268e-06	g-D-glutamyl-meso-diaminopimelate peptidase [EC:3.4.19.11]
K01312	9.10158e-05	0.000136271	9.91937e-05	9.96484e-05	0.000114315	6.79222e-05	0.000114513	0.000113118	5.7193e-05	9.07423e-05	0.000101225	7.02341e-05	8.24138e-05	0.000110316	0.000117523	9.14108e-05	7.95161e-05	trypsin [EC:3.4.21.4]
K01318	4.6744e-05	5.32373e-05	4.18706e-05	5.4869e-05	3.96802e-05	4.22402e-05	4.53624e-05	5.29487e-05	4.24143e-05	4.58244e-05	4.48954e-05	3.80172e-05	3.85625e-05	3.72437e-05	4.97023e-05	4.11059e-05	4.54825e-05	glutamyl endopeptidase [EC:3.4.21.19]
K01322	0.00013758	0.000133107	0.000126867	0.000124271	0.000110162	0.000141637	0.000121894	0.000126225	0.000140686	0.000131445	0.00013124	0.000135493	0.000125317	0.000102793	0.000118177	0.000127413	0.000132192	prolyl oligopeptidase [EC:3.4.21.26]
K01337	0.000105821	0.000149872	0.0001022	0.000135012	0.000104851	9.47136e-05	0.000104992	0.000129899	9.08579e-05	0.00011385	0.000110235	9.54397e-05	9.17379e-05	0.000101018	0.000121724	0.000101515	0.000115317	lysyl endopeptidase [EC:3.4.21.50]
K01338	0.00032357	0.000322288	0.000337139	0.000330907	0.000309068	0.000340346	0.000333482	0.000325098	0.000361499	0.000344429	0.000330869	0.000351957	0.000325085	0.000319844	0.000317318	0.000326433	0.000333147	ATP-dependent Lon protease [EC:3.4.21.53]
K01342	0.000320738	0.000437795	0.000323656	0.000326223	0.000433259	0.000229196	0.000351971	0.000354302	0.000188288	0.00029038	0.000317742	0.000241794	0.000304351	0.000403041	0.000378284	0.000317344	0.000274029	subtilisin [EC:3.4.21.62]
K01354	5.50649e-05	6.51441e-05	5.67533e-05	5.61532e-05	4.60605e-05	5.89758e-05	5.32419e-05	5.6775e-05	6.19456e-05	5.99537e-05	5.49521e-05	5.99818e-05	4.91968e-05	4.52118e-05	4.97473e-05	4.97409e-05	5.92e-05	oligopeptidase B [EC:3.4.21.83]
K01355	9.55525e-06	1.59438e-05	1.40572e-05	9.10444e-06	8.99304e-06	9.12764e-06	1.28891e-05	1.06884e-05	1.56335e-05	1.27106e-05	8.41702e-06	1.52667e-05	8.94494e-06	1.10341e-05	6.88013e-06	7.51866e-06	7.39096e-06	omptin [EC:3.4.23.49]
K01356	0.000285024	0.000309816	0.000312147	0.000343568	0.000296742	0.000326309	0.00032577	0.000325695	0.00032212	0.000323398	0.000326676	0.000306312	0.000306532	0.000321719	0.00034562	0.00031944	0.000330051	repressor LexA [EC:3.4.21.88]
K01358	0.000359791	0.000388596	0.000373127	0.000378304	0.000382471	0.000368582	0.000378808	0.000379683	0.000354703	0.000369388	0.000378428	0.000361727	0.000362327	0.000377575	0.000386008	0.000368123	0.000366085	ATP-dependent Clp protease, protease subunit [EC:3.4.21.92]
K01361	0.000164732	0.000207337	0.000158177	0.00016724	0.000204516	0.000122577	0.000172911	0.00018213	0.000108474	0.000152438	0.00016161	0.000129061	0.00014905	0.000187063	0.000185012	0.000155817	0.000144008	lactocepin [EC:3.4.21.96]
K01372	4.15519e-06	5.44129e-06	3.6713e-06	4.64086e-06	7.29415e-06	3.00618e-06	5.20593e-06	7.97246e-06	2.19732e-06	4.30545e-06	4.0809e-06	3.08023e-06	3.6759e-06	6.56551e-06	6.93435e-06	4.15599e-06	3.86443e-06	bleomycin hydrolase [EC:3.4.22.40]
K01387	8.97817e-05	0.000126266	8.92706e-05	0.000104168	0.00010728	7.62706e-05	8.58743e-05	9.74927e-05	6.52567e-05	8.63262e-05	8.87578e-05	7.61233e-05	8.75213e-05	0.000100912	9.99398e-05	8.869e-05	9.40616e-05	microbial collagenase [EC:3.4.24.3]
K01392	8.54729e-05	5.65884e-05	6.57363e-05	6.14104e-05	6.86981e-05	7.1926e-05	6.15392e-05	6.28325e-05	7.84006e-05	6.81018e-05	6.55647e-05	7.80074e-05	7.54244e-05	6.1285e-05	5.58339e-05	7.12985e-05	6.52009e-05	thimet oligopeptidase [EC:3.4.24.15]
K01399	2.66653e-05	2.40526e-05	2.21443e-05	2.85446e-05	2.06304e-05	2.60984e-05	2.30443e-05	2.75388e-05	2.69924e-05	2.55619e-05	2.41546e-05	2.28533e-05	2.2903e-05	1.91593e-05	2.4492e-05	2.16549e-05	2.44311e-05	pseudolysin [EC:3.4.24.26]
K01400	0.000134543	0.00017303	0.000135964	0.000138705	0.000226893	9.37699e-05	0.000144209	0.000160541	6.83387e-05	0.000113289	0.000117422	8.52635e-05	0.000139529	0.000199948	0.000168147	0.000129855	0.0001276	bacillolysin [EC:3.4.24.28]
K01401	1.67144e-05	2.21964e-05	1.58388e-05	1.73012e-05	3.04913e-05	1.02477e-05	1.8683e-05	2.06327e-05	7.3242e-06	1.36982e-05	1.35788e-05	9.63895e-06	1.79698e-05	2.77503e-05	2.20567e-05	1.62712e-05	1.44981e-05	aureolysin [EC:3.4.24.29]
K01406	0.000357757	0.000310677	0.000313684	0.000262252	0.000318252	0.000373081	0.000262033	0.000277949	0.000292846	0.000302895	0.000349283	0.000366362	0.000358002	0.00025644	0.000262924	0.000330072	0.000344959	serralysin [EC:3.4.24.40]
K01409	0.000202279	0.000213337	0.000206767	0.000209787	0.000201644	0.00020417	0.000210218	0.000212412	0.000205087	0.000209721	0.000208558	0.000204946	0.000198481	0.000202399	0.000210887	0.000203973	0.000204949	N6-L-threonylcarbamoyladenine synthase [EC:2.3.1.234]
K01414	0.000231197	0.000170877	0.000201686	0.000204704	0.000184378	0.00023203	0.000191808	0.000196954	0.00023853	0.000212051	0.000208605	0.000227073	0.00021999	0.000183556	0.000188371	0.000214689	0.000214347	oligopeptidase A [EC:3.4.24.70]
K01415	4.78113e-05	4.12403e-05	4.02795e-05	4.57491e-05	3.46283e-05	5.06886e-05	3.68322e-05	4.4163e-05	4.69749e-05	4.20236e-05	4.28812e-05	4.22542e-05	4.13251e-05	3.14799e-05	3.96374e-05	4.02596e-05	4.38155e-05	endothelin-converting enzyme [EC:3.4.24.71]
K01416	4.11982e-05	6.28913e-05	4.43041e-05	4.57591e-05	5.35148e-05	3.02443e-05	5.2656e-05	5.36462e-05	2.51102e-05	4.14252e-05	4.55781e-05	3.27237e-05	3.75732e-05	5.30101e-05	5.51633e-05	4.17581e-05	3.56637e-05	snapalysin [EC:3.4.24.77]
K01417	5.55246e-07	1.26511e-06	1.48077e-06	1.13739e-06	1.14257e-06	6.43629e-07	1.24118e-06	1.22157e-06	7.46992e-07	9.92806e-07	1.4351e-06	1.06399e-06	6.63811e-07	8.07013e-07	1.22728e-06	6.31437e-07	1.06949e-06	extracellular elastinolytic metalloproteinase [EC:3.4.24.-]
K01419	0.000132203	0.000126187	0.000137534	0.000137323	0.000118872	0.000148009	0.00013224	0.000129189	0.000154719	0.000143137	0.000138147	0.00015033	0.000138357	0.000125278	0.000128579	0.000137755	0.000145266	ATP-dependent HslUV protease, peptidase subunit HslV [EC:3.4.25.2]
K01420	0.000347899	0.00029471	0.000334481	0.000327728	0.000297319	0.000364842	0.00032074	0.000313927	0.000384467	0.000346001	0.000332822	0.000370852	0.0003478	0.0003029	0.000305886	0.000340307	0.000341798	CRP/FNR family transcriptional regulator, anaerobic regulatory protein
K01421	3.94862e-05	5.12789e-05	4.38816e-05	4.01457e-05	5.79395e-05	2.80918e-05	4.56127e-05	4.56937e-05	2.28798e-05	3.56563e-05	3.9129e-05	2.68724e-05	3.55956e-05	5.00064e-05	4.73607e-05	3.76708e-05	3.58979e-05	putative membrane protein
K01423	0.000237436	0.000211832	0.00023438	0.00025469	0.000209294	0.000265428	0.00023271	0.000236236	0.000270835	0.000251031	0.000247166	0.000256009	0.000241865	0.000221848	0.00023808	0.000243081	0.000251213	beta-barrel assembly-enhancing protease [EC:3.4.-.-]
K01424	0.000265313	0.000242522	0.000274321	0.000269011	0.000237936	0.000291138	0.000261107	0.000258113	0.000300178	0.000274857	0.000272544	0.000293135	0.000274468	0.000249135	0.000254453	0.000271442	0.000277812	L-asparaginase [EC:3.5.1.1]
K01425	6.2903e-05	7.63704e-05	7.44936e-05	8.97208e-05	7.80848e-05	7.89014e-05	8.17731e-05	8.30783e-05	7.53397e-05	7.96648e-05	8.1876e-05	7.14943e-05	7.48668e-05	8.90234e-05	9.28195e-05	7.93574e-05	8.48331e-05	glutaminase [EC:3.5.1.2]
K01426	0.000862362	0.000856565	0.000929924	0.000911747	0.000887197	0.000902734	0.000919334	0.000868665	0.000954985	0.00089838	0.000874925	0.000904485	0.000925237	0.000946507	0.000903244	0.000917392	0.000912204	amidase [EC:3.5.1.4]
K01428	0.000231503	0.000236704	0.000225019	0.000231073	0.000252281	0.000219022	0.000231247	0.000235089	0.000214915	0.000222613	0.000219961	0.000213537	0.000232837	0.000251775	0.000236866	0.000224805	0.000221822	urease subunit alpha [EC:3.5.1.5]
K01429	0.000172504	0.000168661	0.000172402	0.000171863	0.000172497	0.000173661	0.000173693	0.00017017	0.000173536	0.000171314	0.000171088	0.000171559	0.000176315	0.000177485	0.00017175	0.00017187	0.000171978	urease subunit beta [EC:3.5.1.5]
K01430	0.000188587	0.000189959	0.000187279	0.000188049	0.000202309	0.000183106	0.000190977	0.000189227	0.000180285	0.000184247	0.00018397	0.000180473	0.000193733	0.000204579	0.000192818	0.000187582	0.000185631	urease subunit gamma [EC:3.5.1.5]
K01431	3.38383e-05	4.87742e-05	3.40456e-05	3.74452e-05	5.07806e-05	2.40219e-05	4.21476e-05	4.64373e-05	1.87984e-05	3.25253e-05	3.44361e-05	2.42971e-05	3.20475e-05	4.72497e-05	4.68857e-05	3.41271e-05	2.98287e-05	beta-ureidopropionase [EC:3.5.1.6]
K01432	0.000125814	0.000124368	0.000136103	0.000127673	0.000116379	0.00014411	0.000131932	0.000120741	0.00015581	0.000138987	0.000130501	0.000152025	0.000135338	0.000122964	0.00012129	0.000132017	0.000131538	arylformamidase [EC:3.5.1.9]
K01433	0.000180011	0.000175575	0.000182757	0.000179378	0.000170935	0.000185488	0.000180852	0.000180477	0.000188312	0.000185781	0.00018211	0.000184958	0.00017801	0.000176661	0.000176184	0.000178657	0.000186639	formyltetrahydrofolate deformylase [EC:3.5.1.10]
K01434	0.000229076	0.000219731	0.000218604	0.000230793	0.0002476	0.000219812	0.000220618	0.000232926	0.000210983	0.000220184	0.000219151	0.000207012	0.000225379	0.000240229	0.000233388	0.000223146	0.000232684	penicillin amidase [EC:3.5.1.11]
K01436	0.000386125	0.000385437	0.000400323	0.000410553	0.000367162	0.000402236	0.000405933	0.000397929	0.000415767	0.000413456	0.000406925	0.000407989	0.000384608	0.000388337	0.000403755	0.000402864	0.000405958	amidohydrolase [EC:3.5.1.-]
K01438	0.000176659	0.000229012	0.000206479	0.000235292	0.00020378	0.000197699	0.0002213	0.000222569	0.000192727	0.000212963	0.000213056	0.000187881	0.000191569	0.000230281	0.000240536	0.000207817	0.000220025	acetylornithine deacetylase [EC:3.5.1.16]
K01439	0.000479361	0.000472094	0.000468485	0.000466468	0.000478285	0.000460516	0.000472467	0.000471403	0.000462327	0.000470008	0.000465415	0.000464557	0.000467622	0.000474205	0.000467554	0.000468124	0.000468585	succinyl-diaminopimelate desuccinylase [EC:3.5.1.18]
K01442	3.46831e-05	2.2982e-05	3.14981e-05	2.49693e-05	2.37356e-05	3.02954e-05	2.60554e-05	2.4222e-05	3.62069e-05	2.73847e-05	2.46375e-05	3.29944e-05	3.34182e-05	2.33289e-05	2.01997e-05	3.03404e-05	3.0462e-05	choloylglycine hydrolase [EC:3.5.1.24]
K01443	0.000146733	0.000174273	0.000141705	0.000140991	0.0001587	0.000127494	0.000142951	0.000151198	0.000124206	0.000142231	0.000144067	0.000142409	0.000131491	0.00014602	0.00014377	0.00013782	0.000127431	N-acetylglucosamine-6-phosphate deacetylase [EC:3.5.1.25]
K01444	9.9105e-06	1.43785e-05	9.14008e-06	1.34105e-05	1.23152e-05	1.01005e-05	1.0293e-05	1.22129e-05	1.03634e-05	1.2363e-05	1.09181e-05	1.06435e-05	9.96383e-06	1.10649e-05	1.19528e-05	1.02272e-05	1.16027e-05	N4-(beta-N-acetylglucosaminyl)-L-asparaginase [EC:3.5.1.26]
K01446	2.92302e-05	3.44369e-05	3.1667e-05	2.86082e-05	5.04812e-05	2.06881e-05	3.12805e-05	3.23298e-05	1.69337e-05	2.47919e-05	2.60496e-05	1.89855e-05	2.84104e-05	4.13919e-05	3.36649e-05	2.73977e-05	2.79372e-05	peptidoglycan recognition protein
K01447	5.96459e-05	7.70225e-05	7.24957e-05	9.47446e-05	6.3189e-05	8.32213e-05	7.83904e-05	7.88633e-05	8.3362e-05	8.25743e-05	7.94856e-05	7.33604e-05	6.956e-05	7.26969e-05	8.9125e-05	7.72331e-05	8.39353e-05	N-acetylmuramoyl-L-alanine amidase [EC:3.5.1.28]
K01448	0.000286273	0.000327192	0.000303652	0.000325167	0.000313209	0.000299252	0.000315265	0.000321407	0.00030037	0.000309815	0.000303557	0.000299305	0.000297348	0.00032555	0.000327958	0.000303459	0.000304334	N-acetylmuramoyl-L-alanine amidase [EC:3.5.1.28]
K01449	4.54752e-05	6.53785e-05	4.8145e-05	4.59653e-05	7.20868e-05	3.44396e-05	5.23394e-05	5.02392e-05	3.76858e-05	4.49797e-05	3.9019e-05	4.1159e-05	4.83566e-05	6.8326e-05	5.20011e-05	4.36982e-05	4.01436e-05	N-acetylmuramoyl-L-alanine amidase [EC:3.5.1.28]
K01451	0.000333809	0.000309575	0.000340876	0.000355809	0.000299471	0.00036313	0.000346214	0.000337778	0.000374174	0.000361447	0.000357198	0.000360253	0.000337589	0.000323981	0.00034584	0.00035293	0.000359849	hippurate hydrolase [EC:3.5.1.32]
K01452	0.000131046	0.000110118	0.000131357	0.000127407	0.000107727	0.000145537	0.000124621	0.000121528	0.000151679	0.000134369	0.000131133	0.00014426	0.000133492	0.000116775	0.000118546	0.000131512	0.000136014	chitin deacetylase [EC:3.5.1.41]
K01455	0.00010241	8.04527e-05	0.000110213	0.000105326	8.75169e-05	0.000116626	0.000105507	0.000101315	0.000126171	0.00010729	0.000104776	0.000112907	0.000111936	9.79892e-05	0.000101607	0.000110705	0.0001182	formamidase [EC:3.5.1.49]
K01457	0.000206818	0.00016707	0.000214916	0.000208589	0.000172646	0.000231014	0.000206221	0.000194165	0.000252832	0.000216685	0.000209162	0.000232003	0.000221249	0.000195701	0.000194952	0.000218138	0.000227735	allophanate hydrolase [EC:3.5.1.54]
K01458	0.000107839	0.00010723	0.000112258	0.00012215	0.000100768	0.000126083	0.000110912	0.000115119	0.000126036	0.000119526	0.000118534	0.000122132	0.000113175	0.000106886	0.000115915	0.000114235	0.0001151	N-formylglutamate deformylase [EC:3.5.1.68]
K01459	2.03622e-07	2.05148e-07	3.14973e-07	3.38598e-07	1.64572e-07	2.88115e-07	2.87522e-07	3.75584e-07	2.58586e-07	4.34147e-07	2.18178e-07	2.6355e-07	2.19365e-07	3.3228e-07	2.48755e-07	2.54452e-07	2.51272e-07	N-carbamoyl-D-amino-acid hydrolase [EC:3.5.1.77]
K01461	2.92252e-07	8.01903e-07	6.88259e-07	4.79895e-07	2.11476e-07	3.63146e-07	6.14738e-07	7.78623e-07	3.34648e-07	5.15885e-07	3.59169e-07	7.35537e-07	2.58522e-07	7.25774e-07	4.61186e-07	2.57479e-07	3.87231e-07	N-acyl-D-glutamate deacylase [EC:3.5.1.82]
K01462	0.000376982	0.000384312	0.000389622	0.000384573	0.000385544	0.000383536	0.000390315	0.000392516	0.000390661	0.000387175	0.000380234	0.000387339	0.00037576	0.000383849	0.000384866	0.000376196	0.000377737	peptide deformylase [EC:3.5.1.88]
K01463	8.09354e-05	6.00154e-05	6.48545e-05	6.93332e-05	5.67948e-05	7.68863e-05	6.2002e-05	6.95329e-05	8.03974e-05	6.91786e-05	6.61295e-05	6.8104e-05	6.24225e-05	5.44093e-05	6.15634e-05	6.39492e-05	5.95676e-05	N-acetylglucosamine malate deacetylase 1 [EC:3.5.1.-]
K01464	0.000127708	0.000146628	0.000144603	0.000141267	0.000138472	0.00013641	0.000146943	0.000139173	0.000135454	0.000137834	0.000138581	0.000133293	0.00013832	0.000148269	0.000145482	0.00014018	0.000141287	dihydropyrimidinase [EC:3.5.2.2]
K01465	0.000449659	0.000468914	0.000453987	0.000457137	0.000445688	0.00044016	0.00046462	0.000462083	0.00045203	0.000457869	0.000450511	0.000446066	0.000439376	0.000447415	0.000457907	0.000447347	0.000442918	dihydroorotase [EC:3.5.2.3]
K01466	8.48609e-05	9.77568e-05	9.0412e-05	7.6247e-05	9.18749e-05	6.91417e-05	9.0062e-05	8.50479e-05	7.68541e-05	7.95876e-05	7.73996e-05	8.04557e-05	7.97318e-05	8.86609e-05	7.94799e-05	7.93747e-05	7.31394e-05	allantoinase [EC:3.5.2.5]
K01467	6.41922e-05	6.98605e-05	5.86943e-05	6.88095e-05	5.57063e-05	6.33537e-05	6.08671e-05	7.42161e-05	5.79523e-05	6.66195e-05	6.64887e-05	5.80018e-05	5.4794e-05	5.4573e-05	6.58915e-05	5.81274e-05	7.45221e-05	beta-lactamase class C [EC:3.5.2.6]
K01468	0.000182956	0.000217537	0.000172596	0.000183626	0.00020882	0.000157515	0.000179894	0.000190298	0.000136948	0.000172018	0.000179648	0.000153317	0.000171039	0.000188201	0.000193474	0.000174217	0.000174787	imidazolonepropionase [EC:3.5.2.7]
K01469	0.000136698	0.000118117	0.000134366	0.000136537	0.000132143	0.000147624	0.000132725	0.000131369	0.000144724	0.000135352	0.000135609	0.000139241	0.000143168	0.00013423	0.000133963	0.00013942	0.000138136	5-oxoprolinase (ATP-hydrolysing) [EC:3.5.2.9]
K01470	0.000105198	0.000131425	0.000138368	0.000157932	0.000127947	0.000150781	0.000151665	0.000148647	0.000153617	0.000147767	0.000145637	0.000140066	0.000127799	0.000146477	0.000162126	0.000140229	0.000143579	creatinine amidohydrolase [EC:3.5.2.10]
K01473	0.000145776	0.00013288	0.000140968	0.000149989	0.00013901	0.000150694	0.000149847	0.000143773	0.000152909	0.00014726	0.000146489	0.00014242	0.000147406	0.000142458	0.000148615	0.000147324	0.000142953	N-methylhydantoinase A [EC:3.5.2.14]
K01474	0.000148484	0.000136662	0.000145388	0.000151871	0.00014736	0.000158885	0.000149868	0.000147478	0.000155295	0.000149131	0.000151246	0.000149517	0.000154043	0.000147246	0.0001509	0.000151841	0.000150542	N-methylhydantoinase B [EC:3.5.2.14]
K01476	0.000144101	0.000134304	0.000145425	0.000152674	0.000126247	0.000152726	0.000145562	0.000145023	0.000164061	0.000150981	0.000144084	0.000154812	0.000143895	0.000134931	0.000141467	0.000143166	0.000145266	arginase [EC:3.5.3.1]
K01477	4.66598e-05	6.20197e-05	4.50362e-05	4.67899e-05	6.56575e-05	3.09978e-05	5.1108e-05	5.28904e-05	2.55821e-05	4.2366e-05	4.32236e-05	3.12338e-05	4.40455e-05	6.40616e-05	5.56457e-05	4.48308e-05	4.40962e-05	allantoicase [EC:3.5.3.4]
K01478	0.000100196	0.000106132	0.000111981	0.00011748	0.000114153	0.000109032	0.00011882	0.000117701	0.00010701	0.00010768	0.000111764	0.000100954	0.000111139	0.000119522	0.00012488	0.000112791	0.000111961	arginine deiminase [EC:3.5.3.6]
K01479	0.000107054	0.000101438	0.000104514	0.000121689	9.68456e-05	0.000125494	0.000105577	0.000111618	0.000119433	0.000116954	0.000119638	0.000115607	0.000110791	0.000102644	0.000116199	0.000114001	0.000121305	formiminoglutamase [EC:3.5.3.8]
K01480	6.35565e-05	7.64719e-05	7.71121e-05	8.98196e-05	7.6054e-05	7.97368e-05	8.41918e-05	8.50849e-05	7.66229e-05	8.16533e-05	8.22941e-05	7.0799e-05	7.33788e-05	8.7071e-05	9.3058e-05	8.05165e-05	8.50567e-05	agmatinase [EC:3.5.3.11]
K01481	7.27049e-06	1.1294e-05	8.14537e-06	7.77669e-06	6.8097e-06	5.83511e-06	7.69797e-06	8.49246e-06	5.25521e-06	7.38825e-06	7.96191e-06	7.67304e-06	5.59669e-06	7.22691e-06	7.99382e-06	7.90638e-06	5.95686e-06	protein-arginine deiminase [EC:3.5.3.15]
K01482	5.38361e-06	6.88949e-06	5.17069e-06	6.1389e-06	8.65224e-06	4.20919e-06	7.18765e-06	1.02301e-05	3.47582e-06	5.72014e-06	5.21041e-06	4.16969e-06	4.79017e-06	7.65609e-06	8.49019e-06	5.0337e-06	5.07542e-06	dimethylargininase [EC:3.5.3.18]
K01483	4.70153e-05	3.73558e-05	4.78952e-05	3.30497e-05	3.16314e-05	4.21448e-05	4.09782e-05	3.63927e-05	5.5743e-05	4.47957e-05	3.49552e-05	5.12262e-05	4.20963e-05	3.5617e-05	2.6238e-05	3.92513e-05	4.40115e-05	ureidoglycolate lyase [EC:4.3.2.3]
K01484	1.42689e-05	1.75029e-05	1.33784e-05	1.39769e-05	1.25359e-05	1.54119e-05	1.38313e-05	1.47033e-05	1.71174e-05	1.85117e-05	1.56101e-05	1.6824e-05	1.21197e-05	1.3617e-05	1.33559e-05	1.39628e-05	1.91761e-05	succinylarginine dihydrolase [EC:3.5.3.23]
K01485	0.000234722	0.000258405	0.000255491	0.000262298	0.000245471	0.000254328	0.000260266	0.000253845	0.000249428	0.000254967	0.000255997	0.000246827	0.000251	0.000264817	0.00026371	0.000252558	0.000267536	cytosine deaminase [EC:3.5.4.1]
K01486	2.23945e-05	3.10822e-05	2.80635e-05	2.26411e-05	2.62227e-05	2.08696e-05	2.62627e-05	2.4277e-05	2.80215e-05	2.6095e-05	2.16772e-05	2.72307e-05	2.08119e-05	2.49784e-05	1.96711e-05	1.94092e-05	2.13149e-05	adenine deaminase [EC:3.5.4.2]
K01487	0.00021323	0.000197497	0.000214396	0.000204782	0.000197417	0.000213723	0.000204433	0.000203145	0.000222397	0.000209837	0.000203981	0.00021532	0.000210564	0.000199126	0.000196377	0.000208849	0.000212216	guanine deaminase [EC:3.5.4.3]
K01488	0.00021762	0.000267349	0.000230664	0.000235533	0.000294644	0.000201833	0.000242538	0.000248357	0.00017028	0.000215856	0.000231777	0.000193278	0.000227123	0.000276449	0.000266088	0.000230155	0.000220285	adenosine deaminase [EC:3.5.4.4]
K01489	0.000116796	0.000122464	0.000112761	0.000103053	0.00012976	9.98696e-05	0.000109864	0.000111861	9.62633e-05	0.000106439	0.00010825	0.000104343	0.000104843	0.000113462	0.000105546	0.000102416	9.96302e-05	cytidine deaminase [EC:3.5.4.5]
K01491	0.000263159	0.000282911	0.000295683	0.000319471	0.000268926	0.000312813	0.00030647	0.000299905	0.000310168	0.000303282	0.000308721	0.000293053	0.000286858	0.000292157	0.000319842	0.00029916	0.000306327	methylenetetrahydrofolate dehydrogenase (NADP+) / methenyltetrahydrofolate cyclohydrolase [EC:1.5.1.5 3.5.4.9]
K01492	2.53928e-06	3.66584e-06	2.36362e-06	3.23987e-06	4.76923e-06	2.89204e-06	3.10371e-06	3.27709e-06	3.18776e-06	3.18623e-06	3.20284e-06	3.41272e-06	2.8133e-06	3.93901e-06	3.12952e-06	2.82273e-06	3.06144e-06	phosphoribosylglycinamide/phosphoribosylaminoimidazolecarboxamide formyltransferase [EC:2.1.2.2 2.1.2.3]
K01493	4.83747e-05	2.93556e-05	4.0655e-05	3.45061e-05	3.34325e-05	4.44446e-05	3.54885e-05	3.43502e-05	5.19885e-05	3.84553e-05	3.51797e-05	4.54817e-05	4.4332e-05	3.22177e-05	2.89634e-05	4.06401e-05	3.88487e-05	dCMP deaminase [EC:3.5.4.12]
K01494	0.000138747	0.000160008	0.000149616	0.000158308	0.000151986	0.000148758	0.000155086	0.000156392	0.000144107	0.000154968	0.000154999	0.000147314	0.000142676	0.000153486	0.000159918	0.000147224	0.00015344	dCTP deaminase [EC:3.5.4.13]
K01495	0.0002137	0.00022014	0.000218594	0.000216256	0.000218212	0.000210781	0.000214746	0.000215201	0.000211405	0.000217043	0.000214258	0.000210951	0.000210344	0.000218503	0.0002148	0.000211746	0.000219879	GTP cyclohydrolase IA [EC:3.5.4.16]
K01496	0.000183399	0.000179427	0.00018545	0.000184513	0.000174469	0.000187405	0.000182625	0.000183504	0.000190228	0.00018827	0.000184798	0.000186639	0.000180417	0.000178803	0.000180448	0.000182259	0.000190628	phosphoribosyl-AMP cyclohydrolase [EC:3.5.4.19]
K01497	0.000111879	0.000120636	0.000117044	0.000103131	0.000101689	0.000107069	0.000116663	0.000117729	0.000117084	0.000113104	0.000106142	0.000113509	0.000102242	9.87465e-05	9.97197e-05	9.85581e-05	0.000106745	GTP cyclohydrolase II [EC:3.5.4.25]
K01499	1.7683e-08	5.23874e-07	9.15543e-07	2.7054e-07	4.37921e-07	1.00846e-07	4.93113e-07	3.84217e-07	2.71936e-07	2.99764e-07	7.48447e-07	5.35881e-07	3.46268e-07	1.89177e-07	3.71496e-07	3.56475e-08	4.41131e-07	methenyltetrahydromethanopterin cyclohydrolase [EC:3.5.4.27]
K01501	2.50582e-05	2.42945e-05	2.18371e-05	2.31323e-05	1.79003e-05	2.35132e-05	2.13397e-05	2.33348e-05	2.48529e-05	2.34625e-05	2.25892e-05	2.34171e-05	1.89245e-05	1.89954e-05	2.05489e-05	2.12292e-05	1.84085e-05	nitrilase [EC:3.5.5.1]
K01502	3.43442e-05	2.35832e-05	3.21053e-05	2.24734e-05	2.43318e-05	2.90921e-05	2.63416e-05	2.29962e-05	3.485e-05	2.7015e-05	2.52765e-05	3.38214e-05	3.22916e-05	2.3646e-05	1.98447e-05	3.14384e-05	2.78334e-05	aliphatic nitrilase [EC:3.5.5.7]
K01505	6.82209e-05	9.26904e-05	6.82065e-05	6.86065e-05	9.82427e-05	4.82722e-05	7.46768e-05	7.5499e-05	4.06073e-05	6.35856e-05	6.4004e-05	4.9889e-05	6.70638e-05	9.46035e-05	8.18052e-05	6.81735e-05	6.33283e-05	1-aminocyclopropane-1-carboxylate deaminase [EC:3.5.99.7]
K01507	0.000185309	0.000187058	0.000188818	0.000190287	0.00018167	0.000190697	0.000187561	0.000187523	0.000193631	0.000191208	0.000187987	0.000190385	0.000184649	0.000183124	0.000186538	0.000186065	0.000189979	inorganic pyrophosphatase [EC:3.6.1.1]
K01512	8.40099e-05	8.49038e-05	7.24418e-05	7.8264e-05	9.44251e-05	6.44092e-05	7.62746e-05	8.51758e-05	5.97675e-05	7.64808e-05	7.63192e-05	6.72042e-05	7.4238e-05	8.46424e-05	8.17251e-05	7.37931e-05	7.703e-05	acylphosphatase [EC:3.6.1.7]
K01515	0.000500742	0.000488593	0.000447083	0.000457382	0.000491772	0.000446706	0.000467637	0.000477809	0.000436762	0.000464928	0.00047206	0.000462465	0.000462612	0.000461513	0.000466769	0.000465861	0.000438739	ADP-ribose pyrophosphatase [EC:3.6.1.13]
K01520	0.000231981	0.000228622	0.000223381	0.000227034	0.000225081	0.000225988	0.000224169	0.000226779	0.000226902	0.000230546	0.000229021	0.000231048	0.000223437	0.000220671	0.000224334	0.000226596	0.000223876	dUTP pyrophosphatase [EC:3.6.1.23]
K01521	1.52524e-06	2.6877e-06	1.51081e-06	2.53937e-06	2.62589e-06	1.7829e-06	2.26761e-06	2.57277e-06	1.62301e-06	2.51396e-06	1.88316e-06	1.67002e-06	1.74149e-06	1.82762e-06	2.63831e-06	1.82347e-06	2.00897e-06	CDP-diacylglycerol pyrophosphatase [EC:3.6.1.26]
K01523	0.000178157	0.000176918	0.000181449	0.000180021	0.000174786	0.000184457	0.000180466	0.000178362	0.000187531	0.000183437	0.000180911	0.000183871	0.000178916	0.000175933	0.000177848	0.000179043	0.000181979	phosphoribosyl-ATP pyrophosphohydrolase [EC:3.6.1.31]
K01524	0.000262277	0.000301434	0.000273828	0.000271795	0.000283725	0.000255026	0.000282291	0.000282238	0.000260037	0.000274133	0.000270364	0.00026568	0.000255465	0.00027823	0.000278679	0.000263836	0.000258597	exopolyphosphatase / guanosine-5-triphosphate,3-diphosphate pyrophosphatase [EC:3.6.1.11 3.6.1.40]
K01525	0.000136047	0.000115453	0.000133079	0.000139859	0.000117845	0.000150893	0.000128039	0.000130969	0.000151017	0.000139435	0.000140259	0.000145377	0.000139548	0.000122927	0.000130973	0.000138628	0.000147219	bis(5-nucleosyl)-tetraphosphatase (symmetrical) [EC:3.6.1.41]
K01531	0.000101537	0.000121641	0.000142457	0.000178276	0.000121822	0.000166557	0.000155673	0.00014713	0.00015988	0.000149269	0.000159511	0.000137732	0.000145309	0.000156057	0.00018182	0.000154356	0.000160288	Mg2+-importing ATPase [EC:3.6.3.2]
K01533	0.000738781	0.000723638	0.000781981	0.000813977	0.000734063	0.000826354	0.000786248	0.000765104	0.000838508	0.000802213	0.000799906	0.00080991	0.000783806	0.000772704	0.000795904	0.000789357	0.000796211	Cu2+-exporting ATPase [EC:3.6.3.4]
K01534	0.000616226	0.000609702	0.000652164	0.000684704	0.000610731	0.000698129	0.000663812	0.000647263	0.000700268	0.000672876	0.000678311	0.000678332	0.000662581	0.000643653	0.000679855	0.000670471	0.000670196	Cd2+/Zn2+-exporting ATPase [EC:3.6.3.3 3.6.3.5]
K01535	6.61784e-05	5.77652e-05	7.63585e-05	8.04746e-05	6.25577e-05	8.67524e-05	7.76326e-05	7.28797e-05	9.17502e-05	7.78539e-05	7.7182e-05	7.97672e-05	7.94698e-05	7.2782e-05	7.78799e-05	7.92158e-05	8.17204e-05	H+-transporting ATPase [EC:3.6.3.6]
K01537	0.000269314	0.000274756	0.000291845	0.000310483	0.00028946	0.000311846	0.000297002	0.000299103	0.000302143	0.000302588	0.000310751	0.000304901	0.000295046	0.000303567	0.000313554	0.000296483	0.000304741	Ca2+-transporting ATPase [EC:3.6.3.8]
K01539	3.8551e-05	2.90258e-05	2.70602e-05	2.8686e-05	3.51975e-05	2.82623e-05	2.72536e-05	3.05314e-05	2.73912e-05	3.09365e-05	3.08936e-05	3.41111e-05	3.22916e-05	3.07348e-05	2.83038e-05	3.16324e-05	2.77853e-05	sodium/potassium-transporting ATPase subunit alpha [EC:3.6.3.9]
K01545	1.84123e-05	1.23676e-05	1.40891e-05	1.632e-05	1.15803e-05	1.89013e-05	1.39707e-05	1.62247e-05	1.97493e-05	1.62238e-05	1.56368e-05	1.59061e-05	1.52321e-05	1.15318e-05	1.38914e-05	1.38669e-05	1.39576e-05	K+-transporting ATPase ATPase F chain
K01546	0.000168521	0.000163887	0.000172381	0.000169153	0.000163224	0.000173944	0.000168166	0.000162845	0.000174343	0.000165643	0.000166783	0.000166453	0.000177025	0.000169765	0.000169792	0.000175756	0.000175684	K+-transporting ATPase ATPase A chain [EC:3.6.3.12]
K01547	0.000142956	0.000153662	0.000149628	0.000156609	0.000150092	0.000152822	0.000152262	0.000150836	0.000147205	0.00014849	0.000151847	0.000142852	0.000152182	0.000156241	0.000160292	0.000154163	0.000155911	K+-transporting ATPase ATPase B chain [EC:3.6.3.12]
K01548	0.00014005	0.000149498	0.000146877	0.000152452	0.000145102	0.000149492	0.000148281	0.000146414	0.000143697	0.000144889	0.000148224	0.000139081	0.000148987	0.000152123	0.000156477	0.000151176	0.000152181	K+-transporting ATPase ATPase C chain [EC:3.6.3.12]
K01551	4.60462e-05	6.32901e-05	5.38177e-05	4.88798e-05	6.6252e-05	4.21798e-05	5.36565e-05	5.66113e-05	3.27556e-05	4.60765e-05	5.08344e-05	4.07957e-05	4.65778e-05	5.73965e-05	5.63382e-05	4.78034e-05	4.8275e-05	arsenite/tail-anchored protein-transporting ATPase [EC:3.6.3.16 3.6.3.-]
K01555	0.000125719	0.000109285	0.000108305	0.000103708	0.000124933	0.000101657	0.00010927	0.000114103	0.000102228	0.000106656	0.000104188	0.00010579	0.00011136	0.000112949	0.000106531	0.000109556	0.00010144	fumarylacetoacetase [EC:3.7.1.2]
K01556	0.000202498	0.000223839	0.000232024	0.000271121	0.000217826	0.000257423	0.000248534	0.000247006	0.000241846	0.000243595	0.000256457	0.00022727	0.00022997	0.000240654	0.000274983	0.00024498	0.000247442	kynureninase [EC:3.7.1.3]
K01560	0.000184129	0.000183335	0.000199052	0.000208506	0.000184024	0.000214142	0.000199735	0.000198979	0.000210996	0.000211934	0.000212525	0.000209939	0.000192171	0.00019646	0.00020601	0.000201333	0.000212577	2-haloacid dehalogenase [EC:3.8.1.2]
K01561	0.000338371	0.000312219	0.0002976	0.000284884	0.000329393	0.000282066	0.000304519	0.00032003	0.000280741	0.000292917	0.000296001	0.000294437	0.000302833	0.000303282	0.000299797	0.000303802	0.0002774	haloacetate dehalogenase [EC:3.8.1.3]
K01563	0.000286354	0.000266242	0.000295536	0.000301151	0.000233412	0.000318136	0.000285252	0.000287452	0.000332304	0.000301666	0.000294907	0.000304812	0.000285227	0.000259457	0.000282356	0.000296434	0.000312536	haloalkane dehalogenase [EC:3.8.1.5]
K01565	2.46662e-07	5.70464e-07	4.91853e-07	4.44639e-07	3.39124e-07	5.11468e-07	4.7174e-07	4.36776e-07	6.83947e-07	5.82487e-07	3.48157e-07	4.70292e-07	4.92892e-07	3.56701e-07	4.78906e-07	2.14929e-07	3.87136e-07	N-sulfoglucosamine sulfohydrolase [EC:3.10.1.1]
K01567	1.05901e-05	1.44819e-05	1.01267e-05	1.31581e-05	1.73608e-05	8.52004e-06	1.4634e-05	2.05104e-05	6.47403e-06	1.20131e-05	1.09638e-05	8.81389e-06	9.54639e-06	1.59933e-05	1.75394e-05	1.02372e-05	1.0709e-05	peptidoglycan-N-acetylmuramic acid deacetylase [EC:3.5.1.-]
K01569	1.69757e-07	2.08426e-07	1.05138e-07	1.15095e-07	2.51485e-07	1.09095e-07	1.7404e-07	1.19723e-07	1.38188e-07	1.1949e-07	1.45388e-07	1.30816e-07	1.57771e-07	1.34801e-07	1.45178e-07	9.80873e-08	1.35224e-07	oxalate decarboxylase [EC:4.1.1.2]
K01571	3.74095e-05	4.19083e-05	4.18819e-05	3.24768e-05	2.66068e-05	3.17781e-05	3.57512e-05	3.80949e-05	3.77749e-05	4.26543e-05	3.66529e-05	3.91559e-05	2.61967e-05	3.31992e-05	2.86885e-05	3.12124e-05	4.70019e-05	oxaloacetate decarboxylase, alpha subunit [EC:4.1.1.3]
K01572	5.31294e-06	3.48922e-06	4.00166e-06	3.69959e-06	7.87932e-07	4.06127e-06	3.15816e-06	4.80122e-06	4.25191e-06	5.9028e-06	4.54273e-06	4.22396e-06	2.30269e-06	3.26989e-06	2.98325e-06	3.97322e-06	9.16872e-06	oxaloacetate decarboxylase, beta subunit [EC:4.1.1.3]
K01573	5.31037e-06	3.45474e-06	3.92789e-06	3.66718e-06	7.65069e-07	4.01077e-06	3.12254e-06	4.76981e-06	4.18254e-06	5.84566e-06	4.52638e-06	4.19671e-06	2.21266e-06	3.25036e-06	2.95487e-06	3.96368e-06	9.12711e-06	oxaloacetate decarboxylase, gamma subunit [EC:4.1.1.3]
K01574	1.87027e-05	2.69463e-05	1.95215e-05	1.90334e-05	3.00885e-05	1.23407e-05	2.01451e-05	1.94479e-05	1.02713e-05	1.69542e-05	1.70614e-05	1.40078e-05	1.95381e-05	2.84389e-05	2.25246e-05	1.94484e-05	1.57034e-05	acetoacetate decarboxylase [EC:4.1.1.4]
K01575	4.15519e-06	5.44129e-06	3.6713e-06	4.64086e-06	7.29415e-06	3.00618e-06	5.20593e-06	7.97246e-06	2.19732e-06	4.30545e-06	4.0809e-06	3.08023e-06	3.6759e-06	6.56551e-06	6.93435e-06	4.15599e-06	3.86443e-06	acetolactate decarboxylase [EC:4.1.1.5]
K01576	9.29333e-06	1.14579e-05	9.59538e-06	9.94525e-06	1.35966e-05	9.70502e-06	1.19617e-05	1.35847e-05	9.15918e-06	1.17125e-05	9.11736e-06	9.57455e-06	7.88102e-06	1.17287e-05	1.25217e-05	9.63089e-06	9.83995e-06	benzoylformate decarboxylase [EC:4.1.1.7]
K01577	9.47584e-06	9.40943e-06	8.47652e-06	8.56601e-06	8.45768e-06	7.1018e-06	8.8109e-06	1.31159e-05	6.63182e-06	1.04337e-05	9.33853e-06	7.79294e-06	6.21439e-06	9.98583e-06	1.02516e-05	8.14692e-06	1.34171e-05	oxalyl-CoA decarboxylase [EC:4.1.1.8]
K01578	3.03907e-05	3.43732e-05	4.5733e-05	5.55103e-05	3.23205e-05	5.55253e-05	4.90101e-05	4.53945e-05	5.45691e-05	4.91266e-05	5.05629e-05	4.55775e-05	4.37585e-05	4.46683e-05	5.46413e-05	4.78625e-05	5.09902e-05	malonyl-CoA decarboxylase [EC:4.1.1.9]
K01579	0.000173224	0.000175775	0.000187009	0.000207697	0.000183164	0.000199155	0.000195713	0.000189797	0.000197805	0.000193323	0.000197232	0.000186977	0.000191371	0.000193973	0.000208825	0.000198083	0.000196941	aspartate 1-decarboxylase [EC:4.1.1.11]
K01580	2.14561e-05	2.59632e-05	2.23466e-05	2.08398e-05	3.74676e-05	1.36039e-05	2.30247e-05	2.42986e-05	1.02471e-05	1.7218e-05	1.77917e-05	1.22516e-05	2.15014e-05	3.2205e-05	2.56369e-05	1.98602e-05	1.92495e-05	glutamate decarboxylase [EC:4.1.1.15]
K01581	0.000110893	0.000109522	0.000112227	9.16097e-05	8.77732e-05	9.71756e-05	0.000107608	0.000101139	0.000114908	0.000105965	9.80784e-05	0.000112446	0.000101271	9.09484e-05	8.84733e-05	0.00010147	9.99728e-05	ornithine decarboxylase [EC:4.1.1.17]
K01582	6.49254e-05	4.08931e-05	5.10885e-05	4.27768e-05	5.21587e-05	5.12708e-05	4.53587e-05	4.41051e-05	5.68263e-05	4.98116e-05	4.88596e-05	5.99311e-05	5.91258e-05	4.59731e-05	3.93208e-05	5.42707e-05	4.94769e-05	lysine decarboxylase [EC:4.1.1.18]
K01584	0.000216401	0.000150695	0.000195189	0.000180408	0.000169747	0.000213458	0.000177896	0.000173525	0.000224416	0.00019363	0.000191675	0.000216969	0.000213427	0.000170165	0.000166432	0.000204271	0.000203656	arginine decarboxylase [EC:4.1.1.19]
K01585	0.000184318	0.000160713	0.000168676	0.000178402	0.000163992	0.000184967	0.000168052	0.000175895	0.00018152	0.000179077	0.00018388	0.000184341	0.000179634	0.000163303	0.00017447	0.000180809	0.000181136	arginine decarboxylase [EC:4.1.1.19]
K01586	0.000344035	0.00035975	0.000330088	0.000333923	0.000363289	0.000315218	0.000337355	0.000356739	0.000301959	0.000336125	0.000334448	0.000317538	0.000325119	0.000356026	0.000348604	0.000330603	0.0003363	diaminopimelate decarboxylase [EC:4.1.1.20]
K01588	0.000184268	0.000185247	0.00018735	0.000188668	0.000180642	0.000189815	0.000186056	0.000185791	0.00019273	0.000189829	0.000186661	0.000188986	0.000183918	0.000181566	0.000185	0.000184983	0.000188771	5-(carboxyamino)imidazole ribonucleotide mutase [EC:5.4.99.18]
K01589	0.000212746	0.000199646	0.000212871	0.000205381	0.000198777	0.000214279	0.000205951	0.000202232	0.000223394	0.000210596	0.000205237	0.000216372	0.000211976	0.000199225	0.000198324	0.000209572	0.000212289	5-(carboxyamino)imidazole ribonucleotide synthase [EC:6.3.4.18]
K01590	4.68432e-06	7.67288e-06	5.55484e-06	4.50294e-06	4.51345e-06	3.29613e-06	4.95027e-06	4.87858e-06	3.09053e-06	4.76121e-06	5.69405e-06	5.30122e-06	3.2785e-06	4.89763e-06	5.22044e-06	5.49734e-06	3.25841e-06	histidine decarboxylase [EC:4.1.1.22]
K01591	0.000184645	0.000185621	0.000187858	0.000189003	0.000180963	0.000190117	0.000186488	0.000186225	0.000193096	0.000190163	0.000186958	0.000189351	0.000184163	0.000181861	0.000185349	0.000185341	0.000189075	orotidine-5-phosphate decarboxylase [EC:4.1.1.23]
K01593	3.06563e-05	3.88879e-05	3.50335e-05	3.19713e-05	2.75193e-05	3.15191e-05	3.54113e-05	3.64109e-05	2.38313e-05	3.24937e-05	3.89409e-05	2.56328e-05	2.82764e-05	2.47999e-05	3.47325e-05	2.92905e-05	3.88359e-05	aromatic-L-amino-acid/L-tryptophan decarboxylase [EC:4.1.1.28 4.1.1.105]
K01595	0.000154542	0.000140741	0.000149199	0.000157543	0.000149274	0.000164438	0.00014811	0.000150727	0.000162211	0.000156295	0.000154822	0.000156914	0.000158676	0.000150585	0.000153786	0.000157181	0.000162407	phosphoenolpyruvate carboxylase [EC:4.1.1.31]
K01596	0.000166265	0.000157752	0.000167679	0.000170159	0.000167923	0.000170655	0.000164981	0.000164807	0.000164811	0.000163954	0.000168191	0.000161705	0.000167714	0.000162991	0.000170088	0.000169024	0.000168708	phosphoenolpyruvate carboxykinase (GTP) [EC:4.1.1.32]
K01597	2.62759e-06	3.67555e-06	2.53886e-06	3.46896e-06	4.59287e-06	2.94052e-06	3.6316e-06	3.94363e-06	3.09674e-06	3.16337e-06	3.15552e-06	3.49428e-06	2.78643e-06	3.81398e-06	3.27542e-06	2.75326e-06	3.05671e-06	diphosphomevalonate decarboxylase [EC:4.1.1.33]
K01598	1.62041e-07	1.83139e-07	1.98349e-07	2.36144e-07	1.01247e-07	2.66677e-07	2.33071e-07	2.01236e-07	2.23653e-07	1.96379e-07	1.48829e-07	2.0652e-07	2.16935e-07	1.69966e-07	1.85566e-07	2.19334e-07	2.00471e-07	phosphopantothenoylcysteine decarboxylase [EC:4.1.1.36]
K01599	0.000194003	0.000197335	0.000199867	0.000197281	0.000192853	0.000197039	0.000195883	0.0001951	0.000199075	0.000198536	0.000196897	0.000197442	0.000191096	0.000191287	0.000194566	0.000194952	0.000197278	uroporphyrinogen decarboxylase [EC:4.1.1.37]
K01601	7.30244e-05	4.76946e-05	6.20436e-05	4.94564e-05	6.24546e-05	5.92319e-05	5.43209e-05	5.19253e-05	6.51247e-05	5.85534e-05	5.60892e-05	6.68382e-05	6.53688e-05	5.37658e-05	4.55151e-05	6.08231e-05	5.79006e-05	ribulose-bisphosphate carboxylase large chain [EC:4.1.1.39]
K01602	4.30423e-05	3.09993e-05	3.3915e-05	3.10422e-05	4.27832e-05	3.29853e-05	3.21484e-05	3.31987e-05	3.21147e-05	3.54644e-05	3.53608e-05	3.72364e-05	3.56562e-05	3.44399e-05	3.05675e-05	3.47926e-05	3.27268e-05	ribulose-bisphosphate carboxylase small chain [EC:4.1.1.39]
K01607	0.000414652	0.000347165	0.000366351	0.00035117	0.000381343	0.000377714	0.00035635	0.000362365	0.000380382	0.00037051	0.000366993	0.000388989	0.000386994	0.000360993	0.000346194	0.000378493	0.000368583	4-carboxymuconolactone decarboxylase [EC:4.1.1.44]
K01608	2.87638e-05	3.69077e-05	2.79131e-05	2.81078e-05	4.00156e-05	1.98201e-05	2.94543e-05	3.31487e-05	1.75727e-05	2.71065e-05	2.71144e-05	2.26043e-05	2.63585e-05	3.93948e-05	3.29185e-05	2.82127e-05	2.95442e-05	tartronate-semialdehyde synthase [EC:4.1.1.47]
K01609	0.000184966	0.000186305	0.000188085	0.000189862	0.000181764	0.00019062	0.00018713	0.000186772	0.000193471	0.000190747	0.000187737	0.000189666	0.00018456	0.000182518	0.00018618	0.000185662	0.000189852	indole-3-glycerol phosphate synthase [EC:4.1.1.48]
K01610	2.07786e-05	2.80852e-05	2.44228e-05	2.02563e-05	1.73748e-05	2.04362e-05	2.32423e-05	2.29518e-05	2.83935e-05	2.67648e-05	2.08911e-05	2.72541e-05	1.80259e-05	2.13382e-05	1.60602e-05	1.68563e-05	2.31039e-05	phosphoenolpyruvate carboxykinase (ATP) [EC:4.1.1.49]
K01611	9.70059e-05	8.37289e-05	8.61938e-05	7.89464e-05	7.87994e-05	8.45439e-05	7.86897e-05	8.33156e-05	8.27013e-05	8.54917e-05	8.71533e-05	9.08278e-05	8.79386e-05	7.31956e-05	7.55624e-05	8.65845e-05	8.97948e-05	S-adenosylmethionine decarboxylase [EC:4.1.1.50]
K01612	4.49341e-06	5.66351e-06	4.10953e-06	4.78241e-06	7.61422e-06	3.23851e-06	5.52144e-06	8.39022e-06	2.74563e-06	4.75639e-06	4.31662e-06	3.39395e-06	4.04803e-06	6.82925e-06	7.18541e-06	4.31947e-06	4.11975e-06	vanillate/4-hydroxybenzoate decarboxylase subunit C [EC:4.1.1.- 4.1.1.61]
K01613	0.000201471	0.000197555	0.000211397	0.000231163	0.000191226	0.00023137	0.000215507	0.000216493	0.000227354	0.00022228	0.000224167	0.000215004	0.000212978	0.000209633	0.000225562	0.000219172	0.000231482	phosphatidylserine decarboxylase [EC:4.1.1.65]
K01616	0.0001026	0.000100218	8.68491e-05	9.32012e-05	0.000107157	8.13163e-05	9.156e-05	0.000100222	7.77091e-05	9.1434e-05	9.21726e-05	8.35384e-05	8.7113e-05	9.68865e-05	9.53823e-05	8.90019e-05	8.83968e-05	2-oxoglutarate decarboxylase [EC:4.1.1.71]
K01617	3.49235e-05	3.87438e-05	5.06391e-05	5.91232e-05	3.96214e-05	5.77453e-05	5.2932e-05	4.92074e-05	5.6665e-05	5.14125e-05	5.4431e-05	4.68782e-05	4.79152e-05	4.93405e-05	5.8898e-05	5.08124e-05	5.54355e-05	2-oxo-3-hexenedioate decarboxylase [EC:4.1.1.77]
K01619	0.000105898	0.000110523	9.83513e-05	9.32217e-05	0.000113987	9.20202e-05	9.98049e-05	0.000102568	8.87296e-05	9.74149e-05	9.72654e-05	9.72231e-05	9.55751e-05	0.000102477	9.58157e-05	9.36691e-05	8.87756e-05	deoxyribose-phosphate aldolase [EC:4.1.2.4]
K01620	0.000250401	0.000266807	0.000252671	0.000248999	0.000252101	0.000246067	0.000253243	0.000258426	0.000239019	0.000251291	0.000255485	0.000247127	0.000241789	0.000251515	0.000256386	0.000250012	0.000248561	threonine aldolase [EC:4.1.2.48]
K01621	3.37422e-05	4.96017e-05	3.4446e-05	3.95292e-05	4.73672e-05	2.57836e-05	4.54612e-05	4.6133e-05	2.0872e-05	3.4439e-05	3.66058e-05	2.32698e-05	3.30428e-05	4.46768e-05	4.73752e-05	3.26018e-05	3.14821e-05	xylulose-5-phosphate/fructose-6-phosphate phosphoketolase [EC:4.1.2.9 4.1.2.22]
K01622	2.51742e-07	6.9769e-07	6.39665e-07	4.12425e-07	1.52687e-07	2.86375e-07	5.5876e-07	7.04751e-07	2.70271e-07	4.73284e-07	3.19596e-07	6.81636e-07	2.24224e-07	6.84748e-07	4.17524e-07	1.89363e-07	3.30494e-07	fructose 1,6-bisphosphate aldolase/phosphatase [EC:4.1.2.13 3.1.3.11]
K01623	2.91987e-05	4.13248e-05	3.57897e-05	3.43386e-05	3.22574e-05	2.58764e-05	3.32171e-05	3.36842e-05	3.3117e-05	3.35727e-05	2.78192e-05	3.11525e-05	2.55119e-05	2.99079e-05	2.8669e-05	2.52452e-05	2.94974e-05	fructose-bisphosphate aldolase, class I [EC:4.1.2.13]
K01624	0.000195671	0.000196195	0.000195511	0.000195193	0.000214671	0.000190377	0.000197324	0.000196606	0.000180762	0.00019113	0.000193699	0.000183688	0.000198336	0.000211108	0.000204389	0.000198316	0.000195292	fructose-bisphosphate aldolase, class II [EC:4.1.2.13]
K01625	0.000219617	0.000212832	0.000218682	0.000213377	0.000207784	0.000219395	0.000215166	0.000215997	0.000227978	0.00021927	0.000214146	0.000224876	0.000218269	0.000209899	0.000210547	0.000218083	0.000217428	2-dehydro-3-deoxyphosphogluconate aldolase / (4S)-4-hydroxy-2-oxoglutarate aldolase [EC:4.1.2.14 4.1.3.42]
K01626	0.000318449	0.000311965	0.000315538	0.000297907	0.000288967	0.000315676	0.000303669	0.000304734	0.000317795	0.000314503	0.000313521	0.000324029	0.000305861	0.000284649	0.000290384	0.00030482	0.000309024	3-deoxy-7-phosphoheptulonate synthase [EC:2.5.1.54]
K01627	0.000138374	0.000118669	0.000134107	0.000141042	0.000119242	0.000154253	0.000130241	0.000131479	0.000154709	0.00014284	0.000141554	0.000147505	0.000141414	0.000123529	0.000133139	0.000142254	0.000148963	2-dehydro-3-deoxyphosphooctonate aldolase (KDO 8-P synthase) [EC:2.5.1.55]
K01628	0.000159783	0.000149995	0.000151999	0.000162131	0.000161852	0.00015588	0.000155257	0.000156614	0.000154818	0.000154897	0.00015561	0.000151588	0.000162057	0.000166865	0.000162656	0.000160647	0.000158766	L-fuculose-phosphate aldolase [EC:4.1.2.17]
K01630	4.92873e-05	2.91796e-05	4.36186e-05	3.52712e-05	3.30837e-05	4.57695e-05	3.75992e-05	3.57341e-05	5.37154e-05	4.09904e-05	3.59507e-05	4.62155e-05	4.43346e-05	3.19147e-05	2.94293e-05	4.04608e-05	4.03016e-05	2-dehydro-3-deoxyglucarate aldolase [EC:4.1.2.20]
K01631	7.31898e-05	6.41241e-05	7.13566e-05	5.76442e-05	5.30321e-05	7.36447e-05	6.25598e-05	5.99659e-05	8.30042e-05	6.98502e-05	6.22368e-05	7.83156e-05	6.8065e-05	5.35546e-05	5.00313e-05	6.40561e-05	7.0649e-05	2-dehydro-3-deoxyphosphogalactonate aldolase [EC:4.1.2.21]
K01633	0.000186625	0.000189658	0.000190898	0.000191402	0.000183906	0.000192825	0.000189347	0.000188656	0.000196222	0.000193528	0.000189965	0.000192897	0.000186621	0.000184209	0.000188506	0.000188261	0.000191767	7,8-dihydroneopterin aldolase/epimerase/oxygenase [EC:4.1.2.25 5.1.99.8 1.13.11.81]
K01634	1.96538e-05	2.98789e-05	1.92766e-05	2.55135e-05	2.3777e-05	1.91477e-05	2.41553e-05	2.55456e-05	1.86816e-05	2.24601e-05	2.37156e-05	1.87949e-05	1.81479e-05	2.1206e-05	2.48674e-05	1.989e-05	2.11471e-05	sphinganine-1-phosphate aldolase [EC:4.1.2.27]
K01635	4.2182e-07	5.21575e-07	5.08905e-07	4.40538e-07	2.98298e-07	5.41773e-07	5.87766e-07	5.50215e-07	7.24238e-07	7.21096e-07	4.80469e-07	5.54353e-07	4.15722e-07	4.6122e-07	2.6998e-07	3.87127e-07	3.48933e-07	tagatose 1,6-diphosphate aldolase [EC:4.1.2.40]
K01637	0.000157875	0.00015041	0.000159035	0.000162784	0.000137387	0.000172438	0.000157844	0.000156222	0.00017911	0.000167396	0.000162629	0.000170804	0.000158576	0.00014345	0.000153167	0.000158809	0.000165621	isocitrate lyase [EC:4.1.3.1]
K01638	0.000196744	0.000199795	0.000198993	0.00020134	0.000187723	0.000199925	0.000200577	0.000201259	0.000202225	0.000203847	0.000200921	0.000198269	0.000192236	0.000191112	0.000198417	0.000195322	0.000204634	malate synthase [EC:2.3.3.9]
K01639	6.47198e-07	1.18504e-06	9.78199e-07	8.18346e-07	7.37308e-07	7.54407e-07	1.06782e-06	1.15477e-06	7.37557e-07	8.89248e-07	7.58197e-07	1.12354e-06	6.61668e-07	1.09615e-06	8.69795e-07	4.60238e-07	8.03934e-07	N-acetylneuraminate lyase [EC:4.1.3.3]
K01640	0.000270674	0.000236488	0.000280034	0.000275095	0.000244665	0.00029417	0.000269899	0.000263681	0.000302083	0.000279951	0.000272792	0.000282616	0.000279072	0.000257017	0.000265827	0.000281389	0.000293059	hydroxymethylglutaryl-CoA lyase [EC:4.1.3.4]
K01641	3.30404e-06	4.11999e-06	3.4153e-06	3.75207e-06	5.23301e-06	3.40519e-06	4.26262e-06	4.77915e-06	4.19336e-06	4.06526e-06	3.62696e-06	4.12171e-06	3.5307e-06	4.34146e-06	3.77754e-06	3.08021e-06	3.56735e-06	hydroxymethylglutaryl-CoA synthase [EC:2.3.3.10]
K01644	0.000286949	0.00028619	0.000311553	0.000331167	0.000288396	0.000335391	0.000312479	0.000311489	0.000320939	0.000316107	0.00032344	0.000301252	0.000305554	0.000308983	0.00033047	0.000317001	0.000337327	citrate lyase subunit beta / citryl-CoA lyase [EC:4.1.3.34]
K01647	0.000497118	0.000518692	0.000523997	0.000525431	0.000503584	0.000512657	0.000529	0.00052076	0.000538183	0.00052179	0.000502984	0.000510724	0.000500087	0.000519876	0.000520186	0.000505141	0.000506021	citrate synthase [EC:2.3.3.1]
K01649	0.000366985	0.000371738	0.000373859	0.000368892	0.000362626	0.000373068	0.000370883	0.000371281	0.000375557	0.000373772	0.000374285	0.000377779	0.000364033	0.00036691	0.000369208	0.000371466	0.000367864	2-isopropylmalate synthase [EC:2.3.3.13]
K01652	0.000652293	0.000719859	0.000690772	0.000719604	0.000710202	0.000686471	0.000711684	0.000702142	0.000688471	0.000699928	0.000697965	0.000684374	0.000679167	0.000737224	0.000733305	0.000698571	0.000677309	acetolactate synthase I/II/III large subunit [EC:2.2.1.6]
K01653	0.000178877	0.000179113	0.000183088	0.000178597	0.000174633	0.000184793	0.000181062	0.000177826	0.000187369	0.000184134	0.000182546	0.000186157	0.000178856	0.000177262	0.000177712	0.00018082	0.000180084	acetolactate synthase I/III small subunit [EC:2.2.1.6]
K01654	8.92191e-05	8.52351e-05	7.68554e-05	7.67897e-05	9.50849e-05	7.5774e-05	8.10169e-05	8.34316e-05	8.06991e-05	8.34425e-05	7.47647e-05	8.33246e-05	7.95304e-05	8.74615e-05	7.61231e-05	7.54938e-05	7.04636e-05	N-acetylneuraminate synthase [EC:2.5.1.56]
K01657	0.000300399	0.000298981	0.000295065	0.000285396	0.000294157	0.000290937	0.000289174	0.000286872	0.000298888	0.000296325	0.000289529	0.000302671	0.000295166	0.000287266	0.000279659	0.000289105	0.000295151	anthranilate synthase component I [EC:4.1.3.27]
K01658	0.000272589	0.000255696	0.000252464	0.000256085	0.000265063	0.000255458	0.000249719	0.000255382	0.000255531	0.000261317	0.00026029	0.00026527	0.000256795	0.000252497	0.000251485	0.000258692	0.000254653	anthranilate synthase component II [EC:4.1.3.27]
K01659	0.000130441	0.000115699	0.000117271	0.000106858	0.000115995	0.000113226	0.000107378	0.000110496	0.000117954	0.000115268	0.000108833	0.000121872	0.00011848	0.000109434	9.9242e-05	0.000112955	0.000114363	2-methylcitrate synthase [EC:2.3.3.5]
K01661	0.000139866	0.000140551	0.000156276	0.000150533	0.000127093	0.000158477	0.000156009	0.000142968	0.000161525	0.000149519	0.000152038	0.000149114	0.00014702	0.00013025	0.000146	0.000151154	0.000155086	naphthoate synthase [EC:4.1.3.36]
K01662	0.000227205	0.000248476	0.000233471	0.00023589	0.000237061	0.000222763	0.000240951	0.000240686	0.000221042	0.000233957	0.000233956	0.000222745	0.000222985	0.000234571	0.000241152	0.000228609	0.00022665	1-deoxy-D-xylulose-5-phosphate synthase [EC:2.2.1.7]
K01664	0.000274865	0.000261067	0.000252398	0.000258266	0.000274612	0.000254514	0.000256196	0.000259088	0.000252833	0.000261915	0.000261245	0.000261635	0.000263671	0.000263052	0.000258034	0.000260778	0.000254258	para-aminobenzoate synthetase component II [EC:2.6.1.85]
K01665	0.000282132	0.000256638	0.000235196	0.000236387	0.000271039	0.00023168	0.00023849	0.000250293	0.000231835	0.000249555	0.000247499	0.000255237	0.000249062	0.000240998	0.00023465	0.000244832	0.000234636	para-aminobenzoate synthetase component I [EC:2.6.1.85]
K01666	6.21796e-05	6.11905e-05	6.37437e-05	4.94974e-05	6.52922e-05	4.80145e-05	5.61063e-05	5.19681e-05	5.05957e-05	5.11361e-05	5.1628e-05	5.47426e-05	5.82018e-05	6.04249e-05	5.11885e-05	5.94946e-05	5.14383e-05	4-hydroxy 2-oxovalerate aldolase [EC:4.1.3.39]
K01667	5.40766e-06	9.68147e-06	7.24072e-06	5.82228e-06	5.39823e-06	4.41149e-06	6.5628e-06	6.96635e-06	3.93678e-06	6.15872e-06	6.63163e-06	6.96415e-06	4.15202e-06	6.71424e-06	6.52494e-06	6.275e-06	4.27855e-06	tryptophanase [EC:4.1.99.1]
K01668	3.97064e-07	9.96536e-07	8.86166e-07	7.73587e-07	4.50985e-07	5.98172e-07	8.55951e-07	1.09081e-06	4.38982e-07	7.62138e-07	5.50725e-07	8.98048e-07	3.87711e-07	8.90531e-07	7.6828e-07	4.29132e-07	5.21509e-07	tyrosine phenol-lyase [EC:4.1.99.2]
K01669	0.00017833	0.000189967	0.000188962	0.000184837	0.000182174	0.000186095	0.000186841	0.000182205	0.000188592	0.000191745	0.0001858	0.000189811	0.000179992	0.000182818	0.000183343	0.0001846	0.0001873	deoxyribodipyrimidine photo-lyase [EC:4.1.99.3]
K01671	2.51742e-07	6.9769e-07	6.39665e-07	4.12425e-07	1.52687e-07	2.86375e-07	5.5876e-07	7.04751e-07	2.70271e-07	4.73284e-07	3.19596e-07	6.81636e-07	2.24224e-07	6.84748e-07	4.17524e-07	1.89363e-07	3.30494e-07	sulfofructosephosphate aldolase [EC:4.1.2.57]
K01673	0.000437245	0.000480387	0.000434144	0.000452498	0.000490522	0.000420912	0.000453637	0.000471464	0.000393209	0.000440929	0.000451152	0.000420842	0.000435122	0.000478677	0.000477909	0.000445476	0.000435715	carbonic anhydrase [EC:4.2.1.1]
K01674	0.00015259	0.000123601	0.000127672	0.000122852	0.000113994	0.000143931	0.000117146	0.000126034	0.000139566	0.000130195	0.000132804	0.000139637	0.000133962	0.000105939	0.000114296	0.000131662	0.000133365	carbonic anhydrase [EC:4.2.1.1]
K01676	0.000169919	0.00016173	0.00016859	0.000175123	0.000165734	0.000174926	0.000167482	0.000170688	0.000170392	0.000170374	0.000173285	0.000167087	0.000170438	0.000165554	0.000172455	0.000171431	0.000176448	fumarate hydratase, class I [EC:4.2.1.2]
K01677	3.84685e-05	2.24455e-05	3.50882e-05	2.72437e-05	2.4191e-05	3.46056e-05	2.93961e-05	2.76742e-05	4.11029e-05	3.39192e-05	2.86741e-05	3.67773e-05	3.49068e-05	2.52841e-05	2.18588e-05	3.26394e-05	3.88966e-05	fumarate hydratase subunit alpha [EC:4.2.1.2]
K01678	9.00258e-06	8.39055e-06	7.40342e-06	9.22351e-06	4.70609e-06	7.18531e-06	6.78705e-06	9.46871e-06	7.2865e-06	9.70154e-06	8.04882e-06	7.14865e-06	5.19202e-06	6.68321e-06	7.54671e-06	7.45168e-06	1.33999e-05	fumarate hydratase subunit beta [EC:4.2.1.2]
K01679	0.000214385	0.000218477	0.000229702	0.000244385	0.000214193	0.000244955	0.00023371	0.000230867	0.000245977	0.000237373	0.000237619	0.000233831	0.000228675	0.000226857	0.00024108	0.000233402	0.000239606	fumarate hydratase, class II [EC:4.2.1.2]
K01681	0.000366226	0.00032461	0.00033883	0.000325239	0.000330183	0.000346849	0.000324567	0.000326971	0.000363652	0.000345072	0.000331421	0.000364176	0.000347308	0.000318038	0.000309713	0.000341953	0.000341482	aconitate hydratase [EC:4.2.1.3]
K01682	0.000126874	0.000100938	0.00012049	0.00012957	0.000104893	0.000136671	0.00011822	0.000119938	0.000141615	0.000129382	0.000126108	0.000131195	0.000126543	0.00011249	0.000120279	0.000127399	0.000132393	aconitate hydratase 2 / 2-methylisocitrate dehydratase [EC:4.2.1.3 4.2.1.99]
K01683	5.34348e-07	8.33703e-07	3.40153e-07	8.54616e-07	9.94509e-07	5.25274e-07	7.33818e-07	7.9051e-07	3.07454e-07	5.48615e-07	5.96177e-07	3.85181e-07	2.94106e-07	5.05014e-07	9.7695e-07	8.75974e-07	6.05196e-07	D-arabinonate dehydratase [EC:4.2.1.5]
K01684	0.000135821	0.00014538	0.000143899	0.000148356	0.00015283	0.000144933	0.000147737	0.000146816	0.000139188	0.000138654	0.000143064	0.000136263	0.000146793	0.000155386	0.000155376	0.000148256	0.000143135	galactonate dehydratase [EC:4.2.1.6]
K01685	0.000102	9.78509e-05	0.000102513	0.000111696	9.03581e-05	0.000115885	0.000106085	0.000104484	0.000122547	0.000114824	0.000110073	0.000116137	0.000102808	0.000101462	0.000106824	0.000106413	0.0001082	altronate hydrolase [EC:4.2.1.7]
K01686	1.1891e-05	1.91493e-05	1.62547e-05	1.13679e-05	1.16695e-05	1.14198e-05	1.60568e-05	1.34068e-05	1.87118e-05	1.53534e-05	1.09671e-05	1.78281e-05	1.12312e-05	1.34529e-05	9.18435e-06	9.62463e-06	9.62347e-06	mannonate dehydratase [EC:4.2.1.8]
K01687	0.000441828	0.00044455	0.000489072	0.000479883	0.000403683	0.00051845	0.000479238	0.000451655	0.000538161	0.000489686	0.000482913	0.000507293	0.000475987	0.000441144	0.000466482	0.000484192	0.000492006	dihydroxy-acid dehydratase [EC:4.2.1.9]
K01689	0.000196923	0.000206363	0.000203311	0.000203525	0.00019358	0.000200359	0.000204455	0.000203605	0.000202717	0.000204376	0.000204184	0.000201169	0.000194907	0.000194015	0.000202418	0.000198108	0.000200423	enolase [EC:4.2.1.11]
K01690	0.000192291	0.000176768	0.000193569	0.000183481	0.000159868	0.000200541	0.000183944	0.000178022	0.000212603	0.000194018	0.000189491	0.000206118	0.000190618	0.00016706	0.000173065	0.000191294	0.000192027	phosphogluconate dehydratase [EC:4.2.1.12]
K01692	0.00182624	0.00181122	0.00195148	0.00206757	0.00187672	0.00204518	0.00199027	0.00193676	0.00203723	0.00198199	0.0019995	0.00191399	0.00194244	0.00198317	0.00206039	0.00199947	0.00202497	enoyl-CoA hydratase [EC:4.2.1.17]
K01693	0.000166691	0.000173549	0.000174532	0.000173786	0.000169694	0.000172657	0.000173284	0.000171005	0.000174536	0.000175167	0.00017299	0.000174403	0.000170414	0.000170674	0.000172274	0.000171622	0.000176281	imidazoleglycerol-phosphate dehydratase [EC:4.2.1.19]
K01695	0.000187197	0.000189635	0.00019237	0.000190637	0.000183358	0.000197808	0.000187947	0.000187932	0.00019475	0.000192265	0.000192938	0.000194051	0.000189803	0.000182428	0.000187569	0.00018933	0.000195786	tryptophan synthase alpha chain [EC:4.2.1.20]
K01696	0.000208544	0.000220795	0.000212804	0.00021299	0.00021764	0.000206219	0.000211579	0.000211378	0.000206921	0.000211841	0.000210406	0.00020936	0.000207162	0.000215946	0.00021375	0.000211807	0.000208361	tryptophan synthase beta chain [EC:4.2.1.20]
K01697	0.000322855	0.000312072	0.000314812	0.000301968	0.000296588	0.000327599	0.000300704	0.000308328	0.000319026	0.000318697	0.000320159	0.000329038	0.000312717	0.000288665	0.000296054	0.000313911	0.000327651	cystathionine beta-synthase [EC:4.2.1.22]
K01698	0.000184377	0.000185376	0.00018745	0.00018876	0.000180745	0.000189919	0.000186159	0.000185949	0.000192912	0.000190085	0.000186778	0.00018912	0.000183993	0.000181626	0.000185084	0.000185037	0.000188855	porphobilinogen synthase [EC:4.2.1.24]
K01699	3.21509e-08	5.23619e-08	8.61428e-08	6.28394e-08	6.25991e-08	6.22921e-08	4.83444e-08	5.09459e-08	8.87954e-08	6.75378e-08	8.38777e-08	7.06568e-08	9.78925e-08	8.38434e-08	4.54819e-08	4.2005e-08	7.09214e-08	propanediol dehydratase large subunit [EC:4.2.1.28]
K01703	0.000252194	0.000223319	0.000248609	0.000231073	0.000225568	0.000251134	0.00023717	0.000230739	0.000266799	0.000245649	0.000234415	0.000255911	0.000247351	0.000226992	0.000220146	0.000243759	0.000250925	3-isopropylmalate/(R)-2-methylmalate dehydratase large subunit [EC:4.2.1.33 4.2.1.35]
K01704	0.000225042	0.000215901	0.000226544	0.000218609	0.000212136	0.000228398	0.000224298	0.000218895	0.000237386	0.000227132	0.000220483	0.000229095	0.000222919	0.000212013	0.000213082	0.000221167	0.000224227	3-isopropylmalate/(R)-2-methylmalate dehydratase small subunit [EC:4.2.1.33 4.2.1.35]
K01706	0.000187026	0.000157377	0.000180796	0.000172725	0.000163546	0.000189562	0.000174078	0.00017227	0.000191784	0.000180647	0.000177907	0.000185562	0.000185024	0.000169229	0.000169494	0.000185059	0.00018978	glucarate dehydratase [EC:4.2.1.40]
K01707	0.000115036	0.000101615	0.000100948	9.10867e-05	0.000108516	9.50368e-05	9.86143e-05	0.000106013	8.96044e-05	0.000100085	9.89247e-05	0.000100055	0.000102887	0.000102576	9.57299e-05	0.000102708	0.000106474	5-dehydro-4-deoxyglucarate dehydratase [EC:4.2.1.41]
K01708	8.89373e-05	7.5796e-05	9.85891e-05	9.70201e-05	7.05552e-05	0.000115084	9.25669e-05	8.8076e-05	0.00011646	9.95871e-05	9.88546e-05	0.000103898	9.82079e-05	8.19945e-05	9.179e-05	9.99257e-05	0.000108111	galactarate dehydratase [EC:4.2.1.42]
K01709	7.5684e-05	5.42924e-05	5.61477e-05	5.87071e-05	5.85561e-05	7.14156e-05	5.35597e-05	6.05843e-05	6.65843e-05	6.24222e-05	6.45087e-05	6.77167e-05	6.56026e-05	5.1558e-05	5.44251e-05	6.13983e-05	5.8715e-05	CDP-glucose 4,6-dehydratase [EC:4.2.1.45]
K01710	0.000381466	0.00038797	0.000359455	0.000363128	0.000406216	0.000349205	0.000362879	0.000372653	0.000338014	0.0003659	0.000367746	0.000358969	0.000362239	0.000385014	0.000370592	0.000364428	0.000364964	dTDP-glucose 4,6-dehydratase [EC:4.2.1.46]
K01711	0.000216995	0.00019243	0.000225818	0.000230248	0.000203931	0.000246024	0.000217818	0.000207835	0.000247664	0.00022532	0.000226563	0.000229965	0.000232885	0.000213809	0.000221515	0.000232853	0.000240999	GDPmannose 4,6-dehydratase [EC:4.2.1.47]
K01712	0.000123899	0.000131776	0.000113916	0.000117415	0.000128874	0.000106287	0.000115591	0.000125046	0.00010291	0.000116675	0.000115382	0.000111076	0.000109581	0.000117285	0.000116811	0.000109948	0.000113337	urocanate hydratase [EC:4.2.1.49]
K01713	2.96664e-05	1.63228e-05	2.73308e-05	1.85003e-05	1.97547e-05	2.58623e-05	2.16814e-05	1.88234e-05	3.17587e-05	2.25827e-05	1.97935e-05	2.89266e-05	2.90929e-05	1.94048e-05	1.51883e-05	2.56996e-05	2.50232e-05	cyclohexadienyl dehydratase [EC:4.2.1.51 4.2.1.91]
K01714	0.000371938	0.000398826	0.000371012	0.000359814	0.000391615	0.000337708	0.0003778	0.000389542	0.000346294	0.000367384	0.000355216	0.000361298	0.000352818	0.000384233	0.000369895	0.000356303	0.000350257	4-hydroxy-tetrahydrodipicolinate synthase [EC:4.3.3.7]
K01715	0.000734729	0.000721893	0.000811661	0.000825856	0.000721653	0.000831615	0.000809082	0.000788912	0.000853583	0.000810318	0.000804694	0.000789904	0.000773336	0.000767687	0.000811624	0.000799836	0.000829896	enoyl-CoA hydratase [EC:4.2.1.17]
K01716	2.69161e-05	3.75577e-05	3.17474e-05	2.86595e-05	2.38882e-05	2.63522e-05	3.03283e-05	3.07533e-05	3.40194e-05	3.47837e-05	2.6647e-05	3.31689e-05	2.32292e-05	2.63382e-05	2.53381e-05	2.48095e-05	3.03576e-05	3-hydroxyacyl-[acyl-carrier protein] dehydratase / trans-2-decenoyl-[acyl-carrier protein] isomerase [EC:4.2.1.59 5.3.3.14]
K01719	0.000194341	0.000198174	0.00019689	0.000198009	0.000199249	0.000193877	0.00019591	0.000194423	0.000194516	0.000196244	0.000193078	0.000191799	0.000195104	0.000198915	0.000196847	0.000194137	0.000196314	uroporphyrinogen-III synthase [EC:4.2.1.75]
K01720	1.73662e-05	2.65459e-05	2.1202e-05	2.03707e-05	1.71917e-05	1.61914e-05	2.05478e-05	2.02418e-05	2.2583e-05	2.14947e-05	1.61855e-05	2.19375e-05	1.57894e-05	1.82838e-05	1.62115e-05	1.47791e-05	1.66196e-05	2-methylcitrate dehydratase [EC:4.2.1.79]
K01721	9.77718e-06	1.4456e-05	1.01254e-05	1.01566e-05	1.3072e-05	7.27075e-06	1.13412e-05	1.42969e-05	6.27483e-06	1.03473e-05	1.06113e-05	9.30425e-06	7.72285e-06	1.2431e-05	1.31638e-05	1.09673e-05	7.88087e-06	nitrile hydratase subunit alpha [EC:4.2.1.84]
K01724	0.000171455	0.00018006	0.000179085	0.00017937	0.000177655	0.000176222	0.000179493	0.000180068	0.000177277	0.000180349	0.000177911	0.000178435	0.000174427	0.000178311	0.00018019	0.000176255	0.00018088	4a-hydroxytetrahydrobiopterin dehydratase [EC:4.2.1.96]
K01725	0.000132098	0.000111474	0.000124661	0.0001323	0.000130912	0.000135277	0.000127582	0.000128395	0.000137028	0.000128595	0.000127571	0.000130062	0.000136008	0.000133813	0.000132648	0.000133966	0.000128771	cyanate lyase [EC:4.2.1.104]
K01726	3.51596e-05	2.44786e-05	3.23848e-05	2.62911e-05	2.64603e-05	3.0506e-05	2.77151e-05	2.49906e-05	3.73461e-05	2.92106e-05	2.54058e-05	3.40361e-05	3.4098e-05	2.43127e-05	2.27893e-05	3.21566e-05	3.15241e-05	gamma-carbonic anhydrase [EC:4.2.1.-]
K01727	4.09507e-05	5.4938e-05	3.91857e-05	4.16599e-05	7.52795e-05	2.38767e-05	4.47262e-05	4.46424e-05	1.69081e-05	3.16838e-05	3.17838e-05	2.21301e-05	4.59163e-05	6.95017e-05	5.1216e-05	3.91962e-05	3.48727e-05	hyaluronate lyase [EC:4.2.2.1]
K01728	0.000195339	0.000230178	0.000205905	0.000176919	0.000175595	0.000189114	0.00020179	0.000193542	0.000161167	0.000180156	0.00021166	0.000182714	0.000189042	0.00016114	0.000191349	0.000195581	0.00018409	pectate lyase [EC:4.2.2.2]
K01729	3.95267e-05	5.10858e-05	3.84425e-05	3.85654e-05	5.76458e-05	2.88567e-05	3.97244e-05	3.92975e-05	2.55432e-05	3.67745e-05	3.65032e-05	3.04039e-05	4.10273e-05	5.64385e-05	4.35939e-05	3.84403e-05	3.94554e-05	poly(beta-D-mannuronate) lyase [EC:4.2.2.3]
K01730	1.97709e-05	1.5277e-05	1.53587e-05	1.71377e-05	1.37802e-05	2.02156e-05	1.55778e-05	1.70186e-05	2.15074e-05	1.8007e-05	1.60495e-05	1.79943e-05	1.59953e-05	1.33318e-05	1.56408e-05	1.63222e-05	1.50903e-05	oligogalacturonide lyase [EC:4.2.2.6]
K01733	0.000241163	0.000265744	0.000248056	0.000246664	0.000263815	0.000228368	0.000250188	0.000249697	0.000224345	0.000241266	0.000242891	0.000230852	0.000237402	0.000258435	0.000254734	0.000243065	0.000237289	threonine synthase [EC:4.2.3.1]
K01734	0.000102412	7.83248e-05	8.82268e-05	7.4418e-05	7.74136e-05	9.19935e-05	7.78458e-05	7.94216e-05	9.90748e-05	8.84004e-05	8.25105e-05	0.00010061	9.13246e-05	7.38169e-05	6.65364e-05	8.59526e-05	8.67997e-05	methylglyoxal synthase [EC:4.2.3.3]
K01735	0.000186592	0.000204552	0.000196247	0.000199159	0.000192592	0.000189747	0.000203724	0.000202948	0.000189092	0.000198272	0.000199151	0.000189766	0.000187837	0.000192317	0.000203162	0.000190953	0.000196041	3-dehydroquinate synthase [EC:4.2.3.4]
K01736	0.000184384	0.000185446	0.000187466	0.000188798	0.000180903	0.00018994	0.000186181	0.000186	0.000192803	0.000189963	0.000186756	0.000189078	0.000184018	0.000181683	0.000185145	0.000185136	0.000188906	chorismate synthase [EC:4.2.3.5]
K01737	0.000103718	0.000107776	9.4591e-05	9.2921e-05	9.19611e-05	9.59048e-05	9.1941e-05	9.74179e-05	9.69453e-05	0.000102317	9.81039e-05	0.00010535	8.95211e-05	8.69303e-05	8.87924e-05	9.32974e-05	9.39254e-05	6-pyruvoyltetrahydropterin/6-carboxytetrahydropterin synthase [EC:4.2.3.12 4.1.2.50]
K01738	0.000574405	0.000629114	0.000553549	0.000557901	0.00060654	0.000522766	0.000564507	0.000587545	0.000489198	0.000558249	0.000572927	0.000534476	0.000543574	0.00056837	0.000577685	0.000554355	0.000558864	cysteine synthase A [EC:2.5.1.47]
K01739	0.000465528	0.000481063	0.000477738	0.000496943	0.000469719	0.00048221	0.000486742	0.000485177	0.000490695	0.000485132	0.000481605	0.000473617	0.000466926	0.000478942	0.00049654	0.000479373	0.000470444	cystathionine gamma-synthase [EC:2.5.1.48]
K01740	0.000535228	0.000527374	0.000539031	0.000539172	0.000515312	0.000548795	0.000537511	0.00053708	0.000556215	0.000546559	0.000545939	0.000551929	0.000536861	0.000518757	0.000531173	0.000535056	0.000537522	O-acetylhomoserine (thiol)-lyase [EC:2.5.1.49]
K01744	0.000156406	0.000164872	0.000170842	0.000172347	0.00015564	0.000169317	0.000169543	0.000174338	0.000171003	0.000170168	0.00016708	0.000162866	0.000159211	0.000163034	0.000170135	0.000161975	0.000176781	aspartate ammonia-lyase [EC:4.3.1.1]
K01745	0.000235897	0.000236518	0.00021753	0.000209474	0.000211144	0.000210385	0.000213316	0.00022845	0.000206572	0.000219443	0.000221038	0.000217556	0.000204883	0.000203092	0.00020852	0.000211879	0.000215727	histidine ammonia-lyase [EC:4.3.1.3]
K01749	0.000220093	0.000234806	0.000221939	0.00022689	0.000240355	0.000212877	0.000228445	0.000228407	0.000209912	0.000220479	0.000218923	0.000209448	0.000221831	0.000236277	0.000232009	0.000219556	0.000220023	hydroxymethylbilane synthase [EC:2.5.1.61]
K01750	0.000264275	0.000244708	0.000263676	0.000243537	0.00026688	0.000242768	0.000258766	0.000247527	0.000256299	0.000243875	0.000237074	0.000244515	0.000268321	0.000270755	0.000247714	0.000260995	0.000251227	ornithine cyclodeaminase [EC:4.3.1.12]
K01751	1.29776e-05	1.8517e-05	1.30712e-05	1.43496e-05	1.55486e-05	1.04976e-05	1.41178e-05	1.79273e-05	9.53586e-06	1.37334e-05	1.37948e-05	1.2326e-05	1.0855e-05	1.5277e-05	1.6321e-05	1.32957e-05	1.19138e-05	diaminopropionate ammonia-lyase [EC:4.3.1.15]
K01752	0.000120967	0.000127292	0.000110011	0.000111074	0.000117587	0.000104298	0.000110311	0.000121681	0.000102049	0.000115945	0.00011276	0.000111014	0.000106215	0.000112655	0.000110673	0.000106956	0.000113151	L-serine dehydratase [EC:4.3.1.17]
K01753	0.000131974	0.000132033	0.000134562	0.000143496	0.000131538	0.000134306	0.000137463	0.000138209	0.000134171	0.000134884	0.000133786	0.000124604	0.000134785	0.000143603	0.000144462	0.00013837	0.00014438	D-serine dehydratase [EC:4.3.1.18]
K01754	0.000490366	0.00051903	0.000510384	0.000519178	0.000498609	0.000517737	0.000514409	0.000513982	0.000496766	0.000512718	0.000521394	0.000494678	0.000497154	0.000505411	0.000528571	0.000511501	0.000517687	threonine dehydratase [EC:4.3.1.19]
K01755	0.000210506	0.000219353	0.000212502	0.000218017	0.000209074	0.000211791	0.000219133	0.000224997	0.000211696	0.000219755	0.000216375	0.000209003	0.000204828	0.000210411	0.000220489	0.000209748	0.000218389	argininosuccinate lyase [EC:4.3.2.1]
K01756	0.00023091	0.000250855	0.000234753	0.000239469	0.000251268	0.000218635	0.000238108	0.000238893	0.000228954	0.000235217	0.000223288	0.00022545	0.000228968	0.000251089	0.000238083	0.000226508	0.000226837	adenylosuccinate lyase [EC:4.3.2.2]
K01758	0.000375053	0.000367485	0.000376112	0.000377736	0.000370152	0.000382113	0.000373542	0.000374522	0.000386394	0.000375325	0.000374491	0.000378388	0.000372847	0.000369161	0.000372607	0.000372108	0.000372333	cystathionine gamma-lyase [EC:4.4.1.1]
K01759	0.000624156	0.000541967	0.000603412	0.00055349	0.000557859	0.000602959	0.00057089	0.000553048	0.000660352	0.000586214	0.000553944	0.000627839	0.000610438	0.000552774	0.000518057	0.00057914	0.000572691	lactoylglutathione lyase [EC:4.4.1.5]
K01760	0.000565984	0.000520753	0.000553454	0.00055713	0.000512919	0.000588725	0.000543402	0.000539398	0.000602547	0.000560479	0.000555535	0.00057676	0.000563147	0.000519251	0.000535598	0.000556943	0.00055445	cystathionine beta-lyase [EC:4.4.1.8]
K01761	0.000308499	0.000335776	0.000303757	0.00030805	0.000319956	0.000300632	0.00030193	0.000311399	0.000288861	0.000307456	0.000309775	0.000301524	0.000296876	0.000311336	0.00030887	0.000298605	0.000300532	methionine-gamma-lyase [EC:4.4.1.11]
K01766	2.28293e-05	2.56141e-05	2.36192e-05	2.30946e-05	2.08246e-05	2.12352e-05	2.08893e-05	2.30372e-05	2.18035e-05	2.53623e-05	2.2656e-05	2.11506e-05	1.85202e-05	1.9931e-05	2.17965e-05	2.10598e-05	2.89199e-05	cysteine sulfinate desulfinase [EC:4.4.1.-]
K01768	0.000439886	0.000411664	0.000435882	0.000417337	0.000420205	0.00046843	0.000411955	0.000420555	0.000456934	0.000434071	0.000442683	0.000465517	0.000447994	0.000408144	0.000404571	0.000438147	0.000456024	adenylate cyclase [EC:4.6.1.1]
K01770	0.000182113	0.000182155	0.000185372	0.000186008	0.000176489	0.000187359	0.000183518	0.000182958	0.000189881	0.000187072	0.000183923	0.000185806	0.00018143	0.000178057	0.000182386	0.000182451	0.000186252	2-C-methyl-D-erythritol 2,4-cyclodiphosphate synthase [EC:4.6.1.12]
K01771	1.2203e-05	1.61963e-05	1.14736e-05	1.20483e-05	2.27638e-05	6.71074e-06	1.24859e-05	1.1384e-05	4.85604e-06	8.99371e-06	9.26173e-06	6.13763e-06	1.3841e-05	2.08485e-05	1.4565e-05	1.17803e-05	1.01845e-05	1-phosphatidylinositol phosphodiesterase [EC:4.6.1.13]
K01772	0.000218755	0.000232576	0.000224288	0.000225108	0.000231444	0.000214414	0.00022707	0.000227595	0.000212481	0.000221831	0.00022149	0.000213034	0.000215887	0.000226956	0.000228673	0.00021884	0.000219748	protoporphyrin/coproporphyrin ferrochelatase [EC:4.99.1.1 4.99.1.9]
K01775	0.00022941	0.000220925	0.000230163	0.000220981	0.000211	0.000227841	0.000221635	0.000220021	0.000236577	0.000228954	0.00022419	0.000233359	0.000223758	0.00021408	0.000214281	0.000226373	0.00023078	alanine racemase [EC:5.1.1.1]
K01776	0.00056715	0.000592481	0.000510123	0.000528492	0.000661493	0.000458666	0.000533011	0.000556647	0.000427078	0.00050496	0.000510835	0.000476981	0.000545259	0.000622031	0.000566764	0.000535057	0.000495717	glutamate racemase [EC:5.1.1.3]
K01777	5.20249e-05	6.56591e-05	4.95535e-05	5.075e-05	6.659e-05	3.55899e-05	5.45949e-05	5.80881e-05	3.02363e-05	4.86205e-05	4.80352e-05	3.59376e-05	4.68024e-05	6.76568e-05	5.87958e-05	4.90649e-05	5.35223e-05	proline racemase [EC:5.1.1.4]
K01778	0.000189299	0.000192331	0.000192092	0.000194652	0.000189296	0.000193694	0.000192641	0.00019541	0.000195536	0.000195267	0.000191726	0.000193179	0.000188185	0.000189419	0.00019344	0.000190304	0.000193654	diaminopimelate epimerase [EC:5.1.1.7]
K01779	0.000181577	0.000166748	0.000166001	0.000153421	0.000145829	0.000168814	0.000154862	0.000159368	0.000183755	0.00016935	0.000156648	0.000179681	0.000157791	0.000141394	0.000137486	0.000153653	0.000155875	aspartate racemase [EC:5.1.1.13]
K01781	5.28132e-07	5.08677e-07	4.87553e-07	5.97526e-07	5.82443e-07	7.17874e-07	6.37977e-07	7.02204e-07	4.86432e-07	5.9035e-07	4.99682e-07	5.82919e-07	5.05468e-07	5.40993e-07	6.07274e-07	4.95886e-07	6.12919e-07	mandelate racemase [EC:5.1.2.2]
K01782	0.000336808	0.000350876	0.000349179	0.000324459	0.000359067	0.000303027	0.000349168	0.000339452	0.000316164	0.000327098	0.000315627	0.000313065	0.000332436	0.000358099	0.000334143	0.000332705	0.000334105	3-hydroxyacyl-CoA dehydrogenase / enoyl-CoA hydratase / 3-hydroxybutyryl-CoA epimerase [EC:1.1.1.35 4.2.1.17 5.1.2.3]
K01783	0.000193757	0.000197377	0.000200786	0.000196977	0.000192694	0.000196878	0.000195962	0.000194974	0.000199407	0.000198617	0.000197386	0.000197876	0.000191506	0.000191337	0.000194221	0.000194329	0.000197396	ribulose-phosphate 3-epimerase [EC:5.1.3.1]
K01784	0.000729481	0.000792884	0.000741767	0.000749316	0.000766545	0.000713943	0.000758404	0.000775846	0.000701315	0.000740029	0.000752647	0.000719195	0.000708086	0.000754327	0.000766643	0.000729903	0.000729731	UDP-glucose 4-epimerase [EC:5.1.3.2]
K01785	0.000240828	0.000236912	0.000231212	0.000200878	0.000237752	0.000219654	0.000220276	0.000223254	0.000220459	0.000219421	0.000212611	0.000231399	0.000227642	0.000220379	0.000205415	0.000218807	0.000216454	aldose 1-epimerase [EC:5.1.3.3]
K01788	5.37389e-05	5.20038e-05	6.16413e-05	4.02297e-05	4.4959e-05	4.75299e-05	5.17502e-05	4.33538e-05	6.65356e-05	5.12973e-05	4.11964e-05	6.2098e-05	5.09532e-05	4.56477e-05	3.24251e-05	4.45311e-05	4.48418e-05	N-acylglucosamine-6-phosphate 2-epimerase [EC:5.1.3.9]
K01790	0.000264984	0.000247531	0.00025252	0.000247891	0.00025026	0.000258822	0.000248796	0.000252043	0.000251734	0.000253746	0.00025938	0.000260183	0.000258495	0.000242035	0.000249938	0.00026026	0.000256497	dTDP-4-dehydrorhamnose 3,5-epimerase [EC:5.1.3.13]
K01791	0.000128361	0.000134945	0.000141156	0.000147675	0.000112186	0.000163168	0.00013493	0.000140128	0.000146496	0.000140282	0.000151541	0.000138385	0.000132983	0.000114561	0.000142886	0.000137505	0.000144909	UDP-N-acetylglucosamine 2-epimerase (non-hydrolysing) [EC:5.1.3.14]
K01792	0.000142167	0.000140181	0.00015585	0.000177824	0.00012672	0.000182959	0.000158936	0.000159231	0.000181033	0.000170713	0.000172074	0.000167978	0.000155573	0.000150082	0.000168653	0.000161917	0.000178076	glucose-6-phosphate 1-epimerase [EC:5.1.3.15]
K01795	6.89562e-06	4.72675e-06	6.05127e-06	6.33862e-06	1.84722e-06	7.23918e-06	5.31416e-06	7.40314e-06	7.08023e-06	8.73142e-06	8.32425e-06	6.5086e-06	5.50413e-06	4.42644e-06	5.02156e-06	4.82285e-06	1.17963e-05	mannuronan 5-epimerase [EC:5.1.3.37]
K01796	0.000701476	0.000716546	0.000810966	0.00088203	0.000711128	0.000888881	0.000827136	0.000792453	0.000880875	0.000826141	0.0008487	0.000802681	0.000794986	0.00079754	0.000874914	0.000832965	0.000849249	alpha-methylacyl-CoA racemase [EC:5.1.99.4]
K01799	6.60398e-05	5.9171e-05	5.38851e-05	5.40112e-05	7.4647e-05	4.78798e-05	5.55346e-05	6.13265e-05	4.33266e-05	5.57481e-05	5.43145e-05	5.19687e-05	5.67135e-05	6.74717e-05	5.78727e-05	5.60851e-05	5.68737e-05	maleate isomerase [EC:5.2.1.1]
K01800	0.000170679	0.000157231	0.00018121	0.000199639	0.000154156	0.000211845	0.000181697	0.000178401	0.000211709	0.00019443	0.000194454	0.000195366	0.000187257	0.000170199	0.000190072	0.000191683	0.000202075	maleylacetoacetate isomerase [EC:5.2.1.2]
K01801	0.000142025	0.000122773	0.000138999	0.00014498	0.000122343	0.000159083	0.000134818	0.000135219	0.000160288	0.000148218	0.000144908	0.000152114	0.000144153	0.000126784	0.000135682	0.000145146	0.000152712	maleylpyruvate isomerase [EC:5.2.1.4]
K01802	0.000356076	0.000419433	0.000371879	0.000374077	0.000384495	0.000352885	0.000372634	0.000384085	0.000348391	0.000370316	0.000364542	0.000358528	0.000349281	0.000368472	0.000376497	0.000354527	0.000367415	peptidylprolyl isomerase [EC:5.2.1.8]
K01803	0.000191712	0.000197049	0.0001953	0.000197986	0.00018779	0.000196322	0.000197452	0.000196627	0.000198462	0.000198484	0.000196769	0.000194353	0.00019039	0.000188439	0.000195929	0.000192324	0.000195844	triosephosphate isomerase (TIM) [EC:5.3.1.1]
K01804	3.8745e-05	6.04668e-05	4.57238e-05	3.99143e-05	4.82674e-05	2.94902e-05	4.74981e-05	4.38353e-05	3.26896e-05	4.06069e-05	3.93286e-05	3.83308e-05	3.63885e-05	4.9591e-05	4.31862e-05	3.76683e-05	3.15669e-05	L-arabinose isomerase [EC:5.3.1.4]
K01805	0.000107452	0.000126117	0.000128017	0.000124044	0.000112673	0.000118409	0.000131185	0.000120677	0.00013259	0.000122936	0.00011717	0.000124338	0.000119139	0.000125517	0.000122504	0.000117365	0.000115269	xylose isomerase [EC:5.3.1.5]
K01807	0.000147621	0.000134004	0.000147669	0.000149493	0.000127662	0.000162826	0.000142568	0.000141508	0.00016982	0.000154836	0.000149433	0.00016243	0.000149935	0.000134004	0.000139433	0.000149401	0.000155769	ribose 5-phosphate isomerase A [EC:5.3.1.6]
K01808	7.50783e-05	0.000108752	8.18444e-05	8.04919e-05	0.000107182	5.84231e-05	9.23047e-05	9.18783e-05	5.77655e-05	7.63232e-05	7.49132e-05	6.3365e-05	7.23826e-05	9.94086e-05	9.15984e-05	7.26557e-05	6.73663e-05	ribose 5-phosphate isomerase B [EC:5.3.1.6]
K01809	8.27445e-05	0.000116352	8.93522e-05	8.5979e-05	0.000109489	6.31992e-05	9.72203e-05	9.90503e-05	6.23777e-05	8.41697e-05	8.27443e-05	7.01542e-05	7.58515e-05	0.000105792	9.65352e-05	7.887e-05	7.73187e-05	mannose-6-phosphate isomerase [EC:5.3.1.8]
K01810	0.00018329	0.000195608	0.000190106	0.000190927	0.000200036	0.000182777	0.000191787	0.000191335	0.000181786	0.000188695	0.000186441	0.000183818	0.000188305	0.000198283	0.000194178	0.000187663	0.000190602	glucose-6-phosphate isomerase [EC:5.3.1.9]
K01811	3.84968e-05	5.63266e-05	4.04837e-05	4.35382e-05	5.59364e-05	3.55398e-05	4.60721e-05	4.84547e-05	2.55606e-05	3.883e-05	4.38866e-05	3.25037e-05	4.09559e-05	4.87054e-05	5.04514e-05	4.01844e-05	4.08848e-05	alpha-D-xyloside xylohydrolase [EC:3.2.1.177]
K01812	1.52485e-05	2.49118e-05	1.98278e-05	1.53269e-05	1.60514e-05	1.62819e-05	2.0227e-05	1.63073e-05	2.36752e-05	2.09485e-05	1.48287e-05	2.30423e-05	1.441e-05	1.71059e-05	1.41495e-05	1.43758e-05	1.36475e-05	glucuronate isomerase [EC:5.3.1.12]
K01813	2.57207e-09	3.44822e-08	7.37735e-08	3.24119e-08	2.28623e-08	5.05071e-08	3.56222e-08	3.14166e-08	6.93714e-08	5.71474e-08	1.63454e-08	2.72533e-08	9.00325e-08	1.95363e-08	2.83807e-08	9.53626e-09	4.16072e-08	L-rhamnose isomerase [EC:5.3.1.14]
K01814	0.000222736	0.000239362	0.000228889	0.000229763	0.000238298	0.000219484	0.000232413	0.00023229	0.000218436	0.000227613	0.000227044	0.000219676	0.000220667	0.000232681	0.000234057	0.000224014	0.000224782	phosphoribosylformimino-5-aminoimidazole carboxamide ribotide isomerase [EC:5.3.1.16]
K01815	3.17044e-05	3.44332e-05	3.13993e-05	2.95089e-05	2.54154e-05	3.14948e-05	3.12461e-05	3.09989e-05	3.96117e-05	3.34319e-05	2.69157e-05	3.52425e-05	2.68655e-05	2.64823e-05	2.52558e-05	2.58762e-05	2.53449e-05	4-deoxy-L-threo-5-hexosulose-uronate ketol-isomerase [EC:5.3.1.17]
K01816	0.000131149	0.000127448	0.0001276	0.000106428	0.000120967	0.000114025	0.000116971	0.000118496	0.000124182	0.000124364	0.000112043	0.000132153	0.000119599	0.000119549	0.000100776	0.000114291	0.000121308	hydroxypyruvate isomerase [EC:5.3.1.22]
K01817	0.00020499	0.000218158	0.000211369	0.000210596	0.000204798	0.000214493	0.000211058	0.000210466	0.000211471	0.000213173	0.000215329	0.000213819	0.000206124	0.000202866	0.000210486	0.000209304	0.000212461	phosphoribosylanthranilate isomerase [EC:5.3.1.24]
K01818	2.51742e-07	6.9769e-07	6.39665e-07	4.12425e-07	1.52687e-07	2.86375e-07	5.5876e-07	7.04751e-07	2.70271e-07	4.73284e-07	3.19596e-07	6.81636e-07	2.24224e-07	6.84748e-07	4.17524e-07	1.89363e-07	3.30494e-07	L-fucose/D-arabinose isomerase [EC:5.3.1.25 5.3.1.3]
K01819	2.48224e-06	4.28085e-06	2.63615e-06	2.69621e-06	2.98908e-06	3.08871e-06	3.09007e-06	2.42901e-06	3.5875e-06	3.75947e-06	2.72202e-06	3.57261e-06	2.45e-06	2.70158e-06	3.20647e-06	3.23075e-06	2.68613e-06	galactose-6-phosphate isomerase [EC:5.3.1.26]
K01820	9.55909e-05	8.7084e-05	9.48212e-05	7.37273e-05	8.7725e-05	7.8287e-05	8.81148e-05	8.03655e-05	9.33316e-05	8.1636e-05	7.50445e-05	9.08112e-05	9.30447e-05	8.63176e-05	7.17984e-05	8.5762e-05	7.93429e-05	L-rhamnose isomerase / sugar isomerase [EC:5.3.1.14 5.3.1.-]
K01821	0.000296093	0.000235744	0.000277082	0.000284472	0.000246764	0.000313232	0.000270585	0.000269237	0.000322945	0.00028468	0.000286487	0.00030263	0.000298476	0.000256282	0.000270462	0.000295234	0.000286836	4-oxalocrotonate tautomerase [EC:5.3.2.6]
K01822	4.26883e-05	3.36127e-05	3.43509e-05	3.14713e-05	4.09472e-05	3.92437e-05	3.14533e-05	3.44788e-05	3.22352e-05	3.62235e-05	3.88198e-05	4.06924e-05	3.88727e-05	3.20966e-05	3.19355e-05	3.78399e-05	3.64392e-05	steroid Delta-isomerase [EC:5.3.3.1]
K01823	5.01554e-05	7.37446e-05	5.03429e-05	5.66266e-05	7.1371e-05	4.12577e-05	6.41111e-05	6.68439e-05	3.68106e-05	5.31725e-05	5.48435e-05	4.24092e-05	4.79883e-05	6.55726e-05	6.81752e-05	5.17193e-05	4.70318e-05	isopentenyl-diphosphate Delta-isomerase [EC:5.3.3.2]
K01825	0.000189064	0.000170641	0.000172301	0.000154032	0.0001714	0.000153335	0.000160673	0.000167577	0.000160016	0.000169495	0.000162452	0.000169487	0.000162401	0.000164772	0.000152231	0.000170376	0.000179299	3-hydroxyacyl-CoA dehydrogenase / enoyl-CoA hydratase / 3-hydroxybutyryl-CoA epimerase / enoyl-CoA isomerase [EC:1.1.1.35 4.2.1.17 5.1.2.3 5.3.3.8]
K01826	0.000108012	0.000104832	0.000116536	0.000121464	0.000106915	0.000120605	0.000120577	0.000116158	0.000123158	0.000115647	0.000114793	0.000110727	0.000115428	0.000115208	0.000121534	0.000117152	0.000115489	5-carboxymethyl-2-hydroxymuconate isomerase [EC:5.3.3.10]
K01829	3.47815e-05	3.57346e-05	3.57716e-05	3.324e-05	3.12868e-05	3.76664e-05	3.42232e-05	3.54941e-05	3.13076e-05	3.25167e-05	3.74267e-05	3.06537e-05	3.14359e-05	2.59032e-05	3.34663e-05	3.11497e-05	3.44083e-05	protein disulfide-isomerase [EC:5.3.4.1]
K01834	0.000161909	0.000173004	0.000171842	0.000167493	0.000173124	0.000167583	0.000173432	0.000169628	0.000167813	0.000169586	0.000169458	0.000171898	0.000167009	0.000172141	0.000172117	0.000170057	0.000164006	2,3-bisphosphoglycerate-dependent phosphoglycerate mutase [EC:5.4.2.11]
K01835	4.69212e-05	6.29018e-05	5.72833e-05	4.68722e-05	6.97977e-05	4.37447e-05	5.33214e-05	5.25832e-05	4.18682e-05	4.7835e-05	4.80062e-05	4.68274e-05	4.92717e-05	6.08097e-05	4.96942e-05	4.41202e-05	4.90312e-05	phosphoglucomutase [EC:5.4.2.2]
K01838	0.00014868	0.000174275	0.000162909	0.000167537	0.00018406	0.000161653	0.00016571	0.00017004	0.000138117	0.000152462	0.000162813	0.000144282	0.000170563	0.000180885	0.000181236	0.000165042	0.000169722	beta-phosphoglucomutase [EC:5.4.2.6]
K01839	1.31244e-05	2.12485e-05	1.97074e-05	1.14709e-05	1.22115e-05	1.78747e-05	1.56653e-05	1.35479e-05	1.87386e-05	1.59372e-05	1.52732e-05	2.1154e-05	1.55886e-05	1.25288e-05	9.74957e-06	1.2497e-05	1.48033e-05	phosphopentomutase [EC:5.4.2.7]
K01840	0.000214292	0.000229136	0.000217254	0.000225393	0.000235538	0.000209062	0.0002242	0.000227022	0.000199462	0.00021377	0.00022229	0.000203121	0.000213496	0.000225154	0.000232411	0.000218508	0.000212348	phosphomannomutase [EC:5.4.2.8]
K01841	1.60145e-05	2.19249e-05	1.59532e-05	1.70501e-05	2.64469e-05	1.04958e-05	1.86314e-05	1.75228e-05	7.87471e-06	1.34786e-05	1.4119e-05	9.0777e-06	1.73342e-05	2.43765e-05	2.01781e-05	1.54342e-05	1.40087e-05	phosphoenolpyruvate phosphomutase [EC:5.4.2.9]
K01843	0.000134197	0.000144228	0.000120911	0.000119601	0.000134332	0.000113408	0.000125315	0.000129548	0.00010993	0.000126318	0.000131223	0.000129593	0.000118734	0.000120126	0.000121454	0.00012082	0.000112894	lysine 2,3-aminomutase [EC:5.4.3.2]
K01844	1.02428e-05	1.31839e-05	1.35418e-05	9.48783e-06	1.26313e-05	7.84947e-06	1.07912e-05	1.03883e-05	7.07278e-06	9.74955e-06	1.10779e-05	9.37087e-06	7.72142e-06	1.09688e-05	1.02677e-05	1.00563e-05	9.27945e-06	beta-lysine 5,6-aminomutase alpha subunit [EC:5.4.3.3]
K01845	0.000429743	0.000460343	0.000471072	0.000533722	0.000458456	0.000505713	0.000503926	0.000496803	0.000491912	0.000492552	0.000508357	0.00046229	0.000473408	0.000491962	0.00053861	0.000488186	0.00049651	glutamate-1-semialdehyde 2,1-aminomutase [EC:5.4.3.8]
K01846	3.25399e-05	4.30011e-05	3.00407e-05	3.31398e-05	5.98316e-05	1.92442e-05	3.51198e-05	3.83469e-05	1.39553e-05	2.63664e-05	2.6477e-05	1.82103e-05	3.48975e-05	5.45822e-05	4.28003e-05	3.16372e-05	2.79254e-05	methylaspartate mutase sigma subunit [EC:5.4.99.1]
K01847	0.00016172	0.000213402	0.000185109	0.000190811	0.000234825	0.000153809	0.0001995	0.000197459	0.000139615	0.000173558	0.000179142	0.000145663	0.000169943	0.000224248	0.000216636	0.000179359	0.000171505	methylmalonyl-CoA mutase [EC:5.4.99.2]
K01848	0.00012002	0.000158121	0.000139279	0.000149483	0.00017412	0.000122106	0.000151934	0.000151378	0.000111986	0.000134003	0.00013744	0.000114331	0.000131321	0.000171844	0.000166742	0.000137788	0.000133213	methylmalonyl-CoA mutase, N-terminal domain [EC:5.4.99.2]
K01849	5.02611e-05	6.24061e-05	5.60189e-05	4.86824e-05	8.22742e-05	3.39879e-05	5.351e-05	5.28038e-05	2.72802e-05	4.22674e-05	4.46079e-05	3.26551e-05	4.8385e-05	7.12064e-05	5.68006e-05	4.73883e-05	4.59198e-05	methylmalonyl-CoA mutase, C-terminal domain [EC:5.4.99.2]
K01851	9.49397e-06	1.20453e-05	1.27502e-05	8.17911e-06	1.14229e-05	6.93984e-06	9.65891e-06	9.28358e-06	6.27528e-06	8.64349e-06	9.97118e-06	8.69105e-06	7.08819e-06	9.96906e-06	8.96986e-06	9.32129e-06	8.17686e-06	salicylate biosynthesis isochorismate synthase [EC:5.4.4.2]
K01852	2.10524e-06	3.01604e-06	1.8788e-06	2.5784e-06	4.07819e-06	2.39942e-06	2.46607e-06	2.70211e-06	2.78984e-06	2.63605e-06	2.68007e-06	3.11213e-06	2.43545e-06	3.41234e-06	2.54735e-06	2.46444e-06	2.46239e-06	lanosterol synthase [EC:5.4.99.7]
K01854	0.000154394	0.000138506	0.000122794	0.000122401	0.00014872	0.000131537	0.000124752	0.000132465	0.000115277	0.000134136	0.000145154	0.00014149	0.000135721	0.000126008	0.00012706	0.000137484	0.000131828	UDP-galactopyranose mutase [EC:5.4.99.9]
K01856	1.49528e-05	2.21633e-05	1.91076e-05	1.48698e-05	1.84899e-05	1.77381e-05	1.6159e-05	2.10991e-05	1.12223e-05	1.64401e-05	1.90247e-05	1.7021e-05	1.59145e-05	1.60066e-05	1.88733e-05	1.74934e-05	1.74586e-05	muconate cycloisomerase [EC:5.5.1.1]
K01857	0.000152734	0.000170962	0.000165975	0.000167729	0.000155994	0.00015627	0.000169286	0.000164312	0.000168375	0.000162607	0.00015411	0.000158253	0.000157387	0.000169872	0.000163538	0.000155318	0.000158753	3-carboxy-cis,cis-muconate cycloisomerase [EC:5.5.1.2]
K01858	6.06366e-05	8.39987e-05	6.26839e-05	6.41921e-05	9.43046e-05	4.37318e-05	7.08431e-05	7.38912e-05	3.64177e-05	5.64461e-05	5.9909e-05	4.56698e-05	5.86962e-05	8.52154e-05	7.65975e-05	6.08226e-05	5.41044e-05	myo-inositol-1-phosphate synthase [EC:5.5.1.4]
K01865	1.48666e-07	1.75936e-07	1.55852e-07	1.23298e-07	1.30642e-07	1.4142e-07	1.50631e-07	1.87481e-07	2.44631e-07	2.85945e-07	1.53475e-07	1.54072e-07	9.60347e-08	1.13311e-07	1.05663e-07	9.69974e-08	9.53184e-08	(hydroxyamino)benzene mutase [EC:5.4.4.1]
K01866	0.000166781	0.00017367	0.000174673	0.00017389	0.000169795	0.000172747	0.000173399	0.000171145	0.000174653	0.000175289	0.000173084	0.000174487	0.000170487	0.00017081	0.000172355	0.000171731	0.000176346	tyrosyl-tRNA synthetase [EC:6.1.1.1]
K01867	0.000239538	0.000247832	0.000239226	0.00024136	0.00023838	0.000239765	0.000239979	0.000245021	0.000233563	0.000240606	0.000241083	0.00023384	0.000233652	0.000236997	0.000242582	0.000236563	0.000243017	tryptophanyl-tRNA synthetase [EC:6.1.1.2]
K01868	0.000203358	0.000211124	0.000205518	0.000209113	0.000215279	0.000202674	0.000207806	0.000209669	0.000203114	0.000206682	0.000203404	0.000202305	0.000204409	0.000213434	0.000210142	0.000203773	0.000206111	threonyl-tRNA synthetase [EC:6.1.1.3]
K01869	0.000186162	0.000188607	0.000186927	0.000191845	0.000184341	0.000187719	0.000190142	0.000188353	0.000197064	0.000194218	0.000185693	0.000190501	0.000182436	0.000185892	0.000188939	0.000187167	0.000187103	leucyl-tRNA synthetase [EC:6.1.1.4]
K01870	0.000247489	0.000242979	0.000263368	0.000263448	0.000234598	0.000276762	0.000256814	0.000249543	0.000278324	0.000261269	0.000263813	0.000267968	0.000262378	0.000246271	0.000257017	0.000264265	0.00026923	isoleucyl-tRNA synthetase [EC:6.1.1.5]
K01872	0.000247716	0.00023498	0.00023499	0.000240179	0.000240923	0.00024485	0.000235812	0.000240102	0.000250048	0.000246103	0.000240822	0.000249158	0.000237896	0.000234304	0.000233905	0.000237798	0.000237953	alanyl-tRNA synthetase [EC:6.1.1.7]
K01873	0.00018801	0.000192123	0.000191799	0.000194166	0.000184412	0.000194165	0.000190475	0.000189954	0.000197206	0.000194341	0.000191136	0.0001933	0.000187029	0.000185492	0.000188595	0.000188418	0.000192671	valyl-tRNA synthetase [EC:6.1.1.9]
K01874	0.000218617	0.000237746	0.000223042	0.000232607	0.000220366	0.000220081	0.000235371	0.000236837	0.000220337	0.000229478	0.00022961	0.000217071	0.000214137	0.000217936	0.000235917	0.000219655	0.000223565	methionyl-tRNA synthetase [EC:6.1.1.10]
K01875	0.00018673	0.000188664	0.000189491	0.000191747	0.000185239	0.000192481	0.00018895	0.000188844	0.000195784	0.000192812	0.000189805	0.000192336	0.000186532	0.000185313	0.000188115	0.000187749	0.000191677	seryl-tRNA synthetase [EC:6.1.1.11]
K01876	0.000255972	0.000235815	0.000244553	0.000239536	0.00023921	0.000246021	0.000238551	0.000238325	0.000253815	0.000246227	0.000241713	0.000254882	0.000247371	0.000234334	0.000231976	0.00024617	0.000243776	aspartyl-tRNA synthetase [EC:6.1.1.12]
K01878	0.000144441	0.000146213	0.000151547	0.000151566	0.000130676	0.000158067	0.000149075	0.000145542	0.000163594	0.000156931	0.000154124	0.0001615	0.000148187	0.000137557	0.000145168	0.000150659	0.00015582	glycyl-tRNA synthetase alpha chain [EC:6.1.1.14]
K01879	0.000166234	0.000163186	0.000169343	0.000170865	0.000146868	0.000181043	0.000167661	0.000164906	0.000188058	0.000178113	0.000172041	0.00018176	0.000165325	0.000152852	0.000162482	0.000168717	0.000173416	glycyl-tRNA synthetase beta chain [EC:6.1.1.14]
K01880	3.46224e-05	4.75321e-05	3.71318e-05	3.65419e-05	5.10008e-05	2.47346e-05	4.12023e-05	4.19574e-05	2.00266e-05	3.21433e-05	3.49695e-05	2.42023e-05	3.21668e-05	4.55731e-05	4.37636e-05	3.39782e-05	3.11462e-05	glycyl-tRNA synthetase [EC:6.1.1.14]
K01881	0.000185432	0.000198979	0.000192531	0.000194667	0.000198525	0.000185587	0.00019255	0.000190975	0.000185298	0.000191239	0.000188694	0.000186726	0.000189986	0.000197912	0.000194243	0.000189205	0.000194071	prolyl-tRNA synthetase [EC:6.1.1.15]
K01883	0.000214508	0.00022694	0.000220021	0.000222007	0.000228844	0.000213735	0.000222503	0.000220469	0.000214061	0.000219663	0.000218648	0.000212229	0.000214985	0.000223397	0.000222653	0.000214847	0.000218595	cysteinyl-tRNA synthetase [EC:6.1.1.16]
K01884	3.92563e-07	5.11103e-07	4.45292e-07	6.30709e-07	5.02426e-07	3.75941e-07	5.41966e-07	5.24459e-07	4.12344e-07	5.25236e-07	5.28358e-07	3.70544e-07	2.85675e-07	4.49498e-07	6.29105e-07	3.79407e-07	5.18199e-07	cysteinyl-tRNA synthetase, unknown class [EC:6.1.1.16]
K01885	0.000221126	0.000245992	0.00023506	0.000227797	0.000221812	0.000228269	0.000233913	0.000227734	0.000247654	0.000240085	0.000223708	0.000243225	0.000220069	0.000223938	0.000220917	0.000220295	0.000223915	glutamyl-tRNA synthetase [EC:6.1.1.17]
K01886	0.000137086	0.000116729	0.000132688	0.000139429	0.000117751	0.00015264	0.000128349	0.000129693	0.000152806	0.000140864	0.000139935	0.000146033	0.000140149	0.000121939	0.000131751	0.000140968	0.000147527	glutaminyl-tRNA synthetase [EC:6.1.1.18]
K01887	0.000209805	0.00022088	0.000212569	0.000215151	0.000222747	0.000206306	0.000215067	0.00021949	0.000205283	0.000212723	0.000210034	0.000207285	0.0002088	0.000221134	0.000219269	0.000210723	0.000210376	arginyl-tRNA synthetase [EC:6.1.1.19]
K01889	0.000189276	0.000193722	0.000193634	0.000193663	0.000185387	0.000193447	0.000191637	0.000191525	0.000196136	0.000195159	0.000192709	0.000195038	0.000187455	0.000187231	0.000190713	0.000190773	0.000192407	phenylalanyl-tRNA synthetase alpha chain [EC:6.1.1.20]
K01890	0.000189399	0.000193542	0.000193457	0.000193963	0.000185659	0.000193608	0.000192059	0.000191875	0.0001961	0.000195098	0.00019278	0.000194636	0.00018756	0.000186867	0.000190949	0.000190767	0.000192595	phenylalanyl-tRNA synthetase beta chain [EC:6.1.1.20]
K01892	0.00018436	0.000185406	0.000187473	0.000188818	0.000180841	0.000189958	0.000186226	0.000185964	0.000192916	0.000190002	0.000186809	0.000189125	0.000184048	0.000181719	0.000185149	0.000185066	0.000188933	histidyl-tRNA synthetase [EC:6.1.1.21]
K01893	2.86165e-05	3.87972e-05	2.68404e-05	3.40463e-05	4.48449e-05	2.06909e-05	3.02111e-05	3.49588e-05	1.85312e-05	2.70615e-05	2.59963e-05	2.07971e-05	2.88519e-05	4.02058e-05	3.67913e-05	2.82765e-05	2.86165e-05	asparaginyl-tRNA synthetase [EC:6.1.1.22]
K01894	0.000155096	0.000145445	0.000155737	0.000159647	0.000135288	0.000169639	0.000150236	0.000150834	0.000177439	0.000163303	0.000156933	0.000169415	0.000156634	0.000140927	0.000147886	0.000156337	0.000164228	glutamyl-Q tRNA(Asp) synthetase [EC:6.1.1.-]
K01895	0.000879331	0.000900905	0.000937319	0.00102085	0.000910481	0.000991575	0.000975205	0.000969249	0.00097365	0.000971342	0.000990325	0.000938525	0.000931086	0.00096693	0.00102822	0.000972285	0.000971162	acetyl-CoA synthetase [EC:6.2.1.1]
K01896	3.38228e-07	2.22219e-07	4.38224e-07	1.41554e-07	3.20072e-07	2.32333e-07	3.15511e-07	4.17756e-07	5.48312e-07	4.50945e-07	2.35718e-07	3.13716e-07	3.72134e-07	2.6374e-07	2.5106e-07	1.63479e-07	2.55317e-07	medium-chain acyl-CoA synthetase [EC:6.2.1.2]
K01897	0.00226242	0.0022454	0.0023168	0.00235895	0.00239543	0.00227452	0.00235782	0.00232192	0.0022623	0.00228002	0.00230748	0.00221159	0.00231563	0.00240051	0.00240533	0.00234647	0.00228809	long-chain acyl-CoA synthetase [EC:6.2.1.3]
K01902	0.000193328	0.00019925	0.000197851	0.00019847	0.000193127	0.000196538	0.000197457	0.000199994	0.000198381	0.000199356	0.00019728	0.000198079	0.000191565	0.000193386	0.000197854	0.000194793	0.000196575	succinyl-CoA synthetase alpha subunit [EC:6.2.1.5]
K01903	0.00019654	0.000204368	0.000201266	0.000202523	0.000196222	0.000199352	0.00020241	0.000204672	0.000200801	0.000203082	0.000201658	0.000200348	0.00019434	0.000196309	0.000202618	0.000197947	0.000199632	succinyl-CoA synthetase beta subunit [EC:6.2.1.5]
K01904	1.67066e-05	2.58376e-05	1.80746e-05	1.91954e-05	1.94938e-05	1.32998e-05	2.27859e-05	2.52547e-05	1.10619e-05	1.82003e-05	2.00855e-05	1.43443e-05	1.37779e-05	1.89438e-05	2.37596e-05	1.71731e-05	1.46515e-05	4-coumarate--CoA ligase [EC:6.2.1.12]
K01905	0.000231696	0.000265415	0.00029142	0.000324788	0.000257271	0.000315568	0.000308798	0.000304197	0.000293276	0.000291674	0.000311815	0.000273292	0.000278702	0.000292466	0.000338481	0.000300214	0.000313438	acetate---CoA ligase (ADP-forming) subunit alpha [EC:6.2.1.13]
K01907	0.000214591	0.000240266	0.000239656	0.000282817	0.000248984	0.000256919	0.000265119	0.000260775	0.000243455	0.000250903	0.00026132	0.000228432	0.000245656	0.00027212	0.000292962	0.000255168	0.000251486	acetoacetyl-CoA synthetase [EC:6.2.1.16]
K01908	0.000249218	0.000250119	0.000249081	0.000259076	0.000229752	0.000249726	0.000255867	0.000263918	0.000258089	0.000259065	0.000252351	0.000241529	0.000229854	0.000225805	0.000252079	0.000238046	0.000243207	propionyl-CoA synthetase [EC:6.2.1.17]
K01909	3.86074e-06	5.35547e-06	3.36911e-06	5.31525e-06	4.20299e-06	3.6055e-06	3.74459e-06	4.75212e-06	3.36469e-06	4.06729e-06	3.87639e-06	3.30642e-06	3.23859e-06	3.52807e-06	4.58583e-06	3.89866e-06	4.56463e-06	long-chain-fatty-acid--[acyl-carrier-protein] ligase [EC:6.2.1.20]
K01910	1.69757e-07	2.08426e-07	1.05138e-07	1.15095e-07	2.51485e-07	1.09095e-07	1.7404e-07	1.19723e-07	1.38188e-07	1.1949e-07	1.45388e-07	1.30816e-07	1.57771e-07	1.34801e-07	1.45178e-07	9.80873e-08	1.35224e-07	[citrate (pro-3S)-lyase] ligase [EC:6.2.1.22]
K01911	0.000236612	0.000324679	0.000271545	0.00030412	0.000300407	0.000247647	0.000309364	0.000301522	0.000220591	0.000268591	0.000289203	0.000220849	0.000255288	0.000306782	0.000332654	0.00027171	0.0002683	O-succinylbenzoic acid---CoA ligase [EC:6.2.1.26]
K01912	0.000270081	0.000260565	0.000288288	0.000279712	0.000266226	0.000303574	0.000276321	0.000278071	0.000284741	0.000275169	0.000292502	0.000284678	0.000286231	0.000267351	0.000284874	0.000288289	0.000288765	phenylacetate-CoA ligase [EC:6.2.1.30]
K01915	0.000578144	0.00059602	0.000623672	0.0006465	0.000579236	0.000641818	0.000635311	0.000632326	0.000632888	0.000633587	0.000640101	0.000608628	0.00060801	0.000619716	0.000649324	0.000620553	0.000654238	glutamine synthetase [EC:6.3.1.2]
K01916	0.000268979	0.000234275	0.000259783	0.000267592	0.000239284	0.000281009	0.000256966	0.000253252	0.0002882	0.000271704	0.000271745	0.000285947	0.000273685	0.000248546	0.000255987	0.000273697	0.000272328	NAD+ synthase [EC:6.3.1.5]
K01918	0.000211977	0.000198727	0.00021224	0.00020464	0.000198095	0.000213413	0.000204944	0.000201391	0.000222398	0.00020968	0.000204521	0.000215532	0.000211365	0.00019855	0.000197721	0.000208888	0.000211651	pantoate--beta-alanine ligase [EC:6.3.2.1]
K01919	0.000243648	0.000237334	0.000259032	0.000261252	0.000231713	0.000275391	0.000255116	0.000251392	0.000277292	0.000260445	0.000259683	0.00026568	0.000260292	0.000244794	0.000256224	0.000260156	0.000267205	glutamate--cysteine ligase [EC:6.3.2.2]
K01920	0.000155939	0.000143531	0.00015834	0.000158534	0.000138755	0.000169623	0.000151083	0.000150094	0.000177003	0.000162926	0.000157424	0.000168565	0.000156431	0.000142059	0.000147264	0.000156172	0.000164457	glutathione synthase [EC:6.3.2.3]
K01921	0.000272926	0.000293155	0.000269993	0.000274579	0.000276614	0.000264451	0.000278635	0.000281877	0.000271089	0.00028002	0.000276877	0.000278829	0.000261387	0.00027105	0.000273683	0.000267445	0.000262589	D-alanine-D-alanine ligase [EC:6.3.2.4]
K01923	0.000184692	0.000185843	0.000187764	0.000189032	0.000181117	0.000190174	0.000186508	0.000186256	0.000193238	0.000190235	0.000187099	0.000189438	0.000184358	0.000182031	0.000185381	0.000185394	0.000189161	phosphoribosylaminoimidazole-succinocarboxamide synthase [EC:6.3.2.6]
K01924	0.000340535	0.000333444	0.0003343	0.000348704	0.000324938	0.000355418	0.000334457	0.000338285	0.000358873	0.000353412	0.000348027	0.000356698	0.000337299	0.000326781	0.000337334	0.000339599	0.000347384	UDP-N-acetylmuramate--alanine ligase [EC:6.3.2.8]
K01925	0.000235556	0.000231297	0.000225985	0.000232699	0.000237095	0.000227938	0.000228446	0.000238004	0.000228966	0.000234358	0.000230526	0.000233652	0.000228001	0.000230546	0.000233013	0.000230001	0.000229544	UDP-N-acetylmuramoylalanine--D-glutamate ligase [EC:6.3.2.9]
K01926	3.45273e-05	4.73751e-05	3.6994e-05	3.64717e-05	5.08305e-05	2.46363e-05	4.10619e-05	4.1834e-05	1.98134e-05	3.20322e-05	3.48651e-05	2.40675e-05	3.19899e-05	4.54429e-05	4.36941e-05	3.39005e-05	3.09882e-05	redox-sensing transcriptional repressor
K01928	0.000310947	0.000283978	0.000288223	0.00028069	0.00030315	0.000284493	0.000282481	0.000281684	0.000288988	0.000289353	0.000286897	0.000296316	0.000297051	0.000288731	0.000277563	0.000293172	0.000284189	UDP-N-acetylmuramoyl-L-alanyl-D-glutamate--2,6-diaminopimelate ligase [EC:6.3.2.13]
K01929	0.000210195	0.000221653	0.000213747	0.000222718	0.000210289	0.000211949	0.000213364	0.000220286	0.000214964	0.000218377	0.000212547	0.00021236	0.000206838	0.000208449	0.000218505	0.000211116	0.000217882	UDP-N-acetylmuramoyl-tripeptide--D-alanyl-D-alanine ligase [EC:6.3.2.10]
K01932	4.6083e-09	5.23619e-09	4.89615e-09	5.70516e-09	7.14446e-09	3.45132e-09	7.20926e-09	8.63249e-09	2.89048e-09	2.81407e-09	4.51649e-09	2.27111e-09	4.60881e-09	4.11077e-09	8.73252e-09	5.84664e-09	2.83686e-09	gamma-polyglutamate synthase [EC:6.3.2.-]
K01933	0.000184347	0.00018534	0.000187432	0.000188736	0.000180715	0.000189889	0.000186139	0.000185893	0.000192855	0.000189975	0.000186743	0.000189065	0.00018397	0.000181627	0.000185061	0.000185037	0.000188822	phosphoribosylformylglycinamidine cyclo-ligase [EC:6.3.3.1]
K01934	0.000230483	0.000211552	0.000225986	0.000220526	0.000210023	0.000231713	0.000218997	0.000217293	0.00024189	0.000225498	0.000219186	0.000231293	0.000225697	0.000210356	0.000211336	0.000223124	0.000225094	5-formyltetrahydrofolate cyclo-ligase [EC:6.3.3.2]
K01935	0.000128537	0.000123214	0.000116812	0.000111179	0.000130642	0.000110433	0.000113853	0.000117715	0.000106519	0.000116169	0.000115259	0.000115226	0.000118791	0.000116596	0.000112943	0.000118157	0.00012082	dethiobiotin synthetase [EC:6.3.3.3]
K01937	0.000189686	0.000190401	0.00019524	0.000193536	0.000188187	0.000194132	0.000192129	0.000191513	0.000196416	0.000194479	0.000191757	0.000192894	0.000188136	0.000187251	0.000189837	0.000189153	0.000194567	CTP synthase [EC:6.3.4.2]
K01938	7.11889e-06	1.11819e-05	6.98988e-06	7.75639e-06	1.02973e-05	8.83771e-06	8.90836e-06	7.76e-06	9.9459e-06	9.95097e-06	8.24393e-06	1.02505e-05	7.47884e-06	9.04374e-06	8.83665e-06	9.02141e-06	7.96299e-06	formate--tetrahydrofolate ligase [EC:6.3.4.3]
K01939	0.000227054	0.000241605	0.000246298	0.000257541	0.000225077	0.000259527	0.000249413	0.000244944	0.00025382	0.000250387	0.000256386	0.00024659	0.00024162	0.000236375	0.000256272	0.000247764	0.000253918	adenylosuccinate synthase [EC:6.3.4.4]
K01940	0.000212467	0.000227953	0.000217484	0.00021782	0.000218468	0.000209093	0.000218996	0.000217243	0.000208713	0.000216158	0.000216179	0.00021081	0.000210459	0.000218522	0.000219742	0.000214292	0.000211546	argininosuccinate synthase [EC:6.3.4.5]
K01941	0.000578411	0.00058171	0.000626605	0.000608611	0.000565291	0.000614551	0.00062095	0.00059741	0.000644718	0.000625836	0.000609307	0.000621818	0.000586213	0.000589532	0.000595124	0.000604367	0.000627976	urea carboxylase [EC:6.3.4.6]
K01945	0.00019035	0.000194312	0.000193454	0.000196633	0.000188577	0.000195908	0.00019499	0.000194673	0.000198584	0.000197081	0.000194649	0.000195059	0.000189682	0.000188635	0.00019357	0.000191079	0.000195338	phosphoribosylamine---glycine ligase [EC:6.3.4.13]
K01949	4.2182e-07	5.21575e-07	5.08905e-07	4.40538e-07	2.98298e-07	5.41773e-07	5.87766e-07	5.50215e-07	7.24238e-07	7.21096e-07	4.80469e-07	5.54353e-07	4.15722e-07	4.6122e-07	2.6998e-07	3.87127e-07	3.48933e-07	glutamate---methylamine ligase [EC:6.3.4.12]
K01950	0.000278829	0.000260674	0.000281728	0.000284116	0.000263469	0.000299129	0.00027626	0.000271572	0.00029976	0.000284804	0.000285629	0.00029382	0.000288223	0.000270054	0.000277093	0.000288166	0.000290516	NAD+ synthase (glutamine-hydrolysing) [EC:6.3.5.1]
K01951	0.000314701	0.00032346	0.000329008	0.000338497	0.000291836	0.000337457	0.00033043	0.000326647	0.000352259	0.000339279	0.000328495	0.000333156	0.000316439	0.000307141	0.000325225	0.000321879	0.000333947	GMP synthase (glutamine-hydrolysing) [EC:6.3.5.2]
K01952	0.00029085	0.000341327	0.00030824	0.000299848	0.000324654	0.000279085	0.000315967	0.000310438	0.000289588	0.00030454	0.000293911	0.000292903	0.000284359	0.000316296	0.000306647	0.00028868	0.000284984	phosphoribosylformylglycinamidine synthase [EC:6.3.5.3]
K01953	0.000377686	0.000442754	0.000417083	0.000443146	0.000395443	0.000431833	0.00043069	0.000437685	0.000399898	0.000420669	0.00044796	0.000405323	0.000404782	0.000408632	0.000456601	0.000417057	0.000425268	asparagine synthase (glutamine-hydrolysing) [EC:6.3.5.4]
K01955	0.000215911	0.00022901	0.000220598	0.000221409	0.000228435	0.0002177	0.000222832	0.000227385	0.000211143	0.000219611	0.000220818	0.000212453	0.000218373	0.000223614	0.000227409	0.000217241	0.000221184	carbamoyl-phosphate synthase large subunit [EC:6.3.5.5]
K01956	0.000193156	0.000197928	0.00019787	0.000198404	0.0001891	0.000203522	0.000193277	0.000194903	0.000200298	0.000198574	0.000198726	0.000199334	0.000195234	0.000187981	0.000193927	0.000194861	0.000202709	carbamoyl-phosphate synthase small subunit [EC:6.3.5.5]
K01958	0.000408042	0.000420054	0.000440623	0.000444559	0.000396139	0.000450675	0.000439391	0.000438924	0.000449324	0.000458854	0.000450781	0.000443272	0.000410683	0.000416269	0.000437528	0.000432918	0.000468838	pyruvate carboxylase [EC:6.4.1.1]
K01959	0.000414031	0.000405847	0.000439901	0.000461879	0.000394379	0.000466972	0.000448237	0.000441462	0.000476873	0.000465001	0.000460423	0.000456001	0.000432967	0.000432928	0.000457002	0.000456296	0.000474056	pyruvate carboxylase subunit A [EC:6.4.1.1]
K01960	2.39176e-05	2.78971e-05	2.5893e-05	2.15107e-05	1.66734e-05	2.21852e-05	2.38779e-05	2.55501e-05	2.91995e-05	2.96423e-05	2.30573e-05	2.87483e-05	1.84534e-05	2.26332e-05	1.75182e-05	1.92217e-05	3.05578e-05	pyruvate carboxylase subunit B [EC:6.4.1.1]
K01961	0.000648779	0.00066856	0.000697134	0.000707006	0.000651309	0.000702734	0.000706604	0.00069467	0.000709448	0.000713625	0.000705049	0.000691945	0.000665846	0.000681255	0.000705781	0.000691635	0.000719457	acetyl-CoA carboxylase, biotin carboxylase subunit [EC:6.4.1.2 6.3.4.14]
K01962	0.000303853	0.00028856	0.000299197	0.000283219	0.000291629	0.000289835	0.000286382	0.00028423	0.000302935	0.000289175	0.000282833	0.000298199	0.00029461	0.000286422	0.000276574	0.000294499	0.00028774	acetyl-CoA carboxylase carboxyl transferase subunit alpha [EC:6.4.1.2 2.1.3.15]
K01963	0.000270454	0.000267287	0.00027478	0.000258462	0.000256709	0.000269488	0.000258369	0.000257522	0.000272405	0.000264541	0.000266047	0.000273941	0.000261224	0.000250863	0.000251914	0.000267013	0.000264268	acetyl-CoA carboxylase carboxyl transferase subunit beta [EC:6.4.1.2 2.1.3.15]
K01964	2.06409e-06	2.95321e-06	1.82446e-06	2.52813e-06	4.02049e-06	2.3607e-06	2.41417e-06	2.62116e-06	2.75599e-06	2.58722e-06	2.64193e-06	3.06388e-06	2.40515e-06	3.36025e-06	2.50296e-06	2.40723e-06	2.42646e-06	acetyl-CoA/propionyl-CoA carboxylase [EC:6.4.1.2 6.4.1.3]
K01965	0.000519161	0.000534113	0.000555741	0.000563534	0.000534236	0.000558856	0.000569255	0.000554443	0.000569441	0.000565788	0.000556124	0.000553309	0.000538572	0.000555817	0.000568448	0.000559318	0.000565268	propionyl-CoA carboxylase alpha chain [EC:6.4.1.3]
K01966	0.000191289	0.000203235	0.000197538	0.00019964	0.000234841	0.000182508	0.000204405	0.000199362	0.000179116	0.000191509	0.000190751	0.000179168	0.000195261	0.000221723	0.000208266	0.000195941	0.000191222	propionyl-CoA carboxylase beta chain [EC:6.4.1.3 2.1.3.15]
K01968	0.000704988	0.000699271	0.000738383	0.000740041	0.000701368	0.000746456	0.000742339	0.000727283	0.000759388	0.000752727	0.000740826	0.000744813	0.000717649	0.000721891	0.000735059	0.000739354	0.00075548	3-methylcrotonyl-CoA carboxylase alpha subunit [EC:6.4.1.4]
K01969	0.000271655	0.000293914	0.000307253	0.000331588	0.00030668	0.000316793	0.00032188	0.000310671	0.0003037	0.000312569	0.000315638	0.000288214	0.00029982	0.000321658	0.00033784	0.000310569	0.000321452	3-methylcrotonyl-CoA carboxylase beta subunit [EC:6.4.1.4]
K01971	0.000300695	0.000351894	0.000313106	0.0003139	0.000366049	0.000278104	0.000319054	0.000326706	0.000263131	0.000296505	0.000308205	0.000284774	0.000296405	0.000343102	0.000333928	0.000307615	0.000293693	bifunctional non-homologous end joining protein LigD [EC:6.5.1.1]
K01972	0.000221324	0.000235074	0.000224088	0.000227466	0.000228131	0.000218151	0.00022776	0.00023095	0.000217746	0.000228067	0.000225327	0.000218841	0.000218451	0.000229281	0.000229838	0.00022099	0.00022655	DNA ligase (NAD+) [EC:6.5.1.2]
K01974	0.000122251	8.18409e-05	0.00010061	8.64481e-05	9.35159e-05	0.000109269	8.70892e-05	8.71772e-05	0.00011583	9.64648e-05	9.44012e-05	0.000114735	0.000113952	8.41783e-05	7.6585e-05	0.000104816	0.000101313	RNA 3-terminal phosphate cyclase (ATP) [EC:6.5.1.4]
K01975	0.000167027	0.000168396	0.000153175	0.000146338	0.000171688	0.000137454	0.00015541	0.000156465	0.00014448	0.00015287	0.00014616	0.000147474	0.000152246	0.000160056	0.000148949	0.000148637	0.00014393	RNA 2,3-cyclic 3-phosphodiesterase [EC:3.1.4.58]
K01978	1.30276e-06	2.77237e-06	1.56647e-06	1.9553e-06	1.35214e-06	1.4546e-06	1.44117e-06	1.34837e-06	1.52173e-06	1.42557e-06	1.57948e-06	1.49591e-06	1.11812e-06	1.35387e-06	1.10248e-06	1.16887e-06	1.30117e-06	M1 RNA
K01989	6.64058e-06	1.03974e-05	1.24916e-05	4.79083e-06	6.68351e-06	1.68779e-05	5.1356e-06	6.62126e-06	5.18332e-06	6.36518e-06	1.37913e-05	1.14819e-05	1.27696e-05	2.62194e-06	6.40945e-06	1.02616e-05	1.48243e-05	putative ABC transport system substrate-binding protein
K01990	0.00447383	0.00488761	0.00455971	0.00448834	0.00489274	0.00418241	0.00464951	0.00459413	0.00408304	0.00439094	0.00447936	0.00425322	0.00443771	0.00476321	0.00466861	0.00448528	0.00432687	ABC-2 type transport system ATP-binding protein
K01991	0.000317108	0.00028931	0.000324434	0.000341536	0.000281887	0.000380089	0.000319418	0.000309501	0.000382899	0.000339636	0.000341724	0.000358939	0.000341083	0.000299551	0.00032272	0.000339717	0.000343493	polysaccharide biosynthesis/export protein
K01992	0.0015396	0.00173815	0.0015178	0.00144743	0.00177878	0.00127536	0.00154353	0.00155632	0.00122725	0.00140722	0.00142501	0.00134296	0.00148159	0.00166221	0.00154515	0.00146489	0.00137588	ABC-2 type transport system permease protein
K01993	0.000214509	0.000162131	0.00018885	0.000159773	0.000173913	0.000197616	0.000162065	0.00016343	0.00020503	0.000178064	0.000177629	0.000211525	0.000206657	0.000154652	0.000143471	0.000187088	0.000186838	HlyD family secretion protein
K01994	3.52374e-07	6.3294e-07	4.06417e-07	5.99951e-07	6.02584e-07	4.78807e-07	5.62831e-07	5.62103e-07	4.12344e-07	5.33029e-07	5.04126e-07	3.31885e-07	3.80709e-07	5.48971e-07	5.62156e-07	3.67827e-07	5.71154e-07	LuxR family transcriptional regulator, transcriptional regulator of spore coat protein
K01995	0.00344251	0.00323516	0.00366332	0.00374945	0.00317665	0.00392164	0.00365719	0.00352522	0.00401282	0.00369662	0.00370368	0.003737	0.00362081	0.00342227	0.00363275	0.00367152	0.00371095	branched-chain amino acid transport system ATP-binding protein
K01996	0.00276607	0.00261028	0.00294029	0.00296562	0.00263622	0.00307485	0.00292196	0.00280367	0.00315303	0.00290794	0.0029098	0.00294128	0.00292973	0.00279716	0.00289525	0.00294124	0.00297153	branched-chain amino acid transport system ATP-binding protein
K01997	0.00147827	0.00130766	0.00162051	0.00167197	0.00132678	0.0018267	0.00159336	0.00150699	0.00186546	0.00163878	0.00164141	0.00169645	0.00163939	0.00148639	0.00159223	0.00164771	0.00168193	branched-chain amino acid transport system permease protein
K01998	0.00180571	0.00162148	0.00199152	0.00206054	0.0016405	0.00222482	0.00196997	0.00186201	0.0022722	0.0020139	0.00201748	0.00206161	0.00198905	0.00183012	0.00197019	0.00201577	0.00206217	branched-chain amino acid transport system permease protein
K01999	0.00201862	0.00167778	0.00209416	0.00214168	0.00175576	0.0023636	0.00204508	0.00195454	0.00243255	0.00212766	0.00212199	0.00223111	0.00217111	0.00192433	0.0020313	0.00216442	0.00217754	branched-chain amino acid transport system substrate-binding protein
K02000	0.000652265	0.000664895	0.000649044	0.000615847	0.000664079	0.000580702	0.00063533	0.000626241	0.000622894	0.000631253	0.000593011	0.000627384	0.000620674	0.000672761	0.00060376	0.000617671	0.000611109	glycine betaine/proline transport system ATP-binding protein [EC:3.6.3.32]
K02001	0.000138208	0.00015715	0.000154651	0.000150195	0.000149777	0.000137587	0.000157127	0.000156334	0.000149535	0.000150296	0.000140076	0.00014596	0.000142719	0.000165253	0.000152679	0.000145334	0.00014876	glycine betaine/proline transport system permease protein
K02002	0.000158905	0.000178442	0.000177222	0.00016407	0.000148058	0.000157306	0.000174786	0.000180262	0.000177558	0.000179285	0.000161213	0.000175548	0.000150499	0.000175458	0.000163456	0.000161641	0.000178388	glycine betaine/proline transport system substrate-binding protein
K02003	0.0052035	0.00529007	0.00528855	0.00527154	0.00522791	0.00519514	0.00530823	0.00523511	0.00531235	0.00525916	0.00519172	0.00524315	0.00522874	0.00533052	0.00523567	0.00519855	0.00518081	putative ABC transport system ATP-binding protein
K02004	0.00114156	0.001223	0.00114118	0.00119355	0.00124583	0.00111248	0.00116697	0.00118333	0.00107892	0.00113587	0.00112915	0.00108069	0.00115785	0.00122368	0.00121094	0.00114442	0.00112893	putative ABC transport system permease protein
K02005	0.000227513	0.000221526	0.000233575	0.000228466	0.000202035	0.000261557	0.000215022	0.000222348	0.000256093	0.000235946	0.000235271	0.00025269	0.000231814	0.000197593	0.000209203	0.000223768	0.000244805	HlyD family secretion protein
K02006	0.000266724	0.000346961	0.00030084	0.000299694	0.000367833	0.000243768	0.000314741	0.000309799	0.000229006	0.000274836	0.000278739	0.000237759	0.000273369	0.000346559	0.000324623	0.000275011	0.000267722	cobalt/nickel transport system ATP-binding protein
K02007	4.96031e-05	5.99878e-05	5.76759e-05	4.90273e-05	7.33145e-05	3.6355e-05	5.59494e-05	5.50384e-05	2.98078e-05	4.39432e-05	4.88206e-05	3.30486e-05	4.36116e-05	5.9726e-05	5.66102e-05	4.63699e-05	4.67831e-05	cobalt/nickel transport system permease protein
K02008	3.9446e-05	5.1224e-05	4.37809e-05	4.06577e-05	5.81388e-05	2.85971e-05	4.61461e-05	4.63343e-05	2.31542e-05	3.58719e-05	3.94237e-05	2.68258e-05	3.58919e-05	4.98826e-05	4.7953e-05	3.78568e-05	3.62196e-05	cobalt/nickel transport system permease protein
K02009	1.35887e-05	2.17566e-05	1.5032e-05	1.63792e-05	1.41602e-05	1.16127e-05	1.90093e-05	1.84956e-05	9.93051e-06	1.51529e-05	1.74908e-05	1.19039e-05	1.09339e-05	1.32914e-05	1.87951e-05	1.44944e-05	1.22763e-05	cobalt/nickel transport protein
K02010	0.00250738	0.00252987	0.00262571	0.0025721	0.0024074	0.00262455	0.00261157	0.00256063	0.00276208	0.00264034	0.00256595	0.00269935	0.00253888	0.00251962	0.00250183	0.00251972	0.00257149	iron(III) transport system ATP-binding protein [EC:3.6.3.30]
K02011	0.000251817	0.000255515	0.00025488	0.000242953	0.000240638	0.000245182	0.000252843	0.000249314	0.000266455	0.00025883	0.000244923	0.000267058	0.000240938	0.000243224	0.000232804	0.000237712	0.000242823	iron(III) transport system permease protein
K02012	0.000226032	0.000214844	0.000224228	0.000216563	0.000204094	0.000226056	0.000218354	0.000223441	0.000242915	0.000231931	0.000219276	0.00024107	0.000215563	0.000208004	0.000203802	0.000212086	0.00022286	iron(III) transport system substrate-binding protein
K02013	0.00268058	0.00278617	0.00273498	0.00264055	0.00272961	0.0025761	0.00274555	0.00267172	0.00263512	0.00264125	0.00263415	0.00262125	0.00265671	0.00272892	0.0026584	0.00264826	0.00261238	iron complex transport system ATP-binding protein [EC:3.6.3.34]
K02014	0.00227622	0.0020085	0.00213698	0.00209033	0.0018494	0.00251807	0.0019017	0.00201261	0.00236467	0.00214693	0.0022075	0.00232749	0.00228209	0.00174181	0.00193433	0.00218584	0.00233033	iron complex outermembrane recepter protein
K02015	0.000738095	0.000886788	0.000787982	0.000769786	0.000788942	0.00070694	0.000833529	0.000801096	0.000717204	0.00077279	0.000778846	0.00074309	0.000724243	0.000785741	0.000796959	0.000738437	0.000711639	iron complex transport system permease protein
K02016	0.000766786	0.000929235	0.00084295	0.000825219	0.000795574	0.000764438	0.000875284	0.000839736	0.000809538	0.000835882	0.000815826	0.000815831	0.000761197	0.000833187	0.000828167	0.000777084	0.000771035	iron complex transport system substrate-binding protein
K02017	0.00149152	0.00156026	0.00158328	0.00155447	0.0014245	0.00155878	0.00159015	0.00154046	0.00167049	0.00158545	0.00151663	0.00160249	0.0014902	0.00150615	0.00150416	0.00150138	0.00151391	molybdate transport system ATP-binding protein [EC:3.6.3.29]
K02018	0.000401637	0.000414426	0.00043366	0.000441867	0.000402148	0.000434065	0.000433691	0.000424865	0.000447831	0.000431804	0.000425886	0.000421963	0.000414069	0.000422157	0.000429894	0.000414461	0.000435897	molybdate transport system permease protein
K02019	0.000373728	0.000307606	0.000396612	0.000398117	0.000326096	0.000443758	0.000378794	0.000357441	0.000455843	0.000389799	0.000392141	0.000411071	0.000415614	0.000359248	0.000378639	0.000409783	0.000420972	molybdate transport system regulatory protein
K02020	0.000313154	0.000304966	0.000349741	0.000377661	0.000298836	0.000387407	0.000354375	0.000340964	0.000392559	0.000358515	0.000361868	0.000357084	0.000350115	0.000335893	0.000367612	0.000358704	0.000368779	molybdate transport system substrate-binding protein
K02021	4.18972e-05	6.23966e-05	4.34638e-05	4.61782e-05	5.4882e-05	3.08405e-05	5.30362e-05	5.37666e-05	2.57289e-05	4.17035e-05	4.58787e-05	3.15296e-05	3.79314e-05	5.17473e-05	5.5418e-05	4.27529e-05	3.58046e-05	putative ABC transport system ATP-binding protein
K02022	6.38703e-05	6.79479e-05	6.44528e-05	4.95156e-05	6.05693e-05	7.10684e-05	5.47205e-05	5.40131e-05	6.05003e-05	6.10694e-05	6.61118e-05	7.49762e-05	6.6328e-05	5.12138e-05	4.96184e-05	6.06542e-05	6.39225e-05	HlyD family secretion protein
K02024	0.000185813	0.00011622	0.000148462	0.000123624	0.000139425	0.000158334	0.000128797	0.000127446	0.000170524	0.000144519	0.000140441	0.000172436	0.000169156	0.000127021	0.000110945	0.000156616	0.000151827	maltoporin
K02025	0.00152368	0.0018565	0.00156231	0.00146964	0.00178155	0.00125494	0.00163731	0.00161478	0.00131077	0.00147307	0.00143113	0.00141934	0.00145821	0.0017466	0.00156762	0.0014362	0.00131036	multiple sugar transport system permease protein
K02026	0.00144606	0.00177349	0.00144748	0.00135478	0.00173608	0.00112856	0.00152879	0.00153913	0.0011802	0.00136817	0.00131649	0.00131196	0.00134788	0.00166007	0.00146595	0.00131999	0.0011808	multiple sugar transport system permease protein
K02027	0.000999513	0.00121242	0.0010194	0.000960465	0.00113934	0.000827707	0.00107515	0.00107708	0.000884755	0.000975575	0.000936899	0.000949983	0.00093646	0.0011163	0.00101827	0.000927942	0.000840366	multiple sugar transport system substrate-binding protein
K02028	0.0022966	0.00237912	0.002366	0.00222393	0.00225701	0.00223813	0.0023256	0.0023249	0.00234131	0.00231174	0.00222597	0.002332	0.00222881	0.00228622	0.0022023	0.00221491	0.00223601	polar amino acid transport system ATP-binding protein [EC:3.6.3.21]
K02029	0.0012732	0.0012203	0.00127673	0.00123444	0.00121429	0.00125699	0.00126793	0.00127785	0.00132044	0.00127595	0.00122093	0.00127262	0.00123679	0.00126605	0.00122196	0.00123646	0.00125631	polar amino acid transport system permease protein
K02030	0.00123866	0.0010818	0.00115179	0.00106756	0.00105902	0.00118578	0.00108771	0.00113166	0.00119091	0.00115465	0.00114755	0.00118339	0.00116407	0.00105287	0.00102758	0.00110605	0.0011849	polar amino acid transport system substrate-binding protein
K02031	0.00567229	0.00609937	0.0057671	0.00536438	0.00595082	0.00512363	0.00580519	0.00564401	0.00551552	0.0055254	0.00528848	0.00557054	0.00550057	0.00589174	0.0054142	0.00536661	0.00511479	peptide/nickel transport system ATP-binding protein
K02032	0.00490151	0.00526609	0.00495219	0.00459267	0.0051515	0.00438779	0.00497491	0.00485668	0.00474106	0.00475824	0.00451971	0.00480645	0.00471246	0.00506521	0.00461372	0.00457562	0.00437404	peptide/nickel transport system ATP-binding protein
K02033	0.00106675	0.00120298	0.00111111	0.00103156	0.00111745	0.000961465	0.00113135	0.00108625	0.00105755	0.00106432	0.00101294	0.00106736	0.00103172	0.00112775	0.0010397	0.00101411	0.000954423	peptide/nickel transport system permease protein
K02034	0.00153889	0.00175065	0.00157587	0.00146414	0.00166682	0.00133063	0.00161816	0.00156697	0.00145435	0.00150235	0.00143242	0.00148677	0.0014746	0.00164988	0.00149841	0.00143771	0.00134622	peptide/nickel transport system permease protein
K02035	0.0012251	0.00135607	0.00126823	0.00123538	0.00126575	0.00115052	0.00131468	0.00129205	0.00124211	0.00125599	0.00119898	0.00123059	0.00118562	0.00130195	0.0012461	0.00118517	0.00113939	peptide/nickel transport system substrate-binding protein
K02036	0.000587766	0.000611333	0.000610842	0.000598058	0.000565445	0.000609038	0.000609629	0.00060634	0.000648107	0.000627056	0.000594327	0.000634771	0.000568448	0.000582552	0.000579922	0.000580252	0.000586264	phosphate transport system ATP-binding protein [EC:3.6.3.27]
K02037	0.000224172	0.000213769	0.000225924	0.000218911	0.000216658	0.00022505	0.000220119	0.000216492	0.000232978	0.000222249	0.00021752	0.000226158	0.000221885	0.000212193	0.000211831	0.000220902	0.000225416	phosphate transport system permease protein
K02038	0.000202312	0.000210125	0.000207211	0.000208674	0.000205017	0.000207419	0.000208519	0.000206759	0.00020972	0.000210083	0.000206944	0.00020635	0.000199895	0.000200794	0.00020721	0.000204613	0.00020798	phosphate transport system permease protein
K02039	0.000189365	0.000193645	0.000193427	0.000193884	0.000185558	0.000193515	0.00019162	0.000191191	0.000196273	0.000195144	0.000192962	0.000194733	0.000187686	0.000186946	0.000190849	0.000191027	0.000192534	phosphate transport system protein
K02040	0.000347345	0.000342084	0.000349272	0.000358325	0.000322879	0.000374777	0.000338258	0.000345486	0.000362925	0.000354284	0.000361482	0.000361166	0.000352989	0.000324315	0.00034598	0.000354438	0.000370497	phosphate transport system substrate-binding protein
K02041	0.00115419	0.00111984	0.00115124	0.00108735	0.00110073	0.00111113	0.00111387	0.001091	0.00115805	0.00111151	0.0010859	0.00112927	0.00112626	0.00110584	0.00105591	0.00109864	0.00109654	phosphonate transport system ATP-binding protein [EC:3.6.3.28]
K02042	0.000307492	0.000286511	0.000346644	0.000322221	0.000260037	0.000362955	0.000324756	0.00030136	0.000392553	0.000340707	0.000327464	0.00036367	0.000328977	0.000297448	0.000298397	0.000327307	0.000347307	phosphonate transport system permease protein
K02043	0.000143173	0.000114974	0.000116903	0.000110533	0.000119619	0.000118284	0.000113917	0.000115934	0.000129269	0.000122326	0.000116912	0.000133599	0.000124766	0.000109674	0.00010295	0.000118702	0.000109713	GntR family transcriptional regulator, phosphonate transport system regulatory protein
K02044	0.000264797	0.000234871	0.000280522	0.000263234	0.000228484	0.00029146	0.000261503	0.00024826	0.000316052	0.000275506	0.000266322	0.000295712	0.000273798	0.00024538	0.000243946	0.000272639	0.000283812	phosphonate transport system substrate-binding protein
K02045	0.000998437	0.000950508	0.00104447	0.000986542	0.000854928	0.00105492	0.00100824	0.000967922	0.00117397	0.00103961	0.00098142	0.00110378	0.000998662	0.000925155	0.000913488	0.000980058	0.00100274	sulfate transport system ATP-binding protein [EC:3.6.3.25]
K02046	0.000232042	0.00021398	0.000252158	0.000244314	0.000213514	0.000262897	0.000238591	0.000227666	0.000280373	0.000247635	0.000242515	0.000260643	0.000244412	0.0002255	0.000228177	0.000242768	0.000254415	sulfate transport system permease protein
K02047	0.000163511	0.000150665	0.000166781	0.000162713	0.000140177	0.000179835	0.000158148	0.000158782	0.000178836	0.0001684	0.000169981	0.000173779	0.000163962	0.000144854	0.000153798	0.000163209	0.000178968	sulfate transport system permease protein
K02048	0.00022743	0.000195312	0.000239061	0.00023783	0.000193363	0.00026748	0.000225633	0.000220844	0.000272574	0.000238989	0.0002388	0.000251764	0.000241512	0.000207882	0.000221161	0.000237588	0.00025046	sulfate transport system substrate-binding protein
K02049	0.00414237	0.0040806	0.00431235	0.00411459	0.00395734	0.00424955	0.00421972	0.00406871	0.00453437	0.00423278	0.00407844	0.0043924	0.00419848	0.0041151	0.00396823	0.00411572	0.00412578	NitT/TauT family transport system ATP-binding protein
K02050	0.00122179	0.00102407	0.00122223	0.0011219	0.00102118	0.00125858	0.00115673	0.00108037	0.0013691	0.0011788	0.00114273	0.00128857	0.00124739	0.00107803	0.00105021	0.00120868	0.00119163	NitT/TauT family transport system permease protein
K02051	0.00115899	0.00105711	0.00125599	0.00124432	0.00104034	0.00133801	0.00123723	0.00114594	0.00140741	0.00124224	0.00123164	0.00130213	0.0012723	0.00116599	0.00119779	0.00126931	0.00127963	NitT/TauT family transport system substrate-binding protein
K02052	0.00255278	0.00262851	0.00265176	0.00249411	0.00252069	0.00254509	0.00260361	0.00251226	0.00273872	0.00260407	0.00248569	0.00270565	0.00256331	0.00259065	0.00241087	0.00247636	0.00248205	putative spermidine/putrescine transport system ATP-binding protein
K02053	0.000363589	0.000388207	0.000398449	0.000402651	0.000356108	0.00039527	0.000403916	0.00039883	0.000416706	0.000407935	0.000397307	0.000402519	0.000369812	0.000385611	0.000393511	0.00037754	0.000399226	putative spermidine/putrescine transport system permease protein
K02054	0.000222421	0.000246734	0.000253075	0.000261452	0.000207368	0.000248896	0.00026012	0.000258557	0.00026754	0.000261406	0.000250647	0.000246225	0.000226845	0.000241339	0.000253192	0.000234255	0.00026638	putative spermidine/putrescine transport system permease protein
K02055	0.000182719	0.000200763	0.000214879	0.000221407	0.000158436	0.000221849	0.000222088	0.000214205	0.000242875	0.000224554	0.000217229	0.000219074	0.000195354	0.000194199	0.000211337	0.000198819	0.000219714	putative spermidine/putrescine transport system substrate-binding protein
K02056	0.00143422	0.00141369	0.00150803	0.00138611	0.00137594	0.0014181	0.00146552	0.0013965	0.00152291	0.00141978	0.00138929	0.00148088	0.00144023	0.00140282	0.0013604	0.00142892	0.0013845	simple sugar transport system ATP-binding protein [EC:3.6.3.17]
K02057	0.00102365	0.000942808	0.00104119	0.000923458	0.000922014	0.0009968	0.000992962	0.000937876	0.00109366	0.000983122	0.000940061	0.00106067	0.00101602	0.000941816	0.00088317	0.000982044	0.000959265	simple sugar transport system permease protein
K02058	0.000496442	0.00042206	0.000502189	0.000463622	0.000432491	0.000513102	0.000477071	0.00045125	0.00054736	0.00048114	0.000471328	0.00051842	0.000512005	0.000453897	0.000443098	0.000497431	0.000490303	simple sugar transport system substrate-binding protein
K02062	0.000436617	0.000439504	0.000449093	0.000430718	0.000416393	0.000433048	0.000446052	0.000447721	0.000467793	0.000451503	0.000428692	0.000456228	0.000419342	0.000425838	0.000421578	0.000424838	0.00043788	thiamine transport system ATP-binding protein
K02063	7.3017e-05	9.68201e-05	9.26921e-05	0.000100377	9.08823e-05	8.62004e-05	0.000100365	9.54954e-05	8.68235e-05	9.03743e-05	9.18376e-05	8.18066e-05	8.34995e-05	9.96999e-05	0.000104183	8.77575e-05	8.73777e-05	thiamine transport system permease protein
K02064	7.1814e-05	9.53529e-05	9.15111e-05	9.78731e-05	8.91316e-05	8.54649e-05	9.89571e-05	9.34198e-05	8.60411e-05	8.89571e-05	9.07755e-05	8.12461e-05	8.27707e-05	9.85358e-05	0.000102205	8.67028e-05	8.57614e-05	thiamine transport system substrate-binding protein
K02065	0.000718669	0.000765581	0.000743633	0.000753825	0.000742786	0.000735413	0.000745289	0.000744969	0.000749198	0.000748796	0.000732223	0.000743594	0.000728102	0.000759217	0.000743824	0.000729779	0.000742767	phospholipid/cholesterol/gamma-HCH transport system ATP-binding protein
K02066	0.000347404	0.000355619	0.000375712	0.000393036	0.000370007	0.000390702	0.000371516	0.000368262	0.000366329	0.000374012	0.000391101	0.000359608	0.00036451	0.000365644	0.00039219	0.000379694	0.000397934	phospholipid/cholesterol/gamma-HCH transport system permease protein
K02067	0.000450122	0.000529177	0.000497135	0.000492888	0.000539278	0.0004355	0.000502214	0.0004901	0.000389955	0.000456369	0.000489136	0.000400738	0.000440199	0.000496198	0.000519661	0.000470826	0.000478459	phospholipid/cholesterol/gamma-HCH transport system substrate-binding protein
K02068	0.000126431	0.000141319	0.000139408	0.000145052	0.000157383	0.000133944	0.00014592	0.000142245	0.000124085	0.000130732	0.000133773	0.000120152	0.000143869	0.000157897	0.000153754	0.000139082	0.000141452	putative ABC transport system ATP-binding protein
K02069	1.67548e-05	2.38023e-05	1.70779e-05	1.65051e-05	2.70593e-05	1.02391e-05	1.7791e-05	1.68612e-05	7.80904e-06	1.36636e-05	1.46321e-05	1.13979e-05	1.73169e-05	2.55314e-05	1.96561e-05	1.70239e-05	1.3324e-05	putative ABC transport system permease protein
K02071	0.00108702	0.0011874	0.00120379	0.00122941	0.00112398	0.00117441	0.00123774	0.00118824	0.00120628	0.00118907	0.0011777	0.00113234	0.00114082	0.0012072	0.00123226	0.00116451	0.00118902	D-methionine transport system ATP-binding protein
K02072	0.00020068	0.000170285	0.000188066	0.000187411	0.000176252	0.000203168	0.000184184	0.000183918	0.000205225	0.000189911	0.000189758	0.000196347	0.000198851	0.000178464	0.000183482	0.000197376	0.000194832	D-methionine transport system permease protein
K02073	0.00026006	0.000195629	0.000214404	0.000196809	0.000216847	0.000223264	0.000201892	0.000210348	0.000232291	0.000214803	0.00020765	0.00023165	0.000233182	0.000199754	0.000190071	0.00022425	0.000212617	D-methionine transport system substrate-binding protein
K02074	0.00037489	0.000396076	0.000371684	0.000353055	0.000415294	0.000334408	0.000377723	0.000368568	0.000333032	0.000353331	0.000354156	0.00034834	0.000376562	0.000398862	0.000368374	0.000363863	0.000350596	zinc/manganese transport system ATP-binding protein
K02075	4.95075e-05	6.12549e-05	6.27478e-05	7.59012e-05	4.81411e-05	6.95421e-05	6.95291e-05	6.73719e-05	6.79379e-05	6.84873e-05	7.27198e-05	6.19383e-05	5.80193e-05	6.28338e-05	7.66248e-05	6.66344e-05	7.22406e-05	zinc/manganese transport system permease protein
K02077	5.91086e-05	7.7198e-05	7.37702e-05	8.84784e-05	5.54277e-05	7.73962e-05	8.56386e-05	8.26145e-05	7.36484e-05	7.93405e-05	8.58626e-05	6.7488e-05	6.57117e-05	7.05243e-05	9.17704e-05	7.54773e-05	8.11812e-05	zinc/manganese transport system substrate-binding protein
K02078	0.00079069	0.000785933	0.000770461	0.000790018	0.000790526	0.000780161	0.000779093	0.000785163	0.000765067	0.000780666	0.000797128	0.00077996	0.000792346	0.000790057	0.000797803	0.000798975	0.000780211	acyl carrier protein
K02079	6.33206e-05	5.26784e-05	5.03736e-05	4.90866e-05	5.30954e-05	5.27577e-05	4.98518e-05	5.21292e-05	5.92604e-05	5.55687e-05	5.05778e-05	6.11502e-05	5.26845e-05	4.96552e-05	4.4546e-05	5.01916e-05	4.47577e-05	N-acetylgalactosamine-6-phosphate deacetylase [EC:3.5.1.25]
K02081	0.000170677	0.000199195	0.000161251	0.000166132	0.000209094	0.000130612	0.000177966	0.000191664	0.000121266	0.000154545	0.000155673	0.000131147	0.000160366	0.00019933	0.000188718	0.000160249	0.000151689	DeoR family transcriptional regulator, aga operon transcriptional repressor
K02082	2.40809e-05	2.08865e-05	1.90482e-05	2.36451e-05	1.74619e-05	2.3376e-05	1.90042e-05	2.27259e-05	2.42149e-05	2.17067e-05	2.01824e-05	2.05687e-05	1.92984e-05	1.69486e-05	2.02239e-05	1.96265e-05	2.009e-05	tagatose-6-phosphate ketose/aldose isomerase [EC:5.-.-.-]
K02083	0.000128881	0.000111627	0.000129096	0.00012806	0.000114408	0.000144799	0.000125266	0.000120076	0.000151524	0.000132137	0.000131127	0.000144769	0.000135033	0.00011939	0.000119699	0.000131177	0.000130948	allantoate deiminase [EC:3.5.3.9]
K02099	1.00437e-05	1.66251e-05	1.46569e-05	9.96179e-06	9.59542e-06	9.66624e-06	1.40324e-05	1.19796e-05	1.59404e-05	1.32358e-05	8.90674e-06	1.56554e-05	9.35299e-06	1.14918e-05	7.69226e-06	7.86047e-06	7.99458e-06	AraC family transcriptional regulator, arabinose operon regulatory protein
K02100	2.49338e-05	2.40011e-05	2.09441e-05	2.24275e-05	1.9094e-05	2.40104e-05	2.10718e-05	2.23179e-05	2.51135e-05	2.42785e-05	2.24873e-05	2.40486e-05	2.01799e-05	1.89714e-05	2.16555e-05	2.25728e-05	1.87588e-05	MFS transporter, SP family, arabinose:H+ symporter
K02103	1.49031e-05	1.82585e-05	1.82215e-05	1.6248e-05	1.73781e-05	1.37913e-05	2.02894e-05	1.86509e-05	1.26045e-05	1.66027e-05	1.69716e-05	1.12441e-05	1.20386e-05	1.40644e-05	1.73295e-05	1.32575e-05	1.54628e-05	GntR family transcriptional regulator, arabinose operon transcriptional repressor
K02106	1.71898e-05	1.63097e-05	1.44934e-05	1.61946e-05	7.65156e-06	1.4125e-05	1.25364e-05	1.77951e-05	1.43577e-05	1.91255e-05	1.56409e-05	1.47037e-05	1.02188e-05	1.30835e-05	1.32719e-05	1.40482e-05	2.58922e-05	short-chain fatty acids transporter
K02108	0.00018957	0.000194004	0.000193465	0.000193838	0.000185985	0.000193811	0.000191721	0.00019142	0.000196623	0.000195794	0.000193006	0.000195162	0.000188177	0.000187234	0.000190929	0.000191257	0.000192582	F-type H+-transporting ATPase subunit a
K02109	0.000207973	0.000224259	0.00021665	0.000212663	0.000206893	0.000213589	0.000215314	0.000211481	0.000224902	0.00022079	0.000211467	0.000222727	0.000206199	0.0002088	0.000207805	0.000208889	0.000209357	F-type H+-transporting ATPase subunit b
K02110	0.000212326	0.000218306	0.000228907	0.000242207	0.000211077	0.000242008	0.000231915	0.000227438	0.000243591	0.000235137	0.000235487	0.000231754	0.000226505	0.000224282	0.000238054	0.000230767	0.000237252	F-type H+-transporting ATPase subunit c
K02111	0.000304657	0.000263104	0.00028544	0.000275701	0.000271772	0.000291714	0.000274084	0.000272695	0.000307614	0.000286521	0.000275384	0.00029864	0.00029191	0.00026468	0.000260988	0.00028609	0.000284865	F-type H+-transporting ATPase subunit alpha [EC:3.6.3.14]
K02112	0.000224361	0.000216241	0.000216739	0.000217185	0.000217654	0.000225292	0.000213245	0.000215714	0.000221369	0.000222032	0.000222563	0.00022641	0.000221394	0.000211211	0.000213712	0.000219659	0.000221842	F-type H+-transporting ATPase subunit beta [EC:3.6.3.14]
K02113	0.000192444	0.00019525	0.000197901	0.0001964	0.000188857	0.00019832	0.000196208	0.000194769	0.000201631	0.000200537	0.0001951	0.000198764	0.000189517	0.000189597	0.000192498	0.000193412	0.000196328	F-type H+-transporting ATPase subunit delta
K02114	0.000185007	0.000186398	0.000188107	0.000189782	0.000181733	0.000190646	0.000187044	0.000186788	0.000193616	0.000191475	0.000187633	0.000189933	0.000184925	0.000182592	0.000186118	0.000185778	0.000189629	F-type H+-transporting ATPase subunit epsilon
K02115	0.000184884	0.000186249	0.000187945	0.000189669	0.000181611	0.000190583	0.000186897	0.000186609	0.000193507	0.000191227	0.000187562	0.00018982	0.000184822	0.000182422	0.000186015	0.000185723	0.000189532	F-type H+-transporting ATPase subunit gamma
K02116	0.000159342	0.000147507	0.000160674	0.000156369	0.000153205	0.000168245	0.00015606	0.000152541	0.000172163	0.000162034	0.000157587	0.000166164	0.000162815	0.000156238	0.000152302	0.000158953	0.00016304	ATP synthase protein I
K02117	4.19277e-06	5.49025e-06	3.71602e-06	4.69763e-06	7.369e-06	3.03256e-06	5.27401e-06	8.05633e-06	2.2201e-06	4.33391e-06	4.1199e-06	3.10648e-06	3.71434e-06	6.61505e-06	7.01367e-06	4.20859e-06	3.89185e-06	V/A-type H+/Na+-transporting ATPase subunit A [EC:3.6.3.14 3.6.3.15]
K02118	6.25686e-06	8.44346e-06	5.54048e-06	7.22576e-06	1.13895e-05	5.39326e-06	7.68818e-06	1.06775e-05	4.97609e-06	6.92112e-06	6.76183e-06	6.17036e-06	6.1195e-06	9.9753e-06	9.51663e-06	6.61582e-06	6.31831e-06	V/A-type H+/Na+-transporting ATPase subunit B
K02120	4.19277e-06	5.49025e-06	3.71602e-06	4.69763e-06	7.369e-06	3.03256e-06	5.27401e-06	8.05633e-06	2.2201e-06	4.33391e-06	4.1199e-06	3.10648e-06	3.71434e-06	6.61505e-06	7.01367e-06	4.20859e-06	3.89185e-06	V/A-type H+/Na+-transporting ATPase subunit D
K02123	4.19277e-06	5.49025e-06	3.71602e-06	4.69763e-06	7.369e-06	3.03256e-06	5.27401e-06	8.05633e-06	2.2201e-06	4.33391e-06	4.1199e-06	3.10648e-06	3.71434e-06	6.61505e-06	7.01367e-06	4.20859e-06	3.89185e-06	V/A-type H+/Na+-transporting ATPase subunit I
K02124	4.19277e-06	5.49025e-06	3.71602e-06	4.69763e-06	7.369e-06	3.03256e-06	5.27401e-06	8.05633e-06	2.2201e-06	4.33391e-06	4.1199e-06	3.10648e-06	3.71434e-06	6.61505e-06	7.01367e-06	4.20859e-06	3.89185e-06	V/A-type H+/Na+-transporting ATPase subunit K
K02160	0.000180747	0.000162149	0.000181901	0.000172056	0.00015029	0.000189238	0.000169556	0.000167395	0.000202534	0.000186833	0.000177213	0.000197706	0.000178691	0.000161038	0.000159266	0.000181272	0.000195773	acetyl-CoA carboxylase biotin carboxyl carrier protein
K02164	3.36427e-07	4.2053e-07	2.79191e-07	1.86798e-07	1.54157e-07	1.72128e-07	3.07776e-07	4.00774e-07	3.62285e-07	2.99244e-07	2.69785e-07	3.3673e-07	2.22938e-07	3.43839e-07	2.58483e-07	3.72732e-07	1.95932e-07	nitric oxide reductase NorE protein
K02167	3.26555e-05	4.36855e-05	3.71439e-05	2.94093e-05	3.95066e-05	3.0818e-05	3.33848e-05	3.24083e-05	3.05418e-05	3.33682e-05	3.1456e-05	3.45121e-05	3.40723e-05	3.99306e-05	2.93669e-05	3.06542e-05	3.62358e-05	TetR/AcrR family transcriptional regulator, transcriptional repressor of bet genes
K02168	5.84343e-05	7.12026e-05	6.35932e-05	6.16207e-05	4.81409e-05	5.10489e-05	6.22646e-05	6.72426e-05	5.61549e-05	6.69002e-05	5.88005e-05	5.61198e-05	4.24883e-05	5.25109e-05	5.52934e-05	5.07692e-05	6.92599e-05	choline/glycine/proline betaine transport protein
K02169	0.000444963	0.000433753	0.000427676	0.000409502	0.000450664	0.0003921	0.000424101	0.000433945	0.000390461	0.000408827	0.000412525	0.000406614	0.000419567	0.000432975	0.00042213	0.000425483	0.000410707	malonyl-CoA O-methyltransferase [EC:2.1.1.197]
K02170	6.60171e-05	5.00906e-05	5.84358e-05	5.67262e-05	4.69831e-05	6.0967e-05	5.24646e-05	5.61476e-05	6.89296e-05	5.98928e-05	5.49856e-05	6.20752e-05	5.94629e-05	4.72351e-05	4.78411e-05	5.58072e-05	6.37381e-05	pimeloyl-[acyl-carrier protein] methyl ester esterase [EC:3.1.1.85]
K02171	6.17802e-06	9.00361e-06	5.86334e-06	9.48173e-06	7.34948e-06	5.81571e-06	6.81869e-06	8.21519e-06	5.96323e-06	8.19756e-06	6.57535e-06	5.70771e-06	5.76329e-06	6.22361e-06	8.36423e-06	6.15966e-06	7.34984e-06	BlaI family transcriptional regulator, penicillinase repressor
K02172	2.76694e-06	5.28204e-06	3.2878e-06	4.4469e-06	3.30476e-06	3.05432e-06	3.45646e-06	3.68084e-06	3.2457e-06	3.49194e-06	3.28597e-06	3.00038e-06	2.55756e-06	2.89625e-06	3.35028e-06	2.69032e-06	3.32604e-06	bla regulator protein blaR1
K02173	3.97385e-07	7.06247e-07	5.27017e-07	6.87926e-07	6.90223e-07	5.66016e-07	6.30513e-07	6.33427e-07	5.36657e-07	6.27582e-07	6.21555e-07	4.30805e-07	5.17758e-07	6.66351e-07	6.2583e-07	4.26634e-07	6.70444e-07	putative kinase
K02182	0.000138315	0.000172078	0.000170746	0.000188671	0.000167866	0.000164374	0.000181759	0.000175077	0.000152773	0.000166605	0.000178904	0.00014467	0.000156654	0.000183594	0.000199323	0.00017097	0.000173772	carnitine-CoA ligase [EC:6.2.1.48]
K02188	3.97074e-05	3.04902e-05	2.97726e-05	2.76352e-05	3.60776e-05	3.52273e-05	2.71054e-05	2.99791e-05	2.84566e-05	3.18126e-05	3.52248e-05	3.75597e-05	3.67071e-05	2.96301e-05	2.78965e-05	3.41367e-05	3.23015e-05	cobalt-precorrin-5B (C1)-methyltransferase [EC:2.1.1.195]
K02189	0.000103024	9.3977e-05	8.423e-05	8.08386e-05	0.00010906	8.29638e-05	8.43964e-05	8.97217e-05	7.85186e-05	8.8132e-05	8.77281e-05	9.46624e-05	9.56291e-05	9.65484e-05	8.29942e-05	8.75988e-05	8.05826e-05	cobalt-precorrin 5A hydrolase [EC:3.7.1.12]
K02191	1.22745e-07	1.71219e-07	1.60996e-07	1.76391e-07	2.19913e-07	1.03932e-07	1.97732e-07	2.5888e-07	9.71817e-08	1.19259e-07	1.32914e-07	1.14868e-07	1.2676e-07	1.67958e-07	2.12127e-07	1.7082e-07	1.04964e-07	cobalt-precorrin-6B (C15)-methyltransferase [EC:2.1.1.196]
K02192	0.000148181	0.000130293	0.000140403	0.00015169	0.000139874	0.000151389	0.00014129	0.000144781	0.000154387	0.000147927	0.000143287	0.000145462	0.000148269	0.00014431	0.000146655	0.000148261	0.000151207	bacterioferritin-associated ferredoxin
K02193	0.00047048	0.000467393	0.000456837	0.000451483	0.000498141	0.000433628	0.00045421	0.000454233	0.000434017	0.000451811	0.000448552	0.000446406	0.000464431	0.00049143	0.000463007	0.000466638	0.000453403	heme exporter protein A [EC:3.6.3.41]
K02194	0.000137665	0.000115168	0.000114324	0.000107867	0.000119834	0.000114413	0.000109726	0.000111686	0.000127777	0.000124208	0.000112983	0.000134575	0.000120912	0.000110108	9.86881e-05	0.000117039	0.000115492	heme exporter protein B
K02195	0.000143694	0.000121387	0.000122475	0.000113812	0.000129135	0.000119688	0.000116261	0.000117853	0.000132284	0.000129783	0.000119023	0.000138666	0.000125892	0.000116456	0.000104694	0.000122238	0.000122337	heme exporter protein C
K02196	0.000130503	0.000104693	0.000106701	9.80092e-05	0.000110472	0.000108117	0.00010196	0.000102744	0.000119919	0.000116016	0.000105406	0.000127178	0.000114368	0.000102084	9.0389e-05	0.000110192	0.000107537	heme exporter protein D
K02197	0.000148051	0.000132624	0.00012928	0.000118389	0.000130323	0.00012457	0.000123927	0.000123874	0.000144292	0.000138083	0.000122453	0.00015062	0.000130706	0.00012223	0.000106993	0.000125493	0.000124117	cytochrome c-type biogenesis protein CcmE
K02198	0.00018419	0.00015809	0.0001536	0.000143687	0.000163669	0.00015108	0.000148547	0.00015078	0.000169975	0.000166484	0.000151612	0.000182385	0.000161178	0.000150064	0.000132194	0.000154759	0.000149322	cytochrome c-type biogenesis protein CcmF
K02199	0.000395989	0.000356857	0.000369847	0.000379637	0.000374187	0.00038651	0.000370387	0.00037358	0.000398672	0.000395422	0.000382549	0.000405058	0.000386355	0.000368522	0.000365587	0.000381696	0.000384466	cytochrome c biogenesis protein CcmG, thiol:disulfide interchange protein DsbE
K02200	0.000313131	0.000261547	0.000270169	0.000242002	0.000266496	0.00026214	0.000253357	0.000251649	0.00030184	0.000282596	0.000253828	0.00031149	0.000278827	0.000247936	0.000218428	0.000265535	0.000262556	cytochrome c-type biogenesis protein CcmH
K02203	6.11328e-06	4.60414e-06	5.86691e-06	5.26087e-06	1.7046e-06	5.70983e-06	4.70077e-06	6.46008e-06	5.88334e-06	7.57116e-06	7.15656e-06	5.86865e-06	4.18423e-06	4.00837e-06	4.35061e-06	4.42051e-06	1.08872e-05	phosphoserine / homoserine phosphotransferase [EC:3.1.3.3 2.7.1.39]
K02204	0.000149011	0.000134209	0.000145577	0.000147488	0.000140247	0.000158338	0.000143266	0.000143233	0.000155708	0.00014943	0.000149672	0.000152585	0.000152491	0.000144506	0.000146184	0.000152453	0.000153321	homoserine kinase type II [EC:2.7.1.39]
K02205	2.15343e-05	2.97935e-05	2.14101e-05	2.15994e-05	3.50075e-05	1.36007e-05	2.35657e-05	2.55961e-05	1.07582e-05	1.8611e-05	1.91627e-05	1.49305e-05	2.15876e-05	3.26024e-05	2.70967e-05	2.15764e-05	1.77851e-05	arginine/ornithine permease
K02217	4.81235e-06	3.95549e-06	6.76272e-06	3.72936e-06	7.059e-06	3.57523e-06	4.51147e-06	3.9251e-06	3.16112e-06	3.73293e-06	4.39261e-06	2.90702e-06	3.71105e-06	4.66006e-06	3.8001e-06	3.80542e-06	4.9998e-06	ferritin [EC:1.16.3.2]
K02221	9.49097e-05	0.000124897	0.000118659	0.000119569	0.00010847	0.0001144	0.000121681	0.000117325	0.000110221	0.000118015	0.000118874	0.000109424	0.000104369	0.000117851	0.000124326	0.000111388	0.000116647	YggT family protein
K02224	0.00018885	0.000187263	0.00018151	0.000159412	0.000187963	0.000157976	0.000176074	0.000172309	0.000162138	0.000169512	0.000168207	0.000170861	0.000177186	0.00017571	0.0001621	0.000171668	0.000168057	cobyrinic acid a,c-diamide synthase [EC:6.3.5.9 6.3.5.11]
K02225	7.85119e-05	7.96172e-05	6.55357e-05	6.80045e-05	8.81919e-05	6.44468e-05	6.63702e-05	7.73355e-05	5.41451e-05	6.92122e-05	7.24117e-05	6.79852e-05	7.25995e-05	8.00574e-05	7.359e-05	7.15683e-05	7.25385e-05	cobalamin biosynthetic protein CobC
K02226	0.000147291	0.000143567	0.000146397	0.000152456	0.00014995	0.000153345	0.000148784	0.000152433	0.000147682	0.000150444	0.000154056	0.000149504	0.00015301	0.000153133	0.00015544	0.000154274	0.000156608	alpha-ribazole phosphatase [EC:3.1.3.73]
K02227	0.000271148	0.000245386	0.000274698	0.000273306	0.000251083	0.00029267	0.000266621	0.000262548	0.000291446	0.000274825	0.000277398	0.000284396	0.000280859	0.000259595	0.000265703	0.000278401	0.000282242	adenosylcobinamide-phosphate synthase [EC:6.3.1.10]
K02228	4.49479e-05	6.37824e-05	5.1866e-05	4.69406e-05	6.06283e-05	3.56586e-05	5.49798e-05	5.37201e-05	3.72601e-05	4.62497e-05	4.53799e-05	4.03976e-05	4.2865e-05	5.69341e-05	5.1722e-05	4.20658e-05	3.98499e-05	precorrin-6A synthase [EC:2.1.1.152]
K02229	2.9307e-05	4.35325e-05	3.77664e-05	3.11829e-05	3.14348e-05	2.66549e-05	3.80766e-05	3.49579e-05	3.11738e-05	3.41249e-05	3.31865e-05	3.2386e-05	2.60597e-05	3.09965e-05	3.11404e-05	2.68783e-05	2.67866e-05	precorrin-3B synthase [EC:1.14.13.83]
K02230	0.000137844	0.000130022	0.000128026	0.000113211	0.000134376	0.000121772	0.000123842	0.000122629	0.000125032	0.000124171	0.000120138	0.000129576	0.000127412	0.000122221	0.000113553	0.00012277	0.000115984	cobaltochelatase CobN [EC:6.6.1.2]
K02231	0.000156348	0.000156922	0.000162996	0.00016012	0.000156698	0.000162184	0.000160882	0.000158958	0.000162398	0.000161493	0.000161525	0.000162793	0.000160548	0.000160552	0.000158814	0.000159971	0.000164354	adenosylcobinamide kinase / adenosylcobinamide-phosphate guanylyltransferase [EC:2.7.1.156 2.7.7.62]
K02232	0.000190952	0.000179236	0.000184978	0.000183106	0.000186562	0.000186793	0.000183077	0.000183348	0.000185875	0.000187678	0.000187868	0.000191083	0.000188924	0.00018514	0.000181662	0.000187279	0.000187319	adenosylcobyric acid synthase [EC:6.3.5.10]
K02233	0.000156636	0.000157007	0.000162948	0.000160507	0.000156999	0.000162388	0.000160965	0.000158957	0.000162571	0.000161603	0.000161786	0.000162638	0.000160778	0.000160417	0.000159074	0.000160497	0.000164571	adenosylcobinamide-GDP ribazoletransferase [EC:2.7.8.26]
K02234	0.000228058	0.00021461	0.000229702	0.000214535	0.000201938	0.000242503	0.000221668	0.000219541	0.000240014	0.000230946	0.000231656	0.000238418	0.000230897	0.000207311	0.00021017	0.000225536	0.000242613	cobalamin biosynthesis protein CobW
K02237	0.000154488	0.000152546	0.000156831	0.000161988	0.000159413	0.000160322	0.000157063	0.000157885	0.000154657	0.000158146	0.000161996	0.000156005	0.000159243	0.000158032	0.000162973	0.000161545	0.000166587	competence protein ComEA
K02238	0.000252784	0.00024839	0.000259639	0.000278653	0.000241252	0.000282917	0.000263489	0.000264763	0.000287111	0.000271225	0.000269597	0.000268421	0.000259686	0.000253819	0.00026967	0.000262922	0.000268655	competence protein ComEC
K02242	5.93491e-05	5.66238e-05	6.09178e-05	5.00237e-05	4.75636e-05	5.52867e-05	5.39436e-05	5.20685e-05	6.91083e-05	5.99148e-05	4.99952e-05	6.55254e-05	5.51672e-05	4.89023e-05	4.31252e-05	5.35869e-05	5.88155e-05	competence protein ComFC
K02243	0.000173385	0.000131396	0.000147224	0.000128872	0.000144459	0.000162268	0.000127901	0.000130406	0.000157254	0.000143281	0.000148919	0.000168891	0.000167231	0.000123301	0.000120813	0.000153927	0.000152885	competence protein ComGA
K02246	2.84707e-05	1.43885e-05	2.55041e-05	1.67003e-05	1.81222e-05	2.44522e-05	1.98853e-05	1.64312e-05	3.06463e-05	2.07538e-05	1.85586e-05	2.7372e-05	2.80387e-05	1.7642e-05	1.33149e-05	2.45809e-05	2.3503e-05	competence protein ComGD
K02257	0.000201012	0.00019214	0.000204678	0.000194728	0.000189018	0.000201775	0.000197092	0.00019294	0.000210305	0.000202723	0.00019667	0.000206691	0.000201134	0.000192234	0.000188949	0.000200671	0.000209339	heme o synthase [EC:2.5.1.141]
K02258	0.000129465	0.000122138	0.000135021	0.000133755	0.000113901	0.000144844	0.000128914	0.000125668	0.000151133	0.000139145	0.000134598	0.000146371	0.000135052	0.000120996	0.000125053	0.000134507	0.000142076	cytochrome c oxidase assembly protein subunit 11
K02259	0.000174001	0.000185211	0.000182366	0.000183091	0.000176795	0.000179152	0.000184594	0.000181711	0.000180103	0.000183712	0.000182965	0.000179595	0.000176742	0.000177377	0.00018317	0.000178837	0.000183241	cytochrome c oxidase assembly protein subunit 15
K02274	0.000599161	0.000540897	0.000555059	0.000541691	0.000578508	0.00055989	0.00054808	0.000550956	0.000567817	0.0005577	0.000549857	0.000576163	0.000584855	0.000558547	0.000537865	0.000569301	0.00055737	cytochrome c oxidase subunit I [EC:1.9.3.1]
K02275	0.000420672	0.000359123	0.000407315	0.000382263	0.000376215	0.000421511	0.000387	0.000371394	0.000448089	0.00040257	0.000392029	0.000436813	0.000423271	0.000374561	0.000361917	0.000410169	0.000407133	cytochrome c oxidase subunit II [EC:1.9.3.1]
K02276	0.000233519	0.000209683	0.000235609	0.000215533	0.000211727	0.000231967	0.00022306	0.000214106	0.000247323	0.000229831	0.00021895	0.000239132	0.000232135	0.000213709	0.000205626	0.000228812	0.000238056	cytochrome c oxidase subunit III [EC:1.9.3.1]
K02277	2.14897e-06	3.11336e-06	2.00691e-06	2.66108e-06	4.15875e-06	2.48865e-06	2.5536e-06	2.81448e-06	2.89307e-06	2.74203e-06	2.73456e-06	3.18763e-06	2.55578e-06	3.48398e-06	2.62012e-06	2.5312e-06	2.53993e-06	cytochrome c oxidase subunit IV [EC:1.9.3.1]
K02278	3.39464e-05	4.94957e-05	4.19812e-05	3.17138e-05	3.55144e-05	4.47724e-05	3.59639e-05	3.50286e-05	4.26421e-05	4.13085e-05	4.15886e-05	4.88674e-05	3.75251e-05	3.35707e-05	3.02214e-05	3.56376e-05	4.51079e-05	prepilin peptidase CpaA [EC:3.4.23.43]
K02279	0.000109404	0.000128391	0.00010196	9.98451e-05	0.000137238	9.89385e-05	0.000105588	0.000108635	9.04341e-05	0.000104461	0.000105614	0.000106173	0.000109317	0.00012246	0.000106434	0.00010457	0.000105804	pilus assembly protein CpaB
K02280	0.000102833	0.000114095	0.000115994	0.000112805	0.000100817	0.000134931	0.000110952	0.000107093	0.000124709	0.00012102	0.000125716	0.000130293	0.000116634	0.000104025	0.000112281	0.000117499	0.000127304	pilus assembly protein CpaC
K02281	6.71504e-06	1.12667e-05	7.23758e-06	7.08366e-06	7.60802e-06	8.16753e-06	8.11698e-06	6.733e-06	9.7564e-06	9.59806e-06	7.29917e-06	9.20505e-06	6.49892e-06	7.10699e-06	7.36406e-06	7.76097e-06	6.82472e-06	pilus assembly protein CpaD
K02282	0.000111182	0.000121293	0.000129637	0.00012137	0.000117141	0.000134488	0.000123923	0.000116044	0.000133023	0.000123459	0.000123878	0.000128264	0.000127087	0.000122667	0.000121223	0.000125047	0.000134649	pilus assembly protein CpaE
K02283	0.000260794	0.000292305	0.000297471	0.000285887	0.00029765	0.000284176	0.000293476	0.000281522	0.000280885	0.000284727	0.000287829	0.000278827	0.00027599	0.000293882	0.000293952	0.000282523	0.000288422	pilus assembly protein CpaF
K02291	0.000207588	0.000225477	0.000213158	0.000210311	0.000229237	0.000212517	0.000218347	0.000222364	0.00020642	0.000213674	0.000211742	0.000213212	0.000213165	0.000225005	0.000222445	0.000213542	0.000205655	15-cis-phytoene synthase [EC:2.5.1.32]
K02292	6.42961e-06	9.97325e-06	6.43239e-06	7.87656e-06	8.40079e-06	7.10315e-06	7.77429e-06	7.40051e-06	8.01512e-06	8.55195e-06	6.56271e-06	7.69596e-06	5.96558e-06	6.56844e-06	8.76152e-06	7.74903e-06	7.30056e-06	beta-carotene ketolase (CrtO type)
K02293	4.81076e-05	4.08303e-05	3.46881e-05	3.67002e-05	5.53087e-05	3.30343e-05	3.63062e-05	3.75921e-05	3.01266e-05	3.67915e-05	3.73148e-05	3.72341e-05	4.39499e-05	4.82482e-05	3.89674e-05	4.08724e-05	3.4661e-05	15-cis-phytoene desaturase [EC:1.3.5.5]
K02294	6.19355e-06	6.93169e-06	8.4685e-06	5.81827e-06	8.47537e-06	5.16788e-06	6.06595e-06	5.39347e-06	4.88486e-06	5.41341e-06	6.03919e-06	4.52284e-06	4.9012e-06	6.10901e-06	4.9557e-06	5.03242e-06	6.34699e-06	beta-carotene hydroxylase [EC:1.14.13.-]
K02297	9.71546e-05	6.78809e-05	7.62275e-05	7.33738e-05	7.29024e-05	8.17534e-05	6.99089e-05	7.54153e-05	8.83417e-05	8.19983e-05	7.53883e-05	8.69984e-05	8.33377e-05	6.90211e-05	6.57254e-05	8.08633e-05	8.11004e-05	cytochrome o ubiquinol oxidase subunit II [EC:1.10.3.10]
K02298	0.000217956	0.000164268	0.000174014	0.000162139	0.000181838	0.000178726	0.000164832	0.000171591	0.000196001	0.000185213	0.000170855	0.000203994	0.000190514	0.000167039	0.000151465	0.000183261	0.0001732	cytochrome o ubiquinol oxidase subunit I [EC:1.10.3.10]
K02299	9.71571e-05	6.79154e-05	7.63013e-05	7.34062e-05	7.29253e-05	8.18039e-05	6.99445e-05	7.54467e-05	8.8411e-05	8.20555e-05	7.54047e-05	8.70256e-05	8.34278e-05	6.90407e-05	6.57538e-05	8.08729e-05	8.1142e-05	cytochrome o ubiquinol oxidase subunit III
K02300	9.71546e-05	6.78809e-05	7.62275e-05	7.33738e-05	7.29024e-05	8.17534e-05	6.99089e-05	7.54153e-05	8.83417e-05	8.19983e-05	7.53883e-05	8.69984e-05	8.33377e-05	6.90211e-05	6.57254e-05	8.08633e-05	8.11004e-05	cytochrome o ubiquinol oxidase subunit IV
K02302	0.000233574	0.000257476	0.000236819	0.000239052	0.000236274	0.000232606	0.000242425	0.000247592	0.000241621	0.000250903	0.000238944	0.000246425	0.000223406	0.000236389	0.000236942	0.000226746	0.000232325	uroporphyrin-III C-methyltransferase / precorrin-2 dehydrogenase / sirohydrochlorin ferrochelatase [EC:2.1.1.107 1.3.1.76 4.99.1.4]
K02303	0.00034428	0.000350227	0.000340413	0.000321293	0.000367093	0.000323102	0.000331333	0.000338606	0.000318059	0.000334371	0.000330457	0.00033613	0.000333958	0.000346382	0.000326279	0.00032574	0.00033094	uroporphyrin-III C-methyltransferase [EC:2.1.1.107]
K02304	4.17829e-05	5.36647e-05	4.59076e-05	4.23893e-05	5.00062e-05	3.23166e-05	4.2844e-05	4.32141e-05	3.67237e-05	4.2375e-05	3.6547e-05	3.71379e-05	3.79059e-05	4.909e-05	4.00925e-05	3.66823e-05	4.36176e-05	precorrin-2 dehydrogenase / sirohydrochlorin ferrochelatase [EC:1.3.1.76 4.99.1.4]
K02305	3.76787e-05	2.72428e-05	2.65775e-05	2.79628e-05	3.52986e-05	2.76087e-05	2.62911e-05	3.00029e-05	2.69759e-05	3.03487e-05	3.05611e-05	3.28007e-05	3.14737e-05	2.91609e-05	2.76068e-05	3.09104e-05	2.7015e-05	nitric oxide reductase subunit C
K02313	0.000222874	0.000216804	0.000228332	0.000215231	0.000208658	0.000224025	0.000219971	0.000214045	0.000239974	0.000224215	0.00021495	0.000232805	0.000221751	0.000211063	0.000206138	0.000217664	0.000220643	chromosomal replication initiator protein
K02314	0.000229945	0.000249474	0.000234097	0.000237543	0.000250183	0.0002263	0.000238489	0.000239116	0.000217534	0.000230435	0.0002335	0.000219601	0.000233666	0.000243332	0.000244103	0.00023133	0.000234235	replicative DNA helicase [EC:3.6.4.12]
K02315	0.000349561	0.000354129	0.000422888	0.000516639	0.000360777	0.000516024	0.00045234	0.000431721	0.000496906	0.000459745	0.000491139	0.000450252	0.000444541	0.000438305	0.000512029	0.000470653	0.000479982	DNA replication protein DnaC
K02316	0.000203202	0.000208259	0.000207855	0.000207978	0.000213404	0.000201967	0.000205539	0.000204477	0.000202609	0.000205244	0.00020227	0.00019937	0.000203128	0.000209194	0.000206329	0.000202385	0.00020653	DNA primase [EC:2.7.7.-]
K02319	2.06409e-06	2.95321e-06	1.82446e-06	2.52813e-06	4.02049e-06	2.3607e-06	2.41417e-06	2.62116e-06	2.75599e-06	2.58722e-06	2.64193e-06	3.06388e-06	2.40515e-06	3.36025e-06	2.50296e-06	2.40723e-06	2.42646e-06	DNA polymerase, archaea type [EC:2.7.7.7]
K02334	2.73707e-05	3.15259e-05	4.00679e-05	5.2207e-05	2.91973e-05	5.12287e-05	4.44606e-05	4.04666e-05	4.9771e-05	4.3644e-05	4.71894e-05	4.1328e-05	4.13269e-05	4.16664e-05	5.16568e-05	4.49131e-05	4.72384e-05	DNA polymerase bacteriophage-type [EC:2.7.7.7]
K02335	0.000289085	0.000327652	0.000298486	0.000301315	0.000335293	0.000265843	0.000304738	0.000307613	0.000257559	0.000287444	0.000290641	0.00026595	0.00028239	0.000318763	0.000313329	0.000288393	0.000285813	DNA polymerase I [EC:2.7.7.7]
K02336	5.52953e-06	7.66016e-06	7.66538e-06	5.32239e-06	6.9338e-06	1.17146e-05	5.00136e-06	5.71188e-06	5.9813e-06	6.03857e-06	1.03552e-05	9.0259e-06	9.79497e-06	4.47773e-06	5.59099e-06	6.97555e-06	1.03605e-05	DNA polymerase II [EC:2.7.7.7]
K02337	0.000203109	0.000212349	0.000206854	0.000208517	0.000210816	0.00020285	0.000206652	0.000206159	0.000203061	0.000206589	0.000204691	0.000202991	0.00020388	0.000209526	0.000208059	0.000204397	0.000205	DNA polymerase III subunit alpha [EC:2.7.7.7]
K02338	0.000219663	0.000235888	0.000222669	0.000226999	0.00023422	0.000215613	0.000228713	0.000232751	0.000214396	0.000224441	0.000223001	0.000216133	0.00021792	0.000231652	0.000232744	0.0002209	0.000219975	DNA polymerase III subunit beta [EC:2.7.7.7]
K02339	0.000147591	0.000134757	0.000148335	0.000149526	0.000125651	0.000162687	0.000142435	0.000141123	0.000170019	0.000155025	0.00014906	0.000161728	0.000149371	0.000132625	0.000138679	0.00014855	0.00015524	DNA polymerase III subunit chi [EC:2.7.7.7]
K02340	0.0002101	0.000195589	0.000208131	0.000203946	0.000196458	0.000206539	0.000204487	0.000200494	0.000221614	0.000208625	0.000199421	0.000211575	0.000206225	0.000198714	0.000196285	0.000205445	0.000205707	DNA polymerase III subunit delta [EC:2.7.7.7]
K02341	0.000184463	0.000185973	0.000188597	0.000189161	0.00018137	0.000190148	0.000186794	0.000186488	0.000193215	0.000190395	0.000187597	0.000189757	0.000184459	0.00018197	0.000185645	0.000185246	0.00018945	DNA polymerase III subunit delta [EC:2.7.7.7]
K02342	0.000387816	0.000412899	0.000392857	0.00040985	0.000410146	0.000389592	0.000407867	0.000417706	0.000382436	0.000405669	0.000400236	0.000382588	0.000383902	0.000412686	0.000415476	0.000389127	0.000405505	DNA polymerase III subunit epsilon [EC:2.7.7.7]
K02343	0.000189771	0.000186146	0.000195816	0.000192536	0.000191038	0.000194171	0.000190823	0.000189494	0.000196515	0.000193275	0.000190508	0.000189937	0.000188454	0.000186589	0.000188227	0.000187534	0.000196265	DNA polymerase III subunit gamma/tau [EC:2.7.7.7]
K02346	0.000268124	0.000289589	0.000274929	0.000272547	0.000279473	0.000259451	0.000275855	0.000279008	0.000264033	0.000271937	0.000266668	0.00026282	0.000257224	0.000273161	0.000274099	0.00026222	0.000261672	DNA polymerase IV [EC:2.7.7.7]
K02347	1.88424e-05	2.56729e-05	1.81266e-05	2.0076e-05	3.44199e-05	1.27651e-05	2.14828e-05	2.36876e-05	1.02971e-05	1.66339e-05	1.64035e-05	1.32034e-05	2.06024e-05	3.16421e-05	2.47441e-05	1.86229e-05	1.70877e-05	DNA polymerase (family X)
K02348	0.000154983	0.000136672	0.000151597	0.000155011	0.00013132	0.000165684	0.000146665	0.000149544	0.000163095	0.000157454	0.000159453	0.000157971	0.000150896	0.000137326	0.000147959	0.000155679	0.00016642	ElaA protein
K02351	0.000121497	0.000168938	0.000141842	0.000152783	0.000160808	0.000123299	0.000157421	0.000155853	0.000119579	0.000139776	0.000144504	0.000124805	0.000128324	0.000164464	0.000168276	0.000140088	0.000129927	putative membrane protein
K02355	0.000437361	0.000423164	0.000409663	0.000403175	0.000453712	0.000391698	0.000403834	0.000408445	0.000389702	0.000402068	0.00039779	0.000401979	0.00042274	0.000428371	0.000403675	0.00041181	0.000401762	elongation factor G
K02356	0.000194551	0.000199598	0.00019737	0.000203625	0.000191573	0.000198564	0.000196293	0.000198886	0.000201606	0.000201077	0.000196851	0.000197656	0.000193018	0.000191145	0.000197888	0.000195033	0.000201051	elongation factor P
K02357	0.000233257	0.000215319	0.000228311	0.000223972	0.000212505	0.00023412	0.000221295	0.00022032	0.000244207	0.000228302	0.000221714	0.000233573	0.000228061	0.000212745	0.000214155	0.000225573	0.000228082	elongation factor Ts
K02358	0.000379822	0.000358349	0.000369057	0.000382517	0.000357318	0.000392335	0.000366834	0.000374083	0.00039417	0.000380975	0.000375344	0.000381286	0.000373724	0.000360197	0.000372064	0.000376375	0.00038115	elongation factor Tu
K02361	2.53357e-05	3.48384e-05	2.92663e-05	2.80523e-05	3.08725e-05	2.86193e-05	2.83536e-05	2.96404e-05	2.1809e-05	2.6424e-05	3.17931e-05	2.52145e-05	2.62e-05	2.49423e-05	2.91067e-05	2.62705e-05	3.07651e-05	isochorismate synthase [EC:5.4.4.2]
K02362	4.77052e-05	3.65052e-05	4.25262e-05	3.8279e-05	3.79141e-05	4.20619e-05	3.88897e-05	4.22231e-05	4.73831e-05	4.2333e-05	3.85403e-05	4.49744e-05	4.408e-05	3.78137e-05	3.47825e-05	4.19005e-05	4.83654e-05	enterobactin synthetase component D [EC:6.3.2.14 2.7.8.-]
K02363	0.000110347	0.000105171	9.84499e-05	9.72701e-05	0.000104099	9.83931e-05	0.000101285	0.000109038	9.42119e-05	0.00010116	0.000101855	0.000101362	0.000101191	9.38211e-05	9.9222e-05	0.000100311	9.97564e-05	2,3-dihydroxybenzoate-AMP ligase [EC:6.3.2.14 2.7.7.58]
K02364	0.00161773	0.00173285	0.00145672	0.00152968	0.00189257	0.00133793	0.00154541	0.0016171	0.0011877	0.00144724	0.00151184	0.00135629	0.00158232	0.00176854	0.00165848	0.00154481	0.0014592	enterobactin synthetase component F [EC:6.3.2.14]
K02371	0.000290005	0.000275834	0.000299117	0.000294612	0.000294064	0.00029778	0.000293389	0.000277418	0.000300619	0.000284578	0.000291281	0.000287188	0.000306141	0.000295924	0.000293005	0.000303036	0.000294218	enoyl-[acyl-carrier protein] reductase II [EC:1.3.1.9]
K02372	0.000375926	0.00034683	0.000344155	0.000370071	0.00035825	0.000371292	0.000346209	0.000353294	0.000372995	0.000369107	0.000365323	0.000375476	0.000365065	0.000356769	0.000357144	0.000367312	0.000354542	3-hydroxyacyl-[acyl-carrier-protein] dehydratase [EC:4.2.1.59]
K02377	0.000159081	0.00016264	0.000176603	0.000186334	0.000161211	0.000185869	0.000178898	0.000166137	0.00019409	0.000179254	0.000179871	0.000184922	0.000178871	0.000180209	0.000182447	0.000183446	0.000176883	GDP-L-fucose synthase [EC:1.1.1.271]
K02379	0.00017511	0.000166697	0.00017624	0.000177056	0.000171084	0.000176154	0.000171627	0.000174077	0.000170684	0.000173025	0.000176908	0.000169384	0.00017221	0.000169572	0.00017642	0.000176692	0.000179303	FdhD protein
K02380	5.14544e-05	4.81149e-05	5.80576e-05	7.3218e-05	4.248e-05	7.31804e-05	6.17569e-05	6.20695e-05	7.30156e-05	6.54327e-05	6.64559e-05	6.07986e-05	5.77704e-05	5.6902e-05	6.93459e-05	6.33995e-05	7.05045e-05	FdhE protein
K02381	9.02476e-07	1.50994e-06	7.81028e-07	1.51972e-06	1.64282e-06	1.06267e-06	1.34499e-06	1.40865e-06	7.45049e-07	1.12944e-06	1.13902e-06	7.47044e-07	7.00539e-07	1.07938e-06	1.6046e-06	1.27513e-06	1.20614e-06	FdrA protein
K02385	8.49382e-06	1.34246e-05	8.77384e-06	1.11846e-05	9.11714e-06	7.67395e-06	1.29576e-05	1.23486e-05	6.51337e-06	9.96744e-06	1.15126e-05	6.13085e-06	7.13769e-06	8.05805e-06	1.28918e-05	8.66015e-06	8.54783e-06	flagellar protein FlbD
K02386	0.000266719	0.000218151	0.000265649	0.000254141	0.000222227	0.000299079	0.000247293	0.000236833	0.000304042	0.000265508	0.000266845	0.000292726	0.00028276	0.000232192	0.000238774	0.000273945	0.00028004	flagella basal body P-ring formation protein FlgA
K02387	0.000281616	0.000240632	0.00028113	0.000273684	0.000237305	0.000312693	0.000267063	0.000257052	0.000317249	0.000283587	0.000284807	0.000305146	0.000295812	0.000246418	0.000258852	0.000288935	0.000295518	flagellar basal-body rod protein FlgB
K02388	0.000280343	0.000238557	0.000280417	0.000272031	0.000235929	0.000311203	0.000265241	0.000256078	0.000315436	0.000281564	0.000283213	0.000303528	0.000294323	0.000244932	0.000257534	0.000287713	0.000294237	flagellar basal-body rod protein FlgC
K02389	0.000282088	0.000241217	0.000281206	0.000274176	0.000239955	0.000313039	0.000267206	0.000257549	0.000317493	0.000283011	0.000285526	0.000306066	0.000296517	0.000247941	0.000259714	0.000289629	0.000296471	flagellar basal-body rod modification protein FlgD
K02390	0.000413943	0.000359875	0.000417665	0.000432366	0.000367575	0.000479062	0.000409507	0.000396589	0.000473666	0.000432777	0.000444688	0.000458332	0.000446894	0.000388188	0.000416592	0.00044316	0.000450148	flagellar hook protein FlgE
K02391	0.000459579	0.00037215	0.000457367	0.000455765	0.000393435	0.000509831	0.000434937	0.0004193	0.000523218	0.000461021	0.000464257	0.000500086	0.000489267	0.000414001	0.000432395	0.000481699	0.000482256	flagellar basal-body rod protein FlgF
K02392	0.000518018	0.000428122	0.000514611	0.000476855	0.000422758	0.000559994	0.000473664	0.000450998	0.000576555	0.000499395	0.000500137	0.000553182	0.000539899	0.00043171	0.000444558	0.000518053	0.000527844	flagellar basal-body rod protein FlgG
K02393	0.000337959	0.000266359	0.000324516	0.000310678	0.000269362	0.000364585	0.000299773	0.000291959	0.000377873	0.000323623	0.000320004	0.000356121	0.000344541	0.000278512	0.000286215	0.0003325	0.000337354	flagellar L-ring protein precursor FlgH
K02394	0.000272288	0.000226371	0.000271477	0.000261946	0.0002283	0.000303979	0.000253127	0.000244304	0.000309012	0.000271585	0.000272245	0.000297587	0.000287756	0.000237398	0.000245882	0.00027957	0.000286658	flagellar P-ring protein precursor FlgI
K02395	0.000333525	0.000275232	0.000326863	0.000342742	0.000287766	0.000377476	0.000314107	0.000310777	0.000372789	0.000336606	0.000346779	0.000358118	0.000356242	0.000301318	0.000323474	0.000350487	0.000361886	flagellar protein FlgJ
K02396	0.000276039	0.00023256	0.000274588	0.000268853	0.000233437	0.000302338	0.000263064	0.000253188	0.000312057	0.000278191	0.000276246	0.000297297	0.000287217	0.000243457	0.000254822	0.000282615	0.00028619	flagellar hook-associated protein 1 FlgK
K02397	0.000238219	0.000202219	0.00023386	0.000242522	0.000209263	0.000267437	0.000231327	0.000228417	0.000263897	0.000243705	0.000249125	0.000253785	0.000250413	0.000217164	0.000236691	0.00025043	0.000254658	flagellar hook-associated protein 3 FlgL
K02398	0.000219926	0.000174487	0.000215726	0.000221127	0.000185887	0.000249893	0.000206109	0.000202233	0.000247203	0.000221497	0.000227626	0.000236898	0.000233988	0.000196568	0.000209975	0.000230645	0.000236319	negative regulator of flagellin synthesis FlgM
K02399	4.81075e-05	3.81055e-05	3.84931e-05	3.38572e-05	3.97637e-05	4.82331e-05	3.20817e-05	3.68496e-05	3.53368e-05	4.06768e-05	4.72937e-05	4.69974e-05	4.6338e-05	3.33249e-05	3.38421e-05	4.25887e-05	4.9117e-05	flagella synthesis protein FlgN
K02400	0.00045438	0.000354627	0.000413553	0.000399451	0.000372871	0.000456698	0.000389368	0.00038407	0.000473548	0.000419391	0.000415438	0.000460022	0.000447112	0.000368147	0.000371654	0.000431686	0.000428156	flagellar biosynthesis protein FlhA
K02401	0.000436586	0.000342425	0.000400512	0.000384025	0.000361381	0.000439264	0.000376194	0.000368724	0.000455244	0.000404428	0.000401485	0.000445263	0.00043332	0.00035699	0.000358328	0.000418012	0.000415231	flagellar biosynthetic protein FlhB
K02402	0.000168345	0.000125425	0.000148356	0.000153106	0.00014046	0.000174423	0.00014357	0.000145661	0.000173574	0.000156812	0.000158685	0.000168992	0.000164548	0.00013944	0.000144938	0.000161235	0.000155435	flagellar transcriptional activator FlhC
K02403	0.000168481	0.000125547	0.000148494	0.000153266	0.0001406	0.000174643	0.000143746	0.000145858	0.000173725	0.000156994	0.000158835	0.00016917	0.0001647	0.000139591	0.000145108	0.000161325	0.00015562	flagellar transcriptional activator FlhD
K02404	0.000125115	9.92413e-05	0.000121476	0.000125408	0.000103231	0.000139652	0.000115864	0.000116678	0.00013898	0.000126316	0.00012737	0.000131768	0.000128551	0.00010887	0.000117917	0.000127591	0.000133991	flagellar biosynthesis protein FlhF
K02405	0.000392227	0.00033547	0.000386595	0.000391353	0.000352944	0.000425302	0.000378423	0.000367939	0.0004222	0.000389685	0.000400777	0.000409002	0.000413161	0.000363377	0.000380327	0.00040708	0.000410375	RNA polymerase sigma factor for flagellar operon FliA
K02406	0.000565088	0.000459618	0.000580621	0.000561601	0.000470388	0.0006741	0.000543776	0.000513863	0.000666406	0.000574474	0.000590727	0.000627563	0.000619917	0.000495746	0.000534349	0.000606039	0.000621957	flagellin
K02407	0.000231703	0.00019252	0.000229981	0.000234128	0.000198093	0.000265735	0.000221159	0.000217046	0.000256319	0.000234265	0.000245424	0.000248384	0.00024746	0.000205657	0.000225398	0.00024377	0.000251934	flagellar hook-associated protein 2
K02408	0.000280616	0.000238691	0.000280825	0.000272355	0.000236546	0.000311563	0.000265277	0.00025625	0.000315371	0.000281303	0.000283362	0.000303618	0.000294597	0.000245089	0.000258143	0.000287964	0.000294675	flagellar hook-basal body complex protein FliE
K02409	0.000283123	0.000242484	0.000282207	0.000276514	0.000241456	0.000313664	0.000268419	0.000259385	0.000318131	0.000284119	0.000286451	0.000306493	0.000297102	0.000248895	0.000261521	0.000290594	0.000297944	flagellar M-ring protein FliF
K02410	0.000244547	0.000214794	0.000245464	0.000248288	0.000211642	0.000274629	0.000239886	0.000231717	0.000278604	0.000253075	0.000254671	0.000267186	0.000256501	0.000222621	0.000237037	0.000254494	0.000259009	flagellar motor switch protein FliG
K02411	0.000285383	0.000245797	0.000285629	0.00027809	0.000246723	0.00031524	0.000271584	0.000265579	0.000318755	0.000286629	0.000289361	0.000308772	0.000299675	0.000253621	0.000266438	0.000293255	0.000299981	flagellar assembly protein FliH
K02412	0.000485065	0.000391188	0.00045713	0.00045658	0.000405922	0.000510569	0.000437742	0.000428872	0.000526163	0.000466993	0.000466168	0.000504279	0.000491726	0.000413006	0.00042811	0.0004802	0.000479386	flagellum-specific ATP synthase [EC:3.6.3.14]
K02413	0.000123176	9.60337e-05	0.00011833	0.00012239	0.000101003	0.000138337	0.000113448	0.000113779	0.000137267	0.000124229	0.000124888	0.000129768	0.000126518	0.000107043	0.000114946	0.000125571	0.000131237	flagellar FliJ protein
K02414	0.000200553	0.000155983	0.000186954	0.000175218	0.000164076	0.000206765	0.000172562	0.000170002	0.000211801	0.000188618	0.000186682	0.000209194	0.00020012	0.000164482	0.000162713	0.000191465	0.000194151	flagellar hook-length control protein FliK
K02415	0.000249285	0.000216034	0.000248838	0.000251243	0.00021146	0.000278725	0.000242585	0.000236346	0.000282639	0.000258821	0.000259411	0.000270993	0.000259156	0.000225017	0.000239821	0.000257661	0.00026809	flagellar FliL protein
K02416	0.000215466	0.000179932	0.0002033	0.000193671	0.00018102	0.000221337	0.00019342	0.00018935	0.000226351	0.000206928	0.000205454	0.000223799	0.000213766	0.00017925	0.000184104	0.000208123	0.000210209	flagellar motor switch protein FliM
K02417	0.000293318	0.000260334	0.000297088	0.000283942	0.00024932	0.000324665	0.000282026	0.000268503	0.000336047	0.000298456	0.000295225	0.000324076	0.000306845	0.000259649	0.000268562	0.000299881	0.000305359	flagellar motor switch protein FliN/FliY
K02418	0.000168868	0.000136409	0.00016477	0.000159601	0.000138059	0.000184928	0.000151134	0.000149509	0.00018579	0.000164813	0.00016532	0.000177784	0.000174001	0.000139656	0.000148798	0.000169539	0.000178927	flagellar protein FliO/FliZ
K02419	0.000371487	0.000302492	0.000350777	0.000341562	0.000309742	0.000387724	0.000331434	0.000324831	0.00039848	0.000354593	0.000353988	0.000385973	0.000374705	0.000311019	0.000319528	0.000363625	0.000366358	flagellar biosynthetic protein FliP
K02420	0.000283487	0.000242969	0.000282844	0.000276979	0.00024203	0.00031409	0.000268889	0.000260061	0.000318549	0.000284649	0.000286832	0.00030697	0.000297491	0.000249383	0.000262004	0.000291082	0.000298373	flagellar biosynthetic protein FliQ
K02421	0.000316158	0.000263272	0.000302997	0.000296809	0.000268868	0.000337164	0.000288971	0.000281723	0.000340205	0.000308714	0.00031133	0.000334333	0.000324257	0.000272374	0.000282108	0.000316607	0.000318858	flagellar biosynthetic protein FliR
K02422	0.000234657	0.000191864	0.0002296	0.000237145	0.00019646	0.000263103	0.000223345	0.0002207	0.000259396	0.000238543	0.000245529	0.000248419	0.00024521	0.000208521	0.000226928	0.000243689	0.000255416	flagellar protein FliS
K02423	0.000117223	9.27668e-05	0.000116574	0.000114479	9.87548e-05	0.000138413	0.000107992	0.000105929	0.000131568	0.000115843	0.000122286	0.000127748	0.000126508	0.000101293	0.000109253	0.00012266	0.000124571	flagellar protein FliT
K02424	0.000111177	8.19576e-05	9.76101e-05	7.59752e-05	9.0492e-05	9.45699e-05	8.38636e-05	8.31271e-05	9.88194e-05	8.80147e-05	8.92514e-05	0.000107155	0.00010417	8.21792e-05	7.36187e-05	9.98743e-05	9.09026e-05	cystine transport system substrate-binding protein
K02426	3.33358e-05	4.64867e-05	3.69466e-05	3.71037e-05	2.97922e-05	3.22913e-05	3.642e-05	3.73855e-05	4.04984e-05	4.16564e-05	3.30873e-05	3.89715e-05	2.88046e-05	3.2151e-05	3.20764e-05	3.01959e-05	3.77152e-05	cysteine desulfuration protein SufE
K02427	0.000152794	0.000141873	0.000153595	0.000157244	0.000133284	0.000166969	0.000148181	0.000148287	0.000174968	0.000160677	0.000154491	0.000166817	0.000154221	0.000138742	0.000145693	0.000154057	0.000161586	23S rRNA (uridine2552-2-O)-methyltransferase [EC:2.1.1.166]
K02428	0.00024164	0.000264326	0.00025013	0.000247732	0.000253198	0.00023681	0.000252749	0.000252377	0.000242734	0.000251552	0.000243456	0.000243206	0.000235349	0.000251033	0.000249238	0.000240265	0.000245572	XTP/dITP diphosphohydrolase [EC:3.6.1.66]
K02429	4.78198e-05	5.25459e-05	4.13654e-05	4.91605e-05	3.91128e-05	4.71767e-05	4.23319e-05	4.78322e-05	5.0127e-05	5.15273e-05	4.35817e-05	4.61851e-05	3.91256e-05	3.8558e-05	4.59517e-05	4.44692e-05	4.9995e-05	MFS transporter, FHS family, L-fucose permease
K02430	4.4693e-06	5.80272e-06	3.95138e-06	5.15118e-06	7.67083e-06	3.26663e-06	5.61813e-06	8.3138e-06	2.49034e-06	4.68937e-06	4.53341e-06	3.34116e-06	3.83053e-06	6.90804e-06	7.45539e-06	4.41983e-06	4.28334e-06	DeoR family transcriptional regulator, L-fucose operon activator
K02431	4.9262e-05	4.62581e-05	5.31489e-05	3.94532e-05	3.88939e-05	4.50043e-05	5.02259e-05	4.34446e-05	5.73717e-05	4.77083e-05	4.12857e-05	5.28129e-05	4.67177e-05	3.93124e-05	3.49802e-05	4.25734e-05	4.27507e-05	L-fucose mutarotase [EC:5.1.3.29]
K02433	0.000986563	0.000975952	0.00108034	0.00109499	0.000977969	0.00110354	0.00108452	0.00102656	0.0011559	0.0010728	0.00105648	0.00108015	0.00107727	0.00107824	0.00107931	0.00108319	0.00108822	aspartyl-tRNA(Asn)/glutamyl-tRNA(Gln) amidotransferase subunit A [EC:6.3.5.6 6.3.5.7]
K02434	0.000178231	0.000176482	0.000181165	0.000178484	0.000177158	0.000184205	0.000181144	0.000180791	0.000186219	0.000182984	0.000180721	0.000183551	0.000178677	0.000178712	0.00017915	0.000179211	0.000180498	aspartyl-tRNA(Asn)/glutamyl-tRNA(Gln) amidotransferase subunit B [EC:6.3.5.6 6.3.5.7]
K02435	0.00017407	0.00017103	0.000177477	0.00017383	0.000169852	0.000181186	0.000175928	0.000172808	0.000184004	0.000178665	0.000176624	0.000180457	0.000174982	0.000172129	0.000172206	0.000175047	0.00017662	aspartyl-tRNA(Asn)/glutamyl-tRNA(Gln) amidotransferase subunit C [EC:6.3.5.6 6.3.5.7]
K02437	0.000234261	0.00024381	0.000248793	0.000262409	0.000223113	0.000259016	0.000253608	0.000252042	0.000259491	0.000258761	0.000258739	0.000249691	0.00023932	0.000241757	0.00025914	0.000250994	0.000264614	glycine cleavage system H protein
K02438	0.0002023	0.000195611	0.000169997	0.000173712	0.000213783	0.000161098	0.000183762	0.000196684	0.000159303	0.000183568	0.00017977	0.000180436	0.000173397	0.000190505	0.000181764	0.000175271	0.000158117	glycogen debranching enzyme [EC:3.2.1.196]
K02439	6.4798e-06	4.53901e-06	5.37789e-06	5.35546e-06	1.5168e-06	6.07954e-06	4.73843e-06	6.56536e-06	6.23131e-06	7.91508e-06	6.78836e-06	5.80809e-06	4.13707e-06	4.18224e-06	4.19452e-06	4.72159e-06	1.07113e-05	thiosulfate sulfurtransferase [EC:2.8.1.1]
K02440	0.000134676	0.000154927	0.000125403	0.000126293	0.000175412	0.000102249	0.00013061	0.000143446	8.38776e-05	0.00011853	0.000124346	0.000103833	0.000124988	0.000157147	0.000142862	0.00012529	0.000122937	glycerol uptake facilitator protein
K02441	6.47166e-06	5.12112e-06	6.33989e-06	5.98937e-06	2.01542e-06	6.15968e-06	5.68768e-06	7.52683e-06	6.13697e-06	7.98366e-06	7.53709e-06	6.1856e-06	4.47747e-06	4.32811e-06	4.96989e-06	4.60443e-06	1.13818e-05	GlpG protein
K02442	1.59469e-07	1.48657e-07	1.24576e-07	2.03732e-07	7.83849e-08	2.1617e-07	1.97449e-07	1.6982e-07	1.54282e-07	1.39232e-07	1.32484e-07	1.79266e-07	1.26903e-07	1.5043e-07	1.57185e-07	2.09798e-07	1.58864e-07	membrane protein GlpM
K02443	1.19835e-05	1.59243e-05	1.12366e-05	1.15311e-05	2.23504e-05	6.45635e-06	1.21133e-05	1.10768e-05	4.6889e-06	8.66233e-06	8.86004e-06	5.95162e-06	1.3752e-05	2.05771e-05	1.40878e-05	1.15985e-05	9.7986e-06	glycerol uptake operon antiterminator
K02444	0.000268425	0.000247539	0.000262451	0.000241371	0.000234334	0.000262541	0.000253802	0.000242927	0.000291372	0.000263042	0.000245745	0.000282141	0.000259817	0.0002405	0.000225178	0.000247729	0.000243988	DeoR family transcriptional regulator, glycerol-3-phosphate regulon repressor
K02445	2.36327e-06	3.36546e-06	2.1051e-06	2.99489e-06	4.39925e-06	2.62897e-06	2.74652e-06	3.08194e-06	3.03983e-06	2.92632e-06	2.9641e-06	3.31355e-06	2.67621e-06	3.64897e-06	2.85967e-06	2.67944e-06	2.84717e-06	MFS transporter, OPA family, glycerol-3-phosphate transporter
K02446	5.08641e-05	7.47922e-05	5.83265e-05	5.2792e-05	6.77499e-05	4.21077e-05	6.22388e-05	5.93847e-05	4.53819e-05	5.44619e-05	5.0727e-05	4.86806e-05	4.75848e-05	6.37468e-05	5.81063e-05	4.92506e-05	4.53617e-05	fructose-1,6-bisphosphatase II [EC:3.1.3.11]
K02448	6.65262e-05	4.20796e-05	5.24699e-05	4.50157e-05	5.36314e-05	5.25154e-05	4.66965e-05	4.69129e-05	5.82221e-05	5.17291e-05	4.94828e-05	6.06282e-05	5.9791e-05	4.71467e-05	4.1128e-05	5.58196e-05	5.07677e-05	nitric oxide reductase NorD protein
K02450	0.000221103	0.00018037	0.000221236	0.000221223	0.000194483	0.000257825	0.000210261	0.000205669	0.000249092	0.000223078	0.000232469	0.000242237	0.000240359	0.000200686	0.000213289	0.000234133	0.000236914	general secretion pathway protein A
K02451	9.7578e-05	7.77135e-05	9.95786e-05	9.90111e-05	8.5995e-05	0.000114075	9.43224e-05	9.03316e-05	0.000112186	9.9873e-05	0.00010342	0.000108779	0.000107769	9.03606e-05	9.51407e-05	0.000105738	0.000106237	general secretion pathway protein B
K02452	0.000107146	9.11478e-05	0.000108158	0.000109607	9.99325e-05	0.000126002	0.000105482	0.000100689	0.000125432	0.000112713	0.000114825	0.000122274	0.000118417	0.000102579	0.000106757	0.00011708	0.000116842	general secretion pathway protein C
K02453	0.000420502	0.000337049	0.000400611	0.000392438	0.000367684	0.000458997	0.000373297	0.000366063	0.000440989	0.000403747	0.000424696	0.000449735	0.00044684	0.000364411	0.000377619	0.000432183	0.000437198	general secretion pathway protein D
K02454	0.000579863	0.000475331	0.000575742	0.000553811	0.000499385	0.000661999	0.00052357	0.000516953	0.000627447	0.000564663	0.000598199	0.000628165	0.000626931	0.00049275	0.000526856	0.000600142	0.000624308	general secretion pathway protein E
K02455	0.000254155	0.00021715	0.000263167	0.000249451	0.000226906	0.000302798	0.000237113	0.000229309	0.000282999	0.000252053	0.000272484	0.000286013	0.000287258	0.000223011	0.000239512	0.000274477	0.000286822	general secretion pathway protein F
K02456	0.00066174	0.000554914	0.00067618	0.000642509	0.000576195	0.00077266	0.000610657	0.000593689	0.000737949	0.000656122	0.000699097	0.000737612	0.000737414	0.000579593	0.000609176	0.000700653	0.000742754	general secretion pathway protein G
K02457	0.000374166	0.000298224	0.000362914	0.000362647	0.000329656	0.00040921	0.000345103	0.00033392	0.000409883	0.000368891	0.000376223	0.000402831	0.000398929	0.000334738	0.000346244	0.000389442	0.000386753	general secretion pathway protein H
K02458	0.00015322	0.0001307	0.000143811	0.000150858	0.000140636	0.000160126	0.000139734	0.000141109	0.000158199	0.000152544	0.000153193	0.000160445	0.000156981	0.000137142	0.000145132	0.000155362	0.000154292	general secretion pathway protein I
K02459	0.000280211	0.000233085	0.000253664	0.000239131	0.000252134	0.000294284	0.00022664	0.000233958	0.000261214	0.000252726	0.000273936	0.000290039	0.000289396	0.000225307	0.000231851	0.00027415	0.000278308	general secretion pathway protein J
K02460	0.000117065	0.000105617	0.00011917	0.000125714	0.00011009	0.000133887	0.000116054	0.000115183	0.00013308	0.000124034	0.000124575	0.000129384	0.00012672	0.000110623	0.000120587	0.000126516	0.00012943	general secretion pathway protein K
K02461	0.000115054	0.000102622	0.000117024	0.000121773	0.000106677	0.000132121	0.000113346	0.000111347	0.000131543	0.000121656	0.000122571	0.000128086	0.000125212	0.000108735	0.000116996	0.00012442	0.000126646	general secretion pathway protein L
K02462	0.000112425	9.8347e-05	0.000113526	0.000118229	0.000101816	0.000129213	0.000109787	0.000107567	0.00012794	0.000118046	0.000118571	0.000123886	0.000121981	0.000104581	0.000113396	0.000121284	0.000123214	general secretion pathway protein M
K02463	0.000108265	9.25582e-05	0.000110021	0.000114281	9.74628e-05	0.000123324	0.000105189	0.000103717	0.000121796	0.000112294	0.000114041	0.000118185	0.000117538	0.000100568	0.000108621	0.000116197	0.000118745	general secretion pathway protein N
K02464	6.34158e-05	5.63314e-05	6.36733e-05	7.7266e-05	6.20163e-05	7.77031e-05	6.85734e-05	6.69955e-05	7.52431e-05	7.17875e-05	7.55824e-05	7.2627e-05	7.14378e-05	6.93015e-05	7.64959e-05	7.41524e-05	7.20465e-05	general secretion pathway protein O [EC:3.4.23.43 2.1.1.-]
K02466	3.21509e-08	5.23619e-08	8.61428e-08	6.28394e-08	6.25991e-08	6.22921e-08	4.83444e-08	5.09459e-08	8.87954e-08	6.75378e-08	8.38777e-08	7.06568e-08	9.78925e-08	8.38434e-08	4.54819e-08	4.2005e-08	7.09214e-08	glucitol operon activator protein
K02467	2.57035e-05	1.86951e-05	1.9576e-05	2.23816e-05	1.62466e-05	2.51066e-05	1.93568e-05	2.34641e-05	2.65194e-05	2.45076e-05	2.27019e-05	2.29801e-05	1.97461e-05	1.80374e-05	1.91959e-05	2.01186e-05	2.53675e-05	arabinose 5-phosphate isomerase [EC:5.3.1.13]
K02468	6.3942e-06	4.46529e-06	5.23947e-06	5.43076e-06	1.63483e-06	5.88651e-06	4.5222e-06	6.4791e-06	5.96984e-06	7.67295e-06	6.74794e-06	5.58286e-06	4.11688e-06	4.07958e-06	4.30897e-06	4.59955e-06	1.08582e-05	DeoR family transcriptional regulator, glucitol operon repressor
K02469	0.000366211	0.000368558	0.000371704	0.000374743	0.000358714	0.000376484	0.000368831	0.000368791	0.000381947	0.000376044	0.000371241	0.000375296	0.000366126	0.000361063	0.000368064	0.000368059	0.000374475	DNA gyrase subunit A [EC:5.99.1.3]
K02470	0.0004328	0.000433649	0.000424759	0.000430877	0.000447129	0.000423897	0.000425697	0.000426081	0.000425762	0.000430616	0.000424937	0.000427739	0.000430339	0.000439203	0.000428313	0.000427208	0.000426998	DNA gyrase subunit B [EC:5.99.1.3]
K02471	0.000104456	0.000114905	0.000117416	0.000125526	8.98185e-05	0.000130991	0.00012032	0.0001214	0.000131222	0.000124809	0.000123446	0.000120659	0.000107238	0.000104749	0.000121034	0.000112514	0.000120303	vitamin B12/bleomycin/antimicrobial peptide transport system ATP-binding/permease protein
K02472	2.39305e-05	3.42807e-05	2.32558e-05	3.08297e-05	3.13159e-05	2.11737e-05	3.03266e-05	3.71797e-05	1.89196e-05	2.6785e-05	2.63586e-05	1.97558e-05	2.05411e-05	2.83088e-05	3.40942e-05	2.28183e-05	2.51716e-05	UDP-N-acetyl-D-mannosaminuronic acid dehydrogenase [EC:1.1.1.336]
K02473	7.52259e-05	5.55479e-05	6.66931e-05	5.09683e-05	6.16405e-05	7.67176e-05	5.2775e-05	5.29636e-05	6.41346e-05	5.87799e-05	6.789e-05	7.58153e-05	7.80009e-05	4.96846e-05	4.84909e-05	6.87038e-05	7.16557e-05	UDP-N-acetylglucosamine 4-epimerase [EC:5.1.3.7]
K02474	0.000116165	0.000117095	0.000126878	0.000130382	0.000120139	0.000142465	0.000121187	0.000124488	0.000126973	0.000119438	0.000130013	0.000124152	0.000134742	0.000120692	0.000131229	0.000129363	0.00013848	UDP-N-acetyl-D-galactosamine dehydrogenase [EC:1.1.1.-]
K02475	3.84302e-05	5.2942e-05	3.72982e-05	3.97194e-05	6.60892e-05	2.39856e-05	4.28999e-05	4.67444e-05	1.77346e-05	3.25803e-05	3.32679e-05	2.48916e-05	3.93e-05	6.09981e-05	5.01118e-05	3.84231e-05	3.2607e-05	two-component system, CitB family, response regulator
K02476	0.000129852	0.00017611	0.000127011	0.000133621	0.000222882	8.16456e-05	0.000144012	0.000150001	6.12722e-05	0.000109481	0.000113022	7.938e-05	0.000134661	0.00020258	0.000166006	0.000128494	0.000111664	two-component system, CitB family, sensor kinase [EC:2.7.13.3]
K02477	0.000632125	0.000590433	0.000627004	0.000648382	0.000562195	0.000713359	0.000597963	0.000619336	0.000661404	0.000636413	0.000668286	0.000653408	0.000640924	0.000560861	0.000623263	0.000641474	0.000675375	two-component system, LytTR family, response regulator
K02478	0.000212576	0.000232814	0.000220591	0.000222894	0.000207315	0.000252619	0.000205211	0.00021935	0.000202096	0.000210668	0.000244677	0.000217711	0.000226522	0.000191429	0.000223422	0.000220629	0.000237721	two-component system, LytTR family, sensor kinase [EC:2.7.13.3]
K02479	0.000338258	0.000436743	0.000338909	0.000345415	0.000443942	0.000261448	0.000363342	0.000375457	0.000218845	0.000306756	0.00032803	0.000255162	0.000318225	0.000412707	0.000390704	0.0003267	0.000301597	two-component system, NarL family, response regulator
K02480	0.000604174	0.000632228	0.000580262	0.000582965	0.000691423	0.00054034	0.000595579	0.000617168	0.000497237	0.000558632	0.000586165	0.00054382	0.000602435	0.000656025	0.00063277	0.000599768	0.000559725	two-component system, NarL family, sensor kinase [EC:2.7.13.3]
K02481	0.00158648	0.0013342	0.00146429	0.00141185	0.00141022	0.00160448	0.00139037	0.00139507	0.00169657	0.00152867	0.00149247	0.00169159	0.00156083	0.00138416	0.00130866	0.00151572	0.00156266	two-component system, NtrC family, response regulator
K02482	0.000789981	0.000640641	0.000745066	0.000686669	0.000662626	0.000841689	0.000683321	0.000682627	0.000828773	0.00073752	0.000753076	0.000824125	0.000798063	0.000640648	0.000649002	0.000766078	0.000793651	two-component system, NtrC family, sensor kinase [EC:2.7.13.3]
K02483	0.00494361	0.0044882	0.00475893	0.00470386	0.00454	0.00494271	0.00465358	0.00464063	0.00500378	0.00474652	0.00475785	0.00490967	0.00487884	0.00453551	0.00458914	0.00483299	0.00477036	two-component system, OmpR family, response regulator
K02484	0.00222421	0.00196564	0.00203499	0.00196289	0.00206541	0.00213804	0.00196042	0.0019874	0.00207722	0.00203566	0.00208984	0.002157	0.00214579	0.00194507	0.0019331	0.00210462	0.00207941	two-component system, OmpR family, sensor kinase [EC:2.7.13.3]
K02485	0.000255344	0.000250304	0.000268991	0.000304843	0.000242346	0.00031216	0.000279852	0.000273432	0.00030122	0.000287205	0.000300881	0.000287666	0.00028202	0.000260276	0.000298781	0.000290387	0.000294982	two-component system, response regulator
K02486	4.83325e-06	7.48111e-06	8.09271e-06	4.84183e-06	4.84408e-06	9.17192e-06	4.18866e-06	4.88797e-06	3.6432e-06	4.37628e-06	8.66206e-06	6.9495e-06	7.82383e-06	2.6138e-06	5.38869e-06	6.34729e-06	9.65571e-06	two-component system, sensor kinase [EC:2.7.13.3]
K02487	0.00025088	0.000198734	0.000221699	0.000224901	0.00021332	0.000240943	0.000214572	0.000219756	0.000244397	0.000233407	0.000230638	0.000244548	0.00023839	0.000205255	0.000212745	0.000235676	0.000235311	type IV pili sensor histidine kinase and response regulator
K02488	0.00222157	0.00180796	0.00200166	0.00170744	0.00181331	0.00206012	0.00175005	0.0017747	0.00211804	0.00191048	0.00188654	0.00218601	0.00210067	0.00167036	0.00156392	0.00193788	0.00196924	two-component system, cell cycle response regulator [EC:2.7.7.65]
K02489	6.47433e-05	3.9518e-05	4.91129e-05	4.19079e-05	5.13105e-05	5.10388e-05	4.41882e-05	4.31767e-05	5.62952e-05	4.91487e-05	4.71853e-05	5.8767e-05	5.83379e-05	4.54708e-05	3.83169e-05	5.39338e-05	4.84265e-05	two-component system, glycerol uptake and utilization sensor kinase [EC:2.7.13.3]
K02490	9.90353e-05	6.26751e-05	9.40642e-05	6.31047e-05	7.24253e-05	9.5606e-05	7.23558e-05	6.62192e-05	0.000102177	7.54227e-05	7.59201e-05	9.94926e-05	0.000103561	6.57296e-05	5.61849e-05	9.07069e-05	9.24363e-05	two-component system, response regulator, stage 0 sporulation protein F
K02491	2.86883e-06	4.21807e-06	2.8352e-06	3.77301e-06	5.18647e-06	3.38212e-06	3.53729e-06	3.79532e-06	3.77353e-06	4.19306e-06	3.70682e-06	4.23396e-06	3.46682e-06	4.44158e-06	3.75007e-06	3.44622e-06	3.40423e-06	two-component system, sporulation sensor kinase A [EC:2.7.13.3]
K02492	0.000153634	0.000151889	0.00015788	0.000161744	0.00015764	0.000159462	0.00015679	0.000157554	0.000153402	0.000157715	0.000161596	0.000154494	0.000158418	0.00015643	0.000162737	0.000160433	0.00016634	glutamyl-tRNA reductase [EC:1.2.1.70]
K02493	0.000342867	0.000365876	0.000345877	0.000333804	0.000383933	0.000317163	0.000346942	0.000347601	0.000298787	0.000328973	0.000339357	0.000317984	0.000340653	0.000357024	0.000350144	0.000337873	0.000336324	release factor glutamine methyltransferase [EC:2.1.1.297]
K02494	0.000114036	9.61646e-05	0.000114539	0.000119134	9.83361e-05	0.000128477	0.000108999	0.000109353	0.000126685	0.000118517	0.000120133	0.000122868	0.000120563	0.000103923	0.00011225	0.000120177	0.000129058	outer membrane lipoprotein LolB
K02495	0.000347924	0.000306065	0.000315231	0.000312635	0.000319039	0.000328808	0.000306813	0.000313234	0.000330775	0.00032443	0.000317362	0.000331251	0.000328674	0.000307089	0.000302495	0.000322005	0.000322713	oxygen-independent coproporphyrinogen III oxidase [EC:1.3.98.3]
K02496	0.000127988	0.000103167	0.000123609	0.000128061	0.000105144	0.000143356	0.000117895	0.000119139	0.000142256	0.000129643	0.000130375	0.000135118	0.000131388	0.000111616	0.000119778	0.000130098	0.000136967	uroporphyrin-III C-methyltransferase [EC:2.1.1.107]
K02498	0.000142264	0.000125422	0.000142678	0.000144424	0.00011926	0.000156131	0.000136698	0.000136862	0.000162021	0.000147385	0.00014334	0.000154024	0.000144164	0.00012694	0.000132899	0.000141962	0.000149979	HemY protein
K02499	4.78197e-05	6.76996e-05	5.38528e-05	4.9881e-05	6.77378e-05	3.86993e-05	5.48142e-05	5.391e-05	4.35574e-05	5.07138e-05	4.52675e-05	4.7014e-05	4.57427e-05	6.18307e-05	5.3688e-05	4.71248e-05	4.40335e-05	tetrapyrrole methylase family protein / MazG family protein
K02500	0.000246563	0.00026705	0.000269465	0.000273957	0.000256896	0.0002685	0.000269697	0.000260867	0.000275005	0.000269008	0.000265285	0.000265179	0.000258743	0.000268369	0.000270438	0.000262571	0.000265226	cyclase [EC:4.1.3.-]
K02501	0.00022552	0.000239517	0.00024606	0.000255305	0.00022479	0.000255131	0.000248575	0.000242239	0.000264193	0.000251934	0.000247372	0.000251395	0.00023857	0.000239871	0.000247821	0.000241702	0.000247862	glutamine amidotransferase [EC:2.4.2.-]
K02502	0.000135564	0.000117059	0.000136461	0.000133594	0.000113963	0.000151417	0.000130039	0.000127416	0.000158422	0.000140862	0.000137552	0.000150455	0.000138965	0.000122342	0.000123491	0.000135677	0.000141327	ATP phosphoribosyltransferase regulatory subunit
K02503	0.000251137	0.000277233	0.000261423	0.000259288	0.000276382	0.000240425	0.000260763	0.000265015	0.000242296	0.000255061	0.000249644	0.000246292	0.000249099	0.000271421	0.000262259	0.000248392	0.00024884	histidine triad (HIT) family protein
K02504	2.71026e-05	3.47961e-05	2.86912e-05	3.51265e-05	2.63841e-05	2.57935e-05	2.70679e-05	3.4532e-05	2.64035e-05	3.34483e-05	3.03403e-05	2.7099e-05	2.45372e-05	2.58532e-05	3.10648e-05	2.57128e-05	3.64089e-05	protein transport protein HofB
K02505	7.63809e-06	6.86081e-06	6.56783e-06	7.08763e-06	3.38117e-06	5.61992e-06	5.67716e-06	8.10167e-06	5.93015e-06	8.1596e-06	6.70204e-06	5.98756e-06	4.23196e-06	5.33195e-06	6.26012e-06	6.44311e-06	1.19876e-05	protein transport protein HofC
K02507	2.01046e-06	3.79557e-06	2.84002e-06	2.11484e-06	2.90841e-06	2.63849e-06	2.87522e-06	2.12521e-06	3.15662e-06	3.20399e-06	2.84556e-06	3.48703e-06	2.30097e-06	2.30382e-06	2.85379e-06	2.72683e-06	2.56111e-06	protein transport protein HofQ
K02508	6.36331e-07	1.10297e-06	6.71472e-07	9.1825e-07	9.68707e-07	6.61845e-07	9.19257e-07	1.14883e-06	6.83392e-07	8.11493e-07	6.66548e-07	6.13503e-07	6.30228e-07	6.9647e-07	1.00249e-06	7.46281e-07	7.74084e-07	AraC family transcriptional regulator, 4-hydroxyphenylacetate 3-monooxygenase operon regulatory protein
K02509	4.09569e-05	4.66211e-05	5.9224e-05	6.36184e-05	4.49747e-05	6.26467e-05	5.93859e-05	5.52064e-05	6.27248e-05	5.88164e-05	6.11054e-05	5.46104e-05	5.22072e-05	5.49216e-05	6.4114e-05	5.73848e-05	5.97522e-05	2-oxo-hept-3-ene-1,7-dioate hydratase [EC:4.2.1.-]
K02510	0.000168638	0.000149872	0.000201326	0.000218771	0.00014907	0.000235014	0.000203639	0.000186225	0.00024627	0.000206642	0.000205938	0.000209129	0.000204388	0.000184216	0.000208158	0.000209248	0.000215733	4-hydroxy-2-oxoheptanedioate aldolase [EC:4.1.2.52]
K02511	1.10728e-05	1.2949e-05	1.08904e-05	9.58081e-06	6.6956e-06	8.51044e-06	9.70217e-06	1.15569e-05	8.28389e-06	1.21422e-05	1.12075e-05	1.10053e-05	6.30162e-06	9.61643e-06	9.63841e-06	1.07584e-05	1.35024e-05	MFS transporter, ACS family, 4-hydroxyphenylacetate permease
K02517	0.000252749	0.000215237	0.000249057	0.00026041	0.000215463	0.000282373	0.00023863	0.000241318	0.000280501	0.000261055	0.000260947	0.000269428	0.000261538	0.00022602	0.000245243	0.000262516	0.000277855	Kdo2-lipid IVA lauroyltransferase [EC:2.3.1.241]
K02518	0.000319506	0.000289081	0.000310143	0.000315544	0.00030432	0.000325713	0.000308408	0.000309439	0.000331285	0.000320683	0.000316755	0.000327715	0.000319884	0.000305689	0.000309834	0.000320219	0.000316778	translation initiation factor IF-1
K02519	0.000209459	0.00020893	0.00020852	0.00021197	0.000199191	0.000213175	0.000206542	0.000209244	0.000216724	0.000212444	0.000208786	0.000211561	0.000203512	0.000200041	0.00020627	0.000206693	0.000207961	translation initiation factor IF-2
K02520	0.00018427	0.000185248	0.000187363	0.000188678	0.000180645	0.000189817	0.000186061	0.000185811	0.000192734	0.000189858	0.000186663	0.000188989	0.000183919	0.000181579	0.000185006	0.000184983	0.000188775	translation initiation factor IF-3
K02521	7.1907e-05	8.65196e-05	8.24185e-05	9.6636e-05	8.05774e-05	8.41404e-05	9.22115e-05	9.60692e-05	7.79255e-05	8.83123e-05	9.14669e-05	7.47143e-05	7.89034e-05	9.52262e-05	0.000103775	8.64834e-05	9.55377e-05	LysR family transcriptional regulator, positive regulator for ilvC
K02523	0.000176029	0.000175641	0.000178624	0.000180996	0.000171468	0.00018354	0.000174826	0.000177739	0.000189103	0.000183479	0.00017673	0.000187004	0.000177795	0.000176502	0.000175223	0.000178013	0.000181173	octaprenyl-diphosphate synthase [EC:2.5.1.90]
K02525	3.42094e-05	2.2773e-05	3.17132e-05	2.40151e-05	2.37858e-05	2.96672e-05	2.82166e-05	2.44581e-05	3.53624e-05	2.75745e-05	2.58134e-05	3.17739e-05	3.2723e-05	2.29841e-05	2.12736e-05	3.01634e-05	2.90471e-05	LacI family transcriptional regulator, kdg operon repressor
K02526	4.71976e-07	8.63758e-07	5.27312e-07	8.41313e-07	8.81467e-07	5.3762e-07	7.56887e-07	1.01609e-06	4.51993e-07	7.51921e-07	5.24869e-07	4.32016e-07	4.35872e-07	5.73391e-07	8.76405e-07	5.54163e-07	6.52372e-07	2-keto-3-deoxygluconate permease
K02527	0.000159287	0.000134267	0.000151587	0.000159586	0.000131163	0.000174699	0.000148861	0.000150967	0.000175579	0.000161967	0.000158941	0.00016383	0.000156707	0.00013572	0.000150026	0.000158294	0.000164521	3-deoxy-D-manno-octulosonic-acid transferase [EC:2.4.99.12 2.4.99.13 2.4.99.14 2.4.99.15]
K02528	0.000195118	0.000200413	0.000196588	0.000201261	0.00020244	0.000190353	0.000199497	0.000198297	0.000197303	0.000199427	0.0001917	0.000193148	0.000193578	0.000204643	0.000199464	0.000193876	0.000193927	16S rRNA (adenine1518-N6/adenine1519-N6)-dimethyltransferase [EC:2.1.1.182]
K02529	0.00221248	0.00269729	0.00226259	0.0020971	0.00242772	0.00186137	0.00234484	0.00232527	0.00191502	0.00214758	0.00211098	0.00208002	0.00207127	0.002352	0.00222721	0.00208274	0.00192168	LacI family transcriptional regulator
K02530	3.59352e-05	5.33264e-05	3.71692e-05	4.02314e-05	4.88577e-05	2.63231e-05	4.62699e-05	4.69466e-05	2.14204e-05	3.54845e-05	3.91105e-05	2.56157e-05	3.38163e-05	4.62619e-05	4.89576e-05	3.59197e-05	3.16491e-05	DeoR family transcriptional regulator, lactose phosphotransferase system repressor
K02532	1.22817e-07	7.96922e-08	1.32748e-07	1.11788e-07	1.46155e-07	5.25274e-08	1.26713e-07	9.38253e-08	1.9424e-08	6.59792e-08	5.67787e-08	1.69576e-08	2.74385e-08	2.97929e-08	6.44023e-08	4.76813e-08	6.38293e-08	MFS transporter, OHS family, lactose permease
K02533	0.000142232	0.000131149	0.000144366	0.000145645	0.000124942	0.000158721	0.000139272	0.000136417	0.000165894	0.000149189	0.000144413	0.000157567	0.000147085	0.000129366	0.00013554	0.000144487	0.000146004	tRNA/rRNA methyltransferase [EC:2.1.1.-]
K02535	0.000145551	0.000131079	0.000145907	0.000146991	0.000123648	0.000160514	0.000140181	0.000138911	0.000167131	0.0001523	0.000146804	0.000159388	0.000147617	0.000130658	0.000136954	0.000146998	0.000153377	UDP-3-O-[3-hydroxymyristoyl] N-acetylglucosamine deacetylase [EC:3.5.1.108]
K02536	0.000188592	0.000184471	0.000190289	0.00019326	0.000163702	0.000202501	0.000186832	0.000186002	0.000217134	0.000199905	0.000188409	0.000206225	0.000185464	0.000170374	0.000178628	0.000185059	0.000191651	UDP-3-O-[3-hydroxymyristoyl] glucosamine N-acyltransferase [EC:2.3.1.191]
K02538	2.71598e-05	3.12547e-05	3.99084e-05	5.20416e-05	2.88881e-05	5.10808e-05	4.42346e-05	4.02659e-05	4.95989e-05	4.34756e-05	4.70059e-05	4.11489e-05	4.11389e-05	4.14795e-05	5.14673e-05	4.47578e-05	4.70672e-05	activator of the mannose operon, transcriptional antiterminator
K02548	2.81091e-05	4.11682e-05	3.22319e-05	3.21316e-05	3.68626e-05	2.53046e-05	3.64641e-05	3.5721e-05	2.42312e-05	3.11978e-05	3.53755e-05	2.72595e-05	2.53314e-05	3.17602e-05	3.55044e-05	2.91115e-05	2.80799e-05	1,4-dihydroxy-2-naphthoate octaprenyltransferase [EC:2.5.1.74 2.5.1.-]
K02549	4.1791e-05	6.07449e-05	4.64886e-05	4.37828e-05	5.56836e-05	3.03472e-05	4.87883e-05	4.70374e-05	2.56109e-05	3.98328e-05	4.42803e-05	3.37603e-05	3.63766e-05	5.09923e-05	5.04993e-05	4.36644e-05	3.57974e-05	O-succinylbenzoate synthase [EC:4.2.1.113]
K02550	2.84717e-05	1.43885e-05	2.55251e-05	1.67003e-05	1.81491e-05	2.44557e-05	1.98864e-05	1.64316e-05	3.06485e-05	2.07575e-05	1.85591e-05	2.73778e-05	2.80396e-05	1.76444e-05	1.33149e-05	2.45809e-05	2.35045e-05	glycolate permease
K02551	1.99119e-05	2.82953e-05	2.33649e-05	2.16868e-05	2.44442e-05	1.69468e-05	2.48842e-05	2.41628e-05	1.5414e-05	2.10475e-05	2.38436e-05	1.77451e-05	1.66814e-05	2.11592e-05	2.40915e-05	2.0268e-05	1.89475e-05	2-succinyl-5-enolpyruvyl-6-hydroxy-3-cyclohexene-1-carboxylate synthase [EC:2.2.1.9]
K02552	2.99463e-05	4.25305e-05	3.52574e-05	3.28901e-05	3.61066e-05	3.13142e-05	3.3761e-05	3.51426e-05	2.43836e-05	3.10177e-05	3.73833e-05	2.9951e-05	2.95007e-05	2.97831e-05	3.49319e-05	3.18896e-05	3.42679e-05	menaquinone-specific isochorismate synthase [EC:5.4.4.2]
K02553	0.000155804	0.000135089	0.000163926	0.000180278	0.000136303	0.000195162	0.000162581	0.000159851	0.000193155	0.000173206	0.000178338	0.000177749	0.000173373	0.000154773	0.000171439	0.000175566	0.00018471	regulator of ribonuclease activity A
K02554	8.90119e-05	7.42122e-05	7.97061e-05	6.70221e-05	8.09901e-05	7.30972e-05	7.19566e-05	7.14471e-05	7.82683e-05	7.66335e-05	7.42148e-05	8.42753e-05	7.86409e-05	7.03548e-05	6.64796e-05	8.05234e-05	7.20511e-05	2-keto-4-pentenoate hydratase [EC:4.2.1.80]
K02556	0.000255704	0.00022583	0.000257706	0.000258174	0.000218165	0.000289624	0.000248403	0.000243263	0.000287981	0.00026578	0.000269187	0.000279233	0.000268551	0.000229229	0.00024712	0.000265753	0.000279047	chemotaxis protein MotA
K02557	0.000720124	0.000647718	0.000719653	0.000717123	0.000646687	0.000801318	0.000691017	0.00068088	0.000806742	0.000738673	0.000742255	0.000788728	0.000756333	0.000664871	0.000684305	0.000742482	0.000775552	chemotaxis protein MotB
K02558	0.000125496	0.000109811	0.000128076	0.000130669	0.000115678	0.000139973	0.000121487	0.000121414	0.000138255	0.000131319	0.00013188	0.000134333	0.00013151	0.00011688	0.00012448	0.000131709	0.000141677	UDP-N-acetylmuramate: L-alanyl-gamma-D-glutamyl-meso-diaminopimelate ligase [EC:6.3.2.45]
K02560	5.18694e-06	7.07269e-06	4.80877e-06	6.52291e-06	4.606e-06	4.86062e-06	4.44269e-06	5.80613e-06	4.68224e-06	5.39339e-06	4.93256e-06	4.73046e-06	4.50498e-06	4.73054e-06	5.43262e-06	4.86981e-06	5.68205e-06	lauroyl-Kdo2-lipid IVA myristoyltransferase [EC:2.3.1.243]
K02563	0.00020476	0.000214707	0.000208536	0.000209871	0.000213137	0.000203161	0.000207536	0.000207191	0.000204592	0.000207749	0.000205408	0.000205089	0.000205014	0.000212283	0.000209211	0.000206303	0.000206428	UDP-N-acetylglucosamine--N-acetylmuramyl-(pentapeptide) pyrophosphoryl-undecaprenol N-acetylglucosamine transferase [EC:2.4.1.227]
K02564	2.27784e-05	2.80188e-05	2.34138e-05	2.26943e-05	3.95799e-05	1.49801e-05	2.49118e-05	2.60991e-05	1.14442e-05	1.87727e-05	1.9386e-05	1.33875e-05	2.25941e-05	3.36931e-05	2.76516e-05	2.14889e-05	2.08065e-05	glucosamine-6-phosphate deaminase [EC:3.5.99.6]
K02566	5.2971e-05	7.42214e-05	5.21859e-05	5.4878e-05	8.7556e-05	3.33932e-05	5.99031e-05	5.8988e-05	2.5511e-05	4.48983e-05	4.74822e-05	3.24765e-05	5.54377e-05	8.1229e-05	6.6979e-05	5.214e-05	4.49197e-05	NagD protein
K02567	0.00013217	0.000118312	0.000134263	0.000131903	0.00012522	0.000133365	0.000129223	0.000124593	0.00014163	0.000134128	0.00013079	0.000136264	0.000134603	0.000133172	0.000126026	0.000132261	0.000141551	periplasmic nitrate reductase NapA [EC:1.7.99.-]
K02568	8.18637e-05	6.18702e-05	7.03134e-05	5.9022e-05	6.38975e-05	6.67395e-05	6.33879e-05	6.25576e-05	7.87847e-05	7.07597e-05	6.40252e-05	8.06517e-05	7.23978e-05	6.18001e-05	5.17356e-05	6.7174e-05	6.86286e-05	cytochrome c-type protein NapB
K02569	8.18804e-05	6.23941e-05	7.12079e-05	5.92925e-05	6.43085e-05	6.68368e-05	6.388e-05	6.29413e-05	7.90544e-05	7.10558e-05	6.47732e-05	8.11818e-05	7.27432e-05	6.19869e-05	5.21071e-05	6.72097e-05	6.90683e-05	cytochrome c-type protein NapC
K02570	8.18534e-05	6.13568e-05	6.9436e-05	5.8764e-05	6.34991e-05	6.66546e-05	6.29055e-05	6.21839e-05	7.85327e-05	7.04771e-05	6.32939e-05	8.01357e-05	7.2072e-05	6.16302e-05	5.13732e-05	6.71468e-05	6.82031e-05	periplasmic nitrate reductase NapD
K02571	7.22981e-05	4.5413e-05	5.53789e-05	4.96596e-05	5.4506e-05	5.7527e-05	5.00164e-05	5.14955e-05	6.28992e-05	5.77665e-05	5.48769e-05	6.48689e-05	6.3127e-05	5.05961e-05	4.44931e-05	5.96281e-05	6.08121e-05	periplasmic nitrate reductase NapE
K02572	1.3758e-06	2.18725e-06	2.09216e-06	2.78293e-06	2.21307e-06	8.90137e-07	2.00828e-06	2.49974e-06	1.18786e-06	1.61675e-06	1.9174e-06	1.22458e-06	1.15928e-06	1.40075e-06	2.42808e-06	1.26805e-06	2.11403e-06	ferredoxin-type protein NapF
K02573	1.02883e-08	5.13402e-07	8.77331e-07	2.57972e-07	3.98457e-07	8.48519e-08	4.82426e-07	3.73603e-07	2.51957e-07	2.8262e-07	7.31241e-07	5.15997e-07	3.25832e-07	1.69966e-07	3.62399e-07	2.72465e-08	4.25528e-07	ferredoxin-type protein NapG
K02574	2.70068e-08	5.56696e-07	9.32771e-07	3.23127e-07	4.71126e-07	1.46976e-07	5.31789e-07	4.30068e-07	2.79428e-07	3.34052e-07	7.70384e-07	5.51729e-07	3.52413e-07	1.97805e-07	4.27893e-07	5.85799e-08	4.56734e-07	ferredoxin-type protein NapH
K02575	0.000264956	0.000293034	0.000310069	0.00031909	0.000298932	0.000322059	0.000307153	0.000295477	0.000294689	0.000295426	0.000315656	0.000288113	0.000307644	0.000308643	0.000323981	0.000306188	0.000318232	MFS transporter, NNP family, nitrate/nitrite transporter
K02584	0.00138627	0.00122622	0.00132645	0.00132365	0.0012458	0.00146682	0.00128327	0.00128883	0.00156254	0.00140637	0.00135798	0.00151845	0.00137979	0.001265	0.0012248	0.0013615	0.00142144	Nif-specific regulatory protein
K02585	1.17315e-07	6.52906e-07	1.07489e-06	4.21906e-07	6.083e-07	2.05508e-07	6.42104e-07	5.48328e-07	4.07102e-07	4.21736e-07	8.97563e-07	6.56604e-07	5.0947e-07	3.53011e-07	5.19585e-07	1.5364e-07	5.73518e-07	nitrogen fixation protein NifB
K02586	7.97343e-08	6.0395e-07	1.03018e-06	3.6513e-07	5.33453e-07	1.79132e-07	5.74026e-07	4.64456e-07	3.84318e-07	3.93278e-07	8.58563e-07	6.3036e-07	4.71027e-07	3.03464e-07	4.40264e-07	1.01039e-07	5.46095e-07	nitrogenase molybdenum-iron protein alpha chain [EC:1.18.6.1]
K02587	9.25947e-08	6.24894e-07	1.06464e-06	3.90266e-07	5.58492e-07	2.04049e-07	5.93364e-07	4.84835e-07	4.19836e-07	4.20293e-07	8.92115e-07	6.58622e-07	5.10184e-07	3.37002e-07	4.58457e-07	1.17841e-07	5.74463e-07	nitrogenase molybdenum-cofactor synthesis protein NifE
K02588	6.59313e-06	9.22389e-06	8.38372e-06	6.56229e-06	8.03799e-06	8.78756e-06	8.99817e-06	7.00641e-06	1.02584e-05	1.04537e-05	7.31783e-06	9.73861e-06	6.13965e-06	6.87158e-06	7.28994e-06	7.64409e-06	7.66859e-06	nitrogenase iron protein NifH [EC:1.18.6.1]
K02591	7.97343e-08	6.0395e-07	1.03018e-06	3.6513e-07	5.33453e-07	1.79132e-07	5.74026e-07	4.64456e-07	3.84318e-07	3.93278e-07	8.58563e-07	6.3036e-07	4.71027e-07	3.03464e-07	4.40264e-07	1.01039e-07	5.46095e-07	nitrogenase molybdenum-iron protein beta chain [EC:1.18.6.1]
K02592	7.97343e-08	6.0395e-07	1.03018e-06	3.6513e-07	5.33453e-07	1.79132e-07	5.74026e-07	4.64456e-07	3.84318e-07	3.93278e-07	8.58563e-07	6.3036e-07	4.71027e-07	3.03464e-07	4.40264e-07	1.01039e-07	5.46095e-07	nitrogenase molybdenum-iron protein NifN
K02593	8.61645e-08	6.14422e-07	1.04741e-06	3.77698e-07	5.45973e-07	1.9159e-07	5.83695e-07	4.74646e-07	4.02077e-07	4.06785e-07	8.75339e-07	6.44491e-07	4.90606e-07	3.20233e-07	4.49361e-07	1.0944e-07	5.60279e-07	nitrogen fixation protein NifT
K02594	2.74548e-05	4.51658e-05	3.38115e-05	2.89825e-05	3.00765e-05	2.62898e-05	3.66073e-05	3.24654e-05	3.29492e-05	3.42505e-05	3.13817e-05	3.51814e-05	2.53219e-05	3.02436e-05	3.0482e-05	2.78711e-05	2.45939e-05	homocitrate synthase NifV [EC:2.3.3.14]
K02595	7.33041e-08	5.93477e-07	1.01295e-06	3.52562e-07	5.20933e-07	1.66673e-07	5.64358e-07	4.54267e-07	3.66559e-07	3.7977e-07	8.41788e-07	6.16228e-07	4.51449e-07	2.86696e-07	4.31168e-07	9.2638e-08	5.31911e-07	nitrogenase-stabilizing/protective protein
K02596	7.97343e-08	6.0395e-07	1.03018e-06	3.6513e-07	5.33453e-07	1.79132e-07	5.74026e-07	4.64456e-07	3.84318e-07	3.93278e-07	8.58563e-07	6.3036e-07	4.71027e-07	3.03464e-07	4.40264e-07	1.01039e-07	5.46095e-07	nitrogen fixation protein NifX
K02597	1.20887e-07	1.14507e-06	1.95699e-06	6.54853e-07	9.91787e-07	2.83513e-07	1.09004e-06	8.67778e-07	6.62081e-07	7.0551e-07	1.61647e-06	1.17593e-06	8.24584e-07	5.06316e-07	8.25951e-07	1.51672e-07	1.00708e-06	nitrogen fixation protein NifZ
K02598	1.02883e-08	5.13402e-07	8.77331e-07	2.57972e-07	3.98457e-07	8.48519e-08	4.82426e-07	3.73603e-07	2.51957e-07	2.8262e-07	7.31241e-07	5.15997e-07	3.25832e-07	1.69966e-07	3.62399e-07	2.72465e-08	4.25528e-07	nitrite transporter
K02599	1.2508e-05	1.79078e-05	1.11098e-05	1.53196e-05	2.42961e-05	1.42804e-05	1.46407e-05	1.59698e-05	1.66375e-05	1.56698e-05	1.5966e-05	1.8528e-05	1.45218e-05	2.03178e-05	1.51509e-05	1.4615e-05	1.46665e-05	Notch 1
K02600	0.000184268	0.000185247	0.00018735	0.000188668	0.000180642	0.000189815	0.000186056	0.000185791	0.00019273	0.000189829	0.000186661	0.000188986	0.000183918	0.000181566	0.000185	0.000184983	0.000188771	N utilization substance protein A
K02601	0.000187071	0.000189025	0.000189953	0.000191869	0.000183104	0.000192347	0.000188477	0.000188849	0.000195336	0.000192753	0.000189274	0.000191605	0.000186318	0.000184157	0.0001878	0.00018761	0.000191576	transcriptional antiterminator NusG
K02609	9.25007e-05	0.000107402	0.000105912	0.000116655	0.000109802	0.000110037	0.000113663	0.000117659	9.80339e-05	0.000104961	0.000112231	9.43399e-05	0.000101858	0.000113747	0.000125539	0.000106085	0.000108182	ring-1,2-phenylacetyl-CoA epoxidase subunit PaaA [EC:1.14.13.149]
K02610	8.79117e-05	0.000101388	0.000101896	0.000111282	0.000101981	0.000106649	0.000108	0.000109089	9.54043e-05	0.000100173	0.000107658	9.09533e-05	9.77608e-05	0.000106812	0.000118069	0.000101613	0.00010362	ring-1,2-phenylacetyl-CoA epoxidase subunit PaaB
K02611	8.79117e-05	0.000101388	0.000101896	0.000111282	0.000101981	0.000106649	0.000108	0.000109089	9.54043e-05	0.000100173	0.000107658	9.09533e-05	9.77608e-05	0.000106812	0.000118069	0.000101613	0.00010362	ring-1,2-phenylacetyl-CoA epoxidase subunit PaaC [EC:1.14.13.149]
K02612	8.79117e-05	0.000101388	0.000101896	0.000111282	0.000101981	0.000106649	0.000108	0.000109089	9.54043e-05	0.000100173	0.000107658	9.09533e-05	9.77608e-05	0.000106812	0.000118069	0.000101613	0.00010362	ring-1,2-phenylacetyl-CoA epoxidase subunit PaaD
K02613	0.000148144	0.000160396	0.00015264	0.000162272	0.000163838	0.000153042	0.000158796	0.000162638	0.000139482	0.000152913	0.000163662	0.000145051	0.000147381	0.000159645	0.000170342	0.000156255	0.000151111	ring-1,2-phenylacetyl-CoA epoxidase subunit PaaE
K02614	7.08262e-05	7.30059e-05	8.68331e-05	8.94375e-05	6.33205e-05	0.000102632	8.19417e-05	8.14738e-05	9.01268e-05	8.57835e-05	9.45908e-05	8.54886e-05	8.10971e-05	7.22798e-05	8.72822e-05	8.48613e-05	9.76004e-05	acyl-CoA thioesterase [EC:3.1.2.-]
K02615	0.000146799	0.000148714	0.000160203	0.000155945	0.000140774	0.00015939	0.000157013	0.000159994	0.000161664	0.000159432	0.000154754	0.000154356	0.000147875	0.000152515	0.000154134	0.000150958	0.000169455	3-oxo-5,6-didehydrosuberyl-CoA/3-oxoadipyl-CoA thiolase [EC:2.3.1.223 2.3.1.174]
K02616	7.95087e-05	0.000110885	8.69417e-05	8.29024e-05	0.000113499	6.36385e-05	9.27507e-05	9.48528e-05	4.82919e-05	7.47184e-05	8.48882e-05	6.23139e-05	7.59552e-05	0.000100569	9.86771e-05	8.10601e-05	7.51878e-05	phenylacetic acid degradation operon negative regulatory protein
[truncated: 5,188 more rows]
