# Supplementary material for: Secreted Rhizobacterial β-Glucosidase Unlocks Coumarin-Mediated Root Iron Uptake
Source: Research Square preprint supplement (doi:10.21203/rs.3.rs-5909771/v1), 2025-02-20
Supplement: Supplementary file 9 [file 6a96f38d2d2279193ce34bf7.xlsx]

## Sheet: Sheet1
Supplemental Table 1. List of Arabidopsis accessions used for the experiments
Metabolic pathway	Mutant Name	AGI code	Mutant ID	Muantion site	Reference
Glucosinolate	cyp79b2cyp79b3	AT4G39950/AT2G22330	cyp72B2cyp72B3(SALK)	Interted site: 1512-1513 bp/2334 bp,1425-1426 bp/2634 bp
	cyp81f2	AT5G57220	SALK_123882	Interted site: 177-178 bp/2018 bp
	cyp82c2	AT4G31970	GABI_261D12	Interted site: 1693-1694 bp/1951 bp
Camalexin	pen2	AT2G44490	GABI_134C04	Interted site: 983-984 bp/2970 bp
	pad3	AT3G26830	EMS line	deleted 450th G
	cyp71a13	AT2G30770	SALK_105136	Interted site: 1233-1234 bp/2218bp
	pen2pad3	AT2G44490/AT3G26830	EMS line/EMS line	replace 451th G to A,deleted 450th G
Lignin	fah	AT4G36220	CS875301
	cad4cad5	AT3G19450/AT4G34230	SAIL_1265_A06/SAIL_776_B06
	cse-2	At1G52760	SALK 023077
	cse-3	At1G52760	CRISPR/Cas9-induced-line	deleted large fragment from 161 to 999 bp
	ccr1	AT1G15950	GK-622C01
Ncotinate	ugt74f2	At2G43820	EMS line	625
	nic1	At2G22570	SALK_131410
	ugt74f2ugt76c4	At2G43820,At5g05880	CS25037
Terpenoids	gfpps1/2/3/4	AT3G14530/AT3G14550/AT3G29430/AT3G32040	CRISPR/Cas9-induced-line
	trp06/19/25/30	At1G70080/AT3G14540/AT3G29410/AT3G32030	CRISPR/Cas9-induced-line
Coumarin	f6'h1	AT3G13610	SALK_132418C
