# Supplementary material for: Secreted Rhizobacterial β-Glucosidase Unlocks Coumarin-Mediated Root Iron Uptake
Source: Research Square preprint supplement (doi:10.21203/rs.3.rs-5909771/v1), 2025-02-20
Supplement: Supplementary file 10 [file b7de594494c5f09bbfd367d5.xlsx]

## Sheet: Sheet1
Supplemental Table 11. MRM acquisition setting for the selected metabolites
Analyte	MRM transtion (m/z)	Polarity	Collision energy (V)
Scopolin	399 > 191	Negative	7
	399 > 176	Negative	34
Fraxin	369 > 207	Negative	18
	369 > 192	Negative	38
Esculin	339 > 177	Negative	21
	339 > 133	Negative	42
Scopoletin	193 > 178	Positive	26
	193 > 133	Positive	23
Fraxetin	209 > 194	Positive	26
	209 > 166	Positive	29
Esculetin	179 > 133	Positive	23
	179 > 123	Positive	23
