# Supplementary material for: Secreted Rhizobacterial β-Glucosidase Unlocks Coumarin-Mediated Root Iron Uptake
Source: Research Square preprint supplement (doi:10.21203/rs.3.rs-5909771/v1), 2025-02-20
Supplement: Supplementary file 11 [file d881030ebd300be6577551af.xlsx]

## Sheet: Sheet1
Supplemental Table 6. Node annotation of the co-occurrence network represents ASVs and functional enzymes connected with identified aromatic compounds.
Id	kingdom	phylum	class	order	family	genus	species	mics	modularity_class	Eccentricity	closnesscentrality	harmonicclosnesscentrality	betweenesscentrality	stat_inf_class	clustering	triangles	eigencentrality
OTU_3029	Bacteria	Verrucomicrobia	Opitutae	Opitutales	Opitutaceae	Opitutus	Opitutus_terrae	ASV	0	4	0.382246	0.414692	1.6e-05	70	0	0	0.052632
OTU_4793	Bacteria	Proteobacteria	Betaproteobacteria	Burkholderiales	Pseudomonadaceae	Rhizobacter	Aquabacterium_limnoticum	ASV	0	4	0.517157	0.618483	0.005746	34	0	0	0.842105
P50120				409.11	Khellol glucoside, Khelloside	C09011	Involved in pathways: . More specifically: . Also associated with compound classes: Phytochemical compounds, Polyketides, Pyrones, Chromones, C Khellol glucoside	Feature	0	3	0.535533	0.646919	0.018784	70	0	0	0
OTU_201	Bacteria	Actinobacteria	Actinobacteria	Actinomycetales	Nocardioidaceae	Nocardioides	Nocardioides_caricicola	ASV	1	4	0.532828	0.631517	0.008797	4	0	0	0.881579
OTU_313	Bacteria	Actinobacteria	Actinobacteria	Actinomycetales	Nocardioidaceae	Nocardioides	Nocardioides_furvisabuli	ASV	1	4	0.497642	0.595182	0.004542	5	0	0	0.75
OTU_365	Bacteria	Actinobacteria	Actinobacteria	Actinomycetales	Nocardioidaceae	Nocardioides	Nocardioides_terrigena	ASV	1	4	0.519704	0.619668	0.006895	44	0	0	0.842105
OTU_361	Bacteria	Proteobacteria	Gammaproteobacteria	Xanthomonadales	Xanthomonadaceae	Lysobacter	Lysobacter_terrae	ASV	1	4	0.507212	0.60782	0.004527	54	0	0	0.802632
OTU_461	Bacteria	Actinobacteria	Actinobacteria	Actinomycetales	Nocardioidaceae	Nocardioides	Nocardioides_exalbidus	ASV	1	4	0.507212	0.60387	0.005967	40	0	0	0.776316
OTU_462	Bacteria	Proteobacteria	Betaproteobacteria	Burkholderiales	Comamonadaceae	Hydrogenophaga	Hydrogenophaga_bisanensis	ASV	1	4	0.519704	0.619668	0.007911	9	0	0	0.842105
OTU_496	Bacteria	Proteobacteria	Betaproteobacteria	Burkholderiales	Comamonadaceae	Acidovorax	Caenimonas_terrae	ASV	1	4	0.519704	0.619668	0.007329	20	0	0	0.842105
OTU_618	Bacteria	Proteobacteria	Deltaproteobacteria	Myxococcales	Polyangiaceae	Chondromyces	Chondromyces_crocatus	ASV	1	4	0.519704	0.623618	0.010859	13	0	0	0.868421
OTU_628	Bacteria	Proteobacteria	Betaproteobacteria	Burkholderiales	Comamonadaceae	Hydrogenophaga	Hydrogenophaga_atypica	ASV	1	4	0.507212	0.605845	0.005457	12	0	0	0.789474
OTU_777	Bacteria	Proteobacteria	Deltaproteobacteria	Rhizobiales	Desulfuromonadaceae	Streptophyta	Pelobacter_acidigallici	ASV	1	4	0.5	0.598341	0.003894	14	0	0	0.763158
OTU_853	Bacteria	Proteobacteria	Alphaproteobacteria	Sphingomonadales	Sphingomonadaceae	Sphingopyxis	Sphingopyxis_bauzanensis	ASV	1	6	0.276903	0.299052	0	51	0	0	0.013158
OTU_909	Bacteria	Proteobacteria	Gammaproteobacteria	Xanthomonadales	Xanthomonadaceae	Lysobacter	Lysobacter_xinjiangensis	ASV	1	4	0.507212	0.60782	0.004803	66	0	0	0.802632
OTU_920	Bacteria	Proteobacteria	Alphaproteobacteria	Sphingomonadales	Sphingomonadaceae	Sphingomonas	Sphingomonas_sediminicola	ASV	1	4	0.481735	0.575039	0.002569	72	0	0	0.671053
OTU_974	Bacteria	Proteobacteria	Gammaproteobacteria	Oceanospirillales	Oceanospirillaceae	Hahella	Hahella_antarctica	ASV	1	4	0.522277	0.624803	0.006887	18	0	0	0.868421
OTU_1175	Bacteria	Proteobacteria	Deltaproteobacteria	Myxococcales	Phaselicystidaceae	Phaselicystis	Phaselicystis_flava	ASV	1	4	0.549479	0.634676	0.018402	52	0	0	0.855263
OTU_1201	Bacteria	Proteobacteria	Alphaproteobacteria	Rhizobiales	Piscirickettsiaceae	Thiomicrospira	Thiomicrospira_chilensis	ASV	1	4	0.495305	0.593997	0.003619	22	0	0	0.75
OTU_1215	Bacteria	Actinobacteria	Actinobacteria	Actinomycetales	Nocardioidaceae	Nocardioides	Nocardioides_furvisabuli	ASV	1	4	0.522277	0.622828	0.008198	47	0	0	0.855263
OTU_1355	Bacteria	Actinobacteria	Actinobacteria	Actinomycetales	Nocardioidaceae	Nocardioides	Nocardioides_terrigena	ASV	1	4	0.502381	0.601501	0.004428	61	0	0	0.776316
OTU_1349	Bacteria	Proteobacteria	Deltaproteobacteria	Myxococcales	Polyangiaceae	Minicystis	Minicystis_rosea	ASV	1	4	0.497642	0.595182	0.003813	21	0	0	0.75
OTU_1376	Bacteria	Proteobacteria	Betaproteobacteria	Burkholderiales	Comamonadaceae	Ramlibacter	Ramlibacter_henchirensis	ASV	1	4	0.5	0.600316	0.004195	22	0	0	0.776316
OTU_1515	Bacteria	Proteobacteria	Betaproteobacteria	Burkholderiales	Comamonadaceae	Caenimonas	Caenimonas_terrae	ASV	1	4	0.495305	0.593997	0.003735	23	0	0	0.75
OTU_1900	Bacteria	Proteobacteria	Betaproteobacteria	Burkholderiales	Comamonadaceae	Acidovorax	Pseudacidovorax_intermedius	ASV	1	6	0.293872	0.313665	0	42	0	0	0.013158
OTU_2141	Bacteria	Proteobacteria	Betaproteobacteria	Burkholderiales	Oxalobacteraceae	Herbaspirillum	Herbaspirillum_rubrisubalbicans	ASV	1	4	0.504785	0.60466	0.004608	24	0	0	0.789474
OTU_2428	Bacteria	Proteobacteria	Betaproteobacteria	Burkholderiales	Burkholderiales_incertae_sedis	Ideonella	Ideonella_dechloratans	ASV	1	6	0.276903	0.299052	0	51	0	0	0.013158
OTU_3484	Bacteria	Proteobacteria	Betaproteobacteria	Burkholderiales	Comamonadaceae	Ramlibacter	Acidovorax_avenae	ASV	1	4	0.524876	0.624013	0.007554	20	0	0	0.855263
N13012				447.092	Kaempferol 3-O-glucoside, Kaempferol 3-O-beta-D-glucoside, Astragalin	C12249	Involved in pathways: Flavone and flavonol biosynthesis, Biosynthesis of secondary metabolites. More specifically: . Also associated with compound classes: Lipids, PK Polyketides, PK Flavonoids, PK Flavones and Flavonols, C Astragalin, Phytochemical compounds, Flavonoids, Flavonols, C Kaempferol -O-glucoside, Glycosides, O-glycosides, Flavonoid glycosides, Flavones and flavonols	Feature	1	5	0.410506	0.468325	0.00058	35	0	0	0
N4710				241.217	12-Methyltetradecanoic acid	C16665	Involved in pathways: Two-component system. More specifically: . Also associated with compound classes: Lipids, FA Fatty acyls, FA Fatty Acids and Conjugates, FA Branched fatty acids, C -Methyltetradecanoic acid	Feature	1	5	0.382246	0.445972	0.019483	51	0	0	0
N5469				263.128	Abscisate, Abscisic acid, (+)-Abscisic acid, ABA	C06082	Involved in pathways: Carotenoid biosynthesis, Biosynthesis of plant secondary metabolites, Biosynthesis of terpenoids and steroids, Biosynthesis of plant hormones, Metabolic pathways, Biosynthesis of secondary metabolites, Plant hormone signal transduction. More specifically: Abscisic acid biosynthesis, beta-carotene => abscisic acid. Also associated with compound classes: Lipids, PR Prenol lipi…	Feature	1	3	0.509662	0.615324	0.005385	43	0	0	0
N6123				281.248	(9E)-Octadecenoic acid, 9-Octadecenoic acid, (E)-, (E)-Oleic acid, D9-trans-Octadecenoic acid, 9-trans-Octadecenoic acid, trans-D9-Octadecenoic acid, trans-9-Octadecenoic acid, trans-Elaidic acid, trans-Oleic acid, Elaidic acid, Acide elaidique, Elaidinsaure	C01712	Involved in pathways: . More specifically: . Also associated with compound classes: Compounds with biological roles, Lipids, Fatty acids, Unsaturated fatty acids, C Elaidic acid, FA Fatty acyls, FA Fatty Acids and Conjugates, FA Unsaturated fatty acids, Monounsaturated fatty acids, C -Octadec--enoic acid	Feature	1	5	0.415354	0.477804	0.010162	42	0	0	0
N8086				335.054	Dicumarol, Dicoumarol	C00796	Involved in pathways: . More specifically: . Also associated with compound classes: Phytochemical compounds, Phenylpropanoids, Coumarins, C Dicumarol, Anatomical Therapeutic Chemical classification, B BLOOD AND BLOOD FORMING ORGANS, B ANTITHROMBOTIC AGENTS, BA ANTITHROMBOTIC AGENTS, BAA Vitamin K antagonists, BAA Dicoumarol, Dicumarol, Target-based classification of drugs, Enzymes, Oxidoreductase…	Feature	1	4	0.5	0.60466	0.00566	50	0	0	0
N8448				341.122	Coniferin	C00761	Involved in pathways: Phenylpropanoid biosynthesis. More specifically: . Also associated with compound classes: Phytochemical compounds, Phenylpropanoids, Monolignols, Coniferyl alcohol derivatives, C Coniferin	Feature	1	3	0.490698	0.590047	0.003789	54	0	0	0
N9464				367.152	4-O-Methylxanthohumol, (2E)-1-[2,4-Dihydroxy-6-methoxy-3-(3-methylbut-2-en-1-yl)phenyl]-3-(4-methoxyphenyl)prop-2-en-1-one	C22048	Involved in pathways: Flavonoid biosynthesis. More specifically: . Also associated with compound classes:	Feature	1	5	0.410506	0.468325	0.00051	40	0	0	0
N9582				369.168	7-O-Geranyl-2-O,3-dimethylflaviolin	C21003	Involved in pathways: . More specifically: . Also associated with compound classes:	Feature	1	5	0.410506	0.468325	0.00058	63	0	0	0
P14352				209.029	1-Naphthalenesulfonic acid, Naphthalene-1-sulfonate	C16201	Involved in pathways: Naphthalene degradation. More specifically: . Also associated with compound classes:	Feature	1	3	0.5275	0.637441	0.006857	28	0	0	0
P16079				221.081	2,6-Dioxo-6-phenylhexanoate	C03750	Involved in pathways: . More specifically: . Also associated with compound classes:	Feature	1	3	0.502381	0.605845	0.004477	2	0	0	0
P16130				221.116	1,2-Dimethoxy-4-[2-(2-propenyloxy)ethenyl]-benzene	C12263	Involved in pathways: . More specifically: . Also associated with compound classes:	Feature	1	4	0.486175	0.585703	0.00341	23	0	0	0
P20604				249.148	Artabsin	C09301	Involved in pathways: . More specifically: . Also associated with compound classes: Phytochemical compounds, Terpenoids, Sesquiterpenoids, Guaianolide, C Artabsin	Feature	1	3	0.5	0.602686	0.005152	69	0	0	0
P21081				252.088	N-Feruloylglycine, N-[3-(4-Hydroxy-3-methoxyphenyl)-1-oxo-2-propen-1-yl]glycine	C02564	Involved in pathways: . More specifically: . Also associated with compound classes:	Feature	1	5	0.396617	0.445814	0.000251	35	0	0	0
P35143				329.125	Paeonoside	C10717	Involved in pathways: . More specifically: . Also associated with compound classes:	Feature	1	4	0.481735	0.579384	0.009362	5	0	0	0
P38893				349.056	IMP, Inosinic acid, Inosine monophosphate, Inosine 5'-monophosphate, Inosine 5'-phosphate, 5'-Inosinate, 5'-Inosinic acid, 5'-Inosine monophosphate, 5'-IMP	C00130	Involved in pathways: Purine metabolism, Biosynthesis of plant secondary metabolites, Biosynthesis of alkaloids derived from histidine and purine, Biosynthesis of plant hormones, Metabolic pathways, Biosynthesis of secondary metabolites, Biosynthesis of cofactors, Antifolate resistance, Taste transduction. More specifically: Inosine monophosphate biosynthesis, PRPP + glutamine => IMP, Adenine rib…	Feature	1	4	0.488426	0.588863	0.003609	18	0	0	0
P40217				355.041	Laricitrin, 3'-O-Methylmyricetin	C12633	Involved in pathways: Flavone and flavonol biosynthesis. More specifically: . Also associated with compound classes: Lipids, PK Polyketides, PK Flavonoids, PK Flavones and Flavonols, C Laricitrin, Phytochemical compounds, Flavonoids, Flavonols	Feature	1	5	0.413725	0.47267	0.000558	35	0	0	0
P40280				355.153	Cristacarpin	C10206	Involved in pathways: . More specifically: . Also associated with compound classes: Lipids, PK Polyketides, PK Flavonoids, PK Pterocarpans, C Cristacarpin, Phytochemical compounds, Flavonoids, Isoflavonoids, Pterocarpans	Feature	1	3	0.522277	0.631122	0.006305	34	0	0	0
P50130				409.122	Isosamidin	C09270	Involved in pathways: . More specifically: . Also associated with compound classes: Phytochemical compounds, Phenylpropanoids, Coumarins, C Isosamidin	Feature	1	4	0.458696	0.544629	0.00188	9	0	0	0
P58662				457.113	Naringenin 7-O-beta-D-glucoside, Prunin	C09099	Involved in pathways: Flavonoid biosynthesis. More specifically: . Also associated with compound classes: Lipids, PK Polyketides, PK Flavonoids, PK Flavanones, C Naringenin -O-beta-D-glucoside, Phytochemical compounds, Flavonoids, Flavanones, Glycosides, O-glycosides, Flavonoid glycosides	Feature	1	4	0.486175	0.585703	0.003929	12	0	0	0
P59196				460.17	Doronine, 4,8-Secosenecionan-8,11,16-trione, 15,20-dihydro-12-(acetyloxy)-20-chloro-15-hydroxy-4-methyl-	C10286	Involved in pathways: . More specifically: . Also associated with compound classes: Phytochemical compounds, Alkaloids, Alkaloids derived from ornithine, Pyrrolizidine alkaloids, C Doronine	Feature	1	4	0.497642	0.601501	0.006812	31	0	0	0
P7719				160.076	Indole-3-acetaldehyde, 2-(Indol-3-yl)acetaldehyde, Indoleacetaldehyde	C00637	Involved in pathways: Tryptophan metabolism, Metabolic pathways. More specifically: . Also associated with compound classes:	Feature	1	4	0.490698	0.592022	0.003904	32	0	0	0
P8074				163.04	Umbelliferone, 7-Hydroxycoumarin	C09315	Involved in pathways: Phenylpropanoid biosynthesis, Biosynthesis of phenylpropanoids, Biosynthesis of secondary metabolites. More specifically: . Also associated with compound classes: Phytochemical compounds, Phenylpropanoids, Coumarins, C Umbelliferone	Feature	1	4	0.483945	0.582543	0.003329	60	0	0	0
OTU_838	Bacteria	Proteobacteria	Betaproteobacteria	Burkholderiales	Burkholderiales_incertae_sedis	Tepidimonas	Kinneretia_asaccharophila	ASV	2	4	0.517157	0.618483	0.006368	7	0	0	0.842105
OTU_1619	Bacteria	Proteobacteria	Betaproteobacteria	Burkholderiales	Alcaligenaceae	Azohydromonas	Azohydromonas_australica	ASV	2	4	0.530151	0.632306	0.008912	36	0	0	0.894737
OTU_1719	Bacteria	Proteobacteria	Oligoflexia	Oligoflexales	Oligoflexaceae	Oligoflexus	Oligoflexus_tunisiensis	ASV	2	4	0.524876	0.625987	0.007421	77	0	0	0.868421
OTU_2342	Bacteria	Proteobacteria	Oligoflexia	Oligoflexales	Oligoflexaceae	Oligoflexus	Oligoflexus_tunisiensis	ASV	2	4	0.522277	0.622828	0.006637	26	0	0	0.855263
OTU_2621	Bacteria	Bacteroidetes	Cytophagia	Cytophagales	Cyclobacteriaceae	Algoriphagus	Algoriphagus_aquaeductus	ASV	2	4	0.564171	0.650474	0.022053	28	0	0	0.921053
OTU_3275	Bacteria	Proteobacteria	Oligoflexia	Oligoflexales	Oligoflexaceae	Oligoflexus	Oligoflexus_tunisiensis	ASV	2	4	0.524876	0.624013	0.011636	32	0	0	0.855263
OTU_3327	Bacteria	Proteobacteria	Oligoflexia	Oligoflexales	Oligoflexaceae	Oligoflexus	Oligoflexus_tunisiensis	ASV	2	4	0.552356	0.657583	0.029957	59	0	0	1
OTU_5172	Bacteria	Proteobacteria	Oligoflexia	Oligoflexales	Oligoflexaceae	Oligoflexus	Oligoflexus_tunisiensis	ASV	2	4	0.576503	0.661137	0.028539	39	0	0	0.960526
OTU_5503	Bacteria	Proteobacteria	Betaproteobacteria	Burkholderiales	Comamonadaceae	Zhizhongheella	Zhizhongheella_caldifontis	ASV	2	4	0.567204	0.651659	0.022217	63	0	0	0.921053
OTU_5683	Bacteria	Firmicutes	Bacilli	Bacillales	Thermoactinomycetaceae_1	Thermoactinomyces	Thermoactinomyces_intermedius	ASV	2	4	0.543814	0.648104	0.014716	39	0	0	0.960526
N11848				421.274	Volicitin, N-(17-Hydroxylinolenoyl)-L-glutamine	C16345	Involved in pathways: alpha-Linolenic acid metabolism. More specifically: . Also associated with compound classes: Lipids, FA Fatty acyls, FA Other Fatty Acyls, C Volicitin	Feature	2	4	0.390741	0.418246	7.9e-05	38	0	0	0
N1200				137.024	Salicylate, o-Hydroxybenzoic acid, Salicylic acid	C00805	Involved in pathways: Phenylalanine metabolism, Dioxin degradation, Polycyclic aromatic hydrocarbon degradation, Naphthalene degradation, Biosynthesis of siderophore group nonribosomal peptides, Biosynthesis of phenylpropanoids, Biosynthesis of plant hormones, Metabolic pathways, Biosynthesis of secondary metabolites, Microbial metabolism in diverse environments, Degradation of aromatic compounds…	Feature	2	5	0.374113	0.398341	8e-06	59	0	0	0
N7126				311.092	3,5,7-Trimethoxyflavone, Galangin 3,5,7-trimethyl ether, Chromen-4-one, 3,5,7-trimethoxy-2-phenyl-	C10045	Involved in pathways: . More specifically: . Also associated with compound classes: Lipids, PK Polyketides, PK Flavonoids, PK Flavones and Flavonols, C Galangin ,,-trimethyl ether, Phytochemical compounds, Flavonoids, Flavonols, C ,,-Trimethoxyflavone	Feature	2	4	0.434156	0.503555	0.001452	59	0	0	0
N7901				329.103	3',6'-Dihydroxy-2',4,4'-trimethoxy-chalcone, 1-(3,6-Dihydroxy-2,4-dimethoxyphenyl)-3-(4-methoxyphenyl)-2-propen-1-one	C14894	Involved in pathways: . More specifically: . Also associated with compound classes:	Feature	2	4	0.412109	0.46248	0.000393	0	0	0	0
N862				130.087	Leucine	C16439	Involved in pathways: . More specifically: . Also associated with compound classes:	Feature	2	5	0.356419	0.383886	0	59	0	0	0
N8693				347.186	Gibberellin A14	C11858	Involved in pathways: Diterpenoid biosynthesis, Metabolic pathways, Biosynthesis of secondary metabolites. More specifically: Gibberellin A1 biosynthesis, GGPP => GA1. Also associated with compound classes: Lipids, PR Prenol lipids, PR Isoprenoids, PR C isoprenoids, PR Gibberellins, C Gibberellin A, Phytochemical compounds, Terpenoids, Diterpenoids, Gibberellins	Feature	2	3	0.524876	0.634281	0.006699	66	0	0	0
P104853				1056.37	8,11,14-Eicosatrienoyl-CoA, 8,11,14-Icosatrienoyl-CoA, (8Z,11Z,14Z)-Icosatrienoyl-CoA, (8Z,11Z,14Z)-Icosa-8,11,14-trienoyl-CoA	C03595	Involved in pathways: Biosynthesis of unsaturated fatty acids, Fatty acid metabolism. More specifically: . Also associated with compound classes: Lipids, FA Fatty acyls, FA Fatty esters, FA Fatty acyl CoAs, C -Icosatrienoyl-CoA	Feature	2	5	0.371479	0.410821	4.9e-05	59	0	0	0
P21259				253.086	3'-Methoxyflavone	C20872	Involved in pathways: . More specifically: . Also associated with compound classes:	Feature	2	4	0.483945	0.582543	0.004268	29	0	0	0
P22297				259.191	Dibutyl adipate, Di-n-butyl adipate	C14253	Involved in pathways: . More specifically: . Also associated with compound classes:	Feature	2	4	0.45279	0.53515	0.001857	26	0	0	0
P32193				313.106	3,5,7-Trimethoxyflavone, Galangin 3,5,7-trimethyl ether, Chromen-4-one, 3,5,7-trimethoxy-2-phenyl-	C10045	Involved in pathways: . More specifically: . Also associated with compound classes: Lipids, PK Polyketides, PK Flavonoids, PK Flavones and Flavonols, C Galangin ,,-trimethyl ether, Phytochemical compounds, Flavonoids, Flavonols, C ,,-Trimethoxyflavone	Feature	2	4	0.422	0.483412	0.01029	78	0	0	0
P3457				125.06	3-Hydroxybenzyl alcohol, 3-Hydroxybenzenemethanol	C03351	Involved in pathways: Toluene degradation, Microbial metabolism in diverse environments, Degradation of aromatic compounds. More specifically: . Also associated with compound classes:	Feature	2	3	0.483945	0.580569	0.003957	73	0	0	0
P37047				339.107	p-Coumaroyl quinic acid, trans-5-O-(4-Coumaroyl)-D-quinate	C12208	Involved in pathways: Phenylpropanoid biosynthesis, Flavonoid biosynthesis, Stilbenoid, diarylheptanoid and gingerol biosynthesis, Biosynthesis of secondary metabolites. More specifically: . Also associated with compound classes:	Feature	2	4	0.401141	0.442338	0.00025	38	0	0	0
P54187				431.133	Ononin, Formononetin 7-O-glucoside	C10509	Involved in pathways: Isoflavonoid biosynthesis. More specifically: . Also associated with compound classes: Lipids, PK Polyketides, PK Flavonoids, PK Isoflavonoids, C Ononin, Phytochemical compounds, Flavonoids, Isoflavonoids, Isoflavones, Glycosides, O-glycosides, Flavonoid glycosides	Feature	2	4	0.405769	0.449842	0.000398	78	0	0	0
P7315				157.065	1-Naphthaldehyde, 1-Formylnaphthalene	C14090	Involved in pathways: Naphthalene degradation, Microbial metabolism in diverse environments, Degradation of aromatic compounds. More specifically: . Also associated with compound classes:	Feature	2	4	0.407336	0.453002	0.000299	51	0	0	0
P7580				159.08	(2-Naphthyl)methanol, 2-Naphthalenemethanol, 2-Hydroxymethylnaphthalene	C02909	Involved in pathways: Naphthalene degradation, Microbial metabolism in diverse environments, Degradation of aromatic compounds. More specifically: . Also associated with compound classes:	Feature	2	4	0.418651	0.475118	0.000671	36	0	0	0
P89086				701.372	Chalcomycin	C15678	Involved in pathways: . More specifically: . Also associated with compound classes:	Feature	2	4	0.473094	0.566746	0.003341	14	0	0	0
K21104		poly(ethylene terephthalate) hydrolase [EC:3.1.1.101]					Polycyclic aromatic hydrocarbon degradation	FRD	2	4	0.530151	0.630332	0.008567	77	0	0	0.881579
K21613		uncharacterized hydrolase [EC:3.-.-.-]						FRD	2	5	0.297183	0.316272	0	78	0	0	0.013158
OTU_50	Bacteria	Proteobacteria	Alphaproteobacteria	Rhizobiales	Hyphomicrobiaceae	Devosia	Devosia_chinhatensis	ASV	3	5	0.30758	0.329937	0	0	0	0	0.013158
OTU_151	Bacteria	Proteobacteria	Alphaproteobacteria	Rhizobiales	Hyphomicrobiaceae	Devosia	Devosia_chinhatensis	ASV	3	4	0.423695	0.486177	0.001233	44	0	0	0.315789
OTU_221	Bacteria	Proteobacteria	Gammaproteobacteria	Pseudomonadales	Pseudomonadaceae	Permianibacter	Permianibacter_aggregans	ASV	3	4	0.439583	0.516588	0.001109	31	0	0	0.447368
OTU_239	Bacteria	Proteobacteria	Gammaproteobacteria	Xanthomonadales	Xanthomonadaceae	Arenimonas	Arenimonas_metalli	ASV	3	4	0.382246	0.416667	4.2e-05	49	0	0	0.065789
OTU_398	Bacteria	Proteobacteria	Alphaproteobacteria	Desulfuromonadales	Chloroplast	Streptophyta	Novispirillum_itersonii_subsp._nipponicum	ASV	3	4	0.492991	0.588863	0.003334	2	0	0	0.723684
OTU_489	Bacteria	Actinobacteria	Actinobacteria	Actinomycetales	Pseudonocardiaceae	Lechevalieria	Lechevalieria_nigeriaca	ASV	3	4	0.420319	0.481833	0.000582	6	0	0	0.302632
OTU_501	Bacteria	Proteobacteria	Deltaproteobacteria	Myxococcales	Nannocystaceae	Chondromyces	Chondromyces_crocatus	ASV	3	4	0.413725	0.46722	0.001579	70	0	0	0.236842
OTU_1067	Bacteria	Bacteroidetes	Sphingobacteriia	Sphingobacteriales	Sphingobacteriaceae	Pedobacter	Pedobacter_bauzanensis	ASV	3	5	0.344771	0.37575	2e-06	19	0	0	0.026316
OTU_1106	Bacteria	Chloroflexi	Chloroflexia	Herpetosiphonales	Herpetosiphonaceae	Herpetosiphon	Vulcaniibacterium_thermophilum	ASV	3	4	0.507212	0.60782	0.00493	75	0	0	0.802632
OTU_1197	Bacteria	Proteobacteria	Betaproteobacteria	Burkholderiales	Burkholderiales_incertae_sedis	Ideonella	Ideonella_dechloratans	ASV	3	4	0.490698	0.591627	0.004138	75	0	0	0.75
OTU_1366	Bacteria	Proteobacteria	Alphaproteobacteria	Rhizobiales	Phyllobacteriaceae	Mesorhizobium	Mesorhizobium_gobiense	ASV	3	4	0.447034	0.529226	0.001328	68	0	0	0.5
OTU_1853	Bacteria	Proteobacteria	Alphaproteobacteria	Caulobacterales	Caulobacteraceae	Brevundimonas	Brevundimonas_basaltis	ASV	3	4	0.509662	0.610979	0.008405	13	0	0	0.815789
OTU_2252	Bacteria	Proteobacteria	Alphaproteobacteria	Sphingomonadales	Sphingomonadaceae	Sphingomonas	Clostridium_alkalicellulosi	ASV	3	4	0.439583	0.516588	0.00121	3	0	0	0.447368
OTU_2425	Bacteria	Proteobacteria	Deltaproteobacteria	Myxococcales	Haliangiaceae	Haliangium	Haliangium_tepidum	ASV	3	4	0.427126	0.488547	0.001395	36	0	0	0.315789
OTU_2441	Bacteria	Proteobacteria	Deltaproteobacteria	Bdellovibrionales	Bdellovibrionaceae	Bdellovibrio	Bdellovibrio_bacteriovorus	ASV	3	4	0.404215	0.454186	0.000278	29	0	0	0.197368
OTU_2957	Bacteria	Verrucomicrobia	Opitutae	Opitutales	Opitutaceae	Opitutus	Opitutus_terrae	ASV	3	4	0.374113	0.407583	1.1e-05	31	0	0	0.052632
OTU_6045	Bacteria	Proteobacteria	Deltaproteobacteria	Bdellovibrionales	Bdellovibrionaceae	Bdellovibrio	Bdellovibrio_bacteriovorus	ASV	3	4	0.504785	0.602686	0.004473	53	0	0	0.776316
OTU_6388	Bacteria	Proteobacteria	Deltaproteobacteria	Bdellovibrionales	Bdellovibrionaceae	Bdellovibrio	Bdellovibrio_bacteriovorus	ASV	3	4	0.497642	0.593207	0.003997	55	0	0	0.736842
N6659				297.113	Enterolactone	C18165	Involved in pathways: . More specifically: . Also associated with compound classes:	Feature	3	4	0.541026	0.655213	0.010311	45	0	0	0
P20550				249.091	Pyrimethamine	C07391	Involved in pathways: . More specifically: . Also associated with compound classes: Carcinogens, Group : Not classifiable as to its carcinogenicity to humans, Compounds, C Pyrimethamine, Anatomical Therapeutic Chemical classification, P ANTIPARASITIC PRODUCTS, INSECTICIDES AND REPELLENTS, P ANTIPROTOZOALS, PB ANTIMALARIALS, PBD Diaminopyrimidines, PBD Pyrimethamine, Pyrimethamine &lt;US&gt;, USP …	Feature	3	3	0.546632	0.659558	0.018212	74	0	0	0
P24320				271.096	Prenyl caffeate	C10487	Involved in pathways: . More specifically: . Also associated with compound classes:	Feature	3	4	0.443277	0.519352	0.012358	0	0	0	0
P29582				299.129	Enterolactone	C18165	Involved in pathways: . More specifically: . Also associated with compound classes:	Feature	3	4	0.479545	0.576224	0.010389	19	0	0	0
P31446				309.097	Allamandin	C09766	Involved in pathways: . More specifically: . Also associated with compound classes: Phytochemical compounds, Terpenoids, Monoterpenoids, Iridoids, C Allamandin	Feature	3	3	0.535533	0.646919	0.007957	62	0	0	0
P53390				427.121	Scandoside methyl ester	C09798	Involved in pathways: . More specifically: . Also associated with compound classes: Phytochemical compounds, Terpenoids, Monoterpenoids, Iridoids, C Scandoside methyl ester, Glycosides, O-glycosides, Iridoid glycosides	Feature	3	5	0.344771	0.377093	1.1e-05	70	0	0	0
P58671				457.149	Steganacin, (-)-Steganacin	C10886	Involved in pathways: Biosynthesis of phenylpropanoids, Biosynthesis of secondary metabolites. More specifically: . Also associated with compound classes: Phytochemical compounds, Phenylpropanoids, Lignans, C Steganacin, Target-based classification of compounds, Others, Cytoskeleton proteins, beta-tubulin	Feature	3	3	0.56117	0.675355	0.015579	16	0	0	0
P66497				505.17	Sergeolide	C08782	Involved in pathways: . More specifically: . Also associated with compound classes: Phytochemical compounds, Terpenoids, Triterpenoids, Dammarenes, C Sergeolide	Feature	3	3	0.497642	0.599526	0.010264	21	0	0	0
P66502				505.172	Sergeolide	C08782	Involved in pathways: . More specifically: . Also associated with compound classes: Phytochemical compounds, Terpenoids, Triterpenoids, Dammarenes, C Sergeolide	Feature	3	4	0.5	0.60466	0.011975	6	0	0	0
P71821				541.168	2''-o-p-Coumaroylaloesin	C17781	Involved in pathways: . More specifically: . Also associated with compound classes:	Feature	3	3	0.552356	0.665877	0.010093	27	0	0	0
P91453				731.258	4'-Cinnamoylmussatioside	C10439	Involved in pathways: . More specifically: . Also associated with compound classes:	Feature	3	3	0.532828	0.64376	0.008015	24	0	0	0
K01788		N-acylglucosamine-6-phosphate 2-epimerase [EC:5.1.3.9]					Amino sugar and nucleotide sugar metabolism	FRD	3	4	0.405769	0.457346	0.00036	78	0	0	0.210526
K13016		UDP-N-acetyl-2-amino-2-deoxyglucuronate dehydrogenase [EC:1.1.1.335]					O-Antigen nucleotide sugar biosynthesis	FRD	3	4	0.413725	0.473144	0.001397	65	0	0	0.276316
K15546		XRE family transcriptional regulator, aerobic/anaerobic benzoate catabolism transcriptional regulator						FRD	3	4	0.363793	0.398104	0.000157	65	0	0	0.052632
K21011		polysaccharide biosynthesis protein PelF					Biofilm formation - Pseudomonas aeruginosa	FRD	3	4	0.473094	0.566351	0.00312	0	0	0	0.644737
OTU_246	Bacteria	Actinobacteria	Actinobacteria	Actinomycetales	Micromonosporaceae	Actinoplanes	Actinoplanes_capillaceus	ASV	4	5	0.337061	0.365482	0	56	0	0	0.013158
OTU_446	Bacteria	Proteobacteria	Deltaproteobacteria	Myxococcales	Polyangiaceae	Chondromyces	Phaselicystis_flava	ASV	4	4	0.405769	0.451422	0.000195	57	0	0	0.171053
OTU_929	Bacteria	Proteobacteria	Deltaproteobacteria	Bdellovibrionales	Bacteriovoracaceae	Halobacteriovorax	Halobacteriovorax_litoralis	ASV	4	4	0.380866	0.413507	1.2e-05	49	0	0	0.052632
OTU_1687	Bacteria	Proteobacteria	Deltaproteobacteria	Myxococcales	Phaselicystidaceae	Phaselicystis	Phaselicystis_flava	ASV	4	5	0.362543	0.393523	3e-06	49	0	0	0.026316
OTU_2077	Bacteria	Proteobacteria	Betaproteobacteria	Burkholderiales	Comamonadaceae	Pelomonas	Sphaerotilus_hippei	ASV	4	4	0.522277	0.620853	0.007279	51	0	0	0.842105
OTU_2566	Bacteria	Proteobacteria	Gammaproteobacteria	Xanthomonadales	Xanthomonadaceae	Lysobacter	Lysobacter_oligotrophicus	ASV	4	4	0.497642	0.597156	0.007468	30	0	0	0.763158
OTU_2849	Bacteria	Proteobacteria	Betaproteobacteria	Burkholderiales	Alcaligenaceae	Azohydromonas	Azohydromonas_australica	ASV	4	4	0.479545	0.577804	0.002357	43	0	0	0.697368
OTU_3349	Bacteria	Proteobacteria	Alphaproteobacteria	Sphingomonadales	Erythrobacteraceae	Erythrobacter	Erythrobacter_citreus	ASV	4	4	0.398113	0.441548	0.000107	49	0	0	0.144737
N8085				335.054	Dicumarol, Dicoumarol	C00796	Involved in pathways: . More specifically: . Also associated with compound classes: Phytochemical compounds, Phenylpropanoids, Coumarins, C Dicumarol, Anatomical Therapeutic Chemical classification, B BLOOD AND BLOOD FORMING ORGANS, B ANTITHROMBOTIC AGENTS, BA ANTITHROMBOTIC AGENTS, BAA Vitamin K antagonists, BAA Dicoumarol, Dicumarol, Target-based classification of drugs, Enzymes, Oxidoreductase…	Feature	4	4	0.56117	0.67733	0.025548	49	0	0	0
N8419				341.088	Caffeic acid 3-glucoside	C10431	Involved in pathways: . More specifically: . Also associated with compound classes:	Feature	4	4	0.507212	0.614139	0.020604	55	0	0	0
N9182				359.113	2,3-Dihydro-2-(4-hydroxyphenyl)-5,6,7,8-tetramethoxy-4H-1-benzopyran-4-one	C14940	Involved in pathways: . More specifically: . Also associated with compound classes:	Feature	4	3	0.576503	0.691153	0.022254	76	0	0	0
P22718				262.071	Oxolinic acid	C11342	Involved in pathways: . More specifically: . Also associated with compound classes: Pesticides, Fungicides, Quinone fungicides, C Oxolinic acid, Anatomical Therapeutic Chemical classification, J ANTIINFECTIVES FOR SYSTEMIC USE, J ANTIBACTERIALS FOR SYSTEMIC USE, JM QUINOLONE ANTIBACTERIALS, JMB Other quinolones, JMB Oxolinic acid, Oxolinic acid, Animal drugs in Japan, Agents against pathogenic mi…	Feature	4	4	0.56117	0.67733	0.013495	1	0	0	0
P59733				463.222	Patrinoside	C11640	Involved in pathways: . More specifically: . Also associated with compound classes: Glycosides, O-glycosides, Iridoid glycosides, C Patrinoside	Feature	4	5	0.357627	0.387046	3e-06	59	0	0	0
K19156		antitoxin PrlF						FRD	4	4	0.382246	0.412717	5e-06	49	0	0	0.039474
OTU_68	Bacteria	Actinobacteria	Actinobacteria	Actinomycetales	Pseudonocardiaceae	Lentzea	Lentzea_flaviverrucosa	ASV	5	4	0.385036	0.422986	6.8e-05	49	0	0	0.092105
OTU_111	Bacteria	Actinobacteria	Actinobacteria	Actinomycetales	Pseudonocardiaceae	Lentzea	Lentzea_flaviverrucosa	ASV	5	4	0.483945	0.576224	0.002823	67	0	0	0.671053
OTU_705	Bacteria	Proteobacteria	Gammaproteobacteria	Xanthomonadales	Xanthomonadaceae	Arenimonas	Arenimonas_metalli	ASV	5	4	0.386447	0.426145	0.000246	51	0	0	0.105263
OTU_704	Bacteria	Actinobacteria	Actinobacteria	Actinomycetales	Pseudonocardiaceae	Lechevalieria	Lechevalieria_nigeriaca	ASV	5	4	0.522277	0.620853	0.0083	7	0	0	0.842105
OTU_876	Bacteria	Proteobacteria	Gammaproteobacteria	Pseudomonadales	Pseudomonadaceae	Rhizobacter	Piscinibacter_aquaticus	ASV	5	5	0.335987	0.366272	2e-06	49	0	0	0.026316
OTU_1273	Bacteria	Proteobacteria	Betaproteobacteria	Burkholderiales	Burkholderiales_incertae_sedis	Ideonella	Ideonella_azotifigens	ASV	5	5	0.331761	0.359558	0	49	0	0	0.013158
OTU_1346	Bacteria	Actinobacteria	Actinobacteria	Actinomycetales	Nocardioidaceae	Nocardioides	Nocardioides_terrigena	ASV	5	5	0.347039	0.376145	0	56	0	0	0.013158
OTU_2160	Bacteria	Proteobacteria	Deltaproteobacteria	Myxococcales	Polyangiaceae	Chondromyces	Phaselicystis_flava	ASV	5	4	0.402672	0.447077	0.000183	49	0	0	0.157895
OTU_3865	Bacteria	Actinobacteria	Actinobacteria	Actinomycetales	Micromonosporaceae	Catelliglobosispora	Catelliglobosispora_koreensis	ASV	5	4	0.490698	0.587678	0.003186	16	0	0	0.723684
N1878				161.025	Umbelliferone, 7-Hydroxycoumarin	C09315	Involved in pathways: Phenylpropanoid biosynthesis, Biosynthesis of phenylpropanoids, Biosynthesis of secondary metabolites. More specifically: . Also associated with compound classes: Phytochemical compounds, Phenylpropanoids, Coumarins, C Umbelliferone	Feature	5	3	0.552356	0.665877	0.012433	30	0	0	0
N6726				299.077	4-(beta-D-Glucosyloxy)benzoate, 4-Hydroxybenzoate-O-glucoside	C03993	Involved in pathways: Ubiquinone and other terpenoid-quinone biosynthesis. More specifically: . Also associated with compound classes:	Feature	5	4	0.549479	0.664692	0.011817	58	0	0	0
N6727				299.077	4-(beta-D-Glucosyloxy)benzoate, 4-Hydroxybenzoate-O-glucoside	C03993	Involved in pathways: Ubiquinone and other terpenoid-quinone biosynthesis. More specifically: . Also associated with compound classes:	Feature	5	4	0.495305	0.598341	0.025315	47	0	0	0
N8430				341.089	Caffeic acid 3-glucoside	C10431	Involved in pathways: . More specifically: . Also associated with compound classes:	Feature	5	4	0.530151	0.642575	0.018475	56	0	0	0
P38568				347.152	Gibberellin A3, Gibberellic acid, Gibberellin	C01699	Involved in pathways: Diterpenoid biosynthesis, Biosynthesis of secondary metabolites. More specifically: . Also associated with compound classes: Lipids, PR Prenol lipids, PR Isoprenoids, PR C isoprenoids, PR Gibberellins, C Gibberellin A, Phytochemical compounds, Terpenoids, Diterpenoids, Gibberellins, Pesticides, Plant growth regulators, Others	Feature	5	4	0.486175	0.585703	0.013834	67	0	0	0
K07250		4-aminobutyrate aminotransferase / (S)-3-amino-2-methylpropionate transaminase [EC:2.6.1.19 2.6.1.22]					Valine, leucine and isoleucine degradation	FRD	5	5	0.335987	0.366272	2e-06	49	0	0	0.026316
K13890		glutathione transport system permease protein					ABC transporters	FRD	5	4	0.5	0.598341	0.004014	52	0	0	0.763158
P75789				569.24	Lappaol D	C17812	Involved in pathways: . More specifically: . Also associated with compound classes:	Feature	6	5	0.401141	0.453318	0.101856	63	0	0	0
K00255		long-chain-acyl-CoA dehydrogenase [EC:1.3.8.8]					Fatty acid metabolism	FRD	6	6	0.286685	0.304107	0	63	0	0	0.013158
K01502		aliphatic nitrilase [EC:3.5.5.7]					Styrene degradation	FRD	6	6	0.286685	0.304107	0	63	0	0	0.013158
K02077		zinc/manganese transport system substrate-binding protein						FRD	6	6	0.286685	0.304107	0	63	0	0	0.013158
K02433		aspartyl-tRNA(Asn)/glutamyl-tRNA(Gln) amidotransferase subunit A [EC:6.3.5.6 6.3.5.7]					Aminoacyl-tRNA biosynthesis	FRD	6	6	0.286685	0.304107	0	63	0	0	0.013158
K03502		DNA polymerase V						FRD	6	6	0.286685	0.304107	0	63	0	0	0.013158
K05296		3(or 17)beta-hydroxysteroid dehydrogenase [EC:1.1.1.51]					Steroid degradation	FRD	6	6	0.286685	0.304107	0	63	0	0	0.013158
K06876		deoxyribodipyrimidine photolyase-related protein						FRD	6	6	0.286685	0.304107	0	63	0	0	0.013158
K09996		arginine transport system substrate-binding protein					ABC transporters	FRD	6	6	0.286685	0.304107	0	63	0	0	0.013158
K11076		putrescine transport system ATP-binding protein					ABC transporters	FRD	6	6	0.286685	0.304107	0	63	0	0	0.013158
K13892		glutathione transport system ATP-binding protein					ABC transporters	FRD	6	6	0.286685	0.304107	0	63	0	0	0.013158
K20757		threo-3-hydroxy-D-aspartate ammonia-lyase [EC:4.3.1.27]						FRD	6	6	0.286685	0.304107	0	63	0	0	0.013158
OTU_65	Bacteria	Actinobacteria	Actinobacteria	Actinomycetales	Nocardioidaceae	Nocardioides	Nocardioides_furvisabuli	ASV	7	4	0.43595	0.514218	0.000776	45	0	0	0.447368
OTU_163	Bacteria	Actinobacteria	Actinobacteria	Actinomycetales	Nocardioidaceae	Nocardioides	Nocardioides_furvisabuli	ASV	7	4	0.464758	0.553712	0.002383	35	0	0	0.592105
OTU_243	Bacteria	Actinobacteria	Actinobacteria	Actinomycetales	Pseudonocardiaceae	Lentzea	Lentzea_flaviverrucosa	ASV	7	4	0.470982	0.559242	0.003385	42	0	0	0.605263
OTU_316	Bacteria	Actinobacteria	Actinobacteria	Actinomycetales	Promicromonosporaceae	Promicromonospora	Promicromonospora_xylanilytica	ASV	7	4	0.413725	0.477093	0.00049	40	0	0	0.302632
OTU_422	Bacteria	Proteobacteria	Alphaproteobacteria	Rhizobiales	Chloroplast	Streptophyta	Geobacter_toluenoxydans	ASV	7	4	0.441423	0.519747	0.001114	56	0	0	0.460526
OTU_431	Bacteria	Proteobacteria	Deltaproteobacteria	Myxococcales	Haliangiaceae	Haliangium	Haliangium_tepidum	ASV	7	4	0.428862	0.499605	0.000814	42	0	0	0.381579
OTU_575	Bacteria	Actinobacteria	Actinobacteria	Actinomycetales	Micromonosporaceae	Luedemannella	Luedemannella_helvata	ASV	7	4	0.475225	0.567536	0.002055	64	0	0	0.644737
OTU_635	Bacteria	Proteobacteria	Deltaproteobacteria	Myxococcales	Haliangiaceae	Haliangium	Haliangium_tepidum	ASV	7	4	0.462719	0.548578	0.002851	10	0	0	0.565789
OTU_915	Bacteria	Proteobacteria	Deltaproteobacteria	Myxococcales	Myxococcaceae	Corallococcus	Corallococcus_coralloides	ASV	7	4	0.439583	0.508689	0.00181	62	0	0	0.394737
OTU_941	Bacteria	Actinobacteria	Actinobacteria	Actinomycetales	Promicromonosporaceae	Isoptericola	Isoptericola_dokdonensis	ASV	7	4	0.441423	0.519747	0.001233	11	0	0	0.460526
OTU_1206	Bacteria	Actinobacteria	Actinobacteria	Actinomycetales	Nocardioidaceae	Nocardioides	Nocardioides_furvisabuli	ASV	7	4	0.418651	0.486572	0.001193	4	0	0	0.342105
OTU_1408	Bacteria	Proteobacteria	Betaproteobacteria	Burkholderiales	Pseudomonadaceae	Rhizobacter	Piscinibacter_aquaticus	ASV	7	4	0.462719	0.550553	0.0016	74	0	0	0.578947
OTU_1867	Bacteria	Proteobacteria	Alphaproteobacteria	Rhizobiales	Rhizobiaceae	Rhizobium	Rhizobium_daejeonense	ASV	7	4	0.475225	0.563586	0.003542	8	0	0	0.618421
OTU_2079	Bacteria	Proteobacteria	Deltaproteobacteria	Myxococcales	Haliangiaceae	Haliangium	Haliangium_tepidum	ASV	7	4	0.447034	0.527251	0.001462	41	0	0	0.486842
OTU_2211	Bacteria	Bacteroidetes	Cytophagia	Cytophagales	Cytophagaceae	Chryseolinea	Chryseolinea_serpens	ASV	7	4	0.458696	0.550158	0.00159	48	0	0	0.592105
OTU_2991	Bacteria	Proteobacteria	Oligoflexia	Oligoflexales	Oligoflexaceae	Oligoflexus	Oligoflexus_tunisiensis	ASV	7	4	0.454741	0.541864	0.001397	27	0	0	0.552632
OTU_3908	Bacteria	Verrucomicrobia	Subdivision3	Unassigned	Unassigned	Subdivision3_genera_incertae_sedis	Unassigned	ASV	7	4	0.43595	0.514218	0.000963	71	0	0	0.447368
OTU_5875	Bacteria	Actinobacteria	Actinobacteria	Actinomycetales	Thermomonosporaceae	Actinocorallia	Actinocorallia_herbida	ASV	7	4	0.428862	0.499605	0.000815	1	0	0	0.381579
N1101				135.045	Phenylacetic acid, Benzylformic acid, Phenylacetate, Benzeneacetic acid	C07086	Involved in pathways: Phenylalanine metabolism, Styrene degradation, Metabolic pathways, Microbial metabolism in diverse environments. More specifically: Phenylacetate degradation, phenylaxetate => acetyl-CoA/succinyl-CoA. Also associated with compound classes:	Feature	7	3	0.546632	0.659558	0.009911	57	0	0	0
N2060				165.019	4-Formylsalicylic acid, 4-Formyl-2-hydroxybenzoic acid	C14100	Involved in pathways: Naphthalene degradation, Microbial metabolism in diverse environments. More specifically: . Also associated with compound classes:	Feature	7	3	0.532828	0.64376	0.007161	41	0	0	0
N26541				791.185	Cyanidin 3-rutinoside 5-glucoside chloride	C04787	Involved in pathways: . More specifically: . Also associated with compound classes:	Feature	7	3	0.558201	0.672196	0.010232	37	0	0	0
N7139				311.113	4-Hydroxycinnamyl alcohol 4-D-glucoside, p-Coumaryl alcohol 4-O-glucoside	C05855	Involved in pathways: Phenylpropanoid biosynthesis. More specifically: . Also associated with compound classes: Phytochemical compounds, Phenylpropanoids, Monolignols, Paracoumaryl alcohol derivatives, C -Hydroxycinnamyl alcohol -D-glucoside	Feature	7	3	0.549479	0.662717	0.008941	48	0	0	0
N8091				335.077	5-O-Caffeoylshikimic acid	C10434	Involved in pathways: Phenylpropanoid biosynthesis, Flavonoid biosynthesis, Stilbenoid, diarylheptanoid and gingerol biosynthesis, Metabolic pathways, Biosynthesis of secondary metabolites. More specifically: Monolignol biosynthesis, phenylalanine/tyrosine => monolignol. Also associated with compound classes: Phytochemical compounds, Phenylpropanoids, Monolignols, Caffeate derivatives, C -O-Caffe…	Feature	7	3	0.567204	0.681675	0.012464	53	0	0	0
N8095				335.077	5-O-Caffeoylshikimic acid	C10434	Involved in pathways: Phenylpropanoid biosynthesis, Flavonoid biosynthesis, Stilbenoid, diarylheptanoid and gingerol biosynthesis, Metabolic pathways, Biosynthesis of secondary metabolites. More specifically: Monolignol biosynthesis, phenylalanine/tyrosine => monolignol. Also associated with compound classes: Phytochemical compounds, Phenylpropanoids, Monolignols, Caffeate derivatives, C -O-Caffe…	Feature	7	3	0.57337	0.687994	0.013662	46	0	0	0
N8749				349.202	Chalcolactone	C18848	Involved in pathways: . More specifically: . Also associated with compound classes:	Feature	7	3	0.56117	0.675355	0.010656	71	0	0	0
N9315				363.181	Gibberellin A37 open lactone	C11859	Involved in pathways: Diterpenoid biosynthesis, Metabolic pathways, Biosynthesis of secondary metabolites. More specifically: Gibberellin A1 biosynthesis, GGPP => GA1. Also associated with compound classes: Lipids, PR Prenol lipids, PR Isoprenoids, PR C isoprenoids, PR Gibberellins, C Gibberellin A open lactone, Phytochemical compounds, Terpenoids, Diterpenoids, Gibberellins	Feature	7	3	0.546632	0.659558	0.008614	8	0	0	0
P13476				203.071	3-Hydroxy-5-methyl-1-naphthoate	C20805	Involved in pathways: . More specifically: . Also associated with compound classes:	Feature	7	3	0.546632	0.659558	0.008695	68	0	0	0
P14353				209.027	1-Naphthalenesulfonic acid, Naphthalene-1-sulfonate	C16201	Involved in pathways: Naphthalene degradation. More specifically: . Also associated with compound classes:	Feature	7	3	0.57337	0.687994	0.01409	15	0	0	0
P20573				249.103	Sudan I, C.I. Solvent Yellow 14	C19525	Involved in pathways: Chemical carcinogenesis. More specifically: . Also associated with compound classes: Carcinogens, Group : Not classifiable as to its carcinogenicity to humans, Compounds, C Sudan I	Feature	7	3	0.589385	0.703791	0.021873	33	0	0	0
P28094				291.159	Tulipinolide	C09564	Involved in pathways: . More specifically: . Also associated with compound classes: Phytochemical compounds, Terpenoids, Sesquiterpenoids, Germacrenes, C Tulipinolide	Feature	7	3	0.541026	0.653239	0.007929	11	0	0	0
P31408				309.04	Kaempferol, 3,4',5,7-Tetrahydroxyflavone, 3,5,7-Trihydroxy-2-(4-hydroxyphenyl)-4H-1-benzopyran-4-one, 5,7,4'-Trihydroxyflavonol, C.I. 75640, Indigo yellow, Kaempherol, Kempferol, Nimbecetin, Pelargidenolon, Populnetin, Rhamnolutein, Rhamnolutin, Robigenin, Swartziol, Trifolitin	C05903	Involved in pathways: Flavonoid biosynthesis, Flavone and flavonol biosynthesis, Biosynthesis of phenylpropanoids, Metabolic pathways, Biosynthesis of secondary metabolites. More specifically: . Also associated with compound classes: Lipids, PK Polyketides, PK Flavonoids, PK Flavones and Flavonols, C Kaempferol, Phytochemical compounds, Flavonoids, Flavonols, Carcinogens, Group : Not classifiable…	Feature	7	3	0.576503	0.691153	0.013908	25	0	0	0
P39354				351.107	6-[2,3-Dihydroxy-1-(hydroxymethyl)propyl]-1,2-dihydro-7-hydroxy-9-methoxy-cyclopenta[c][1]benzopyran-3,4-dione	C19590	Involved in pathways: Metabolism of xenobiotics by cytochrome P450. More specifically: . Also associated with compound classes:	Feature	7	3	0.558201	0.672196	0.010232	17	0	0	0
P46200				387.139	Gibberellin A8, 2beta-Hydroxygibberellin 1	C03579	Involved in pathways: Diterpenoid biosynthesis. More specifically: . Also associated with compound classes: Lipids, PR Prenol lipids, PR Isoprenoids, PR C isoprenoids, PR Gibberellins, C Gibberellin A, Phytochemical compounds, Terpenoids, Diterpenoids, Gibberellins	Feature	7	3	0.524876	0.634281	0.00654	64	0	0	0
P52815				424.07	Gluconasturtiin, 2-Phenylethyl glucosinolate	C08417	Involved in pathways: Glucosinolate biosynthesis, Biosynthesis of secondary metabolites, 2-Oxocarboxylic acid metabolism. More specifically: . Also associated with compound classes: Phytochemical compounds, Amino acid related compounds, Glucosinolates, Glucosinolates derived from phenylalanine, C -Phenylethyl glucosinolate, Glycosides, S-glycosides, C Gluconasturtiin	Feature	7	3	0.57337	0.687994	0.013662	10	0	0	0
P57018				447.213	Licoricidin	C16986	Involved in pathways: . More specifically: . Also associated with compound classes: Lipids, PK Polyketides, PK Flavonoids, PK Isoflavans, C Licoricidin	Feature	7	3	0.558201	0.672196	0.010249	3	0	0	0
P63079				483.149	Catalposide	C09775	Involved in pathways: . More specifically: . Also associated with compound classes: Phytochemical compounds, Terpenoids, Monoterpenoids, Iridoids, C Catalposide, Glycosides, O-glycosides, Iridoid glycosides, Major components of natural products, Crude drugs, Catalpa fruit	Feature	7	3	0.535533	0.646919	0.00749	72	0	0	0
P63769				487.23	Testosterone glucuronide, Testosterone 17beta-(beta-D-glucuronide)	C11134	Involved in pathways: Steroid hormone biosynthesis. More specifically: . Also associated with compound classes: Lipids, ST Sterol lipids, ST Steroids, ST C steroids and derivatives, C Testosterone beta-, ST Steroid conjugates, ST Glucuronides, C Testosterone glucuronide	Feature	7	5	0.32263	0.347472	5e-06	65	0	0	0
P79308				597.303	Salannin	C08780	Involved in pathways: . More specifically: . Also associated with compound classes: Phytochemical compounds, Terpenoids, Triterpenoids, Limonoids, C Salannin	Feature	7	5	0.392193	0.430411	0.000254	38	0	0	0
P92382				743.254	Azadirachtinin, 3-Acetyl-1-tigloylazadirachtinin	C11047	Involved in pathways: . More specifically: . Also associated with compound classes: Lipids, PR Prenol lipids, PR Isoprenoids, PR C isoprenoids, PR Apotirucallane triterpenoids, C -Acetyl--tigloylazadirachtinin, Phytochemical compounds, Terpenoids, Triterpenoids, Limonoids, C Azadirachtinin	Feature	7	5	0.380866	0.425434	0.020072	65	0	0	0
K00455		3,4-dihydroxyphenylacetate 2,3-dioxygenase [EC:1.13.11.15]	hpcB				Degradation of aromatic compounds	FRD	7	4	0.488426	0.588468	0.007906	38	0	0	0.736842
K00611		ornithine carbamoyltransferase [EC:2.1.3.3]					Arginine biosynthesis	FRD	7	4	0.450855	0.529621	0.001199	17	0	0	0.486842
K00926		carbamate kinase [EC:2.7.2.2]					Arginine biosynthesis	FRD	7	4	0.470982	0.547393	0.018028	65	0	0	0.526316
K02567		periplasmic nitrate reductase NapA [EC:1.7.99.-]					Nitrogen cycle	FRD	7	4	0.504785	0.586888	0.012552	15	0	0	0.671053
K04100		protocatechuate 4,5-dioxygenase, alpha chain [EC:1.13.11.8]	ligA				Polycyclic aromatic hydrocarbon degradation	FRD	7	4	0.437759	0.515403	0.002622	65	0	0	0.447368
K04105		4-hydroxybenzoate-CoA ligase [EC:6.2.1.27 6.2.1.25]	hbaB				Degradation of aromatic compounds	FRD	7	6	0.276178	0.29218	0	65	0	0	0.013158
K06400		site-specific DNA recombinase						FRD	7	4	0.416996	0.481438	0.000346	37	0	0	0.315789
K06919		putative DNA primase/helicase						FRD	7	4	0.502381	0.583728	0.012206	61	0	0	0.657895
K07663		two-component system, OmpR family, catabolic regulation response regulator CreB					Two-component system	FRD	7	4	0.507212	0.588073	0.012318	78	0	0	0.671053
K08357		tetrathionate reductase subunit A					Two-component system	FRD	7	4	0.420319	0.491706	0.004731	38	0	0	0.368421
K09690		lipopolysaccharide transport system permease protein					ABC transporters	FRD	7	4	0.473094	0.568325	0.002463	50	0	0	0.657895
K12265		nitric oxide reductase FlRd-NAD(+) reductase [EC:1.18.1.-]						FRD	7	4	0.492991	0.578989	0.011493	19	0	0	0.657895
K14748		ethylbenzene dioxygenase subunit alpha [EC:1.14.12.-]					Degradation of aromatic compounds	FRD	7	4	0.354027	0.384676	4.9e-05	65	0	0	0.026316
K15511		benzoyl-CoA 2,3-epoxidase subunit A [EC:1.14.13.208]					Benzoate degradation	FRD	7	4	0.407336	0.460506	0.001088	6	0	0	0.223684
K15512		benzoyl-CoA 2,3-epoxidase subunit B [EC:1.14.13.208]					Benzoate degradation	FRD	7	4	0.439583	0.518562	0.003049	69	0	0	0.460526
K15513		benzoyl-CoA-dihydrodiol lyase [EC:4.1.2.44]					Benzoate degradation	FRD	7	4	0.437759	0.515403	0.00294	29	0	0	0.447368
K15514		3,4-dehydroadipyl-CoA semialdehyde dehydrogenase [EC:1.2.1.77]					Benzoate degradation	FRD	7	4	0.488426	0.586493	0.007089	73	0	0	0.723684
K18923		antitoxin StbD						FRD	7	4	0.466814	0.562796	0.005212	60	0	0	0.644737
K21393		TRAP-type transport system large permease protein						FRD	7	6	0.276178	0.29218	0	65	0	0	0.013158
K22310		L-ornithine Nalpha-acyltransferase [EC:2.3.2.30]						FRD	7	4	0.458696	0.546209	0.001781	58	0	0	0.565789
