# Supplementary material for: Secreted Rhizobacterial β-Glucosidase Unlocks Coumarin-Mediated Root Iron Uptake
Source: Research Square preprint supplement (doi:10.21203/rs.3.rs-5909771/v1), 2025-02-20
Supplement: Supplementary file 12 [file deaa336c6e1d200364f5c5cc.xlsx]

## Sheet: Sheet1
Supplemental Table 8. Peaktable of identified glycosylated metabolites based on the neutral loss analysis
	mz	mzmin	mzmax	rt	rtmin	rtmax	npeaks	X20240621_bac	S01_col_00h_01.mzdata	S01_col_00h_02.mzdata	S01_col_00h_03.mzdata	S01_col_02h_01.mzdata	S01_col_02h_02.mzdata	S01_col_02h_03.mzdata	S01_col_04h_01.mzdata	S01_col_04h_02.mzdata	S01_col_04h_03.mzdata	S01_col_08h_01.mzdata	S01_col_08h_02.mzdata	S01_col_08h_03.mzdata	S01_col_12h_01.mzdata	S01_col_12h_02.mzdata	S01_col_12h_03.mzdata	S01_col_24h_01.mzdata	S01_col_24h_02.mzdata	S01_col_24h_03.mzdata	S01_col_48h_1.mzdata	S01_col_48h_2.mzdata	S01_col_48h_3.mzdata	S02_cse_00h_01.mzdata	S02_cse_00h_02.mzdata	S02_cse_00h_03.mzdata	S02_cse_02h_01.mzdata	S02_cse_02h_02.mzdata	S02_cse_02h_03.mzdata	S02_cse_04h_01.mzdata	S02_cse_04h_02.mzdata	S02_cse_04h_03.mzdata	S02_cse_08h_01.mzdata	S02_cse_08h_02.mzdata	S02_cse_08h_03.mzdata	S02_cse_12h_01.mzdata	S02_cse_12h_02.mzdata	S02_cse_12h_03.mzdata	S02_cse_24h_01.mzdata	S02_cse_24h_02.mzdata	S02_cse_24h_03.mzdata	S02_cse_48h_1.mzdata	S02_cse_48h_2.mzdata
8682	343.067	343.066	343.068	134.891	128.328	136.629	44	42	79614.1	86807.8	91115.5	130267	123981	111186	178501	171077	187669	388403	403735	436971	237221	219563	224831	765093	662339	737135	273133	221117	279217	235757	249335	263617	289130	295952	318431	485811	517099	532714	732123	774116	783139	635148	591677	612714	980547	923430	857349	674870	682879
7031	306.098	306.096	306.099	232.693	231.364	233.801	23	23	4672.01	3267.14	3312.88	5477.98	2562.48	4184.54	2574.59	3092.01	6294.96	4638.66	5036.82	5026.96	8902.17	5894.87	10207	16507.9	16858.5	14951.5	17118.6	13709.7	15839.9	2512.48	680.041	3711.01	2894.8	2251.51	2908.26	3362.51	1690.08	3198.38	770.629	879.365	1682.12	16699.2	18779.3	18456.4	8387.76	7216.16	8312.71	13850.4	13553.1
16701	619.165	619.16	619.167	366.41	366.075	367.155	41	41	23980.2	19441.3	17283.9	19261.2	15581.9	18684.4	20377.1	17274.7	18069.7	17989.9	16766.6	17358.3	17214.8	20307.2	19298.6	20437.1	21307.6	20263.9	17344.9	18292.5	19534.1	13770.7	14656.2	14045.4	14585.7	14237.4	15932.7	13630.1	13902.2	13905.3	16526	15132.9	16376.2	18325.2	19107.4	18713.8	20951.3	21168.2	19897.6	24167.8	20979.1
14304	517.135	517.132	517.136	351.228	350.056	351.964	42	42	46376.1	46449.3	48087.9	51939.3	47815.7	53521	43360.2	44972	48734.3	44417.2	47146.4	49703.3	43573.1	44254.8	41519.7	65304.4	64420	66267.2	68068.1	64623.2	70433.4	61043.1	61778.6	66503.7	82261	77830.8	87120.7	91595.9	95877.1	97941.6	105874	111643	116291	124522	117737	121621	148280	147829	140094	199643	194062
12051	435.223	435.222	435.229	486.424	481.957	487.742	30	29	11773.7	10633	11041.3	11719.9	10025.7	10367.5	11814.2	13085.1	10343.6	12373.3	12858.4	12794.9	17200.5	18262.9	15885.5	11923.9	11798.6	14466.9	11255.1	20078.9	14980.6	7212.94	6049.99	7994.06	4186.36	3437.91	6780.77	4278.08	5137.94	4349.56	7067.47	8292.58	7442.88	9515.75	7061.28	6864.38	13125.2	8167.4	8233.2	13073.5	11434.3
12554	451.218	451.216	451.219	327.252	326.601	327.612	42	42	93172.1	93253.7	97025.6	104053	101968	102213	98147.9	108254	115176	121313	131969	140968	155894	145864	152094	181719	183700	194953	168934	163694	167727	68083.6	69333.6	76043.5	72052.2	79259.2	74875.4	65108.9	76097.3	83066.8	83360	86702.2	89800.4	102972	102790	102447	125478	120946	112116	157725	144116
13262	475.162	475.159	475.163	332.777	332.229	333.731	23	23	11218.7	9283.7	9862.56	12148.2	9840.97	9972.85	12156.8	10858.2	10556.1	13722	12154.1	13906.4	24231.3	21250.1	18282.3	24076.5	25770.2	24153.1	17886.4	18875.2	21346.2	7022.54	7899.66	9556.96	9318.61	8246.08	7411.72	9977.74	9872.4	9921.86	13469.7	14044.6	12689.1	18761	19127.1	17735.4	20829.2	22080.2	21850.6	27992.8	24450.1
15301	553.204	553.188	553.208	359.847	357.457	366.365	43	39	11995.9	12845.3	13483.9	8875.6	10207.2	10620.6	13354.2	13024.5	13145.8	20143.3	17447.9	19368.7	16748.4	18105.4	21749.3	24254.5	22652.3	18434.5	27436	20237.5	20192.1	11502.4	8121.41	9896.89	11919	9474.46	7989.26	12932	11284.3	9920.32	18688.4	15002	17330.7	11720.1	14674.1	14239.7	18901	15061.5	19688.6	24241.4	23546.7
20878	865.144	865.138	865.156	36.1979	32.8447	37.361	6	5	3161.35	731.079	2815.6	688.588	1474.52	1724.58	688.182	730.612	0	800.065	1623.14	2373.75	2409.19	2384.03	2565.51	8581.71	4065.95	5544.89	7178.34	8180.78	8581.32	807.82	0	680.584	0	1438.91	770.166	0	0	0	747.746	856.756	0	2450.83	3396.58	3161.66	4704.74	6131.28	6662.46	5510.01	6002.02
7166	309.17	309.168	309.172	385.024	384.169	386.784	7	7	0	0	853.372	777.645	860.63	1512.93	0	1418.24	2548.13	1652.29	818.401	1035.39	3857.8	3079.82	2406.48	5603.22	6344.97	4119.3	5290.06	5509.27	3605.38	0	702.182	1004.71	746.272	0	0	857.704	724.792	2444.92	1641.64	0	1550.08	1433.62	1521.18	1433.66	3958.01	3575.33	1598.21	2713.49	3595.79
9074	353.001	352.998	353.003	259.829	259.12	260.671	41	41	9746.2	8533.69	9244.49	10925.8	8637.75	9387.99	12184.7	10957	9862.33	13728.2	11878.8	14875.7	15416.9	15100	13566	25510.4	24007.7	26617.7	23947.4	24211.8	25513.6	5719.13	4743.75	6068.2	4314.24	6079.39	7494.3	5628.51	7023.71	7875.2	9210.31	9742.96	8427.01	10875.4	8116.52	10455.6	15887.1	14373.9	14733	19988.7	20220
10186	381.177	381.175	381.177	199.169	198.57	199.891	42	42	30867.8	28804	29223.3	32974.8	32944	34621.7	34837.8	32666.4	35699.4	41287.9	43061.7	52637.7	42589.4	37817.4	39985.6	67891.7	68533.7	71029.1	21640.4	21815.5	22413.2	20924.4	22314.5	21940.5	21053.7	22454	25083.3	26929.9	30259.6	31711.7	28908.5	29483.4	31643.3	30339.7	29178	30334.5	34886.8	34801.9	35032.8	32258.3	28191.5
10188	381.177	381.175	381.177	248.982	248.415	249.468	19	19	8474.73	6579.8	6601.95	5622	7566.75	9274.18	7269.21	6371.84	8136.61	9007.85	10654.8	13220.2	8617.48	10064.5	11402.9	20255.7	21637.3	22137.1	18852.3	18234.7	18780.4	2652.34	2279.79	3842.65	3273.55	2457.09	3346.93	3921.19	3825.81	7588.07	7613.06	6420.58	6310.88	7538.66	5773.13	5612.52	10954.6	13311.9	13455.1	13325.8	15065.6
10745	395.192	395.19	395.193	243.485	242.925	244.298	42	42	33339.4	26553	32134.6	35046.7	38193.2	42204.5	37399.2	38056.3	44280.6	61049.3	53675.9	54595.9	55736.1	51683	59034.4	86240	88050.3	81224.3	55950.6	57450.5	57241.9	22594.3	24434.9	25488.7	22263	27877.6	24261.9	33430	30093.7	33496.9	32557.2	33176.9	37785.8	39037.8	33979.5	33625.4	40953.5	48263.4	48045.8	52220.5	57421
11219	409.208	409.206	409.208	288.453	287.881	288.903	42	42	54989.5	58738.6	45703.2	62174.8	57232.5	62864.2	63371.6	56045.2	62844.8	65682.7	65255.3	84288.8	87712.7	86983.7	90829	98713.7	108373	112991	62004.5	67495.7	68712.5	25148.2	23428.2	26716.5	33350.1	37724.3	35768.8	34174.9	33774.2	32168.3	35214.6	36217.7	37600.1	44867.6	36763.4	45620	52250.7	41826.3	52210.6	49829.7	56998.9
11220	409.208	409.207	409.21	327.251	326.816	327.427	7	7	6939	7670.36	6555.02	8176.03	7593.21	7787.64	9078.24	6382.59	9472.14	11846.4	10080.4	11991.7	12904.1	14656.7	14882.2	16004	17587.4	18255.9	14176.5	14340.1	12752.1	3346.7	3320.33	3326.69	3584.67	3960.72	6092.19	4679.54	3844.44	4904.06	8478.07	7588.49	9933.16	10772.7	11368.2	8958.97	11421.3	14785.9	11353.5	14929.8	12478
11904	431.098	431.097	431.1	316.022	315.664	316.753	42	42	22666.1	22395.5	26358.3	78800.4	76285.4	81483.4	136798	132009	147549	227626	246341	253773	421402	420228	412449	695950	681431	702651	579370	571744	571692	8821.15	8582.5	11495.4	58517.7	59956.9	62932.9	102676	108228	109154	185459	191295	202196	329709	310337	327660	528394	511748	534166	595097	595162
12112	437.239	437.237	437.24	349.582	344.169	350.621	60	42	187063	212325	287443	190891	271839	290628	188882	280946	329451	320377	335752	248995	256099	234057	287380	392177	310123	399965	172935	376787	253929	115252	138890	148455	138161	179190	241651	140713	213576	161364	228403	170738	203478	178212	241663	158336	188154	229389	186769	262906	253346
12113	437.239	437.236	437.24	358.727	358.314	359.239	42	42	303686	304648	290527	263358	303710	321323	327541	312970	330100	320393	334739	368071	403478	394209	386026	411781	399011	431168	312380	298004	293461	210315	221306	250493	234164	234899	257600	203700	215848	238452	256497	257483	272524	275463	259192	262458	305838	271631	314079	336756	334848
12114	437.239	437.237	437.24	388.589	387.589	389.702	42	42	115457	82770.8	100659	120757	95518.2	112372	72765.4	92496.9	117982	129602	109789	120346	131991	129945	161769	146671	148635	197703	140136	128959	110680	82249.6	76861	89254.3	98967.7	90724.8	80569.3	56722.1	77896.7	87401.9	118617	96893	93859.9	107532	125070	109154	116044	128647	125409	120754	117933
12686	455.213	455.211	455.214	288.392	287.684	288.903	42	42	61334.2	59682.4	54674.9	68421.7	59815	61737.4	66579.9	66452.1	65849.3	79123.9	77046.7	82979.4	92238.9	90866.4	90311.3	102953	103595	110203	70446.5	64625.3	63821.7	29013.2	27161.2	29135.9	29847	34702.2	33454.7	31062.3	32177.5	32391	38004.8	39553.7	39834.5	42377	37806.8	43671.6	49934.1	48060	50039.5	56909.6	51678.8
12709	456.217	456.215	456.218	288.361	287.555	288.888	40	40	11615.8	10140.1	9472.36	12839.1	10193.2	10672.8	11212.2	10956.7	13379.3	13633.3	15225.3	15804.8	17926.1	18468.9	17103.5	20024.6	19564.4	20658.3	12835.1	12178.3	11222.4	3363.22	2442.41	4454.74	3877.38	4478.39	3338.68	4524.63	3364.85	4895.96	5665.58	7752.96	5581.82	6457.65	7162.54	5921.14	9457.03	8097.9	8513	9500.8	7676.57
13385	479.25	479.247	479.25	380.336	374.825	380.847	58	42	1.39898e+06	2.02818e+06	2.05336e+06	1.92932e+06	2.00818e+06	2.06046e+06	2.06283e+06	1.52933e+06	2.28987e+06	1.67444e+06	1.55021e+06	1.68157e+06	2.75382e+06	1.81095e+06	1.99404e+06	2.79118e+06	2.09146e+06	2.14977e+06	1.75194e+06	1.61976e+06	1.62503e+06	1.45984e+06	1.57908e+06	1.6536e+06	1.13185e+06	1.73154e+06	1.74166e+06	1.04373e+06	1.49579e+06	1.63646e+06	1.1722e+06	1.86705e+06	1.97555e+06	1.38831e+06	1.95575e+06	1.3814e+06	2.21709e+06	1.48523e+06	1.62568e+06	1.81588e+06	1.76096e+06
13387	479.25	479.248	479.25	401.493	401.11	402.4	18	18	62394	53468.9	61282.8	53118.4	47927.6	50109.6	60272.7	58267.9	52137.9	57313.4	50488.6	61255.6	61131.5	62059.4	67369.4	66874	66978.6	76194.6	50097.2	42200.9	36802	40439.8	33035.8	35277.5	36201.8	36971	38447.8	35107.9	31556.2	31284.6	36589	37327.5	37388.1	37267.4	38685.2	42378.4	41129	30582.4	46011.4	45031.3	41797.6
13763	495.208	495.206	495.21	297.673	296.609	298.703	24	24	4873.11	1744.86	2304.21	2284.54	4157.36	2214.21	2620.8	4177.7	2655.8	3099.49	5058.4	3622.51	6047.3	8076.53	7638.95	13179.7	9752.82	11765.5	12155.1	9459.09	9377.19	0	1613.23	1628.57	1443.97	2523.24	693.313	0	1638.64	2886.82	2376.29	4035.24	3682.66	3734.68	1857.75	3724.87	7481.02	6401.64	7874.07	9545.26	11052.4
13770	495.244	495.242	495.246	266.612	264.894	271.538	34	30	13473.9	4808.79	8641.15	14336.8	14065.9	14560.5	8651.78	13757.1	16988.5	16525.5	21221.9	26554.9	20530.6	23893.2	22092.7	31825.5	41160.7	35830.1	27598.3	25486.7	28294.3	7156.04	9536.52	12834	13629.6	9064.77	14827.5	11002.9	15502	18790.4	18521.7	20520.7	19350.4	20883.4	25185.3	23633.8	31387.6	32060.6	26201.6	32463.4	28367.8
14123	509.225	509.22	509.226	340.874	339.736	341.356	40	40	10702.8	7667	7648.7	8782.94	8401.77	8912.46	9685.49	10526.3	10241.2	12731.7	12947.8	11740.4	16192.9	13891.2	14429.3	16959.5	17044.4	16899.7	14002.1	13790.9	12835.4	6329.12	5158.44	6121.43	5749.11	7222.49	8497.25	5673.82	5252.81	7910.7	7535.54	7005.89	9004.55	8722.58	10676.7	8954.23	10687.7	12329.4	12964.9	14978.8	13467.5
14535	525.255	525.255	525.256	401.293	400.771	401.782	15	15	41158.2	39269.9	37150.4	43160.2	34026.1	34058	44995.4	35956.3	39296.3	41274.5	35452.6	37274.9	48611.3	41528.4	48184.2	47098.9	47952.8	48660.5	35007.8	28600	28344.1	29292.8	22187.9	27850.9	27181.3	25608.5	27640.4	17153.9	24661.2	25661.1	30077.2	27141.3	26827.1	27645.8	26496.1	31643	30850.7	24005.4	37094.8	30955.1	29793.1
16926	631.258	631.254	631.262	318.376	317.771	318.66	27	27	2383.42	2271.81	1647.4	4211.14	4654.43	4227.81	4760.18	4890.31	3549.04	4295.56	6296.88	6689.13	8234.6	6286.11	7187.78	8653.65	9304.46	8720.47	7281.47	2980.58	4137.12	1661.63	3266.08	3056.72	1566.92	3129.45	1721.99	2424.28	1604.53	2544.77	2139.68	2827	4631.36	4576.15	5176.89	4075.85	5427.21	6937.05	7326.21	9537.41	9091.66
18765	731.219	731.216	731.221	317.282	316.472	318.394	19	19	0	0	858.714	0	1747.96	3074.22	10827.8	15440.8	15115	21520.6	23333.8	26806.6	24107.2	26456.7	24440.6	40809.5	46629.7	40857.8	49724.6	51424.7	46845.2	0	0	1528.19	1510.28	2172.53	3370.7	9413.71	10506	13298.3	17565.7	18189.9	18965.9	20351.8	21656.4	20991.4	33754.5	31028.1	28110.8	49278.6	48646.3
8399	336.109	336.108	336.109	312.461	311.876	313.367	42	42	12434.2	11863.7	13847	15705.5	14957.9	15386.9	15202.9	15408.8	16930.9	25809.6	28340.2	28613	49071.1	49239.2	50809.2	64942.3	65956	64093.4	77855	72753.8	69885	15065.2	15880.6	18304.8	15526.8	17263.7	20074.1	18394.3	19184.4	18584.9	23206.3	27091	28927.9	37050.7	36852.6	38260.7	52444.9	51070.7	53561	77241.3	73714.2
13333	477.234	477.231	477.236	344.352	343.611	345.118	40	40	10395.4	9178.29	13300.2	12443.2	13534.7	13696.8	13868.4	14186.6	12722.1	13296	16929	21089	21615.1	20305.6	21754	21772	28909.6	29048.4	26062.6	24917.5	26262.9	8244.84	8923.25	11280.4	10823.5	10540.2	10147.7	8647.3	9221.19	10199.4	12039.7	13605.5	13216.7	15810.3	14168	14987	19914	15647.1	18831.1	22655.1	22467.6
14364	519.192	519.187	519.2	298.783	296.473	300.103	17	16	759.031	833.586	1435.28	796.809	701.309	2935.82	885.872	3069.14	1431.52	1659.98	2434.28	5430.73	3838.09	3355.49	5944.31	7281.91	5257.35	9241.09	7662.98	7819.33	6086.59	0	1450.39	0	903.007	691.751	734.784	745.316	723.825	3240.75	1497.89	1427.45	1464.37	5081.52	2242.56	2344.45	8161.38	7334.56	7135	6689.67	6865.74
14940	540.172	540.17	540.173	320.718	319.925	321.507	42	42	35811.7	34043.8	45167.7	45136.7	47770.1	49024.4	44323.2	44371.3	51012.5	52391.2	56107.9	56737.6	66082.9	64038.5	66577.2	78826.2	81632.3	82866.8	60530.5	61305.5	62677.9	33506.6	32174	36944.8	35603.8	35610.7	37606.6	33477.8	35745.7	37986.3	40062	43889.2	43444.3	46681.1	47984.2	50350.8	57109.5	54331.1	56221.5	61778.5	63774.2
16414	601.189	601.184	601.191	259.206	256.577	261.283	29	29	4572.39	4983.67	4626.67	2436.67	2590.68	4319.51	1509.7	3657.3	3556.24	5958.56	5601.15	7169.43	7073	8139.9	7106.2	13248.6	14619.7	13883.9	8016.26	4894.41	7457.92	3816.28	3044.22	3620.6	6485.64	4389.06	4009.87	4088.57	3440.1	4802.18	4594.97	2579.35	5070.21	9769.61	7700.41	7808.09	12346.6	9993.68	9725.29	9554.49	9158.93
6279	289.083	289.081	289.084	248.757	247.793	249.783	34	34	13483.7	9174.83	10184.6	10998.5	10821.5	8130.6	11778.9	11780.4	10539.5	15973.5	17277.7	16157.7	21310.1	20042.8	19447.8	27578	27357	28836.7	18795.3	20268.9	22834.3	8194.57	7694.73	8024.66	5997.39	7809.16	9838.76	8046.3	10407.3	11494.2	8406.77	9455.63	11409.2	12549	10177.7	11211.5	15162.3	16796.2	15171.4	17529.5	16130.2
12435	447.129	447.127	447.134	265.367	264.061	270.99	19	15	0	0	0	0	0	0	0	0	727.573	0	0	727.902	754.495	699.765	810.407	5722.51	6117.1	5894.61	10273.8	11428.2	12016.5	14494.9	18300.7	19304.5	15780.2	16972	15012.1	13531.6	24830.4	13249.4	21088.2	24926.6	24610.2	24688.3	29378.7	23598.8	50835.6	39748.5	40509.3	45410.8	44472.3
12995	465.234	465.23	465.235	354.061	353.708	354.679	39	39	30464.8	31950.7	31336.3	28525	27638	29906.8	32119.1	36003	28599.8	36847.4	33299.3	36932	41271.1	42213.3	43121.1	45656.6	45368.4	54474	46192.4	45596.3	43803.4	20343.5	24188.2	23396.5	27191.8	28131.5	22794.8	22515	23671.3	23209.5	26197	28604.8	30242.8	33509.6	32114.3	35819.7	35645.7	36487.1	36063.8	44072.7	45920.2
14796	535.146	535.144	535.147	303.402	302.095	304.221	27	27	9638.82	10430.9	12212.7	9897.47	12600.7	14933.7	11046	14610.8	11081.3	14828.7	17156.8	14986	18513.3	20025.4	17936.2	36366.4	30755.6	32491.9	34847.4	30415.1	30102.5	15288	16820.5	14363.7	15976.2	18759.6	19351.3	21422.1	29809.7	27377	25558.5	29796.5	29394.3	42328.5	34035.8	36027	46747.6	47257.9	48555.4	67994.5	63546.7
16109	586.176	586.174	586.178	321.119	320.444	321.788	41	41	12219	15449.1	14314.5	12986.7	13211.8	12291.7	14046.5	14192.7	14673.1	16628.5	16461.5	17363.7	19365.9	20040.2	18503	23547.1	22455.9	27802.7	21880.9	23007.9	20306.8	9927.98	9038.77	9187.64	9178.25	9938.56	9382.69	8712.68	8415.96	10171.3	11295.3	12235.4	11697.7	12957.2	13240.2	12913.6	18768.3	16179.6	21500.6	24078.8	21644
3755	215.094	215.093	215.095	241.556	240.268	242.669	5	5	4507.5	2488.55	3112.9	10786.1	9453.52	10417.9	9822.18	9262.72	10382	11713.2	13659.5	13510.7	13515.5	12440.6	12790	31926.6	28762.2	28190.8	29322.8	29415.7	30981.8	3207.64	831.428	4865.29	6792.25	8041.18	9863.66	7872	9595.85	13092.7	10313.9	7595.82	13906.2	22631.7	23952.8	19876.4	23494.3	38549.4	41123.4	26551.7	40129.8
13100	469.192	469.19	469.193	249.006	248.413	249.305	42	42	42167.2	37791.1	38222.5	46337.9	42496.1	42411.1	40458.4	42444	36254.9	58421.7	60177.6	59841.8	53891.3	54174.6	52478.1	106361	102175	108677	88720.2	86523.1	88171.1	26640	24296.7	25709.6	26635.2	26814.6	27629.6	33442.5	32304.1	33823.4	32752.5	33923.9	34506	40278.9	39387.5	40843.3	58561.3	61808.8	63752.7	74668.3	72145.9
15458	559.297	559.296	559.298	265.369	264.765	265.786	14	14	0	0	0	0	0	0	0	0	0	0	0	0	0	0	0	0	0	0	0	0	0	895.464	2260.61	3947.38	2821.57	0	0	2390.76	2977.92	4040.61	5798.6	8633.26	5939.95	9170.14	11055.7	11106.4	14717.5	14849.5	15327.8	11448.9	13689.4
16334	597.198	597.193	597.199	400.104	399.432	400.783	27	27	8236.89	11666	16083.2	6463.45	9408.34	13503	19146.2	26485.8	27241.5	38960.6	43609.3	39781.3	55938.5	50089.8	48762.8	57453.5	54707.5	63059.9	57397.9	48208	52134.5	6921.2	8159.96	9584.22	4133.06	5795.43	5067.76	9124.48	13728	14863.9	26886.5	29596.7	28655.9	34114.6	36089.8	35931.8	41507.4	42491.8	40417.5	49250.8	53490.5
8512	339.072	339.066	339.073	276.221	274.288	277.165	39	39	93218.9	79933.1	92221.6	11231	14440.7	14953.2	715.609	3419.68	1994.63	4634.72	7314.68	5147.08	7410.74	5173.21	4798.76	21890.7	23804.4	22157.4	46789.4	45643.4	43510.1	461664	463431	473491	177882	177952	182495	58892.6	63551.9	65259.4	26281.3	28380.4	27830.8	31762.4	32416.3	32030.3	79980.1	81108.2	79275.1	121367	115422
16539	609.145	609.141	609.147	229.957	224.005	234.544	34	32	30622	37212.3	42176.3	11402	13316.3	16545.1	37474.7	12738.4	15823.7	21812.1	12421.1	17518.6	11271.5	9579.27	12281	16687.4	16168.3	16374.1	3514.74	3922.14	4514.01	1.13208e+06	1.1468e+06	1.20736e+06	13413.3	16950.9	19711.3	10203.8	11085.1	13661.4	11132.8	13367.1	13751.1	11754.2	9965.95	12112.3	8708.44	5032.74	8371.15	0	749.231
4649	245.066	245.064	245.072	136.515	131.462	137.043	10	9	17959.5	18541.7	17125	0	0	0	0	0	0	0	0	0	0	0	0	9628.43	4171.03	6283.63	0	2447.35	1539.25	17813.1	19379.8	20605.3	0	0	0	0	0	0	0	0	0	704.92	0	2181.01	17432.1	16244.8	16998.1	12641.4	9183.81
8357	335.077	335.074	335.078	225.218	224.933	225.641	5	5	4297.53	5229.02	4347.57	5039.99	3213.3	3722.15	4209.15	5449.1	6274.43	7622.48	7655.86	9645.67	8800.93	9135.67	10219.3	14833.6	11239.2	3373.73	2991.69	4084.89	4007.31	136545	136814	140569	3914.08	3802.7	2879.94	6222.14	4317.38	9137.9	4073	5659.21	4836.41	5344.59	7531.11	6776.31	16517.7	14670.9	16639.1	8462.26	10073.8
15609	565.155	565.154	565.156	257.649	256.922	259.099	10	10	42142.5	48401.9	42997.8	27934.9	28523.8	26916.2	17455.1	17341	18589.1	0	0	0	0	0	0	4477.76	2345	4762.87	6873.91	3628.92	4422.14	44505	40478.7	37829	37970.9	38649.8	34680.6	3267.81	21972.3	4246.81	5483.85	5585.38	7414.89	6331.75	5973.5	5579.1	13121.2	14645.9	15123.2	26252	27449.7
6183	287.15	287.149	287.151	403.515	403.016	404.508	16	16	12219.3	11205.4	13066.4	9622.69	8931.72	13245.6	5925.67	4861.46	10137.4	2402.77	3289.59	7105.26	12507.3	10994.9	13646.7	8719.35	11830.6	11777.3	29370.5	26334	30360.5	24037	27029.4	26895.8	22652.9	23853.9	25856.4	7761.1	9858.73	11435.5	2322.83	4924.22	7296.16	9357.03	10561.5	11418.2	8914.03	11517.8	12838.9	29215.4	24676.8
10356	385.15	385.149	385.152	304.509	302.355	305.546	37	37	23554.5	21609.9	21926.7	22708.8	19765.1	22891.5	14988.1	13146.1	15490.9	17504.9	16461	16520.9	13572.8	15996.8	15884.2	18439.5	17276.5	21734.1	9547.69	9715.31	10477.5	16997.4	17556.8	19660.8	17840.4	16435.6	16269.6	11188	7888.17	11227	10500.6	12307.6	12454.6	12450	12481.5	12792.9	12278	14481.6	11632.2	11883.9	13929.7
4655	245.115	245.113	245.115	70.5901	70.0111	75.6787	6	5	53478.5	67026.7	73155.2	5672.23	6751.71	5706.44	9336.53	5303.09	8666.67	11616.4	13026.8	15480.8	4474.47	8378.39	8284.04	7930.78	6844.25	9511.65	0	0	0	71330.8	78145	102726	3052.71	4760.93	1757.85	9477.33	13336.4	13649.6	10107.8	14552.8	8935.04	14294.3	13814.8	15059.6	34627.9	37033.2	38256.2	33831.1	28810.6
9591	366.025	366.025	366.027	162.517	161.819	163.302	40	40	21005.1	21435.7	21367	28089.9	23288.7	24683.7	15384.4	17867.7	18910.6	19026.2	21471.7	22204	16588.3	14838.4	12603.6	12063.7	13372.4	14457.4	20023.9	19138.5	18953.6	23084.8	23215.4	22493.2	20508.7	21527.4	19913.6	13790.4	16506.2	14345.4	13739.5	15458.6	14489	16136.6	13317.8	12896.5	12487.9	11003.5	11223.6	15952	16763.7
11396	415.103	415.099	415.104	336.853	336.052	337.461	23	23	25140.1	24620.9	26139.4	11816.6	11130.7	12888.3	14769.8	15548	18506.4	0	767.287	0	0	0	0	692.764	723.175	0	2155.95	754.623	0	38656.4	44825	45792.1	30230.8	33878.4	36558.8	18769.4	20655.6	24812.4	12676.8	14200.1	16627.2	16358.2	16431.4	17221.6	17486.6	16339.3	16005.8	15814.2	16754.1
14363	519.186	519.184	519.187	266.215	265.889	267.174	9	9	35115.7	29730.8	28968.6	0	0	0	0	0	0	0	0	0	0	0	0	0	0	835.657	0	0	0	39743.3	38529.4	37511.8	14304.1	14375	15913.8	0	0	1870.66	0	0	0	0	0	1463.02	0	689.613	0	0	0
15556	563.176	563.172	563.177	365.829	365.309	366.265	6	6	0	0	0	0	0	0	0	0	0	0	0	0	0	0	0	0	0	0	3244.65	3337.25	2852.77	13329.2	13527.1	14870.4	7951.31	8344.03	9061.37	0	0	0	0	0	0	0	0	0	0	0	0	881.61	0
10354	385.114	385.112	385.115	210.931	209.556	211.296	7	7	43397.7	41415.9	44216.2	17502.7	16134.1	15984.5	10465.6	10563.7	12764.8	8938.6	10583.1	10524.2	2994.63	3260.77	2517.71	3735.59	7320.12	4596.25	4076.58	5401.26	4102.31	97071.1	94944.3	100456	25507.8	26613.2	29773.8	15217.9	14190.1	16842.3	6331.06	6071.82	9488	6700.84	4759.53	6774.83	0	0	0	0	0
10683	393.212	393.211	393.214	317.853	313.379	321.323	18	17	26542.9	25329.1	27593.5	15617.7	16799.7	20681.7	5059.91	3491.68	8080.56	13047.4	7854.47	12559	14703.1	13303.6	13486.4	3071.33	0	2963.08	0	0	0	18998.3	19506.9	23597.9	10357.7	12607.4	9318.79	4839.43	3001.01	5500.18	7138.16	7981.1	3526.25	7547.9	3384.04	8697.65	0	0	0	0	0
10797	397.077	397.076	397.078	166.075	165.171	167.842	5	5	3092.94	3130.44	4818.12	0	756.614	0	0	0	0	877.942	0	687.447	0	0	0	0	0	0	0	0	0	8168.31	9393.78	8457.11	4447.98	5348.88	7921.52	4815.13	8786.14	8866.37	737.754	3639.23	2899.78	704.813	0	1426.79	4809.53	9096.04	9754.1	4357.81	6116.19
20548	831.5	831.498	831.504	840.162	836.141	845.286	14	13	33578.4	759.797	916010	0	17526.9	822762	0	83873	335736	0	1.17064e+06	149560	73079	44387.3	31245.5	60237.1	38499.1	26975.3	916.761	7865.42	9043.09	0	3.951e+06	268054	0	1.70528e+06	148338	0	1.33687e+06	136283	1537.43	1.83378e+06	113821	52638.4	35982	29236.3	46222.7	30105.9	23410.4	3886.07	5827.12
4014	223.061	223.06	223.062	276.416	275.444	277.141	24	24	125321	133296	139556	20347.4	22561.8	26131.5	0	3244.56	6943.42	8372.25	12075.1	13785.1	4711.04	4209.49	3980.58	77268.1	84004.8	102312	113661	110127	113071	677688	740803	841637	270816	285717	306560	98655.8	105706	116652	53988.8	62604.8	65344.7	63825.7	64998.5	66616.9	175999	146344	141377	225283	241181
5238	261.134	261.134	261.135	288.541	287.781	289.218	42	42	70162.7	67868.6	72837	68305.7	65902.1	76393.8	19896.3	20853.1	25210	20420.8	20264.6	25727.8	29721.1	31022.3	30043.7	30152.5	31719.5	42733.7	73398	69662.8	66471.4	81566.3	87875.1	95952.4	92321.8	94096.3	106487	24756.7	22382.3	27677.2	20308.5	23985.2	26947.4	30440.8	34675.2	34506.2	30361.2	35903.8	38187	73405.5	71526.3
5875	279.038	279.018	279.04	69.2626	67.4994	71.3299	10	10	178468	200026	488751	18181.9	13009.9	15710.2	19453.9	17684	20931.7	20141.3	22092.8	20353.1	1386.53	2453.58	3947.33	3068.63	4890.32	9516.28	29428.4	27653.3	29235.9	288209	477496	701238	14069.9	18426.3	14099.7	21728.5	27676.7	18864.6	17391.8	21646.2	17372.5	9716.15	13620.9	12456.3	7006.33	8505.93	8380.08	6138.77	3432.77
5966	281.111	281.11	281.112	139.482	139.089	140.462	6	6	24203.1	18641.1	21519.3	0	0	0	0	0	0	0	0	0	0	0	0	798.574	0	0	768.336	737.771	739.351	21411.5	17913.4	23166.9	0	0	0	0	0	0	0	0	0	0	0	0	13968.8	13619.8	13951.1	14308.8	14634.4
6005	282.085	282.084	282.085	102.551	101.963	102.956	6	6	97856.2	81435.5	101152	0	0	0	0	0	0	0	0	0	0	0	0	11378.7	17524.3	17251.3	0	0	0	119181	134366	147094	0	0	0	0	0	0	0	0	0	787.284	1771.21	1460.8	14791.8	18650.1	21632.9	0	0
7170	309.207	309.206	309.208	617.827	617.458	618.948	13	13	1.36813e+07	1.27659e+07	1.26698e+07	27148.8	31084.2	30731.6	8081.54	8812.19	10911.6	2544.61	3114.62	4209.03	0	1517.73	762.212	3806.19	1463.58	2171.67	3782.73	3162.31	3149.26	1.35533e+07	1.27877e+07	1.34087e+07	26946.9	32727.4	26103.1	6959.34	10551.6	8318.13	4908.87	2173.44	5590.84	2129.46	2468.78	0	2335.52	2124.54	3677.95	5490.81	4117.47
15099	546.277	546.275	546.278	214.322	214.057	214.466	6	6	7311.57	7422.29	6867.18	0	0	0	0	0	0	0	0	0	0	0	0	0	0	0	0	0	0	6901.89	5758.3	7536.29	0	0	0	0	0	0	0	0	0	0	0	0	0	0	0	0	0
16413	601.153	601.149	601.156	270.218	269.327	271.565	31	31	4679.68	5179.61	0	4408.1	3917.88	1820.02	5241.6	4724.44	6166.4	5959.89	3727.27	6632.48	3818.35	7154.62	8207.36	3762.85	3229.56	4250.28	0	755.767	0	10538.9	10195.5	8038.67	7466.9	6289.51	6178.9	6408.61	3533.11	4807.58	7246.34	8198.64	6752.99	7117.4	6179.6	7109.5	5325.8	4307.94	5540.75	3552.84	4309.61
22208	982.991	982.989	982.996	46.1197	43.4229	51.4064	19	19	801288	548733	42970.2	965067	500852	41573.9	412516	165072	35511.9	1.01018e+06	102462	31443.7	31193.4	218593	26748.4	61849.8	48982.7	107835	111457	102415	89747.3	1.68218e+06	62037.5	22383	561900	50109.7	829093	707513	36497.8	352686	611376	34315.8	652768	256770	178669	195033	547867	317410	561920	371772	284667
10741	395.155	395.153	395.156	170.719	170.044	171.361	33	33	16048.9	17339.5	17246.7	17596	17044.6	17971.6	18527.2	16495	19171.7	21551.5	19659.9	22048.5	12735	11842.5	14681	13681.3	13880.6	15012.2	0	0	0	11983.9	13333.9	16462.5	14821.7	14031.4	17711.1	19195.5	19641.1	20170.7	15106.1	14424.1	16031.1	10703.5	11534.6	11937.4	3433.86	3870.82	5739.19	0	0
6868	302.065	302.063	302.065	345.131	344.307	346.335	41	41	51934.1	43289	40287.5	61139.1	44867.7	47579.3	50227.5	41789.3	50427.9	41072	40358.3	38864.7	31219.9	29403.6	27418.1	29608.1	25465.5	29074.1	12571.2	14026.5	13930	46873.5	46398.3	44685.3	50293.4	53314.2	45865.3	34634.2	56121	48528.6	42704.6	49406.8	32921	36268.8	27101.9	23120.1	30382.8	27070.7	22044.5	10231.9	10854.7
13139	471.004	471.001	471.006	136.726	133.348	137.95	10	10	3331.73	3165.4	5495.35	3097.78	3800.76	3059.48	3080.74	4176.1	4604.16	4298.77	6682.51	4874.04	2482.62	2353.61	1509.95	2524.89	1605.71	2201.56	0	808.897	0	3900.15	2587.1	7334.68	3200.7	4915.99	5221.8	3720.98	7535.98	9559.81	4524.93	5777.33	5181.54	2903.66	3444.64	3470.36	1820.07	725.82	909.902	677.093	0
7430	315.072	315.07	315.073	266.858	266.513	267.27	10	10	3133.88	1558.47	1798.64	2203.07	1609.86	2713.78	2298.09	4103.4	3744.12	1626.85	1136.57	2437.56	2336.15	2366.05	1683.46	0	0	0	0	0	681.316	1838.23	4842.25	4517.08	4052.88	4323.41	6590.55	2314.04	3913.36	6782.87	6421.69	4579.94	5392.65	1378.41	1635.9	1653.54	0	0	0	1449.54	0
6828	301.094	301.092	301.112	202.09	201.139	206.409	41	35	9593.41	11155.3	11370	10619.6	12617.9	12774.8	12173.7	9832.23	12214.4	10644.2	12787.3	7980.29	5492.83	7586.97	4862.08	8745.02	5555.47	8166.99	8534.14	3370.71	10275.3	13303.2	11871.3	11755.8	9829.41	13079.8	9043.05	13695.6	14738.9	13958.4	10920.1	13260.1	9366.69	8627.29	8404.15	8329.29	7303.53	6087.1	6909.98	3073.78	9446.88
3496	209.022	209.019	209.024	54.1517	52.9561	54.9592	32	31	20600.1	20982.2	15203	21577.3	20494	18585.4	10193.6	11599.1	12814.5	18645.6	18516	15020.4	18601.4	14778	12029.8	6948.9	8514.15	3784.83	14122.4	14302.6	12580.3	14662.1	12429.3	11280.9	16182.5	12956.6	14807.6	16688	12476.8	15840.9	13685.3	9802.36	16105.7	5299.98	8822.38	8796.37	8252.93	5718.46	4545.79	6505.76	4558.42
5560	271.931	271.93	271.932	143.476	142.613	145.446	42	42	311388	300360	333522	394786	337014	367008	258498	239567	282500	357701	382065	412723	332699	283252	281961	249119	307100	301100	225636	252803	246325	347318	381883	414059	361849	383941	328425	362747	419536	403900	304750	362252	336069	252125	235510	258797	78552	83722.6	70052.1	217159	202884
5640	273.928	273.928	273.929	143.493	142.613	145.869	42	42	178374	173844	197792	229194	195723	220029	142738	142059	176608	210119	235742	250728	202362	163112	163651	151014	174879	166277	135332	145036	146498	197349	234340	247593	206995	223560	197468	206512	246899	240607	180885	212183	198107	148698	136420	151593	44475.5	46801.5	40705.7	126823	124644
6408	291.943	291.94	291.945	123.197	121.774	124.252	6	6	12094.1	3834.3	12453	13509.5	12414.8	11958.7	10167.7	11649.2	10569.3	11332	10828.9	11304.2	16422.3	13670.3	17157.3	0	0	0	6930.4	9959.72	9728.85	10872.3	2855.6	4225.98	10488.4	9977	11390	8692.9	9602.28	11274.9	10245.4	11675.7	10658.8	0	0	0	0	0	0	7345.62	6468.33
8498	338.956	338.955	338.957	448.967	447.783	453.762	38	38	40098.6	46840.1	50433.8	49608.7	59130	41456.2	36695.6	46329.7	35682.7	52707.5	61866.6	51385.5	31362.5	31785.3	29527.4	26817.1	27841.3	28813.8	16008.9	21689.2	18498.1	47198.6	45006.7	33519.5	49915.9	41330.8	32417.1	54271.6	51444.8	35700.8	57123.4	51865.4	37283.6	28869.4	32693.8	31431.9	26805.2	25269.6	19064.3	10494.3	13207.4
18130	698.173	698.167	698.174	261.763	260.706	263.287	24	24	8456.32	6380.95	8261.82	5655.8	3582.83	5248.23	6316.11	5374.19	5445.22	5878.67	4409.17	5070.68	3908.4	2417.16	2441.83	704.255	808.204	816.782	0	0	0	7022.22	7980.34	9084.4	6724.98	6342.08	6898.57	5969.46	6461.54	6899.12	5630.26	6716.24	7191.82	2948.23	3228.47	3665.1	0	1527.5	1454.5	0	0
19395	763.167	763.161	763.172	215.701	215.127	216.49	40	40	19922.4	13634	14337.1	14067.7	13689.4	12182.7	14629.7	13161	13624.1	14867.2	13102.5	14279.8	12573.4	12323	11414.3	13899.8	11177.9	12140.6	4140.05	2788.88	3506.04	14412.7	13699.2	13245.3	14425.2	14679.1	11868	13094.2	13811	11841.1	16209.7	14459.1	12859	9414.94	8558.95	9439.8	11872.4	10229.4	8234.69	3798.33	4279.42
19521	771.199	771.193	771.2	215.839	215.455	216.608	35	35	21723.9	19348.6	19511.4	18808.9	20017.5	18970.5	21231.4	20770.7	21076.8	19956.7	18745.1	19552.8	18238.2	17097.7	16088.6	11856.2	15122.6	13652.6	0	0	0	46594.5	53605.7	56707.3	37448.4	39795.4	39710.7	43374.9	45246.7	44053.4	38899.3	39544.7	41491.6	32360.6	31741	36174.7	14127.5	11912	11647.5	0	0
9654	367.161	367.159	367.162	195.255	194.722	196.036	21	21	8172.18	10601	6819.78	9608.9	8977.46	9176.05	8585.25	10830.2	11217.3	8786.28	11622.3	10993	7666.56	8230.82	7468.2	10775.4	10397.4	8605.76	0	0	0	6837.49	5512.54	7032.6	4645.8	5364.81	5661.59	7364.3	7306.83	5270.07	6441.53	6908.34	7604.72	4236.69	5673.93	4118.03	4161.7	4732.51	4571.8	0	0
6903	303.072	303.053	303.073	126.955	122.357	132.063	40	38	744133	750387	778311	762110	767224	771822	856018	855533	897585	1.03148e+06	1.03438e+06	1.06453e+06	807172	796598	802844	23541.2	10861.3	22491.8	8377.39	8566.19	7243.23	408148	405144	434875	415783	415006	439822	516806	522893	551396	539612	546923	570635	98068.1	100481	191004	9728.46	6561.77	7925.5	10386.3	9244.31
6930	303.921	303.92	303.921	152.477	148.627	157.78	23	18	213977	211659	138112	300703	172354	149412	194209	193954	243566	129906	243256	287502	95337	92111.7	91269.1	76658.9	90463.6	91018.6	124479	148869	135525	342268	253692	329155	229481	271649	297236	439466	653666	357872	347971	438102	257345	144052	162395	171149	96363.4	94315.9	79279.3	66788.7	63639
6935	303.921	303.92	303.921	98.1476	96.5025	99.9695	6	6	276589	187545	225336	205118	176541	268016	210507	227492	312727	240278	253066	363649	122419	98028.9	105474	45017	49235.5	50168.5	22077.4	26201.7	23301	261784	336344	421846	243025	322207	241627	424182	429398	500808	247441	337887	289793	263560	124927	294474	17244.6	16118.9	14086.2	42065.2	45042.9
7008	305.918	305.917	305.918	119.246	118.336	120.253	10	10	330842	227201	197332	268145	205766	222589	225221	213653	306143	294385	241922	294597	114912	111847	119674	5356.03	4660.18	3741.59	27319.5	30257.7	29792.4	338805	335470	400274	373966	313498	305097	436640	496702	535982	311271	342450	380541	9547.97	9466.41	12789.6	0	0	0	25321.6	25873.4
7690	322.093	322.091	322.094	230.357	229.876	230.808	28	28	46502.5	45008.9	45271.4	47161.4	43185.4	45218	42803.8	40486.6	45824.5	21892.9	21123	22576.2	8402.28	8136.24	8915.58	0	0	0	1697.76	1485.98	1493.97	30218.1	29142.8	30531.6	28527.1	28797	29213.5	25736.6	25403.5	26734.4	16859	16991.1	19039.4	6851.82	9389.76	11354.1	0	0	0	828.084	0
9417	361.15	361.148	361.151	270.917	270.046	272.286	21	21	6411.58	5221.69	8323.2	9059.48	8280.84	6034.3	5683.42	4941.59	5835.08	7612.98	7374.06	8576.35	4725.57	3267.07	2513.25	0	0	714.7	2117.34	1643.62	1540.7	4551.21	6863.48	6837.05	1505.02	2766.77	6324.21	2417.06	4273.16	5262.83	2568.25	4801.32	5186.17	4000.68	3896.68	3786.2	0	0	836.181	3901.91	2619.15
11192	409.057	409.055	409.059	136.078	135.315	137.506	28	28	29045.3	14898.1	14864.6	21072.1	19591.7	12518.9	21738.3	13233.6	16921.9	22057.7	17690.7	18507.8	3101.12	5375.11	1501.58	1434.43	3039.43	769.403	0	0	0	21059.4	18071.8	17675	20718.3	18732.6	13152	22399	25660.3	18195.6	17682.3	15974.1	13491.6	6527.88	7191.83	4788.77	1435.43	0	741.113	0	0
12428	447.093	447.09	447.095	252.281	251.835	253.666	16	16	12400.9	4879.79	2078.25	11772	3894.85	775.371	37575.9	22309.5	14860.2	33201.5	19344.9	10975.8	4185.25	3299.19	4131.53	0	0	0	777.831	0	0	6626.69	4978.31	949.59	8330.89	5409.37	3033.71	35453.4	28558.7	21376.7	45369.9	32185.3	19523.6	4736.25	3237.39	4311.11	8545.71	4780.09	8964.26	15801.6	14070.2
12466	448.097	448.095	448.098	251.985	251.807	252.912	5	5	0	0	0	0	0	0	5919.25	1578.73	0	7831.76	790.72	0	0	0	0	0	0	0	0	0	0	0	0	0	0	0	0	6364.86	2208.76	743.075	8706.05	4751.83	0	0	0	0	0	0	0	0	0
13692	492.75	492.747	492.756	32.2655	31.3687	35.1865	24	24	43335	48121	56112.8	46052.2	63111	66014.2	52844	55349.4	53537.2	62177.5	64859	60392.8	138197	71058.5	65541.8	43313.5	46916.9	48787.3	44702.7	46234.7	43036.7	62980.8	49711.8	52371.3	61431.8	50234.8	57922.2	63543.2	58375.3	56327.5	60464	61212.2	50551	64677.9	55906	45642.4	44670.6	48243.1	47819.2	52713.9	53653.7
14298	517.074	517.072	517.076	177.397	176.576	178.028	6	6	5399.12	2246.86	1557.42	3064.3	1581.65	0	3814.16	0	0	749.806	0	702.82	831.417	0	0	0	0	0	0	0	0	5091.77	2363.29	1520.86	1576.58	4529.61	1777.83	2648.79	3898.41	2631.47	3220.77	2282.15	1582.46	2233.49	710.997	685.086	0	0	0	905.224	1038.56
14856	537.197	537.193	537.199	189.837	189.104	190.471	26	26	21327.1	15518.4	16477.6	17171.4	14124.4	18282.7	16713.1	14622.1	15959.9	12285.1	10286.3	11725.8	5923.53	6821.01	2963.52	1506.96	0	1606.72	0	0	0	11413.8	10430.3	11119.2	13463.7	12904.5	12792.2	13505.2	10801.4	12933.1	8563.57	7978.31	10433.7	2277.33	3136.72	4603.9	709.053	0	0	0	0
15716	569.123	569.12	569.125	117.553	116.222	118.234	29	29	7459.25	8709.03	14152.4	10678.8	14583	18196.8	25192.3	36326.2	41337.5	30003.3	44786.4	61555	5634.5	7911.31	8248.01	684.046	0	0	0	0	0	9440.04	13321.7	17361.3	13870.4	18424.6	23433.2	46512	65763	84768.9	40611.7	55351	73377.8	7461.98	8111.48	9184.49	0	0	0	0	0
18498	717.276	717.271	717.278	270.186	269.437	270.99	36	36	111984	107155	120546	120152	102485	106370	108970	118688	121146	85995.1	90325.2	92636.1	68803	67479.4	63374.4	54282.1	49718.4	46063.1	0	0	0	79063.5	80052.5	78870.2	66781.4	81296.7	77496.4	66450.7	73419.2	73399.5	55313	57392.1	71071.5	60755.9	51992.9	58999.8	41169	41554.1	41228.5	0	697.593
8763	345.083	345.081	345.084	118.781	114.148	120.264	22	21	4233.13	3135.15	1678.54	2337.38	1633	926.729	4587.47	1766.57	3576.69	6845.08	7147.17	4100.53	4727.8	3974.4	2378.52	715.662	745.007	2470.74	0	0	0	24504.9	24670.2	26312.1	30137.5	29245.1	28137.6	38867.4	37685.7	34170.8	40285.6	38105.2	35524.1	22501.2	24039.4	14402.6	0	0	0	2303.92	4174.54
9876	373.077	373.075	373.079	166.43	164.405	167.721	25	25	6889.08	5708.42	4513	3919.97	5682.62	5144.67	6869.94	5327.88	7354.99	8013.59	8041.39	8662.31	5739.48	5080.08	5584.47	4510.89	4491.54	6165.69	856.5	1844.09	1964.75	5354.14	4290.01	6052.78	4011.79	5888.23	8204.6	5476.55	9208.48	9747.35	5419.48	5183.38	7462.9	4997.69	4603.01	5401.68	4195.97	5084.76	5225.21	2966.53	3356.11
10441	387.097	387.092	387.114	184.491	182.47	187.473	30	27	107025	117088	124411	77553.1	69420.2	127208	68425.8	75418.7	89209.9	6789.77	9140.39	7855.01	12887.6	13094	9267.97	60029.7	50328.1	59714	71245.8	71821	66753.5	29699	28714.5	28052.5	26567.9	28255.3	26820.6	35592.8	32790.7	35671.7	37496.7	37351.7	36662.8	25842.1	29484.8	30295.5	23910.8	22740.5	30102.3	8583.69	38670.6
11054	404.106	404.103	404.109	36.9012	36.2998	37.918	26	26	32471.6	23708.7	45946.6	26818.4	38031	35526.7	18886	26417.8	33513.8	9644.81	8045.22	12961.2	0	0	0	0	0	0	0	760.695	0	19079.4	26509.4	20249.9	21224.1	20049.6	24933.1	13983	18884.5	17431.2	15314	9690.12	18480.2	6802.54	6571.24	7730.54	0	0	0	0	0
11529	418.955	418.953	418.958	136.046	135.092	137.439	18	18	11275.1	8534.35	9174.35	11339.8	7551.79	9357.59	7348.71	8535.06	5585.79	10852.8	7387	12762.6	2406.33	4137.54	1719.91	1495.7	0	1452.65	0	0	0	10599.6	10202.6	10983.7	9232.6	5428.05	9818.43	10327.3	14248	12989.2	9406.53	10809.7	8088.19	3444.5	3032.89	3914.7	0	0	0	0	0
11923	431.192	431.189	431.194	220.469	219.922	221.072	37	37	77926.7	75885.4	76198	86159.6	86040.6	88857.3	85419	87114.4	86229.3	83109.3	81153	86421.5	43155.3	41338.1	38405	29401.5	32160	31637.6	0	0	0	55978	55545.5	59249.2	57074	60388.6	61175.3	71480.9	72291.1	72748.5	56106.8	57662.8	60050.9	43417.2	43172.2	46639.4	27853.2	27389.9	27628	2625.82	3603.29
12825	459.919	459.917	459.922	118.929	118.289	119.738	26	26	12987.3	8172.35	5547.92	8344.17	4321.92	7112.46	9706.12	4841.28	8135.19	11901.3	10502.9	17672.9	8280.33	7511.34	8385.99	0	0	0	1449.7	701.76	0	50770.4	53108.4	62095.8	52421.3	51277.5	54036.4	84973.5	96593.6	90933.7	66948.8	69707.5	69970.3	0	0	0	0	0	0	9969.72	7252.07
3377	207.052	207.049	207.054	41.0191	38.0196	41.9485	24	24	12890.6	6178.11	9854.32	12469.2	12031.9	10598.9	11276.8	12143.3	5868.53	12390.6	11581.9	9952	0	0	0	18888.5	11614.1	10911.2	28126.2	13785	28377.9	6282.41	6393.11	6991.78	9499.94	8052.25	9017.5	11736.6	12982.3	9890.25	14417.6	9877.19	9447.28	4225.56	4330.54	4398.82	0	1014.26	0	0	694.035
6113	285.062	285.049	285.062	169.31	164.679	170.482	39	39	364765	336339	358974	326579	339590	364166	378262	362516	403377	397147	386682	419706	179958	160530	177660	25568.9	26721.9	22501.6	5504.44	6581.95	7017.79	299393	299964	307844	296477	306016	308595	360329	361338	388146	305123	317482	330046	184506	181614	194566	862.809	0	760.885	11183.6	14756.7
6536	295.046	295.042	295.048	221.898	220.928	222.508	9	9	22660.6	17432.7	20138.4	21925.2	18666.6	15308.4	26099.9	19700.9	22486.3	24407.1	19529.5	19165.2	7557.04	4517.12	5703.83	4391.73	2833.42	4748.52	4559.58	6515.27	5624.71	24508.5	22998.3	21865.1	24816.3	23428.7	20918.4	27291.4	26918	21580.1	23188.3	22962	21046.1	9104.63	5819.47	9772.98	3739.01	5400.53	4724.16	6579.76	8110.62
10871	399.151	399.149	399.152	119.71	118.213	121.054	20	20	7733.23	3372.99	7087.62	5770.06	7134.96	6488	5655.28	7393.61	4803.35	5433.26	7245.19	7054.63	4690.93	1732.68	2626.37	0	720.48	0	0	0	0	2363.07	3453.37	3198.08	4320.96	4623.42	4650.9	3224.02	3831.54	7405.23	4192.02	2784.71	3048.24	1147.14	0	0	0	0	0	0	0
11212	409.145	409.143	409.145	523.511	522.85	524.446	42	42	116379	78341.8	66983.7	100212	66806.2	58809.1	82194.8	63249.8	63220.1	80476.1	60112.1	58282.2	47617.8	55308.6	51971.4	57674.7	59711.5	46377.5	17999.7	19036.6	16365.6	77162.2	59922.4	57280.2	87602.2	71870.7	61246.3	55216.8	44648.8	37092.4	76151.5	65339.3	55790.5	55383.2	48601	47876.1	55872.4	50641.3	46819.4	21610.8	23626.3
11864	429.934	429.932	429.937	126.952	125.764	128.276	19	19	11268.4	7976.65	10003.5	7752.49	5358.43	6625.59	8212.51	6406.83	10200.8	11257.6	16561.8	18666.8	11283.8	12255	10733.5	0	0	0	0	0	0	1586.81	4163.71	4944.8	2310.83	3241.84	1539.63	7811.63	7138.53	9832.54	5519.5	4263.81	6862.72	0	0	0	0	0	0	0	0
20632	838.129	838.121	838.131	215.71	215.395	216.796	42	42	17266.3	15851.1	17709.7	16883.9	14584.9	17144.4	16066.8	18082.1	17033.5	16543	18757.6	17944.6	19719.4	18297.1	15605.8	17464.6	15843.6	12349.6	11136.9	9743.66	10901.8	13509.6	14915.7	15066.9	15097.8	15458.8	17324.1	15102.4	14616.7	15097.6	15715.5	16782.2	17999.2	12968.9	13961.5	11825.3	13837.8	13492.7	11616.7	15432.5	10510.9
13070	468.127	468.126	468.128	161.854	161.472	162.258	6	6	0	0	0	0	0	0	0	0	0	0	0	0	0	0	0	12357.2	9411.25	13026.5	0	0	0	0	0	0	0	0	0	0	0	0	0	0	0	916.63	1618.06	3342.64	16023.8	12094.1	14283.8	0	0
14515	525.002	525.001	525.003	121.402	117.601	123.442	7	6	0	0	0	0	0	0	0	0	0	0	0	0	0	0	0	230575	109285	130733	0	0	0	0	0	0	0	0	0	0	0	0	0	0	0	458819	296570	168611	183314	180360	170365	0	0
12427	447.093	447.093	447.095	319.321	318.379	319.902	17	17	0	0	0	0	0	0	0	0	0	6510.9	4206.77	5863.95	9590.13	12096.4	8520.18	27065.9	26886.2	30049.5	795.46	0	0	0	0	0	0	0	0	0	0	0	3345.06	2218.85	3908	8846.01	8752.73	9073.09	64241.3	68332.3	74849.6	5544.31	5503.06
16237	593.151	593.15	593.151	216.108	215.615	216.796	15	15	35151.5	34773.5	35255.9	30427.2	28052	33844	32728.3	34557	35153.7	34983.4	34196	35611.4	36181.9	33231.3	35800.1	40463.6	38606.4	39963.3	22043.7	23464.1	25985	31921.6	32942.9	34973.5	29741.2	33360.1	33980.3	29278.1	37290	36074.4	35715.8	33717.9	34943.3	32640.8	30011	30785.8	37789.6	35707.5	36633.8	33876.3	32159.3
11944	432.122	432.113	432.124	189.785	189.084	196.586	17	16	6323.11	709.413	2733.41	4893.25	2897.38	4807.86	3615.3	4895.76	3712.76	6541.24	5276.44	3944.25	3926.9	3521.11	3491.4	4995.69	3095.54	3509.68	0	0	0	3221.71	3504	823.694	2636.67	3179.1	4310.92	5824.39	5838.42	4784.77	5055.82	2724.48	4653.33	1839.09	5003.71	2971.09	4972.87	3567.56	5394.52	3906.25	4028.46
8932	349.187	349.185	349.187	266.588	265.061	267.483	40	36	22812.5	19092.5	26888.3	21561.7	29266.2	38330.6	27126.4	28469.5	66782.6	35011.1	32984.7	41135.9	29038.9	24811.6	30812.8	53375.2	50510	45941	47584.1	36625.5	34909.2	19409.2	24767.6	28678.6	28096.4	68887	31027.9	16679.3	37243.1	31152.6	25567.8	23580.7	37530.5	30088.8	31005.5	32862.9	36048.2	36606.9	43020.9	34877.5	31447.2
10748	395.192	395.191	395.193	283.596	282.569	288.884	16	16	34426.7	33292.6	38396.5	41969.1	45226.2	46035.8	46748.6	47264.1	49290.3	55767.4	61976	64367.8	58448.9	58176.5	60741.1	78590	66791.4	78094.9	27163.5	21047.1	38323.8	35369.7	40536.8	46554.6	47743.9	45997.5	44906.1	40507	49574	62234.6	39602.2	53065.5	54982.9	55930.4	55343.8	59430.4	60897.5	63257	61671.6	41263.9	28848.9
5550	271.155	271.155	271.155	302.642	302.145	303.67	6	6	7550.89	4225.29	9809.93	15085.1	13326.9	15088.5	15998.8	13732.4	18000	16351.2	16570.7	19143	20853.6	18223.6	20678.8	20439.7	21334.2	22098.1	11536	13557.9	11294.2	3040.45	2977.97	4717.72	8817.81	8595.63	6867.64	11958.1	11286.7	13119.1	9984.01	11470	11597.8	13691	15427.7	17940.9	15989.7	14518.2	14508	12324.8	12219.4
9101	353.145	353.144	353.147	119.628	118.641	120.822	18	18	2955.68	4092.83	6624.77	7104.86	3792.36	3808.29	3783.39	4938.37	5587.28	9112.84	9299.1	8994.26	0	1570.71	1499.98	229643	270906	266041	0	0	0	1735.03	4053.32	4445.2	3781.42	4266.54	4852.81	4474.49	3630.06	6108.79	4755.6	3303.17	4534.09	1.10461e+06	1.0779e+06	1.11742e+06	1.63379e+06	1.62287e+06	1.72236e+06	0	0
13046	467.152	467.149	467.156	256.336	255.349	256.804	29	29	2293.54	4439.92	3563.32	4160.75	4161.96	5645.59	5385.58	5502.57	6548.08	6532.54	10105	10161.5	8533.99	8377.84	7826.88	12576.6	14359.4	12940.9	0	723.492	0	2579.85	4225.42	3380.5	680.334	1802.07	2651.61	3855.11	6273.55	6072.06	3309.23	6381.48	7556.59	8384.93	5111.27	6064.69	5974.84	6260.32	4920.48	3945.4	4330.39
17005	636.132	636.13	636.135	390.18	387.545	394.928	9	9	6940.9	5519.34	8478.82	2554.02	1954.59	3509.12	810.881	1621.22	3409.58	2233.98	1756.43	2328.16	6146.44	6167.53	2280.96	8534.28	6342.96	5380.22	0	2999.68	0	0	0	0	0	0	0	0	0	0	0	749.013	819.983	713.568	0	0	1407.98	717.881	0	0	0
7427	315.051	315.05	315.053	418.659	417.978	419.847	14	14	1899.82	0	0	0	0	0	0	0	0	8658.22	7610.35	9021.24	4291.06	6562.51	6619.51	7227.08	4354.94	5221.31	0	0	0	0	0	0	0	0	11620.3	0	0	0	5476.8	7688.73	5565.58	18704	20314.4	24825.3	37274.1	38185.4	42487.3	0	711.931
10339	385.078	385.076	385.079	152.032	150.913	152.993	30	30	9128.58	11465.2	11330.2	8026.99	9232.19	9753.76	10161.2	11710.4	12891.7	14355.8	16815.1	15091.2	13973.8	11115.9	11431.8	6620.42	5915.54	4949.06	0	0	0	9526.27	9387.35	9289.1	8339.89	8796.3	9120.1	11919.1	15614.1	15632.8	14017.8	14841.9	16134.1	12111	11605.2	12602	20283.4	17419.3	20575.8	10128.3	7570.86
11984	433.112	433.111	433.113	337.003	336.08	338.892	5	5	3200.01	725.987	776.472	0	0	0	732.964	686.069	0	6671.37	6393.01	6096.59	3586.15	6050.21	6850.07	9908.74	10100.3	12457.2	697.156	0	0	5624.64	4411.86	4297.67	3463.19	2485.32	2336.76	3285.47	1441.52	2390.15	3905.18	5021.84	2540.12	62383.7	26961.1	32178.9	45086.9	47393.5	44068.8	4307.71	2255.93
12667	455.094	455.08	455.102	40.8468	36.2998	46.4465	33	29	13834	3760.84	11105.5	11388.8	13476.7	11430.9	5632.43	8677.88	8120.82	4887.9	3927.2	4798.64	9546.77	50767.4	54003.1	443399	399612	513396	14592.4	9778.21	10792.3	7988.8	8539.28	7763.67	6605.99	5435.43	9425.76	14703.3	16575.3	10136	6297.58	14246.3	16124.4	4.80633e+06	4.55325e+06	4.70328e+06	4.71218e+06	4.6378e+06	4.36082e+06	4419.48	2464.95
14198	513.209	513.206	513.21	234.764	233.918	235.124	12	12	4062	3792.83	3359.19	5228.58	3602.4	2937.39	1586.99	4064.94	3484.5	4077.92	2382.34	4059.62	0	683.349	767.333	6973.62	8349.01	8871.52	0	0	0	2395.91	1671.72	5104.3	691.63	4266.48	3986.27	3941.01	4968.41	5166.72	1402.62	2144.14	3444.48	2958.55	2379.9	2713.88	13733.6	10459.5	15193.2	0	0
16583	611.197	611.195	611.198	249.496	248.766	249.732	7	7	751.935	0	724.966	1422.3	0	0	754.726	0	713.836	2464.9	1837.85	4049.62	1492.65	1573.7	3207.54	10388.8	8520.53	7936.84	0	0	0	0	0	0	0	0	0	0	689.625	2362.48	0	0	1018.1	0	1663.42	684.507	5140.39	4275.02	6031.72	0	0
16829	625.267	625.265	625.268	472.298	471.649	473.831	9	9	777.418	0	0	0	0	0	0	0	0	0	0	0	9785.01	7423.93	7986.36	9343.25	7158.71	8021.39	0	0	0	0	0	0	0	0	0	0	0	0	0	0	0	1620.68	1930.59	3142.98	4344.42	3615.86	5224.41	0	0
17053	639.193	639.192	639.194	220.468	220.353	221.029	8	8	3188.05	0	0	1622.97	0	0	1542.76	1432.06	791.858	4560.52	2542.66	2620.17	3589.97	4055.81	3205.14	12322.2	12340	13595.9	0	677.734	1482.1	0	0	714.891	0	749.611	0	0	2263.24	816.809	729.812	2627.74	2505.38	2510.74	2242.08	3112.06	8397.61	8546.49	7593.92	0	711.395
17577	669.203	669.198	669.204	214.47	213.735	215.036	40	40	13881.6	13222.7	14149.2	12445.9	15117.9	14031.3	14181	14521.9	17813.8	17997.2	19693.8	22119.5	21507.4	19978.6	18640.3	44202.8	42030.3	45109.7	14163.1	13051.3	13774.3	5420.03	5293.45	7298.59	7417.8	8102.81	4619.79	5589.05	7559.62	8771.58	7803.46	8603.76	8287.87	8986.26	8049.36	9808.48	15887.5	16174.4	17609.2	3650.43	6034.43
18729	729.239	729.236	729.243	285.103	284.324	285.599	32	32	6908.19	6755.27	3581.15	4781.85	7301.25	5921.88	8299.7	8324.57	8506.6	10990.6	10087.7	11209.5	13663.1	13685.2	14245.1	15319.1	17703.8	17161	706.078	2311.4	718.761	3417.48	1946.35	3284.95	3779.87	3399.14	3511.01	3436.4	5282.15	3375.69	7182.34	5554.12	8410.21	9806.74	8264.94	10710.1	9426.57	10001.6	10060.7	2892.99	1464.19
19143	747.25	747.246	747.252	230.737	229.333	231.911	21	21	1563.74	3176.79	1518.52	1408.84	3067.75	1613.34	3305.46	3745.39	3870.24	7524.97	6822.37	6223.35	8953.44	9729.75	7841.6	16096.6	11748.6	16603.3	686.195	876.052	771.503	1099.67	3892.25	1415.27	2177.9	4236.1	3221.01	3472.92	3669.06	4975.39	4566.66	8287.94	6120.22	6873.71	7494.6	7762.09	11329.3	10913.8	9723.04	698.929	857.564
21004	879.328	879.314	879.331	230.45	229.745	235.877	21	20	5197.66	3004.75	5350.3	6253.4	5168.81	3946.18	5315.4	2830.64	4492.85	7402.21	8492.25	8432.35	10110.2	9909.38	8741.25	11689.4	15210.6	16503.7	0	0	0	0	0	804.87	0	741.917	3228.23	1493.48	2289.58	1451.63	3914.55	3084.26	3638.3	4048.1	3028.86	3922.58	63743.5	59980	59430.2	0	0
22434	1019.3	1019.29	1019.31	247.025	246.521	247.577	17	17	5875.38	3480.77	6784.74	5078.32	4368.76	4966.61	6870.14	5820.39	6023.76	9331.65	9093.15	9098.38	10279.3	10535.4	9573.38	14816.8	13916.5	15213.8	0	0	0	0	0	0	0	0	0	0	0	0	0	0	0	0	0	0	1454.94	920.755	2262.58	0	0
10899	400.097	400.094	400.098	193.322	192.549	194.002	17	17	13130.9	9793.75	10235.9	11314.8	12962.2	10731.6	5620.81	7190.21	8013.44	0	0	0	4835.55	4104.71	3881.59	21219.3	23494.6	19693.9	2223.21	1732.34	1941.99	8839.87	7277.86	10150.7	8761.59	9031.58	9794.37	6674.95	4929.37	7166.15	0	0	0	4697.93	3750.28	3713.95	142318	123525	146104	7259.21	8919.55
16702	619.164	619.158	619.164	215.212	214.321	216.108	36	36	13739.9	9638.64	12125.7	10632.7	11936.5	11316	14466.7	10467.1	12189	16707	13926.9	19196.1	15132.4	19067.6	17367.6	33017	34207.8	35196.8	1402.62	3115.62	2372.93	9245.99	9423.19	11915.6	12648.7	10708.6	12332.7	14446.3	12636.6	12966.1	14953.2	14955.1	14641.4	20162.6	17193.7	16533	26272.1	28210.7	26450.1	3199.01	3081.76
17048	639.126	639.125	639.127	130.449	128.242	130.86	5	5	0	0	0	0	0	0	0	0	0	0	0	0	0	0	0	11962.6	11069.5	5827.11	0	0	0	0	0	0	0	0	0	0	0	0	0	0	0	1767.86	1556.64	1711.94	10775.7	11321	12320.8	0	0
17962	689.004	689	689.007	42.0075	41.5868	42.2181	6	6	0	0	0	0	0	0	0	0	0	0	0	0	0	0	0	0	1023.36	0	0	0	0	0	0	0	0	0	0	0	0	0	0	0	0	23524.8	24896.8	24449.3	31991.3	29860.1	27899.2	0	0
3786	216.088	216.087	216.09	181.717	181.211	182.938	10	10	0	0	0	0	0	0	0	0	0	0	0	0	6777	8042.12	7638.61	31563.8	32716.7	34663.8	4765.07	2376.83	2405.47	0	0	0	0	0	0	0	0	0	0	0	0	3310.31	1621.3	4140.8	8375.86	6584.92	6099.01	2291.6	1495.86
4020	223.061	223.059	223.062	208.132	206.093	210.211	5	5	3329.43	4030.34	7925.15	3651.08	5228.7	6115.39	1719.68	2713.57	8203.8	4761.73	6358.22	11519.6	9232.22	5802.37	6287.92	18671.7	19977.6	20475.7	3807.18	7925.84	6151.16	3224.34	3977.43	8374.53	3006.01	6213.91	8955	6143.11	8709.66	8192.19	4221.7	10389.2	10826.7	7710.62	6127.64	6601.38	16647.2	19128.1	13268	6748.22	6329.47
7149	309.119	309.109	309.12	128.332	125.846	132.109	39	36	32912.9	35517.7	34959	32989.5	34572.2	34831.8	35560.8	38906.7	38275.3	49136.9	46802.8	55896.8	43016.5	39937	32486.5	19752.1	27946	25727.2	0	0	0	44952.1	47952.7	49024.7	44068.5	45721.1	49663.8	55810	59488.8	64500	65663.8	58844.3	66732.2	159184	96187.5	91429.8	193931	117127	131790	0	897.184
8934	349.187	349.185	349.187	259.608	256.253	262.133	36	36	23956.9	41875	28524.9	28355.9	33225.9	30695.5	33959.2	49280.2	30014.8	26835.5	31195.7	40351.6	27857.2	27220.1	18793.2	43716.7	31161.3	51015.3	25334.1	16897.5	22293.1	26526.7	24785.6	29229.9	23266.9	25898.2	21963.2	19988.5	29111.2	35073	32318.5	27838.3	31801	29129.1	15098.9	23925.9	43222.7	24122.3	37788.7	20214.3	24166.5
10189	381.177	381.175	381.179	288.447	287.792	288.988	12	12	3315.22	2368.72	0	3616.82	2430.57	3191.35	1561.31	2319.63	3288.78	4673.32	4848.08	4800.75	4475.24	4358.66	4901.47	6959.25	7836.95	6023.19	0	0	0	0	1042.3	735.61	0	795.934	0	2331.11	704.365	1584.92	2867.49	3211.93	761.315	1721.65	700.619	3128.51	5447.17	4469.02	5606.68	0	0
13810	497.126	497.125	497.13	235.365	231.771	236.089	11	11	17643	17305.8	19630.2	17488.4	17797	20434.2	15981.8	17081.6	20878.6	19540.7	22168.7	23283.6	20186.8	23817.1	3253.69	52616.2	60521.3	64248.9	8546.15	7743.63	8339.03	30918.8	31473.8	31408.5	28625.7	31647.8	33633	36327.2	34606.3	36664.4	35368.6	37405.5	38981.5	67297	65027.8	61832.2	140237	133662	138183	14874.5	12687.1
14131	510.01	510.01	510.012	130.554	125.858	131.169	7	7	0	0	0	0	0	0	0	0	0	0	0	0	0	0	0	63692.9	54562.1	55826.1	0	0	0	0	0	0	0	0	0	0	0	0	0	0	0	35723.5	24371.6	29366.3	24531.7	26963	33358.8	0	0
14352	519.08	519.078	519.081	299.388	298.603	300.059	11	11	0	0	0	0	0	0	0	0	0	1558.24	772.564	1558.44	1563.97	2409.38	3407.02	6027.73	5286.21	4965.26	0	0	0	0	0	0	0	0	0	0	0	0	2320.55	0	1600.08	5493.69	4341.71	4207.94	10791.7	11975.9	13477.6	2449.35	1496.8
15231	551.176	551.164	551.178	302.145	300.821	307.418	37	36	19521.4	19909.9	20121	19195.4	20924.9	21890.7	18163.2	19584	21675.8	23985.2	25241.4	24128.2	27630.1	27635.7	29339.2	29382.2	24503.1	31289.4	11453.1	12221.5	11721.4	13993.4	15118	15963.5	16662.4	17551.4	17560.4	14361.1	16644.2	18322.4	18745.6	18330.8	21022.3	21183.2	21833.6	20100.8	22640.3	25359.6	26458.4	12629.4	11270.4
20244	813.49	813.489	813.506	842.089	839.907	846.295	11	11	86868.1	0	53836.5	173874	0	46093	125024	0	67061.1	52025.4	0	65654.7	67213.3	313710	231276	128368	130274	219776	10921.4	20932.6	6454.51	40758.3	0	53351.5	10649.6	39650.1	43261.3	982.665	65510.3	24957.5	1507.52	63294	9785.09	239317	175835	102798	141686	203581	74469.6	24891.3	18547
9004	351.13	351.127	351.13	171.361	169.533	172.085	42	42	79208.3	72927.8	80937.4	75412.4	78971	81646.3	75342.5	78057.7	82404.1	99310.8	96850.1	103125	72361.8	72785.7	75730.6	122625	131447	126998	45418	44163.7	46112.2	99373.7	99236.1	104871	99486.1	103314	105097	127067	130520	138745	122736	122207	132733	107596	110182	117982	138778	139116	148734	58811	59663.3
9030	352.01	352.008	352.012	70.2957	69.2451	72.0655	17	17	17996.8	13932.4	6367.26	13180	10395.3	3674.44	15180	7661.23	1729.74	17703.8	8361.35	6033.18	10161.9	14154.4	10357.8	13370.3	10208.7	11594.3	3501.16	1526.39	720.318	8206.26	1690.45	0	6737.05	2219.53	9165.45	9505.24	5992.7	5559.93	10470.1	4915.71	8491.24	10454.6	10813.2	12501.5	4273.45	7074.66	6003.45	5035.56	4801.59
11620	421.208	421.206	421.209	304.102	303.313	304.899	24	24	6461.23	5649.56	2887.25	4449.04	1434.96	6902.33	4159.92	7729.69	3507.8	7653.24	6128.24	9040.99	8492.64	10054.5	9155.63	8922.7	6388.81	8888.93	0	0	0	2394.67	2955.14	4376.1	1799.97	3590.35	2532.26	3122.05	3354.01	755.751	3445.66	3770.6	5325.3	5255.71	5209.55	2581.85	5061.21	4707.67	3695.42	789.13	691.671
11905	431.098	431.096	431.099	354.534	354.019	354.944	33	33	37554.9	38598	37548	35761.8	36213.4	36524.7	49632.8	52145.4	55134.4	221013	230727	242628	49306.4	51664.9	46714.9	44680.6	44132.6	43036.4	5113.51	45505.1	43525.7	18587.8	17555	17419.9	15124.7	20528.7	25114.4	73934.1	80236.4	81320.6	235187	246823	258045	101556	87625.2	94862.7	84705.2	86794.6	80131.4	8287.97	7972.63
12861	461.109	461.108	461.11	361.764	361.207	362.075	16	16	3718.86	4202.6	7658.96	2145.14	3521.93	3887.61	3205.25	1636.28	4160.27	49033.3	47645.1	52169.7	10728.5	9639.72	15016.6	6587.28	3884.39	14797.8	2507.83	3948.34	3545.8	2178.44	2170.87	1645.39	4062.18	2502.6	5975.2	3212.85	4036.52	4180.64	47611.4	51520.3	51238.4	23419.1	21536.6	22661.6	21400.3	23255.1	25496.8	7319.84	4084.8
13050	467.213	467.211	467.215	304.084	303.355	304.499	33	33	8053.27	7224.86	11116.6	9069.95	8920.87	9968.67	10265.9	9402.31	10043.5	11858.3	12127.2	13970.3	15854.8	13148.2	13718.5	15038	14978.1	13584.5	0	2344.89	2201.1	5167.87	6054.21	6811.4	6727.53	6757.41	9287.62	6621.02	7261.96	6278.41	8636.72	7930.07	9965.98	7752.66	7280.45	9226.23	5800.35	9244.39	6839.9	3108.44	4353.08
13260	475.159	475.157	475.16	402.988	397.605	404.333	53	40	79850.3	114740	272587	221531	237446	282034	118710	406316	444539	262491	427814	353998	164763	458437	338653	166655	350113	280916	186135	130156	127044	214213	205951	249126	238586	244035	163937	230510	127085	248212	287756	413470	286649	241831	283433	297453	140853	448060	213363	163636	167030
13434	481.135	481.126	481.135	227.08	225.294	227.396	15	15	0	0	0	0	0	0	0	0	0	0	0	0	0	0	0	0	0	0	0	0	0	29486.1	28456.2	28946.1	29245.8	32088.3	34033.9	32533.3	33418.9	34929.3	30953.6	37891.7	36219.8	30591.7	37331.9	34405.6	30355.3	26355.4	28223.8	6955.14	6903.99
13650	491.076	491.075	491.077	289.68	289.116	290.281	21	21	2171.28	700.244	2261.36	0	1552.45	2848.66	2242.88	3019.64	5681.4	5440.38	6077.94	5504.49	1394.41	938.815	1618.86	12022.8	10265.9	13682.6	18315.3	13779.6	16944.7	230233	265417	248492	212705	258773	218725	192605	187650	197682	180419	188865	193467	197488	219862	228826	213110	217771	234082	86818.5	82764
15885	577.156	577.154	577.157	266.769	266.441	267.46	42	42	1.02405e+06	959508	1.00654e+06	946890	917503	953206	923555	934326	998045	910663	934343	996292	937368	918177	957840	897671	890538	945911	468313	451289	447759	722801	762264	794984	712445	770162	799501	636797	681642	709797	680318	716662	742961	680403	674709	697039	711201	693912	723206	557419	551788
16496	605.999	605.995	606.001	214.107	213.462	215.07	20	20	0	0	0	0	0	0	0	0	0	0	0	0	0	0	0	0	0	0	0	0	0	4544.96	4029.69	7212.14	3779.56	5755.77	4708.9	6013.35	6324.22	5140.18	6608.96	6341.41	7123.79	5749.69	5721.2	5307.97	6759.57	7097.56	6436.87	837.475	3033.99
16615	613.133	613.13	613.133	266.762	266.215	267.417	42	42	144481	157715	163232	137249	142783	162321	145859	148579	172465	140186	143005	159649	133400	148076	154519	155078	159815	167840	77633.1	78660.2	79074.8	115930	127433	136026	117751	125174	134441	106755	117245	119875	112415	119385	125852	109858	107140	117442	124656	126738	137263	97726.9	101360
17134	643.974	643.968	643.975	214.122	213.034	214.717	21	21	0	0	0	0	0	0	0	0	0	0	0	0	0	0	0	0	0	0	0	0	0	8387.26	8412.52	10127.3	5578.54	9491.7	8126.03	10181.7	11308.5	8692.22	10119.5	10998	10670	8383.89	6753.43	8315.38	10744.9	9310.78	10141.2	6898.45	8425.42
9642	367.104	367.102	367.107	169.359	168.523	170.482	15	15	4101.89	3619.13	21977.8	4641.91	20003.1	8408.58	4815.41	24366.8	26870.3	6388.29	6165.04	7383.4	19265.7	18160	21484.5	27214.7	31666.2	31543.9	0	0	0	3182.61	18223.6	4854.16	15393.3	16786.3	4185.26	19007.1	22376.6	24069.8	6135.8	18442.5	5651.64	15279	4839.4	4929.21	14694.8	17767.4	16037.1	0	0
15226	551.177	551.172	551.177	215.09	208.302	215.789	43	42	129173	120668	173146	127489	172247	184594	137159	168683	194569	205667	211473	252022	268429	248135	253370	373007	356150	366121	71058	66994	69271.1	132585	167912	175401	157112	182029	193482	186015	202442	203244	196571	221311	225865	236220	221922	229301	306136	291333	294896	51553	51550.5
16800	624.179	624.175	624.179	139.396	139.198	139.912	30	30	0	0	0	15758.3	18701.6	20170.7	33426.7	35611.3	36881.4	48864.5	50887.7	56073.1	25445.6	28375.2	30599.7	32075.5	35607.2	38212.7	0	0	0	0	0	0	23172.4	26382.2	26250.7	56632.6	59625.3	60180.1	58815	63248.4	67534.9	32494.1	33979	37204.1	22877.1	23815.6	24903.7	0	0
6732	299.077	299.074	299.084	118.981	115.572	124.695	33	32	23376.8	23741.3	23559.3	19251.1	20546.1	16283.5	17254.8	17132.4	22100.1	29738.4	29513	31781.1	21869.2	22598.2	22493.3	7711.19	7666.73	14029.3	8727.73	12512.5	11342.3	86526.4	78509.6	89990.2	87823.3	93891.3	96786	100542	108928	104799	104008	113014	131114	84212.5	82502.9	76776.9	151787	157510	155605	26438.6	23613.3
7840	325.054	325.052	325.055	171.126	169.981	172.203	33	33	8155.8	8129.64	7290.24	5962.79	8147.23	8737.72	9280.12	8194.66	9355.67	12658.3	10913.5	11667.7	5271.7	3592.85	5121.15	13223.4	8875.15	10835.8	0	0	0	4845.07	4196.18	4606.4	4606.97	4583.5	5218.93	4782.19	7723.42	5958.79	3930.53	6746.67	5787.37	2836.57	4530.64	6747.55	5790.74	5500.37	5761.37	0	713.095
8688	343.102	343.101	343.106	245.41	244.744	246.322	10	10	3604.93	1821.93	3481.29	3419.97	3056.54	3201.7	2784.55	1422.4	5129.33	5806.83	2613.77	4625.27	2234.34	1405.1	767.538	5087.02	3425.33	4038.23	696.057	0	0	1488.55	1647.47	2560.54	2532.5	1527.5	2213.62	1760.12	2553.2	4101.31	4654.3	683.446	1920.35	1723.13	1675.44	1801.92	2328.83	2305.25	3088.54	0	803.592
10135	380.099	380.097	380.102	189.717	189.128	190.09	39	39	45569.5	42312.8	45876.4	42632	42548.1	45484.2	46956.9	43912	47836.7	50216.2	50781	60627.6	55276.7	52631.5	55045.7	60650.2	61785.5	63046	3640.64	5875.07	3857.23	39932	42118	46259.5	40498.6	45380.2	45732.6	48219.9	50821.3	51750.2	48703.9	49480.7	54448	45634.2	45920	45760.9	44586.6	48127	47444.5	7210.58	7074.01
14151	511.145	511.143	511.146	218.415	218.094	218.81	18	18	694.421	842.029	0	0	0	0	0	0	754.581	0	0	0	0	0	0	10952.9	10241.4	13326.8	14137.8	16810.2	16671.5	38729	43461.5	45326.7	43934.7	47012.4	46424	54478	51254.2	54895.4	55800.8	55213.3	56551.2	60072.1	56955	61544.4	67449.1	66114.2	68021.4	24449.6	24508
15449	559.109	559.106	559.111	407.558	405.285	409.213	22	22	14451.1	14815	9683.27	13223.4	9489.8	9888.8	1439.16	2187	5653.16	2604.35	2217	6371.68	5480.63	9233.01	8201.06	10950.8	8397	8118.63	0	0	0	2328.38	2468.77	2761.55	12008.1	11659.4	12295.8	5550.68	6987.15	11621.4	3149.02	4837.79	3884	15468.1	5977.4	6273.52	11023.8	7846.94	9755.46	3701.01	3797.45
17389	659.183	659.179	659.183	154.338	153.653	155.109	18	18	0	0	0	0	0	0	0	0	0	0	0	0	0	0	0	0	0	0	0	0	0	158809	165519	171564	165739	166564	166211	213206	221641	229501	212817	212709	221942	194966	199559	205679	238020	252553	238776	0	0
17823	683.255	683.25	683.257	207.412	206.696	208.12	29	29	3090.37	4292.74	2499.56	4819.49	4493.46	3289.31	3771.26	1729.88	3636.77	7526	5859.95	7558.19	6835.03	7676.04	8364.32	8027	8874.81	8097.31	1675.98	2351.78	763.623	2424.66	856.573	3753.88	3358.86	736.884	3843.2	3968.7	3720.35	4826.13	4371.76	5331.43	7401.52	7582.64	5466.55	7108.83	5103.6	3838.08	4987.7	0	0
18500	717.274	717.272	717.278	229.931	229.213	231.183	8	8	1498.43	3043.3	758.533	780.498	800.383	2240.72	692.602	2443.02	0	2611.67	3139.8	4288.65	6632.77	2791.36	6395.17	6242.51	5914.74	5374.92	0	0	0	0	0	0	0	0	0	722.385	0	716.281	849.659	1542	2497.03	1524.21	693.451	0	1663.84	1564.79	771.177	0	0
20585	834.522	834.509	834.523	840.903	835.793	844.49	13	12	267099	52080.8	37910.9	60586.3	36374.6	15862.4	53465.8	29668.6	1435.34	37245.2	80631.8	1440.85	411746	417377	103607	882306	156663	89902.2	709.332	0	0	46791	92676.4	31566	30764.4	47167.9	176460	44165.6	56986.3	1.34606e+06	37600.5	54729.2	1.19993e+06	754641	178677	81064.4	358049	144846	73906.5	802.099	0
9801	371.098	371.096	371.11	161.176	160.447	161.704	21	21	1425.98	3246.49	3376.47	4038.34	711.265	1650.79	3900.92	3173.4	4315.06	4627.16	5170.26	3616.92	3487.71	3680.54	3471.02	8997.02	14391.9	15435.1	0	0	0	51838.8	52588.5	54718.5	58574	52822.4	52114.5	69263.2	64688.7	64513.7	64712.4	59799.1	60441.7	80209.3	81113.2	81057.9	61700.2	73030.7	72724.6	728.018	0
10734	395.119	395.118	395.121	171.39	169.552	172.185	42	42	16695.6	14254.1	14756.2	13003.7	14483.6	12262.9	15459.9	14537	14978.8	16444.6	17666.8	18407.2	11964.2	10123.7	12220.6	21931.9	24300	26165.5	9351.49	5855.88	8514.29	19116.2	19121.4	15389.5	20779.8	17115.3	19554	22818.8	25735.4	23156.1	21457.9	23743.5	20727.1	20222.7	19044.6	18669	26079.8	26994.1	29326	12295	11130.2
12448	447.259	447.258	447.261	579.308	578.833	580.225	22	22	8330.96	4493.08	5269.31	6572.32	4488.57	7121.93	8007.56	9784.29	8547.12	8992.31	8049.67	7298.6	8177.01	10749	8174.63	6704.74	13128.9	7763.94	2899.49	2528.14	1049.78	1666.51	2336.83	2365.83	3366.42	4268.32	4238.18	3033.43	1619.84	3431.02	3474.65	3622.08	3690.19	4506.31	5323.05	4249.51	3888.89	3749.26	4710.16	0	924.994
18689	727.245	727.244	727.247	225.239	224.504	225.933	9	9	3702.56	2291.04	2301.14	4382.62	2631.83	3021.21	3837.93	750.057	1656.02	4452.43	2998.09	3519.08	3437.28	4328.06	4896.16	5905.32	5130.35	2732.9	0	0	0	0	2578.64	837.064	756.816	1055.4	2292.05	1521.46	2157.07	1736.73	713.196	2513.39	1696.64	2215.28	2686.5	2265.94	0	1455.87	2569.32	0	0
18731	729.261	729.256	729.263	207.456	206.83	207.874	36	36	12653.5	10924.4	11409	11390.4	10202	10991	12078.6	11905.4	11563.6	15393.1	15804	16886.8	17522.4	16856.8	15952.1	20496.9	19457.6	19829.7	0	0	0	9022.18	9409.35	9630.65	9408.58	10823.3	10274.1	11812.9	11505.4	12148.1	11862.6	11914.3	13176.5	14646.5	12924.9	14253.3	12219.7	11916.6	12517.8	0	0
21427	925.334	925.329	925.335	230.13	229.862	230.814	36	36	17929.5	17167	16433.5	17548.8	17401.6	18061.7	17927.3	17138.1	16396.1	22532.3	22216.5	22667.5	27673.2	21620.4	23180	30621.9	28978.2	30958.8	0	0	0	9101.54	10883.6	9942.64	11533.8	10920	11706.3	12160.8	12885.9	11336.8	12773.7	14470.9	14572.1	15361.7	15705.7	14817.6	16809.5	16171.5	16607.3	0	0
22259	987.29	987.285	987.291	302.388	302.005	303.473	42	42	67374	76763.9	80639.9	71986.6	82833.9	83539.1	74709.5	86228.9	92782.7	86883.2	91904.9	101308	95606.9	96463.4	99629.4	103319	108004	118640	14610.4	13456.7	13428.4	50177.1	55168	60385.6	55431.8	61685.6	67234	56956	61968.4	66245	64879.3	67241.1	75922.2	71697.7	70688.3	73997	73397.7	72996.2	77965.6	11471.2	12351.9
14415	521.166	521.164	521.168	213.67	213.347	214.717	21	21	761.626	0	0	0	754.02	0	0	0	0	1442.12	1593.52	2365.89	953.061	2510.33	2441.94	3340.78	5691.76	4112.41	0	0	0	6962.93	6593.52	9707.42	8153.96	7895.81	11627.6	10336.5	11978.6	10625.5	11293	11315.6	12292.9	14433	12290.2	14368	15013.5	14314.4	14630.9	0	0
17217	649.177	649.175	649.179	274.19	273.404	275.161	29	29	3405.33	2384.76	975.419	3239.64	1582.31	2513.79	3205.04	3194.73	3135.04	4551.62	4169.56	6148.15	6252.36	7578.45	7823.02	10878.3	12806.4	11972.6	0	0	0	3453.17	5215.74	4713.92	6812.1	5746.9	3553.44	3532.94	5268.02	5542.67	7070.45	5964.83	6577.14	8572.4	8779.55	8106.02	11102.3	10524.3	9523.54	0	0
6543	295.082	295.078	295.084	354.126	353.1	354.818	21	21	2806.72	4819.04	3087.91	3137.13	5447.56	3818.49	4351.13	4909.08	5622.84	3148.57	2633.45	4620.75	5003.15	7018.66	4955.93	5682.98	6489.66	5894.06	7990.55	5752.84	7038.45	3167.52	711.847	3406.42	2439.6	744.024	2234.73	1563.62	2026.29	1792.76	4025.08	3342.21	1145.62	2216	1931.54	1530.16	3068.89	5894.09	4421.01	6506.28	6235.03
7356	313.093	313.092	313.096	181.487	180.66	185.737	41	41	19935.5	18098.8	19772.3	20352.5	20494.1	23474.1	21385.5	21339.7	25319.5	23801.6	30861.1	32974.5	46877.2	46179.2	26851.6	82390.5	82671.9	84498.4	121179	112406	109220	16424.1	16834.9	18262.9	14965.7	18230.5	17788.1	22151.2	23116.8	22743.9	24960.5	31885.4	27969.8	53209.7	53981.3	55024.3	89058.3	95175.3	93427.6	181107	170026
19333	759.25	759.244	759.251	352.657	351.507	353.437	42	42	58256.8	67677.6	71396.4	69417	66263.2	68578	68048.3	65616.1	73928.2	51529.4	75065.4	78265.3	82341.7	74465.4	80010.1	83640.4	56148.3	92695.4	102626	95836.2	95197.8	33743.6	51371.9	53321	53196.7	53971.1	56520.8	51894.5	51028.9	54935	56415	54097.8	60917.5	58649.4	61814.3	62924.9	67370	76345.6	75332.6	110715	110352
14744	533.167	533.164	533.17	353.278	351.835	355.871	19	19	5589.7	6519.61	7265.54	3753.57	6189.94	6396.31	5867.58	5081.88	6797.01	7191.05	7160.44	6126.71	4670.35	7041.96	7586.82	10408.1	11017.8	8390.56	7447.81	7289.91	8270.99	905.639	1455.75	748.578	3659.36	3261.93	2171.99	1435.32	2847.42	3266.04	3893.11	1682.74	4123.16	3456.53	3644.82	2531.21	3604.78	3044.37	4612.59	7560.28	6260.28
4522	241.072	241.07	241.072	251.314	250.45	253.166	38	38	3348.98	4187.47	1542.04	3184.73	5703.2	6171.44	7272.64	9806.25	9258.24	88474.8	84321.6	91944.3	420115	408161	415365	1.29743e+06	1.32674e+06	1.36259e+06	2.52652e+06	2.32805e+06	2.23629e+06	4439.7	4675.44	7242.28	4764.23	6042.56	7426.15	12838.6	13440.4	14495.3	67439.9	66837.5	72921.1	372608	369036	373892	1.06601e+06	1.05169e+06	1.10172e+06	2.33599e+06	2.26625e+06
12641	454.104	454.098	454.114	186.076	183.147	190.75	12	11	0	0	0	0	696.735	0	0	0	0	0	0	0	0	0	0	6971.87	6490.22	6677.36	8294.91	9738.24	10850.6	0	0	0	0	0	0	0	738.263	0	0	0	691.502	6466.64	6351.24	10880.5	9509.7	7306.15	11917.9	17216.1	15161.7
14632	529.098	529.096	529.103	304.189	302.858	304.764	38	38	9782.19	7862.3	10826.4	9427.27	8399.6	8661.5	3778.72	3292.81	4858.32	3598.3	3377.68	5516.77	4766.68	1650.33	4575.53	11487.5	9439.16	11932.3	11419	11821.4	11903.3	28159.4	29614.5	32470.9	28916.8	31495.3	32520.8	26078	27320	28486.2	26662.1	28971.3	26751.6	38251.8	32466.8	35754.9	44390.1	44666.8	47821.9	58029.3	56329.2
14793	535.145	535.143	535.147	283.717	281.564	286.363	19	18	15634.3	17815.2	18591.3	17180.6	18991.1	19786.7	12895.9	11733	12897.4	14324.9	18393.5	21181.4	13317.3	12148.7	5965.32	35462.8	37997.3	36658.2	39422.4	39070.2	36590.6	26117.6	28060.2	27024	24172	31932.3	30821.4	34773.3	38469.3	39789.5	40041.6	39750.9	44211.5	41796.2	44825.8	44947.1	81296.3	59396.2	80177.7	110129	111263
15688	568.132	568.13	568.134	309.604	308.904	310.403	36	36	5452.43	8340.37	9273.21	5669.12	7592.91	6758.12	8024.49	5558.78	12306.3	10482.8	13264.7	13751.8	16768.1	16319.1	15546.2	19815.8	16495.3	18573.8	20524.5	18154.1	20255.7	3606.11	6689.75	5232.32	2964.99	4547.35	7077.88	7793.37	5076.29	6791.33	6775.41	7340.23	8553.92	11280.8	10755.2	10522.9	10348.2	10057.5	9430.69	18832	16588.4
17397	659.234	659.232	659.235	453.568	451.55	454.565	6	6	17297.9	18590.7	17461.4	0	0	691.19	0	0	0	0	0	0	0	0	0	9738.66	10856.8	14270	3052.82	5933.8	3686.01	5897.64	5266.44	6592.1	0	0	0	0	0	0	0	0	0	0	0	0	12270.5	14449.3	16921.6	23553.9	25639.8
19300	757.199	757.194	757.203	362.692	362.042	363.601	13	13	8474.36	7048.23	7064.22	6189.44	4597.57	5971.06	1486.83	2725.8	3010.83	2550.76	1769.5	4075.75	3148.34	4536.2	1555.23	4347.46	4576.01	7228.71	8431.75	4282.06	5669.77	8927.62	7419.4	8722.75	9645.66	11899.5	8206.85	7202.07	6839.99	8874.68	7984.7	7321.41	7988.73	9015.34	9238.88	8795.9	11611	9783.57	10400.4	10491.8	11432.2
19790	789.26	789.255	789.262	381.716	380.285	383.462	38	38	9440	12856.2	10021.5	19868.9	18170.2	18805.1	27787.5	28418.5	42716.7	36076.4	51318.7	57844.4	70126.2	73169	55365	93187	103125	95263.6	139723	144406	133941	5684.39	4711.54	10226.6	19161.4	19381.2	24340.5	26518	27647.8	28000.2	28532.8	38199.6	42346.9	56278	42229.8	49686.6	66918.7	67666.5	69371.5	131104	136868
12732	457.114	457.113	457.116	335.55	333.731	336.241	22	22	1466.89	0	0	685.214	0	714.183	0	0	0	0	0	0	0	1565.28	690.351	701.091	0	755.197	842.757	3247.81	1466.86	10877	9993.09	12717.6	11097.2	10060.1	11791.7	10483.4	8932.13	10245.9	12780.3	14757.4	13619.4	13068.1	14020.3	15157.8	16707.7	15831.6	18975.4	24268.6	23696.2
8778	345.154	345.151	345.155	275.308	267.174	276.824	13	13	5348	5355.35	8868.19	7308.34	5879.44	5786.51	788.043	0	729.978	3349.33	5304.62	9143.63	4429.68	2870.15	3450.59	9737.84	12765	11489.5	8374.17	5697.67	10349	5617.79	8329.93	4606.11	7160.07	4492.32	7005.41	3194.55	4597.04	3999.12	2215.58	2915.49	2990.26	7347.46	4055.53	9140.08	17694.2	10122	17825.7	24167.5	33606.3
9164	355.067	355.066	355.069	238.761	237.572	240.165	10	10	705.921	0	721.098	756.425	877.318	1507.84	0	0	0	0	745.769	774.106	849.458	839.518	771.977	15134.2	15828.3	11442.6	18488.4	16180.4	16624.7	0	0	0	0	0	0	0	0	0	0	0	0	0	0	0	4104.18	3984.59	2569.02	5446.78	5369.7
9957	375.202	375.2	375.204	429.562	422.987	430.53	47	42	43169.2	69613.8	58627.7	49177.3	64676.5	53041.3	52195.7	55246.2	66280.3	58937.6	74468.6	58523.7	94112.4	97327	74775.6	109754	79957.3	101304	110267	76398.6	104508	21489.4	39690.6	46066.6	34628.9	36626	37233.6	25359	46862.1	30002.5	54140.2	54372.6	51808.3	47160.9	38577.9	49275.1	57093.1	62838.2	73541.3	110630	74228.3
9958	375.202	375.2	375.203	439.559	438.203	443.323	43	42	54560.8	66018.7	63033.9	41677.9	58873.8	54599.4	69335.2	67549.5	79225.8	67129.1	80634	74655.8	105758	79408	89595.5	94010.7	91964.6	96899.5	108878	102759	101006	27617.7	45775	52631.6	22681	51282.3	43326.4	32217.7	50761.1	44637.9	44676.9	54863.9	59996.7	59625.1	58725.8	33976.4	62964.1	64663.9	58708.1	94037.6	95639.1
4504	240.065	240.064	240.066	217.807	216.798	218.205	11	11	0	0	0	0	0	0	0	0	0	0	0	0	0	0	683.561	7277.93	8900.7	9352.57	14751.2	16259.1	13933.6	0	0	0	0	0	0	0	0	0	0	0	0	0	0	0	9069.6	10013.9	7475.3	22489.5	20139.6
4524	241.073	241.073	241.073	217.515	216.384	217.826	16	16	0	0	2533.29	0	0	0	0	0	0	3560.13	3816.94	5169.08	23083.3	23670	23792.7	107734	121246	126088	178146	179922	171917	1554.77	831.127	2617.68	0	0	0	0	1694.69	705.242	7283.72	7962.94	7861.11	26220.5	26761.9	29794	116396	117820	125847	250851	243363
8985	351.004	351.003	351.006	259.884	259.12	260.642	40	40	16163.6	15018.7	12439.5	15230	14802.7	13773.7	15043.9	13448.8	15151.8	18913.2	19861	19124.4	23638.4	23514	22701.5	39946.2	36362.9	37653	37550.8	38261.9	35199.6	8044.74	9576.35	10297.9	9735.47	10476	10588.6	10258.6	12230.6	9850.95	10354.3	14515.7	14024.9	14744.5	13652.4	14358.5	22680.9	20152.4	23510.8	28467.9	32004.9
10263	383.113	383.113	383.115	342.266	341.59	342.673	7	7	1515.32	827.666	0	706.634	747.567	0	0	0	748.995	5414.1	6204.53	6590.9	16778.6	13565.7	14618.9	22364.2	23195	23581.5	84806.5	81108	79540.4	0	0	691.12	0	0	0	0	0	0	773.667	735.648	2436.04	3419.07	754.645	6199.24	8260.41	7835.26	7231.22	23370.3	24800.1
10341	385.093	385.091	385.094	334.838	332.085	335.807	42	42	62882.2	60962.1	66696.1	58105.2	58671.2	64423.9	43393.7	48798.3	50672.3	46200.9	50055.9	52594.5	44140.8	43921.4	43204.9	67718.9	66520.6	67343.8	60375.7	58778.8	57633.7	700010	732431	789621	705342	745563	787849	635195	662975	700527	656653	690233	725927	728170	703557	735549	803748	812482	806413	906670	893219
10442	387.109	387.108	387.112	320.64	319.761	321.507	19	19	2402.7	0	0	2272.4	912.182	0	2435.72	0	0	2469.26	1591.41	1441.61	4654.64	3524.85	5074.97	10345.6	7538.56	10207.3	14940.5	16861.5	14503.1	4147.1	2388.57	3283.6	4055.46	740.605	4128.46	2656.11	2374.05	1625.75	4509.41	3825.88	4495.03	5775.44	6816.21	9210.4	10951.1	11200.9	12570.8	17016.6	19305
10613	391.197	391.197	391.198	293.933	290.43	296.466	15	14	18584.1	17478.2	19650.7	21657.2	19932.4	21951.5	20483.8	21118.2	21857.8	30355.2	27177.4	27798.2	24190.3	41499.4	24995.3	56204.9	44237.7	57833.6	103010	44204.6	43963.7	14693.5	14149.4	13738.5	16705.8	15707	22296.3	18191.5	19553	19145.7	17595.8	19588	20843.7	22829	23857	23433.4	28716.7	24147.1	28122.7	33289.8	59469.1
11840	429.082	429.079	429.083	350.655	348.021	351.978	31	31	21245.6	32623.7	15999.7	19684.1	31287.4	30890.6	31335.8	30612.4	30806.4	37152.3	34804.4	17752.9	14699.6	37094.6	19627.3	48001.8	48587.7	25273	26359.5	27404.9	24538.7	142905	133663	143019	133103	128671	136391	126290	122400	133817	126711	125900	126594	144740	138672	147392	162704	184260	183040	204567	198935
12111	437.239	437.237	437.24	379.924	370.215	382.142	67	42	143535	153753	267784	183113	249526	272754	158644	301964	332228	326024	263734	299476	391888	198370	358798	396976	410246	208042	352171	344309	352325	131778	136497	131606	143390	131425	265874	145992	224371	322525	117303	293927	299556	296197	157563	221478	324998	96407.4	309595	377415	310960
13476	483.245	483.241	483.245	358.753	358.135	359.276	42	42	531323	511793	549394	451504	503278	504510	567431	505351	546164	562391	582382	610496	639742	654884	619544	638427	623933	667986	489523	468814	480903	380594	377580	427592	376921	402033	400358	352827	342431	380455	368134	396232	429287	404194	415647	421506	454704	454639	410175	524133	519716
14851	537.161	537.159	537.162	335.672	335.113	336.426	42	42	131572	126564	133493	124215	123039	134427	133417	133963	144949	132286	138096	146570	157465	143603	150746	149228	154884	152257	122761	120246	120025	185956	198635	212480	200899	208905	221407	189600	201560	209979	199823	217564	225798	228544	222037	223265	244703	242918	234258	289302	274495
15851	575.136	575.129	575.14	297.028	296.369	297.853	5	5	0	0	0	0	0	0	0	0	0	0	687.022	835.284	0	710.838	696.682	4183.22	4441.87	5723.02	1406.77	3720.76	4278.97	0	0	0	0	0	0	0	0	0	693.157	1569.74	0	720.337	729.875	0	2272.06	736.403	1560.07	5565.14	5816.55
16511	607.122	607.12	607.125	240.197	239.506	240.649	9	9	0	0	0	0	0	0	693.995	877.907	0	704.709	0	0	1471.8	1515.81	1641.77	6370.68	7045.96	8488.43	8443.45	8508.88	7618.01	0	0	0	0	0	791.509	0	0	0	0	0	722.456	2130.75	1550.24	2369.21	5169.93	4771.13	3965.84	9676.98	9535.45
18252	705.162	705.161	705.165	278.361	275.967	280.845	5	5	1044.4	858.558	1474.27	3234.28	981.746	2396.21	926.147	687.391	1685.87	2599.31	779.973	2196.33	4095.18	4720.84	3738.06	5422.27	5983.16	6925.48	7337.73	5701.34	4838.93	0	701.726	0	776.302	0	1595.31	725.993	775.564	1580.08	0	2902.07	942.712	1560.24	732.51	3684.87	3664.02	4055.62	4249.93	9436.7	13487.7
4940	255.089	255.088	255.089	217.496	216.994	218.173	32	32	742.548	704.915	693.879	4220.26	3519.31	2984.33	8783.09	8278.26	9640.53	42356.8	36803.3	37108.2	162841	157008	160982	744226	767482	801165	1.24094e+06	1.20902e+06	1.18153e+06	0	0	769.201	3561.97	2456.65	3486.91	11112.9	11871.4	10216.5	43858.6	41286.3	40981.2	183154	175574	187414	791534	805048	818578	1.60663e+06	1.61766e+06
5844	278.103	278.102	278.103	305.182	304.509	305.488	6	6	0	0	0	0	0	0	0	702.757	0	0	695.612	1553.42	1753.74	695.663	1480.5	5958.71	3116.69	5195.17	6092.81	3797.03	5135.17	0	0	0	0	0	0	0	0	0	0	0	1742.22	785.416	1535.45	817.107	3314.42	6018.76	1462.46	8111.92	9251.48
5882	279.091	279.089	279.092	190.457	189.657	195.285	15	14	0	0	2313.91	725.753	801.513	1576.01	1663.06	0	790.281	0	1742.23	3563.38	740.331	0	0	4572.39	4218.65	3623.69	8129.59	4555.32	4605.49	4133.45	1085.94	4301.89	1025.4	2718.75	1471.02	4409.81	5825.69	4638.68	3262.13	4441.83	2152.58	1936.25	1510.29	3376.84	5052.81	5716.96	6336.51	8445.7	14632.6
6788	300.109	300.108	300.11	204.925	204.504	205.628	42	42	29977	30102.5	29224.3	33318.6	30403.6	35676.6	35511.3	31610.7	37350.4	40040.9	44144.7	45729.5	38626	36071.6	38737.9	72806.7	71057.8	74246.5	72977.5	76706.7	74493.7	22552.3	26216.6	25603.5	25425.6	24690.2	28375.3	31694.1	31601.8	32340.3	31437	33794.2	35902.6	34481.2	35016.3	36420.7	53279.2	52842.1	55003.7	73542	69166.6
7618	320.078	320.077	320.079	221.129	220.353	221.94	13	13	2392.52	1400.81	746.762	808.74	828.408	841.287	0	1478.84	735.951	2937.76	2597.68	3158.81	3394.48	3220.63	1908.09	5604.23	5987.35	7053.62	8492.63	7938.86	6682.08	2311.66	0	1887.93	0	925.921	1579.33	885.666	1476.88	744.596	1373.98	770.571	2507.02	1611.14	699.005	2108.52	6210.2	5569.27	2848.21	9052.73	8894.45
7737	323.126	323.124	323.128	219.474	218.49	220.21	43	42	21686.1	21416.2	18384	22590	20710.3	18887.8	23421.1	24300.3	25611.3	32852.5	33611.9	37432.8	40077.7	38970.3	38616.1	89800.2	85578.9	88219.7	146373	143534	139092	17236.3	16694.6	19020.7	19318.4	18668	20486.2	22935.7	25068.7	26118.3	25464.1	25950.7	32041.5	32722.8	32404.6	33184.4	78540.7	83980.1	84646.3	200644	199066
9261	357.104	357.097	357.106	39.6505	36.8017	41.5585	15	14	0	0	0	0	0	0	0	0	0	0	0	0	0	0	720.846	376900	276906	151997	1.11143e+06	578687	646025	0	0	0	0	0	0	0	0	0	0	0	0	8264.41	9052.51	8325.16	208162	251136	339113	523589	280798
10110	379.197	379.196	379.198	452.837	452.323	453.582	42	42	182710	178129	187088	180574	168773	178615	174924	167580	192495	179211	180970	180021	243380	264097	250571	234560	248686	250835	313904	277163	286374	126867	131245	133182	138566	127092	137213	112827	123622	125406	139403	135047	133885	156122	168804	175065	174765	173562	171105	264390	248109
10862	399.093	399.092	399.095	226.389	224.635	227.427	28	28	3838.81	4130.01	5129.46	4103.79	4666.43	4652.6	3685.45	5876.24	4424.01	6668.41	5753.39	9753.38	7463.68	4989.07	5580.01	20846	23401.8	22466.8	35477.5	33330.6	32104.6	732.893	767.598	1440.6	787.723	0	1689.13	0	0	2239.29	1601.04	2440.5	3444.32	3802.91	4128.37	3535.25	9590.65	9433.35	9239.7	17664.6	21921
11757	426.104	426.102	426.105	271.491	268.575	274.25	30	26	0	0	0	720.539	0	799.233	1566.05	3441.04	6094.11	7426.6	7055.94	7167.51	17070.6	15479.4	14384.9	27922.5	18387.3	30028.6	55411.7	55011.2	57595.7	7095.81	7385.89	5696.21	4736.58	9828.24	9868.05	9625.22	11866.5	9001.69	15615.3	16303.9	18904.8	24888.7	23595.9	20625.5	24707.2	36969	37906.9	73245.9	80570.4
11785	427.103	427.101	427.104	341.679	340.59	342.415	21	21	0	0	0	751.69	0	0	0	0	0	0	0	0	0	0	0	0	0	0	0	774.441	0	24875.2	25979.4	26342.1	26626.6	25990	28434.9	24120.2	25457.1	28502	26596.2	28078.3	30727.2	30612.2	31552.2	32150.8	33978.2	37070	38860.1	51354.8	51288.7
12358	445.114	445.112	445.116	273.932	272.776	274.97	38	38	17424.1	20453.7	16303.4	16501.4	15413.8	19171.9	7605.98	10084.6	11511.3	14887	13043.5	14777.7	1584.21	788.099	1407.16	39706.6	38736.9	40441.6	50308.5	50779.2	48041.8	39296.5	37500.1	42051.7	46430.2	50436.1	55504.1	51859	52834.4	59803.7	63403.8	67462.3	72600.4	84900.8	89800.2	91285.3	154503	162156	168764	247488	240653
13721	493.229	493.224	493.231	362.842	362.075	363.564	40	40	10004.2	10265.5	12065.5	11426.9	11116.7	8407.28	13020.3	9111.83	11621.3	14480.1	14507.5	14324.6	17270.3	16189.5	19610	19247.3	19572.9	19097.6	16197.3	17436.1	18379.6	5862.34	5073.09	6374.72	5696.42	4534.28	6151.23	5490.98	8290.97	5414.3	7525.71	7257.12	8369.06	8360.53	6783.94	9041.92	7973.12	11462.5	9135.04	15840	14414.5
13982	503.249	503.246	503.25	365.34	364.658	366.272	26	26	5310.83	2564.83	4492.67	4113.73	1174.66	4834.66	5373.68	5389.11	3184.49	7377.35	7265.06	8677.77	10534.5	8131.39	11110.2	11133.3	9628.08	11899.7	9125.4	8948.75	10319.4	2485.39	3051.8	3915.96	1852.17	1834.21	3605.76	679.558	2555.9	3149.26	2580.42	2903.06	3360.08	4333.91	4548.55	3918.64	5681.42	5866.73	5741.08	8345.76	9675.11
14014	505.134	505.119	505.135	274.118	270.632	274.774	44	42	66810.3	66341.4	71033.5	73984.8	69871.8	74700.4	68047.3	66972	75280.1	78895.4	81476.1	83155.3	96566.6	100029	100932	179454	183738	189492	186895	181400	180284	111551	109909	123424	117960	128750	127912	131296	137554	136025	136951	132352	150846	167179	158256	172973	265210	267023	288058	353900	367845
14250	515.118	515.113	515.122	339.662	338.811	340.93	10	10	4086.12	3142.62	3869.16	2212.66	2536.35	3248.14	0	0	0	1474.4	0	1469.15	0	0	0	3138.27	4127.21	4633.22	4947.33	3697.49	6153.62	0	0	0	0	0	836.954	743.203	0	689.604	1422.25	707.014	2627.93	1760.41	0	730.591	3229.04	3270.38	2483.1	8163.11	4550.46
14634	529.133	529.131	529.135	258.567	257.651	259.969	33	33	10064.5	10158.2	12720	12341.8	9698.4	10492.5	12228.8	8847.55	13649.9	14035.5	12890.3	15995.2	12456.6	17408.5	16232.8	27425.9	29662.5	25147.8	25664.2	31292.1	31858.4	6939.69	8853.07	13693.2	10977.5	9312.21	12848.6	10209.5	10403.2	11609.6	10839	10159.2	13803.4	16670.5	9643.94	13542.1	27550.5	24018.9	29651.1	32815.7	36399.3
14914	539.234	539.23	539.236	362.888	361.969	363.964	24	24	5414.72	5147.03	5342.56	4924.68	4397.18	3871.77	6902.99	5842.35	5805.23	5559.66	7017.79	8967.02	9907.34	9978.11	8668.47	9832.32	11782.4	9056.18	8973.21	9238.39	7158.56	1653.44	1722.82	3167.65	759.145	2317.14	1388.6	0	757.567	0	1595.1	0	3954.6	3187.18	3509.61	2372.12	2863.7	6330.18	3933.53	6422.69	8898.89
15229	551.177	551.173	551.178	353.167	352.654	353.785	42	42	1.17231e+06	1.13042e+06	1.17049e+06	1.07009e+06	1.04026e+06	1.12719e+06	1.09027e+06	1.05162e+06	1.17071e+06	1.04823e+06	1.08392e+06	1.14796e+06	1.28145e+06	1.22023e+06	1.2373e+06	1.31451e+06	1.31863e+06	1.3298e+06	1.28873e+06	1.26924e+06	1.25735e+06	736444	766300	806412	770357	804882	855085	720847	744075	824405	780486	807933	889826	902995	880786	873520	978956	977670	966267	1.2239e+06	1.19612e+06
16259	594.018	594.018	594.02	276.693	275.361	277.659	10	10	0	0	0	0	0	0	0	0	0	0	0	0	0	0	0	4249.91	5478.41	6607.52	9005.97	6780.98	7082.71	0	0	0	0	0	0	0	0	0	0	0	0	0	0	0	17932	21086.3	21377.5	40072.3	37634.5
19337	759.246	759.238	759.248	303.385	302.46	303.658	5	5	0	0	0	3953.35	770.547	831.309	2502.93	2349.03	4057.16	2363.11	3154.65	3202.47	1566.07	800.625	735.109	6150.33	5375.68	7011.49	6126.12	6608.81	6032.02	0	0	0	769.502	0	0	0	708.103	0	865.163	719.446	0	710.716	685.463	3093.53	5423.72	3980	4691.8	8146.8	7246.58
19789	789.261	789.255	789.262	352.467	351.973	353.127	42	42	1.33358e+06	1.12824e+06	1.10972e+06	1.14205e+06	1.07436e+06	1.04371e+06	1.14093e+06	1.03727e+06	1.07134e+06	1.14537e+06	1.02468e+06	1.05539e+06	1.17807e+06	1.18272e+06	1.19599e+06	1.21857e+06	1.28321e+06	1.33257e+06	1.48267e+06	1.36362e+06	1.32294e+06	750770	704061	719595	767753	739349	746569	719701	682247	709558	759142	749784	763878	804438	834172	865115	903011	922410	936124	1.34271e+06	1.3012e+06
20218	811.304	811.3	811.305	264.402	264.022	264.59	10	10	0	0	0	700.946	0	706.942	0	0	685.813	2370.24	1813	2991.37	782.499	2461.4	0	10620.2	10665.2	10445.6	11681.9	11534.8	11046	0	0	0	0	0	0	0	0	0	0	0	0	0	0	880.569	2978.73	4359.27	2784.11	5967.46	7107.51
5512	270.044	270.044	270.045	164.617	162.652	166.489	11	11	0	0	0	0	0	0	0	0	0	0	0	0	0	0	0	697.621	706.943	0	1552.52	1030.32	0	1516.24	2432.71	3292.06	1758.38	2491.73	2563.31	4687.27	3881.39	4456.21	3564.75	3368.08	3825.68	3773.08	4861.58	6944.09	6787	7927.39	8846.99	13513.7	12004.1
8773	345.11	345.109	345.133	274.59	273.916	276.104	11	11	0	0	0	695.467	0	0	0	0	0	810.289	698.066	1652.64	4860.52	5873.88	3524.77	5606.18	6676.66	8516.61	11040	5290.82	10098.7	0	0	0	0	0	0	756.988	0	0	0	0	2318.52	856.493	2349.44	3265.01	5181.1	5045.02	5883.48	10337.4	13277.2
8811	346.114	346.112	346.115	205.182	204.527	205.959	41	41	15632.6	13884.9	13719	16872.3	14161.6	15954.5	16445.1	15199	15334.3	22548.3	19357.5	20822.6	19077.7	18309.1	16777.3	36606.4	37223.9	36879.1	51242.4	44653.2	43249.8	12436	11405.9	12107.7	13511.5	11258.4	12299.9	14548.8	13685.8	15816	15132.4	13362	15568.8	18068.3	16365.3	15148.6	26434.9	27489.4	27328	51216.4	42698.7
8911	349.054	349.053	349.057	227.92	226.671	228.695	19	19	2738.07	1565.66	2299.44	3204.59	950.229	3451.63	2700.44	3246.05	3256.23	7824.42	2234.59	5162.88	1849.09	3671.08	4337.65	13751.6	15969.1	16401.3	16078.5	18738.9	17230.4	1711.43	1527.36	744.911	0	0	0	2866.22	2202.65	955.683	2267.31	2344.95	757.213	3981.92	3268.22	3935.62	9675.53	8305.03	10230.7	17996.4	16412.8
11148	407.192	407.189	407.193	347.665	347.002	348.12	42	42	56506.6	55155.6	56153.2	59125.2	48420.4	51676.8	39684.4	38198.9	45965.9	48579.2	50687.3	52843.7	68544.2	56126.6	54421.7	63396.8	67191.7	74869.4	52561.8	50695.7	49539	49596.8	49430.5	52555.5	58985.9	56686	60414.5	52627.3	58257.7	58643	43225.6	46882	48740.8	60475.7	58000.9	61646.2	61068.1	61227.2	62886.2	76223.9	77322.9
11272	411.094	411.092	411.103	227.314	226.301	232.607	37	37	7469.5	5760.22	7878.95	6948.09	7084.11	7959.36	7593.11	7683.26	9803.23	9078.65	11029.5	9641.69	6197.76	7204.91	7870.88	17706.2	18078.7	19920.9	5702.18	9170.76	7814.03	3373.08	5044.31	3397.57	4557.94	4818.86	4971.72	6492.34	7437.15	7188.17	4912.63	6913.07	7486.5	6159.47	8727.26	5355.93	10542.5	9230.61	14740.7	17342.2	21744.2
13977	503.141	503.141	503.143	138.926	137.923	142.094	5	5	0	0	0	0	744.914	0	0	0	1435.81	3089.06	0	846.387	681.476	0	0	6637.27	6237.98	5914.89	0	729.082	684.985	0	0	0	0	0	0	1623.01	0	788.55	1521.43	0	0	1408.9	754.42	0	3140.23	4450.47	4084.32	8369.85	9068.19
16861	627.191	627.189	627.193	274.891	274.04	275.622	6	6	0	0	0	0	0	0	0	0	0	0	0	0	0	0	0	0	0	728.782	0	0	0	0	0	0	0	0	0	0	0	0	0	0	0	0	0	0	4460.29	3978.53	5741.42	10046.3	8952.05
18839	735.21	735.206	735.213	336.225	335.733	337.144	42	42	11079.6	15009.8	15429.2	14917	13775.7	15995.2	16852.1	16099	19975.2	17233.1	18887.6	21207.2	21411	21570	21131.2	21294.7	22273.7	24271.1	20714.8	20559.2	20876.7	10045.3	13255	14949.9	13097.8	14733.4	15835.1	13271.7	14747.5	17358.8	14921.1	16364.6	17554.1	16868.7	17460.9	19444.2	17891.7	17298	18790.9	32430.2	32478.4
22490	1029.34	1029.33	1029.34	211.348	210.596	212.064	21	21	0	0	0	0	0	0	0	0	722.42	679.399	1543.82	1635.5	2094.69	719.066	2628.11	3728.81	2738.36	3553.6	2899.99	3286.93	1691.78	3462.6	3144.59	3161.19	4213.46	3855.99	4727.55	2523.82	3729.95	4920.18	5999.84	5487.24	6441.75	5327.14	5657.88	6441.03	6615.41	9301.72	7303.45	12832.8	15159.6
3933	221.045	221.045	221.046	277.365	276.237	278.003	30	30	33170.6	21679.9	18862.3	24900.3	16714.7	17282.1	23790.4	17474	17610.4	24960	18541.9	7295.04	11816.1	12149.3	16098.5	33965.7	28944.7	26739.8	41026.8	34033	35246.3	30778.1	33759.4	33292.9	34601.4	33445	37132.9	32630	35573.1	38451	33974.9	34668.1	38124.6	44237.2	42990.5	49139.5	70020.8	78782	80393	121729	118223
4835	251.057	251.055	251.067	209.514	204.23	214.251	24	21	698.815	0	0	0	0	0	0	0	0	0	0	0	0	0	715.723	7415.58	5977.52	9969.46	3746.55	20808.3	20614.3	3325.57	708.237	3110.82	1724.02	1856.8	3230.94	3195.69	7367.64	6377.33	4717.58	4579.09	7513.7	7162.07	6342.55	7711.68	18883.4	19325.2	21176.4	28941.7	32535.1
5485	269.102	269.087	269.104	260.923	253.163	262.213	30	30	5480.63	5776.64	5567.73	9523.92	7375.03	8448.09	7098.19	6170.48	10837.5	10028	10840.7	11341.1	5808.83	6035.31	5448.08	15134.3	9897.05	18158.4	26698.9	4340.19	10305.7	6479.36	5387.9	8138.34	4581.39	9009.88	8386.5	8374.63	11494	9052.99	8021.68	8003.92	6239.37	5743.57	7855.04	6449.13	8076.2	15006.1	18423	12029.4	17401
7159	309.171	309.17	309.171	521.62	520.699	522.647	41	41	123123	111265	109074	115864	115688	109096	105598	108305	119174	117321	116610	127972	126326	140844	143474	137583	144564	145316	150131	141102	134338	110688	114265	108542	128638	115870	118825	106459	101738	94591.7	121823	124506	123495	125918	114569	130687	139548	144550	145571	176075	170651
9102	353.16	353.158	353.162	446.46	445.231	447.954	30	30	6622.61	3311.76	6178.72	4895.04	4151.6	5970.44	6570.66	7253.69	8300.51	6872.46	7136.03	7503.1	10202.5	10309.6	8760.99	9452.54	10176.9	7439.51	11126.6	11270.4	10181.1	1018.81	3301.65	5546.67	5343.43	3502.26	5592.48	3615.98	2423.49	1426.88	5271.06	4352.44	5822.39	5830.91	6601.67	6962.16	8428.6	9874.9	9629.8	15905.6	17849.6
11686	423.187	423.185	423.188	249.039	248.413	249.559	42	42	78645.5	72598.3	77368.6	82823.6	88748	91234.7	86685.2	84045.6	90841.8	108949	118768	125488	107257	101967	105022	200274	204847	212841	187051	186226	182210	53568.8	57604.3	52190.6	59185.9	58623.5	59972.3	71627.2	71173.5	73129.1	72265.6	70907.5	76427.9	84284.3	76463.7	78716.8	118317	111867	120761	153440	149651
13570	487.125	487.122	487.125	343.092	342.225	343.888	42	42	24559.6	24878	26786.3	22177.3	25554.4	24336.5	24803.8	23346.7	24310.9	27353.7	26897.3	31037.5	33526	31748.9	34486	39017.9	37966.1	41524.9	55605.5	54827.3	51065.4	37464.2	41587.4	43692.9	43663.7	41648	47327.8	40715.6	42845.8	45902.7	50642.8	50960.8	50736.3	56715.3	54682.8	52937.8	68998.3	66168.1	67539.7	107857	99020.3
13661	491.156	491.152	491.156	353.281	352.344	354.149	42	42	44588.4	44407.6	46158.1	43888.8	40494.9	45413.7	37914.9	41181.1	47766.4	45039.1	43706.8	45766.6	48175.7	46312.5	48394.2	51591.4	54632	61035.9	49628	47751.9	47898.9	31168.4	36522.4	37843.5	31878.8	36510.8	42580.1	28647.8	34855.9	39729.4	28376.1	38182	39612	40955	34302.8	42175.4	47584	45655.2	44556.7	53247.4	50028.8
13662	491.156	491.152	491.157	366.401	366.064	367.219	14	14	26063.1	24497.8	23770.7	22763.2	21752.1	21665.1	23352.3	21816.4	21124.3	22240.1	21899.3	22038.2	23238.8	26327.5	25006.1	26243.7	25666.7	26828.2	21660.9	22430.1	21614.9	19697.6	19639.3	21054	18978.2	19488.5	21543.9	18346.6	19298.7	21855.5	18798.8	19321.2	23191.9	23348.6	21740.2	22074.1	23875.3	21541.8	23538.1	30961.1	30280.3
14313	517.226	517.223	517.227	289.262	286.947	292.394	9	6	0	688.657	0	0	0	0	771.255	0	704.826	1629.77	2463.7	1778.25	3412.86	1807.33	1662.72	8380.99	5862.18	9007.37	6280.8	8438.56	3773.88	0	0	688.742	0	0	0	0	829.414	0	0	738.965	693.605	1633.48	1681.5	0	3361.93	3380.43	3468.42	4699.94	4816.24
16153	588.897	588.895	588.9	29.4691	29.1598	30.155	7	7	220070	184147	200218	196325	171796	182045	191110	176241	200030	184080	184000	204677	234915	224721	232081	330851	358008	385285	447264	414636	439722	166556	170572	183447	162997	172907	176488	152607	157646	162174	186551	189879	199403	232953	238966	242963	316126	321874	329089	513075	505611
22293	993.293	993.289	993.295	184.347	183.147	186.39	19	19	0	0	714.227	0	702.503	0	0	0	0	1830.45	4740.41	3670.8	4060.54	2137.29	2980.21	17042	23204	26328.6	36743.1	32804.4	30990.1	0	0	0	677.742	0	769.352	1590.26	708.202	1421.8	1473.08	3022.93	3604.56	6740.37	5524.22	5627.19	17417.5	20327.8	27866.9	47173.9	49492.2
23157	1125.34	1125.33	1125.34	182.089	177.927	182.992	18	14	0	0	0	0	0	0	0	0	0	0	0	0	1507.17	2220.44	839.425	36922	32381	33995.7	24733.3	56128.4	25495.7	0	0	0	0	0	0	0	0	0	0	0	0	11315.4	4539.8	9966.71	42954.9	15590.9	15013.6	85259.7	81370
4480	239.053	239.052	239.055	273.018	271.236	274.501	15	15	5382.61	3907.97	2495.79	3374.85	2644.84	3407	4320.01	3505.5	5271.45	4804.75	2743.24	4276.66	4512.67	3305.09	0	5007.71	5731.89	5530.32	4782.16	5465.19	4496.89	4174.64	3382.54	4730.42	3800.33	4302.2	3009.3	5861.12	6599.18	3854.64	3039.1	4414.4	2291.98	3641.01	2366.69	2293.05	5682.91	3130.84	6839.24	6638.83	6087.44
9543	365.052	365.05	365.052	166.999	162.066	171.539	21	20	2321.65	0	0	0	0	0	0	0	0	0	0	830.512	0	0	0	0	1544.99	3144.99	0	0	0	40763.3	39268.8	40235.2	36968.8	39975.2	38940.3	36308.3	49535.6	49338.3	44149	43797.7	42166.9	36764.4	39179.4	29711.4	56762.2	50644.6	59282.1	54097.1	58220.9
10692	393.935	393.934	393.936	270.795	269.763	271.275	5	5	0	0	0	0	0	0	0	0	0	0	0	0	0	0	0	7185.54	3465.96	4457.37	0	702.015	1659.83	0	0	0	0	0	0	0	0	0	0	0	0	0	0	0	7639.22	4968.23	6474.15	6289.59	7142.22
3943	221.082	221.08	221.084	272.833	271.162	273.538	7	7	0	0	0	0	0	0	0	0	0	1443.63	0	0	0	0	0	7332.45	6547.78	6219.54	3240.33	4458.73	4842.69	0	0	0	0	0	689.149	0	0	0	0	0	0	0	0	0	5790.87	6237.57	6003.31	7365.69	6338.69
5416	267.054	267.053	267.055	67.875	65.8275	70.4352	28	28	44939.3	53142.8	75274.4	40870.6	57443.7	80513.7	69251.8	78398.4	84712.8	67897.5	131428	113715	60391	46577	28416.7	23892.4	25425.3	13421.4	20235	16041.1	19239.2	41065	37791.7	66889.8	28406.7	49829.8	39040	45689.1	101939	93017.5	32702.5	75181.8	56702.3	43656.3	25257.5	41743.4	121906	109823	115026	79647.7	83706.8
11906	431.098	431.096	431.1	266.821	266.275	267.821	30	30	10055.8	11853.5	9571.86	10116.5	9179.2	10285.1	7709.63	9805.49	10914.8	8768.04	10415.2	10836.8	9645.88	9002.58	10245	11036.4	11288.2	10958.3	5951.09	5934.06	6333.96	6554.59	8134.35	8621.27	7202.94	7948.67	9638.87	6776.85	6304.17	8974.34	6420.49	6865.43	7727.77	7673.23	6396.8	5904.82	8539.94	9106.35	11356.3	7518.61	9413.09
16513	607.167	607.163	607.169	271.247	270.357	271.895	38	38	5423.57	5368.78	3992.67	5207.32	3559.41	5248.04	4909.44	3762.77	4969.85	4789.35	3839.64	6593.3	6537.33	4710.55	6626.49	8338.03	5937.39	6607.99	2601.04	3027.35	3672.16	10456	8659.23	8949.56	8641.97	9171.84	9274.8	8116.64	7834.29	8445.65	8912.68	7768.99	9861.86	8551.77	9013.72	7842.33	11558.2	9466.83	10549	8635.01	12309
4650	245.065	245.06	245.078	68.8335	60.3002	70.9356	21	19	10000.2	4929.71	7205.67	3930.17	5199.78	4301.09	5464.61	4507.57	5508.36	3708.28	7896.96	8145.27	3672.67	4524.46	3189.25	5388.76	2471.65	5126.6	0	0	0	6143.06	7227.69	4830.39	2319.58	3184.66	1748.23	4916.99	7638.44	4232.51	4048.31	3706.69	3542.69	6802.37	3492.85	5650.1	24462.5	15167	14346.1	10657.1	9258.69
9630	367.062	367.061	367.064	138.467	137.952	139.545	16	16	12032.4	14348.2	16023.7	14928.3	15352.1	14266.5	16143.1	18175.9	14527.7	20448	20694	23942.4	16008.9	16585.1	18098	4462.22	4803.99	6002.8	0	0	0	9545.52	11516.5	12518.8	8739	9464.81	10275.4	13441	16457.7	17045.7	11774.4	13958.9	15915.1	13349.7	11805.8	10012.3	26697.6	24486.1	23911.3	18348.1	22288.1
11500	417.989	417.987	417.99	209.003	207.992	209.969	42	42	36442.7	28877.6	32283.7	26575.2	25110.2	24480	17481.2	15949	21280.7	24487.1	26533.4	34430.7	32151	21056.1	20074	51555.4	44414.5	42289.9	42358.5	48938.3	43415.3	38302.1	50191.7	53376.3	22252	35781.2	34697.9	27388.8	35395.6	25990.7	27825.6	30440.4	31189.8	39771.1	35580.4	46359.7	60735.2	39701.7	43815.5	51444.6	51944.6
11690	423.223	423.222	423.224	330.555	329.971	331.164	33	33	21776.6	18831.3	21614.1	20170.2	18995.8	23096.6	17799.3	18159.1	19583.2	22747.6	21954.4	25985.2	31285	27629.8	25973.6	28789.6	27615.7	26228.2	11073.6	11335.5	9253.2	12559.9	13171.7	13842.3	12412.8	14348.8	12930.1	9059.22	12107.6	12710	8934.73	16076.2	14792.9	14621.1	14546.1	14705.2	16126.9	18602.1	17498.9	15122.3	15617
12182	439.143	439.141	439.146	345.995	343.313	349.093	16	16	0	0	0	0	0	0	4425.27	4223.26	4919.86	7127.3	8477.03	12053	918.724	0	695.304	9564.13	8670.33	7892.23	13548.4	11236.5	12643	2170.46	1573.11	1802.88	681.657	0	0	804.573	686.109	849.617	2452.13	3307.39	2600.42	10544.9	6963.61	8940.63	22295.6	23480.1	24866.7	15680.7	15448.1
14070	507.152	507.15	507.154	234.051	231.769	234.741	13	13	3861.48	2110.37	1640.34	4874.02	4307.78	6248.54	8658.9	10709.9	2476.66	15350.2	6234.96	10728.6	31319.3	28911.6	24866.9	68109.7	65972.1	69220.1	46553.4	29218.9	47091.3	3018.05	2767.15	3909.36	5035.82	6409.57	10357.5	8378.43	5759.45	11638.9	9381.35	7704	18680.8	35276.9	33979.3	32756.1	84246.9	84277.1	86153	71366.5	73894.3
14476	523.168	523.167	523.169	134.661	134.234	135.572	9	9	0	0	0	0	0	0	0	0	0	0	0	0	0	0	0	6049.49	5009.75	5384.09	2917.22	778.841	3263.08	0	0	0	0	0	0	0	0	0	0	0	0	0	0	0	14137.8	13723.9	14887.3	8925.17	6790.23
14959	541.251	541.249	541.258	266.645	263.387	273.394	21	19	7780.37	8752.11	12401.5	7065.61	5056.02	7055.75	3136.82	6299.53	5917.1	4015.74	11641.7	10429.5	10545.1	7644.41	9768.73	18610.5	19520.8	15124.3	11461.7	10740.6	11537	2309.34	3926.41	5418.17	3010.35	3088.05	5117.7	6314.22	3581.57	4858.09	6441.57	5703.61	6151.97	6863.47	7205.86	4549.13	14033.4	11502.9	11427.8	9567.14	10875.4
15395	557.128	557.126	557.131	302.95	301.84	303.52	7	7	0	0	0	0	0	0	0	0	0	0	0	0	0	0	0	4439.23	2344.53	1622.81	721.054	3316.97	2695.75	2613.42	2503.32	2509.48	0	0	690.115	721.4	729.661	2186.21	717.849	876.469	2369.26	2410.16	2448.42	3257.21	7321.53	7693.91	7704.11	7612.93	9419.45
16717	619.97	619.969	619.973	56.1409	52.6157	58.4884	10	9	0	0	0	0	0	0	0	0	0	0	0	0	0	0	0	13894.9	13146.1	15905.5	0	0	0	0	0	0	0	0	0	0	0	0	0	0	0	9040.29	8066.78	1715.17	106727	106550	93659.4	131258	50204.9
18919	739.21	739.204	739.21	215.707	215.395	216.796	42	42	1.70255e+06	1.62681e+06	1.68305e+06	1.63776e+06	1.59172e+06	1.66266e+06	1.68809e+06	1.63414e+06	1.74411e+06	1.71593e+06	1.73418e+06	1.85813e+06	2.06475e+06	1.91676e+06	1.92863e+06	2.09661e+06	2.03757e+06	2.06384e+06	1.35352e+06	1.33193e+06	1.30492e+06	1.59408e+06	1.6105e+06	1.6923e+06	1.64279e+06	1.71305e+06	1.75787e+06	1.57056e+06	1.63729e+06	1.68045e+06	1.68128e+06	1.74098e+06	1.80405e+06	1.69536e+06	1.57893e+06	1.66156e+06	2.02604e+06	1.97132e+06	1.96219e+06	1.81643e+06	1.80382e+06
6984	305.125	305.123	305.125	209.265	207.625	210.153	5	5	2290.12	986.872	2415.75	4583.68	2427.76	3393.5	3240.99	3012.39	2340.55	3367.25	4357.83	3062.92	0	0	1450.11	5416.93	5085.7	5086.75	3193.95	2335.05	1539.46	1027.95	1864.12	1629.11	0	687.954	707.746	799.321	0	1373.26	1707.55	707.222	3266.37	1588.78	0	714.808	2172.05	2363.97	4243.77	3143.97	4669.47
7826	324.965	324.963	324.989	170.752	165.019	172.704	7	7	2946.88	737.647	1520.76	1525.92	0	1619.02	1559.22	1603.5	2286.83	6201.78	3396.41	2443.7	3345.42	2645.42	3215.11	8694.1	10507.6	8696.3	15103.7	14855.5	13299.4	3975.99	2172.27	3143.52	2481.98	2498.8	2899.88	4895.37	4584.59	4845.35	3196.64	4740.36	3542.81	5973.52	4751.14	3087.56	8168.79	9214.57	4864.33	6377.28	5501.51
9939	375.067	375.066	375.07	135.092	133.299	135.832	9	9	3236.27	4951.52	4073	3371.55	2985.02	4352.76	4067.92	4820.68	6239.39	3620.47	4547.57	6186.69	4331.77	5020.19	5018.25	1994.92	3138.84	2878.64	864.083	726.676	1495.84	2235.32	2687.81	2867.79	2246.8	718.582	2491.14	2569.17	2177.46	975.226	2002.13	1587.76	3581.85	2277.04	0	2221.69	4197.54	2955.02	2375.67	1770.64	4216.58
10044	377.181	377.179	377.184	402.471	401.866	403.747	17	17	6811.01	6282.14	8460.95	10268.2	6931.22	7633.55	8542.46	7979.6	8440.89	6581.63	5798.26	6508.89	11144	9126.12	9072.16	9917.55	8802.33	10741.5	5361.39	6334.43	4553.25	6758.54	3267.8	7683.16	2425.23	3312	4286.19	3904.16	1496.83	5908.71	5827.66	4395.45	5418.27	3732.95	3419.48	6372.05	4501.32	5890.34	7481.03	7694.9	4956
10090	379.07	379.053	379.082	58.9113	55.6193	60.3596	25	23	3.61579e+06	3.91982e+06	1.66477e+06	2.55287e+06	2.95417e+06	1.5301e+06	59664.2	40625.9	60481.1	13133.5	44028.3	37441.5	28565.5	24308.8	9617.02	796027	847341	865138	6982.77	10636.7	14427.6	8.48669e+06	5.37712e+06	3.36423e+06	6.26901e+06	4.70905e+06	6.55154e+06	416840	390684	457370	34276.5	52959.2	26335	255877	270537	279280	5.89297e+06	6.12314e+06	6.05938e+06	4.77416e+06	6.9303e+06
11408	415.147	415.144	415.164	373.2	372.892	377.31	10	10	8045.43	9047.87	7172.21	3146.84	2833.89	6214.01	0	0	0	0	0	0	0	0	0	0	0	0	0	0	0	3396.37	2864.84	3564.42	0	785.225	693.059	0	0	0	0	0	0	0	0	0	11778.2	0	12679.3	0	4315.91
16426	602.008	602.004	602.016	270.172	268.179	272.942	9	9	1580.64	1623.62	3181.03	2407.09	2346.25	3375.06	0	1612.47	1527.26	709.088	0	687.008	0	0	0	3492.7	2956.37	3943.35	735.106	0	0	2243.72	4697.84	3987.9	2399.97	2273.42	2581.14	688.266	3987.06	2404.77	0	818.065	0	0	0	738.506	9200.14	9406.62	8967.58	3628.28	9621.86
17232	649.878	649.868	649.892	50.427	49.4037	54.6231	6	5	0	0	728.196	0	690.079	0	0	0	0	701.293	0	0	0	1433.15	0	7551.93	6512.74	6411.13	5273.18	7194.85	7797	725.538	2089.92	0	814.975	0	1541.97	0	0	693.546	0	710.168	935.683	0	2621.8	1566.88	8718.74	7629.74	9293.05	8342.5	10401
17858	685.292	685.288	685.293	338.869	334.18	342.022	89	42	54927.5	53283.5	55110.7	62716.1	92083.7	143352	89266	93950.1	93971	65325.9	96383.4	114989	86303.7	129416	76796.2	142460	106207	159198	125545	179477	112007	37439.8	42221.1	72717.1	37521.5	74717.4	62866.2	40419.5	77291.2	64979.1	44739.1	49916.7	72781.8	78719.5	51469.4	48425.1	89688	91965.5	104412	123798	107870
18827	734.885	734.882	734.891	52.6157	51.8681	57.3839	5	5	0	0	0	0	0	0	0	0	0	0	0	0	0	0	0	2413.87	6084.51	2320.25	0	0	0	0	0	0	0	0	0	0	0	0	0	0	0	4233.55	1534.11	2508.72	34246.2	19680.2	22315.7	36301.4	25225.3
23023	1097.01	1097	1097.03	57.6319	56.6593	58.4455	6	6	0	0	0	0	0	0	0	0	0	0	0	0	0	708.856	0	0	0	0	0	0	0	0	0	0	0	0	0	0	0	0	0	0	0	0	0	0	22165.3	24970.7	24180	30889.3	28846.8
7348	313.017	313.004	313.019	143.28	137.594	144.067	25	25	17696.3	10185	10263.1	17674.8	12276.3	10355.2	7310.04	4685.1	6908.32	13508.3	10301.2	8785.91	7764.89	10491.3	7763.23	10886.5	8678.1	6465.76	4347.88	3069.6	3990.06	14110.1	9704.6	9559.98	16134.2	10284.4	10212.1	11983.8	9819.98	8165.07	8132.16	10777.2	8467.87	10526.7	9623.32	9230.54	12896.8	10896.5	11647.4	14760.8	11637.8
11440	416.171	416.17	416.173	162.046	161.039	163.143	5	5	0	0	0	0	0	0	0	0	0	0	0	0	0	0	0	0	0	0	0	0	0	0	0	0	0	0	0	0	0	0	0	0	0	0	0	0	10489.7	9947.11	7497.61	7470.15	7665.29
12356	445.094	445.083	445.096	216.634	215.395	222.482	40	37	5106.08	3051.95	4814.64	4385.51	4517.89	3272.57	4039.07	2959.82	4742.91	8988.44	8301.78	9563.5	11002.3	10166.5	9947.58	28542.9	25875	27846.2	24142	25698.1	21699.4	3761.35	5540.02	3672.36	4483.42	4352.5	5917.32	7346.79	6211.02	5202.2	4705.58	7376.42	6978.74	10725.6	9221.01	9289.83	22935.6	24810.6	21629	26615.3	26034.9
15631	566.029	566.028	566.03	269.437	268.795	270.423	7	7	0	0	0	0	0	0	0	0	0	0	0	0	0	0	0	3416.32	7331.36	4823.46	0	726.389	749.527	960.063	1506.55	726.489	0	1395.8	0	0	798.168	0	1562.44	2310.47	740.846	881.787	733.486	0	9360.36	7611.06	9541.41	8866.31	9358.76
23206	1134.96	1134.96	1134.96	56.6129	54.981	58.282	6	6	0	0	0	0	0	0	0	0	0	0	0	0	0	0	0	0	0	0	0	0	0	0	0	0	0	0	0	0	0	0	0	0	0	0	0	0	26920.9	26240.6	22934.1	13854.7	15643.6
12799	459.128	459.126	459.13	337.548	336.199	338.2	24	24	1655.81	3372.67	4494.04	725.692	0	721.761	0	0	0	0	0	0	0	0	730.423	807.299	1430.47	3085.03	1540.13	2705.13	1444.15	7809.2	8460.61	14849.4	6513.65	9545.95	9489.86	5145.67	5677.41	7607.02	5551.37	4473.68	5950.18	7173.86	5474.43	8324.23	5074.72	6770.29	7973.66	11980.6	14124.7
10931	401.088	401.085	401.088	429.642	429.318	430.159	42	42	175416	169335	169754	197371	157547	180296	136724	136892	149742	163767	161379	181051	149723	118688	111862	129917	139834	138336	179900	170903	168389	171358	171341	185756	153359	154920	153466	118681	123022	133758	118676	125829	132322	132270	132257	135900	131140	129787	132749	219780	214951
13618	489.149	489.145	489.151	279.148	277.996	279.804	12	12	2576.48	4968.61	3887.72	3605.11	3741.11	5620.45	0	1838.37	2281.92	2599.47	1497.57	2571.1	686.204	754.782	2616.64	12504.5	12637.9	12351.5	9241.97	10016.3	9879.19	10517.7	11575.8	9946.78	9025.55	10939	12799.1	4882.58	3088.59	5300.94	2942.83	1481.46	1082.32	1725.01	3021.3	4347.29	7469.57	8195.08	7658.51	10333	13632.9
20302	817.257	817.254	817.259	408.521	408.234	408.921	5	5	0	0	0	0	0	0	0	0	0	0	0	0	0	0	0	0	0	0	11129.7	11258.5	9832.52	0	0	0	0	0	0	0	0	0	0	0	0	0	0	0	0	0	0	15970.7	13058.7
11912	431.12	431.116	431.12	189.921	189.514	190.464	35	35	37886.9	27150.8	29308.1	30541.6	30808.8	30008.1	28022.8	28931.2	29536.3	34201	32594.2	34559.8	30054.6	26652	24738.7	25008.1	22494.2	21291.6	0	0	0	23539.5	24216.8	24434	25377.8	21995.8	24376.4	27412.9	30930.6	30840.5	23862.5	25998.4	24403.3	23444.9	21498.2	22353.7	6883.43	39817.1	3589.27	32830	30421
7251	311.112	311.091	311.115	261.052	259.374	265.155	35	31	4335.48	2711.69	7032.46	4693.38	5189.57	6070.8	5211.41	5521.35	4190.78	6400.82	6171.57	8164.78	3639.73	2215.92	5466.35	8491.55	10512.4	7144.75	6429.78	5955.21	4883.3	5839.08	5046.43	4763.1	5800.99	4411.52	5530.2	3525.73	6522.57	4358.37	5982.23	5920.45	4685	6986.79	7534.24	5949.66	5840.58	9025.01	8984.7	22205.8	19499.6
4482	239.06	239.059	239.062	479.51	478.568	480.501	34	34	7394.6	7650.28	19733.4	4086.8	10686.6	14909.7	6656.05	21057.1	47068.5	13225.2	15740.5	32034.7	14497.9	16240.1	22320.3	12323.7	12429.1	13415.3	46099.1	40377.1	44242.8	11746.2	19710.8	34527.4	13520.9	12353.2	24628.2	10718.3	18213.6	31955.4	13147.1	22149.6	37237.1	7891.08	14308.2	14822.2	9784.3	10065.8	17083.4	38119.4	37673.5
7504	317.085	317.084	317.087	136.671	135.248	137.506	31	31	20834.3	16077.7	17713.8	16294	14179.6	11704.3	14512.4	11063.3	15899.7	17439.6	13054	15653.6	5621.31	5410.52	5712.11	8893.91	10552.1	10373.7	2507.08	5629.68	4083.57	19530.7	17166.4	17670.8	13166.6	13305.7	15551.2	14308.4	18277.4	16954.1	13376	13559.4	15327.5	11186.2	7174.15	11204.8	8208.15	11312.5	21197	67555.7	7934.13
9891	373.129	373.128	373.129	343.636	343.127	344.005	11	11	15502.5	10415.6	13518.2	13566.7	8851.19	11219.1	7624.11	7901.97	9288.62	5687.41	3612.78	7110.62	6033.83	3637.14	4112.27	12073.9	13917.8	13916	21360.4	21012.1	24305.7	5827.2	16234.3	4615.82	13169	12532.8	6140.36	5574.52	10898	10449.4	10753.2	10662.9	9415.91	11604.1	10104.3	10842.2	20394.3	15742.3	15762.8	46024.2	44938.9
13785	496.141	496.14	496.145	291.59	291.298	292.572	6	6	0	0	0	0	0	0	0	0	0	0	0	0	0	0	0	0	0	1578.02	10381.9	7523.05	8295.03	0	0	0	0	0	0	0	0	0	0	0	0	0	0	0	0	0	747.741	5722.7	5897.5
23417	1257.38	1257.38	1257.38	182.129	181.461	182.47	5	5	0	0	0	0	0	0	0	0	0	0	0	0	0	0	0	1714.69	2270.66	751.188	11027.8	9681.13	10365.9	0	0	0	0	0	0	0	0	0	0	0	0	0	0	0	2873.66	2217.97	1405.13	14134.9	16124.4
14413	521.166	521.162	521.167	365.601	364.649	366.715	42	42	62467.4	53664	56131.7	54683.2	47140.1	54222.2	56553.5	49201.6	55241.3	49703.7	52020.8	55218.2	57656.6	56714.1	61332.8	60816.9	60703.7	65436.6	69589.9	62188.8	63187	50396.5	54304.3	54126.9	52897.9	55206.3	56561.7	52362.9	46289.8	47773.4	53967.6	53542.6	50905.5	53310.7	57313.8	60342.9	58122.4	52347.2	61997.1	87543.1	88830.9
14443	522.17	522.167	522.171	350.583	349.422	351.793	25	25	16819.6	11567.1	19295.3	14790.9	18612.4	17678.1	17814.4	16165.4	18505.5	17699	16275.5	18245.5	23155.4	20332.1	21612	24207.3	22816.9	24966.7	25730.4	22594.5	23747.1	20074.2	16102.8	21003.5	13862.7	15059.3	16616.3	14275.6	13657.6	15086.9	14467.2	15553.8	17461.2	18794.3	19387.5	19550.3	16420.6	22457.1	18888.7	27968.9	29919.6
4939	255.085	255.084	255.086	251.892	251.591	252.859	40	40	35738.8	30878.6	35459.5	51079.1	44500.2	47978.3	33714	29049.2	35089.1	41358	39769.2	49501.9	29399.7	28248.3	27558	34442.7	37677.4	40374.9	45576.3	50959.1	46634.1	45420.2	44777.4	51156.4	34169.9	36623.7	36512.6	32754.5	32386.3	32228	26852.4	31519.5	35295.7	34730.3	30865.8	33785.8	39519.9	40634.2	39639	59462.9	66815
6467	293.124	293.123	293.125	208.679	208.112	209.109	42	42	352093	337128	345109	413104	374544	376460	249231	270349	290871	340835	339811	371190	315641	268890	268990	261826	286508	309884	385503	377741	366186	379516	365917	402374	349950	361000	376632	290489	295623	296249	279374	273408	295214	330761	332893	352752	291821	295084	301906	419443	414761
7691	322.093	322.091	322.093	161.589	161.056	162.693	23	23	13363.3	12251.3	14389.1	12710	11462.5	12950.1	15091.9	13515.9	14521.2	4609.64	7145.59	7363.13	0	0	844.447	0	0	0	0	0	0	12721.7	11037.7	11252.1	12911.6	10376.9	12284.4	13117.6	14091.2	13926	7503.53	10179.9	7433.51	9612.58	11527.1	3854.98	16005.8	14097	16169.8	31056	29122.9
7793	324.109	324.108	324.11	199.988	199.792	200.505	5	5	0	0	0	0	0	0	0	0	0	0	0	0	0	0	0	2309.03	1002.23	840.988	5217.04	4204.37	4939.53	0	0	0	0	0	0	0	0	0	0	0	0	0	0	0	0	0	711.355	6417.1	3622.76
8564	340.126	340.125	340.127	111.485	110.165	114.453	41	41	30115.3	23208.1	28509.2	23991.6	25004.2	25056.9	26540.7	27906.3	26269.7	30136.2	34164.3	35371.9	28371.4	26790	26820.8	51289.3	59618.1	52741.7	42404.1	39719.8	41375.8	20268.1	23628.4	20801.7	18455.6	20805.8	20089.3	20025.3	26231.2	32059	26267	26439.5	29577.2	14134.4	15926.2	15147.4	15576.8	18561.4	15971.3	29946.4	29298.7
8637	341.98	341.958	341.982	69.9154	68.8942	72.0943	21	21	14299.5	9781.15	8320.35	11230.3	9443.92	3571.45	8519.88	9365.98	6470.16	7562.44	7387.06	4929.39	4742.9	8816.77	10303.9	7759.31	4200.5	8339.36	2899.04	1739.85	5179.58	6327.68	5683.12	5665.58	8286.97	4269.44	10217.5	9243.84	9655.7	14052.6	10039.6	5401.6	13540.7	5362.51	10522.9	9724.87	9633	5691.92	9208.82	8929.95	13070.9
9275	357.117	357.116	357.117	195.209	194.412	195.374	5	5	6891.51	8903.11	12175.1	13187.1	10638.3	14900.6	5822.89	8076.59	12230.2	10456.5	9076.14	11475.2	8204.01	13697.5	10458	12111.6	14573	15178.1	45822	39162.4	36833.7	5038.25	8058.51	14345.5	5563.93	5617.85	8457.3	8928.48	10438.6	10979.8	7208.98	8721.84	6376.82	9101.15	13744.3	4875.81	12298.9	13098.3	15267.1	47209.5	43234.8
9421	361.186	361.158	361.187	309.587	307.739	311.003	28	27	5413.65	5452.2	5975.07	9013.04	7010.35	8233.22	6311.12	8579.34	5500.71	10182.4	9064.9	6674.97	11956.5	8609.64	8850.14	0	0	0	3397.4	3157.38	3683.73	5525.44	4203.65	3411.89	5060.51	4956.37	6116.68	6125.44	5044.96	6918.79	6595.56	8241.82	6449.58	10077.7	10212.9	9550.8	0	0	0	16196.5	18423.3
11489	417.286	417.283	417.287	738.078	736.861	739.405	19	19	8030.89	8697.09	7668.29	15885.5	10043.9	13095.9	10578.7	9851.06	10736	8412	11370.4	7858.66	13138.8	10719.7	9169.76	9657.2	9531.27	9586.93	16033.2	14055.9	12670.8	11285.1	10932.7	11362.7	9644.01	10171.7	9785.64	4999.63	6281.03	7384.31	5050.97	7242.13	7529.18	7603.79	7084.41	9685.63	6957.21	9316.51	11273.5	32664.6	28717.4
12115	437.239	437.238	437.24	276.481	271.018	277.766	31	26	25676.8	20793	22928.1	14023.4	22000.6	19953	13778.3	15239.2	17726.6	18220.5	17665.5	22390.1	19316.4	22097.9	18214.9	26247.8	15894.3	17575.6	22312.3	20771.9	21851.9	10348.1	15608	25130.6	13694.9	16499.7	16298.2	14072	13285.3	16494.1	10359.4	12294.2	15737	14100.3	13908.7	15836.2	14031.2	13130.5	13689.3	21415.3	17821.7
13944	502.047	502.046	502.047	410.93	409.899	412.558	7	7	749.332	3252.9	5988.03	1555.89	4428.04	6862.9	1582.5	7209.14	7078.44	3703.11	6645.93	7570.93	8283.89	7646	8204.78	3370.36	5434.68	9853.89	8672.52	6555.98	8928.66	846.452	1412.86	1486.66	1777.71	2514.74	2209.66	1474.52	2343.56	1570.66	1666.16	2330.93	4597.04	1390.68	6190.78	4214.72	1380.77	722.178	2200.88	20202.2	24730.6
13945	502.047	502.045	502.048	403.049	398.397	404.595	9	8	2427.89	3677.44	7741.78	4754.54	6510.69	6577.16	2412.06	6777.29	7848.47	4043.62	8660.94	7298.37	6793.07	6651.67	8418.19	7150.66	7014.92	7046.51	3086.16	812.414	3100.24	2425.3	3101.79	7621.35	1524.28	1661.31	4587.83	0	2806.23	2384.38	3208.82	6536.07	4702.08	4481.39	6892.45	4289.98	4704.81	3525.27	2675.61	16529	8616.57
14344	518.947	518.93	518.948	41.028	39.8656	41.7147	5	5	8569.78	3592.29	1491.61	4785.31	4122.29	3391.31	3156.75	745.666	684.013	4725.25	4175.69	0	957.727	846.762	0	0	2317.51	1436.68	0	874.555	736.631	5569.83	2285.79	2555.97	4772.86	2175.36	4276.93	5455.19	2337.34	4534.23	5047.91	1549.21	2340.51	0	721.123	0	7634.05	15551.7	17514.5	77679.1	68610.3
15230	551.177	551.172	551.178	366.108	365.611	366.723	42	42	566476	526538	539659	512296	469633	492054	481292	465990	496306	456995	455774	470029	521514	479048	497892	526408	528152	529694	528235	521528	508866	407726	416840	429756	411482	419891	450952	371086	386077	413816	403712	400289	425299	446560	421572	441291	460906	461489	457027	600193	597712
18218	703.151	703.148	703.152	317.889	317.705	318.093	7	7	5361.75	3295.37	2879.1	6296.24	3486.49	4099.02	6432.61	3701.48	3586.32	5677.76	4484.15	3167.52	3373.06	4405.94	4665.56	4142.08	7061.13	7477.79	8373.77	7626.53	7058.52	812.442	1707.76	3380.66	1541.63	685.256	1905.83	2885.61	1233.19	1774.86	3939.14	2191.63	2131	1398.58	1557.03	2064.71	3356.94	3956.09	6195.16	11630.4	12723.1
19788	789.261	789.254	789.262	365.994	365.139	368.598	44	42	146618	121195	121601	125796	114285	109741	112377	106209	110594	115995	100477	110488	129425	121614	122441	113005	115577	123410	127867	131606	110430	92316.3	88816.4	90698.2	95058.8	91533.2	91732.4	87475	88438.7	87861.8	89951.8	93851.7	95856.2	102306	100712	90116.4	95034.1	97127.1	106230	135303	147203
20752	852.256	852.249	852.257	353.072	352.447	353.567	42	42	29954	33249.6	35928.3	29902.9	33469.3	36497.9	35204.4	33961.6	40339.6	34797.5	34755.2	37241.3	25805.8	24766.4	24893.5	26875.8	25243.5	28024.3	35580.5	33610.9	33044.8	22675.1	22814.3	22679.6	23046.6	25009.3	25130.7	21700.7	22754.5	23110.8	20611.5	23709.3	27043.1	18350.8	15198.5	18998.7	20815.4	21553.6	21795.5	34530.1	36048
22506	1031.42	1031.42	1031.42	346.655	345.675	346.917	8	8	0	0	0	0	0	0	0	0	0	0	0	0	0	0	0	0	0	0	91220.9	90894.4	86716.9	0	0	0	0	0	0	0	0	0	0	0	0	0	0	0	2368.68	5370.66	5633.98	379364	382727
7436	315.106	315.105	315.107	208.607	208.167	209.046	42	42	90034.7	84141.5	82634.3	106371	92160.2	80195.1	72202.1	69336.5	78444.2	83946.3	79622	86064.2	64243.7	66649.8	65535.9	72285.4	84758	89571.1	93858.5	95838	90881.1	86413.8	89860.8	96428.1	86954.3	88654.5	82528.5	65446.3	67140	70312.4	64272.8	67458.6	70502.6	78009.9	81749	92378.6	80857.6	83607.2	86175.5	107505	107359
20212	811.214	811.208	811.216	292.956	283.453	293.868	15	13	0	0	696.603	741.677	0	0	0	732.508	719.931	1073.92	930.089	2455.83	3253.27	2449.07	1607.32	7838.77	8641.89	7397.07	14645	12119	15035.7	0	0	0	0	0	0	0	0	734.769	849.436	0	0	728.525	680.501	0	4594.33	4409.29	4972.78	18145.3	13520.6
22514	1032.42	1032.42	1032.42	346.655	346.298	346.803	6	6	0	0	0	0	0	0	0	0	0	0	0	0	0	0	0	0	0	0	27891.3	27213.4	27615.9	0	0	0	0	0	0	0	0	0	0	0	0	0	0	0	0	0	0	117330	114013
2450	193.014	193.013	193.015	135.742	133.535	138.61	33	33	19400.4	14308.2	13981.1	6293.8	10891.2	18020.6	13461.1	18595.5	20558.8	23505.4	19539.5	23071.4	17156.7	15860.5	15722.8	33846.8	35245	32713.5	66690.5	55416.1	58437.2	9657.02	9566.13	14029.2	11978.7	11892.6	12654.8	10533.6	16456.2	13139.9	15808.3	16463.5	16007.2	15800.5	10677.6	15484.7	18274.2	19891.1	22896.7	48373.6	44861.9
3203	203.056	203.056	203.058	108.168	107.36	109.727	34	34	41648.1	48440	93011	39273	74022.2	53246.4	50838.7	58749.3	92892.2	64109.2	110824	98525.4	28570	35926.5	34639.1	87386.3	85464	113988	180871	170392	188858	10210	12880.6	17494.5	8401.15	10635.2	19761.3	12029.8	19629.7	24463.1	16810.2	22290.3	24381.7	7148.64	11278.9	8537.86	23744.6	19583.3	6766.55	41996.3	27440.6
3817	217.071	217.069	217.072	142.029	141.43	142.775	7	7	4943.81	3779.24	5008.45	3567.94	5782.17	7419.16	6047.84	7083.79	6990.21	6332.07	8339.35	15891.3	2081.65	0	765.344	6822.7	9676.76	8699.75	16394.5	13147.9	15305.7	0	1571.51	2273.34	0	684.232	0	2336.32	1592.03	3315.45	1839.95	2173.56	3937.87	692.215	0	0	694.783	1450.67	730.114	4715.78	4036.96
4258	231.124	231.124	231.124	316.073	314.922	316.932	12	12	0	781.852	0	782.838	0	765.263	768.233	746.065	1590.95	0	0	799.872	3361.14	2485.48	851.591	15788.3	11988.8	14067.8	36426.6	33094.6	31886.9	0	0	0	845.409	753.848	0	0	1553.87	689.869	0	0	0	0	718.164	0	7223.98	4494.16	4142.51	34549.3	33553.8
4597	243.088	243.087	243.088	218.362	217.091	219.551	23	23	7974.71	9164.9	9740.79	11699.2	8919.47	10792.2	6092.02	5555.35	9518.44	9300.48	11323.9	13282.6	12110.8	7528.48	9008.53	21666.3	18339.4	23647.6	36692.3	42874.4	38417.5	13758.3	13747.1	14865	8949.72	7387.07	9915.64	4474.16	4641.89	7755.28	5864.56	8969.76	11016.8	9823.32	5650.6	9688.51	16370.4	19312	24741.8	49509.7	42344.3
5545	271.119	271.117	271.12	290.026	288.96	291.579	26	26	14602.8	15747.8	16669.3	23692.4	14174.3	20624.1	13543.1	13475.2	17335.4	16921.1	28397.9	20493.3	9086.26	11215.7	8525.57	13552.6	12289.3	13782.1	33553.7	37863.4	21936.3	23041.4	25325.4	31822.2	12151.5	14718.4	15322	11036.1	12114.7	6128.34	13480.2	16572.3	15945.8	13145.9	13950.1	10623.5	12968.5	14728.8	12761.8	42843.9	32537.2
7229	311.02	311.019	311.021	369.095	368.298	370.48	41	41	24665.8	14953.6	17196.8	21921.4	18387.5	19646.9	22423.6	20248.9	17713	17445.4	19566.9	23257.4	26461.3	20468.6	21421.4	20079.5	15303.7	21138.8	29495.6	30303.7	25083.9	16668.5	16871.7	19673.5	23970.6	22115.5	18200.2	20465.5	20533.5	19922.2	20457.5	18979.7	21792.2	21091.9	15851.1	20782.7	20464.5	19570.1	19614.9	31707.6	31537.8
11870	430.068	430.066	430.07	523.488	522.443	524.541	17	17	3315.63	3859.79	6380.01	2619.57	4739.6	2348.21	3257.72	7696.42	3520.55	2144.07	2891.31	3518.42	1447.35	954.579	1710.39	2482.1	4478.23	3615.55	2841.38	3392.48	1455.48	903.953	763.221	3212.42	4120.81	4485.02	3317.78	844.366	709.582	1415.31	2384.06	4733.29	708.934	3236.41	3944.17	2195.88	0	3365.71	0	3968.07	4252.31
12749	457.244	457.241	457.245	466.711	465.677	467.547	15	15	3048.3	1809.95	1546.88	2744.02	806.274	2955.49	2351.56	0	5224.53	3975.96	2473.79	1367.39	16519.2	10624.2	15273.4	5349.61	6878.89	3992.6	6108.33	3867.73	5569.05	2779.59	2330.39	1739.79	2304.09	0	2297.89	0	1891.35	696.162	2628.81	2436.29	702.511	1549.29	4165.83	3301.53	3345.08	1916.12	3668.39	10106.2	8882.96
14571	527.117	527.115	527.12	274.14	271.278	275.63	39	39	8292.06	9262.57	8787.97	6856.25	9508.54	8804.54	9597.63	8909.94	8678.69	10580	12440.2	13738.5	13001.8	14812.9	11353	12092.4	16320.8	12437.3	22640.7	22830.8	20355.9	15146.3	16258	13569.2	14318.8	17592.4	20055.3	14830.7	21899.4	20963.8	21921.4	24462.7	24074.6	27376.6	18463.3	26971.7	6768.15	12609.7	10579.5	32895.2	28880.3
17913	688.127	688.123	688.13	238.231	235.984	239.567	11	11	0	0	687.977	0	1520.47	0	0	0	768.513	787.879	3750.77	3893.77	1825.95	2454.32	1696.42	7086.14	7113.95	8028.46	9004.66	8351.64	8972.83	0	0	0	0	0	0	0	0	0	0	0	0	0	0	698.737	900.744	0	0	4660.13	6662.96
19614	777.23	777.228	777.23	110.763	109.417	111.453	7	6	0	0	0	0	0	0	0	0	0	0	0	0	0	0	0	2187.83	3230.45	1648.4	6800.86	7199.15	7185.53	0	0	0	0	0	0	0	0	0	0	0	0	0	0	0	797.101	0	796.801	9932.27	7003.89
23093	1111.32	1111.32	1111.32	173.605	170.91	178.058	11	5	0	0	0	0	0	0	0	0	0	0	0	0	0	0	0	1536.54	1596.54	1546.49	6366.37	4765.18	4636.71	0	0	0	0	0	0	0	0	0	0	0	0	0	0	0	1394	2472.39	2864.68	11824	10585.1
18921	739.209	739.204	739.21	262.271	253.827	263.469	16	14	11127.7	11677.4	10785.9	9745.33	10529.8	9313.49	12581.8	12497.9	13296.2	7451.42	8680.54	7710.36	2730.82	2550.36	2349.38	2277.36	1507.04	8480.04	0	0	0	6261.02	7672.91	7111.94	6047.4	7724.69	8364.44	3779.14	5958.31	5981.47	3527.93	5018.04	5004.29	3498.44	1602.78	8321.63	8825.75	1001.22	1560.37	0	0
10352	385.114	385.112	385.114	252.474	251.907	254.236	25	25	235144	229256	235755	243724	232624	257666	229456	220984	236702	18455.9	20039.1	18662.5	762.297	775.738	0	7096.65	5269.75	4813.48	0	712.93	0	168640	170522	187051	171881	176178	187998	188657	184306	194314	12165.1	12190.6	12860.8	1513.87	695.382	0	1574.02	794.075	2248.45	0	0
16164	589.188	589.184	589.191	263.416	263.022	264.07	15	15	13145.3	11490.8	9609.43	9343.94	6062.38	6208.52	3070.32	3533.83	766.924	0	0	0	0	0	0	0	0	0	0	0	0	6827.92	6685.5	8068.8	7227	5222.03	6138.23	3237.68	3653.34	3272.16	0	0	0	0	0	0	0	0	0	0	0
10139	380.102	380.1	380.102	177.536	176.576	177.923	20	20	63071.9	70422.4	75674.4	61604.2	71049.8	76474.7	48179.8	50232.1	56437.2	3337.62	4439.02	4951.22	0	2625.9	0	3448.61	3405.22	4432.46	0	0	0	59977.7	63914.7	70376.6	60712.9	67842.4	67671.1	49071	50481.3	55772.7	5137.29	6813.65	8911.95	941.337	870.875	743.546	3198.4	727.217	693.562	0	0
14798	535.179	535.174	535.181	270.662	269.355	271.515	20	20	42831.5	39429.9	38813.9	37698.3	36177	33121.4	22800.1	21860.3	19147.7	7851.45	9378.74	9265.69	9463.72	10044.1	10066.2	4007.37	4818.67	5685.69	1444.32	2168.77	2653.58	51669	46790.8	47810.5	47218.1	50041	52351.4	29477.3	28345.7	28282.1	3391.77	1364.43	2999.12	10928.6	8498.6	1844.81	2945.68	2011.42	692.623	2346.98	1664.36
14907	539.142	539.139	539.145	37.186	36.6559	37.2443	7	7	4112.47	4052.66	5578.79	4410.43	3999.92	4170.37	1657.68	2219.36	2682.31	0	0	1599.22	933.515	2243.98	2300.38	4064.14	4632.78	4661.06	0	0	0	6198.98	8071.95	4836.72	6008.93	6916.09	6014.35	6069.35	7052.86	7141.07	1434.32	707.709	3442.02	4905.48	4868.57	3949.6	731.666	930.211	742.649	0	0
16234	593.151	593.147	593.152	246.205	245.692	246.464	27	27	2.06023e+06	2.02423e+06	2.13284e+06	1.87017e+06	1.83555e+06	1.93228e+06	1.41364e+06	1.39882e+06	1.52094e+06	281234	276272	291950	45085.4	63411.7	62684.7	38714.1	35530.5	32196.2	5351.64	7509.92	7383.11	3.1464e+06	3.34607e+06	3.55037e+06	2.94246e+06	3.11592e+06	3.24402e+06	2.16146e+06	2.25921e+06	2.34224e+06	583270	614684	643849	218743	207984	213510	29029.6	22412.8	26691.8	13212.1	12532.7
16779	623.162	623.158	623.163	250.87	250.219	251.528	35	35	283152	273017	285669	262089	246796	254978	233393	195443	213851	82355.3	60867.4	65244.7	18888.3	19351.6	16810.1	4838.84	5270.48	6169.5	0	0	0	472894	481115	499336	444002	450410	474919	352514	368459	379644	139053	137600	145747	63056.3	59103.4	61714.1	5902.99	6537.22	5887.13	0	0
6749	299.186	299.185	299.187	404.455	403.067	405.525	18	18	48272.1	41074.4	43967.6	58578.3	60359	65142	47890.5	46240.7	48985.1	6875.96	5793.92	7160.52	4750.2	8249.52	9444.85	2331.76	9059.82	6580.53	2505.08	3114.5	1634.14	32360.2	30757.3	30538.2	39887.5	35322.7	50693.8	34231.2	38565.7	39630	3236.55	1508.93	6697.52	3751.42	3815.41	3128.71	796.574	3032.35	835.929	3784.58	1439.51
4603	243.124	243.123	243.124	308.364	304.183	309.72	24	24	25363.8	30212.7	27386.4	86595.6	89399.1	99260.8	70960.7	80185.4	88158.7	8926.72	10274.3	10284	14850.6	10654.5	14418.3	11448.9	22318.5	21427.1	29594.8	22333.3	27275.3	22138.5	22762.6	24580.4	63599.3	61339.8	63367.4	87312.9	85509.8	94424	7598.63	8481.05	8240.44	13869.7	11878.1	16074.5	16031.1	14520.8	12831.3	29114.1	30066.2
9806	371.113	371.111	371.132	336.264	331.067	337.479	14	14	17199.6	13700.5	14091.7	9626.11	9657.19	13785.9	8080.82	6259.58	8191.56	5468.07	7896.35	7103.48	6982.44	5759.9	5449.83	6296.75	6474.3	6533.29	2083.61	3383.94	5638.72	19143.6	16314.4	16037.3	11221.2	19286.7	22773.4	12889.7	12596.3	13417	11178	10701	13884.4	11994.3	10016	10996.4	12476.4	13102	11111.8	13270.6	5495.86
11613	421.164	421.156	421.164	251.6	248.118	251.907	19	19	25176	29398.3	33944.3	30461.1	34277	36646.3	25061.9	25731.3	33045.6	844.089	0	1590.5	0	0	0	739.228	748.344	1668.14	1366.97	2113.49	828.608	28429.9	26821.5	32746	30783.3	30500.7	33796.9	24258.3	26036.2	30323	1540.25	3072.21	4028.37	737.207	738.56	0	767.006	0	0	3804.06	4915.9
11908	431.097	431.096	431.1	245.886	243.363	246.342	12	12	5152.14	5858.13	7718.36	5225.44	7066.41	6685.6	4335.85	4195.71	4107.94	0	0	819.081	0	0	0	709.967	0	0	0	0	0	9138.83	10327.1	11859.4	10142.7	9884.21	8828.46	7278.83	7658.1	6740.81	1632.22	860.856	1739.93	1422.14	0	728.388	3163.22	698.582	4997.27	0	0
15126	547.145	547.144	547.147	319.277	318.61	319.474	9	9	11863.5	7757.24	10055.1	9611.88	8270.11	11520.6	8887.4	11320.7	8766.82	1266.2	741.182	728.954	1556.03	0	808.07	5464.29	4531.2	5869.43	8149.07	7815.32	8643.25	835.044	739.365	0	0	0	1370.84	850.129	687.807	1422.08	0	0	0	0	0	0	0	0	0	0	0
18196	702.021	702.018	702.022	266.746	266.155	267.417	40	40	33376.4	25651.1	27456.8	25877.5	23386.9	28042.1	22755.7	22234.6	25481.4	19862.2	21364.6	20679.2	12849.7	15657.3	14397.1	15499.2	15350	13989.5	4848.94	3673.77	3074.14	16581.7	19250.6	20374.4	16084	18933	17927.1	12799.9	17978.8	14667.1	13868.4	14880.3	13677.6	10862.5	9580.97	7633.09	12345.1	10096.2	11509.2	6319.09	6896.73
8314	334.093	334.091	334.095	340.376	339.37	341.276	34	34	30437.1	23177.6	21019.3	18862.9	16690.7	16699	15930.2	14268.4	13024.2	8768.8	6444.31	9953.79	7339.29	4350.71	4407.52	6546.62	5053.84	3911.12	705.631	0	766.551	17410.6	18771.5	19268.5	14518.4	16782.6	17097.9	12296.6	8775.85	11401.1	7206.17	11002.9	5133.41	3259.75	4647.66	6762.8	5645.77	5404.77	5392.96	2118.1	0
15202	550.182	550.18	550.188	40.3674	35.8543	41.2884	22	22	17482.7	10546	17630	13036.9	7396.14	7171.72	4832.28	3776.35	3213.95	4267.16	2987.33	1038.8	4440.49	2808.7	1543.77	0	0	0	0	0	0	13579.8	16383	12557.7	16960.8	13802.7	12474.6	16723.4	13040.6	11448.9	5393.8	4067.43	4636.01	8408.2	5928.28	7808.86	0	0	0	0	0
7515	317.16	317.159	317.161	292.029	291.489	292.536	12	12	15569.4	13849.9	14691.4	11906.5	8325.43	12134.2	0	0	0	0	0	0	0	0	0	756.378	0	0	732.88	0	701.069	14262.4	17322.6	18760.6	13843.8	13867	14437.5	0	1541.1	721.292	0	0	0	0	0	0	0	0	0	0	0
7644	321.028	321.027	321.031	162.401	160.009	163.302	37	37	18453.4	13760.6	15169.7	22536.7	17528.7	19628.6	14106.5	12190.4	12629	15250.9	12752.8	18139.9	14624.6	9933.63	10107.2	5632.67	8859	9366.44	11832.4	12172.2	12505	16785.4	18783.5	15504.4	15076.2	13878	14215.2	11313.6	10765.2	11020.7	9552.99	11120	9102.46	9151.78	6269.47	8596.73	7073.52	8509.13	5597.85	4401.2	1869.61
9723	369.084	369.082	369.085	177.267	176.925	179.424	5	5	9421.75	10008.7	11264.8	11896	10928.7	12031.1	6119.43	4601.42	5465.19	1455.65	1546.18	0	0	0	0	0	0	694.114	714.189	0	888.235	12877.9	14018	15394.8	14374.7	13390.6	14722.5	12046.9	12506.6	13696.6	986.852	0	1421.73	859.965	880.064	1384.4	761.526	687.322	700.292	2318.56	3963.02
9724	369.082	369.08	369.093	203.87	198.515	204.527	36	36	80662.8	80354	82328	76244.1	78738.5	79194.8	69936	68691.9	74736.1	29961.1	31319.1	31970.9	16402	15966.3	11213.5	12447.8	14576.9	16044.1	51310.8	51131.6	4504.79	56752.3	58399.5	64282.2	56092.1	52869.1	59883.6	56147.9	56248.5	57004.2	28966.8	26114.4	27651	14659.4	15634.1	14698.6	10282.7	10646	31122.7	57452.7	55604.5
9728	369.087	369.086	369.094	188.628	184.506	193.847	6	6	3365.48	5046.87	3668.82	5907.38	3614.27	6357.2	2944.21	4732.76	4460.47	0	0	1497.14	0	0	0	0	0	0	761.262	961.916	1761.25	3482.18	4272.81	6143.43	4202.91	1669.53	4260.27	3695.65	2855.33	2857.22	0	728.206	730.104	0	0	0	0	0	0	4719.95	0
10025	377.086	377.057	377.087	47.4837	46.0444	50.8339	15	15	312447	237737	262911	421814	230484	228113	516540	169587	164583	268707	105542	16620.4	92769.6	91732.1	95703	46734.4	76917.6	54058.8	8117.31	7506.37	8101.29	336220	257138	278633	276475	234049	250648	190791	237804	220646	122931	140389	137086	97473.6	103243	114198	26480.1	29991.2	15301.5	8927.07	7395.91
10098	379.097	379.094	379.098	321.516	320.651	322.74	7	7	2509.33	2646.79	2196.07	5174.52	3420.19	3696.42	4323.6	4992.22	4277.68	730.137	745.307	0	0	0	0	0	0	0	0	0	0	1634.69	4076.65	2920.25	2614.91	844.089	4716.34	2489.84	1494.46	1424.56	0	0	0	0	0	0	0	0	0	0	0
10449	387.13	387.128	387.131	177.568	177.237	178.23	27	27	2.64163e+06	2.48063e+06	2.51464e+06	2.59118e+06	2.48179e+06	2.49407e+06	1.71166e+06	1.66309e+06	1.73059e+06	85278.7	85746	92642.5	18127	17896.1	13147.1	37374.4	40187	41112.4	45173.4	48167.2	47490.3	2.09891e+06	2.05139e+06	2.13881e+06	2.11524e+06	2.13901e+06	2.18617e+06	1.6811e+06	1.69978e+06	1.72539e+06	151958	150815	156927	19601.2	18384.4	21576.7	46214.3	50946	47824.4	44205.9	44451.5
10456	387.166	387.165	387.167	315.664	314.322	315.917	5	5	8183.72	5258.81	6966.27	9371.91	8350.56	11681.1	783.745	0	1829.65	2317.95	1638.97	751.16	3974.04	1541.04	792.858	742.698	689.407	1411.44	737.388	773.287	1407.39	2603.17	3701.55	4697.49	3998.32	5333.97	3299.39	0	0	0	0	0	0	0	0	0	0	817.388	689.478	757.663	0
11794	427.161	427.158	427.163	330.857	330.104	331.283	12	12	10877.6	10837.2	11999.3	13528.3	10817.8	13837.2	3405.83	803.454	2363.54	0	0	0	0	0	0	0	0	0	0	0	0	8687.21	6345.3	8865.56	5874.62	8462.41	7518.69	718.023	706.077	0	0	0	0	0	0	0	0	0	0	0	716.73
12429	447.093	447.091	447.094	246.181	245.55	247.002	10	10	7966.29	7195.47	6371.59	6818.85	9147.41	6061.03	9357.32	6845.15	5901.39	3508.86	743.848	0	6016.16	0	0	0	854.945	685.54	0	0	0	11255.9	11414.7	11859.8	11957.2	14101.9	11477.4	12163.5	13178.4	10591.4	6460.97	3961.74	1815.53	0	0	1407.27	5704.15	4994.05	8455.03	10690.7	10097.4
13321	477.104	477.102	477.105	292.689	292.077	293.101	16	16	0	0	0	17431.5	15392.3	16914.8	8016.89	6021.29	7239.08	0	0	0	0	0	0	0	0	713.225	0	0	0	8492.92	7509.62	8084.66	36009.9	36460.6	38447.8	17513.2	17686.9	20074.5	750.946	0	0	3101.16	1769.75	2555.79	0	1521.91	0	0	0
13621	489.175	489.173	489.177	274.44	274.052	275.653	13	13	12298.1	11165.2	11397	9590.32	10751	10524.8	3817.86	2983.43	1739.44	0	0	0	0	0	0	0	1946.21	953.394	1493.37	4767.88	2209.65	36896.7	37680.5	37828.4	34666.5	31979.6	39753.1	12406.6	13919.7	15974.9	711.091	0	0	0	1510.79	0	2791.8	3356.39	1125.41	19515.1	20393.2
14361	519.187	519.185	519.189	285.237	284.322	288.594	15	15	31984.7	18186.3	31513.2	20971.8	20243.1	20336.8	11411.7	10829.8	11989.6	0	0	0	0	0	0	0	0	712.745	0	0	0	23580.6	28471	22616.2	22124.8	19852.9	23564.3	10373.4	11070.4	9706.88	0	0	0	0	0	0	2580.26	778.249	761.256	2453.37	1660.46
14417	521.203	521.2	521.205	263.42	263.183	264.003	22	22	263515	241835	249091	195629	179066	188154	114435	112104	116800	0	2276.78	0	0	0	0	724.793	1686.99	682.862	0	0	0	181860	183300	194540	178067	182855	188200	112242	116623	121140	7088.79	9001.44	8675.58	0	0	0	4686.81	3471.17	2750.13	0	0
16396	600.294	600.293	600.295	381.974	381.78	382.655	9	9	9524.18	8520.9	6553.99	6708.75	7540.3	8188.29	6446.6	6376.87	6072.15	0	0	0	0	0	0	0	0	0	0	0	0	1530.79	1592	2526.37	2638.35	2309.24	2465.2	856.899	1462.73	1568.6	0	0	0	0	0	0	0	0	0	0	0
18385	713.132	713.129	713.146	289.047	285.695	291.254	20	20	0	0	0	0	0	0	0	0	0	0	0	0	0	0	0	0	0	0	0	0	0	11873.8	12442.7	12107.1	15060.6	12864.7	15790.3	13847.3	14254.8	13891.4	4778.64	4248.77	9312.85	6453.49	6042.78	7229.31	11692.4	10205.5	9378.22	15225	14353.7
10136	380.099	380.097	380.1	340.433	339.639	341.59	36	36	32902.9	25925.8	25753.9	24488.3	17668.3	17360.5	17467	16680.1	15206.9	11074.7	10106	11061.5	7663.68	6277.03	6291.89	8248.61	4491.68	6780.09	779.012	681.358	0	23342.1	21343.3	20270.2	19002.9	16887.4	17371.7	12291.3	12294.1	13036.8	7627.32	8959.48	7241.32	5721.45	5474.77	3874.52	4374.33	4964.03	4323.97	3678.42	4148.01
10863	399.093	399.091	399.103	193.209	187.017	193.882	27	27	80390.3	70201.7	69193.6	77663.9	69446.7	73171.3	45255.5	43394	46741.1	0	2873.28	3147.57	680.81	2734.46	2259.77	8971.21	10733.9	11560.4	11372.5	9732.51	6530.01	55762.4	52093.9	57832.5	55485.8	56033.7	54977.4	41616.4	41472.2	42740.6	3407.27	1442.63	2249.83	4022.15	2440.08	4930.65	11334.6	9469.71	10857.7	14381.9	15705.6
11858	429.176	429.175	429.178	343.887	343.127	344.488	10	10	8599.08	6924.79	4155.68	4832.83	6442.66	9874.86	0	0	0	0	0	0	0	0	0	1386.36	0	0	0	0	0	3631.63	4636.22	3608.81	3310.37	4061.69	4231.8	0	0	0	0	0	0	0	0	0	0	0	0	0	0
14683	531.114	531.112	531.115	334.962	334.636	335.656	9	9	10117.1	10583.1	10888.1	3174.71	2532.72	1620.83	0	0	0	0	0	0	854.299	0	0	0	0	0	0	0	0	52403.3	46238	45069.7	66274	60688.4	57900.4	16631	16797.9	15117.5	732.068	0	3189.47	0	0	0	983.945	0	0	855.218	0
15667	567.208	567.207	567.21	249.744	249.173	250.443	15	15	14929.1	12699.8	13986.2	11604.4	11279.1	11140.5	7712.81	7622.91	6816.51	0	0	0	0	0	0	0	0	0	0	0	0	9768.53	8580.86	10364.8	8013.42	7010.11	9594.88	7201.16	6710.74	6374.53	0	0	0	0	0	0	0	0	0	0	0
18607	723.108	723.103	723.11	246.363	245.753	247.002	17	17	10373.5	7724.71	7075.48	8216.77	6642.11	6870.72	3458.44	4144.68	3751.61	0	0	0	0	0	0	0	0	0	0	0	0	10995.1	10335.8	11419	10667.4	10698.1	13283.1	9349.98	7089.86	5065.4	0	0	0	0	0	0	0	0	0	0	0
19402	763.281	763.277	763.283	271.876	270.263	272.946	10	10	9235.12	4032.03	3954.53	6399.09	4403.25	4182.26	4625.87	3759.03	5726.55	2257.61	4466.41	0	0	0	0	0	0	0	0	0	0	2871.1	2152.72	2567.26	1450.51	3507.39	770.49	0	890.063	2220.82	704.204	0	0	0	0	0	0	0	0	0	0
5132	258.076	258.075	258.078	340.409	339.653	341.067	14	14	13226.1	9339.43	9851.19	9010.19	8183.05	9075.93	4884.14	5156.54	4073.71	3056.23	749.488	2180.36	2265.15	1540.16	988.282	1475.55	1937.11	3019.54	0	0	0	10051.1	9083.09	8290.99	6571.26	7125.41	9406.92	5007.77	3562.92	7429.36	1754.24	1625.61	2713.69	2386.24	0	1594.98	1782.32	725.157	792.253	1693.97	2624.92
6640	297.171	297.169	297.171	373.106	372.619	373.773	18	18	64967.6	60049.9	63824.1	82722.9	81528	85880.7	64651.3	65893.7	71066.6	763.363	0	1744.43	2936.69	721.525	1418.4	0	1402.84	823.009	7440.68	1577.19	2214.75	39971.4	41518.6	40714.9	51836.1	56773.2	59045.9	40629.5	42996.7	44181.5	0	681.895	0	0	741.62	0	717.944	0	0	1550.13	0
7028	306.077	306.076	306.078	165.208	164.588	165.966	9	9	2198.77	0	0	7872.38	7170.67	7817.52	8875.16	7354.39	7580.13	0	0	0	0	0	0	846.656	0	687.05	1439.25	816.957	0	0	1517.37	0	8297.82	12769.4	12109.5	7413.97	9940.92	8091.48	0	0	0	0	0	797.561	1483.19	735.266	983.789	696.152	2280.46
7864	325.201	325.175	325.202	476.047	475.175	476.673	5	5	111274	106477	103008	61625.5	82119.4	87090.3	52940.6	49204	54120	25675.9	28640.9	28609.4	18542	19625.9	16831.5	12659	10536	11306.6	23498.7	14701.3	14355.6	85348.8	80813.8	82872.2	65784.5	63734.6	73497.9	36586.8	35462.1	38957.8	19770.3	15689.8	21547.5	13071.4	12035	12218.1	14573.4	13266.5	12076.2	16037.7	5082.93
8400	336.109	336.105	336.11	227.4	226.671	228.64	16	16	6112.07	7312.17	6170.02	8126.75	7810.79	7033.26	6430.93	5202.42	7554.14	0	0	0	0	0	0	0	0	0	0	0	0	3538.09	5158.3	5105.8	3706.88	6511.83	6261.13	3876.47	5307.74	3614.92	0	0	0	0	0	0	0	0	0	0	0
8603	341.11	341.106	341.111	63.9765	62.5242	65.4933	7	7	14934.8	8294.8	4915.44	15062.8	733.888	6021.52	20577.6	2212.73	2410.91	10136.6	0	0	0	0	0	14998	15255.5	16685.7	33314	30390.3	31256.3	7976.62	2183	4983.23	9975.36	1443.14	1407.06	10221.4	8126.81	4769.37	0	0	0	0	0	0	764.976	1425.41	0	5288.53	6001.69
9333	358.987	358.984	358.99	136.05	131.837	141.502	44	42	41434.7	31605.3	33528.7	59391.8	43145.5	36685.1	35996.5	25268	41155.2	52220.7	40701.1	43161.2	23764.9	26663.3	15796	28926.7	32447.9	24945.5	58489.7	59151.6	42644.2	38756.2	46689.5	49264	40940.4	40506.4	37581.3	32704.9	38187.3	19099.1	29192.6	34276.8	29752.9	30472.8	26444.3	27041.2	28249	27185.4	24059.6	6091.03	23566
17964	689.084	689.079	689.086	246.181	245.661	246.541	18	18	8705.44	11642.6	11161	7578.97	10485	10424.5	7465.46	8149.33	7965.96	0	0	0	0	0	0	0	0	0	0	0	0	18259.4	21966.5	21509.8	17365.9	17881.7	21290.6	11310.1	14647.8	14267.3	7546.14	9705.51	5662.94	0	0	0	0	0	0	876.558	0
7843	325.092	325.091	325.094	161.589	160.984	162.518	11	11	792.504	2140.91	880.612	1426.13	0	1559.94	0	0	726.06	768.01	766.047	784.72	0	0	0	0	704.774	1462.85	746.271	0	0	9873.74	12733.8	14145.9	8384.81	8621.19	10124.2	13034.6	13216.6	13603.9	14066.5	12285.2	12828.6	10501.5	10425.5	10916.1	0	2570.26	0	1796.04	1428.69
9169	355.104	355.102	355.104	177.585	177.237	178.404	33	33	96241.2	94336.1	96277.1	101393	96363.4	94191.7	100213	93828.1	100941	107872	111228	117032	107741	100360	94945.1	40236.5	40093.4	43389.5	0	0	0	107165	108228	115246	110363	111881	118439	128754	130589	130094	119710	123498	118797	118776	122054	114524	0	0	0	0	0
7357	313.093	313.091	313.094	168.63	167.809	169.498	23	23	16415	15642.3	17643.5	17694.7	16781	19007.6	19321.6	20546.5	19808.7	22362.7	21766.5	25938.9	19289.9	18447.6	18336	29119.5	30887	27676.6	806.348	812.84	0	16716.5	16264.5	16030.8	16449.9	17910.7	15310.1	19601.4	24500.4	19979	22759.7	21985.3	23346.5	19344	18145.3	18432.2	3137.03	5374.9	5963	1410.53	771.913
8683	343.067	343.065	343.069	176.192	175.31	176.991	20	20	6665.56	7267.88	8223.2	4985.7	7318.64	7620.72	5890.98	7847.51	6467.27	8680.47	11355.5	8834.25	7471.82	6155.78	5831.91	0	689.237	0	1459.57	1825.84	747.275	7192.18	7229.44	7257.69	8688.58	7744.84	7727.19	3561.96	4737.43	4838.36	4191.82	4719.22	5739.62	4951.08	8699.86	9586.92	714.386	0	0	0	0
9171	355.104	355.102	355.105	223.271	222.552	223.95	14	14	7862.43	8379.39	9952.08	9458.2	9434.71	8126.53	8175.26	9366.57	6768.79	9392.42	10905.9	11888.6	8175.08	7088.61	7174.95	9050.4	9514.43	11784.5	0	0	0	8585.65	8868.74	8950.6	8547.81	6892.83	10242.8	10284.5	10921.6	12113.3	10419.2	9046.64	10261.5	10676.6	9994.45	8821.29	6845.05	7663.11	7654.36	1781.33	0
13978	503.156	503.154	503.158	274.979	272.116	275.727	24	24	3435.2	3959.07	3619.35	5445.77	6316.03	1700	4184.75	4920.83	3202.81	6030.19	5993.37	5583.65	10991.4	9783.83	8679.25	4058.06	3468.07	935.481	0	0	0	7815.85	9325.96	9609.16	11105.8	9011.46	11073.2	8548.5	10901.7	10948.2	9884.68	10965.3	12011.5	14993.1	14918.7	10993.5	1614.93	4874.97	4298	0	0
13811	497.13	497.128	497.133	200.835	200.031	201.883	42	42	6125.84	5528.43	7026.99	6487.51	6335.46	6193.09	6722.88	6172.16	5467.87	10965.9	9292.97	9520.96	11781.2	11657.1	10751.4	13121.2	12048	12793.1	4189.08	4485.79	5218.03	559616	577788	622365	559787	603510	624384	670672	727274	738581	673813	716123	755448	705715	689888	705617	342763	324010	325992	20710.7	25272.9
7953	327.109	327.105	327.11	179.545	178.905	181.461	30	30	9983.01	8590.07	9524.82	6273.42	8262.22	8470.08	7736.28	7141.19	7145.53	8157.97	6294.78	7297.38	5180.49	7986.24	5425.94	0	0	0	0	0	0	151441	138671	146774	149692	146209	150723	182487	176838	173523	166160	166298	174769	159336	164439	169812	3843.84	4716.46	5518.25	18657.7	3252.1
9340	359.099	359.097	359.1	153.104	152.858	153.973	23	23	17726.8	19007.3	19245	18723.7	22238	17843.5	16876	18852.6	21918.2	23367.4	20914.4	25478.6	21878.2	17372.2	15969.6	6206.91	6464.09	8210.68	0	0	0	14757.2	16767	17332.1	16046.8	16115.3	17038.5	18108	21545.6	21719.4	20544.8	21288.7	19152.6	16295.2	16658.1	16605.5	2841.49	3159.11	1857.02	0	0
19424	765.145	765.138	765.147	255.745	255.196	256.144	36	36	63913.2	61635.1	61132.6	61979.9	58373.7	61303	56326	55906	60111.6	67298.4	62567.7	69005.3	60606.9	61743.7	67774	69535.1	67642.7	74541.1	0	0	0	94187.9	93271.1	96429.3	104224	107598	109772	111774	112894	118412	104550	102850	115155	106410	108068	109515	57054.3	57428.5	57338.7	6339.78	5709.57
8431	337.079	337.077	337.081	54.7501	54.1682	55.0704	30	30	20642.7	23864.4	22358.9	22787.2	20634.3	18643.4	29699.3	24084.7	18242.9	31657.7	20829.6	24062.2	16295	22153.4	21806.6	0	0	0	0	0	0	18538.6	15073.8	15680.1	21497.4	17599.9	19795.9	29903.6	29445.3	26897.4	29999.6	21547.7	24434.2	25576.4	22510.8	25254.6	0	0	0	0	0
8281	333.192	333.191	333.193	402.975	396.369	403.996	71	42	97263	127567	123987	98207.6	113225	133866	120633	186251	204291	119619	206702	233273	296226	113831	97288.3	102979	92629.4	120825	50041.6	51083.5	42911.5	101837	176030	172037	115569	257422	257852	83012.2	97820	103657	102557	256922	123647	222412	97757.4	78631.9	104760	69486.9	90586.1	73618.7	90587
11554	419.228	419.227	419.23	388.694	388.177	391.436	6	5	1399.68	0	0	9881.44	7560.34	10229.7	11708.7	12188.8	12661.8	15841.3	17848.2	16230	18568	17345.7	19390.3	9690.24	9502.45	9011.63	2339.71	2304.84	1403.67	0	0	0	5236.15	2623.33	6559.97	7548	5928.33	10793.5	13066.3	10454.4	12771.1	9734.88	12214.6	10432.8	0	713.561	691.699	0	0
12868	461.168	461.167	461.168	203.295	202.747	203.709	6	6	0	0	0	0	0	0	0	0	0	0	0	0	105939	110007	108935	31098.7	30956	31738.4	0	0	0	0	0	0	0	0	0	0	0	0	0	0	0	9643.47	10394.8	11457.3	0	0	0	0	0
14283	516.172	516.168	516.175	260.706	260.42	261.332	31	31	5009.87	5931.83	5105.3	7419.79	8096.76	8337.39	10505.7	9531.77	10211.2	16135.9	18367.1	17560.2	22247.1	20115.4	20923.2	21828.9	24144.1	25236	1634.38	1641.95	3377.5	2395.63	2799.77	3709.3	5719.73	7466.75	7003.96	7776.06	8698.15	8449.12	13095.5	14130.6	14578.1	17398.4	15441.1	15954.3	3103.91	774.737	3685.95	0	0
16123	587.025	587.021	587.026	200.831	200.419	201.388	9	9	0	0	0	0	0	0	0	0	0	0	0	0	0	0	0	0	0	0	0	0	0	859.83	3216.85	2556.12	1459.36	3740.1	3342.14	3730.11	4704.5	4112.18	4462.4	7347.2	2770.69	3939.16	2730.94	5253.97	681.961	698.512	0	0	0
8368	335.171	335.17	335.172	264.463	263.188	265.528	26	26	5161.28	9708.82	8983.85	8788.61	8707.41	10275.2	9506.92	7798.21	11249.8	13179	9073.25	10805.7	9311.94	9728.9	9435.06	0	0	0	0	0	0	3840.57	5756.63	5034.6	3793.38	5976	5961.7	6585.2	8499.92	4118.29	5359.18	8542.28	10403.8	9333.79	10084.8	11926.2	0	0	0	0	0
14023	505.17	505.168	505.172	257.378	257.203	257.929	5	5	0	0	0	0	0	0	0	0	0	0	0	0	0	0	0	0	0	0	0	0	0	1575.76	694.128	897.715	820.347	931.295	694.552	1614.15	1794.63	2327.75	3577.28	3564.34	5078.56	4105.45	3355.38	5266.54	0	0	0	0	0
5886	279.108	279.107	279.11	156.131	155.571	156.557	29	29	6313.11	5230.62	7942.77	5265.73	9507.84	6253.33	7848.54	7137.17	7562.31	9959.75	8730.52	10066.4	6518.88	7748.88	7179.78	2461.7	3934.15	3493.8	2584	1950.11	1290.7	6269.24	7380.98	9103.06	8427.98	8749.13	7552.32	12502.4	12213.9	11339.6	10205	8105.91	11560.1	9584.8	10564.7	9779.27	3072.6	3046.68	4506.08	3776.67	7180.11
7664	321.156	321.154	321.157	303.855	303.305	304.339	32	32	7726.6	6844.8	7094.26	6099.16	7143.44	9617.74	7697.12	9692.73	9827.05	10390.1	11122.1	12436.4	13910.6	16113.7	14931.3	3611.49	5615.34	4346.35	0	0	0	3578	3395.1	4977.53	4340.73	4758.28	7047.5	5274.68	6728.14	8523.39	7893.6	7307.98	6953.47	10592.2	11859.6	10708.8	0	0	0	0	0
7739	323.135	323.134	323.135	167.45	167.15	168.026	30	30	85123.1	83203.5	92684.3	90303.9	87604	98601.5	91028.9	92499.6	105020	111785	117217	132061	95179.9	87646.8	88809.5	0	739.708	690.567	0	0	766.684	62589	63769.6	75327.1	68441.7	70787.1	74923.5	86492.8	95507.3	98335.6	86898.5	89291.7	98927.4	80352.4	84815.8	91781.7	8331.4	7580.69	6473.56	4968.53	5613.25
8073	329.088	329.086	329.098	138.681	138.034	142.747	35	35	115096	104402	99534.6	104081	98830.5	101135	108777	104462	111674	138345	131062	139231	119286	116628	123151	35073.8	37309.5	40990.5	852.178	0	0	64416.9	65894.5	60192.6	66547.7	66012.8	66108.3	84769.1	81128.6	81851.4	81941.1	78749.8	81262.9	76658.1	83077.6	89093.4	15033.2	7754.42	12426.5	10351.9	3909.76
8261	333.038	333.037	333.04	165.769	163.578	166.645	27	27	15076.5	9854.13	12207.4	6767.12	6648.9	7508.56	10526.8	6767.67	8642.71	9897.84	9483.11	11796.3	10621.3	9246.67	10138.4	692.22	810.768	0	754.518	705.553	742.347	7878.55	10268.1	11585.9	5253.39	4774.36	6645.96	6762.2	8156.15	7548.48	7758.72	7618.98	9147.99	7450.48	8328.69	7799.62	0	0	0	2204.36	1489.11
8481	338.088	338.087	338.089	134.665	134.295	135.468	30	30	186004	184693	196119	191822	188091	190946	207458	204677	219530	209067	221893	241505	208794	195350	196116	0	0	775.008	0	0	0	129724	136696	144313	131585	140721	147526	152938	162468	172732	152189	159953	166505	127054	122523	130622	0	758.411	0	0	0
8516	339.091	339.089	339.092	134.68	134.287	135.468	30	30	30650.9	32905.9	34510.8	32936.9	34348.5	29191.8	27907.8	35158	35832.5	36855.3	39270.7	41572.9	32184.2	33390.5	27416.7	0	0	0	0	0	0	19884.6	22100.5	21539.4	24780.7	23516.5	23255.3	25610.4	26613.2	27935.6	27726.5	21942.5	30869.3	21825.8	22877.1	21628.4	0	0	0	0	0
8594	341.088	341.086	341.089	184.319	183.497	184.772	42	42	94189.8	89626.7	91481.7	78069.3	73768.1	74720.6	73381.9	70755.9	75024	82874.1	84449.5	91959.8	59941.4	59540.9	60540.7	66246.4	66987.6	65803.5	15176.9	14816.2	15036	298943	301536	314378	290304	299198	305806	371371	367668	339695	347807	343906	349430	308870	307522	314905	256682	267504	270796	91919.5	86623.8
8604	341.123	341.121	341.125	262.02	261.448	262.924	31	31	17480.4	17396.3	17080.2	17554.8	15696.3	19046.2	17267.5	14765.6	18739.2	21414	23734.4	22654.8	21616.7	22278.1	23060	14464.4	14984.3	14371	3413.27	6575.46	5258.57	10546.7	12272.6	16010.4	11662.9	16502.9	14188.5	14973.2	15479.5	16472.5	17089.2	13695.5	18385.2	18992.9	17976	18791.8	3598.35	2381.69	2568.09	9684.24	9112.83
9173	355.106	355.104	355.107	158.421	157.178	159.189	9	9	3421.57	4746.63	5015.48	1850.13	3829.19	3361.67	4343.76	2779.22	2772.31	7202.05	5683.53	4286.13	1822.5	2799.6	2341.34	0	0	0	0	0	0	2436.16	4306.78	3138.74	1666.21	1986.78	3139.04	4225.07	4423.47	2676.14	2709.58	3893.07	3982.67	3134.02	2258.29	2726.32	0	0	0	0	0
10047	377.218	377.215	377.219	485.791	485.237	486.314	36	36	43156.6	42997.1	45798.4	40283.1	41743.9	44819.3	46286.6	46147.5	48428.8	43625.3	44650	50064.4	45974.1	43117	45519.4	14890.2	14989.1	14437.1	779.512	0	703.998	34083.5	36734.7	41540.6	35624.5	36091	39883.4	34950.1	36558.5	37748	39466.5	38428.1	41361.7	37245.9	37412.3	36556.7	4162.77	5390.56	3906.57	2664.19	3631.66
10351	385.114	385.113	385.115	190.154	189.641	190.637	36	36	107105	101500	106928	111395	106983	108979	104712	97994.4	106663	115764	121743	123619	108442	101566	101120	75832.1	79512.6	78809.8	0	0	1023.71	85684.9	81980	88326.1	86446.4	88770.3	85440.3	104055	106570	104863	92719.9	90428.7	99749.4	92592.7	89108.8	85429.1	22763.4	23781.2	24225.9	708.666	0
10599	391.107	391.105	391.109	413.012	411.857	413.953	25	25	19757.8	18443.8	17153.9	22099.5	15235.3	21332.8	20144.7	18004.1	20198	21259.4	15501.4	23844.7	15481.3	18765.9	16711.2	16795.9	17857.6	27656.8	11290	17748.8	15777	17031	47928.2	15111.5	16413.2	16880.8	19891.8	18122.7	17033	11680	25407.2	42964.6	14805.3	14090.3	23679.9	28782.7	11350.4	26370.7	12802.6	20009.4	7407.06
11022	403.125	403.122	403.125	215.672	215.395	216.138	39	39	523820	522563	537540	548378	555268	571928	548672	556152	589778	687225	716884	759159	603845	574824	558816	723561	702736	709875	69639.7	65436.4	66305.3	543480	565690	582072	550711	579160	600110	701546	735508	758018	679143	695694	735901	691525	640224	686838	45867.7	41756.4	43178.4	1456.63	3628.26
11096	405.25	405.248	405.256	570.291	561.015	570.826	40	36	115246	118656	115561	115944	112356	119526	122822	126175	142180	122991	124876	136607	107897	102839	98374.3	34580.1	34662.1	35848	7990.27	4824.92	6759.54	72334.9	73609.6	79430.6	73253.4	83856.7	90851.7	77200.2	78226.9	82896.7	79119.7	86406.3	96336.6	73191.5	74287.8	78706.5	25747.2	14663.4	23448.2	5688.16	5670.92
11354	414.104	414.102	414.105	185.076	184.15	185.9	30	30	11164.7	7838.3	9855.49	10700.2	7986.84	10710.8	7664.24	8934.7	9192.18	11723.4	9711.55	9696.17	9312.9	8015.75	6089.48	0	0	0	0	0	0	7834.52	5116.85	7338.78	7405.18	5367.66	7702.24	9239.03	8102.43	8452.31	6746.49	7521.55	6750.85	7101.44	7032.22	6114.87	0	0	0	0	0
11429	415.997	415.996	415.998	179.664	178.771	180.206	6	6	0	0	0	0	0	0	0	0	0	0	0	0	0	0	0	0	0	0	0	0	0	1423.73	0	1862.06	3565.82	724.519	2365.57	2465.15	3814.79	4168.44	4449.86	5400.26	3775.37	2637.32	2344.83	1617.36	0	0	0	0	0
14356	519.111	519.109	519.113	201.058	200.419	201.401	15	15	0	0	0	0	0	0	0	0	0	689.588	0	0	0	0	0	0	0	0	0	0	0	13401	11975.7	12799.2	12639.4	12440.8	14550.9	15445.8	15774.5	16102.9	14458.7	16708.9	15052.6	16871.2	16821.9	18107.1	7796.19	8557.56	7750.92	0	804.907
14743	533.166	533.164	533.167	270.08	269.575	270.328	36	36	60191.8	57077	58315.3	64191.4	65441.7	68437.8	74166.7	72771.3	78475.7	75649.7	78900.7	80940.7	87563.6	86771.2	85063.9	65529.9	58252.1	61495.1	0	0	0	50131.9	52826	55020.4	63733.2	66105.6	65940.5	66433.7	66906.5	71031.3	73128.7	75074.6	77009.1	76501.8	75384.7	75684.4	43838.1	42410.6	46373.3	2796.04	1604.22
16357	598.126	598.121	598.129	211.477	210.736	212.417	40	40	7270.23	3906.89	4107.39	4107.43	5409.99	5226.46	6464.16	5194.34	6971.86	6160.76	5898.62	6102.92	7222.3	7336.01	8201.38	6804.24	5828.76	5733.04	5732.48	5323.21	4010.24	8847.75	9517.54	7612.97	5998.51	9447.97	10015.6	8870.38	9372.61	9816.98	10097.7	8925.82	10105.8	9709.76	10549.8	10331.6	9403.36	8570.78	7643.49	9269.42	8397.19
16747	621.218	621.216	621.22	210.153	209.556	210.391	15	15	0	0	0	0	0	0	0	0	0	0	0	0	0	0	0	0	0	0	0	0	0	6257.1	7665.87	9111.48	6345.29	6521.03	6756.97	7827.53	7019.91	7421.63	6634.37	8069	7542.06	8375.76	9170.57	10668.2	3795.32	994.305	758.831	0	0
17258	651.229	651.226	651.23	218.363	217.897	218.544	6	6	0	0	0	0	0	0	0	0	0	0	0	0	0	0	0	0	786.371	0	0	0	0	3084.35	1834.66	2541.18	3325	2743.84	2975.24	3380.21	3488.39	4207	2529.81	3356.4	3821.22	4237.18	4333.46	3874.54	2328.47	1706.59	2493.09	0	0
20844	861.317	861.314	861.32	262.081	261.385	263.205	18	18	4291.51	5424.93	3699.97	4789.79	3321.19	3817.95	5217.21	3484.32	4740.99	4625.83	3549.7	4980.65	6172.28	5489.71	6368.62	2821.87	3424.11	3999.1	0	0	0	1684.94	2959.14	1479.25	1427.87	0	0	1533.94	833.714	790.991	1477.6	1476.67	1557.31	1397.52	1462.74	1652.63	0	737.643	0	0	0
21270	907.323	907.316	907.325	262.447	261.852	262.924	32	32	12091.6	10021.5	10060.8	8398.72	9504.79	8977.43	10938.3	9398.54	10027.1	12372.6	9802.19	9908.26	12614.9	12051.8	11213.3	8453.38	9493.47	7274.75	0	0	0	5068.39	2865.03	5503.58	5278.41	5288.23	6659.25	3542.42	5609.59	4948.43	6924.68	5245.05	6630.28	6851.79	6517.17	5948.11	2461.71	1586.79	1674.5	0	0
9684	368.098	368.098	368.1	185.594	184.387	185.9	6	6	3496.35	3124.42	1594.47	1615.83	3014.92	3049.99	2450.71	1849.71	1454.69	3557.3	4373.17	3764.4	2635.28	2324.57	1878.57	0	0	0	0	0	0	755.005	1578.17	955.114	1683.18	1566	909.864	701.734	1399.24	1633.34	946.221	1449.68	2171.73	2995.04	1420.09	3280.65	0	0	0	0	0
8854	347.171	347.17	347.172	293.191	292.681	293.863	5	5	6810.34	3485.24	6348.42	7444.49	6882.49	5182.07	7217.74	7220.3	7417.87	7658.61	8825.84	10636.4	8986.96	8224.65	8956.74	0	0	0	0	0	0	1762.06	3255.61	3731.35	3170.37	1971.18	4941.17	3280.62	6300.93	4500.59	6169.33	5540.5	5684.07	6770.11	7302.11	7212.33	0	0	0	0	0
10594	391.08	391.078	391.081	177.549	177.237	178.23	33	33	116356	124599	135575	119661	128617	135789	127175	136188	151439	142632	152871	174117	139266	136089	141398	62802	65978	68729.2	0	0	0	148498	157338	173183	147906	164454	166073	176601	194745	202294	170629	182008	199665	179896	191928	200241	751.33	0	2114.01	4697.92	2738.04
15584	564.691	564.686	564.696	32.4549	31.8129	33.3431	16	16	26125.8	25567.5	26329.3	30110.5	37658.8	25712.2	29718.4	30156.1	27082.8	24825.9	29402.5	29666.7	38383	35651	40166.6	20638.2	18518.4	20224.8	22124.9	22140.5	24020.6	22778	34419.4	31033.7	25375.8	37276.3	34086.5	38313.3	37264.7	31907.4	29416.6	31000.5	34421.8	27810.6	36649.1	29947	14010.4	18028.6	18294.3	12848.5	18874.4
20544	831.198	831.196	831.201	288.638	288.3	289.208	14	14	863.323	719.833	707.086	0	0	835.948	757.28	0	0	0	690.45	0	836.588	0	773.16	0	730.856	0	0	0	0	2832.62	5879.27	5082.62	8806.87	8241.19	9680.72	7161.04	8579.14	7620.47	8655.97	8015.4	8857.7	9880.96	9003.73	7907	1614.52	2771.6	1413.48	0	0
20939	872.561	872.55	872.564	842.066	837.846	845.898	15	15	56761.4	120186	39254.1	12276.3	235007	25549.8	36875.2	316579	10121.5	35389.4	169852	12208.2	341508	161616	51584.5	292055	139849	37830.3	0	0	0	51760.9	231162	30552.5	984.772	149018	61358.5	17679.8	155625	109412	1050.71	126419	111835	330068	99088	28724.1	118590	72127.9	19238.7	0	0
[truncated: 5 more columns]
