# Supplementary material for: Secreted Rhizobacterial β-Glucosidase Unlocks Coumarin-Mediated Root Iron Uptake
Source: Research Square preprint supplement (doi:10.21203/rs.3.rs-5909771/v1), 2025-02-20
Supplement: Supplementary file 13 [file f057fff443e69e9d099cfec3.xlsx]

## Sheet: Sheet1
Supplemental Table 7. Identification of glycosylated metabolites in root exudates of Arabidopsis (left) and SynCom incubation (right).
Arabidose/Xylose	Glucose/galactose	Rhamnose	Glucuronic_acid	Count.		Arabidose/Xylose	Glucose/galactose	Rhamnose	Glucuronic_acid	Count.
TRUE	TRUE	TRUE	TRUE	3		TRUE	TRUE	TRUE	TRUE	3
FALSE	TRUE	TRUE	TRUE	6		FALSE	TRUE	TRUE	TRUE	4
TRUE	FALSE	TRUE	TRUE	1		TRUE	FALSE	TRUE	TRUE	0
FALSE	FALSE	TRUE	TRUE	16		FALSE	FALSE	TRUE	TRUE	2
TRUE	TRUE	FALSE	TRUE	13		TRUE	TRUE	FALSE	TRUE	2
FALSE	TRUE	FALSE	TRUE	37		FALSE	TRUE	FALSE	TRUE	6
TRUE	FALSE	FALSE	TRUE	30		TRUE	FALSE	FALSE	TRUE	4
FALSE	FALSE	FALSE	TRUE	302		FALSE	FALSE	FALSE	TRUE	27
TRUE	TRUE	TRUE	FALSE	16		TRUE	TRUE	TRUE	FALSE	4
FALSE	TRUE	TRUE	FALSE	72		FALSE	TRUE	TRUE	FALSE	20
TRUE	FALSE	TRUE	FALSE	61		TRUE	FALSE	TRUE	FALSE	9
FALSE	FALSE	TRUE	FALSE	678		FALSE	FALSE	TRUE	FALSE	88
TRUE	TRUE	FALSE	FALSE	71		TRUE	TRUE	FALSE	FALSE	14
FALSE	TRUE	FALSE	FALSE	1177		FALSE	TRUE	FALSE	FALSE	181
TRUE	FALSE	FALSE	FALSE	530		TRUE	FALSE	FALSE	FALSE	76
