# Supplementary material for: Secreted Rhizobacterial β-Glucosidase Unlocks Coumarin-Mediated Root Iron Uptake
Source: Research Square preprint supplement (doi:10.21203/rs.3.rs-5909771/v1), 2025-02-20
Supplement: Supplementary file 14 [file f87464c755d46f18cbed4f41.xlsx]

## Sheet: Sheet1
Supplemental Table 3. Number and abundance of OTUs specially modulized in each Arabidopsis mutant
Sample	OTUs	Mean abundance	Kingdom	Phylum	Class	Order	Family	Genus	Species
cse	OTU_347	119	Bacteria	Actinobacteria	Actinobacteria	Actinomycetales	Micromonosporaceae	Couchioplanes	Couchioplanes_caeruleus_subsp._azureus
cse	OTU_60	1788	Bacteria	Actinobacteria	Actinobacteria	Actinomycetales	Pseudonocardiaceae	Lentzea	Actinosynnema_mirum
cse	OTU_201	562.6	Bacteria	Actinobacteria	Actinobacteria	Actinomycetales	Nocardioidaceae	Nocardioides	Nocardioides_caricicola
cse	OTU_13	7528.7	Bacteria	Actinobacteria	Actinobacteria	Actinomycetales	Streptomycetaceae	Streptomyces	Streptomyces_mutomycini
cse	OTU_37	2372.5	Bacteria	Actinobacteria	Actinobacteria	Actinomycetales	Streptomycetaceae	Streptomyces	Streptomyces_torulosus
cse	OTU_951	29	Bacteria	Actinobacteria	Actinobacteria	Actinomycetales	Nocardioidaceae	Nocardioides	Nocardioides_kribbensis
cse	OTU_65	1352.5	Bacteria	Actinobacteria	Actinobacteria	Actinomycetales	Nocardioidaceae	Nocardioides	Nocardioides_furvisabuli
cse	OTU_122	999.3	Bacteria	Actinobacteria	Actinobacteria	Actinomycetales	Pseudonocardiaceae	Actinosynnema	Actinosynnema_mirum
cse	OTU_163	510.6	Bacteria	Actinobacteria	Actinobacteria	Actinomycetales	Nocardioidaceae	Nocardioides	Nocardioides_furvisabuli
cse	OTU_86	1013.1	Bacteria	Actinobacteria	Actinobacteria	Actinomycetales	Nocardioidaceae	Nocardioides	Nocardioides_albus
cse	OTU_111	869.9	Bacteria	Actinobacteria	Actinobacteria	Actinomycetales	Pseudonocardiaceae	Lentzea	Lentzea_flaviverrucosa
cse	OTU_461	163.1	Bacteria	Actinobacteria	Actinobacteria	Actinomycetales	Nocardioidaceae	Nocardioides	Nocardioides_exalbidus
cse	OTU_1048	25	Bacteria	Actinobacteria	Actinobacteria	Actinomycetales	Nocardioidaceae	Nocardioides	Nocardioides_caeni
cse	OTU_355	77	Bacteria	Actinobacteria	Actinobacteria	Actinomycetales	Nocardioidaceae	Nocardioides	Nocardioides_caeni
cse	OTU_243	421.8	Bacteria	Actinobacteria	Actinobacteria	Actinomycetales	Pseudonocardiaceae	Lentzea	Lentzea_flaviverrucosa
cse	OTU_580	93.1	Bacteria	Actinobacteria	Actinobacteria	Actinomycetales	Streptomycetaceae	Streptomyces	Streptomyces_albiflavescens
cse	OTU_68	1659.6	Bacteria	Actinobacteria	Actinobacteria	Actinomycetales	Pseudonocardiaceae	Lentzea	Lentzea_flaviverrucosa
cse	OTU_207	321.2	Bacteria	Actinobacteria	Actinobacteria	Actinomycetales	Streptomycetaceae	Streptomyces	Streptomyces_pseudovenezuelae
cse	OTU_313	194.3	Bacteria	Actinobacteria	Actinobacteria	Actinomycetales	Nocardioidaceae	Nocardioides	Nocardioides_furvisabuli
cse	OTU_941	60.1	Bacteria	Actinobacteria	Actinobacteria	Actinomycetales	Promicromonosporaceae	Isoptericola	Isoptericola_dokdonensis
cse	OTU_1221	26.6	Bacteria	Actinobacteria	Actinobacteria	Actinomycetales	Streptomycetaceae	Streptomyces	Streptomyces_durhamensis
cse	OTU_365	177.7	Bacteria	Actinobacteria	Actinobacteria	Actinomycetales	Nocardioidaceae	Nocardioides	Nocardioides_terrigena
cse	OTU_116	762	Bacteria	Actinobacteria	Actinobacteria	Actinomycetales	Pseudonocardiaceae	Lentzea	Lentzea_albida
cse	OTU_105	684.8	Bacteria	Actinobacteria	Actinobacteria	Actinomycetales	Pseudonocardiaceae	Lentzea	Lentzea_albida
cse	OTU_316	253.5	Bacteria	Actinobacteria	Actinobacteria	Actinomycetales	Promicromonosporaceae	Promicromonospora	Promicromonospora_xylanilytica
cse	OTU_2975	6.7	Bacteria	Actinobacteria	Actinobacteria	Actinomycetales	Micrococcaceae	Arthrobacter	Arthrobacter_pascens
cse	OTU_217	303.6	Bacteria	Actinobacteria	Actinobacteria	Actinomycetales	Nocardioidaceae	Nocardioides	Nocardioides_albus
cse	OTU_489	207.9	Bacteria	Actinobacteria	Actinobacteria	Actinomycetales	Pseudonocardiaceae	Lechevalieria	Lechevalieria_nigeriaca
cse	OTU_575	114.6	Bacteria	Actinobacteria	Actinobacteria	Actinomycetales	Micromonosporaceae	Luedemannella	Luedemannella_helvata
cse	OTU_143	446.6	Bacteria	Actinobacteria	Actinobacteria	Actinomycetales	Pseudonocardiaceae	Lentzea	Lentzea_jiangxiensis
cse	OTU_1501	15.6	Bacteria	Actinobacteria	Actinobacteria	Actinomycetales	Intrasporangiaceae	Intrasporangium	Intrasporangium_oryzae
cse	OTU_900	32.6	Bacteria	Actinobacteria	Actinobacteria	Actinomycetales	Nocardioidaceae	Nocardioides	Nocardioides_terrigena
cse	OTU_627	69.1	Bacteria	Actinobacteria	Actinobacteria	Actinomycetales	Micromonosporaceae	Catelliglobosispora	Catelliglobosispora_koreensis
cse	OTU_946	52.4	Bacteria	Actinobacteria	Actinobacteria	Actinomycetales	Streptomycetaceae	Streptomyces	Streptomyces_deccanensis
cse	OTU_2175	8.2	Bacteria	Actinobacteria	Actinobacteria	Actinomycetales	Streptomycetaceae	Streptomyces	Streptomyces_capoamus
cse	OTU_879	34.7	Bacteria	Actinobacteria	Actinobacteria	Actinomycetales	Micromonosporaceae	Catelliglobosispora	Catelliglobosispora_koreensis
cse	OTU_4559	24	Bacteria	Actinobacteria	Actinobacteria	Actinomycetales	Nocardioidaceae	Nocardioides	Nocardioides_mesophilus
cse	OTU_5875	33.2	Bacteria	Actinobacteria	Actinobacteria	Actinomycetales	Thermomonosporaceae	Actinocorallia	Actinocorallia_herbida
cse	OTU_1649	12.1	Bacteria	Actinobacteria	Actinobacteria	Actinomycetales	Nocardioidaceae	Marmoricola	Marmoricola_bigeumensis
cse	OTU_477	62.1	Bacteria	Actinobacteria	Actinobacteria	Acidimicrobiales	Iamiaceae	Iamia	Iamia_majanohamensis
cse	OTU_1355	22.9	Bacteria	Actinobacteria	Actinobacteria	Actinomycetales	Nocardioidaceae	Nocardioides	Nocardioides_terrigena
cse	OTU_3865	9.6	Bacteria	Actinobacteria	Actinobacteria	Actinomycetales	Micromonosporaceae	Catelliglobosispora	Catelliglobosispora_koreensis
cse	OTU_1206	26.9	Bacteria	Actinobacteria	Actinobacteria	Actinomycetales	Nocardioidaceae	Nocardioides	Nocardioides_furvisabuli
cse	OTU_704	120.7	Bacteria	Actinobacteria	Actinobacteria	Actinomycetales	Pseudonocardiaceae	Lechevalieria	Lechevalieria_nigeriaca
cse	OTU_1298	14	Bacteria	Actinobacteria	Actinobacteria	Actinomycetales	Intrasporangiaceae	Knoellia	Knoellia_locipacati
cse	OTU_572	70.5	Bacteria	Actinobacteria	Actinobacteria	Actinomycetales	Pseudonocardiaceae	Lechevalieria	Lechevalieria_nigeriaca
cse	OTU_1259	20.2	Bacteria	Actinobacteria	Actinobacteria	Actinomycetales	Streptomycetaceae	Streptomyces	Streptomyces_albiflavescens
cse	OTU_4885	11.2	Bacteria	Actinobacteria	Actinobacteria	Actinomycetales	Pseudonocardiaceae	Allokutzneria	Allokutzneria_multivorans
cse	OTU_2413	14.1	Bacteria	Actinobacteria	Actinobacteria	Actinomycetales	Nocardioidaceae	Nocardioides	Nocardioides_furvisabuli
cse	OTU_2127	9	Bacteria	Actinobacteria	Actinobacteria	Actinomycetales	Micromonosporaceae	Actinoplanes	Actinoplanes_italicus
cse	OTU_1346	21.2	Bacteria	Actinobacteria	Actinobacteria	Actinomycetales	Nocardioidaceae	Nocardioides	Nocardioides_terrigena
cse	OTU_246	246.1	Bacteria	Actinobacteria	Actinobacteria	Actinomycetales	Micromonosporaceae	Actinoplanes	Actinoplanes_capillaceus
cse	OTU_1840	9.2	Bacteria	Actinobacteria	Actinobacteria	Actinomycetales	Nocardioidaceae	Nocardioides	Nocardioides_terrigena
cse	OTU_1215	33.5	Bacteria	Actinobacteria	Actinobacteria	Actinomycetales	Nocardioidaceae	Nocardioides	Nocardioides_furvisabuli
cse	OTU_3073	7.4	Bacteria	Actinobacteria	Actinobacteria	Actinomycetales	Streptomycetaceae	Streptomyces	Streptomyces_albiflavescens
cse	OTU_211	187.1	Bacteria	Bacteroidetes	Cytophagia	Cytophagales	Cyclobacteriaceae	Chryseolinea	Chryseolinea_serpens
cse	OTU_245	112.6	Bacteria	Bacteroidetes	Cytophagia	Cytophagales	Cytophagaceae	Chryseolinea	Chryseolinea_serpens
cse	OTU_1492	11.6	Bacteria	Bacteroidetes	Cytophagia	Cytophagales	Unassigned	Ohtaekwangia	Ohtaekwangia_kribbensis
cse	OTU_568	41.9	Bacteria	Bacteroidetes	Cytophagia	Cytophagales	Flammeovirgaceae	Chryseolinea	Chryseolinea_serpens
cse	OTU_840	53.7	Bacteria	Bacteroidetes	Cytophagia	Cytophagales	Unassigned	Ohtaekwangia	Ohtaekwangia_koreensis
cse	OTU_1428	69.3	Bacteria	Bacteroidetes	Cytophagia	Cytophagales	Cytophagaceae	Ohtaekwangia	Ohtaekwangia_koreensis
cse	OTU_759	8.9	Bacteria	Bacteroidetes	Cytophagia	Cytophagales	Flammeovirgaceae	Chryseolinea	Chryseolinea_serpens
cse	OTU_1074	13.5	Bacteria	Bacteroidetes	Cytophagia	Cytophagales	Cyclobacteriaceae	Chryseolinea	Chryseolinea_serpens
cse	OTU_678	70.1	Bacteria	Bacteroidetes	Cytophagia	Cytophagales	Unassigned	Ohtaekwangia	Ohtaekwangia_koreensis
cse	OTU_2530	7.9	Bacteria	Bacteroidetes	Sphingobacteriia	Sphingobacteriales	Sphingobacteriaceae	Pedobacter	Phaeocystidibacter_luteus
cse	OTU_2211	13	Bacteria	Bacteroidetes	Cytophagia	Cytophagales	Cytophagaceae	Chryseolinea	Chryseolinea_serpens
cse	OTU_2544	12.2	Bacteria	Bacteroidetes	Cytophagia	Cytophagales	Cytophagaceae	Ohtaekwangia	Ohtaekwangia_koreensis
cse	OTU_1067	30.6	Bacteria	Bacteroidetes	Sphingobacteriia	Sphingobacteriales	Sphingobacteriaceae	Pedobacter	Pedobacter_bauzanensis
cse	OTU_685	47	Bacteria	Bacteroidetes	Flavobacteriia	Flavobacteriales	Flavobacteriaceae	Flavobacterium	Flavobacterium_cauense
cse	OTU_2621	16.5	Bacteria	Bacteroidetes	Cytophagia	Cytophagales	Cyclobacteriaceae	Algoriphagus	Algoriphagus_aquaeductus
cse	OTU_147	298.6	Bacteria	Chloroflexi	Chloroflexia	Herpetosiphonales	Herpetosiphonaceae	Herpetosiphon	Cystobacter_badius
cse	OTU_1164	44.3	Bacteria	Chloroflexi	Chloroflexia	Chloroflexales	Chloroflexaceae	Roseiflexus	Roseiflexus_castenholzii
cse	OTU_583	58.2	Bacteria	Chloroflexi	Chloroflexia	Herpetosiphonales	Herpetosiphonaceae	Herpetosiphon	Xanthomonas_bromi
cse	OTU_1106	31.9	Bacteria	Chloroflexi	Chloroflexia	Herpetosiphonales	Herpetosiphonaceae	Herpetosiphon	Vulcaniibacterium_thermophilum
cse	OTU_3139	7.1	Bacteria	Chloroflexi	Chloroflexia	Herpetosiphonales	Herpetosiphonaceae	Herpetosiphon	Cystobacter_badius
cse	OTU_5683	11.6	Bacteria	Firmicutes	Bacilli	Bacillales	Thermoactinomycetaceae_1	Thermoactinomyces	Thermoactinomyces_intermedius
cse	OTU_1852	9	Bacteria	Planctomycetes	Planctomycetia	Planctomycetales	Planctomycetaceae	Rhodopirellula	Rhodopirellula_rosea
cse	OTU_17	5399.9	Bacteria	Proteobacteria	Betaproteobacteria	Burkholderiales	Pseudomonadaceae	Rhizobacter	Piscinibacter_aquaticus
cse	OTU_25	4517	Bacteria	Proteobacteria	Betaproteobacteria	Burkholderiales	Comamonadaceae	Hydrogenophaga	Hydrogenophaga_intermedia
cse	OTU_372	134.9	Bacteria	Proteobacteria	Gammaproteobacteria	Xanthomonadales	Xanthomonadaceae	Lysobacter	Lysobacter_yangpyeongensis
cse	OTU_92	1044.7	Bacteria	Proteobacteria	Betaproteobacteria	Burkholderiales	Burkholderiales_incertae_sedis	Ideonella	Ideonella_dechloratans
cse	OTU_151	713.3	Bacteria	Proteobacteria	Alphaproteobacteria	Rhizobiales	Hyphomicrobiaceae	Devosia	Devosia_chinhatensis
cse	OTU_47	1778.3	Bacteria	Proteobacteria	Gammaproteobacteria	Pseudomonadales	Pseudomonadaceae	Pseudomonas	Pseudomonas_marincola
cse	OTU_50	2346.7	Bacteria	Proteobacteria	Alphaproteobacteria	Rhizobiales	Hyphomicrobiaceae	Devosia	Devosia_chinhatensis
cse	OTU_54	1630.4	Bacteria	Proteobacteria	Betaproteobacteria	Burkholderiales	Burkholderiales_incertae_sedis	Ideonella	Kinneretia_asaccharophila
cse	OTU_3469	250.4	Bacteria	Proteobacteria	Deltaproteobacteria	Myxococcales	Haliangiaceae	Haliangium	Haliangium_ochraceum
cse	OTU_15	8660	Bacteria	Proteobacteria	Gammaproteobacteria	Pseudomonadales	Pseudomonadaceae	Rhizobacter	Aquabacterium_limnoticum
cse	OTU_1101	24.7	Bacteria	Proteobacteria	Alphaproteobacteria	Sphingomonadales	Sphingomonadaceae	Sphingomonas	Sphingomonas_sediminicola
cse	OTU_891	25.2	Bacteria	Proteobacteria	Deltaproteobacteria	Myxococcales	Sandaracinaceae	Sandaracinus	Sandaracinus_amylolyticus
cse	OTU_623	35.9	Bacteria	Proteobacteria	Deltaproteobacteria	Myxococcales	Haliangiaceae	Haliangium	Haliangium_tepidum
cse	OTU_64	1135.9	Bacteria	Proteobacteria	Betaproteobacteria	Burkholderiales	Pseudomonadaceae	Rhizobacter	Piscinibacter_aquaticus
cse	OTU_305	216	Bacteria	Proteobacteria	Alphaproteobacteria	Rhizobiales	Hyphomicrobiaceae	Devosia	Devosia_pacifica
cse	OTU_618	120.5	Bacteria	Proteobacteria	Deltaproteobacteria	Myxococcales	Polyangiaceae	Chondromyces	Chondromyces_crocatus
cse	OTU_150	345.1	Bacteria	Proteobacteria	Deltaproteobacteria	Myxococcales	Sandaracinaceae	Sandaracinus	Sandaracinus_amylolyticus
cse	OTU_87	853.3	Bacteria	Proteobacteria	Alphaproteobacteria	Caulobacterales	Caulobacteraceae	Brevundimonas	Brevundimonas_basaltis
cse	OTU_1515	22.3	Bacteria	Proteobacteria	Betaproteobacteria	Burkholderiales	Comamonadaceae	Caenimonas	Caenimonas_terrae
cse	OTU_71	1562.5	Bacteria	Proteobacteria	Betaproteobacteria	Burkholderiales	Oxalobacteraceae	Massilia	Massilia_aerilata
cse	OTU_260	165.7	Bacteria	Proteobacteria	Deltaproteobacteria	Myxococcales	Haliangiaceae	Haliangium	Haliangium_tepidum
cse	OTU_1408	304.7	Bacteria	Proteobacteria	Betaproteobacteria	Burkholderiales	Pseudomonadaceae	Rhizobacter	Piscinibacter_aquaticus
cse	OTU_783	26.8	Bacteria	Proteobacteria	Deltaproteobacteria	Myxococcales	Haliangiaceae	Haliangium	Haliangium_tepidum
cse	OTU_242	225.7	Bacteria	Proteobacteria	Alphaproteobacteria	Rhizobiales	Hyphomicrobiaceae	Devosia	Devosia_pacifica
cse	OTU_482	100.9	Bacteria	Proteobacteria	Alphaproteobacteria	Sphingomonadales	Erythrobacteraceae	Erythrobacter	Erythrobacter_citreus
cse	OTU_2077	24.7	Bacteria	Proteobacteria	Betaproteobacteria	Burkholderiales	Comamonadaceae	Pelomonas	Sphaerotilus_hippei
cse	OTU_994	91.2	Bacteria	Proteobacteria	Betaproteobacteria	Burkholderiales	Burkholderiales_incertae_sedis	Aquincola	Aquincola_tertiaricarbonis
cse	OTU_1589	13.6	Bacteria	Proteobacteria	Alphaproteobacteria	Lactobacillales	Rhodospirillaceae	Anaeromyxobacter	Anaeromyxobacter_dehalogenans
cse	OTU_327	154.6	Bacteria	Proteobacteria	Gammaproteobacteria	Xanthomonadales	Xanthomonadaceae	Lysobacter	Lysobacter_enzymogenes
cse	OTU_431	93.1	Bacteria	Proteobacteria	Deltaproteobacteria	Myxococcales	Haliangiaceae	Haliangium	Haliangium_tepidum
cse	OTU_166	323.8	Bacteria	Proteobacteria	Deltaproteobacteria	Myxococcales	Polyangiaceae	Polyangium	Phaselicystis_flava
cse	OTU_409	80.3	Bacteria	Proteobacteria	Deltaproteobacteria	Myxococcales	Desulfuromonadaceae	Haliangium	Haliangium_tepidum
cse	OTU_232	180.4	Bacteria	Proteobacteria	Deltaproteobacteria	Myxococcales	Haliangiaceae	Haliangium	Haliangium_tepidum
cse	OTU_3112	7.5	Bacteria	Proteobacteria	Betaproteobacteria	Burkholderiales	Burkholderiaceae	Burkholderia	Thiobacillus_aquaesulis
cse	OTU_314	138	Bacteria	Proteobacteria	Gammaproteobacteria	Xanthomonadales	Xanthomonadaceae	Lysobacter	Lysobacter_xinjiangensis
cse	OTU_876	33.8	Bacteria	Proteobacteria	Gammaproteobacteria	Pseudomonadales	Pseudomonadaceae	Rhizobacter	Piscinibacter_aquaticus
cse	OTU_414	98.7	Bacteria	Proteobacteria	Gammaproteobacteria	Pseudomonadales	Pseudomonadaceae	Rhizobacter	Sphaerotilus_hippei
cse	OTU_882	83	Bacteria	Proteobacteria	Bacilli	Bacillales	Bacillaceae_1	Bacillus	Magnetospira_thiophila
cse	OTU_496	116.9	Bacteria	Proteobacteria	Betaproteobacteria	Burkholderiales	Comamonadaceae	Acidovorax	Caenimonas_terrae
cse	OTU_299	171.1	Bacteria	Proteobacteria	Deltaproteobacteria	Myxococcales	Haliangiaceae	Haliangium	Haliangium_tepidum
cse	OTU_191	439.5	Bacteria	Proteobacteria	Alphaproteobacteria	Rhizobiales	Hyphomicrobiaceae	Devosia	Devosia_pacifica
cse	OTU_257	191.8	Bacteria	Proteobacteria	Gammaproteobacteria	Xanthomonadales	Xanthomonadaceae	Lysobacter	Lysobacter_terrae
cse	OTU_95	876.7	Bacteria	Proteobacteria	Gammaproteobacteria	Pseudomonadales	Pseudomonadaceae	Rhizobacter	Ramlibacter_henchirensis
cse	OTU_1376	27.3	Bacteria	Proteobacteria	Betaproteobacteria	Burkholderiales	Comamonadaceae	Ramlibacter	Ramlibacter_henchirensis
cse	OTU_179	316	Bacteria	Proteobacteria	Deltaproteobacteria	Myxococcales	Nannocystaceae	Chondromyces	Chondromyces_crocatus
cse	OTU_198	214.1	Bacteria	Proteobacteria	Gammaproteobacteria	Xanthomonadales	Xanthomonadaceae	Lysobacter	Lysobacter_panaciterrae
cse	OTU_160	449.1	Bacteria	Proteobacteria	Betaproteobacteria	Burkholderiales	Comamonadaceae	Hydrogenophaga	Hydrogenophaga_palleronii
cse	OTU_612	46.8	Bacteria	Proteobacteria	Gammaproteobacteria	Xanthomonadales	Sinobacteraceae	Steroidobacter	Steroidobacter_denitrificans
cse	OTU_136	497.3	Bacteria	Proteobacteria	Gammaproteobacteria	Xanthomonadales	Xanthomonadaceae	Lysobacter	Stenotrophomonas_chelatiphaga
cse	OTU_947	48.8	Bacteria	Proteobacteria	Alphaproteobacteria	Desulfuromonadales	Chloroplast	Streptophyta	Novispirillum_itersonii_subsp._nipponicum
cse	OTU_1574	13.7	Bacteria	Proteobacteria	Gammaproteobacteria	Xanthomonadales	Xanthomonadaceae	Lysobacter	Lysobacter_defluvii
cse	OTU_436	65.3	Bacteria	Proteobacteria	Deltaproteobacteria	Myxococcales	Polyangiaceae	Phaselicystis	Phaselicystis_flava
cse	OTU_326	174.2	Bacteria	Proteobacteria	Gammaproteobacteria	Xanthomonadales	Xanthomonadaceae	Lysobacter	Lysobacter_enzymogenes
cse	OTU_219	237.2	Bacteria	Proteobacteria	Deltaproteobacteria	Myxococcales	Polyangiaceae	Phaselicystis	Phaselicystis_flava
cse	OTU_221	352.3	Bacteria	Proteobacteria	Gammaproteobacteria	Pseudomonadales	Pseudomonadaceae	Permianibacter	Permianibacter_aggregans
cse	OTU_395	72.2	Bacteria	Proteobacteria	Gammaproteobacteria	Xanthomonadales	Sinobacteraceae	Steroidobacter	Steroidobacter_agariperforans
cse	OTU_1280	13.4	Bacteria	Proteobacteria	Deltaproteobacteria	Desulfuromonadales	Geobacteraceae	Geobacter	Geobacter_pickeringii
cse	OTU_172	360.5	Bacteria	Proteobacteria	Gammaproteobacteria	Pseudomonadales	Pseudomonadaceae	Pseudomonas	Pseudomonas_alcaligenes
cse	OTU_1056	26.1	Bacteria	Proteobacteria	Deltaproteobacteria	Myxococcales	Polyangiaceae	Chondromyces	Phaselicystis_flava
cse	OTU_1175	35.2	Bacteria	Proteobacteria	Deltaproteobacteria	Myxococcales	Phaselicystidaceae	Phaselicystis	Phaselicystis_flava
cse	OTU_1187	18.5	Bacteria	Proteobacteria	Alphaproteobacteria	Rhizobiales	Phyllobacteriaceae	Mesorhizobium	Mesorhizobium_camelthorni
cse	OTU_606	47.4	Bacteria	Proteobacteria	Gammaproteobacteria	Xanthomonadales	Xanthomonadaceae	Fulvimonas	Fulvimonas_yonginensis
cse	OTU_381	96	Bacteria	Proteobacteria	Gammaproteobacteria	Xanthomonadales	Xanthomonadaceae	Lysobacter	Luteimonas_aestuarii
cse	OTU_311	180.2	Bacteria	Proteobacteria	Betaproteobacteria	Burkholderiales	Burkholderiales_incertae_sedis	Ideonella	Ideonella_dechloratans
cse	OTU_1123	17.1	Bacteria	Proteobacteria	Deltaproteobacteria	Myxococcales	Haliangiaceae	Haliangium	Haliangium_tepidum
cse	OTU_483	87.9	Bacteria	Proteobacteria	Alphaproteobacteria	Rhizobiales	Rhizobiaceae	Rhizobium	Rhizobium_daejeonense
cse	OTU_398	167.4	Bacteria	Proteobacteria	Alphaproteobacteria	Desulfuromonadales	Chloroplast	Streptophyta	Novispirillum_itersonii_subsp._nipponicum
cse	OTU_422	154.3	Bacteria	Proteobacteria	Alphaproteobacteria	Rhizobiales	Chloroplast	Streptophyta	Geobacter_toluenoxydans
cse	OTU_170	380.6	Bacteria	Proteobacteria	Alphaproteobacteria	Rhizobiales	Hyphomicrobiaceae	Devosia	Devosia_pacifica
cse	OTU_361	180.6	Bacteria	Proteobacteria	Gammaproteobacteria	Xanthomonadales	Xanthomonadaceae	Lysobacter	Lysobacter_terrae
cse	OTU_838	99.3	Bacteria	Proteobacteria	Betaproteobacteria	Burkholderiales	Burkholderiales_incertae_sedis	Tepidimonas	Kinneretia_asaccharophila
cse	OTU_1564	12	Bacteria	Proteobacteria	Gammaproteobacteria	Xanthomonadales	Xanthomonadaceae	Dokdonella	Dokdonella_soli
cse	OTU_1555	13	Bacteria	Proteobacteria	Deltaproteobacteria	Myxococcales	Nannocystaceae	Nannocystis	Nannocystis_exedens
cse	OTU_446	108.6	Bacteria	Proteobacteria	Deltaproteobacteria	Myxococcales	Polyangiaceae	Chondromyces	Phaselicystis_flava
cse	OTU_460	102.5	Bacteria	Proteobacteria	Gammaproteobacteria	Xanthomonadales	Xanthomonadaceae	Lysobacter	Lysobacter_xinjiangensis
cse	OTU_1273	19.4	Bacteria	Proteobacteria	Betaproteobacteria	Burkholderiales	Burkholderiales_incertae_sedis	Ideonella	Ideonella_azotifigens
cse	OTU_1216	22.4	Bacteria	Proteobacteria	Betaproteobacteria	Burkholderiales	Burkholderiales_incertae_sedis	Rhizobacter	Aquabacterium_limnoticum
cse	OTU_1329	13.1	Bacteria	Proteobacteria	Deltaproteobacteria	Myxococcales	Haliangiaceae	Haliangium	Haliangium_tepidum
cse	OTU_74	1541.3	Bacteria	Proteobacteria	Betaproteobacteria	Burkholderiales	Oxalobacteraceae	Massilia	Massilia_plicata
cse	OTU_420	71.6	Bacteria	Proteobacteria	Deltaproteobacteria	Myxococcales	Haliangiaceae	Haliangium	Haliangium_tepidum
cse	OTU_1370	15	Bacteria	Proteobacteria	Alphaproteobacteria	Sphingomonadales	Sphingomonadaceae	Sphingosinicella	Sphingosinicella_vermicomposti
cse	OTU_457	56.2	Bacteria	Proteobacteria	Gammaproteobacteria	Xanthomonadales	Xanthomonadaceae	Fulvimonas	Fulvimonas_soli
cse	OTU_1105	46.7	Bacteria	Proteobacteria	Betaproteobacteria	Burkholderiales	Comamonadaceae	Curvibacter	Curvibacter_fontanus
cse	OTU_605	52	Bacteria	Proteobacteria	Deltaproteobacteria	Desulfuromonadales	Geobacteraceae	Geobacter	Sandaracinus_amylolyticus
cse	OTU_522	79	Bacteria	Proteobacteria	Alphaproteobacteria	Rhizobiales	Rhizobiaceae	Ensifer	Rhizobium_subbaraonis
cse	OTU_705	64.8	Bacteria	Proteobacteria	Gammaproteobacteria	Xanthomonadales	Xanthomonadaceae	Arenimonas	Arenimonas_metalli
cse	OTU_2160	11.1	Bacteria	Proteobacteria	Deltaproteobacteria	Myxococcales	Polyangiaceae	Chondromyces	Phaselicystis_flava
cse	OTU_564	69.5	Bacteria	Proteobacteria	Alphaproteobacteria	Sphingomonadales	Erythrobacteraceae	Erythrobacter	Erythrobacter_citreus
cse	OTU_239	278.9	Bacteria	Proteobacteria	Gammaproteobacteria	Xanthomonadales	Xanthomonadaceae	Arenimonas	Arenimonas_metalli
cse	OTU_586	59.7	Bacteria	Proteobacteria	Alphaproteobacteria	Rhizobiales	Hyphomicrobiaceae	Devosia	Devosia_pacifica
cse	OTU_1359	29.9	Bacteria	Proteobacteria	Gammaproteobacteria	Pseudomonadales	Pseudomonadaceae	Permianibacter	Permianibacter_aggregans
cse	OTU_970	33.5	Bacteria	Proteobacteria	Deltaproteobacteria	Myxococcales	Phaselicystidaceae	Phaselicystis	Phaselicystis_flava
cse	OTU_696	42.7	Bacteria	Proteobacteria	Deltaproteobacteria	Myxococcales	Sandaracinaceae	Sandaracinus	Sandaracinus_amylolyticus
cse	OTU_1073	21.1	Bacteria	Proteobacteria	Deltaproteobacteria	Myxococcales	Haliangiaceae	Haliangium	Haliangium_tepidum
cse	OTU_4764	14.1	Bacteria	Proteobacteria	Betaproteobacteria	Burkholderiales	Comamonadaceae	Acidovorax	Ramlibacter_tataouinensis
cse	OTU_915	36.9	Bacteria	Proteobacteria	Deltaproteobacteria	Myxococcales	Myxococcaceae	Corallococcus	Corallococcus_coralloides
cse	OTU_1043	67.6	Bacteria	Proteobacteria	Alphaproteobacteria	Sphingomonadales	Sphingomonadaceae	Parasphingopyxis	Parasphingopyxis_lamellibrachiae
cse	OTU_649	47.1	Bacteria	Proteobacteria	Gammaproteobacteria	Xanthomonadales	Xanthomonadaceae	Lysobacter	Lysobacter_dokdonensis
cse	OTU_1181	15.3	Bacteria	Proteobacteria	Gammaproteobacteria	Xanthomonadales	Sinobacteraceae	Steroidobacter	Steroidobacter_agariperforans
cse	OTU_1201	47.1	Bacteria	Proteobacteria	Alphaproteobacteria	Rhizobiales	Piscirickettsiaceae	Thiomicrospira	Thiomicrospira_chilensis
cse	OTU_1469	11	Bacteria	Proteobacteria	Alphaproteobacteria	Sphingomonadales	Erythrobacteraceae	Porphyrobacter	Porphyrobacter_tepidarius
cse	OTU_265	184.6	Bacteria	Proteobacteria	Gammaproteobacteria	Xanthomonadales	Xanthomonadaceae	Lysobacter	Lysobacter_enzymogenes
cse	OTU_762	29.6	Bacteria	Proteobacteria	Gammaproteobacteria	Xanthomonadales	Xanthomonadaceae	Lysobacter	Lysobacter_dokdonensis
cse	OTU_3568	6.9	Bacteria	Proteobacteria	Deltaproteobacteria	Bdellovibrionales	Bdellovibrionaceae	Bdellovibrio	Bdellovibrio_bacteriovorus
cse	OTU_5179	39.8	Bacteria	Proteobacteria	Deltaproteobacteria	Myxococcales	Haliangiaceae	Haliangium	Haliangium_tepidum
cse	OTU_920	47.7	Bacteria	Proteobacteria	Alphaproteobacteria	Sphingomonadales	Sphingomonadaceae	Sphingomonas	Sphingomonas_sediminicola
cse	OTU_1565	17.5	Bacteria	Proteobacteria	Alphaproteobacteria	Sphingomonadales	Erythrobacteraceae	Porphyrobacter	Porphyrobacter_tepidarius
cse	OTU_1964	12.5	Bacteria	Proteobacteria	Alphaproteobacteria	Sphingomonadales	Sphingomonadaceae	Sphingomonas	Sphingomonas_fennica
cse	OTU_1318	10.9	Bacteria	Proteobacteria	Deltaproteobacteria	Myxococcales	Haliangiaceae	Haliangium	Haliangium_tepidum
cse	OTU_650	46.3	Bacteria	Proteobacteria	Deltaproteobacteria	Myxococcales	Labilitrichaceae	Labilithrix	Labilithrix_luteola
cse	OTU_1014	25.7	Bacteria	Proteobacteria	Gammaproteobacteria	Xanthomonadales	Xanthomonadaceae	Lysobacter	Lysobacter_ginsengisoli
cse	OTU_821	38.2	Bacteria	Proteobacteria	Deltaproteobacteria	Myxococcales	Polyangiaceae	Minicystis	Minicystis_rosea
cse	OTU_1593	9.5	Bacteria	Proteobacteria	Deltaproteobacteria	Myxococcales	Geobacteraceae	Geobacter	Sandaracinus_amylolyticus
cse	OTU_1389	36.1	Bacteria	Proteobacteria	Betaproteobacteria	Rhodocyclales	Rhodocyclaceae	Uliginosibacterium	Uliginosibacterium_gangwonense
cse	OTU_1051	24.1	Bacteria	Proteobacteria	Alphaproteobacteria	Sphingomonadales	Sphingomonadaceae	Sphingomonas	Sphingomonas_jaspsi
cse	OTU_2849	11.2	Bacteria	Proteobacteria	Betaproteobacteria	Burkholderiales	Alcaligenaceae	Azohydromonas	Azohydromonas_australica
cse	OTU_4073	52	Bacteria	Proteobacteria	Gammaproteobacteria	Oceanospirillales	Oceanospirillaceae	Pseudomonas	Nitrincola_lacisaponensis
cse	OTU_1903	11.3	Bacteria	Proteobacteria	Alphaproteobacteria	Sphingomonadales	Erythrobacteraceae	Altererythrobacter	Porphyrobacter_sanguineus
cse	OTU_462	328	Bacteria	Proteobacteria	Betaproteobacteria	Burkholderiales	Comamonadaceae	Hydrogenophaga	Hydrogenophaga_bisanensis
cse	OTU_956	23.8	Bacteria	Proteobacteria	Alphaproteobacteria	Rhizobiales	Hyphomicrobiaceae	Pelagibacterium	Pelagibacterium_halotolerans
cse	OTU_1491	11.7	Bacteria	Proteobacteria	Deltaproteobacteria	Myxococcales	Polyangiaceae	Chondromyces	Labilithrix_luteola
cse	OTU_501	84.5	Bacteria	Proteobacteria	Deltaproteobacteria	Myxococcales	Nannocystaceae	Chondromyces	Chondromyces_crocatus
cse	OTU_908	24.9	Bacteria	Proteobacteria	Deltaproteobacteria	Myxococcales	Polyangiaceae	Chondromyces	Sorangium_cellulosum
cse	OTU_6045	9.1	Bacteria	Proteobacteria	Deltaproteobacteria	Bdellovibrionales	Bdellovibrionaceae	Bdellovibrio	Bdellovibrio_bacteriovorus
cse	OTU_3219	6.1	Bacteria	Proteobacteria	Alphaproteobacteria	Sphingomonadales	Erythrobacteraceae	Porphyrobacter	Porphyrobacter_tepidarius
cse	OTU_2484	17.3	Bacteria	Proteobacteria	Gammaproteobacteria	Oceanospirillales	Hahellaceae	Hahella	Hahella_chejuensis
cse	OTU_909	53.7	Bacteria	Proteobacteria	Gammaproteobacteria	Xanthomonadales	Xanthomonadaceae	Lysobacter	Lysobacter_xinjiangensis
cse	OTU_449	122.1	Bacteria	Proteobacteria	Alphaproteobacteria	Rhizobiales	Hyphomicrobiaceae	Devosia	Devosia_subaequoris
cse	OTU_1405	20.7	Bacteria	Proteobacteria	Deltaproteobacteria	Bdellovibrionales	Bacteriovoracaceae	Bacteriovorax	Bacteriovorax_stolpii
cse	OTU_635	55.1	Bacteria	Proteobacteria	Deltaproteobacteria	Myxococcales	Haliangiaceae	Haliangium	Haliangium_tepidum
cse	OTU_754	29.4	Bacteria	Proteobacteria	Deltaproteobacteria	Myxococcales	Cystobacteraceae	Geobacter	Anaeromyxobacter_dehalogenans
cse	OTU_1623	11	Bacteria	Proteobacteria	Alphaproteobacteria	Caulobacterales	Caulobacteraceae	Phenylobacterium	Caulobacter_ginsengisoli
cse	OTU_2141	14.6	Bacteria	Proteobacteria	Betaproteobacteria	Burkholderiales	Oxalobacteraceae	Herbaspirillum	Herbaspirillum_rubrisubalbicans
cse	OTU_1310	13.7	Bacteria	Proteobacteria	Deltaproteobacteria	Myxococcales	Nannocystaceae	Nannocystis	Nannocystis_exedens
cse	OTU_867	27	Bacteria	Proteobacteria	Gammaproteobacteria	Xanthomonadales	Xanthomonadaceae	Lysobacter	Lysobacter_dokdonensis
cse	OTU_266	17.8	Bacteria	Proteobacteria	Alphaproteobacteria	Rhizobiales	Hyphomicrobiaceae	Devosia	Devosia_submarina
cse	OTU_1687	17.5	Bacteria	Proteobacteria	Deltaproteobacteria	Myxococcales	Phaselicystidaceae	Phaselicystis	Phaselicystis_flava
cse	OTU_1605	19.1	Bacteria	Proteobacteria	Gammaproteobacteria	Xanthomonadales	Xanthomonadaceae	Lysobacter	Lysobacter_koreensis
cse	OTU_2441	14.5	Bacteria	Proteobacteria	Deltaproteobacteria	Bdellovibrionales	Bdellovibrionaceae	Bdellovibrio	Bdellovibrio_bacteriovorus
cse	OTU_2425	8.7	Bacteria	Proteobacteria	Deltaproteobacteria	Myxococcales	Haliangiaceae	Haliangium	Haliangium_tepidum
cse	OTU_2296	9.5	Bacteria	Proteobacteria	Alphaproteobacteria	Sphingomonadales	Erythrobacteraceae	Porphyrobacter	Porphyrobacter_tepidarius
cse	OTU_1306	17.4	Bacteria	Proteobacteria	Gammaproteobacteria	Xanthomonadales	Xanthomonadaceae	Lysobacter	Lysobacter_yangpyeongensis
cse	OTU_1366	23.4	Bacteria	Proteobacteria	Alphaproteobacteria	Rhizobiales	Phyllobacteriaceae	Mesorhizobium	Mesorhizobium_gobiense
cse	OTU_1824	11.5	Bacteria	Proteobacteria	Deltaproteobacteria	Myxococcales	Haliangiaceae	Haliangium	Haliangium_tepidum
cse	OTU_777	68	Bacteria	Proteobacteria	Deltaproteobacteria	Rhizobiales	Desulfuromonadaceae	Streptophyta	Pelobacter_acidigallici
cse	OTU_853	49.6	Bacteria	Proteobacteria	Alphaproteobacteria	Sphingomonadales	Sphingomonadaceae	Sphingopyxis	Sphingopyxis_bauzanensis
cse	OTU_2642	5.3	Bacteria	Proteobacteria	Alphaproteobacteria	Rhizobiales	Hyphomicrobiaceae	Devosia	Devosia_submarina
cse	OTU_628	148.4	Bacteria	Proteobacteria	Betaproteobacteria	Burkholderiales	Comamonadaceae	Hydrogenophaga	Hydrogenophaga_atypica
cse	OTU_3484	8.6	Bacteria	Proteobacteria	Betaproteobacteria	Burkholderiales	Comamonadaceae	Ramlibacter	Acidovorax_avenae
cse	OTU_4793	8.5	Bacteria	Proteobacteria	Betaproteobacteria	Burkholderiales	Pseudomonadaceae	Rhizobacter	Aquabacterium_limnoticum
cse	OTU_1867	15.7	Bacteria	Proteobacteria	Alphaproteobacteria	Rhizobiales	Rhizobiaceae	Rhizobium	Rhizobium_daejeonense
cse	OTU_6388	11.5	Bacteria	Proteobacteria	Deltaproteobacteria	Bdellovibrionales	Bdellovibrionaceae	Bdellovibrio	Bdellovibrio_bacteriovorus
cse	OTU_2786	6.7	Bacteria	Proteobacteria	Alphaproteobacteria	Sphingomonadales	Erythrobacteraceae	Altererythrobacter	Altererythrobacter_marensis
cse	OTU_929	84.1	Bacteria	Proteobacteria	Deltaproteobacteria	Bdellovibrionales	Bacteriovoracaceae	Halobacteriovorax	Halobacteriovorax_litoralis
cse	OTU_1789	18	Bacteria	Proteobacteria	Alphaproteobacteria	Rhodobacterales	Rhodobacteraceae	Tabrizicola	Tabrizicola_aquatica
cse	OTU_2079	11	Bacteria	Proteobacteria	Deltaproteobacteria	Myxococcales	Haliangiaceae	Haliangium	Haliangium_tepidum
cse	OTU_1960	6.3	Bacteria	Proteobacteria	Deltaproteobacteria	Myxococcales	Nannocystaceae	Nannocystis	Nannocystis_exedens
cse	OTU_2428	8.9	Bacteria	Proteobacteria	Betaproteobacteria	Burkholderiales	Burkholderiales_incertae_sedis	Ideonella	Ideonella_dechloratans
cse	OTU_1900	28.2	Bacteria	Proteobacteria	Betaproteobacteria	Burkholderiales	Comamonadaceae	Acidovorax	Pseudacidovorax_intermedius
cse	OTU_2238	7	Bacteria	Proteobacteria	Alphaproteobacteria	Rhizobiales	Rhizobiales_incertae_sedis	Alsobacter	Alsobacter_metallidurans
cse	OTU_1853	18.1	Bacteria	Proteobacteria	Alphaproteobacteria	Caulobacterales	Caulobacteraceae	Brevundimonas	Brevundimonas_basaltis
cse	OTU_2404	8.5	Bacteria	Proteobacteria	Alphaproteobacteria	Sphingomonadales	Erythrobacteraceae	Altererythrobacter	Altererythrobacter_dongtanensis
cse	OTU_1143	19.7	Bacteria	Proteobacteria	Alphaproteobacteria	Sphingomonadales	Sphingomonadaceae	Sphingomonas	Sphingomonas_pseudosanguinis
cse	OTU_1197	42.8	Bacteria	Proteobacteria	Betaproteobacteria	Burkholderiales	Burkholderiales_incertae_sedis	Ideonella	Ideonella_dechloratans
cse	OTU_974	54.5	Bacteria	Proteobacteria	Gammaproteobacteria	Oceanospirillales	Oceanospirillaceae	Hahella	Hahella_antarctica
cse	OTU_2326	12.2	Bacteria	Proteobacteria	Alphaproteobacteria	Sphingomonadales	Sphingomonadaceae	Sphingorhabdus	Sphingorhabdus_wooponensis
cse	OTU_1349	23.5	Bacteria	Proteobacteria	Deltaproteobacteria	Myxococcales	Polyangiaceae	Minicystis	Minicystis_rosea
cse	OTU_1619	37.3	Bacteria	Proteobacteria	Betaproteobacteria	Burkholderiales	Alcaligenaceae	Azohydromonas	Azohydromonas_australica
cse	OTU_5503	9.5	Bacteria	Proteobacteria	Betaproteobacteria	Burkholderiales	Comamonadaceae	Zhizhongheella	Zhizhongheella_caldifontis
cse	OTU_2566	12.6	Bacteria	Proteobacteria	Gammaproteobacteria	Xanthomonadales	Xanthomonadaceae	Lysobacter	Lysobacter_oligotrophicus
cse	OTU_3275	19.4	Bacteria	Proteobacteria	Oligoflexia	Oligoflexales	Oligoflexaceae	Oligoflexus	Oligoflexus_tunisiensis
cse	OTU_3327	35.9	Bacteria	Proteobacteria	Oligoflexia	Oligoflexales	Oligoflexaceae	Oligoflexus	Oligoflexus_tunisiensis
cse	OTU_2991	12.4	Bacteria	Proteobacteria	Oligoflexia	Oligoflexales	Oligoflexaceae	Oligoflexus	Oligoflexus_tunisiensis
cse	OTU_633	112.6	Bacteria	Proteobacteria	Betaproteobacteria	Burkholderiales	Oxalobacteraceae	Herminiimonas	Herminiimonas_aquatilis
cse	OTU_3349	6.9	Bacteria	Proteobacteria	Alphaproteobacteria	Sphingomonadales	Erythrobacteraceae	Erythrobacter	Erythrobacter_citreus
cse	OTU_1719	53.7	Bacteria	Proteobacteria	Oligoflexia	Oligoflexales	Oligoflexaceae	Oligoflexus	Oligoflexus_tunisiensis
cse	OTU_2342	22.5	Bacteria	Proteobacteria	Oligoflexia	Oligoflexales	Oligoflexaceae	Oligoflexus	Oligoflexus_tunisiensis
cse	OTU_2252	12.4	Bacteria	Proteobacteria	Alphaproteobacteria	Sphingomonadales	Sphingomonadaceae	Sphingomonas	Clostridium_alkalicellulosi
cse	OTU_5172	10.7	Bacteria	Proteobacteria	Oligoflexia	Oligoflexales	Oligoflexaceae	Oligoflexus	Oligoflexus_tunisiensis
cse	OTU_2957	9.6	Bacteria	Verrucomicrobia	Opitutae	Opitutales	Opitutaceae	Opitutus	Opitutus_terrae
cse	OTU_3908	7.8	Bacteria	Verrucomicrobia	Subdivision3	Unassigned	Unassigned	Subdivision3_genera_incertae_sedis	Unassigned
cse	OTU_3029	7.1	Bacteria	Verrucomicrobia	Opitutae	Opitutales	Opitutaceae	Opitutus	Opitutus_terrae
ccr	OTU_382	226.333	Bacteria	Actinobacteria	Actinobacteria	Actinomycetales	Streptomycetaceae	Streptomyces	Streptomyces_turgidiscabies
ccr	OTU_49	2864.75	Bacteria	Actinobacteria	Actinobacteria	Actinomycetales	Streptomycetaceae	Streptomyces	Streptomyces_beijiangensis
ccr	OTU_904	53.1667	Bacteria	Proteobacteria	Gammaproteobacteria	Xanthomonadales	Xanthomonadaceae	Lysobacter	Lysobacter_dokdonensis
ccr	OTU_528	152.083	Bacteria	Proteobacteria	Gammaproteobacteria	Pseudomonadales	Pseudomonadaceae	Cellvibrio	Cellvibrio_vulgaris
ccr	OTU_1597	120.083	Bacteria	Actinobacteria	Actinobacteria	Actinomycetales	Streptomycetaceae	Streptomyces	Streptomyces_turgidiscabies
ccr	OTU_1847	12.4167	Bacteria	Actinobacteria	Actinobacteria	Actinomycetales	Nocardioidaceae	Nocardioides	Nocardioides_psychrotolerans
ccr	OTU_1016	50.6667	Bacteria	Actinobacteria	Actinobacteria	Actinomycetales	Streptomycetaceae	Streptomyces	Streptomyces_thermocarboxydovorans
ccr	OTU_1324	24.75	Bacteria	Proteobacteria	Gammaproteobacteria	Xanthomonadales	Xanthomonadaceae	Lysobacter	Lysobacter_dokdonensis
ccr	OTU_346	242.583	Bacteria	Proteobacteria	Gammaproteobacteria	Pseudomonadales	Pseudomonadaceae	Pseudomonas	Pseudomonas_flavescens
ccr	OTU_1618	18.8333	Bacteria	Actinobacteria	Actinobacteria	Actinomycetales	Nocardioidaceae	Nocardioides	Nocardioides_alkalitolerans
ccr	OTU_4230	8.58333	Bacteria	Firmicutes	Clostridia	Clostridiales	Lachnospiraceae	Clostridium_XlVa	Clostridium_xylanovorans
ccr	OTU_843	62.25	Bacteria	Proteobacteria	Alphaproteobacteria	Rhizobiales	Phyllobacteriaceae	Hoeflea	Hoeflea_marina
ccr	OTU_1691	47.9167	Bacteria	Proteobacteria	Deltaproteobacteria	Desulfuromonadales	Desulfuromonadaceae	Pelobacter	Pelobacter_acetylenicus
ccr	OTU_3301	13.6667	Bacteria	Proteobacteria	Deltaproteobacteria	Myxococcales	Cystobacteraceae	Cystobacter	Sandaracinus_amylolyticus
ccr	OTU_968	33.0833	Bacteria	Proteobacteria	Gammaproteobacteria	Xanthomonadales	Xanthomonadaceae	Lysobacter	Lysobacter_spongiicola
ccr	OTU_3548	7.25	Bacteria	Chloroflexi	Chloroflexia	Herpetosiphonales	Herpetosiphonaceae	Herpetosiphon	Roseiflexus_castenholzii
ccr	OTU_1979	19.6667	Bacteria	Proteobacteria	Alphaproteobacteria	Rhizobiales	Rhizobiaceae	Ensifer	Ensifer_americanus
ccr	OTU_6232	8.08333	Bacteria	Proteobacteria	Alphaproteobacteria	Rhizobiales	Methylobacteriaceae	Microvirga	Microvirga_guangxiensis
ccr	OTU_1467	61.5	Bacteria	Proteobacteria	Gammaproteobacteria	Pseudomonadales	Pseudomonadaceae	Cellvibrio	Cellvibrio_diazotrophicus
ccr	OTU_3792	7.91667	Bacteria	Planctomycetes	Planctomycetia	Planctomycetales	Planctomycetaceae	Blastopirellula	Blastopirellula_cremea
ccr	OTU_1890	34.25	Bacteria	Proteobacteria	Alphaproteobacteria	Rhizobiales	Rhizobiaceae	Ensifer	Ensifer_meliloti
ccr	OTU_3184	11	Bacteria	Proteobacteria	Gammaproteobacteria	Xanthomonadales	Xanthomonadaceae	Lysobacter	Lysobacter_dokdonensis
ccr	OTU_1521	21.3333	Bacteria	Actinobacteria	Actinobacteria	Actinomycetales	Micrococcaceae	Arthrobacter	Arthrobacter_pascens
ccr	OTU_1854	19.6667	Bacteria	Proteobacteria	Gammaproteobacteria	Xanthomonadales	Xanthomonadaceae	Steroidobacter	Steroidobacter_agariperforans
ccr	OTU_6051	8.16667	Bacteria	Proteobacteria	Alphaproteobacteria	Rhizobiales	Rhizobiaceae	Ensifer	Ensifer_mexicanus
ccr	OTU_4361	7	Bacteria	Proteobacteria	Alphaproteobacteria	Caulobacterales	Caulobacteraceae	Brevundimonas	Brevundimonas_basaltis
ccr	OTU_2152	51.75	Bacteria	Acidobacteria	Acidobacteria_Gp10	Unassigned	Unassigned	Gp10	Unassigned
ccr	OTU_3337	36.9167	Bacteria	Firmicutes	Bacilli	Bacillales	Staphylococcaceae	Staphylococcus	Staphylococcus_hominis_subsp._novobiosepticus
ccr	OTU_3031	7.16667	Bacteria	Proteobacteria	Gammaproteobacteria	Pseudomonadales	Pseudomonadaceae	Azotobacter	Azotobacter_chroococcum
ccr	OTU_3347	9.08333	Bacteria	Proteobacteria	Gammaproteobacteria	Xanthomonadales	Xanthomonadaceae	Luteimonas	Luteimonas_cucumeris
ccr	OTU_2126	14.4167	Bacteria	Proteobacteria	Betaproteobacteria	Burkholderiales	Oxalobacteraceae	Massilia	Massilia_niabensis
ccr	OTU_4866	16.3333	Bacteria	Proteobacteria	Gammaproteobacteria	Chromatiales	Ectothiorhodospiraceae	Thiogranum	Thiogranum_longum
ccr	OTU_5233	7.25	Bacteria	Proteobacteria	Alphaproteobacteria	Caulobacterales	Caulobacteraceae	Caulobacter	Caulobacter_segnis
ccr	OTU_1878	13.5833	Bacteria	Cyanobacteria	Cyanobacteria	Unassigned	Family_I	GpI	Unassigned
ccr	OTU_1950	79.9167	Bacteria	Actinobacteria	Actinobacteria	Actinomycetales	Pseudonocardiaceae	Actinophytocola	Actinophytocola_corallina
ccr	OTU_2531	7.08333	Bacteria	Actinobacteria	Actinobacteria	Actinomycetales	Streptomycetaceae	Kitasatospora	Kitasatospora_cystarginea
ccr	OTU_3958	13.75	Bacteria	Proteobacteria	Deltaproteobacteria	Bdellovibrionales	Bacteriovoracaceae	Peredibacter	Peredibacter_starrii
ccr	OTU_4791	7.41667	Bacteria	Proteobacteria	Betaproteobacteria	Burkholderiales	Comamonadaceae	Xenophilus	Xenophilus_aerolatus
ccr	OTU_5416	18.6667	Bacteria	Proteobacteria	Deltaproteobacteria	Desulfuromonadales	Syntrophaceae	Desulfobacca	Desulfobacca_acetoxidans
ccr	OTU_4289	24.5	Bacteria	Bacteroidetes	Flavobacteriia	Flavobacteriales	Flavobacteriaceae	Flavobacterium	Flavobacterium_aquatile
ccr	OTU_5058	15.25	Bacteria	Proteobacteria	Gammaproteobacteria	Legionellales	Coxiellaceae	Diplorickettsia	Diplorickettsia_massiliensis
ccr	OTU_5028	17.4167	Bacteria	Proteobacteria	Betaproteobacteria	Burkholderiales	Oxalobacteraceae	Massilia	Massilia_kyonggiensis
cad4cad5	OTU_7	24601.6	Bacteria	Proteobacteria	Betaproteobacteria	Burkholderiales	Oxalobacteraceae	Herbaspirillum	Herbaspirillum_rubrisubalbicans
cad4cad5	OTU_18	6193.55	Bacteria	Proteobacteria	Betaproteobacteria	Burkholderiales	Oxalobacteraceae	Noviherbaspirillum	Noviherbaspirillum_suwonense
cad4cad5	OTU_290	185	Bacteria	Proteobacteria	Betaproteobacteria	Methylophilales	Methylophilaceae	Methylovorus	Methylovorus_glucosotrophus
cad4cad5	OTU_529	134.364	Bacteria	Proteobacteria	Alphaproteobacteria	Rhizobiales	Hyphomicrobiaceae	Hyphomicrobium	Hyphomicrobium_sulfonivorans
cad4cad5	OTU_654	152.364	Bacteria	Proteobacteria	Betaproteobacteria	Burkholderiales	Burkholderiales_incertae_sedis	Aquabacterium	Aquabacterium_fontiphilum
cad4cad5	OTU_190	379	Bacteria	Proteobacteria	Betaproteobacteria	Methylophilales	Methylophilaceae	Methylovorus	Methylovorus_glucosotrophus
cad4cad5	OTU_450	126.455	Bacteria	Firmicutes	Bacilli	Bacillales	Paenibacillaceae_1	Paenibacillus	Paenibacillus_prosopidis
cad4cad5	OTU_108	793.727	Bacteria	Proteobacteria	Betaproteobacteria	Burkholderiales	Comamonadaceae	Schlegelella	Caldimonas_manganoxidans
cad4cad5	OTU_237	279.182	Bacteria	Proteobacteria	Alphaproteobacteria	Rhizobiales	Hyphomicrobiaceae	Hyphomicrobium	Hyphomicrobium_vulgare
cad4cad5	OTU_169	647.455	Bacteria	Proteobacteria	Alphaproteobacteria	Sphingomonadales	Erythrobacteraceae	Altererythrobacter	Altererythrobacter_namhicola
cad4cad5	OTU_4059	117.636	Bacteria	Proteobacteria	Betaproteobacteria	Burkholderiales	Oxalobacteraceae	Noviherbaspirillum	Noviherbaspirillum_malthae
cad4cad5	OTU_982	29.8182	Bacteria	Actinobacteria	Actinobacteria	Actinomycetales	Micrococcaceae	Arthrobacter	Arthrobacter_pascens
cad4cad5	OTU_51	2862.27	Bacteria	Proteobacteria	Betaproteobacteria	Burkholderiales	Oxalobacteraceae	Noviherbaspirillum	Herbaspirillum_rubrisubalbicans
cad4cad5	OTU_359	148.455	Bacteria	Proteobacteria	Alphaproteobacteria	Rhizobiales	Hyphomicrobiaceae	Devosia	Devosia_riboflavina
cad4cad5	OTU_113	725.818	Bacteria	Actinobacteria	Actinobacteria	Actinomycetales	Micromonosporaceae	Catellatospora	Catellatospora_bangladeshensis
cad4cad5	OTU_271	144.636	Bacteria	Proteobacteria	Betaproteobacteria	Burkholderiales	Comamonadaceae	Kinneretia	Kinneretia_asaccharophila
cad4cad5	OTU_2026	11.2727	Bacteria	Proteobacteria	Betaproteobacteria	Burkholderiales	Comamonadaceae	Ramlibacter	Schlegelella_aquatica
cad4cad5	OTU_360	88.5455	Bacteria	Proteobacteria	Betaproteobacteria	Burkholderiales	Comamonadaceae	Curvibacter	Curvibacter_fontanus
cad4cad5	OTU_4090	11.2727	Bacteria	Proteobacteria	Alphaproteobacteria	Sphingomonadales	Erythrobacteraceae	Altererythrobacter	Altererythrobacter_aestuarii
cad4cad5	OTU_429	102.364	Bacteria	Proteobacteria	Alphaproteobacteria	Rhizobiales	Hyphomicrobiaceae	Hyphomicrobium	Hyphomicrobium_vulgare
cad4cad5	OTU_144	532.091	Bacteria	Proteobacteria	Gammaproteobacteria	Pseudomonadales	Pseudomonadaceae	Pseudomonas	Pseudomonas_benzenivorans
cad4cad5	OTU_453	205.455	Bacteria	Proteobacteria	Betaproteobacteria	Burkholderiales	Burkholderiales_incertae_sedis	Piscinibacter	Piscinibacter_aquaticus
cad4cad5	OTU_153	554	Bacteria	Firmicutes	Bacilli	Bacillales	Paenibacillaceae_1	Paenibacillus	Paenibacillus_prosopidis
cad4cad5	OTU_1399	15.1818	Bacteria	Proteobacteria	Alphaproteobacteria	Bacillales	Rhodobacteraceae	Rhodovulum	Rhodovulum_lacipunicei
cad4cad5	OTU_841	47.3636	Bacteria	Firmicutes	Bacilli	Bacillales	Paenibacillaceae_1	Paenibacillus	Paenibacillus_pectinilyticus
cad4cad5	OTU_1082	49.5455	Bacteria	Proteobacteria	Alphaproteobacteria	Sphingomonadales	Erythrobacteraceae	Altererythrobacter	Altererythrobacter_namhicola
cad4cad5	OTU_1939	11.4545	Bacteria	Proteobacteria	Alphaproteobacteria	Sphingomonadales	Sphingomonadaceae	Sphingomonas	Sphingosinicella_vermicomposti
cad4cad5	OTU_1088	34.3636	Bacteria	Proteobacteria	Gammaproteobacteria	Xanthomonadales	Sinobacteraceae	Steroidobacter	Steroidobacter_agariperforans
cad4cad5	OTU_938	52.9091	Bacteria	Proteobacteria	Alphaproteobacteria	Sphingomonadales	Erythrobacteraceae	Altererythrobacter	Altererythrobacter_namhicola
cad4cad5	OTU_1535	171	Bacteria	Proteobacteria	Alphaproteobacteria	Rhizobiales	Methylobacteriaceae	Microvirga	Microvirga_aerophila
cad4cad5	OTU_2369	14.7273	Bacteria	Actinobacteria	Actinobacteria	Solirubrobacterales	Solirubrobacteraceae	Solirubrobacter	Solirubrobacter_taibaiensis
cad4cad5	OTU_338	210.545	Bacteria	Proteobacteria	Alphaproteobacteria	Sphingomonadales	Erythrobacteraceae	Altererythrobacter	Altererythrobacter_namhicola
cad4cad5	OTU_3504	8.81818	Bacteria	Proteobacteria	Betaproteobacteria	Burkholderiales	Oxalobacteraceae	Noviherbaspirillum	Noviherbaspirillum_malthae
cad4cad5	OTU_565	337.273	Bacteria	Proteobacteria	Betaproteobacteria	Burkholderiales	Oxalobacteraceae	Herbaspirillum	Herbaspirillum_rubrisubalbicans
cad4cad5	OTU_367	176.182	Bacteria	Proteobacteria	Gammaproteobacteria	Xanthomonadales	Sinobacteraceae	Steroidobacter	Steroidobacter_agariperforans
cad4cad5	OTU_137	592.455	Bacteria	Proteobacteria	Gammaproteobacteria	Pseudomonadales	Pseudomonadaceae	Pseudomonas	Pseudomonas_alcaliphila
cad4cad5	OTU_934	31.0909	Bacteria	Proteobacteria	Alphaproteobacteria	Rhizobiales	Hyphomicrobiaceae	Hyphomicrobium	Hyphomicrobium_nitrativorans
cad4cad5	OTU_819	54.4545	Bacteria	Actinobacteria	Actinobacteria	Actinomycetales	Micromonosporaceae	Catellatospora	Catellatospora_citrea_subsp._citrea
cad4cad5	OTU_2056	11.7273	Bacteria	Proteobacteria	Alphaproteobacteria	Rhodospirillales	Rhodospirillaceae	Ferrovibrio	Ferrovibrio_denitrificans
cad4cad5	OTU_3475	58.5455	Bacteria	Actinobacteria	Actinobacteria	Actinomycetales	Streptosporangiaceae	Herbidospora	Herbidospora_daliensis
cad4cad5	OTU_694	75	Bacteria	Firmicutes	Bacilli	Bacillales	Paenibacillaceae_1	Paenibacillus	Paenibacillus_pinihumi
cad4cad5	OTU_581	60.1818	Bacteria	Proteobacteria	Betaproteobacteria	Burkholderiales	Comamonadaceae	Curvibacter	Curvibacter_fontanus
cad4cad5	OTU_1322	17.4545	Bacteria	Proteobacteria	Betaproteobacteria	Burkholderiales	Comamonadaceae	Ramlibacter	Sphaerotilus_hippei
cad4cad5	OTU_4938	10.8182	Bacteria	Proteobacteria	Betaproteobacteria	Burkholderiales	Comamonadaceae	Ramlibacter	Sphaerotilus_hippei
cad4cad5	OTU_2363	9.72727	Bacteria	Proteobacteria	Alphaproteobacteria	Sphingomonadales	Erythrobacteraceae	Altererythrobacter	Altererythrobacter_atlanticus
cad4cad5	OTU_3924	56	Bacteria	Proteobacteria	Betaproteobacteria	Burkholderiales	Burkholderiaceae	Paucimonas	Paucimonas_lemoignei
cad4cad5	OTU_351	127.727	Bacteria	Proteobacteria	Alphaproteobacteria	Rhizobiales	Hyphomicrobiaceae	Hyphomicrobium	Hyphomicrobium_vulgare
cad4cad5	OTU_594	52.9091	Bacteria	Proteobacteria	Alphaproteobacteria	Rhizobiales	Hyphomicrobiaceae	Hyphomicrobium	Hyphomicrobium_vulgare
cad4cad5	OTU_125	763.909	Bacteria	Actinobacteria	Actinobacteria	Actinomycetales	Micromonosporaceae	Actinoplanes	Actinoplanes_friuliensis
cad4cad5	OTU_3973	12.6364	Bacteria	Proteobacteria	Alphaproteobacteria	Sphingomonadales	Sphingomonadaceae	Sphingobium	Sphingobium_xanthum
cad4cad5	OTU_41	3212.45	Bacteria	Proteobacteria	Gammaproteobacteria	Pseudomonadales	Pseudomonadaceae	Pseudomonas	Pseudomonas_straminea
cad4cad5	OTU_256	287.182	Bacteria	Actinobacteria	Actinobacteria	Actinomycetales	Streptomycetaceae	Streptomyces	Streptomyces_mutomycini
cad4cad5	OTU_1750	88.4545	Bacteria	Proteobacteria	Betaproteobacteria	Burkholderiales	Comamonadaceae	Ramlibacter	Schlegelella_aquatica
cad4cad5	OTU_682	90.5455	Bacteria	Proteobacteria	Alphaproteobacteria	Sphingomonadales	Erythrobacteraceae	Altererythrobacter	Altererythrobacter_xinjiangensis
cad4cad5	OTU_476	89	Bacteria	Firmicutes	Bacilli	Bacillales	Paenibacillaceae_1	Cohnella	Cohnella_lupini
cad4cad5	OTU_1811	8.63636	Bacteria	Proteobacteria	Gammaproteobacteria	Xanthomonadales	Xanthomonadaceae	Mizugakiibacter	Mizugakiibacter_sediminis
cad4cad5	OTU_828	40	Bacteria	Proteobacteria	Betaproteobacteria	Burkholderiales	Burkholderiales_incertae_sedis	Piscinibacter	Piscinibacter_aquaticus
cad4cad5	OTU_1524	29.2727	Bacteria	Proteobacteria	Alphaproteobacteria	Sphingomonadales	Erythrobacteraceae	Altererythrobacter	Altererythrobacter_aestuarii
cad4cad5	OTU_613	14.8182	Bacteria	Proteobacteria	Alphaproteobacteria	Rhizobiales	Hyphomicrobiaceae	Hyphomicrobium	Hyphomicrobium_sulfonivorans
cad4cad5	OTU_1600	10.2727	Bacteria	Actinobacteria	Actinobacteria	Acidimicrobiales	Acidimicrobiaceae	Ilumatobacter	Ilumatobacter_fluminis
cad4cad5	OTU_1302	14.2727	Bacteria	Proteobacteria	Alphaproteobacteria	Rhizobiales	Rhizobiaceae	Kaistia	Variibacter_gotjawalensis
cad4cad5	OTU_1476	17.9091	Bacteria	Proteobacteria	Alphaproteobacteria	Sphingomonadales	Erythrobacteraceae	Altererythrobacter	Altererythrobacter_aestuarii
cad4cad5	OTU_757	60.9091	Bacteria	Firmicutes	Bacilli	Bacillales	Paenibacillaceae_1	Paenibacillus	Paenibacillus_pinihumi
cad4cad5	OTU_978	37.6364	Bacteria	Proteobacteria	Betaproteobacteria	Burkholderiales	Comamonadaceae	Ramlibacter	Limnohabitans_australis
cad4cad5	OTU_761	50.2727	Bacteria	Firmicutes	Bacilli	Bacillales	Paenibacillaceae_1	Cohnella	Cohnella_lupini
cad4cad5	OTU_609	60.8182	Bacteria	Proteobacteria	Betaproteobacteria	Methylophilales	Methylophilaceae	Methylovorus	Methylovorus_glucosotrophus
cad4cad5	OTU_1674	20.6364	Bacteria	Proteobacteria	Alphaproteobacteria	Sphingomonadales	Erythrobacteraceae	Altererythrobacter	Altererythrobacter_aestuarii
cad4cad5	OTU_1312	21.4545	Bacteria	Firmicutes	Bacilli	Bacillales	Paenibacillaceae_1	Cohnella	Cohnella_lupini
cad4cad5	OTU_1675	27.6364	Bacteria	Proteobacteria	Alphaproteobacteria	Sphingomonadales	Erythrobacteraceae	Porphyrobacter	Altererythrobacter_aestuarii
cad4cad5	OTU_766	34.8182	Bacteria	Proteobacteria	Gammaproteobacteria	Xanthomonadales	Sinobacteraceae	Alkanibacter	Alkanibacter_difficilis
cad4cad5	OTU_1078	25.1818	Bacteria	Proteobacteria	Gammaproteobacteria	Chromatiales	Chromatiaceae	Coxiella	Coxiella_burnetii
cad4cad5	OTU_707	52.5455	Bacteria	Proteobacteria	Gammaproteobacteria	Xanthomonadales	Sinobacteraceae	Steroidobacter	Steroidobacter_agariperforans
cad4cad5	OTU_992	33.4545	Bacteria	Proteobacteria	Betaproteobacteria	Methylophilales	Methylophilaceae	Methylophilus	Methylophilus_rhizosphaerae
cad4cad5	OTU_435	239.364	Bacteria	Proteobacteria	Betaproteobacteria	Burkholderiales	Oxalobacteraceae	Undibacterium	Undibacterium_pigrum
cad4cad5	OTU_1990	11.6364	Bacteria	Proteobacteria	Alphaproteobacteria	Sphingomonadales	Erythrobacteraceae	Altererythrobacter	Altererythrobacter_atlanticus
cad4cad5	OTU_1779	17.3636	Bacteria	Proteobacteria	Gammaproteobacteria	Xanthomonadales	Sinobacteraceae	Steroidobacter	Steroidobacter_agariperforans
cad4cad5	OTU_3208	11.8182	Bacteria	Proteobacteria	Deltaproteobacteria	Myxococcales	Nannocystaceae	Nannocystis	Nannocystis_exedens
cad4cad5	OTU_872	27.1818	Bacteria	Proteobacteria	Betaproteobacteria	Burkholderiales	Comamonadaceae	Ramlibacter	Sphaerotilus_hippei
cad4cad5	OTU_1989	20.3636	Bacteria	Proteobacteria	Gammaproteobacteria	Xanthomonadales	Sinobacteraceae	Steroidobacter	Steroidobacter_agariperforans
cad4cad5	OTU_4222	7.54545	Bacteria	Proteobacteria	Betaproteobacteria	Burkholderiales	Rhodocyclaceae	Zoogloea	Zoogloea_ramigera
cad4cad5	OTU_1211	24.4545	Bacteria	Firmicutes	Bacilli	Bacillales	Paenibacillaceae_1	Paenibacillus	Paenibacillus_pectinilyticus
cad4cad5	OTU_6357	29.7273	Bacteria	Proteobacteria	Gammaproteobacteria	Legionellales	Coxiellaceae	Diplorickettsia	Diplorickettsia_massiliensis
cad4cad5	OTU_1685	14.8182	Bacteria	Firmicutes	Bacilli	Bacillales	Paenibacillaceae_1	Cohnella	Cohnella_luojiensis
cad4cad5	OTU_2272	6.81818	Bacteria	Firmicutes	Bacilli	Bacillales	Paenibacillaceae_1	Paenibacillus	Paenibacillus_pectinilyticus
cad4cad5	OTU_2990	39.3636	Bacteria	Proteobacteria	Betaproteobacteria	Burkholderiales	Oxalobacteraceae	Noviherbaspirillum	Noviherbaspirillum_suwonense
cad4cad5	OTU_2962	10.1818	Bacteria	Bacteroidetes	Sphingobacteriia	Sphingobacteriales	Sphingobacteriaceae	Sphingobacterium	Vibrionimonas_magnilacihabitans
cad4cad5	OTU_1301	17.8182	Bacteria	Proteobacteria	Betaproteobacteria	Burkholderiales	Burkholderiales_incertae_sedis	Aquabacterium	Aquabacterium_fontiphilum
cad4cad5	OTU_3985	7.27273	Bacteria	Proteobacteria	Alphaproteobacteria	Rhodobacterales	Rhodobacteraceae	Oceanicella	Pleomorphobacterium_xiamenense
cad4cad5	OTU_1007	18.8182	Bacteria	Proteobacteria	Betaproteobacteria	Burkholderiales	Rhodocyclaceae	Uliginosibacterium	Uliginosibacterium_gangwonense
cad4cad5	OTU_2294	9.63636	Bacteria	Proteobacteria	Alphaproteobacteria	Rhizobiales	Rhizobiaceae	Rhizobium	Rhizobium_alvei
cad4cad5	OTU_3675	6.27273	Bacteria	Firmicutes	Bacilli	Bacillales	Paenibacillaceae_1	Paenibacillus	Paenibacillus_antarcticus
cad4cad5	OTU_2912	11.1818	Bacteria	Firmicutes	Bacilli	Bacillales	Paenibacillaceae_1	Paenibacillus	Paenibacillus_pocheonensis
cad4cad5	OTU_2055	14	Bacteria	Firmicutes	Bacilli	Bacillales	Thermoactinomycetaceae_2	Planifilum	Planifilum_composti
cad4cad5	OTU_2364	10.1818	Bacteria	Firmicutes	Bacilli	Bacillales	Bacillaceae_2	Terribacillus	Terribacillus_goriensis
cad4cad5	OTU_1651	14.7273	Bacteria	Proteobacteria	Alphaproteobacteria	Rhizobiales	Xanthobacteraceae	Ancylobacter	Ancylobacter_oerskovii
cad4cad5	OTU_1317	15.6364	Bacteria	Proteobacteria	Betaproteobacteria	Methylophilales	Methylophilaceae	Methylobacillus	Methylobacillus_gramineus
cad4cad5	OTU_407	69.6364	Bacteria	Proteobacteria	Alphaproteobacteria	Sphingomonadales	Sphingomonadaceae	Sphingomonas	Sphingomonas_sediminicola
cad4cad5	OTU_1486	14.7273	Bacteria	Firmicutes	Bacilli	Bacillales	Paenibacillaceae_1	Cohnella	Cohnella_luojiensis
cad4cad5	OTU_259	260.909	Bacteria	Chloroflexi	Chloroflexia	Herpetosiphonales	Herpetosiphonaceae	Herpetosiphon	Herpetosiphon_geysericola
cad4cad5	OTU_3938	7.27273	Bacteria	Proteobacteria	Betaproteobacteria	Methylophilales	Methylophilaceae	Methylotenera	Methylotenera_versatilis
cad4cad5	OTU_2105	18.6364	Bacteria	Proteobacteria	Gammaproteobacteria	Chromatiales	Ectothiorhodospiraceae	Coxiella	Coxiella_burnetii
cad4cad5	OTU_524	142.364	Bacteria	Proteobacteria	Deltaproteobacteria	Myxococcales	Polyangiaceae	Sorangium	Sorangium_cellulosum
cad4cad5	OTU_1767	24.5455	Bacteria	Proteobacteria	Betaproteobacteria	Burkholderiales	Comamonadaceae	Ramlibacter	Schlegelella_aquatica
cad4cad5	OTU_2074	9.72727	Bacteria	Proteobacteria	Gammaproteobacteria	Xanthomonadales	Sinobacteraceae	Steroidobacter	Steroidobacter_agariperforans
cad4cad5	OTU_1224	16.9091	Bacteria	Proteobacteria	Alphaproteobacteria	Rhodospirillales	Rhodospirillaceae	Nitrospirillum	Nitrospirillum_amazonense
cad4cad5	OTU_2050	14.1818	Bacteria	Proteobacteria	Betaproteobacteria	Methylophilales	Methylophilaceae	Methylovorus	Methylovorus_glucosotrophus
cad4cad5	OTU_1425	22.1818	Bacteria	Firmicutes	Bacilli	Bacillales	Paenibacillaceae_1	Paenibacillus	Paenibacillus_pectinilyticus
cad4cad5	OTU_2336	42.9091	Bacteria	Actinobacteria	Actinobacteria	Actinomycetales	Pseudonocardiaceae	Pseudonocardia	Pseudonocardia_xinjiangensis
cad4cad5	OTU_1479	15.4545	Bacteria	Firmicutes	Bacilli	Bacillales	Paenibacillaceae_1	Paenibacillus	Paenibacillus_pectinilyticus
cad4cad5	OTU_2268	10.8182	Bacteria	Proteobacteria	Deltaproteobacteria	Bdellovibrionales	Bacteriovoracaceae	Halobacteriovorax	Halobacteriovorax_litoralis
cad4cad5	OTU_1517	16.9091	Bacteria	Proteobacteria	Deltaproteobacteria	Myxococcales	Labilitrichaceae	Labilithrix	Labilithrix_luteola
cad4cad5	OTU_977	38.9091	Bacteria	Proteobacteria	Betaproteobacteria	Burkholderiales	Oxalobacteraceae	Massilia	Massilia_varians
cad4cad5	OTU_1643	13.2727	Bacteria	Proteobacteria	Alphaproteobacteria	Rhizobiales	Xanthobacteraceae	Ancylobacter	Ancylobacter_oerskovii
cad4cad5	OTU_1236	16.2727	Bacteria	Proteobacteria	Betaproteobacteria	Burkholderiales	Burkholderiales_incertae_sedis	Rubrivivax	Rubrivivax_gelatinosus
cad4cad5	OTU_2773	6	Bacteria	Proteobacteria	Betaproteobacteria	Methylophilales	Methylophilaceae	Methylovorus	Methylovorus_glucosotrophus
cad4cad5	OTU_1268	28.4545	Bacteria	Proteobacteria	Deltaproteobacteria	Myxococcales	Geobacteraceae	Geobacter	Geobacter_anodireducens
cad4cad5	OTU_1837	9.36364	Bacteria	Proteobacteria	Alphaproteobacteria	Rhizobiales	Methylobacteriaceae	Microvirga	Microvirga_aerophila
cad4cad5	OTU_1277	19.1818	Bacteria	Proteobacteria	Deltaproteobacteria	Myxococcales	Nannocystaceae	Nannocystis	Nannocystis_exedens
cad4cad5	OTU_2615	15.8182	Bacteria	Proteobacteria	Alphaproteobacteria	Rhizobiales	Methylobacteriaceae	Microvirga	Microvirga_subterranea
cad4cad5	OTU_2541	8.63636	Bacteria	Proteobacteria	Deltaproteobacteria	Bdellovibrionales	Bdellovibrionaceae	Bdellovibrio	Bdellovibrio_bacteriovorus
cad4cad5	OTU_4000	23.6364	Bacteria	Acidobacteria	Acidobacteria_Gp10	Chromatiales	Ectothiorhodospiraceae	Gp10	Halorhodospira_halophila
cad4cad5	OTU_2101	75.9091	Bacteria	Actinobacteria	Actinobacteria	Actinomycetales	Micromonosporaceae	Verrucosispora	Actinoplanes_globisporus
cad4cad5	OTU_2065	13.0909	Bacteria	Proteobacteria	Deltaproteobacteria	Myxococcales	Cystobacteraceae	Stigmatella	Stigmatella_erecta
cad4cad5	OTU_5194	6.27273	Bacteria	Proteobacteria	Alphaproteobacteria	Rhizobiales	Methylobacteriaceae	Microvirga	Microvirga_subterranea
cad4cad5	OTU_1587	19.1818	Bacteria	Proteobacteria	Deltaproteobacteria	Myxococcales	Phaselicystidaceae	Phaselicystis	Phaselicystis_flava
cad4cad5	OTU_5911	7.45455	Bacteria	Firmicutes	Bacilli	Bacillales	Paenibacillaceae_1	Ammoniibacillus	Ammoniibacillus_agariperforans
cad4cad5	OTU_2678	11.8182	Bacteria	Proteobacteria	Deltaproteobacteria	Bdellovibrionales	Bdellovibrionaceae	Bdellovibrio	Bdellovibrio_bacteriovorus
cad4cad5	OTU_4645	8	Bacteria	Firmicutes	Bacilli	Bacillales	Planococcaceae	Lysinibacillus	Lysinibacillus_odysseyi
cad4cad5	OTU_2694	8.72727	Bacteria	Proteobacteria	Alphaproteobacteria	Sphingomonadales	Erythrobacteraceae	Altererythrobacter	Altererythrobacter_aestuarii
cad4cad5	OTU_3830	11	Bacteria	Acidobacteria	Acidobacteria_Gp7	Unassigned	Unassigned	Gp7	Unassigned
cad4cad5	OTU_3324	7.09091	Bacteria	Proteobacteria	Alphaproteobacteria	Rhizobiales	Rhizobiaceae	Rhizobium	Bartonella_pachyuromydis
cad4cad5	OTU_3940	11.6364	Bacteria	Acidobacteria	Acidobacteria_Gp10	Chromatiales	Ectothiorhodospiraceae	Gp10	Halorhodospira_halophila
cad4cad5	OTU_3419	7.45455	Bacteria	Actinobacteria	Actinobacteria	Solirubrobacterales	Solirubrobacteraceae	Solirubrobacter	Solirubrobacter_taibaiensis
cad4cad5	OTU_4492	13.4545	Bacteria	Firmicutes	Bacilli	Bacillales	Paenibacillaceae_1	Paenibacillus	Paenibacillus_alginolyticus
cad4cad5	OTU_2228	33	Bacteria	Firmicutes	Bacilli	Bacillales	Bacillaceae_2	Tepidibacillus	Tepidibacillus_fermentans
cad4cad5	OTU_4054	10.1818	Bacteria	Firmicutes	Bacilli	Bacillales	Bacillaceae_2	Compostibacillus	Compostibacillus_humi
cad4cad5	OTU_979	71.4545	Bacteria	Proteobacteria	Gammaproteobacteria	Xanthomonadales	Xanthomonadaceae	Stenotrophomonas	Stenotrophomonas_chelatiphaga
cad4cad5	OTU_1967	12.1818	Bacteria	Proteobacteria	Gammaproteobacteria	Xanthomonadales	Xanthomonadaceae	Lysobacter	Lysobacter_daejeonensis
cad4cad5	OTU_5414	10.5455	Bacteria	Deinococcus-Thermus	Deinococci	Deinococcales	Trueperaceae	Truepera	Truepera_radiovictrix
cad4cad5	OTU_5160	8.72727	Bacteria	Proteobacteria	Deltaproteobacteria	Myxococcales	Phaselicystidaceae	Phaselicystis	Phaselicystis_flava
cad4cad5	OTU_3442	12.4545	Bacteria	Proteobacteria	Betaproteobacteria	Burkholderiales	Oxalobacteraceae	Massilia	Massilia_kyonggiensis
cad4cad5	OTU_2169	49.8182	Bacteria	Proteobacteria	Betaproteobacteria	Burkholderiales	Oxalobacteraceae	Massilia	Massilia_kyonggiensis
cad4cad5	OTU_2889	5.90909	Bacteria	Proteobacteria	Gammaproteobacteria	Xanthomonadales	Sinobacteraceae	Steroidobacter	Steroidobacter_denitrificans
cad4cad5	OTU_5636	8	Bacteria	Proteobacteria	Deltaproteobacteria	Myxococcales	Polyangiaceae	Sorangium	Sorangium_cellulosum
cad4cad5	OTU_2131	17.3636	Bacteria	Actinobacteria	Actinobacteria	Actinomycetales	Thermomonosporaceae	Actinomadura	Actinomadura_sediminis
cad4cad5	OTU_2224	30.0909	Bacteria	Chloroflexi	Chloroflexia	Chloroflexales	Herpetosiphonaceae	Herpetosiphon	Roseiflexus_castenholzii
cad4cad5	OTU_907	52.0909	Bacteria	Actinobacteria	Actinobacteria	Actinomycetales	Micromonosporaceae	Actinoplanes	Actinoplanes_capillaceus
cad4cad5	OTU_2075	17.4545	Bacteria	Proteobacteria	Betaproteobacteria	Burkholderiales	Oxalobacteraceae	Massilia	Duganella_phyllosphaerae
cad4cad5	OTU_3845	19.3636	Bacteria	Actinobacteria	Actinobacteria	Actinomycetales	Streptosporangiaceae	Nonomuraea	Nonomuraea_kuesteri
cad4cad5	OTU_1450	71.5455	Bacteria	Proteobacteria	Deltaproteobacteria	Myxococcales	Phaselicystidaceae	Phaselicystis	Phaselicystis_flava
cad4cad5	OTU_5413	8.63636	Bacteria	Chloroflexi	Chloroflexia	Herpetosiphonales	Herpetosiphonaceae	Herpetosiphon	Patulibacter_minatonensis
cad4cad5	OTU_2091	21	Bacteria	Candidatus_Saccharibacteria	Deltaproteobacteria	Desulfobacterales	Desulfobacteraceae	Saccharibacteria_genera_incertae_sedis	Oceanithermus_profundus
cad4cad5	OTU_3727	6.63636	Bacteria	Proteobacteria	Betaproteobacteria	Neisseriales	Neisseriaceae	Neisseria	Neisseria_dentiae
cad4cad5	OTU_1842	121.364	Bacteria	Actinobacteria	Actinobacteria	Actinomycetales	Streptosporangiaceae	Nonomuraea	Nonomuraea_salmonea
cad4cad5	OTU_3618	6.72727	Bacteria	Actinobacteria	Actinobacteria	Actinomycetales	Actinomycetaceae	Actinomyces	Actinomyces_viscosus
cad4cad5	OTU_3370	5.90909	Bacteria	Proteobacteria	Betaproteobacteria	Neisseriales	Neisseriaceae	Morococcus	Neisseria_animalis
cad4cad5	OTU_5216	8.72727	Bacteria	Bacteroidetes	Bacteroidia	Bacteroidales	Porphyromonadaceae	Porphyromonas	Porphyromonas_catoniae
cad4cad5	OTU_5265	13.5455	Bacteria	Proteobacteria	Deltaproteobacteria	Myxococcales	Labilitrichaceae	Labilithrix	Labilithrix_luteola
cad4cad5	OTU_4201	27.4545	Bacteria	Actinobacteria	Actinobacteria	Actinomycetales	Brevibacteriaceae	Brevibacterium	Brevibacterium_marinum
CYP71A13	OTU_99	1034.83	Bacteria	Proteobacteria	Betaproteobacteria	Burkholderiales	Burkholderiales_incertae_sedis	Sphaerotilus	Sphaerotilus_hippei
CYP71A13	OTU_857	44.9167	Bacteria	Proteobacteria	Alphaproteobacteria	Sneathiellales	Sneathiellaceae	Ferrovibrio	Ferrovibrio_denitrificans
CYP71A13	OTU_730	43.5	Bacteria	Proteobacteria	Gammaproteobacteria	Xanthomonadales	Xanthomonadaceae	Lysobacter	Stenotrophomonas_chelatiphaga
CYP71A13	OTU_1431	16.9167	Bacteria	Chloroflexi	Chloroflexia	Chloroflexales	Chloroflexaceae	Roseiflexus	Roseiflexus_castenholzii
CYP71A13	OTU_1659	15.75	Bacteria	Proteobacteria	Gammaproteobacteria	Xanthomonadales	Sinobacteraceae	Panacagrimonas	Panacagrimonas_perspica
CYP71A13	OTU_428	85.3333	Bacteria	Proteobacteria	Deltaproteobacteria	Myxococcales	Polyangiaceae	Polyangium	Polyangium_fumosum
CYP71A13	OTU_2236	20.9167	Bacteria	Proteobacteria	Gammaproteobacteria	Xanthomonadales	Sinobacteraceae	Steroidobacter	Steroidobacter_agariperforans
CYP71A13	OTU_897	49.75	Bacteria	Actinobacteria	Actinobacteria	Solirubrobacterales	Solirubrobacteraceae	Solirubrobacter	Solirubrobacter_taibaiensis
CYP71A13	OTU_710	37.4167	Bacteria	Proteobacteria	Gammaproteobacteria	Xanthomonadales	Xanthomonadaceae	Arenimonas	Arenimonas_daejeonensis
CYP71A13	OTU_274	204.917	Bacteria	Actinobacteria	Actinobacteria	Actinomycetales	Promicromonosporaceae	Promicromonospora	Promicromonospora_iranensis
CYP71A13	OTU_5066	6.58333	Bacteria	Actinobacteria	Actinobacteria	Actinomycetales	Nocardioidaceae	Nocardioides	Nocardioides_perillae
CYP71A13	OTU_1327	18	Bacteria	Acidobacteria	Acidobacteria_Gp6	Unassigned	Unassigned	Gp6	Unassigned
CYP71A13	OTU_4407	261.75	Bacteria	Actinobacteria	Actinobacteria	Actinomycetales	Sporichthyaceae	Sporichthya	Sporichthya_brevicatena
CYP71A13	OTU_1090	21.25	Bacteria	Proteobacteria	Betaproteobacteria	Burkholderiales	Comamonadaceae	Kinneretia	Kinneretia_asaccharophila
CYP71A13	OTU_272	1059.83	Bacteria	Proteobacteria	Deltaproteobacteria	Myxococcales	Cystobacteraceae	Cystobacter	Cystobacter_badius
CYP71A13	OTU_3685	9.41667	Bacteria	Acidobacteria	Acidobacteria_Gp10	Unassigned	Unassigned	Gp10	Unassigned
CYP71A13	OTU_1334	33.4167	Bacteria	Actinobacteria	Actinobacteria	Actinomycetales	Mycobacteriaceae	Mycobacterium	Mycobacterium_boenickei
CYP71A13	OTU_481	97.6667	Bacteria	Proteobacteria	Gammaproteobacteria	Xanthomonadales	Xanthomonadaceae	Dokdonella	Dokdonella_ginsengisoli
CYP71A13	OTU_394	92.6667	Bacteria	Bacteroidetes	Cytophagia	Cytophagales	Cytophagaceae	Chryseolinea	Chryseolinea_serpens
CYP71A13	OTU_2578	15.5833	Bacteria	Chloroflexi	Chloroflexia	Herpetosiphonales	Herpetosiphonaceae	Herpetosiphon	Roseiflexus_castenholzii
CYP71A13	OTU_1239	13.3333	Bacteria	Actinobacteria	Actinobacteria	Actinomycetales	Micromonosporaceae	Catenuloplanes	Luedemannella_flava
CYP71A13	OTU_1485	23.25	Bacteria	Chloroflexi	Chloroflexia	Chloroflexales	Chloroflexaceae	Herpetosiphon	Roseiflexus_castenholzii
CYP71A13	OTU_1214	25.9167	Bacteria	Actinobacteria	Actinobacteria	Actinomycetales	Nocardiaceae	Gordonia	Gordonia_terrae
CYP71A13	OTU_2620	12.0833	Bacteria	Actinobacteria	Actinobacteria	Coriobacteriales	Coriobacteriaceae	Atopobium	Olsenella_uli
CYP71A13	OTU_1636	14.3333	Bacteria	Proteobacteria	Alphaproteobacteria	Rhodospirillales	Rhodospirillaceae	Dongia	Dongia_mobilis
CYP71A13	OTU_1173	64.5	Bacteria	Firmicutes	Bacilli	Bacillales	Bacillaceae_1	Bacillus	Bacillus_anthracis
CYP71A13	OTU_262	348.833	Bacteria	Proteobacteria	Betaproteobacteria	Burkholderiales	Burkholderiales_incertae_sedis	Aquabacterium	Aquabacterium_citratiphilum
CYP71A13	OTU_1770	8.91667	Bacteria	Proteobacteria	Betaproteobacteria	Burkholderiales	Burkholderiaceae	Cupriavidus	Cupriavidus_alkaliphilus
CYP71A13	OTU_1850	9.58333	Bacteria	Actinobacteria	Actinobacteria	Actinomycetales	Nocardioidaceae	Nocardioides	Nocardioides_iriomotensis
CYP71A13	OTU_1466	31.25	Bacteria	Proteobacteria	Gammaproteobacteria	Xanthomonadales	Xanthomonadaceae	Lysobacter	Lysobacter_daejeonensis
CYP71A13	OTU_1776	15.6667	Bacteria	Actinobacteria	Actinobacteria	Actinomycetales	Nocardioidaceae	Aeromicrobium	Aeromicrobium_fastidiosum
CYP71A13	OTU_4847	15.5833	Bacteria	Acidobacteria	Acidobacteria_Gp6	Unassigned	Unassigned	Gp6	Unassigned
CYP71A13	OTU_1246	20.75	Bacteria	Actinobacteria	Actinobacteria	Actinomycetales	Micromonosporaceae	Catelliglobosispora	Catelliglobosispora_koreensis
CYP71A13	OTU_1506	13.8333	Bacteria	Firmicutes	Bacilli	Lactobacillales	Bacillaceae_2	Lactobacillus	Rubrobacter_bracarensis
CYP71A13	OTU_3292	8.41667	Bacteria	Proteobacteria	Alphaproteobacteria	Rhizobiales	Rhizobiales_incertae_sedis	Vasilyevaea	Vasilyevaea_enhydra
CYP71A13	OTU_1299	18	Bacteria	Actinobacteria	Actinobacteria	Actinomycetales	Geodermatophilaceae	Geodermatophilus	Geodermatophilus_ruber
CYP71A13	OTU_5428	8.91667	Bacteria	Acidobacteria	Acidobacteria_Gp6	Unassigned	Unassigned	Gp6	Unassigned
CYP71A13	OTU_815	47.4167	Bacteria	Proteobacteria	Gammaproteobacteria	Pseudomonadales	Pseudomonadaceae	Azotobacter	Azotobacter_nigricans_subsp._nigricans
CYP71A13	OTU_1661	13.5	Bacteria	Proteobacteria	Alphaproteobacteria	Rhizobiales	Rhizobiaceae	Rhizobium	Rhizobium_flavum
CYP71A13	OTU_714	36.1667	Bacteria	Proteobacteria	Deltaproteobacteria	Syntrophobacterales	Syntrophobacteraceae	Dissulfuribacter	Dissulfuribacter_thermophilus
CYP71A13	OTU_4061	8.16667	Bacteria	Proteobacteria	Alphaproteobacteria	Rhodospirillales	Unassigned	Reyranella	Reyranella_massiliensis
CYP71A13	OTU_3255	12.75	Bacteria	Proteobacteria	Gammaproteobacteria	Xanthomonadales	Sinobacteraceae	Steroidobacter	Steroidobacter_agariperforans
CYP71A13	OTU_3943	8.58333	Bacteria	Parcubacteria	Epsilonproteobacteria	Nautiliales	Nautiliaceae	Parcubacteria_genera_incertae_sedis	Nitratiruptor_tergarcus
CYP71A13	OTU_3141	6.66667	Bacteria	Proteobacteria	Alphaproteobacteria	Rhizobiales	Rhizobiaceae	Rhizobium	Rhizobium_fabae
CYP71A13	OTU_2325	12.5	Bacteria	Proteobacteria	Betaproteobacteria	Burkholderiales	Neisseriaceae	Pseudogulbenkiania	Pseudogulbenkiania_gefcensis
CYP71A13	OTU_1415	13.8333	Bacteria	Actinobacteria	Actinobacteria	Actinomycetales	Nocardioidaceae	Nocardioides	Nocardioides_islandensis
CYP71A13	OTU_2568	24.3333	Bacteria	Proteobacteria	Oligoflexia	Oligoflexales	Oligoflexaceae	Oligoflexus	Oligoflexus_tunisiensis
CYP71A13	OTU_1741	13.4167	Bacteria	Actinobacteria	Actinobacteria	Actinomycetales	Nocardioidaceae	Thermasporomyces	Thermasporomyces_composti
CYP71A13	OTU_2668	7.91667	Bacteria	Actinobacteria	Actinobacteria	Actinomycetales	Iamiaceae	Aquihabitans	Aquihabitans_daechungensis
CYP71A13	OTU_6034	8.08333	Bacteria	Actinobacteria	Actinobacteria	Actinomycetales	Micromonosporaceae	Salinispora	Phytohabitans_rumicis
CYP71A13	OTU_1872	21.0833	Bacteria	Proteobacteria	Gammaproteobacteria	Pseudomonadales	Pseudomonadaceae	Cellvibrio	Cellvibrio_gandavensis
CYP71A13	OTU_1931	12.5833	Bacteria	Proteobacteria	Alphaproteobacteria	Rhizobiales	Rhodobiaceae	Kaistia	Methyloligella_solikamskensis
CYP71A13	OTU_3391	15.4167	Bacteria	Planctomycetes	Planctomycetia	Planctomycetales	Planctomycetaceae	Rhodopirellula	Rhodopirellula_rubra
CYP71A13	OTU_4489	7.75	Bacteria	Firmicutes	Bacilli	Bacillales	Paenibacillaceae_1	Paenibacillus	Paenibacillus_urinalis
CYP71A13	OTU_2914	7.08333	Bacteria	Proteobacteria	Gammaproteobacteria	Xanthomonadales	Sinobacteraceae	Steroidobacter	Steroidobacter_agariperforans
CYP71A13	OTU_5532	7.75	Bacteria	Bacteroidetes	Flavobacteriia	Flavobacteriales	Cryomorphaceae	Cryomorpha	Cryomorpha_ignava
CYP71A13	OTU_850	41.1667	Bacteria	Actinobacteria	Actinobacteria	Actinomycetales	Micromonosporaceae	Actinoplanes	Actinoplanes_xinjiangensis
CYP71A13	OTU_2467	10.25	Bacteria	Actinobacteria	Actinobacteria	Actinomycetales	Micromonosporaceae	Rhizocola	Rhizocola_hellebori
CYP71A13	OTU_2777	10.5833	Bacteria	Proteobacteria	Alphaproteobacteria	Sneathiellales	Sneathiellaceae	Ferrovibrio	Ferrovibrio_denitrificans
CYP71A13	OTU_4148	10.1667	Bacteria	Proteobacteria	Alphaproteobacteria	Rhizobiales	Rhizobiales_incertae_sedis	Amorphus	Amorphus_suaedae
CYP71A13	OTU_4406	7.5	Bacteria	Proteobacteria	Deltaproteobacteria	Myxococcales	Polyangiaceae	Polyangium	Polyangium_fumosum
CYP71A13	OTU_2103	11.9167	Bacteria	Proteobacteria	Betaproteobacteria	Burkholderiales	Oxalobacteraceae	Duganella	Duganella_radicis
CYP71A13	OTU_5082	10.4167	Bacteria	Chloroflexi	Actinobacteria	Caldilineales	Caldilineaceae	Ardenticatena	Ardenticatena_maritima
CYP71A13	OTU_3860	24.1667	Bacteria	Firmicutes	Bacilli	Bacillales	Paenibacillaceae_1	Paenibacillus	Paenibacillus_urinalis
CYP71A13	OTU_4637	8.33333	Bacteria	Bacteroidetes	Flavobacteriia	Flavobacteriales	Flavobacteriaceae	Flavobacterium	Flavobacterium_compostarboris
CYP71A13	OTU_4021	8.08333	Bacteria	Proteobacteria	Alphaproteobacteria	Rhizobiales	Methylobacteriaceae	Methylobacterium	Methylobacterium_fujisawaense
CYP71A13	OTU_3976	7.08333	Bacteria	Proteobacteria	Gammaproteobacteria	Xanthomonadales	Sinobacteraceae	Salinisphaera	Steroidobacter_agariperforans
CYP71A13	OTU_4134	9.33333	Bacteria	Firmicutes	Bacilli	Bacillales	Paenibacillaceae_1	Paenibacillus	Paenibacillus_xylanexedens
CYP71A13	OTU_4578	21.0833	Bacteria	Proteobacteria	Betaproteobacteria	Burkholderiales	Oxalobacteraceae	Massilia	Massilia_kyonggiensis
CYP71A13	OTU_4554	11.5	Bacteria	Proteobacteria	Betaproteobacteria	Burkholderiales	Oxalobacteraceae	Massilia	Massilia_albidiflava
CYP71A13	OTU_3034	31.3333	Bacteria	Proteobacteria	Deltaproteobacteria	Myxococcales	Phaselicystidaceae	Phaselicystis	Phaselicystis_flava
CYP71A13	OTU_5232	15.8333	Bacteria	Bacteroidetes	Flavobacteriia	Flavobacteriales	Flavobacteriaceae	Flavobacterium	Flavobacterium_dankookense
CYP71A13	OTU_4232	14.3333	Bacteria	Proteobacteria	Deltaproteobacteria	Syntrophobacterales	Syntrophobacteraceae	Syntrophobacter	Syntrophobacter_wolinii
CYP71A13	OTU_5062	15.5	Bacteria	Proteobacteria	Alphaproteobacteria	Rhizobiales	Rhizobiaceae	Rhizobium	Rhizobium_smilacinae
CYP71A13	OTU_6393	9.08333	Bacteria	Proteobacteria	Deltaproteobacteria	Myxococcales	Cystobacteraceae	Archangium	Archangium_gephyra
CYP71A13	OTU_1241	111.25	Bacteria	Bacteroidetes	Flavobacteriia	Flavobacteriales	Flavobacteriaceae	Flavobacterium	Flavobacterium_chungangense
CYP71A13	OTU_5346	14.4167	Bacteria	Ignavibacteriae	Ignavibacteria	Ignavibacteriales	Ignavibacteriaceae	Melioribacter	Melioribacter_roseus
CYP71A13	OTU_3444	24.1667	Bacteria	Chloroflexi	Chloroflexia	Herpetosiphonales	Herpetosiphonaceae	Herpetosiphon	Streptomyces_viridis
CYP71A13	OTU_3610	16.75	Bacteria	Proteobacteria	Alphaproteobacteria	Rhizobiales	Hyphomicrobiaceae	Devosia	Devosia_neptuniae
CYP71A13	OTU_4936	42.5833	Bacteria	Firmicutes	Bacilli	Bacillales	Paenibacillaceae_1	Paenibacillus	Paenibacillus_abyssi
CYP71A13	OTU_6271	8.83333	Bacteria	Firmicutes	Bacilli	Bacillales	Paenibacillaceae_1	Paenibacillus	Paenibacillus_nanensis
CYP71A13	OTU_3927	24.25	Bacteria	Proteobacteria	Deltaproteobacteria	Desulfuromonadales	Desulfuromonadaceae	Pelobacter	Pelobacter_acetylenicus
CYP71A13	OTU_847	34.6667	Bacteria	Proteobacteria	Gammaproteobacteria	Xanthomonadales	Xanthomonadaceae	Lysobacter	Lysobacter_enzymogenes
CYP71A13	OTU_4003	12.3333	Bacteria	Proteobacteria	Alphaproteobacteria	Rhizobiales	Rhodobiaceae	Parvibaculum	Parvibaculum_hydrocarboniclasticum
CYP71A13	OTU_4715	15.9167	Bacteria	Actinobacteria	Actinobacteria	Actinomycetales	Nocardioidaceae	Kribbella	Kribbella_antibiotica
CYP71A13	OTU_5023	11	Bacteria	Proteobacteria	Gammaproteobacteria	Xanthomonadales	Xanthomonadaceae	Fulvimonas	Fulvimonas_yonginensis
CYP71A13	OTU_4573	15.5	Bacteria	Proteobacteria	Gammaproteobacteria	Xanthomonadales	Xanthomonadaceae	Dyella	Dyella_terrae
pen2	OTU_1972	1.41667	Bacteria	Actinobacteria	Actinobacteria	Actinomycetales	Cryptosporangiaceae	Cryptosporangium	Cryptosporangium_minutisporangium
pen2	OTU_825	23.1667	Bacteria	Actinobacteria	Actinobacteria	Actinomycetales	Microbacteriaceae	Agromyces	Agromyces_allii
pen2	OTU_831	12.1667	Bacteria	Actinobacteria	Actinobacteria	Actinomycetales	Micromonosporaceae	Virgisporangium	Virgisporangium_aliadipatigenens
pen2	OTU_117	48.25	Bacteria	Cyanobacteria	Cyanobacteria	Unassigned	Family_XIII	GpXIII	Planktothricoides_raciborskii
pen2	OTU_1332	2.25	Bacteria	Actinobacteria	Actinobacteria	Actinomycetales	Kineosporiaceae	Kineosporia	Kineosporia_rhamnosa
pen2	OTU_52	1544.08	Bacteria	Proteobacteria	Betaproteobacteria	Burkholderiales	Oxalobacteraceae	Pseudoduganella	Pseudoduganella_violaceinigra
pen2	OTU_184	237.917	Bacteria	Actinobacteria	Actinobacteria	Actinomycetales	Micromonosporaceae	Actinoplanes	Actinoplanes_rectilineatus
pen2	OTU_3167	0.75	Bacteria	Actinobacteria	Actinobacteria	Actinomycetales	Promicromonosporaceae	Promicromonospora	Promicromonospora_thailandica
pen2	OTU_936	8.91667	Bacteria	Proteobacteria	Betaproteobacteria	Burkholderiales	Oxalobacteraceae	Massilia	Massilia_kyonggiensis
pen2	OTU_792	18.1667	Bacteria	Cyanobacteria	Cyanobacteria	Clostridiales	Family_I	GpI	Prochlorothrix_hollandica
pen2	OTU_2372	3.5	Bacteria	Actinobacteria	Actinobacteria	Actinomycetales	Pseudonocardiaceae	Pseudonocardia	Pseudonocardia_babensis
pen2	OTU_348	42.4167	Bacteria	Cyanobacteria	Cyanobacteria	Clostridiales	Family_I	GpI	Prochlorothrix_hollandica
pen2	OTU_3992	0.833333	Bacteria	Actinobacteria	Actinobacteria	Actinomycetales	Micromonosporaceae	Dactylosporangium	Dactylosporangium_maewongense
pen2	OTU_2564	11.0833	Bacteria	Actinobacteria	Actinobacteria	Actinomycetales	Streptosporangiaceae	Streptosporangium	Streptosporangium_album
pen2	OTU_861	15.25	Bacteria	Proteobacteria	Alphaproteobacteria	Rhizobiales	Methylobacteriaceae	Microvirga	Microvirga_aerilata
pen2	OTU_781	34	Bacteria	Actinobacteria	Actinobacteria	Actinomycetales	Micromonosporaceae	Actinoplanes	Micromonospora_chalcea
pen2	OTU_1468	18.75	Bacteria	Proteobacteria	Alphaproteobacteria	Rhizobiales	Rhizobiaceae	Shinella	Shinella_fusca
pen2	OTU_1228	8.5	Bacteria	Firmicutes	Bacilli	Bacillales	Paenibacillaceae_1	Cohnella	Cohnella_panacarvi
pen2	OTU_1705	2.08333	Bacteria	Actinobacteria	Actinobacteria	Actinomycetales	Micromonosporaceae	Catenuloplanes	Catenuloplanes_crispus
pen2	OTU_2057	3	Bacteria	Actinobacteria	Actinobacteria	Actinomycetales	Nocardioidaceae	Nocardioides	Nocardioides_terrigena
pen2	OTU_4017	4	Bacteria	Proteobacteria	Gammaproteobacteria	Pseudomonadales	Pseudomonadaceae	Pseudomonas	Pseudomonas_alcaliphila
pen2	OTU_258	51	Bacteria	Actinobacteria	Actinobacteria	Actinomycetales	Pseudonocardiaceae	Amycolatopsis	Amycolatopsis_decaplanina
pen2	OTU_2406	12.8333	Bacteria	Actinobacteria	Actinobacteria	Actinomycetales	Nocardioidaceae	Aquihabitans	Aquihabitans_daechungensis
pen2	OTU_6233	0.166667	Bacteria	Proteobacteria	Deltaproteobacteria	Myxococcales	Phaselicystidaceae	Phaselicystis	Phaselicystis_flava
pen2	OTU_1665	2.16667	Bacteria	Proteobacteria	Deltaproteobacteria	Myxococcales	Cystobacteraceae	Stigmatella	Stigmatella_erecta
pen2	OTU_2423	1.41667	Bacteria	Actinobacteria	Actinobacteria	Actinomycetales	Micromonosporaceae	Rhizocola	Rhizocola_hellebori
pen2	OTU_1783	2	Bacteria	Proteobacteria	Betaproteobacteria	Burkholderiales	Oxalobacteraceae	Massilia	Massilia_haematophila
pen2	OTU_3111	0.583333	Bacteria	Proteobacteria	Betaproteobacteria	Burkholderiales	Oxalobacteraceae	Massilia	Massilia_kyonggiensis
pen2	OTU_3901	2.16667	Bacteria	Proteobacteria	Alphaproteobacteria	Rhizobiales	Rhodospirillaceae	Novispirillum	Novispirillum_itersonii_subsp._nipponicum
pen2	OTU_3211	2.75	Bacteria	Chloroflexi	Chloroflexia	Herpetosiphonales	Herpetosiphonaceae	Herpetosiphon	Desulfotalea_arctica
pen2	OTU_2367	1	Bacteria	Chloroflexi	Chloroflexia	Chloroflexales	Chloroflexaceae	Roseiflexus	Roseiflexus_castenholzii
pen2	OTU_814	6.91667	Bacteria	Proteobacteria	Betaproteobacteria	Burkholderiales	Oxalobacteraceae	Massilia	Undibacterium_terreum
pen2	OTU_6037	0	Bacteria	Proteobacteria	Betaproteobacteria	Burkholderiales	Oxalobacteraceae	Massilia	Massilia_haematophila
pen2	OTU_5458	0.333333	Bacteria	Proteobacteria	Betaproteobacteria	Burkholderiales	Oxalobacteraceae	Massilia	Massilia_haematophila
pen2	OTU_1576	5	Bacteria	Proteobacteria	Betaproteobacteria	Burkholderiales	Oxalobacteraceae	Massilia	Massilia_consociata
pen2	OTU_3798	1.66667	Bacteria	Proteobacteria	Deltaproteobacteria	Myxococcales	Haliangiaceae	Haliangium	Haliangium_tepidum
pen2	OTU_3768	0.75	Bacteria	Proteobacteria	Gammaproteobacteria	Pseudomonadales	Pseudomonadaceae	Azotobacter	Azotobacter_nigricans_subsp._nigricans
pen2	OTU_2465	3	Bacteria	Actinobacteria	Actinobacteria	Actinomycetales	Iamiaceae	Aquihabitans	Aquihabitans_daechungensis
pen2	OTU_2504	9.25	Bacteria	Proteobacteria	Alphaproteobacteria	Rhizobiales	Rhizobiaceae	Rhizobium	Rhizobium_mesoamericanum
pen2	OTU_1108	13.75	Bacteria	Actinobacteria	Actinobacteria	Actinomycetales	Streptomycetaceae	Streptomyces	Streptomyces_beijiangensis
pen2	OTU_4679	0.5	Bacteria	Gemmatimonadetes	Gemmatimonadetes	Gemmatimonadales	Gemmatimonadaceae	Gemmatimonas	Gemmatimonas_aurantiaca
pen2	OTU_1337	1	Bacteria	Actinobacteria	Actinobacteria	Actinomycetales	Streptosporangiaceae	Nonomuraea	Nonomuraea_roseola
pen2	OTU_3365	0.5	Bacteria	Proteobacteria	Gammaproteobacteria	Chromatiales	Chromatiaceae	Candidatus_Hydrogenedens	Thiohalorhabdus_denitrificans
pen2	OTU_4458	0	Bacteria	Proteobacteria	Alphaproteobacteria	Rhizobiales	Rhizobiaceae	Rhizobium	Rhizobium_sullae
pen2	OTU_2061	0	Bacteria	Bacteroidetes	Flavobacteriia	Flavobacteriales	Flavobacteriaceae	Flavobacterium	Flavobacterium_ginsengisoli
pen2	OTU_2931	0	Bacteria	Proteobacteria	Alphaproteobacteria	Sphingomonadales	Sphingomonadaceae	Sphingobium	Sphingobium_limneticum
pen2	OTU_1445	0	Bacteria	Bacteroidetes	Flavobacteriia	Flavobacteriales	Flavobacteriaceae	Flavobacterium	Flavobacterium_gyeonganense
pen2	OTU_3489	0	Bacteria	Proteobacteria	Gammaproteobacteria	Aeromonadales	Aeromonadaceae	Aeromonas	Aeromonas_salmonicida_subsp._achromogenes
pen2	OTU_4483	0	Bacteria	Chloroflexi	Chloroflexia	Herpetosiphonales	Herpetosiphonaceae	Herpetosiphon	Solirubrobacter_taibaiensis
pen2	OTU_5209	0	Bacteria	Proteobacteria	Alphaproteobacteria	Caulobacterales	Caulobacteraceae	Caulobacter	Caulobacter_fusiformis
pen2	OTU_3095	0	Bacteria	Bacteroidetes	Flavobacteriia	Flavobacteriales	Flavobacteriaceae	Flavobacterium	Flavobacterium_gyeonganense
pen2	OTU_768	258.5	Bacteria	Proteobacteria	Gammaproteobacteria	Pseudomonadales	Pseudomonadaceae	Rhizobacter	Rivibacter_subsaxonicus
pad3	OTU_1365	23	Bacteria	Proteobacteria	Alphaproteobacteria	Rhizobiales	Rhizobiaceae	Kaistia	Methyloferula_stellata
pad3	OTU_557	66.3333	Bacteria	Actinobacteria	Actinobacteria	Actinomycetales	Pseudonocardiaceae	Actinokineospora	Saccharomonospora_cyanea
pad3	OTU_55	2412	Bacteria	Proteobacteria	Betaproteobacteria	Burkholderiales	Oxalobacteraceae	Herbaspirillum	Herbaspirillum_rubrisubalbicans
pad3	OTU_29	3702	Bacteria	Proteobacteria	Betaproteobacteria	Burkholderiales	Oxalobacteraceae	Herbaspirillum	Herbaspirillum_rubrisubalbicans
pad3	OTU_126	684.5	Bacteria	Proteobacteria	Betaproteobacteria	Burkholderiales	Sulfuricellaceae	Sulfuriferula	Sulfuriferula_multivorans
pad3	OTU_699	75.5833	Bacteria	Proteobacteria	Gammaproteobacteria	Xanthomonadales	Sinobacteraceae	Steroidobacter	Steroidobacter_agariperforans
pad3	OTU_1004	20.0833	Bacteria	Proteobacteria	Alphaproteobacteria	Sneathiellales	Sneathiellaceae	Ferrovibrio	Ferrovibrio_denitrificans
pad3	OTU_2040	23.5833	Bacteria	Chloroflexi	Chloroflexia	Chloroflexales	Chloroflexaceae	Herpetosiphon	Roseiflexus_castenholzii
pad3	OTU_357	338.833	Bacteria	Proteobacteria	Deltaproteobacteria	Myxococcales	Geobacteraceae	Geobacter	Geobacter_anodireducens
pad3	OTU_364	116.167	Bacteria	Proteobacteria	Gammaproteobacteria	Xanthomonadales	Sinobacteraceae	Steroidobacter	Steroidobacter_agariperforans
pad3	OTU_181	284.833	Bacteria	Bacteroidetes	Flavobacteriia	Flavobacteriales	Cryomorphaceae	Crocinitomix	Crocinitomix_catalasitica
pad3	OTU_344	141	Bacteria	Proteobacteria	Gammaproteobacteria	Xanthomonadales	Xanthomonadaceae	Pseudoxanthomonas	Pseudoxanthomonas_gei
pad3	OTU_294	307.75	Bacteria	Proteobacteria	Alphaproteobacteria	Rhizobiales	Bradyrhizobiaceae	Bradyrhizobium	Bradyrhizobium_manausense
pad3	OTU_165	425	Bacteria	Proteobacteria	Betaproteobacteria	Burkholderiales	Oxalobacteraceae	Duganella	Duganella_radicis
pad3	OTU_561	49.4167	Bacteria	Proteobacteria	Gammaproteobacteria	Chromatiales	Sinobacteraceae	Halothiobacillus	Povalibacter_uvarum
pad3	OTU_884	62.8333	Bacteria	Proteobacteria	Deltaproteobacteria	Bdellovibrionales	Bacteriovoracaceae	Bacteriovorax	Bacteriovorax_stolpii
pad3	OTU_281	137.75	Bacteria	Bacteroidetes	Cytophagia	Cytophagales	Flammeovirgaceae	Ohtaekwangia	Ohtaekwangia_koreensis
pad3	OTU_1207	22.5833	Bacteria	Proteobacteria	Alphaproteobacteria	Rhizobiales	Rhodobiaceae	Rhodoligotrophos	Rhodoligotrophos_appendicifer
pad3	OTU_3163	24.5	Bacteria	Actinobacteria	Actinobacteria	Actinomycetales	Micromonosporaceae	Actinoplanes	Actinoplanes_tereljensis
pad3	OTU_1309	59.9167	Bacteria	Firmicutes	Bacilli	Bacillales	Bacillaceae_1	Bacillus	Bacillus_simplex
pad3	OTU_1660	31.6667	Bacteria	Proteobacteria	Alphaproteobacteria	Rhizobiales	Methylobacteriaceae	Microvirga	Microvirga_aerophila
pad3	OTU_998	94.8333	Bacteria	Actinobacteria	Actinobacteria	Actinomycetales	Streptosporangiaceae	Nonomuraea	Nonomuraea_rhizophila
pad3	OTU_881	40.25	Bacteria	Proteobacteria	Alphaproteobacteria	Rhizobiales	Phyllobacteriaceae	Mesorhizobium	Chelativorans_multitrophicus
pad3	OTU_2034	13.0833	Bacteria	Bacteroidetes	Flavobacteriia	Flavobacteriales	Cryomorphaceae	Crocinitomix	Crocinitomix_catalasitica
pad3	OTU_1167	41.5	Bacteria	Acidobacteria	Acidobacteria_Gp10	Acanthopleuribacterales	Acanthopleuribacteraceae	Gp10	Acanthopleuribacter_pedis
pad3	OTU_155	567.917	Bacteria	Proteobacteria	Gammaproteobacteria	Pseudomonadales	Pseudomonadaceae	Pseudomonas	Pseudomonas_lini
pad3	OTU_380	196.417	Bacteria	Proteobacteria	Deltaproteobacteria	Desulfuromonadales	Geobacteraceae	Geobacter	Geobacter_luticola
pad3	OTU_724	50.75	Bacteria	Proteobacteria	Gammaproteobacteria	Xanthomonadales	Sinobacteraceae	Steroidobacter	Steroidobacter_denitrificans
pad3	OTU_4552	8.25	Bacteria	Bacteroidetes	Cytophagia	Cytophagales	Flammeovirgaceae	Chryseolinea	Chryseolinea_serpens
pad3	OTU_1974	9.08333	Bacteria	Proteobacteria	Alphaproteobacteria	Sphingomonadales	Erythrobacteraceae	Altererythrobacter	Parvularcula_bermudensis
pad3	OTU_1109	23.9167	Bacteria	Actinobacteria	Actinobacteria	Actinomycetales	Microbacteriaceae	Agromyces	Agromyces_subbeticus
pad3	OTU_2555	7.33333	Bacteria	Proteobacteria	Alphaproteobacteria	Rhizobiales	Hyphomicrobiaceae	Pedomicrobium	Pedomicrobium_manganicum
pad3	OTU_1262	20.3333	Bacteria	Actinobacteria	Actinobacteria	Actinomycetales	Micromonosporaceae	Dactylosporangium	Dactylosporangium_aurantiacum
pad3	OTU_862	109.583	Bacteria	Firmicutes	Bacilli	Bacillales	Paenibacillaceae_1	Paenibacillus	Paenibacillus_castaneae
pad3	OTU_3339	12.5833	Bacteria	Acidobacteria	Acidobacteria_Gp10	Desulfovibrionales	Desulfohalobiaceae	Gp10	Desulfothermus_naphthae
pad3	OTU_1679	41.5833	Bacteria	Proteobacteria	Deltaproteobacteria	Myxococcales	Polyangiaceae	Polyangium	Polyangium_fumosum
pad3	OTU_430	145.25	Bacteria	Actinobacteria	Actinobacteria	Actinomycetales	Micromonosporaceae	Couchioplanes	Couchioplanes_caeruleus_subsp._azureus
pad3	OTU_2327	7.66667	Bacteria	Proteobacteria	Betaproteobacteria	Rhodocyclales	Rhodocyclaceae	Thauera	Thiobacillus_aquaesulis
pad3	OTU_1058	59.6667	Bacteria	Proteobacteria	Gammaproteobacteria	Oceanospirillales	Pseudomonadaceae	Pseudomonas	Marinobacterium_rhizophilum
pad3	OTU_2254	8.5	Bacteria	Proteobacteria	Alphaproteobacteria	Sphingomonadales	Sphingomonadaceae	Novosphingobium	Parablastomonas_arctica
pad3	OTU_2180	7.75	Bacteria	Actinobacteria	Actinobacteria	Gaiellales	Gaiellaceae	Gaiella	Gaiella_occulta
pad3	OTU_1606	8.75	Bacteria	Proteobacteria	Betaproteobacteria	Burkholderiales	Burkholderiaceae	Cupriavidus	Cupriavidus_alkaliphilus
pad3	OTU_913	28.0833	Bacteria	Bacteroidetes	Flavobacteriia	Flavobacteriales	Cryomorphaceae	Wandonia	Wandonia_haliotis
pad3	OTU_2078	30.3333	Bacteria	Proteobacteria	Deltaproteobacteria	Myxococcales	Haliangiaceae	Haliangium	Haliangium_tepidum
pad3	OTU_1621	10.1667	Bacteria	Bacteroidetes	Cytophagia	Cytophagales	Cyclobacteriaceae	Chryseolinea	Chryseolinea_serpens
pad3	OTU_965	30	Bacteria	Actinobacteria	Actinobacteria	Solirubrobacterales	Conexibacteraceae	Conexibacter	Conexibacter_arvalis
pad3	OTU_930	23	Bacteria	Nitrospirae	Nitrospira	Nitrospirales	Nitrospiraceae	Nitrospira	Unassigned
pad3	OTU_1530	13.75	Bacteria	Proteobacteria	Gammaproteobacteria	Xanthomonadales	Sinobacteraceae	Steroidobacter	Steroidobacter_agariperforans
pad3	OTU_1178	42.75	Bacteria	Proteobacteria	Alphaproteobacteria	Rhizobiales	Phyllobacteriaceae	Chelativorans	Chelativorans_intermedius
pad3	OTU_4068	13	Bacteria	Proteobacteria	Deltaproteobacteria	Desulfuromonadales	Geobacteraceae	Geobacter	Glycocaulis_albus
pad3	OTU_1112	84.5833	Bacteria	Actinobacteria	Actinobacteria	Actinomycetales	Streptomycetaceae	Streptomyces	Streptomyces_koyangensis
pad3	OTU_1118	24.1667	Bacteria	Proteobacteria	Alphaproteobacteria	Caulobacterales	Hyphomonadaceae	Hyphomonas	Hyphomonas_chukchiensis
pad3	OTU_401	167.083	Bacteria	Actinobacteria	Actinobacteria	Actinomycetales	Pseudonocardiaceae	Kibdelosporangium	Kibdelosporangium_phytohabitans
pad3	OTU_3511	13.0833	Bacteria	Proteobacteria	Deltaproteobacteria	Myxococcales	Cystobacteraceae	Aggregicoccus	Aggregicoccus_edonensis
pad3	OTU_402	341.667	Bacteria	Proteobacteria	Gammaproteobacteria	Pseudomonadales	Pseudomonadaceae	Pseudomonas	Pseudomonas_prosekii
pad3	OTU_2158	40.25	Bacteria	Proteobacteria	Deltaproteobacteria	Myxococcales	Polyangiaceae	Sorangium	Sorangium_cellulosum
pad3	OTU_2501	8	Bacteria	Planctomycetes	Planctomycetia	Planctomycetales	Planctomycetaceae	Blastopirellula	Blastopirellula_cremea
pad3	OTU_1718	31.0833	Bacteria	Firmicutes	Bacilli	Bacillales	Bacillaceae_1	Bacillus	Bacillus_safensis
pad3	OTU_1287	25.0833	Bacteria	Proteobacteria	Betaproteobacteria	Burkholderiales	Burkholderiaceae	Chitinimonas	Chitinimonas_viridis
pad3	OTU_1696	21.9167	Bacteria	Actinobacteria	Actinobacteria	Actinomycetales	Microbacteriaceae	Microbacterium	Microbacterium_arabinogalactanolyticum
pad3	OTU_2133	36.1667	Bacteria	Proteobacteria	Deltaproteobacteria	Myxococcales	Desulfuromonadaceae	Sandaracinus	Sandaracinus_amylolyticus
pad3	OTU_1889	10.8333	Bacteria	Proteobacteria	Alphaproteobacteria	Rhizobiales	Rhizobiales_incertae_sedis	Vasilyevaea	Vasilyevaea_enhydra
pad3	OTU_999	40	Bacteria	Proteobacteria	Deltaproteobacteria	Desulfuromonadales	Geobacteraceae	Geobacter	Geoalkalibacter_ferrihydriticus
pad3	OTU_1177	24.1667	Bacteria	Proteobacteria	Alphaproteobacteria	Rhizobiales	Phyllobacteriaceae	Phyllobacterium	Phyllobacterium_myrsinacearum
pad3	OTU_1219	20.3333	Bacteria	Actinobacteria	Actinobacteria	Acidimicrobiales	Acidimicrobiaceae	Ilumatobacter	Ilumatobacter_nonamiense
pad3	OTU_1258	16.6667	Bacteria	Proteobacteria	Alphaproteobacteria	Rhodospirillales	Rhodospirillaceae	Oceanibaculum	Dongia_rigui
pad3	OTU_1326	20.1667	Bacteria	Actinobacteria	Actinobacteria	Actinomycetales	Microbacteriaceae	Microbacterium	Microbacterium_halophilum
pad3	OTU_2451	8.91667	Bacteria	Proteobacteria	Alphaproteobacteria	Rhizobiales	Rhizobiaceae	Rhizobium	Rhizobium_mesosinicum
pad3	OTU_2692	22.3333	Bacteria	Firmicutes	Bacilli	Bacillales	Paenibacillaceae_1	Paenibacillus	Paenibacillus_nanensis
pad3	OTU_1846	14.1667	Bacteria	Spirochaetes	Spirochaetia	Spirochaetales	Leptospiraceae	Turneriella	Turneriella_parva
pad3	OTU_1566	13.8333	Bacteria	Proteobacteria	Alphaproteobacteria	Rhizobiales	Phyllobacteriaceae	Mesorhizobium	Mesorhizobium_gobiense
pad3	OTU_2730	8.16667	Bacteria	Proteobacteria	Alphaproteobacteria	Rhizobiales	Rhizobiaceae	Ensifer	Ensifer_meliloti
pad3	OTU_4539	46.6667	Bacteria	Bacteroidetes	Cytophagia	Cytophagales	Cytophagaceae	Sporocytophaga	Sporocytophaga_myxococcoides
pad3	OTU_1352	32.0833	Bacteria	Proteobacteria	Betaproteobacteria	Burkholderiales	Burkholderiales_incertae_sedis	Aquabacterium	Sphaerotilus_hippei
pad3	OTU_2082	12.0833	Bacteria	Firmicutes	Bacilli	Bacillales	Bacillaceae_1	Bacillus	Bacillus_litoralis
pad3	OTU_1383	44.8333	Bacteria	Proteobacteria	Alphaproteobacteria	Rhizobiales	Hyphomicrobiaceae	Prosthecomicrobium	Prosthecomicrobium_pneumaticum
pad3	OTU_3651	10.3333	Bacteria	Actinobacteria	Actinobacteria	Actinomycetales	Nocardioidaceae	Nocardioides	Nocardioides_agariphilus
pad3	OTU_1655	24.6667	Bacteria	Proteobacteria	Betaproteobacteria	Burkholderiales	Comamonadaceae	Ramlibacter	Sphaerotilus_hippei
pad3	OTU_1540	20.25	Bacteria	Proteobacteria	Betaproteobacteria	Burkholderiales	Burkholderiaceae	Burkholderia	Burkholderia_phymatum
pad3	OTU_1339	14.75	Bacteria	Proteobacteria	Deltaproteobacteria	Syntrophobacterales	Syntrophobacteraceae	Dissulfuribacter	Dissulfuribacter_thermophilus
pad3	OTU_2114	11.4167	Bacteria	Proteobacteria	Alphaproteobacteria	Sphingomonadales	Erythrobacteraceae	Altererythrobacter	Altererythrobacter_troitsensis
pad3	OTU_1739	18.4167	Bacteria	Actinobacteria	Actinobacteria	Actinomycetales	Micromonosporaceae	Catellatospora	Rhizocola_hellebori
pad3	OTU_4153	7.33333	Bacteria	Proteobacteria	Alphaproteobacteria	Sphingomonadales	Sphingomonadaceae	Novosphingobium	Novosphingobium_taihuense
pad3	OTU_1720	11.5833	Bacteria	Proteobacteria	Deltaproteobacteria	Syntrophobacterales	Syntrophobacteraceae	Gp22	Desulfoglaeba_alkanexedens
pad3	OTU_944	27.1667	Bacteria	Proteobacteria	Alphaproteobacteria	Rhizobiales	Rhodobiaceae	Methyloceanibacter	Methyloceanibacter_caenitepidi
pad3	OTU_1578	13.9167	Bacteria	Proteobacteria	Deltaproteobacteria	Desulfuromonadales	Geobacteraceae	Geobacter	Geobacter_pickeringii
pad3	OTU_1473	38.75	Bacteria	Actinobacteria	Actinobacteria	Actinomycetales	Nocardioidaceae	Actinopolymorpha	Aciditerrimonas_ferrireducens
pad3	OTU_2592	88.25	Bacteria	Proteobacteria	Gammaproteobacteria	Chromatiales	Ectothiorhodospiraceae	Acidiferrobacter	Acidiferrobacter_thiooxydans
pad3	OTU_671	62.6667	Bacteria	Proteobacteria	Alphaproteobacteria	Caulobacterales	Caulobacteraceae	Brevundimonas	Brevundimonas_denitrificans
pad3	OTU_1563	13.6667	Bacteria	Proteobacteria	Deltaproteobacteria	Desulfuromonadales	Geobacteraceae	Geobacter	Geobacter_pelophilus
pad3	OTU_1087	45.4167	Bacteria	Proteobacteria	Betaproteobacteria	Methylophilales	Methylophilaceae	Methylophilus	Methylophilus_rhizosphaerae
pad3	OTU_1217	22.1667	Bacteria	Proteobacteria	Alphaproteobacteria	Caulobacterales	Hyphomonadaceae	Hyphomonas	Hyphomonas_neptunium
pad3	OTU_1076	27.1667	Bacteria	Proteobacteria	Betaproteobacteria	Burkholderiales	Burkholderiaceae	Cupriavidus	Cupriavidus_taiwanensis
pad3	OTU_2308	11.0833	Bacteria	Planctomycetes	Phycisphaerae	Phycisphaerales	Phycisphaeraceae	Phycisphaera	Phycisphaera_mikurensis
pad3	OTU_3214	9.08333	Bacteria	Acidobacteria	Acidobacteria_Gp10	Unassigned	Unassigned	Gp10	Unassigned
pad3	OTU_2549	13.1667	Bacteria	Proteobacteria	Alphaproteobacteria	Rhizobiales	Hyphomicrobiaceae	Devosia	Devosia_chinhatensis
pad3	OTU_2001	13.0833	Bacteria	Proteobacteria	Deltaproteobacteria	Myxococcales	Haliangiaceae	Haliangium	Haliangium_tepidum
pad3	OTU_2378	21.6667	Bacteria	Proteobacteria	Betaproteobacteria	Burkholderiales	Comamonadaceae	Ramlibacter	Limnohabitans_planktonicus
pad3	OTU_4585	20.75	Bacteria	Acidobacteria	Acidobacteria_Gp10	Unassigned	Unassigned	Gp10	Unassigned
pad3	OTU_1063	18.5833	Bacteria	Actinobacteria	Actinobacteria	Actinomycetales	Propionibacteriaceae	Microlunatus	Propioniferax_innocua
pad3	OTU_1026	23.9167	Bacteria	Actinobacteria	Actinobacteria	Actinomycetales	Micromonosporaceae	Dactylosporangium	Dactylosporangium_aurantiacum
pad3	OTU_1831	17.6667	Bacteria	Proteobacteria	Deltaproteobacteria	Desulfuromonadales	Desulfuromonadaceae	Pelobacter	Desulfuromusa_ferrireducens
pad3	OTU_1040	51.5	Bacteria	Proteobacteria	Alphaproteobacteria	Rhizobiales	Hyphomicrobiaceae	Pedomicrobium	Pedomicrobium_manganicum
pad3	OTU_2242	9.16667	Bacteria	Bacteroidetes	Cytophagia	Cytophagales	Flammeovirgaceae	Ohtaekwangia	Ohtaekwangia_kribbensis
pad3	OTU_2403	11.0833	Bacteria	Acidobacteria	Acidobacteria_Gp10	Unassigned	Unassigned	Gp10	Unassigned
pad3	OTU_1447	10.5833	Bacteria	Proteobacteria	Gammaproteobacteria	Xanthomonadales	Sinobacteraceae	Steroidobacter	Steroidobacter_agariperforans
pad3	OTU_1797	9.41667	Bacteria	Proteobacteria	Alphaproteobacteria	Rhizobiales	Rhodobiaceae	Methyloceanibacter	Methyloceanibacter_caenitepidi
pad3	OTU_2353	9.75	Bacteria	Actinobacteria	Actinobacteria	Acidimicrobiales	Iamiaceae	Iamia	Iamia_majanohamensis
pad3	OTU_3497	27.5	Bacteria	Proteobacteria	Deltaproteobacteria	Bdellovibrionales	Geobacteraceae	Geobacter	Geobacter_anodireducens
pad3	OTU_3862	5.16667	Bacteria	Proteobacteria	Alphaproteobacteria	Rhizobiales	Phyllobacteriaceae	Mesorhizobium	Mesorhizobium_gobiense
pad3	OTU_2066	9.58333	Bacteria	Proteobacteria	Alphaproteobacteria	Rhizobiales	Xanthobacteraceae	Pseudolabrys	Pseudolabrys_taiwanensis
pad3	OTU_1806	15.3333	Bacteria	Proteobacteria	Alphaproteobacteria	Rhodospirillales	Rhodospirillaceae	Telmatospirillum	Telmatospirillum_siberiense
pad3	OTU_1673	22.3333	Bacteria	Firmicutes	Bacilli	Bacillales	Paenibacillaceae_1	Cohnella	Cohnella_panacarvi
pad3	OTU_1439	37	Bacteria	Proteobacteria	Alphaproteobacteria	Sphingomonadales	Sphingomonadaceae	Sphingomonas	Sphingomonas_kyeonggiensis
pad3	OTU_3155	7.75	Bacteria	Proteobacteria	Alphaproteobacteria	Sphingomonadales	Sphingomonadaceae	Novosphingobium	Parablastomonas_arctica
pad3	OTU_2157	11.1667	Bacteria	Proteobacteria	Deltaproteobacteria	Myxococcales	Haliangiaceae	Haliangium	Haliangium_tepidum
pad3	OTU_3903	7.16667	Bacteria	Proteobacteria	Gammaproteobacteria	Xanthomonadales	Sinobacteraceae	Steroidobacter	Steroidobacter_agariperforans
pad3	OTU_1955	16	Bacteria	Chloroflexi	Chloroflexia	Herpetosiphonales	Herpetosiphonaceae	Herpetosiphon	Caldilinea_aerophila
pad3	OTU_2339	7.75	Bacteria	Proteobacteria	Alphaproteobacteria	Rhizobiales	Rhodobiaceae	Methyloceanibacter	Methyloceanibacter_caenitepidi
pad3	OTU_2631	9.25	Bacteria	Proteobacteria	Alphaproteobacteria	Sphingomonadales	Erythrobacteraceae	Altererythrobacter	Altererythrobacter_dongtanensis
pad3	OTU_3724	6.75	Bacteria	Proteobacteria	Alphaproteobacteria	Rhizobiales	Phyllobacteriaceae	Nitratireductor	Nitratireductor_aquibiodomus
pad3	OTU_4126	20.4167	Bacteria	Proteobacteria	Deltaproteobacteria	Desulfuromonadales	Geobacteraceae	Geobacter	Azospirillum_doebereinerae
pad3	OTU_4104	8.75	Bacteria	Proteobacteria	Deltaproteobacteria	Phycisphaerales	Phycisphaeraceae	Phycisphaera	Phycisphaera_mikurensis
pad3	OTU_1784	9	Bacteria	Proteobacteria	Alphaproteobacteria	Rhodospirillales	Rhodospirillaceae	Oceanibacterium	Oceanibacterium_hippocampi
pad3	OTU_1892	10.0833	Bacteria	Armatimonadetes	Fimbriimonadia	Fimbriimonadales	Fimbriimonadaceae	Armatimonadetes_gp5	Fimbriimonas_ginsengisoli
pad3	OTU_1980	48.4167	Bacteria	Firmicutes	Bacilli	Bacillales	Paenibacillaceae_1	Paenibacillus	Paenibacillus_daejeonensis
pad3	OTU_3438	8.5	Bacteria	Planctomycetes	Planctomycetia	Planctomycetales	Planctomycetaceae	Thermogutta	Thermogutta_hypogea
pad3	OTU_1061	34	Bacteria	Proteobacteria	Deltaproteobacteria	Sphingomonadales	Desulfuromonadaceae	Clostridium_III	Desulfuromusa_ferrireducens
pad3	OTU_4038	5.41667	Bacteria	Proteobacteria	Epsilonproteobacteria	Campylobacterales	Nautiliaceae	Clostridium_sensu_stricto	Desulfocella_halophila
pad3	OTU_1046	68	Bacteria	Proteobacteria	Gammaproteobacteria	Gammaproteobacteria_incertae_sedis	Desulfuromonadaceae	Thiohalorhabdus	Thiohalorhabdus_denitrificans
pad3	OTU_1733	10.0833	Bacteria	Actinobacteria	Actinobacteria	Actinomycetales	Pseudonocardiaceae	Saccharomonospora	Saccharomonospora_cyanea
pad3	OTU_1814	19.6667	Bacteria	Verrucomicrobia	Subdivision3	Unassigned	Unassigned	Subdivision3_genera_incertae_sedis	Terrimicrobium_sacchariphilum
pad3	OTU_2997	11.8333	Bacteria	Proteobacteria	Gammaproteobacteria	Xanthomonadales	Sinobacteraceae	Steroidobacter	Steroidobacter_agariperforans
pad3	OTU_1541	34.3333	Bacteria	Proteobacteria	Alphaproteobacteria	Rhizobiales	Hyphomicrobiaceae	Hyphomicrobium	Hyphomicrobium_vulgare
pad3	OTU_3355	12.9167	Bacteria	Actinobacteria	Actinobacteria	Actinomycetales	Nocardioidaceae	Thermasporomyces	Thermasporomyces_composti
pad3	OTU_2081	23.1667	Bacteria	Firmicutes	Bacilli	Bacillales	Paenibacillaceae_1	Paenibacillus	Paenibacillus_glycanilyticus
pad3	OTU_1150	24.9167	Bacteria	Proteobacteria	Alphaproteobacteria	Caulobacterales	Caulobacteraceae	Caulobacter	Caulobacter_fusiformis
pad3	OTU_2918	10.0833	Bacteria	Chloroflexi	Chloroflexia	Chloroflexales	Chloroflexaceae	Herpetosiphon	Roseiflexus_castenholzii
pad3	OTU_3100	6.66667	Bacteria	Proteobacteria	Deltaproteobacteria	Desulfuromonadales	Desulfuromonadaceae	Desulfuromonas	Desulfuromonas_carbonis
pad3	OTU_2420	13.3333	Bacteria	Proteobacteria	Alphaproteobacteria	Rhizobiales	Hyphomicrobiaceae	Pedomicrobium	Pedomicrobium_manganicum
pad3	OTU_2662	16	Bacteria	Actinobacteria	Actinobacteria	Actinomycetales	Microbacteriaceae	Cryobacterium	Cryobacterium_arcticum
pad3	OTU_1354	18.25	Bacteria	Proteobacteria	Deltaproteobacteria	Myxococcales	Phaselicystidaceae	Phaselicystis	Phaselicystis_flava
pad3	OTU_4658	9.58333	Bacteria	Actinobacteria	Actinobacteria	Actinomycetales	Kineosporiaceae	Kineosporia	Kineosporia_rhamnosa
pad3	OTU_3393	19.4167	Bacteria	Bacteroidetes	Flavobacteriia	Flavobacteriales	Flavobacteriaceae	Flavobacterium	Flavobacterium_hauense
pad3	OTU_829	103.333	Bacteria	Proteobacteria	Betaproteobacteria	Rhodocyclales	Rhodocyclaceae	Uliginosibacterium	Uliginosibacterium_gangwonense
pad3	OTU_3406	12	Bacteria	Proteobacteria	Deltaproteobacteria	Myxococcales	Desulfuromonadaceae	Pelobacter	Pelobacter_acetylenicus
pad3	OTU_3345	7.08333	Bacteria	Proteobacteria	Gemmatimonadetes	Gemmatimonadales	Gemmatimonadaceae	Gemmatimonas	Gemmatimonas_aurantiaca
pad3	OTU_2334	21.5	Bacteria	Firmicutes	Bacilli	Bacillales	Paenibacillaceae_1	Paenibacillus	Paenibacillus_agarexedens
pad3	OTU_2927	6.75	Bacteria	Proteobacteria	Alphaproteobacteria	Rhizobiales	Hyphomicrobiaceae	Pedomicrobium	Pedomicrobium_manganicum
pad3	OTU_5003	5.08333	Bacteria	Firmicutes	Bacilli	Bacillales	Paenibacillaceae_1	Paenibacillus	Paenibacillus_algorifonticola
pad3	OTU_5302	8.08333	Bacteria	Proteobacteria	Alphaproteobacteria	Rhizobiales	Methylobacteriaceae	Microvirga	Microvirga_guangxiensis
pad3	OTU_621	475.667	Bacteria	Proteobacteria	Betaproteobacteria	Burkholderiales	Comamonadaceae	Roseateles	Roseateles_depolymerans
pad3	OTU_1162	31.9167	Bacteria	Proteobacteria	Alphaproteobacteria	Rhizobiales	Bradyrhizobiaceae	Afipia	Afipia_clevelandensis
pad3	OTU_2847	8.41667	Bacteria	Proteobacteria	Alphaproteobacteria	Sphingomonadales	Sphingomonadaceae	Sphingomonas	Sphingomonas_soli
pad3	OTU_1928	70	Bacteria	Proteobacteria	Alphaproteobacteria	Rhizobiales	Beijerinckiaceae	Microvirga	Methylosinus_trichosporium
pad3	OTU_3138	9.5	Bacteria	Proteobacteria	Alphaproteobacteria	Rickettsiales	Rickettsiaceae	Rickettsia	Rickettsia_conorii
pad3	OTU_2022	113.167	Bacteria	Proteobacteria	Gammaproteobacteria	Pseudomonadales	Pseudomonadaceae	Pseudomonas	Pseudomonas_lini
pad3	OTU_2464	22.6667	Bacteria	Chloroflexi	Chloroflexia	Chloroflexales	Chloroflexaceae	Oscillochloris	Roseiflexus_castenholzii
pad3	OTU_2113	31.9167	Bacteria	Proteobacteria	Gammaproteobacteria	Gammaproteobacteria_incertae_sedis	Alteromonadaceae	Porticoccus	Porticoccus_litoralis
pad3	OTU_426	100.167	Bacteria	Actinobacteria	Actinobacteria	Actinomycetales	Micromonosporaceae	Actinoplanes	Actinoplanes_capillaceus
pad3	OTU_1410	29.5	Bacteria	Planctomycetes	Planctomycetia	Planctomycetales	Planctomycetaceae	Pirellula	Pirellula_staleyi
pad3	OTU_2887	9.08333	Bacteria	Elusimicrobia	Endomicrobia	Solirubrobacterales	Solirubrobacteraceae	Candidatus_Endomicrobium	Solirubrobacter_taibaiensis
pad3	OTU_2150	84.0833	Bacteria	Bacteroidetes	Flavobacteriia	Flavobacteriales	Flavobacteriaceae	Flavobacterium	Flavobacterium_anhuiense
pad3	OTU_1898	31.75	Bacteria	Proteobacteria	Deltaproteobacteria	Myxococcales	Polyangiaceae	Sorangium	Sorangium_cellulosum
pad3	OTU_506	88	Bacteria	Cyanobacteria	Cyanobacteria	Unassigned	Family_I	GpI	Rubidibacter_lacunae
pad3	OTU_3072	12.3333	Bacteria	Proteobacteria	Betaproteobacteria	Rhodocyclales	Rhodocyclaceae	Azoarcus	Azoarcus_olearius
pad3	OTU_3354	5.25	Bacteria	Chloroflexi	Chloroflexia	Chloroflexales	Chloroflexaceae	Oscillochloris	Roseiflexus_castenholzii
pad3	OTU_669	156.667	Bacteria	Bacteroidetes	Flavobacteriia	Flavobacteriales	Flavobacteriaceae	Flavobacterium	Flavobacterium_saliperosum
pad3	OTU_1391	38.5833	Bacteria	Actinobacteria	Actinobacteria	Actinomycetales	Streptosporangiaceae	Nonomuraea	Herbidospora_sakaeratensis
pad3	OTU_2032	19.5	Bacteria	Proteobacteria	Gammaproteobacteria	Oceanospirillales	Oceanospirillaceae	Cellvibrio	Cellvibrio_gandavensis
pad3	OTU_3631	13.25	Bacteria	Actinobacteria	Actinobacteria	Actinomycetales	Micromonosporaceae	Verrucosispora	Verrucosispora_sediminis
pad3	OTU_1653	63.25	Bacteria	Bacteroidetes	Flavobacteriia	Flavobacteriales	Flavobacteriaceae	Flavobacterium	Flavobacterium_resistens
pad3	OTU_2496	15.5	Bacteria	Proteobacteria	Alphaproteobacteria	Caulobacterales	Caulobacteraceae	Caulobacter	Caulobacter_fusiformis
pad3	OTU_1290	123.417	Bacteria	Proteobacteria	Betaproteobacteria	Burkholderiales	Comamonadaceae	Pseudorhodoferax	Pseudorhodoferax_soli
pad3	OTU_1948	86	Bacteria	Bacteroidetes	Flavobacteriia	Flavobacteriales	Flavobacteriaceae	Flavobacterium	Flavobacterium_terrae
pad3	OTU_5696	11.1667	Bacteria	Proteobacteria	Gammaproteobacteria	Gammaproteobacteria_incertae_sedis	Xanthomonadaceae	Thiohalorhabdus	Thiohalorhabdus_denitrificans
pad3	OTU_2598	42	Bacteria	Proteobacteria	Alphaproteobacteria	Rhizobiales	Methylobacteriaceae	Microvirga	Variibacter_gotjawalensis
pad3	OTU_5267	11.1667	Bacteria	Proteobacteria	Alphaproteobacteria	Sphingomonadales	Sphingomonadaceae	Sphingobium	Sphingobium_olei
pad3	OTU_1248	56	Bacteria	Actinobacteria	Actinobacteria	Actinomycetales	Promicromonosporaceae	Promicromonospora	Promicromonospora_iranensis
pad3	OTU_3297	11.5	Bacteria	Proteobacteria	Alphaproteobacteria	Rhizobiales	Phyllobacteriaceae	Mesorhizobium	Mesorhizobium_loti
pad3	OTU_1295	65.5	Bacteria	Proteobacteria	Gammaproteobacteria	Chromatiales	Ectothiorhodospiraceae	Ectothiorhodospira	Ectothiorhodospira_variabilis
pad3	OTU_3039	8.83333	Bacteria	Actinobacteria	Actinobacteria	Actinomycetales	Micromonosporaceae	Actinoplanes	Actinoplanes_auranticolor
pad3	OTU_4293	8.16667	Bacteria	Proteobacteria	Gammaproteobacteria	Enterobacteriales	Enterobacteriaceae	Citrobacter	Citrobacter_werkmanii
pad3	OTU_2314	13.75	Bacteria	Actinobacteria	Actinobacteria	Actinomycetales	Micromonosporaceae	Actinoplanes	Actinoplanes_sichuanensis
pad3	OTU_3245	15.6667	Bacteria	Proteobacteria	Deltaproteobacteria	Myxococcales	Polyangiaceae	Polyangium	Polyangium_fumosum
pad3	OTU_3607	9	Bacteria	Proteobacteria	Deltaproteobacteria	Desulfuromonadales	Desulfuromonadaceae	Pelobacter	Pseudobacteriovorax_antillogorgiicola
pad3	OTU_3065	18.1667	Bacteria	Actinobacteria	Actinobacteria	Actinomycetales	Micromonosporaceae	Catenuloplanes	Catenuloplanes_nepalensis
pad3	OTU_6430	10.25	Bacteria	Proteobacteria	Gammaproteobacteria	Rhodocyclales	Rhodocyclaceae	Azoarcus	Halomonas_variabilis
pad3	OTU_3826	22.5833	Bacteria	Proteobacteria	Alphaproteobacteria	Rhizobiales	Methylobacteriaceae	Microvirga	Microvirga_guangxiensis
pad3	OTU_1943	18.75	Bacteria	Proteobacteria	Betaproteobacteria	Burkholderiales	Comamonadaceae	Xenophilus	Xenophilus_arseniciresistens
pad3	OTU_4312	8.08333	Bacteria	Proteobacteria	Ignavibacteria	Ignavibacteriales	Ignavibacteriaceae	Ignavibacterium	Ignavibacterium_album
pad3	OTU_4101	16.9167	Bacteria	Chloroflexi	Chloroflexia	Chloroflexales	Herpetosiphonaceae	Herpetosiphon	Roseiflexus_castenholzii
pad3	OTU_5412	5.91667	Bacteria	Actinobacteria	Actinobacteria	Actinomycetales	Streptomycetaceae	Streptomyces	Streptomyces_aomiensis
pad3	OTU_5063	18.5	Bacteria	Bacteroidetes	Flavobacteriia	Flavobacteriales	Flavobacteriaceae	Flavobacterium	Flavobacterium_anhuiense
pen2pad3	OTU_335	294	Bacteria	Bacteroidetes	Flavobacteriia	Flavobacteriales	Flavobacteriaceae	Flavobacterium	Flavobacterium_terrae
pen2pad3	OTU_1961	31.6667	Bacteria	Firmicutes	Bacilli	Bacillales	Alicyclobacillaceae	Tumebacillus	Tumebacillus_ginsengisoli
pen2pad3	OTU_251	551.583	Bacteria	Bacteroidetes	Cytophagia	Cytophagales	Unassigned	Ohtaekwangia	Ohtaekwangia_koreensis
pen2pad3	OTU_2876	40	Bacteria	Actinobacteria	Actinobacteria	Actinomycetales	Streptomycetaceae	Streptomyces	Streptomyces_lincolnensis
pen2pad3	OTU_2199	10.75	Bacteria	Proteobacteria	Gammaproteobacteria	Xanthomonadales	Xanthomonadaceae	Lysobacter	Lysobacter_gummosus
pen2pad3	OTU_5083	6.5	Bacteria	Bacteroidetes	Flavobacteriia	Flavobacteriales	Flavobacteriaceae	Flavobacterium	Flavobacterium_subsaxonicum
pen2pad3	OTU_149	833.25	Bacteria	Proteobacteria	Betaproteobacteria	Burkholderiales	Oxalobacteraceae	Duganella	Duganella_radicis
pen2pad3	OTU_508	224.75	Bacteria	Actinobacteria	Actinobacteria	Actinomycetales	Pseudonocardiaceae	Actinophytocola	Actinophytocola_burenkhanensis
pen2pad3	OTU_676	70.8333	Bacteria	Proteobacteria	Deltaproteobacteria	Clostridiales	Clostridiaceae_1	Clostridium_sensu_stricto	Desulfovibrio_gigas
pen2pad3	OTU_1542	18.5833	Bacteria	Proteobacteria	Gammaproteobacteria	Chromatiales	Chromatiaceae	Coxiella	Coxiella_burnetii
pen2pad3	OTU_1436	18.1667	Bacteria	Actinobacteria	Actinobacteria	Actinomycetales	Mycobacteriaceae	Mycobacterium	Mycobacterium_pyrenivorans
pen2pad3	OTU_1154	32.5833	Bacteria	Actinobacteria	Actinobacteria	Actinomycetales	Streptosporangiaceae	Planomonospora	Planomonospora_venezuelensis
pen2pad3	OTU_1529	33.25	Bacteria	Proteobacteria	Epsilonproteobacteria	Campylobacterales	Helicobacteraceae	Helicobacter	Nitratifractor_salsuginis
pen2pad3	OTU_2176	13.8333	Bacteria	Firmicutes	Gammaproteobacteria	Lactobacillales	Streptococcaceae	Streptococcus	Streptococcus_dentisani
pen2pad3	OTU_2961	10.75	Bacteria	Chlamydiae	Chlamydiia	Chlamydiales	Parachlamydiaceae	Parachlamydia	Parachlamydia_acanthamoebae
pen2pad3	OTU_2171	23	Bacteria	Proteobacteria	Gammaproteobacteria	Pseudomonadales	Pseudomonadaceae	Pseudomonas	Pseudomonas_alcaliphila
pen2pad3	OTU_3643	5.75	Bacteria	Proteobacteria	Betaproteobacteria	Burkholderiales	Oxalobacteraceae	Herbaspirillum	Herbaspirillum_chlorophenolicum
pen2pad3	OTU_2515	10.5	Bacteria	Proteobacteria	Betaproteobacteria	Burkholderiales	Oxalobacteraceae	Oxalicibacterium	Oxalicibacterium_horti
pen2pad3	OTU_3180	20.75	Bacteria	Bacteroidetes	Cytophagia	Cytophagales	Cytophagaceae	Chryseolinea	Chryseolinea_serpens
pen2pad3	OTU_5884	12.9167	Bacteria	Bacteroidetes	Flavobacteriia	Flavobacteriales	Flavobacteriaceae	Flavobacterium	Flavobacterium_lindanitolerans
pen2pad3	OTU_922	88.5833	Bacteria	Proteobacteria	Alphaproteobacteria	Caulobacterales	Caulobacteraceae	Brevundimonas	Brevundimonas_kwangchunensis
pen2pad3	OTU_943	47.6667	Bacteria	Proteobacteria	Gammaproteobacteria	Chromatiales	Chromatiaceae	Rheinheimera	Rheinheimera_soli
pen2pad3	OTU_3450	31.8333	Bacteria	Proteobacteria	Gammaproteobacteria	Enterobacteriales	Enterobacteriaceae	Enterobacter	Enterobacter_aerogenes
pen2pad3	OTU_1256	95	Bacteria	Bacteroidetes	Flavobacteriia	Flavobacteriales	Flavobacteriaceae	Flavobacterium	Flavobacterium_anhuiense
pen2pad3	OTU_2178	12.75	Bacteria	Proteobacteria	Alphaproteobacteria	Rickettsiales	Rickettsiaceae	Rickettsia	Rickettsia_heilongjiangensis
pen2pad3	OTU_927	99	Bacteria	Bacteroidetes	Flavobacteriia	Flavobacteriales	Flavobacteriaceae	Flavobacterium	Flavobacterium_koreense
pen2pad3	OTU_4763	13.8333	Bacteria	Cyanobacteria	Cyanobacteria	Unassigned	Family_I	GpI	Unassigned
pen2pad3	OTU_3340	22.9167	Bacteria	Proteobacteria	Gammaproteobacteria	Enterobacteriales	Enterobacteriaceae	Enterobacter	Enterobacter_asburiae
pen2pad3	OTU_1710	39.1667	Bacteria	Proteobacteria	Gammaproteobacteria	Legionellales	Coxiellaceae	Diplorickettsia	Diplorickettsia_massiliensis
pen2pad3	OTU_1353	60.5	Bacteria	Proteobacteria	Gammaproteobacteria	Pseudomonadales	Pseudomonadaceae	Cellvibrio	Cellvibrio_ostraviensis
pen2pad3	OTU_4287	19.5833	Bacteria	Proteobacteria	Gammaproteobacteria	Enterobacteriales	Enterobacteriaceae	Citrobacter	Citrobacter_werkmanii
pen2pad3	OTU_4110	12.1667	Bacteria	Proteobacteria	Alphaproteobacteria	Rhizobiales	Brucellaceae	Ochrobactrum	Ochrobactrum_oryzae
pen2pad3	OTU_6050	10.3333	Bacteria	Proteobacteria	Gammaproteobacteria	Enterobacteriales	Enterobacteriaceae	Citrobacter	Citrobacter_werkmanii
pen2pad3	OTU_4217	22.5	Bacteria	Proteobacteria	Deltaproteobacteria	Myxococcales	Desulfuromonadaceae	Pelobacter	Anaeromyxobacter_dehalogenans
pen2pad3	OTU_3907	7.75	Bacteria	Bacteroidetes	Flavobacteriia	Flavobacteriales	Flavobacteriaceae	Flavobacterium	Flavobacterium_saliperosum
pen2pad3	OTU_4942	11	Bacteria	Actinobacteria	Actinobacteria	Actinomycetales	Streptosporangiaceae	Planobispora	Planobispora_rosea
pen2pad3	OTU_1233	210.75	Bacteria	Bacteroidetes	Flavobacteriia	Flavobacteriales	Flavobacteriaceae	Flavobacterium	Flavobacterium_denitrificans
cyp82c2	OTU_270	198.167	Bacteria	Actinobacteria	Actinobacteria	Actinomycetales	Micromonosporaceae	Actinoplanes	Actinoplanes_xinjiangensis
cyp82c2	OTU_1116	72.4167	Bacteria	Actinobacteria	Actinobacteria	Actinomycetales	Micromonosporaceae	Actinoplanes	Actinoplanes_friuliensis
cyp82c2	OTU_615	43.6667	Bacteria	Actinobacteria	Actinobacteria	Gaiellales	Gaiellaceae	Gaiella	Gaiella_occulta
cyp82c2	OTU_871	23	Bacteria	Actinobacteria	Actinobacteria	Actinomycetales	Nocardioidaceae	Nocardioides	Nocardioides_iriomotensis
cyp82c2	OTU_5106	17.9167	Bacteria	Actinobacteria	Actinobacteria	Acidimicrobiales	Iamiaceae	Aquihabitans	Aquihabitans_daechungensis
cyp82c2	OTU_742	37.4167	Bacteria	Proteobacteria	Deltaproteobacteria	Myxococcales	Polyangiaceae	Chondromyces	Chondromyces_robustus
cyp82c2	OTU_1626	13.6667	Bacteria	Actinobacteria	Actinobacteria	Actinomycetales	Nocardioidaceae	Aeromicrobium	Aeromicrobium_halocynthiae
cyp82c2	OTU_837	30.4167	Bacteria	Actinobacteria	Actinobacteria	Solirubrobacterales	Solirubrobacteraceae	Solirubrobacter	Solirubrobacter_soli
cyp82c2	OTU_1442	32.0833	Bacteria	Proteobacteria	Alphaproteobacteria	Rhizobiales	Phyllobacteriaceae	Mesorhizobium	Pseudaminobacter_salicylatoxidans
cyp82c2	OTU_2993	15.5833	Bacteria	Actinobacteria	Actinobacteria	Solirubrobacterales	Solirubrobacteraceae	Solirubrobacter	Solirubrobacter_taibaiensis
cyp82c2	OTU_323	100.083	Bacteria	Proteobacteria	Betaproteobacteria	Burkholderiales	Comamonadaceae	Schlegelella	Schlegelella_aquatica
cyp82c2	OTU_1340	13.0833	Bacteria	Actinobacteria	Actinobacteria	Actinomycetales	Nocardioidaceae	Aeromicrobium	Aeromicrobium_ginsengisoli
cyp82c2	OTU_464	81.9167	Bacteria	Actinobacteria	Actinobacteria	Actinomycetales	Mycobacteriaceae	Mycobacterium	Mycobacterium_frederiksbergense
cyp82c2	OTU_2118	8.58333	Bacteria	Actinobacteria	Actinobacteria	Actinomycetales	Geodermatophilaceae	Blastococcus	Blastococcus_saxobsidens
cyp82c2	OTU_2992	91.9167	Bacteria	Actinobacteria	Actinobacteria	Actinomycetales	Pseudonocardiaceae	Pseudonocardia	Pseudonocardia_babensis
cyp82c2	OTU_2698	10.3333	Bacteria	Planctomycetes	Planctomycetia	Planctomycetales	Planctomycetaceae	Rhodopirellula	Rhodopirellula_rubra
cyp82c2	OTU_795	73.6667	Bacteria	Actinobacteria	Actinobacteria	Actinomycetales	Micromonosporaceae	Polymorphospora	Polymorphospora_rubra
cyp82c2	OTU_773	87.6667	Bacteria	Actinobacteria	Actinobacteria	Actinomycetales	Micromonosporaceae	Virgisporangium	Virgisporangium_ochraceum
cyp82c2	OTU_5605	8.25	Bacteria	Proteobacteria	Deltaproteobacteria	Bdellovibrionales	Bacteriovoracaceae	Peredibacter	Peredibacter_starrii
cyp82c2	OTU_1465	17.4167	Bacteria	Actinobacteria	Actinobacteria	Actinomycetales	Micromonosporaceae	Rhizocola	Rhizocola_hellebori
cyp82c2	OTU_1129	22.5	Bacteria	Actinobacteria	Actinobacteria	Acidimicrobiales	Iamiaceae	Aquihabitans	Aquihabitans_daechungensis
cyp82c2	OTU_2060	11.0833	Bacteria	Actinobacteria	Actinobacteria	Actinomycetales	Microbacteriaceae	Agromyces	Agromyces_cerinus_subsp._nitratus
cyp82c2	OTU_350	175.333	Bacteria	Bacteroidetes	Cytophagia	Cytophagales	Unassigned	Ohtaekwangia	Ohtaekwangia_koreensis
cyp82c2	OTU_1336	37.5	Bacteria	Firmicutes	Bacilli	Bacillales	Bacillaceae_1	Bacillus	Bacillus_murimartini
cyp82c2	OTU_2243	22.25	Bacteria	Proteobacteria	Alphaproteobacteria	Rhizobiales	Methylobacteriaceae	Microvirga	Microvirga_aerophila
cyp82c2	OTU_2019	7.5	Bacteria	Proteobacteria	Alphaproteobacteria	Rhizobiales	Methylobacteriaceae	Meganema	Ancylobacter_polymorphus
cyp82c2	OTU_639	87	Bacteria	Proteobacteria	Gammaproteobacteria	Pseudomonadales	Pseudomonadaceae	Cellvibrio	Cellvibrio_gandavensis
cyp82c2	OTU_3998	28.8333	Bacteria	Candidatus_Saccharibacteria	Deltaproteobacteria	Desulfobacterales	Desulfobulbaceae	Saccharibacteria_genera_incertae_sedis	Desulfotalea_arctica
cyp82c2	OTU_1409	12.4167	Bacteria	Proteobacteria	Deltaproteobacteria	Deltaproteobacteria_incertae_sedis	Syntrophobacteraceae	Dissulfuribacter	Dissulfuribacter_thermophilus
cyp82c2	OTU_1573	12.75	Bacteria	Proteobacteria	Betaproteobacteria	Burkholderiales	Comamonadaceae	Ramlibacter	Sphaerotilus_hippei
cyp82c2	OTU_3038	6.41667	Bacteria	Planctomycetes	Planctomycetia	Planctomycetales	Planctomycetaceae	Singulisphaera	Singulisphaera_rosea
cyp82c2	OTU_1532	15.4167	Bacteria	Actinobacteria	Actinobacteria	Actinomycetales	Nocardioidaceae	Aeromicrobium	Aeromicrobium_ginsengisoli
cyp82c2	OTU_1489	13.5	Bacteria	Proteobacteria	Deltaproteobacteria	Myxococcales	Polyangiaceae	Minicystis	Minicystis_rosea
cyp82c2	OTU_3156	12.6667	Bacteria	Proteobacteria	Gammaproteobacteria	Oceanospirillales	Oceanospirillaceae	Nitrincola	Nitrincola_lacisaponensis
cyp82c2	OTU_1267	15.6667	Bacteria	Actinobacteria	Actinobacteria	Actinomycetales	Nocardioidaceae	Aeromicrobium	Aeromicrobium_ginsengisoli
cyp82c2	OTU_5243	9.25	Bacteria	Actinobacteria	Actinobacteria	Actinomycetales	Nocardioidaceae	Nocardioides	Nocardioides_nanhaiensis
cyp82c2	OTU_3050	21.25	Bacteria	Proteobacteria	Deltaproteobacteria	Myxococcales	Cystobacteraceae	Nannocystis	Nannocystis_exedens
cyp82c2	OTU_4392	5.16667	Bacteria	Actinobacteria	Actinobacteria	Actinomycetales	Cellulomonadaceae	Cellulomonas	Cellulomonas_biazotea
cyp82c2	OTU_2028	26.75	Bacteria	Proteobacteria	Deltaproteobacteria	Myxococcales	Cystobacteraceae	Anaeromyxobacter	Anaeromyxobacter_dehalogenans
cyp82c2	OTU_1886	39.75	Bacteria	Firmicutes	Bacilli	Bacillales	Bacillaceae_1	Bacillus	Bacillus_trypoxylicola
cyp82c2	OTU_502	158.333	Bacteria	Actinobacteria	Actinobacteria	Actinomycetales	Pseudonocardiaceae	Kibdelosporangium	Kibdelosporangium_phytohabitans
cyp82c2	OTU_797	49.6667	Bacteria	Proteobacteria	Betaproteobacteria	Burkholderiales	Alcaligenaceae	Achromobacter	Achromobacter_mucicolens
cyp82c2	OTU_2890	6.5	Bacteria	Proteobacteria	Deltaproteobacteria	Desulfuromonadales	Geobacteraceae	Geobacter	Geobacter_pickeringii
cyp82c2	OTU_1860	15.1667	Bacteria	Actinobacteria	Actinobacteria	Actinomycetales	Mycobacteriaceae	Mycobacterium	Mycobacterium_chlorophenolicum
cyp82c2	OTU_827	65.3333	Bacteria	Acidobacteria	Acidobacteria_Gp10	Desulfuromonadales	Desulfuromonadaceae	Gp10	Geopsychrobacter_electrodiphilus
cyp82c2	OTU_1908	6.83333	Bacteria	Actinobacteria	Actinobacteria	Gaiellales	Gaiellaceae	Gaiella	Gaiella_occulta
cyp82c2	OTU_6367	5.58333	Bacteria	Proteobacteria	Alphaproteobacteria	Sneathiellales	Sneathiellaceae	Ferrovibrio	Ferrovibrio_denitrificans
cyp82c2	OTU_4901	6.5	Bacteria	Actinobacteria	Actinobacteria	Actinomycetales	Thermomonosporaceae	Actinomadura	Actinomadura_kijaniata
cyp82c2	OTU_1868	11.9167	Bacteria	Actinobacteria	Actinobacteria	Actinomycetales	Micromonosporaceae	Couchioplanes	Couchioplanes_caeruleus_subsp._azureus
cyp82c2	OTU_2877	15.0833	Bacteria	Actinobacteria	Actinobacteria	Actinomycetales	Thermomonosporaceae	Actinomadura	Actinomadura_fulvescens
cyp82c2	OTU_2720	17.3333	Bacteria	Proteobacteria	Alphaproteobacteria	Sphingomonadales	Sphingomonadaceae	Sphingopyxis	Sphingopyxis_panaciterrae
cyp82c2	OTU_2479	15	Bacteria	Proteobacteria	Gammaproteobacteria	Xanthomonadales	Sinobacteraceae	Steroidobacter	Steroidobacter_agariperforans
cyp82c2	OTU_3293	11.8333	Bacteria	Actinobacteria	Actinobacteria	Actinomycetales	Acidimicrobineae_incertae_sedis	Aciditerrimonas	Aciditerrimonas_ferrireducens
cyp82c2	OTU_2505	16.8333	Bacteria	Proteobacteria	Deltaproteobacteria	Myxococcales	Cystobacteraceae	Cystobacter	Sandaracinus_amylolyticus
cyp82c2	OTU_4537	13.6667	Bacteria	Chloroflexi	Chloroflexia	Chloroflexales	Chloroflexaceae	Roseiflexus	Roseiflexus_castenholzii
cyp82c2	OTU_1906	9.83333	Bacteria	Proteobacteria	Betaproteobacteria	Burkholderiales	Burkholderiaceae	Chitinimonas	Chitinimonas_koreensis
cyp82c2	OTU_2049	8.83333	Bacteria	Proteobacteria	Alphaproteobacteria	Rhizobiales	Phyllobacteriaceae	Mesorhizobium	Mesorhizobium_hawassense
cyp82c2	OTU_5900	10.25	Bacteria	Actinobacteria	Actinobacteria	Actinomycetales	Nocardioidaceae	Nocardioides	Nocardioides_dubius
cyp82c2	OTU_3882	8.58333	Bacteria	Proteobacteria	Betaproteobacteria	Burkholderiales	Alcaligenaceae	Achromobacter	Achromobacter_anxifer
cyp82c2	OTU_1940	49.1667	Bacteria	Chloroflexi	Chloroflexia	Chloroflexales	Chloroflexaceae	Roseiflexus	Roseiflexus_castenholzii
cyp82c2	OTU_1749	13.0833	Bacteria	Spirochaetes	Spirochaetia	Spirochaetales	Spirochaetaceae	Spirochaeta	Salinispira_pacifica
cyp82c2	OTU_4636	15.0833	Bacteria	Actinobacteria	Actinobacteria	Actinomycetales	Streptosporangiaceae	Herbidospora	Herbidospora_daliensis
cyp82c2	OTU_4423	6.58333	Bacteria	Actinobacteria	Actinobacteria	Actinomycetales	Microbacteriaceae	Microbacterium	Microbacterium_xylanilyticum
cyp82c2	OTU_3753	43.8333	Bacteria	Proteobacteria	Deltaproteobacteria	Desulfuromonadales	Desulfuromonadaceae	Sandaracinus	Sandaracinus_amylolyticus
cyp82c2	OTU_3500	6.75	Bacteria	Actinobacteria	Actinobacteria	Actinomycetales	Micromonosporaceae	Catellatospora	Catellatospora_bangladeshensis
cyp82c2	OTU_5079	7.91667	Bacteria	Proteobacteria	Betaproteobacteria	Rhodocyclales	Rhodocyclaceae	Georgfuchsia	Georgfuchsia_toluolica
cyp82c2	OTU_5135	195.083	Bacteria	Bacteroidetes	Flavobacteriia	Flavobacteriales	Flavobacteriaceae	Flavobacterium	Flavobacterium_palustre
cyp82c2	OTU_5041	8.5	Bacteria	Proteobacteria	Alphaproteobacteria	Caulobacterales	Hyphomonadaceae	Hyphomonas	Hyphomonas_chukchiensis
cyp82c2	OTU_4152	7.16667	Bacteria	Firmicutes	Bacilli	Bacillales	Paenibacillaceae_1	Paenibacillus	Paenibacillus_panacisoli
cyp82c2	OTU_3970	11.8333	Bacteria	Actinobacteria	Actinobacteria	Actinomycetales	Micromonosporaceae	Verrucosispora	Verrucosispora_wenchangensis
cyp82c2	OTU_3432	8.41667	Bacteria	Proteobacteria	Betaproteobacteria	Burkholderiales	Comamonadaceae	Comamonas	Comamonas_testosteroni
cyp82c2	OTU_3043	23.5	Bacteria	Actinobacteria	Actinobacteria	Actinomycetales	Micromonosporaceae	Catellatospora	Catellatospora_bangladeshensis
cyp82c2	OTU_1740	71.6667	Bacteria	Bacteroidetes	Flavobacteriia	Flavobacteriales	Flavobacteriaceae	Flavobacterium	Flavobacterium_nitratireducens
cyp82c2	OTU_2253	37.5	Bacteria	Proteobacteria	Alphaproteobacteria	Rhizobiales	Brucellaceae	Ochrobactrum	Ochrobactrum_tritici
cyp82c2	OTU_5133	15.25	Bacteria	Proteobacteria	Alphaproteobacteria	Rhizobiales	Phyllobacteriaceae	Phyllobacterium	Phyllobacterium_myrsinacearum
cyp82c2	OTU_5486	9.58333	Bacteria	Actinobacteria	Actinobacteria	Actinomycetales	Iamiaceae	Aquihabitans	Aquihabitans_daechungensis
cyp82c2	OTU_5067	11	Bacteria	Actinobacteria	Actinobacteria	Actinomycetales	Streptosporangiaceae	Streptosporangium	Streptosporangium_amethystogenes_subsp._fukuiense
cyp82c2	OTU_4966	17.4167	Bacteria	Actinobacteria	Actinobacteria	Actinomycetales	Corynebacteriaceae	Corynebacterium	Corynebacterium_tuberculostearicum
nic	OTU_56	1294.58	Bacteria	Actinobacteria	Actinobacteria	Actinomycetales	Micromonosporaceae	Actinoplanes	Actinoplanes_rectilineatus
nic	OTU_162	744.5	Bacteria	Actinobacteria	Actinobacteria	Actinomycetales	Pseudonocardiaceae	Lentzea	Lentzea_jiangxiensis
nic	OTU_1637	11.5	Bacteria	Actinobacteria	Actinobacteria	Actinomycetales	Sporichthyaceae	Sporichthya	Sporichthya_polymorpha
nic	OTU_110	873.667	Bacteria	Proteobacteria	Betaproteobacteria	Burkholderiales	Oxalobacteraceae	Pseudoduganella	Pseudoduganella_violaceinigra
nic	OTU_2072	10.5833	Bacteria	Proteobacteria	Alphaproteobacteria	Rhizobiales	Phyllobacteriaceae	Mesorhizobium	Mesorhizobium_hawassense
nic	OTU_845	53.25	Bacteria	Actinobacteria	Actinobacteria	Actinomycetales	Geodermatophilaceae	Blastococcus	Blastococcus_saxobsidens
nic	OTU_438	179.5	Bacteria	Actinobacteria	Actinobacteria	Actinomycetales	Kineosporiaceae	Kineosporia	Kineosporia_rhamnosa
nic	OTU_463	174.667	Bacteria	Firmicutes	Bacilli	Bacillales	Bacillaceae_1	Bacillus	Bacillus_huizhouensis
nic	OTU_1548	21	Bacteria	Bacteroidetes	Cytophagia	Cytophagales	Cytophagaceae	Ohtaekwangia	Ohtaekwangia_koreensis
nic	OTU_668	151.5	Bacteria	Bacteroidetes	Flavobacteriia	Flavobacteriales	Flavobacteriaceae	Flavobacterium	Flavobacterium_hauense
nic	OTU_644	465.333	Bacteria	Proteobacteria	Betaproteobacteria	Burkholderiales	Oxalobacteraceae	Pseudoduganella	Pseudoduganella_violaceinigra
nic	OTU_6061	35.0833	Bacteria	Proteobacteria	Betaproteobacteria	Burkholderiales	Oxalobacteraceae	Massilia	Massilia_kyonggiensis
nic	OTU_2410	6.58333	Bacteria	Actinobacteria	Actinobacteria	Acidimicrobiales	Acidimicrobiaceae	Ilumatobacter	Ilumatobacter_fluminis
nic	OTU_1794	9	Bacteria	Actinobacteria	Actinobacteria	Actinomycetales	Kineosporiaceae	Kineosporia	Kineosporia_rhamnosa
nic	OTU_342	242.833	Bacteria	Proteobacteria	Deltaproteobacteria	Myxococcales	Polyangiaceae	Chondromyces	Chondromyces_pediculatus
nic	OTU_745	107.75	Bacteria	Proteobacteria	Betaproteobacteria	Burkholderiales	Oxalobacteraceae	Massilia	Massilia_namucuonensis
nic	OTU_4162	24.5833	Bacteria	Actinobacteria	Actinobacteria	Actinomycetales	Micromonosporaceae	Micromonospora	Micromonospora_wenchangensis
nic	OTU_1460	41	Bacteria	Actinobacteria	Actinobacteria	Actinomycetales	Mycobacteriaceae	Mycobacterium	Mycobacterium_aromaticivorans
nic	OTU_4453	39	Bacteria	Proteobacteria	Alphaproteobacteria	Rhizobiales	Rhizobiaceae	Shinella	Shinella_zoogloeoides
nic	OTU_2355	62.4167	Bacteria	Actinobacteria	Actinobacteria	Actinomycetales	Micromonosporaceae	Phytohabitans	Phytohabitans_flavus
nic	OTU_4830	19.4167	Bacteria	Firmicutes	Bacilli	Bacillales	Paenibacillaceae_1	Paenibacillus	Paenibacillus_xylanexedens
nic	OTU_1484	12.75	Bacteria	Actinobacteria	Actinobacteria	Gaiellales	Gaiellaceae	Gaiella	Gaiella_occulta
nic	OTU_6126	8.33333	Bacteria	Firmicutes	Bacilli	Bacillales	Paenibacillaceae_1	Paenibacillus	Paenibacillus_illinoisensis
nic	OTU_3674	19.6667	Bacteria	Firmicutes	Bacilli	Bacillales	Thermoactinomycetaceae_1	Shimazuella	Shimazuella_kribbensis
nic	OTU_1213	18.75	Bacteria	Proteobacteria	Gammaproteobacteria	Chromatiales	Ectothiorhodospiraceae	Ectothiorhodospira	Ectothiorhodospira_salini
nic	OTU_2345	7.5	Bacteria	Actinobacteria	Actinobacteria	Actinomycetales	Nocardioidaceae	Nocardioides	Nocardioides_dilutus
nic	OTU_1490	31.4167	Bacteria	Firmicutes	Bacilli	Bacillales	Bacillaceae_1	Bacillus	Bacillus_kribbensis
nic	OTU_858	72.6667	Bacteria	Proteobacteria	Betaproteobacteria	Burkholderiales	Oxalobacteraceae	Massilia	Massilia_haematophila
nic	OTU_2945	9.83333	Bacteria	Firmicutes	Bacilli	Bacillales	Planococcaceae	Planococcus	Planococcus_donghaensis
nic	OTU_2623	71.1667	Bacteria	Proteobacteria	Gammaproteobacteria	Xanthomonadales	Sinobacteraceae	Steroidobacter	Steroidobacter_agariperforans
nic	OTU_1933	9.5	Bacteria	Proteobacteria	Betaproteobacteria	Burkholderiales	Burkholderiales_incertae_sedis	Rhizobacter	Piscinibacter_aquaticus
nic	OTU_2052	15.4167	Bacteria	Actinobacteria	Actinobacteria	Actinomycetales	Nocardioidaceae	Aeromicrobium	Aeromicrobium_ponti
nic	OTU_2791	10.8333	Bacteria	Firmicutes	Bacilli	Bacillales	Paenibacillaceae_1	Paenibacillus	Paenibacillus_rigui
nic	OTU_859	144.917	Bacteria	Proteobacteria	Betaproteobacteria	Burkholderiales	Burkholderiales_incertae_sedis	Piscinibacter	Piscinibacter_aquaticus
nic	OTU_1401	44.4167	Bacteria	Actinobacteria	Actinobacteria	Actinomycetales	Micromonosporaceae	Polymorphospora	Polymorphospora_rubra
nic	OTU_1286	17.0833	Bacteria	Actinobacteria	Actinobacteria	Gaiellales	Gaiellaceae	Gaiella	Gaiella_occulta
nic	OTU_2840	13.9167	Bacteria	Actinobacteria	Actinobacteria	Actinomycetales	Micromonosporaceae	Micromonospora	Micromonospora_chokoriensis
nic	OTU_2045	33.8333	Bacteria	Proteobacteria	Alphaproteobacteria	Sphingomonadales	Sphingomonadaceae	Sphingomonas	Sphingomonas_kyeonggiensis
nic	OTU_1826	13.6667	Bacteria	Proteobacteria	Alphaproteobacteria	Rhizobiales	Methylobacteriaceae	Microvirga	Microvirga_lupini
nic	OTU_1192	18.5833	Bacteria	Proteobacteria	Alphaproteobacteria	Rhizobiales	Hyphomicrobiaceae	Pedomicrobium	Pedomicrobium_manganicum
nic	OTU_5529	9.91667	Bacteria	Firmicutes	Bacilli	Bacillales	Paenibacillaceae_2	Ammoniphilus	Ammoniphilus_oxalivorans
nic	OTU_5104	9.83333	Bacteria	Proteobacteria	Alphaproteobacteria	Rhizobiales	Aurantimonadaceae	Aureimonas	Jiella_aquimaris
nic	OTU_2323	14.9167	Bacteria	Actinobacteria	Actinobacteria	Actinomycetales	Kineosporiaceae	Kineosporia	Kineosporia_rhamnosa
nic	OTU_2415	8.83333	Bacteria	Proteobacteria	Alphaproteobacteria	Rhizobiales	Rhizobiaceae	Kaistia	Kaistia_hirudinis
nic	OTU_3104	30.5833	Bacteria	Firmicutes	Bacilli	Bacillales	Paenibacillaceae_1	Paenibacillus	Paenibacillus_amylolyticus
nic	OTU_1849	10.5	Bacteria	Proteobacteria	Deltaproteobacteria	Myxococcales	Polyangiaceae	Chondromyces	Chondromyces_crocatus
nic	OTU_3403	12.1667	Bacteria	Proteobacteria	Alphaproteobacteria	Rhizobiales	Methylobacteriaceae	Microvirga	Microvirga_flocculans
nic	OTU_3300	9.66667	Bacteria	Actinobacteria	Actinobacteria	Actinomycetales	Micromonosporaceae	Dactylosporangium	Dactylosporangium_aurantiacum
nic	OTU_3398	14.75	Bacteria	Actinobacteria	Actinobacteria	Actinomycetales	Micromonosporaceae	Planosporangium	Planosporangium_flavigriseum
nic	OTU_567	13.75	Bacteria	Proteobacteria	Deltaproteobacteria	Myxococcales	Polyangiaceae	Chondromyces	Byssovorax_cruenta
nic	OTU_2775	16.5833	Bacteria	Proteobacteria	Deltaproteobacteria	Myxococcales	Phaselicystidaceae	Phaselicystis	Phaselicystis_flava
nic	OTU_3514	23.3333	Bacteria	Actinobacteria	Actinobacteria	Actinomycetales	Thermomonosporaceae	Actinomadura	Actinomadura_yumaensis
nic	OTU_1179	64.75	Bacteria	Proteobacteria	Betaproteobacteria	Burkholderiales	Comamonadaceae	Pseudorhodoferax	Pseudorhodoferax_soli
nic	OTU_1594	23.6667	Bacteria	Actinobacteria	Actinobacteria	Actinomycetales	Kineosporiaceae	Kineosporia	Kineosporia_rhamnosa
nic	OTU_5353	6.91667	Bacteria	Bacteroidetes	Flavobacteriia	Flavobacteriales	Flavobacteriaceae	Flavobacterium	Flavobacterium_beibuense
nic	OTU_1764	26	Bacteria	Proteobacteria	Gammaproteobacteria	Xanthomonadales	Sinobacteraceae	Povalibacter	Povalibacter_uvarum
nic	OTU_607	8.75	Bacteria	Actinobacteria	Actinobacteria	Actinomycetales	Micromonosporaceae	Actinoplanes	Actinoplanes_rectilineatus
nic	OTU_4835	7.91667	Bacteria	Verrucomicrobia	Spartobacteria	Unassigned	Unassigned	Spartobacteria_genera_incertae_sedis	Unassigned
nic	OTU_3362	26	Bacteria	Proteobacteria	Deltaproteobacteria	Myxococcales	Polyangiaceae	Chondromyces	Anaeromyxobacter_dehalogenans
nic	OTU_5322	11.1667	Bacteria	Firmicutes	Bacilli	Bacillales	Thermoactinomycetaceae_1	Shimazuella	Shimazuella_kribbensis
nic	OTU_2104	63.25	Bacteria	Actinobacteria	Actinobacteria	Actinomycetales	Pseudonocardiaceae	Crossiella	Crossiella_cryophila
nic	OTU_6241	9.41667	Bacteria	Chloroflexi	Chloroflexia	Chloroflexales	Oscillochloridaceae	Oscillochloris	Roseiflexus_castenholzii
ugt74f2	OTU_374	563	Bacteria	Actinobacteria	Actinobacteria	Actinomycetales	Microbacteriaceae	Microbacterium	Microbacterium_pygmaeum
ugt74f2	OTU_328	197.917	Bacteria	Chloroflexi	Chloroflexia	Herpetosiphonales	Herpetosiphonaceae	Herpetosiphon	Cystobacter_badius
ugt74f2	OTU_1113	54.25	Bacteria	Bacteroidetes	Flavobacteriia	Flavobacteriales	Flavobacteriaceae	Flavobacterium	Flavobacterium_hauense
ugt74f2	OTU_309	421.833	Bacteria	Proteobacteria	Gammaproteobacteria	Pseudomonadales	Pseudomonadaceae	Pseudomonas	Pseudomonas_alcaliphila
ugt74f2	OTU_3168	9.33333	Bacteria	Acidobacteria	Acidobacteria_Gp10	Unassigned	Unassigned	Gp10	Unassigned
ugt74f2	OTU_794	51	Bacteria	Proteobacteria	Deltaproteobacteria	Myxococcales	Haliangiaceae	Haliangium	Haliangium_tepidum
ugt74f2	OTU_1379	24.0833	Bacteria	Cyanobacteria	Cyanobacteria	Unassigned	Family_XIII	GpXIII	Planktothricoides_raciborskii
ugt74f2	OTU_1561	14.4167	Bacteria	Proteobacteria	Alphaproteobacteria	Rhodobacterales	Rhodobacteraceae	Rhodobacter	Rhodobacter_blasticus
ugt74f2	OTU_530	168.333	Bacteria	Proteobacteria	Alphaproteobacteria	Caulobacterales	Caulobacteraceae	Brevundimonas	Brevundimonas_kwangchunensis
ugt74f2	OTU_2537	26.0833	Bacteria	Proteobacteria	Deltaproteobacteria	Myxococcales	Polyangiaceae	Polyangium	Polyangium_fumosum
ugt74f2	OTU_3704	4.5	Bacteria	Proteobacteria	Deltaproteobacteria	Myxococcales	Phaselicystidaceae	Phaselicystis	Phaselicystis_flava
ugt74f2	OTU_1294	22	Bacteria	Actinobacteria	Actinobacteria	Actinomycetales	Cellulomonadaceae	Cellulomonas	Cellulomonas_xylanilytica
ugt74f2	OTU_3328	7.5	Bacteria	Proteobacteria	Deltaproteobacteria	Myxococcales	Sandaracinaceae	Sandaracinus	Sandaracinus_amylolyticus
ugt74f2	OTU_1748	66.0833	Bacteria	Proteobacteria	Betaproteobacteria	Burkholderiales	Comamonadaceae	Pseudorhodoferax	Pseudorhodoferax_aquiterrae
ugt74f2	OTU_3366	7	Bacteria	Firmicutes	Clostridia	Clostridiales	Peptostreptococcaceae	Romboutsia	Romboutsia_ilealis
ugt74f2	OTU_2234	5.25	Bacteria	Actinobacteria	Actinobacteria	Actinomycetales	Pseudonocardiaceae	Actinophytocola	Actinophytocola_timorensis
ugt74f2	OTU_2358	13.6667	Bacteria	Proteobacteria	Deltaproteobacteria	Myxococcales	Polyangiaceae	Chondromyces	Chondromyces_pediculatus
ugt74f2	OTU_2182	10	Bacteria	Actinobacteria	Actinobacteria	Actinomycetales	Cellulomonadaceae	Cellulomonas	Cellulomonas_soli
ugt74f2	OTU_878	44.6667	Bacteria	Proteobacteria	Deltaproteobacteria	Desulfuromonadales	Geobacteraceae	Geobacter	Geobacter_argillaceus
ugt74f2	OTU_2954	16.25	Bacteria	Firmicutes	Bacilli	Bacillales	Paenibacillaceae_1	Brevibacillus	Brevibacillus_formosus
ugt74f2	OTU_1289	31	Bacteria	Proteobacteria	Alphaproteobacteria	Rhizobiales	Rhizobiaceae	Shinella	Shinella_fusca
ugt74f2	OTU_1812	13.25	Bacteria	Proteobacteria	Deltaproteobacteria	Myxococcales	Nannocystaceae	Pseudenhygromyxa	Pseudenhygromyxa_salsuginis
ugt74f2	OTU_5991	17	Bacteria	Proteobacteria	Betaproteobacteria	Rhodocyclales	Rhodocyclaceae	Azoarcus	Azoarcus_toluclasticus
ugt74f2	OTU_2710	12.5833	Bacteria	Actinobacteria	Actinobacteria	Actinomycetales	Cellulomonadaceae	Cellulomonas	Cellulomonas_fimi
ugt74f2	OTU_2159	11.1667	Bacteria	Bacteroidetes	Cytophagia	Cytophagales	Unassigned	Chryseolinea	Chryseolinea_serpens
ugt74f2	OTU_2543	34	Bacteria	Actinobacteria	Actinobacteria	Actinomycetales	Streptomycetaceae	Streptomyces	Streptomyces_blastmyceticus
ugt74f2	OTU_1131	108.333	Bacteria	Proteobacteria	Betaproteobacteria	Burkholderiales	Burkholderiaceae	Paucimonas	Paucimonas_lemoignei
ugt74f2	OTU_444	294.583	Bacteria	Proteobacteria	Alphaproteobacteria	Rhizobiales	Rhizobiaceae	Shinella	Shinella_zoogloeoides
ugt74f2	OTU_1896	17.8333	Bacteria	Parcubacteria	Alphaproteobacteria	Campylobacterales	Methylobacteriaceae	Parcubacteria_genera_incertae_sedis	Rickettsia_canadensis
ugt74f2	OTU_3988	8.66667	Bacteria	Proteobacteria	Deltaproteobacteria	Bdellovibrionales	Bacteriovoracaceae	Peredibacter	Peredibacter_starrii
ugt74f2	OTU_1358	100.25	Bacteria	Actinobacteria	Actinobacteria	Actinomycetales	Pseudonocardiaceae	Actinophytocola	Actinophytocola_corallina
ugt74f2	OTU_3481	13.75	Bacteria	Proteobacteria	Deltaproteobacteria	Myxococcales	Geobacteraceae	Geobacter	Sandaracinus_amylolyticus
ugt74f2	OTU_1367	24.6667	Bacteria	Proteobacteria	Gammaproteobacteria	Xanthomonadales	Sinobacteraceae	Steroidobacter	Steroidobacter_agariperforans
ugt74f2	OTU_543	209.167	Bacteria	Proteobacteria	Deltaproteobacteria	Myxococcales	Phaselicystidaceae	Phaselicystis	Phaselicystis_flava
ugt74f2	OTU_1727	26.9167	Bacteria	Chloroflexi	Chloroflexia	Herpetosiphonales	Herpetosiphonaceae	Herpetosiphon	Cystobacter_badius
ugt74f2	OTU_3600	15.0833	Bacteria	Proteobacteria	Alphaproteobacteria	Sphingomonadales	Sphingomonadaceae	Novosphingobium	Novosphingobium_hassiacum
ugt74f2	OTU_4149	11.5833	Bacteria	Proteobacteria	Gammaproteobacteria	Xanthomonadales	Xanthomonadaceae	Rehaibacterium	Rehaibacterium_terrae
ugt74f2	OTU_2833	9.5	Bacteria	Proteobacteria	Betaproteobacteria	Burkholderiales	Oxalobacteraceae	Massilia	Massilia_kyonggiensis
ugt74f2	OTU_2579	8.58333	Bacteria	Proteobacteria	Alphaproteobacteria	Rhizobiales	Beijerinckiaceae	Microvirga	Microvirga_lupini
ugt74f2	OTU_5009	10.3333	Bacteria	Bacteroidetes	Sphingobacteriia	Sphingobacteriales	Sphingobacteriaceae	Sphingobacterium	Sphingobacterium_pakistanense
ugt74f2	OTU_578	127.667	Bacteria	Proteobacteria	Alphaproteobacteria	Rhizobiales	Rhizobiaceae	Rhizobium	Rhizobium_soli
ugt74f2	OTU_1057	42.3333	Bacteria	Actinobacteria	Actinobacteria	Actinomycetales	Streptomycetaceae	Streptomyces	Streptomyces_seranimatus
ugt74f2	OTU_425	193.917	Bacteria	Proteobacteria	Gammaproteobacteria	Chromatiales	Chromatiaceae	Rheinheimera	Rheinheimera_baltica
ugt74f2	OTU_1599	28.8333	Bacteria	Proteobacteria	Alphaproteobacteria	Caulobacterales	Caulobacteraceae	Brevundimonas	Brevundimonas_nasdae
ugt74f2	OTU_3547	7	Bacteria	Proteobacteria	Clostridia	Clostridiales	Clostridiaceae_1	Clostridium_sensu_stricto	Desulfocella_halophila
ugt74f2	OTU_3740	6.41667	Bacteria	Firmicutes	Bacilli	Bacillales	Paenibacillaceae_1	Paenibacillus	Paenibacillus_ehimensis
ugt74f2	OTU_1471	31.25	Bacteria	Actinobacteria	Actinobacteria	Actinomycetales	Micromonosporaceae	Phytohabitans	Phytohabitans_houttuyneae
ugt74f2	OTU_1879	17.4167	Bacteria	Proteobacteria	Deltaproteobacteria	Myxococcales	Myxococcaceae	Pyxidicoccus	Pyxidicoccus_fallax
ugt74f2	OTU_1796	26.4167	Bacteria	Proteobacteria	Betaproteobacteria	Burkholderiales	Comamonadaceae	Kinneretia	Kinneretia_asaccharophila
ugt74f2	OTU_1822	9.66667	Bacteria	Proteobacteria	Gammaproteobacteria	Xanthomonadales	Sinobacteraceae	Salinisphaera	Alkanibacter_difficilis
ugt74f2	OTU_4593	25	Bacteria	Bacteroidetes	Sphingobacteriia	Sphingobacteriales	Sphingobacteriaceae	Sphingobacterium	Sphingobacterium_canadense
ugt74f2	OTU_1657	20.5833	Bacteria	Proteobacteria	Alphaproteobacteria	Rhizobiales	Bradyrhizobiaceae	Bosea	Bosea_thiooxidans
ugt74f2	OTU_5944	8.41667	Bacteria	Firmicutes	Bacilli	Bacillales	Bacillaceae_1	Bacillus	Bacillus_cecembensis
ugt74f2	OTU_4531	14.1667	Bacteria	Proteobacteria	Betaproteobacteria	Rhodocyclales	Rhodocyclaceae	Dechloromonas	Dechloromonas_hortensis
ugt74f2	OTU_6361	12.75	Bacteria	Proteobacteria	Alphaproteobacteria	Caulobacterales	Caulobacteraceae	Brevundimonas	Brevundimonas_bacteroides
ugt74f2	OTU_6415	10.0833	Bacteria	Proteobacteria	Deltaproteobacteria	Myxococcales	Polyangiaceae	Labilithrix	Labilithrix_luteola
ugt74f2	OTU_2278	12.3333	Bacteria	Actinobacteria	Actinobacteria	Actinomycetales	Streptosporangiaceae	Nonomuraea	Nonomuraea_rhizophila
ugt74f2	OTU_4968	8.33333	Bacteria	Actinobacteria	Actinobacteria	Actinomycetales	Nocardioidaceae	Nocardioides	Nocardioides_caricicola
ugt74f2	OTU_3471	9.66667	Bacteria	Proteobacteria	Gammaproteobacteria	Xanthomonadales	Sinobacteraceae	Povalibacter	Povalibacter_uvarum
ugt74f2	OTU_3464	6	Bacteria	Bacteroidetes	Flavobacteriia	Flavobacteriales	Flavobacteriaceae	Flavobacterium	Flavobacterium_suzhouense
ugt74f2	OTU_751	225.75	Bacteria	Proteobacteria	Betaproteobacteria	Burkholderiales	Comamonadaceae	Acidovorax	Acidovorax_avenae
ugt74f2	OTU_3565	14.5833	Bacteria	Proteobacteria	Deltaproteobacteria	Myxococcales	Polyangiaceae	Polyangium	Polyangium_fumosum
ugt74f2	OTU_2949	7.08333	Bacteria	Planctomycetes	Planctomycetia	Planctomycetales	Planctomycetaceae	Pirellula	Pirellula_staleyi
ugt74f2	OTU_2139	32.1667	Bacteria	Proteobacteria	Betaproteobacteria	Methylophilales	Methylophilaceae	Methylophilus	Methylophilus_rhizosphaerae
ugt74f2	OTU_4277	23.1667	Bacteria	Proteobacteria	Alphaproteobacteria	Sphingomonadales	Sphingomonadaceae	Sphingomonas	Unassigned
ugt74f2	OTU_2545	39.1667	Bacteria	Proteobacteria	Alphaproteobacteria	Rhizobiales	Rhizobiaceae	Rhizobium	Rhizobium_larrymoorei
ugt74f2	OTU_4184	23.1667	Bacteria	Proteobacteria	Betaproteobacteria	Rhodocyclales	Rhodocyclaceae	Dechloromonas	Dechloromonas_hortensis
ugt74f2	OTU_2870	6.41667	Bacteria	Proteobacteria	Betaproteobacteria	Burkholderiales	Alcaligenaceae	Achromobacter	Achromobacter_spanius
ugt74f2	OTU_818	183.75	Bacteria	Proteobacteria	Alphaproteobacteria	Sphingomonadales	Sphingomonadaceae	Sphingobium	Sphingobium_limneticum
ugt74f2	OTU_3260	23.4167	Bacteria	Bacteroidetes	Flavobacteriia	Flavobacteriales	Flavobacteriaceae	Chryseobacterium	Chryseobacterium_geocarposphaerae
ugt74f2	OTU_1905	38.5833	Bacteria	Bacteroidetes	Flavobacteriia	Flavobacteriales	Flavobacteriaceae	Flavobacterium	Flavobacterium_suncheonense
ugt74f2	OTU_3302	70.6667	Bacteria	Firmicutes	Bacilli	Bacillales	Paenibacillaceae_1	Paenibacillus	Paenibacillus_contaminans
ugt74f2	OTU_4369	14.8333	Bacteria	Bacteroidetes	Sphingobacteriia	Sphingobacteriales	Sphingobacteriaceae	Sphingobacterium	Sphingobacterium_canadense
ugt74f2	OTU_3123	51.0833	Bacteria	Proteobacteria	Alphaproteobacteria	Sphingomonadales	Sphingomonadaceae	Sphingobium	Sphingobium_amiense
ugt74f2	OTU_993	306.333	Bacteria	Proteobacteria	Gammaproteobacteria	Xanthomonadales	Xanthomonadaceae	Vulcaniibacterium	Vulcaniibacterium_thermophilum
ugt74f2	OTU_3515	37	Bacteria	Bacteroidetes	Flavobacteriia	Flavobacteriales	Flavobacteriaceae	Chryseobacterium	Chryseobacterium_vrystaatense
ugt74f2	OTU_3974	7.83333	Bacteria	Actinobacteria	Actinobacteria	Actinomycetales	Micromonosporaceae	Rhizocola	Rhizocola_hellebori
ugt74f2	OTU_3201	17.75	Bacteria	Proteobacteria	Deltaproteobacteria	Myxococcales	Myxococcaceae	Pyxidicoccus	Pyxidicoccus_fallax
ugt74f2	OTU_4905	13.75	Bacteria	Bacteroidetes	Sphingobacteriia	Sphingobacteriales	Sphingobacteriaceae	Sphingobacterium	Sphingobacterium_canadense
ugt74f2	OTU_3752	6	Bacteria	Proteobacteria	Alphaproteobacteria	Rhizobiales	Hyphomicrobiaceae	Devosia	Devosia_neptuniae
ugt74f2	OTU_2426	12.9167	Bacteria	Proteobacteria	Alphaproteobacteria	Caulobacterales	Caulobacteraceae	Caulobacter	Caulobacter_henricii
ugt74f2	OTU_2923	13.0833	Bacteria	Proteobacteria	Betaproteobacteria	Rhodocyclales	Rhodocyclaceae	Georgfuchsia	Georgfuchsia_toluolica
ugt74f2	OTU_1472	111.667	Bacteria	Bacteroidetes	Flavobacteriia	Flavobacteriales	Flavobacteriaceae	Chryseobacterium	Chryseobacterium_wanjuense
ugt74f2	OTU_1180	146.833	Bacteria	Bacteroidetes	Flavobacteriia	Flavobacteriales	Flavobacteriaceae	Flavobacterium	Flavobacterium_compostarboris
ugt74f2	OTU_3794	14.5833	Bacteria	Proteobacteria	Alphaproteobacteria	Rhizobiales	Hyphomicrobiaceae	Devosia	Devosia_soli
ugt74f2	OTU_5108	78	Bacteria	Firmicutes	Bacilli	Bacillales	Paenibacillaceae_1	Paenibacillus	Paenibacillus_harenae
ugt74f2	OTU_3571	43.75	Bacteria	Firmicutes	Bacilli	Bacillales	Paenibacillaceae_1	Paenibacillus	Paenibacillus_contaminans
ugt74f2ugt76c4	OTU_3069	75.25	Bacteria	Chloroflexi	Chloroflexia	Chloroflexales	Chloroflexaceae	Roseiflexus	Roseiflexus_castenholzii
ugt74f2ugt76c4	OTU_12	19584.1	Bacteria	Proteobacteria	Gammaproteobacteria	Pseudomonadales	Pseudomonadaceae	Cellvibrio	Cellvibrio_vulgaris
ugt74f2ugt76c4	OTU_263	236.083	Bacteria	Proteobacteria	Deltaproteobacteria	Myxococcales	Sandaracinaceae	Sandaracinus	Sandaracinus_amylolyticus
ugt74f2ugt76c4	OTU_289	190.5	Bacteria	Actinobacteria	Actinobacteria	Actinomycetales	Microbacteriaceae	Yonghaparkia	Yonghaparkia_alkaliphila
ugt74f2ugt76c4	OTU_892	60.6667	Bacteria	Planctomycetes	Planctomycetia	Planctomycetales	Planctomycetaceae	Rhodopirellula	Rhodopirellula_rubra
ugt74f2ugt76c4	OTU_2901	27.8333	Bacteria	Proteobacteria	Betaproteobacteria	Burkholderiales	Oxalobacteraceae	Massilia	Massilia_albidiflava
ugt74f2ugt76c4	OTU_329	155	Bacteria	Proteobacteria	Deltaproteobacteria	Myxococcales	Nannocystaceae	Nannocystis	Nannocystis_exedens
ugt74f2ugt76c4	OTU_57	2011.17	Bacteria	Proteobacteria	Gammaproteobacteria	Xanthomonadales	Xanthomonadaceae	Pseudoxanthomonas	Pseudoxanthomonas_mexicana
ugt74f2ugt76c4	OTU_208	242.583	Bacteria	Proteobacteria	Deltaproteobacteria	Myxococcales	Haliangiaceae	Haliangium	Haliangium_tepidum
ugt74f2ugt76c4	OTU_2248	7.16667	Bacteria	Proteobacteria	Alphaproteobacteria	Rhodospirillales	Rhodospirillaceae	Thalassobaculum	Thalassobaculum_litoreum
ugt74f2ugt76c4	OTU_308	316.25	Bacteria	Proteobacteria	Alphaproteobacteria	Sphingomonadales	Sphingomonadaceae	Sphingomonas	Sphingomonas_indica
ugt74f2ugt76c4	OTU_268	180	Bacteria	Proteobacteria	Deltaproteobacteria	Myxococcales	Haliangiaceae	Haliangium	Haliangium_tepidum
ugt74f2ugt76c4	OTU_535	69.4167	Bacteria	Proteobacteria	Alphaproteobacteria	Rhizobiales	Rhizobiaceae	Shinella	Rhizobium_alvei
ugt74f2ugt76c4	OTU_228	223	Bacteria	Chloroflexi	Chloroflexia	Chloroflexales	Chloroflexaceae	Roseiflexus	Roseiflexus_castenholzii
ugt74f2ugt76c4	OTU_2907	15.4167	Bacteria	Chloroflexi	Chloroflexia	Chloroflexales	Chloroflexaceae	Roseiflexus	Roseiflexus_castenholzii
ugt74f2ugt76c4	OTU_455	70.0833	Bacteria	Proteobacteria	Deltaproteobacteria	Myxococcales	Desulfobacteraceae	Desulfatiglans	Desulfatiglans_parachlorophenolica
ugt74f2ugt76c4	OTU_1795	12.9167	Bacteria	Proteobacteria	Gammaproteobacteria	Xanthomonadales	Sinobacteraceae	Steroidobacter	Steroidobacter_denitrificans
ugt74f2ugt76c4	OTU_1356	124.083	Bacteria	Bacteroidetes	Cytophagia	Cytophagales	Unassigned	Chryseolinea	Chryseolinea_serpens
ugt74f2ugt76c4	OTU_452	97.9167	Bacteria	Proteobacteria	Alphaproteobacteria	Rhizobiales	Methylocystaceae	Albibacter	Albibacter_methylovorans
ugt74f2ugt76c4	OTU_518	80.3333	Bacteria	Actinobacteria	Actinobacteria	Actinomycetales	Microbacteriaceae	Microbacterium	Microbacterium_kitamiense
ugt74f2ugt76c4	OTU_412	164.833	Bacteria	Planctomycetes	Planctomycetia	Planctomycetales	Planctomycetaceae	Thermogutta	Thermogutta_hypogea
ugt74f2ugt76c4	OTU_1153	22.4167	Bacteria	Chloroflexi	Chloroflexia	Chloroflexales	Chloroflexaceae	Roseiflexus	Roseiflexus_castenholzii
ugt74f2ugt76c4	OTU_1641	13.6667	Bacteria	Proteobacteria	Alphaproteobacteria	Rhizobiales	Hyphomicrobiaceae	Rhodoplanes	Rhodoplanes_roseus
ugt74f2ugt76c4	OTU_597	69.9167	Bacteria	Proteobacteria	Alphaproteobacteria	Caulobacterales	Caulobacteraceae	Brevundimonas	Brevundimonas_kwangchunensis
ugt74f2ugt76c4	OTU_2084	10.5	Bacteria	Proteobacteria	Betaproteobacteria	Burkholderiales	Comamonadaceae	Ramlibacter	Limnohabitans_planktonicus
ugt74f2ugt76c4	OTU_1997	14.4167	Bacteria	Actinobacteria	Actinobacteria	Actinomycetales	Pseudonocardiaceae	Aciditerrimonas	Aciditerrimonas_ferrireducens
ugt74f2ugt76c4	OTU_1835	11.8333	Bacteria	Chloroflexi	Chloroflexia	Herpetosiphonales	Herpetosiphonaceae	Herpetosiphon	Roseiflexus_castenholzii
ugt74f2ugt76c4	OTU_598	72.5	Bacteria	Proteobacteria	Gammaproteobacteria	Legionellales	Coxiellaceae	Diplorickettsia	Diplorickettsia_massiliensis
ugt74f2ugt76c4	OTU_1622	51.8333	Bacteria	Proteobacteria	Alphaproteobacteria	Rhizobiales	Rhizobiaceae	Rhizobium	Rhizobium_soli
ugt74f2ugt76c4	OTU_485	151.833	Bacteria	Actinobacteria	Actinobacteria	Actinomycetales	Thermomonosporaceae	Actinocorallia	Actinocorallia_herbida
ugt74f2ugt76c4	OTU_844	33.8333	Bacteria	Actinobacteria	Actinobacteria	Actinomycetales	Intrasporangiaceae	Tetrasphaera	Tetrasphaera_duodecadis
ugt74f2ugt76c4	OTU_4356	11.8333	Bacteria	Verrucomicrobia	Spartobacteria	Verrucomicrobiales	Verrucomicrobiaceae	Spartobacteria_genera_incertae_sedis	Roseibacillus_ishigakijimensis
ugt74f2ugt76c4	OTU_194	614.583	Bacteria	Proteobacteria	Gammaproteobacteria	Xanthomonadales	Xanthomonadaceae	Lysobacter	Lysobacter_gummosus
ugt74f2ugt76c4	OTU_3011	12.1667	Bacteria	Actinobacteria	Actinobacteria	Actinomycetales	Kineosporiaceae	Kineosporia	Kineosporia_rhizophila
ugt74f2ugt76c4	OTU_1103	58.5833	Bacteria	Actinobacteria	Actinobacteria	Actinomycetales	Micromonosporaceae	Actinoplanes	Actinoplanes_friuliensis
ugt74f2ugt76c4	OTU_4165	21.4167	Bacteria	Proteobacteria	Alphaproteobacteria	Caulobacterales	Caulobacteraceae	Brevundimonas	Brevundimonas_faecalis
ugt74f2ugt76c4	OTU_2009	26.8333	Bacteria	Proteobacteria	Alphaproteobacteria	Rhizobiales	Bradyrhizobiaceae	Bosea	Bosea_thiooxidans
ugt74f2ugt76c4	OTU_320	463.25	Bacteria	Proteobacteria	Gammaproteobacteria	Pseudomonadales	Pseudomonadaceae	Pseudomonas	Pseudomonas_guariconensis
ugt74f2ugt76c4	OTU_663	246.583	Bacteria	Proteobacteria	Betaproteobacteria	Burkholderiales	Oxalobacteraceae	Massilia	Massilia_kyonggiensis
ugt74f2ugt76c4	OTU_1487	16.9167	Bacteria	Proteobacteria	Deltaproteobacteria	Myxococcales	Haliangiaceae	Haliangium	Haliangium_tepidum
ugt74f2ugt76c4	OTU_806	47.25	Bacteria	Proteobacteria	Deltaproteobacteria	Myxococcales	Sandaracinaceae	Sandaracinus	Sandaracinus_amylolyticus
ugt74f2ugt76c4	OTU_687	55	Bacteria	Proteobacteria	Alphaproteobacteria	Rhizobiales	Methylobacteriaceae	Microvirga	Chelativorans_intermedius
ugt74f2ugt76c4	OTU_399	146.75	Bacteria	Proteobacteria	Gammaproteobacteria	Xanthomonadales	Xanthomonadaceae	Pseudoxanthomonas	Pseudoxanthomonas_koreensis
ugt74f2ugt76c4	OTU_2222	7.91667	Bacteria	Chloroflexi	Chloroflexia	Chloroflexales	Chloroflexaceae	Roseiflexus	Roseiflexus_castenholzii
ugt74f2ugt76c4	OTU_2714	12.5	Bacteria	Chloroflexi	Chloroflexia	Chloroflexales	Chloroflexaceae	Roseiflexus	Roseiflexus_castenholzii
ugt74f2ugt76c4	OTU_411	137.833	Bacteria	Proteobacteria	Alphaproteobacteria	Sneathiellales	Sneathiellaceae	Ferrovibrio	Ferrovibrio_denitrificans
ugt74f2ugt76c4	OTU_870	69.25	Bacteria	Proteobacteria	Deltaproteobacteria	Myxococcales	Polyangiaceae	Polyangium	Polyangium_fumosum
ugt74f2ugt76c4	OTU_2361	26.8333	Bacteria	Proteobacteria	Alphaproteobacteria	Rhizobiales	Rhizobiaceae	Rhizobium	Rhizobium_tibeticum
ugt74f2ugt76c4	OTU_362	339.75	Bacteria	Proteobacteria	Alphaproteobacteria	Sphingomonadales	Sphingomonadaceae	Sphingomonas	Sphingomonas_pseudosanguinis
ugt74f2ugt76c4	OTU_1603	17.25	Bacteria	Actinobacteria	Actinobacteria	Actinomycetales	Nocardioidaceae	Marmoricola	Marmoricola_korecus
ugt74f2ugt76c4	OTU_593	57.25	Bacteria	Proteobacteria	Alphaproteobacteria	Rhizobiales	Rhizobiaceae	Rhizobium	Rhizobium_subbaraonis
ugt74f2ugt76c4	OTU_3436	18.6667	Bacteria	Bacteroidetes	Cytophagia	Cytophagales	Cytophagaceae	Ohtaekwangia	Ohtaekwangia_kribbensis
ugt74f2ugt76c4	OTU_2029	16.75	Bacteria	Actinobacteria	Actinobacteria	Actinomycetales	Pseudonocardiaceae	Actinokineospora	Actinokineospora_soli
ugt74f2ugt76c4	OTU_1059	45.75	Bacteria	Proteobacteria	Alphaproteobacteria	Rhizobiales	Methylocystaceae	Methylobacterium	Methylobacterium_isbiliense
ugt74f2ugt76c4	OTU_2435	11.6667	Bacteria	Bacteroidetes	Flavobacteriia	Flavobacteriales	Cryomorphaceae	Phaeocystidibacter	Phaeocystidibacter_luteus
ugt74f2ugt76c4	OTU_1567	11.9167	Bacteria	Proteobacteria	Alphaproteobacteria	Rhodobacterales	Rhodobacteraceae	Rhodobacter	Rhodobacter_blasticus
ugt74f2ugt76c4	OTU_996	26.5833	Bacteria	Actinobacteria	Actinobacteria	Acidimicrobiales	Acidimicrobiaceae	Ilumatobacter	Ilumatobacter_fluminis
ugt74f2ugt76c4	OTU_1412	56.3333	Bacteria	Bacteroidetes	Cytophagia	Cytophagales	Cytophagaceae	Ohtaekwangia	Ohtaekwangia_koreensis
ugt74f2ugt76c4	OTU_1455	40.3333	Bacteria	Chloroflexi	Chloroflexia	Chloroflexales	Chloroflexaceae	Roseiflexus	Roseiflexus_castenholzii
ugt74f2ugt76c4	OTU_779	60.25	Bacteria	Chloroflexi	Chloroflexia	Chloroflexales	Chloroflexaceae	Roseiflexus	Roseiflexus_castenholzii
ugt74f2ugt76c4	OTU_1120	26.8333	Bacteria	Proteobacteria	Deltaproteobacteria	Myxococcales	Nannocystaceae	Nannocystis	Nannocystis_exedens
ugt74f2ugt76c4	OTU_560	77.5	Bacteria	Proteobacteria	Deltaproteobacteria	Myxococcales	Haliangiaceae	Haliangium	Haliangium_tepidum
ugt74f2ugt76c4	OTU_1186	23	Bacteria	Proteobacteria	Alphaproteobacteria	Rhizobiales	Hyphomicrobiaceae	Devosia	Devosia_submarina
ugt74f2ugt76c4	OTU_1251	39.75	Bacteria	Chloroflexi	Chloroflexia	Chloroflexales	Chloroflexaceae	Herpetosiphon	Kallotenue_papyrolyticum
ugt74f2ugt76c4	OTU_2258	8.66667	Bacteria	Actinobacteria	Actinobacteria	Actinomycetales	Iamiaceae	Aquihabitans	Aquihabitans_daechungensis
ugt74f2ugt76c4	OTU_1240	47.5	Bacteria	Cyanobacteria	Cyanobacteria	Unassigned	Family_I	GpI	Prochlorothrix_hollandica
ugt74f2ugt76c4	OTU_1077	22.75	Bacteria	Actinobacteria	Actinobacteria	Actinomycetales	Acidimicrobineae_incertae_sedis	Aciditerrimonas	Aciditerrimonas_ferrireducens
ugt74f2ugt76c4	OTU_961	36.25	Bacteria	Proteobacteria	Alphaproteobacteria	Sphingomonadales	Erythrobacteraceae	Altererythrobacter	Altererythrobacter_troitsensis
ugt74f2ugt76c4	OTU_824	69.3333	Bacteria	Cyanobacteria	Cyanobacteria	Unassigned	Family_I	GpI	Prochlorothrix_hollandica
ugt74f2ugt76c4	OTU_1913	11.5	Bacteria	Proteobacteria	Alphaproteobacteria	Rhizobiales	Phyllobacteriaceae	Hoeflea	Hoeflea_marina
ugt74f2ugt76c4	OTU_5030	15.25	Bacteria	Proteobacteria	Gammaproteobacteria	Xanthomonadales	Xanthomonadaceae	Mizugakiibacter	Mizugakiibacter_sediminis
ugt74f2ugt76c4	OTU_2318	71.9167	Bacteria	Proteobacteria	Betaproteobacteria	Burkholderiales	Oxalobacteraceae	Massilia	Duganella_phyllosphaerae
ugt74f2ugt76c4	OTU_1821	22.3333	Bacteria	Proteobacteria	Alphaproteobacteria	Rhizobiales	Rhizobiaceae	Rhizobium	Rhizobium_tarimense
ugt74f2ugt76c4	OTU_1243	20.5833	Bacteria	Proteobacteria	Alphaproteobacteria	Sneathiellales	Sneathiellaceae	Ferrovibrio	Ferrovibrio_denitrificans
ugt74f2ugt76c4	OTU_1345	21.8333	Bacteria	Proteobacteria	Alphaproteobacteria	Rhizobiales	Hyphomicrobiaceae	Variibacter	Variibacter_gotjawalensis
ugt74f2ugt76c4	OTU_2790	8.66667	Bacteria	Planctomycetes	Planctomycetia	Planctomycetales	Planctomycetaceae	Pirellula	Pirellula_staleyi
ugt74f2ugt76c4	OTU_1159	21.5	Bacteria	Actinobacteria	Actinobacteria	Actinomycetales	Intrasporangiaceae	Lapillicoccus	Lapillicoccus_jejuensis
ugt74f2ugt76c4	OTU_1549	16.9167	Bacteria	Proteobacteria	Alphaproteobacteria	Rhodospirillales	Rhodospirillaceae	Ferrovibrio	Ferrovibrio_denitrificans
ugt74f2ugt76c4	OTU_1644	26.5	Bacteria	Proteobacteria	Alphaproteobacteria	Sphingomonadales	Erythrobacteraceae	Altererythrobacter	Altererythrobacter_troitsensis
ugt74f2ugt76c4	OTU_1993	12.6667	Bacteria	Proteobacteria	Deltaproteobacteria	Myxococcales	Cystobacteraceae	Archangium	Archangium_gephyra
ugt74f2ugt76c4	OTU_521	174.167	Bacteria	Bacteroidetes	Flavobacteriia	Flavobacteriales	Flavobacteriaceae	Flavobacterium	Flavobacterium_nitratireducens
ugt74f2ugt76c4	OTU_1608	21.0833	Bacteria	Proteobacteria	Alphaproteobacteria	Caulobacterales	Hyphomonadaceae	Hirschia	Hirschia_litorea
ugt74f2ugt76c4	OTU_1550	15.5	Bacteria	Proteobacteria	Deltaproteobacteria	Myxococcales	Myxococcaceae	Aggregicoccus	Aggregicoccus_edonensis
ugt74f2ugt76c4	OTU_1841	14.1667	Bacteria	Chlamydiae	Chlamydiia	Chlamydiales	Chlamydiaceae	Chlamydia	Chlamydophila_psittaci
ugt74f2ugt76c4	OTU_3046	11.5	Bacteria	Bacteroidetes	Flavobacteriia	Flavobacteriales	Flavobacteriaceae	Flavobacterium	Flavobacterium_hauense
ugt74f2ugt76c4	OTU_5253	8.58333	Bacteria	Firmicutes	Bacilli	Bacillales	Paenibacillaceae_1	Paenibacillus	Paenibacillus_pocheonensis
ugt74f2ugt76c4	OTU_1094	41.5833	Bacteria	Proteobacteria	Alphaproteobacteria	Caulobacterales	Caulobacteraceae	Brevundimonas	Brevundimonas_aveniformis
ugt74f2ugt76c4	OTU_2638	7.75	Bacteria	Proteobacteria	Alphaproteobacteria	Sphingomonadales	Erythrobacteraceae	Altererythrobacter	Altererythrobacter_atlanticus
ugt74f2ugt76c4	OTU_5601	12.3333	Bacteria	Firmicutes	Bacilli	Bacillales	Paenibacillaceae_1	Paenibacillus	Paenibacillus_panacisoli
ugt74f2ugt76c4	OTU_1778	13.3333	Bacteria	Actinobacteria	Actinobacteria	Actinomycetales	Microbacteriaceae	Microbacterium	Microbacterium_kitamiense
ugt74f2ugt76c4	OTU_2586	14.75	Bacteria	Actinobacteria	Actinobacteria	Actinomycetales	Acidimicrobineae_incertae_sedis	Aciditerrimonas	Aciditerrimonas_ferrireducens
ugt74f2ugt76c4	OTU_1968	17.4167	Bacteria	Chloroflexi	Ardenticatenia	Ardenticatenales	Ardenticatenaceae	Ardenticatena	Ardenticatena_maritima
ugt74f2ugt76c4	OTU_2844	21.25	Bacteria	Proteobacteria	Alphaproteobacteria	Sphingomonadales	Sphingomonadaceae	Novosphingobium	Novosphingobium_subterraneum
ugt74f2ugt76c4	OTU_1689	29.25	Bacteria	Proteobacteria	Alphaproteobacteria	Sphingomonadales	Sphingomonadaceae	Sphingobium	Sphingobium_faniae
ugt74f2ugt76c4	OTU_2062	12.25	Bacteria	Proteobacteria	Alphaproteobacteria	Rhodospirillales	Rhodospirillaceae	Dongia	Dongia_rigui
ugt74f2ugt76c4	OTU_1311	44.0833	Bacteria	Verrucomicrobia	Subdivision3	Verrucomicrobiales	Verrucomicrobiaceae	Subdivision3_genera_incertae_sedis	Prosthecobacter_dejongeii
ugt74f2ugt76c4	OTU_2125	10.9167	Bacteria	Actinobacteria	Actinobacteria	Actinomycetales	Micromonosporaceae	Micromonospora	Micromonospora_chalcea
ugt74f2ugt76c4	OTU_842	132.167	Bacteria	Proteobacteria	Alphaproteobacteria	Rhizobiales	Rhizobiaceae	Rhizobium	Rhizobium_radiobacter
ugt74f2ugt76c4	OTU_1205	39.0833	Bacteria	Proteobacteria	Deltaproteobacteria	Bdellovibrionales	Bdellovibrionaceae	Bdellovibrio	Bdellovibrio_bacteriovorus
ugt74f2ugt76c4	OTU_1407	17.6667	Bacteria	Proteobacteria	Alphaproteobacteria	Rhizobiales	Hyphomicrobiaceae	Hyphomicrobium	Hyphomicrobium_zavarzinii
ugt74f2ugt76c4	OTU_1614	16.9167	Bacteria	Proteobacteria	Alphaproteobacteria	Rhizobiales	Methylocystaceae	Albibacter	Albibacter_methylovorans
ugt74f2ugt76c4	OTU_2341	7.16667	Bacteria	Proteobacteria	Deltaproteobacteria	Desulfuromonadales	Desulfuromonadaceae	Pelobacter	Pelobacter_seleniigenes
ugt74f2ugt76c4	OTU_536	123.667	Bacteria	Proteobacteria	Alphaproteobacteria	Caulobacterales	Caulobacteraceae	Brevundimonas	Brevundimonas_faecalis
ugt74f2ugt76c4	OTU_2584	9.41667	Bacteria	Proteobacteria	Alphaproteobacteria	Rhizobiales	Hyphomicrobiaceae	Devosia	Devosia_submarina
ugt74f2ugt76c4	OTU_2449	9.41667	Bacteria	Proteobacteria	Deltaproteobacteria	Myxococcales	Labilitrichaceae	Labilithrix	Labilithrix_luteola
ugt74f2ugt76c4	OTU_1100	68.75	Bacteria	Proteobacteria	Alphaproteobacteria	Rhizobiales	Bradyrhizobiaceae	Bosea	Bosea_massiliensis
ugt74f2ugt76c4	OTU_728	65.3333	Bacteria	Proteobacteria	Deltaproteobacteria	Desulfuromonadales	Geobacteraceae	Geobacter	Bdellovibrio_bacteriovorus
ugt74f2ugt76c4	OTU_2042	11.1667	Bacteria	Proteobacteria	Gammaproteobacteria	Legionellales	Legionellaceae	Legionella	Diplorickettsia_massiliensis
ugt74f2ugt76c4	OTU_2456	8.58333	Bacteria	Proteobacteria	Alphaproteobacteria	Rhizobiales	Hyphomicrobiaceae	Devosia	Devosia_riboflavina
ugt74f2ugt76c4	OTU_1328	35.4167	Bacteria	Chloroflexi	Chloroflexia	Rhizobiales	Herpetosiphonaceae	Herpetosiphon	Roseiflexus_castenholzii
ugt74f2ugt76c4	OTU_2589	11.3333	Bacteria	Proteobacteria	Alphaproteobacteria	Sneathiellales	Sneathiellaceae	Ferrovibrio	Ferrovibrio_denitrificans
ugt74f2ugt76c4	OTU_2241	12	Bacteria	Proteobacteria	Alphaproteobacteria	Rhizobiales	Rhizobiaceae	Rhizobium	Rhizobium_fabae
ugt74f2ugt76c4	OTU_4822	8	Bacteria	Firmicutes	Bacilli	Bacillales	Paenibacillaceae_1	Paenibacillus	Paenibacillus_panacisoli
ugt74f2ugt76c4	OTU_2041	12.75	Bacteria	Proteobacteria	Alphaproteobacteria	Rhizobiales	Rhodobiaceae	Afifella	Afifella_pfennigii
ugt74f2ugt76c4	OTU_3220	8	Bacteria	Actinobacteria	Actinobacteria	Actinomycetales	Streptomycetaceae	Streptomyces	Streptomyces_harbinensis
ugt74f2ugt76c4	OTU_2810	11.5833	Bacteria	Bacteroidetes	Sphingobacteriia	Sphingobacteriales	Chitinophagaceae	Chitinophaga	Chitinophaga_filiformis
ugt74f2ugt76c4	OTU_1987	21.6667	Bacteria	Chloroflexi	Chloroflexia	Chloroflexales	Herpetosiphonaceae	Herpetosiphon	Roseiflexus_castenholzii
ugt74f2ugt76c4	OTU_2186	11	Bacteria	Proteobacteria	Alphaproteobacteria	Rhizobiales	Phyllobacteriaceae	Kaistia	Microvirga_aerophila
ugt74f2ugt76c4	OTU_2458	7.91667	Bacteria	Proteobacteria	Gammaproteobacteria	Xanthomonadales	Sinobacteraceae	Ectothiorhodospira	Steroidobacter_agariperforans
ugt74f2ugt76c4	OTU_1711	11.8333	Bacteria	Proteobacteria	Alphaproteobacteria	Sphingomonadales	Sphingomonadaceae	Sphingomonas	Sphingomonas_sediminicola
ugt74f2ugt76c4	OTU_1551	23.6667	Bacteria	Proteobacteria	Deltaproteobacteria	Myxococcales	Phaselicystidaceae	Phaselicystis	Phaselicystis_flava
ugt74f2ugt76c4	OTU_4012	14	Bacteria	Firmicutes	Bacilli	Bacillales	Paenibacillaceae_1	Paenibacillus	Paenibacillus_panacisoli
ugt74f2ugt76c4	OTU_3128	7.75	Bacteria	Verrucomicrobia	Verrucomicrobiae	Verrucomicrobiales	Verrucomicrobiaceae	Luteolibacter	Luteolibacter_cuticulihirudinis
ugt74f2ugt76c4	OTU_2627	7.91667	Bacteria	Bacteroidetes	Flavobacteriia	Flavobacteriales	Flavobacteriaceae	Flavobacterium	Flavobacterium_subsaxonicum
ugt74f2ugt76c4	OTU_729	66.9167	Bacteria	Proteobacteria	Gammaproteobacteria	Legionellales	Coxiellaceae	Aquicella	Aquicella_lusitana
ugt74f2ugt76c4	OTU_3734	13.9167	Bacteria	Proteobacteria	Gammaproteobacteria	Xanthomonadales	Sinobacteraceae	Panacagrimonas	Panacagrimonas_perspica
ugt74f2ugt76c4	OTU_1724	26.3333	Bacteria	Proteobacteria	Deltaproteobacteria	Myxococcales	Polyangiaceae	Polyangium	Polyangium_fumosum
ugt74f2ugt76c4	OTU_5021	7.91667	Bacteria	Actinobacteria	Actinobacteria	Actinomycetales	Pseudonocardiaceae	Aciditerrimonas	Aciditerrimonas_ferrireducens
ugt74f2ugt76c4	OTU_2063	24.4167	Bacteria	Proteobacteria	Alphaproteobacteria	Caulobacterales	Caulobacteraceae	Brevundimonas	Brevundimonas_kwangchunensis
ugt74f2ugt76c4	OTU_3379	8.91667	Bacteria	Chlamydiae	Chlamydiia	Chlamydiales	Parachlamydiaceae	Parachlamydia	Parachlamydia_acanthamoebae
ugt74f2ugt76c4	OTU_5538	12.25	Bacteria	Firmicutes	Erysipelotrichia	Erysipelotrichales	Erysipelotrichaceae	Turicibacter	Turicibacter_sanguinis
ugt74f2ugt76c4	OTU_531	72.8333	Bacteria	Proteobacteria	Alphaproteobacteria	Rhizobiales	Rhizobiaceae	Rhizobium	Neorhizobium_huautlense
ugt74f2ugt76c4	OTU_1645	72.0833	Bacteria	Bacteroidetes	Cytophagia	Cytophagales	Sphingobacteriaceae	Luteivirga	Luteivirga_sdotyamensis
ugt74f2ugt76c4	OTU_1413	19.8333	Bacteria	Actinobacteria	Actinobacteria	Actinomycetales	Micromonosporaceae	Catellatospora	Catellatospora_citrea_subsp._citrea
ugt74f2ugt76c4	OTU_3775	24.0833	Bacteria	Proteobacteria	Deltaproteobacteria	Bdellovibrionales	Bdellovibrionaceae	Bdellovibrio	Bdellovibrio_bacteriovorus
ugt74f2ugt76c4	OTU_1069	29.1667	Bacteria	Proteobacteria	Betaproteobacteria	Burkholderiales	Comamonadaceae	Kinneretia	Kinneretia_asaccharophila
ugt74f2ugt76c4	OTU_2477	20.8333	Bacteria	Proteobacteria	Deltaproteobacteria	Bdellovibrionales	Bacteriovoracaceae	Peredibacter	Peredibacter_starrii
ugt74f2ugt76c4	OTU_5094	6	Bacteria	Proteobacteria	Alphaproteobacteria	Rhizobiales	Hyphomicrobiaceae	Devosia	Devosia_albogilva
ugt74f2ugt76c4	OTU_1480	20	Bacteria	Proteobacteria	Alphaproteobacteria	Caulobacterales	Hyphomonadaceae	Hyphomonas	Hyphomonas_chukchiensis
ugt74f2ugt76c4	OTU_2359	8.33333	Bacteria	Verrucomicrobia	Opitutae	Opitutales	Opitutaceae	Opitutus	Opitutus_terrae
ugt74f2ugt76c4	OTU_3686	16.25	Bacteria	Proteobacteria	Alphaproteobacteria	Caulobacterales	Caulobacteraceae	Brevundimonas	Brevundimonas_faecalis
ugt74f2ugt76c4	OTU_3306	7.91667	Bacteria	Proteobacteria	Betaproteobacteria	Burkholderiales	Comamonadaceae	Acidovorax	Acidovorax_anthurii
ugt74f2ugt76c4	OTU_2614	10	Bacteria	Proteobacteria	Alphaproteobacteria	Rhizobiales	Phyllobacteriaceae	Chelativorans	Chelativorans_multitrophicus
ugt74f2ugt76c4	OTU_2812	7.75	Bacteria	Planctomycetes	Planctomycetia	Planctomycetales	Planctomycetaceae	Pirellula	Pirellula_staleyi
ugt74f2ugt76c4	OTU_3566	6.16667	Bacteria	Actinobacteria	Actinobacteria	Actinomycetales	Streptosporangiaceae	Nonomuraea	Nonomuraea_ferruginea
ugt74f2ugt76c4	OTU_2051	9.41667	Bacteria	Proteobacteria	Deltaproteobacteria	Myxococcales	Labilitrichaceae	Labilithrix	Labilithrix_luteola
ugt74f2ugt76c4	OTU_2240	9.25	Bacteria	Actinobacteria	Actinobacteria	Acidimicrobiales	Acidimicrobiaceae	Ilumatobacter	Ilumatobacter_fluminis
ugt74f2ugt76c4	OTU_1792	11.1667	Bacteria	Proteobacteria	Alphaproteobacteria	Caulobacterales	Caulobacteraceae	Phenylobacterium	Phenylobacterium_haematophilum
ugt74f2ugt76c4	OTU_2754	11	Bacteria	Proteobacteria	Alphaproteobacteria	Rhodobacterales	Rhodobacteraceae	Tabrizicola	Tabrizicola_aquatica
ugt74f2ugt76c4	OTU_4957	11.25	Bacteria	Proteobacteria	Alphaproteobacteria	Rhizobiales	Methylobacteriaceae	Microvirga	Pseudolabrys_taiwanensis
ugt74f2ugt76c4	OTU_2162	8.66667	Bacteria	Actinobacteria	Actinobacteria	Acidimicrobiales	Iamiaceae	Aquihabitans	Aquihabitans_daechungensis
ugt74f2ugt76c4	OTU_1699	22.25	Bacteria	Proteobacteria	Alphaproteobacteria	Rhizobiales	Hyphomicrobiaceae	Hyphomicrobium	Hyphomicrobium_zavarzinii
ugt74f2ugt76c4	OTU_2825	14	Bacteria	Actinobacteria	Actinobacteria	Actinomycetales	Microbacteriaceae	Lysinimonas	Lysinimonas_soli
ugt74f2ugt76c4	OTU_2550	7.16667	Bacteria	Bacteroidetes	Sphingobacteriia	Sphingobacteriales	Saprospiraceae	Lewinella	Lewinella_nigricans
ugt74f2ugt76c4	OTU_2166	8.25	Bacteria	Armatimonadetes	Armatimonadia	Armatimonadales	Armatimonadaceae	Armatimonas/Armatimonadetes_gp1	Unassigned
ugt74f2ugt76c4	OTU_2340	15.8333	Bacteria	Proteobacteria	Gammaproteobacteria	Xanthomonadales	Xanthomonadaceae	Thermomonas	Thermomonas_carbonis
ugt74f2ugt76c4	OTU_2862	8.66667	Bacteria	Proteobacteria	Gammaproteobacteria	Xanthomonadales	Sinobacteraceae	Steroidobacter	Steroidobacter_denitrificans
ugt74f2ugt76c4	OTU_3407	7.58333	Bacteria	Firmicutes	Clostridia	Clostridiales	Clostridiaceae_1	Clostridium_sensu_stricto	Clostridium_tagluense
ugt74f2ugt76c4	OTU_1949	10.5833	Bacteria	Proteobacteria	Betaproteobacteria	Burkholderiales	Burkholderiales_incertae_sedis	Ideonella	Sphaerotilus_hippei
ugt74f2ugt76c4	OTU_423	11.25	Bacteria	Proteobacteria	Betaproteobacteria	Burkholderiales	Oxalobacteraceae	Massilia	Massilia_yuzhufengensis
ugt74f2ugt76c4	OTU_2770	7	Bacteria	Proteobacteria	Deltaproteobacteria	Myxococcales	Phaselicystidaceae	Phaselicystis	Phaselicystis_flava
ugt74f2ugt76c4	OTU_2942	8	Bacteria	Proteobacteria	Deltaproteobacteria	Myxococcales	Haliangiaceae	Haliangium	Haliangium_tepidum
ugt74f2ugt76c4	OTU_2644	9.16667	Bacteria	Proteobacteria	Alphaproteobacteria	Sphingomonadales	Sphingomonadaceae	Sphingopyxis	Sphingopyxis_bauzanensis
ugt74f2ugt76c4	OTU_1945	13.5	Bacteria	Proteobacteria	Deltaproteobacteria	Bdellovibrionales	Bdellovibrionaceae	Bdellovibrio	Bdellovibrio_bacteriovorus
ugt74f2ugt76c4	OTU_2490	9.58333	Bacteria	Proteobacteria	Deltaproteobacteria	Myxococcales	Polyangiaceae	Sorangium	Sorangium_cellulosum
ugt74f2ugt76c4	OTU_2701	11.75	Bacteria	Proteobacteria	Betaproteobacteria	Rhodocyclales	Rhodocyclaceae	Sulfurisoma	Sulfurisoma_sediminicola
ugt74f2ugt76c4	OTU_1832	10.5833	Bacteria	Proteobacteria	Alphaproteobacteria	Rhizobiales	Methylobacteriaceae	Meganema	Ancylobacter_polymorphus
ugt74f2ugt76c4	OTU_2245	10.5	Bacteria	Proteobacteria	Alphaproteobacteria	Rhizobiales	Methylobacteriaceae	Microvirga	Microvirga_flocculans
ugt74f2ugt76c4	OTU_3026	9.08333	Bacteria	Proteobacteria	Alphaproteobacteria	Sphingomonadales	Sphingomonadaceae	Sphingomonas	Sphingomonas_fennica
ugt74f2ugt76c4	OTU_4172	6.25	Bacteria	Proteobacteria	Deltaproteobacteria	Myxococcales	Phaselicystidaceae	Phaselicystis	Phaselicystis_flava
ugt74f2ugt76c4	OTU_3540	10.4167	Bacteria	Proteobacteria	Betaproteobacteria	Burkholderiales	Comamonadaceae	Xenophilus	Xenophilus_aerolatus
ugt74f2ugt76c4	OTU_2653	13.6667	Bacteria	Proteobacteria	Betaproteobacteria	Burkholderiales	Oxalobacteraceae	Herbaspirillum	Herbaspirillum_aquaticum
ugt74f2ugt76c4	OTU_3866	8.16667	Bacteria	Proteobacteria	Alphaproteobacteria	Rhizobiales	Rhizobiaceae	Rhizobium	Rhizobium_radiobacter
ugt74f2ugt76c4	OTU_4070	11.4167	Bacteria	Bacteroidetes	Flavobacteriia	Flavobacteriales	Flavobacteriaceae	Flavobacterium	Flavobacterium_nitratireducens
ugt74f2ugt76c4	OTU_3377	13.5	Bacteria	Cyanobacteria	Cyanobacteria	Unassigned	Family_I	GpI	Unassigned
ugt74f2ugt76c4	OTU_1559	13.8333	Bacteria	Proteobacteria	Deltaproteobacteria	Myxococcales	Nannocystaceae	Nannocystis	Nannocystis_exedens
ugt74f2ugt76c4	OTU_3252	8.58333	Bacteria	Proteobacteria	Alphaproteobacteria	Rhodospirillales	Rhodospirillaceae	Telmatospirillum	Telmatospirillum_siberiense
ugt74f2ugt76c4	OTU_2235	12.0833	Bacteria	Proteobacteria	Betaproteobacteria	Burkholderiales	Oxalobacteraceae	Duganella	Duganella_zoogloeoides
ugt74f2ugt76c4	OTU_6334	12.0833	Bacteria	Bacteroidetes	Flavobacteriia	Flavobacteriales	Flavobacteriaceae	Chryseobacterium	Chryseobacterium_arachidis
ugt74f2ugt76c4	OTU_2733	14.1667	Bacteria	Proteobacteria	Alphaproteobacteria	Rhizobiales	Bradyrhizobiaceae	Rhodopseudomonas	Rhodopseudomonas_rhenobacensis
ugt74f2ugt76c4	OTU_2179	20.4167	Bacteria	Proteobacteria	Alphaproteobacteria	Sphingomonadales	Sphingomonadaceae	Sphingobium	Sphingobium_rhizovicinum
ugt74f2ugt76c4	OTU_2053	28.25	Bacteria	Proteobacteria	Alphaproteobacteria	Caulobacterales	Caulobacteraceae	Caulobacter	Caulobacter_henricii
ugt74f2ugt76c4	OTU_4294	12.25	Bacteria	Proteobacteria	Gammaproteobacteria	Desulfuromonadales	Desulfuromonadaceae	Pelobacter	Solimonas_soli
ugt74f2ugt76c4	OTU_4336	6.75	Bacteria	Proteobacteria	Deltaproteobacteria	Myxococcales	Polyangiaceae	Chondromyces	Chondromyces_robustus
ugt74f2ugt76c4	OTU_4136	23.9167	Bacteria	Proteobacteria	Alphaproteobacteria	Sphingomonadales	Sphingomonadaceae	Sphingomonas	Rhizorhapis_suberifaciens
ugt74f2ugt76c4	OTU_3005	9	Bacteria	Bacteroidetes	Flavobacteriia	Flavobacteriales	Flavobacteriaceae	Flavobacterium	Flavobacterium_soli
ugt74f2ugt76c4	OTU_1200	75.75	Bacteria	Proteobacteria	Gammaproteobacteria	Pseudomonadales	Pseudomonadaceae	Rhizobacter	Piscinibacter_aquaticus
ugt74f2ugt76c4	OTU_5199	11.5	Bacteria	Actinobacteria	Actinobacteria	Actinomycetales	Streptosporangiaceae	Nonomuraea	Nonomuraea_soli
ugt74f2ugt76c4	OTU_2602	45.9167	Bacteria	Proteobacteria	Deltaproteobacteria	Syntrophobacterales	Desulfobulbaceae	Syntrophobacter	Desulfovibrio_piger
ugt74f2ugt76c4	OTU_2828	53.1667	Bacteria	Bacteroidetes	Flavobacteriia	Flavobacteriales	Flavobacteriaceae	Chryseobacterium	Chryseobacterium_arachidis
ugt74f2ugt76c4	OTU_2933	29.25	Bacteria	Actinobacteria	Actinobacteria	Actinomycetales	Micromonosporaceae	Micromonospora	Phytohabitans_flavus
ugt74f2ugt76c4	OTU_6302	9.91667	Bacteria	Proteobacteria	Alphaproteobacteria	Sphingomonadales	Sphingomonadaceae	Sphingobium	Sphingobium_olei
ugt74f2ugt76c4	OTU_3879	7	Bacteria	Bacteroidetes	Flavobacteriia	Flavobacteriales	Flavobacteriaceae	Flavobacterium	Flavobacterium_subsaxonicum
ugt74f2ugt76c4	OTU_5140	12.0833	Bacteria	Proteobacteria	Alphaproteobacteria	Rhizobiales	Rhizobiaceae	Rhizobium	Rhizobium_vignae
ugt74f2ugt76c4	OTU_4284	15.6667	Bacteria	Proteobacteria	Alphaproteobacteria	Rhizobiales	Rhizobiaceae	Rhizobium	Rhizobium_larrymoorei
ugt74f2ugt76c4	OTU_5333	16.3333	Bacteria	Proteobacteria	Alphaproteobacteria	Rickettsiales	Rickettsiaceae	Rickettsia	Rickettsia_canadensis
ugt74f2ugt76c4	OTU_3145	10.75	Bacteria	Proteobacteria	Alphaproteobacteria	Sphingomonadales	Sphingomonadaceae	Sphingobium	Sphingobium_rhizovicinum
ugt74f2ugt76c4	OTU_5795	8.58333	Bacteria	Firmicutes	Bacilli	Bacillales	Paenibacillaceae_1	Paenibacillus	Paenibacillus_panacisoli
tps/06/19/25/30	OTU_2398	22.5	Bacteria	Proteobacteria	Betaproteobacteria	Burkholderiales	Burkholderiales_incertae_sedis	Rivibacter	Rivibacter_subsaxonicus
tps/06/19/25/30	OTU_679	61.125	Bacteria	Actinobacteria	Actinobacteria	Actinomycetales	Nocardioidaceae	Nocardioides	Nocardioides_ginsengagri
tps/06/19/25/30	OTU_750	11.75	Bacteria	Actinobacteria	Actinobacteria	Actinomycetales	Iamiaceae	Aquihabitans	Aquihabitans_daechungensis
tps/06/19/25/30	OTU_1372	25.25	Bacteria	Chloroflexi	Chloroflexia	Chloroflexales	Chloroflexaceae	Roseiflexus	Roseiflexus_castenholzii
tps/06/19/25/30	OTU_189	603.625	Bacteria	Actinobacteria	Actinobacteria	Actinomycetales	Micromonosporaceae	Actinoplanes	Actinoplanes_friuliensis
tps/06/19/25/30	OTU_2170	10.75	Bacteria	Bacteroidetes	Cytophagia	Cytophagales	Cytophagaceae	Adhaeribacter	Roseivirga_spongicola
tps/06/19/25/30	OTU_390	195.25	Bacteria	Proteobacteria	Betaproteobacteria	Burkholderiales	Oxalobacteraceae	Herbaspirillum	Herbaspirillum_rubrisubalbicans
tps/06/19/25/30	OTU_1282	24.5	Bacteria	Chloroflexi	Chloroflexia	Herpetosiphonales	Herpetosiphonaceae	Herpetosiphon	Arenimonas_composti
tps/06/19/25/30	OTU_896	93	Bacteria	Proteobacteria	Betaproteobacteria	Rhodocyclales	Rhodocyclaceae	Uliginosibacterium	Uliginosibacterium_gangwonense
tps/06/19/25/30	OTU_2687	20.875	Bacteria	Proteobacteria	Deltaproteobacteria	Myxococcales	Myxococcaceae	Corallococcus	Corallococcus_coralloides
tps/06/19/25/30	OTU_492	96.125	Bacteria	Proteobacteria	Betaproteobacteria	Burkholderiales	Burkholderiaceae	Limnobacter	Limnobacter_thiooxidans
tps/06/19/25/30	OTU_2129	21.875	Bacteria	Firmicutes	Bacilli	Bacillales	Paenibacillaceae_1	Paenibacillus	Paenibacillus_dongdonensis
tps/06/19/25/30	OTU_1292	60.875	Bacteria	Proteobacteria	Alphaproteobacteria	Rhizobiales	Rhizobiaceae	Rhizobium	Rhizobium_subbaraonis
tps/06/19/25/30	OTU_1062	271.875	Bacteria	Proteobacteria	Betaproteobacteria	Burkholderiales	Oxalobacteraceae	Massilia	Massilia_kyonggiensis
tps/06/19/25/30	OTU_1291	23.5	Bacteria	Proteobacteria	Alphaproteobacteria	Caulobacterales	Hyphomonadaceae	Hirschia	Hirschia_litorea
tps/06/19/25/30	OTU_1382	21.125	Bacteria	Proteobacteria	Alphaproteobacteria	Rhizobiales	Sphingomonadaceae	Cohaesibacter	Cohaesibacter_gelatinilyticus
tps/06/19/25/30	OTU_749	194.25	Bacteria	Proteobacteria	Gammaproteobacteria	Pseudomonadales	Pseudomonadaceae	Pseudomonas	Pseudomonas_marincola
tps/06/19/25/30	OTU_634	232.625	Bacteria	Proteobacteria	Betaproteobacteria	Burkholderiales	Comamonadaceae	Polaromonas	Polaromonas_aquatica
tps/06/19/25/30	OTU_713	209.875	Bacteria	Proteobacteria	Alphaproteobacteria	Rhizobiales	Rhizobiaceae	Rhizobium	Rhizobium_radiobacter
tps/06/19/25/30	OTU_2335	14.875	Bacteria	Proteobacteria	Gammaproteobacteria	Xanthomonadales	Xanthomonadaceae	Lysobacter	Lysobacter_daejeonensis
tps/06/19/25/30	OTU_2168	14.625	Bacteria	Actinobacteria	Actinobacteria	Actinomycetales	Micromonosporaceae	Verrucosispora	Verrucosispora_maris
tps/06/19/25/30	OTU_447	154	Bacteria	Proteobacteria	Betaproteobacteria	Burkholderiales	Burkholderiaceae	Ralstonia	Ralstonia_mannitolilytica
tps/06/19/25/30	OTU_1297	46.25	Bacteria	Proteobacteria	Betaproteobacteria	Burkholderiales	Burkholderiaceae	Burkholderia	Burkholderia_graminis
tps/06/19/25/30	OTU_337	371.75	Bacteria	Proteobacteria	Betaproteobacteria	Burkholderiales	Burkholderiaceae	Burkholderia	Burkholderia_unamae
tps/06/19/25/30	OTU_4449	7.375	Bacteria	Firmicutes	Bacilli	Bacillales	Paenibacillaceae_1	Paenibacillus	Paenibacillus_urinalis
tps/06/19/25/30	OTU_2215	8	Bacteria	Proteobacteria	Alphaproteobacteria	Rhizobiales	Bradyrhizobiaceae	Bradyrhizobium	Bradyrhizobium_manausense
tps/06/19/25/30	OTU_4697	8.625	Bacteria	Proteobacteria	Alphaproteobacteria	Rhodobacterales	Rhodobacteraceae	Amaricoccus	Amaricoccus_kaplicensis
tps/06/19/25/30	OTU_1920	13.25	Bacteria	Acidobacteria	Acidobacteria_Gp10	Desulfovibrionales	Chloroplast	Gp10	Desulfovibrio_ferrireducens
tps/06/19/25/30	OTU_2739	13.5	Bacteria	Proteobacteria	Gammaproteobacteria	Xanthomonadales	Xanthomonadaceae	Rudaea	Rudaea_cellulosilytica
tps/06/19/25/30	OTU_599	130.25	Bacteria	Proteobacteria	Gammaproteobacteria	Pseudomonadales	Pseudomonadaceae	Pseudomonas	Pseudomonas_brenneri
tps/06/19/25/30	OTU_791	70.375	Bacteria	Proteobacteria	Betaproteobacteria	Burkholderiales	Burkholderiaceae	Burkholderia	Burkholderia_mimosarum
tps/06/19/25/30	OTU_1148	29.75	Bacteria	Actinobacteria	Actinobacteria	Actinomycetales	Micromonosporaceae	Verrucosispora	Verrucosispora_wenchangensis
tps/06/19/25/30	OTU_2520	9.5	Bacteria	Actinobacteria	Actinobacteria	Solirubrobacterales	Conexibacteraceae	Conexibacter	Conexibacter_arvalis
tps/06/19/25/30	OTU_1628	38.5	Bacteria	Nitrospirae	Nitrospira	Nitrospirales	Nitrospiraceae	Nitrospira	Sulfurivirga_caldicuralii
tps/06/19/25/30	OTU_2090	23.5	Bacteria	Acidobacteria	Acidobacteria_Gp2	Unassigned	Unassigned	Gp2	Unassigned
tps/06/19/25/30	OTU_4273	15	Bacteria	Firmicutes	Bacilli	Bacillales	Thermoactinomycetaceae_2	Planifilum	Planifilum_yunnanense
tps/06/19/25/30	OTU_2590	13.5	Bacteria	Proteobacteria	Betaproteobacteria	Burkholderiales	Oxalobacteraceae	Massilia	Massilia_consociata
tps/06/19/25/30	OTU_90	14.25	Bacteria	Proteobacteria	Betaproteobacteria	Burkholderiales	Oxalobacteraceae	Massilia	Oxalicibacterium_horti
tps/06/19/25/30	OTU_2671	18.625	Bacteria	Bacteroidetes	Flavobacteriia	Flavobacteriales	Flavobacteriaceae	Flavobacterium	Flavobacterium_enshiense
tps/06/19/25/30	OTU_1433	89.25	Bacteria	Proteobacteria	Gammaproteobacteria	Oceanospirillales	Oceanospirillaceae	Nitrincola	Nitrincola_lacisaponensis
tps/06/19/25/30	OTU_4175	8.125	Bacteria	Firmicutes	Bacilli	Bacillales	Staphylococcaceae	Staphylococcus	Staphylococcus_capitis_subsp._capitis
tps/06/19/25/30	OTU_3692	12.5	Bacteria	Proteobacteria	Gammaproteobacteria	Xanthomonadales	Xanthomonadaceae	Lysobacter	Lysobacter_daejeonensis
tps/06/19/25/30	OTU_1493	35.25	Bacteria	Proteobacteria	Betaproteobacteria	Burkholderiales	Burkholderiaceae	Burkholderia	Burkholderia_ferrariae
tps/06/19/25/30	OTU_3135	13.375	Bacteria	Proteobacteria	Betaproteobacteria	Burkholderiales	Burkholderiaceae	Burkholderia	Burkholderia_insulsa
tps/06/19/25/30	OTU_3765	12	Bacteria	Firmicutes	Bacilli	Bacillales	Paenibacillaceae_1	Paenibacillus	Paenibacillus_nanensis
tps/06/19/25/30	OTU_4892	10	Bacteria	Actinobacteria	Actinobacteria	Actinomycetales	Nocardiaceae	Rhodococcus	Rhodococcus_fascians
tps/06/19/25/30	OTU_4425	65.625	Bacteria	Firmicutes	Clostridia	Clostridiales	Clostridiales_Incertae_Sedis_XI	Peptoniphilus	Ezakiella_peruensis
tps/06/19/25/30	OTU_5757	11.5	Bacteria	Proteobacteria	Deltaproteobacteria	Oligoflexales	Oligoflexaceae	Oligoflexus	Oligoflexus_tunisiensis
tps/06/19/25/30	OTU_5996	26.25	Bacteria	Bacteroidetes	Bacteroidia	Bacteroidales	Prevotellaceae	Prevotella	Prevotella_timonensis
gfpps1/2/3/4	OTU_279	505.667	Bacteria	Actinobacteria	Actinobacteria	Actinomycetales	Pseudonocardiaceae	Actinophytocola	Actinophytocola_burenkhanensis
gfpps1/2/3/4	OTU_6	12782.2	Bacteria	Proteobacteria	Betaproteobacteria	Burkholderiales	Oxalobacteraceae	Noviherbaspirillum	Noviherbaspirillum_malthae
gfpps1/2/3/4	OTU_1635	53.5556	Bacteria	Actinobacteria	Actinobacteria	Actinomycetales	Streptomycetaceae	Streptomyces	Streptomyces_capoamus
gfpps1/2/3/4	OTU_515	80.5556	Bacteria	Actinobacteria	Actinobacteria	Actinomycetales	Thermomonosporaceae	Actinocorallia	Actinocorallia_glomerata
gfpps1/2/3/4	OTU_377	73.6667	Bacteria	Actinobacteria	Actinobacteria	Actinomycetales	Streptomycetaceae	Streptomyces	Streptomyces_cellulosae
gfpps1/2/3/4	OTU_1270	14.3333	Bacteria	Actinobacteria	Actinobacteria	Actinomycetales	Pseudonocardiaceae	Saccharothrix	Saccharothrix_algeriensis
gfpps1/2/3/4	OTU_130	460.444	Bacteria	Actinobacteria	Actinobacteria	Actinomycetales	Microbacteriaceae	Agromyces	Agromyces_allii
gfpps1/2/3/4	OTU_230	215.333	Bacteria	Actinobacteria	Actinobacteria	Actinomycetales	Streptomycetaceae	Streptomyces	Streptomyces_xanthophaeus
gfpps1/2/3/4	OTU_404	237.111	Bacteria	Proteobacteria	Betaproteobacteria	Burkholderiales	Comamonadaceae	Variovorax	Variovorax_paradoxus
gfpps1/2/3/4	OTU_1130	16.3333	Bacteria	Actinobacteria	Actinobacteria	Gaiellales	Gaiellaceae	Gaiella	Gaiella_occulta
gfpps1/2/3/4	OTU_248	305.667	Bacteria	Actinobacteria	Actinobacteria	Actinomycetales	Streptomycetaceae	Streptomyces	Streptomyces_flavoviridis
gfpps1/2/3/4	OTU_312	127.667	Bacteria	Actinobacteria	Actinobacteria	Actinomycetales	Microbacteriaceae	Agromyces	Agromyces_marinus
gfpps1/2/3/4	OTU_610	60.7778	Bacteria	Actinobacteria	Actinobacteria	Actinomycetales	Streptomycetaceae	Streptomyces	Streptomyces_cellulosae
gfpps1/2/3/4	OTU_903	91.3333	Bacteria	Proteobacteria	Betaproteobacteria	Burkholderiales	Burkholderiaceae	Cupriavidus	Cupriavidus_taiwanensis
gfpps1/2/3/4	OTU_141	661.444	Bacteria	Actinobacteria	Actinobacteria	Actinomycetales	Streptomycetaceae	Streptomyces	Streptomyces_heliomycini
gfpps1/2/3/4	OTU_887	34.2222	Bacteria	Actinobacteria	Actinobacteria	Actinomycetales	Nocardioidaceae	Nocardioides	Nocardioides_aromaticivorans
gfpps1/2/3/4	OTU_587	79.7778	Bacteria	Proteobacteria	Betaproteobacteria	Burkholderiales	Alcaligenaceae	Achromobacter	Achromobacter_xylosoxidans_subsp._xylosoxidans
gfpps1/2/3/4	OTU_626	99.7778	Bacteria	Actinobacteria	Actinobacteria	Actinomycetales	Streptomycetaceae	Streptomyces	Streptomyces_filamentosus
gfpps1/2/3/4	OTU_159	380.667	Bacteria	Proteobacteria	Alphaproteobacteria	Sphingomonadales	Sphingomonadaceae	Sphingomonas	Sphingomonas_naasensis
gfpps1/2/3/4	OTU_79	1069.33	Bacteria	Actinobacteria	Actinobacteria	Actinomycetales	Streptomycetaceae	Streptomyces	Streptomyces_mutomycini
gfpps1/2/3/4	OTU_1519	13.4444	Bacteria	Proteobacteria	Gammaproteobacteria	Xanthomonadales	Sinobacteraceae	Steroidobacter	Steroidobacter_agariperforans
gfpps1/2/3/4	OTU_700	35.6667	Bacteria	Planctomycetes	Planctomycetia	Planctomycetales	Planctomycetaceae	Blastopirellula	Blastopirellula_cremea
gfpps1/2/3/4	OTU_2765	13.5556	Bacteria	Bacteroidetes	Flavobacteriia	Flavobacteriales	Flavobacteriaceae	Flavobacterium	Flavobacterium_hauense
gfpps1/2/3/4	OTU_534	303.889	Bacteria	Actinobacteria	Actinobacteria	Actinomycetales	Pseudonocardiaceae	Lentzea	Lentzea_jiangxiensis
gfpps1/2/3/4	OTU_1010	52.8889	Bacteria	Proteobacteria	Betaproteobacteria	Burkholderiales	Burkholderiaceae	Cupriavidus	Cupriavidus_alkaliphilus
gfpps1/2/3/4	OTU_386	112.222	Bacteria	Actinobacteria	Actinobacteria	Actinomycetales	Streptomycetaceae	Streptomyces	Streptomyces_xanthophaeus
gfpps1/2/3/4	OTU_1861	10.5556	Bacteria	Actinobacteria	Actinobacteria	Acidimicrobiales	Acidimicrobiaceae	Ilumatobacter	Ilumatobacter_nonamiense
gfpps1/2/3/4	OTU_808	230.111	Bacteria	Actinobacteria	Actinobacteria	Actinomycetales	Pseudonocardiaceae	Actinophytocola	Actinophytocola_burenkhanensis
gfpps1/2/3/4	OTU_1117	37.6667	Bacteria	Firmicutes	Bacilli	Bacillales	Bacillaceae_1	Bacillus	Bacillus_safensis
gfpps1/2/3/4	OTU_227	331.111	Bacteria	Actinobacteria	Actinobacteria	Actinomycetales	Streptomycetaceae	Streptomyces	Streptomyces_chryseus
gfpps1/2/3/4	OTU_712	55	Bacteria	Proteobacteria	Betaproteobacteria	Burkholderiales	Comamonadaceae	Variovorax	Variovorax_soli
gfpps1/2/3/4	OTU_2691	13.3333	Bacteria	Proteobacteria	Gammaproteobacteria	Xanthomonadales	Sinobacteraceae	Steroidobacter	Steroidobacter_agariperforans
gfpps1/2/3/4	OTU_287	199.111	Bacteria	Actinobacteria	Actinobacteria	Actinomycetales	Streptomycetaceae	Streptomyces	Streptomyces_matensis
gfpps1/2/3/4	OTU_1590	13.7778	Bacteria	Proteobacteria	Alphaproteobacteria	Sphingomonadales	Sphingomonadaceae	Novosphingobium	Parablastomonas_arctica
gfpps1/2/3/4	OTU_340	121.444	Bacteria	Actinobacteria	Actinobacteria	Actinomycetales	Microbacteriaceae	Agromyces	Agromyces_neolithicus
gfpps1/2/3/4	OTU_5817	10.2222	Bacteria	Proteobacteria	Gammaproteobacteria	Rhodocyclales	Rhodocyclaceae	Desulfuromonas	Desulfuromonas_michiganensis
gfpps1/2/3/4	OTU_264	219.444	Bacteria	Actinobacteria	Actinobacteria	Actinomycetales	Streptomycetaceae	Streptomyces	Streptomyces_fimbriatus
gfpps1/2/3/4	OTU_1170	26.6667	Bacteria	Actinobacteria	Actinobacteria	Actinomycetales	Pseudonocardiaceae	Pseudonocardia	Pseudonocardia_parietis
gfpps1/2/3/4	OTU_1707	12.3333	Bacteria	Planctomycetes	Planctomycetia	Planctomycetales	Planctomycetaceae	Pirellula	Pirellula_staleyi
gfpps1/2/3/4	OTU_3317	8.55556	Bacteria	Proteobacteria	Betaproteobacteria	Burkholderiales	Oxalobacteraceae	Noviherbaspirillum	Noviherbaspirillum_malthae
gfpps1/2/3/4	OTU_2070	15	Bacteria	Proteobacteria	Alphaproteobacteria	Caulobacterales	Hyphomonadaceae	Hyphomonas	Hyphomonas_chukchiensis
gfpps1/2/3/4	OTU_2379	12.1111	Bacteria	Proteobacteria	Alphaproteobacteria	Rhizobiales	Hyphomicrobiaceae	Devosia	Devosia_soli
gfpps1/2/3/4	OTU_793	28.5556	Bacteria	Proteobacteria	Alphaproteobacteria	Rhizobiales	Rhodobiaceae	Methyloceanibacter	Methyloceanibacter_caenitepidi
gfpps1/2/3/4	OTU_1888	8.55556	Bacteria	Actinobacteria	Actinobacteria	Actinomycetales	Micromonosporaceae	Catellatospora	Catellatospora_methionotrophica
gfpps1/2/3/4	OTU_1288	21.2222	Bacteria	Proteobacteria	Deltaproteobacteria	Myxococcales	Polyangiaceae	Phaselicystis	Phaselicystis_flava
gfpps1/2/3/4	OTU_756	36.8889	Bacteria	Actinobacteria	Actinobacteria	Gaiellales	Gaiellaceae	Gaiella	Gaiella_occulta
gfpps1/2/3/4	OTU_370	104.667	Bacteria	Actinobacteria	Actinobacteria	Actinomycetales	Streptomycetaceae	Streptomyces	Streptomyces_hirsutus
gfpps1/2/3/4	OTU_1936	11	Bacteria	Actinobacteria	Actinobacteria	Actinomycetales	Cellulomonadaceae	Cellulomonas	Cellulomonas_hominis
gfpps1/2/3/4	OTU_741	42.7778	Bacteria	Proteobacteria	Deltaproteobacteria	Myxococcales	Myxococcaceae	Aggregicoccus	Aggregicoccus_edonensis
gfpps1/2/3/4	OTU_298	132.222	Bacteria	Actinobacteria	Actinobacteria	Actinomycetales	Streptomycetaceae	Streptomyces	Streptomyces_thermocarboxydus
gfpps1/2/3/4	OTU_1638	12.7778	Bacteria	Proteobacteria	Alphaproteobacteria	Rhodospirillales	Rhodospirillaceae	Skermanella	Bradyrhizobium_manausense
gfpps1/2/3/4	OTU_852	57	Bacteria	Proteobacteria	Betaproteobacteria	Burkholderiales	Comamonadaceae	Variovorax	Variovorax_boronicumulans
gfpps1/2/3/4	OTU_1864	12.5556	Bacteria	Actinobacteria	Actinobacteria	Actinomycetales	Mycobacteriaceae	Mycobacterium	Mycobacterium_frederiksbergense
gfpps1/2/3/4	OTU_317	145.778	Bacteria	Proteobacteria	Deltaproteobacteria	Myxococcales	Polyangiaceae	Sorangium	Sorangium_cellulosum
gfpps1/2/3/4	OTU_479	60.7778	Bacteria	Actinobacteria	Actinobacteria	Actinomycetales	Microbacteriaceae	Agromyces	Agromyces_allii
gfpps1/2/3/4	OTU_1003	27.7778	Bacteria	Proteobacteria	Alphaproteobacteria	Rhodospirillales	Unassigned	Reyranella	Reyranella_soli
gfpps1/2/3/4	OTU_1269	22.4444	Bacteria	Actinobacteria	Actinobacteria	Actinomycetales	Nocardioidaceae	Nocardioides	Nocardioides_ultimimeridianus
gfpps1/2/3/4	OTU_4214	13.3333	Bacteria	Chlamydiae	Chlamydiia	Chlamydiales	Chlamydiaceae	Chlamydia	Chlamydophila_psittaci
gfpps1/2/3/4	OTU_1630	21	Bacteria	Actinobacteria	Actinobacteria	Actinomycetales	Nocardioidaceae	Nocardioides	Nocardioides_conyzicola
gfpps1/2/3/4	OTU_1174	76.6667	Bacteria	Actinobacteria	Actinobacteria	Actinomycetales	Streptomycetaceae	Streptomyces	Streptomyces_orinoci
gfpps1/2/3/4	OTU_2102	8.77778	Bacteria	Actinobacteria	Actinobacteria	Actinomycetales	Geodermatophilaceae	Blastococcus	Blastococcus_jejuensis
gfpps1/2/3/4	OTU_590	51.5556	Bacteria	Actinobacteria	Actinobacteria	Actinomycetales	Streptomycetaceae	Streptomyces	Streptomyces_antibioticus
gfpps1/2/3/4	OTU_2750	10.3333	Bacteria	Proteobacteria	Deltaproteobacteria	Bacillales	Bacillaceae_1	Bacillus	Geobacter_toluenoxydans
gfpps1/2/3/4	OTU_2628	11.3333	Bacteria	Actinobacteria	Actinobacteria	Actinomycetales	Pseudonocardiaceae	Pseudonocardia	Pseudonocardia_babensis
gfpps1/2/3/4	OTU_499	65.5556	Bacteria	Actinobacteria	Actinobacteria	Actinomycetales	Micromonosporaceae	Actinoplanes	Actinoplanes_capillaceus
gfpps1/2/3/4	OTU_1064	31.6667	Bacteria	Actinobacteria	Actinobacteria	Actinomycetales	Microbacteriaceae	Microbacterium	Microbacterium_kitamiense
gfpps1/2/3/4	OTU_3002	8.66667	Bacteria	Firmicutes	Bacilli	Bacillales	Bacillaceae_1	Bacillus	Bacillus_kokeshiiformis
gfpps1/2/3/4	OTU_2193	9.88889	Bacteria	Proteobacteria	Betaproteobacteria	Burkholderiales	Comamonadaceae	Variovorax	Xylophilus_ampelinus
gfpps1/2/3/4	OTU_1351	78.1111	Bacteria	Actinobacteria	Actinobacteria	Actinomycetales	Streptomycetaceae	Streptomyces	Streptomyces_koyangensis
gfpps1/2/3/4	OTU_1497	10.8889	Bacteria	Proteobacteria	Alphaproteobacteria	Sphingomonadales	Sphingomonadaceae	Sphingomonas	Sphingomonas_sediminicola
gfpps1/2/3/4	OTU_1583	11.1111	Bacteria	Actinobacteria	Actinobacteria	Actinomycetales	Nocardioidaceae	Nocardioides	Nocardioides_islandensis
gfpps1/2/3/4	OTU_753	58.6667	Bacteria	Proteobacteria	Deltaproteobacteria	Myxococcales	Polyangiaceae	Polyangium	Polyangium_fumosum
gfpps1/2/3/4	OTU_1894	31.2222	Bacteria	Proteobacteria	Alphaproteobacteria	Sphingomonadales	Sphingomonadaceae	Rhizorhapis	Rhizorhapis_suberifaciens
gfpps1/2/3/4	OTU_383	395.667	Bacteria	Actinobacteria	Actinobacteria	Actinomycetales	Micromonosporaceae	Actinoplanes	Actinoplanes_friuliensis
gfpps1/2/3/4	OTU_1986	18.8889	Bacteria	Proteobacteria	Gammaproteobacteria	Xanthomonadales	Sinobacteraceae	Steroidobacter	Steroidobacter_agariperforans
gfpps1/2/3/4	OTU_2098	10.4444	Bacteria	Actinobacteria	Actinobacteria	Acidimicrobiales	Iamiaceae	Aquihabitans	Aquihabitans_daechungensis
gfpps1/2/3/4	OTU_1194	22.3333	Bacteria	Proteobacteria	Betaproteobacteria	Burkholderiales	Burkholderiaceae	Chitinimonas	Chitinimonas_viridis
gfpps1/2/3/4	OTU_5713	18.6667	Bacteria	Actinobacteria	Actinobacteria	Actinomycetales	Nocardioidaceae	Nocardioides	Nocardioides_caeni
gfpps1/2/3/4	OTU_1536	11.7778	Bacteria	Proteobacteria	Gammaproteobacteria	Xanthomonadales	Sinobacteraceae	Steroidobacter	Steroidobacter_denitrificans
gfpps1/2/3/4	OTU_2509	9.11111	Bacteria	Actinobacteria	Actinobacteria	Actinomycetales	Nocardioidaceae	Aeromicrobium	Aeromicrobium_halocynthiae
gfpps1/2/3/4	OTU_1544	16	Bacteria	Firmicutes	Bacilli	Bacillales	Bacillaceae_1	Fictibacillus	Fictibacillus_barbaricus
gfpps1/2/3/4	OTU_1596	14.8889	Bacteria	Proteobacteria	Alphaproteobacteria	Rhizobiales	Phyllobacteriaceae	Chelativorans	Chelativorans_intermedius
gfpps1/2/3/4	OTU_3124	8.66667	Bacteria	Planctomycetes	Planctomycetia	Planctomycetales	Planctomycetaceae	Blastopirellula	Blastopirellula_cremea
gfpps1/2/3/4	OTU_763	73.1111	Bacteria	Actinobacteria	Actinobacteria	Actinomycetales	Streptomycetaceae	Streptomyces	Streptomyces_canarius
gfpps1/2/3/4	OTU_1588	12.8889	Bacteria	Proteobacteria	Alphaproteobacteria	Sphingomonadales	Sphingomonadaceae	Sphingomonas	Sphingomonas_sediminicola
gfpps1/2/3/4	OTU_1452	67.7778	Bacteria	Proteobacteria	Gammaproteobacteria	Pseudomonadales	Pseudomonadaceae	Pseudomonas	Pseudomonas_marincola
gfpps1/2/3/4	OTU_2303	5.66667	Bacteria	Proteobacteria	Alphaproteobacteria	Sneathiellales	Sneathiellaceae	Ferrovibrio	Ferrovibrio_denitrificans
gfpps1/2/3/4	OTU_484	198.222	Bacteria	Proteobacteria	Alphaproteobacteria	Rhizobiales	Rhizobiaceae	Rhizobium	Rhizobium_radiobacter
gfpps1/2/3/4	OTU_1698	39.3333	Bacteria	Proteobacteria	Alphaproteobacteria	Rhizobiales	Methylocystaceae	Methylosinus	Methylosinus_trichosporium
gfpps1/2/3/4	OTU_2707	8	Bacteria	Proteobacteria	Alphaproteobacteria	Rhizobiales	Rhodobiaceae	Chelativorans	Chelativorans_intermedius
gfpps1/2/3/4	OTU_2648	14.4444	Bacteria	Proteobacteria	Alphaproteobacteria	Rhizobiales	Methylobacteriaceae	Microvirga	Microvirga_subterranea
gfpps1/2/3/4	OTU_2033	13.7778	Bacteria	Proteobacteria	Alphaproteobacteria	Rhizobiales	Methylobacteriaceae	Microvirga	Microvirga_subterranea
gfpps1/2/3/4	OTU_2273	21.6667	Bacteria	Proteobacteria	Alphaproteobacteria	Rhizobiales	Xanthobacteraceae	Pseudolabrys	Pseudolabrys_taiwanensis
gfpps1/2/3/4	OTU_1126	23.4444	Bacteria	Actinobacteria	Actinobacteria	Actinomycetales	Streptomycetaceae	Streptomyces	Streptomyces_scopiformis
gfpps1/2/3/4	OTU_2407	7	Bacteria	Chloroflexi	Ardenticatenia	Ardenticatenales	Ardenticatenaceae	Ardenticatena	Ardenticatena_maritima
gfpps1/2/3/4	OTU_2315	8	Bacteria	Gemmatimonadetes	Gemmatimonadetes	Gemmatimonadales	Gemmatimonadaceae	Gemmatimonas	Gemmatimonas_aurantiaca
gfpps1/2/3/4	OTU_2349	10.3333	Bacteria	Proteobacteria	Alphaproteobacteria	Rhizobiales	Methylobacteriaceae	Microvirga	Microvirga_aerilata
gfpps1/2/3/4	OTU_1393	42.3333	Bacteria	Actinobacteria	Actinobacteria	Actinomycetales	Micromonosporaceae	Micromonospora	Micromonospora_chokoriensis
gfpps1/2/3/4	OTU_2745	7.44444	Bacteria	Planctomycetes	Planctomycetia	Planctomycetales	Planctomycetaceae	Blastopirellula	Blastopirellula_cremea
gfpps1/2/3/4	OTU_1911	19.5556	Bacteria	Proteobacteria	Alphaproteobacteria	Rhizobiales	Hyphomicrobiaceae	Pedomicrobium	Pedomicrobium_manganicum
gfpps1/2/3/4	OTU_1857	10.4444	Bacteria	Proteobacteria	Alphaproteobacteria	Rhizobiales	Rhodobiaceae	Pseudaminobacter	Pseudaminobacter_defluvii
gfpps1/2/3/4	OTU_2445	38.5556	Bacteria	Proteobacteria	Alphaproteobacteria	Rhodospirillales	Rhodospirillaceae	Dongia	Dongia_mobilis
gfpps1/2/3/4	OTU_1595	15	Bacteria	Firmicutes	Bacilli	Bacillales	Planococcaceae	Paenisporosarcina	Paenisporosarcina_macmurdoensis
gfpps1/2/3/4	OTU_6083	11.4444	Bacteria	Proteobacteria	Gammaproteobacteria	Chromatiales	Ectothiorhodospiraceae	Ectothiorhodospira	Methylohalomonas_lacus
gfpps1/2/3/4	OTU_1293	31.5556	Bacteria	Proteobacteria	Betaproteobacteria	Burkholderiales	Comamonadaceae	Polaromonas	Polaromonas_glacialis
gfpps1/2/3/4	OTU_2174	10.6667	Bacteria	Firmicutes	Bacilli	Bacillales	Bacillaceae_1	Bacillus	Bacillus_huizhouensis
gfpps1/2/3/4	OTU_5252	15.3333	Bacteria	Proteobacteria	Gammaproteobacteria	Xanthomonadales	Sinobacteraceae	Alkanibacter	Alkanibacter_difficilis
gfpps1/2/3/4	OTU_1731	52	Bacteria	Bacteroidetes	Flavobacteriia	Flavobacteriales	Flavobacteriaceae	Flavobacterium	Flavobacterium_hauense
gfpps1/2/3/4	OTU_2292	9.33333	Bacteria	Proteobacteria	Betaproteobacteria	Burkholderiales	Comamonadaceae	Ramlibacter	Ramlibacter_henchirensis
gfpps1/2/3/4	OTU_4409	8	Bacteria	Proteobacteria	Alphaproteobacteria	Rhizobiales	Xanthobacteraceae	Starkeya	Starkeya_koreensis
gfpps1/2/3/4	OTU_5791	11.2222	Bacteria	Proteobacteria	Alphaproteobacteria	Caulobacterales	Caulobacteraceae	Brevundimonas	Brevundimonas_basaltis
gfpps1/2/3/4	OTU_5908	15.3333	Bacteria	Actinobacteria	Actinobacteria	Actinomycetales	Nocardioidaceae	Nocardioides	Nocardioides_marinquilinus
gfpps1/2/3/4	OTU_2832	7.88889	Bacteria	Actinobacteria	Actinobacteria	Actinomycetales	Streptomycetaceae	Streptomyces	Streptomyces_durhamensis
gfpps1/2/3/4	OTU_5306	11.3333	Bacteria	Proteobacteria	Deltaproteobacteria	Myxococcales	Haliangiaceae	Haliangium	Haliangium_tepidum
gfpps1/2/3/4	OTU_1579	14.2222	Bacteria	Proteobacteria	Betaproteobacteria	Burkholderiales	Burkholderiaceae	Chitinimonas	Chitinimonas_taiwanensis
gfpps1/2/3/4	OTU_3222	7.88889	Bacteria	Actinobacteria	Actinobacteria	Acidimicrobiales	Acidimicrobineae_incertae_sedis	Aciditerrimonas	Aciditerrimonas_ferrireducens
gfpps1/2/3/4	OTU_4210	7.77778	Bacteria	Proteobacteria	Alphaproteobacteria	Rhodospirillales	Rhodospirillaceae	Telmatospirillum	Telmatospirillum_siberiense
gfpps1/2/3/4	OTU_6018	8.11111	Bacteria	Parcubacteria	Epsilonproteobacteria	Sphingomonadales	Helicobacteraceae	Parcubacteria_genera_incertae_sedis	Sulfurimonas_autotrophica
gfpps1/2/3/4	OTU_1438	42.3333	Bacteria	Actinobacteria	Actinobacteria	Actinomycetales	Streptosporangiaceae	Nonomuraea	Nonomuraea_salmonea
gfpps1/2/3/4	OTU_660	69.5556	Bacteria	Proteobacteria	Gammaproteobacteria	Pseudomonadales	Pseudomonadaceae	Pseudomonas	Pseudomonas_chengduensis
gfpps1/2/3/4	OTU_1958	16	Bacteria	Proteobacteria	Deltaproteobacteria	Myxococcales	Cystobacteraceae	Cystobacter	Cystobacter_gracilis
gfpps1/2/3/4	OTU_2317	10.5556	Bacteria	Proteobacteria	Alphaproteobacteria	Caulobacterales	Caulobacteraceae	Caulobacter	Caulobacter_fusiformis
gfpps1/2/3/4	OTU_3533	11.7778	Bacteria	Actinobacteria	Actinobacteria	Actinomycetales	Micromonosporaceae	Actinoplanes	Actinoplanes_utahensis
gfpps1/2/3/4	OTU_2232	7	Bacteria	Proteobacteria	Betaproteobacteria	Burkholderiales	Burkholderiales_incertae_sedis	Ideonella	Ideonella_dechloratans
gfpps1/2/3/4	OTU_3636	7.11111	Bacteria	Actinobacteria	Actinobacteria	Actinomycetales	Microbacteriaceae	Agromyces	Agromyces_mediolanus
gfpps1/2/3/4	OTU_1830	37.4444	Bacteria	Proteobacteria	Alphaproteobacteria	Rhizobiales	Methylobacteriaceae	Methylobacterium	Methylobacterium_zatmanii
gfpps1/2/3/4	OTU_5665	10.1111	Bacteria	Proteobacteria	Betaproteobacteria	Burkholderiales	Oxalobacteraceae	Massilia	Massilia_haematophila
gfpps1/2/3/4	OTU_4420	30.1111	Bacteria	Proteobacteria	Deltaproteobacteria	Myxococcales	Polyangiaceae	Chondromyces	Chondromyces_lanuginosus
gfpps1/2/3/4	OTU_1745	116.889	Bacteria	Proteobacteria	Alphaproteobacteria	Rhizobiales	Rhizobiaceae	Rhizobium	Rhizobium_tarimense
gfpps1/2/3/4	OTU_3035	21.3333	Bacteria	Actinobacteria	Actinobacteria	Actinomycetales	Micromonosporaceae	Rugosimonospora	Rugosimonospora_acidiphila
gfpps1/2/3/4	OTU_2861	13.3333	Bacteria	Actinobacteria	Actinobacteria	Actinomycetales	Streptomycetaceae	Streptomyces	Streptomyces_hokutonensis
gfpps1/2/3/4	OTU_3535	11.6667	Bacteria	Actinobacteria	Actinobacteria	Actinomycetales	Microbacteriaceae	Herbiconiux	Herbiconiux_ginsengi
gfpps1/2/3/4	OTU_2266	70	Bacteria	Actinobacteria	Actinobacteria	Actinomycetales	Streptosporangiaceae	Streptosporangium	Streptosporangium_album
gfpps1/2/3/4	OTU_2746	12.1111	Bacteria	Proteobacteria	Gammaproteobacteria	Pseudomonadales	Pseudomonadaceae	Rhizobacter	Aquabacterium_limnoticum
gfpps1/2/3/4	OTU_1730	19.8889	Bacteria	Actinobacteria	Actinobacteria	Actinomycetales	Microbacteriaceae	Microbacterium	Microbacterium_radiodurans
gfpps1/2/3/4	OTU_3813	10.7778	Bacteria	Actinobacteria	Actinobacteria	Actinomycetales	Pseudonocardiaceae	Lentzea	Lentzea_flaviverrucosa
gfpps1/2/3/4	OTU_2476	60.8889	Bacteria	Actinobacteria	Actinobacteria	Actinomycetales	Pseudonocardiaceae	Actinophytocola	Actinophytocola_corallina
gfpps1/2/3/4	OTU_3633	13.4444	Bacteria	Firmicutes	Clostridia	Clostridiales	Clostridiaceae_1	Clostridium_sensu_stricto	Nitrolancea_hollandica
gfpps1/2/3/4	OTU_4779	13.4444	Bacteria	Proteobacteria	Betaproteobacteria	Burkholderiales	Oxalobacteraceae	Massilia	Massilia_haematophila
gfpps1/2/3/4	OTU_3396	31.8889	Bacteria	Actinobacteria	Actinobacteria	Actinomycetales	Pseudonocardiaceae	Cryptosporangium	Prauserella_alba
gfpps1/2/3/4	OTU_2376	10.7778	Bacteria	Proteobacteria	Alphaproteobacteria	Rhizobiales	Bradyrhizobiaceae	Bradyrhizobium	Bradyrhizobium_denitrificans
gfpps1/2/3/4	OTU_3764	16.2222	Bacteria	Proteobacteria	Alphaproteobacteria	Sphingomonadales	Sphingomonadaceae	Novosphingobium	Novosphingobium_subterraneum
